# Supplementary material for: Protist communities along freshwater–marine transition zones in Hudson Bay (Canada)
Source: Oxford University Press journal article supplement (doi:10.1525/elementa.2021.00111), 2021-01-01
Supplement: supplementary_table_s3.dna_otus_table_relative6010.xlsx [file supplementary_table_s3.dna_otus_table_relative6010.xlsx]

## Sheet: Supplementary_data1.Hudson_DNA_
OTU_ID	GW-A (rep1)	GW-A (rep2)	GW-B (rep1)	GW-B (rep2)	GW-C (surface - rep1)	GW-C (surface - rep2)	GW-C (SCM - rep1)	GW-C (SCM - rep2)	CH-A (surface - rep1)	CH-A (surface - rep2)	CH-B (surface)	CH-B (bottom)	CH-C (surface)	CH-C (bottom)	CH-D (surface)	CH-D (bottom)	CH-E (surface)	CH-E (bottom)	NE-A	HA-A	NE-B	NE-C	NE-D (surface)	NE-D (bottom)	NE-E (surface)	NE-E (bottom)	NE-45 (surface - rep1)	NE-45 (surface - rep2)	NE-45 (bottom - rep1)	NE-WE1 (surface)	NE-WE1 (bottom)	NE-WE2 (surface)	NE-WE2 (bottom)	NE-WE3 (surface)	NE-WE3 (bottom)	NE-46 (surface)	NE-46 (SCM)	Kingdom	Phylum	Class	Order	Family	Genus	Species
OTU_980	0	2.25e-05	0.1096	0.122746	0.0111801	0.0230746	0.00613607	0.00753035	0	0.000218436	0.00189389	0.00627075	0.00301921	0.00790001	1.76e-05	0.00619157	3.49e-05	0.00316853	0	0	0	0.000508697	0.00405321	0.000801833	0.00146257	0.00457304	0.000485378	0.00039273	0.000403276	0.000146751	0.000387962	0.000379363	0.00152581	0.0023025	0.00402998	0.00134612	0.00207574	Eukaryota	Alveolata	Ciliophora	Ciliophora_X	Ciliophora_XX	Ciliophora_XXX	Mesodinium_unclassified
OTU_453	5.99e-05	0	0.0833719	0.0733908	0.00194827	0.00271323	0	5.04e-05	0	0	0.000835538	0.0109508	0.00256348	0.00378028	0.00089852	0.00153764	0.00190347	0.00870904	0	0	1.83e-05	3.91e-05	0.0207646	0.000945017	0.132957	0.0763463	0.0488498	0.122343	0.0797556	0.0408805	0.0262152	0.00410073	0.0123391	0.0151058	0.016394	0.0186413	0.00527349	Eukaryota	Alveolata	Ciliophora	Spirotrichea	Strombidiida	Strombidiidae_R	Strombidiidae_R_unclassified
OTU_6596	3e-05	0	0.0585112	0.0534856	0.00113899	0.00359604	0	0	0	0	0.000389918	0.00746957	0.00173747	0.00239161	0.000422833	0.00065606	0.00103032	0.00481476	0	2.9e-05	0	5.87e-05	0.0158268	0.000601375	0.0922101	0.0552464	0.0283946	0.0758126	0.0503319	0.0259539	0.0139389	0.00289038	0.00782805	0.010902	0.0107036	0.0116891	0.00302945	Eukaryota	Alveolata	Ciliophora	Spirotrichea	Strombidiida	Strombidiidae_R	Strombidium_R_unclassified
OTU_69	3e-05	0	0.0447533	0.0415112	0.000929173	0.00137686	0	0	0	0	0.000529174	0.00984415	0.00145264	0.00145039	0.000634249	0.000512547	0.000890612	0.00384118	0	0	1.83e-05	3.91e-05	0.0184003	0.00100229	0.0845556	0.0476975	0.0242862	0.0748857	0.0484241	0.0259748	0.0150751	0.0024207	0.00608111	0.00800642	0.00867252	0.00892872	0.00216924	Eukaryota	Alveolata	Ciliophora	Spirotrichea	Strombidiida	Strombidiidae_R	Strombidium_R_unclassified
OTU_6838	0	0	0.0102983	0.0243479	0.00875221	0.0112579	0	0	0	0	0.000167108	0.000207488	0.00240683	0.00314766	1.76e-05	2.05e-05	0.000122241	0.000106208	0	0	0	0	0	0	6.83e-05	0.00179895	0.000676062	0.00160234	0.00130289	0.00534591	0.00307598	0.0138377	0.000199018	0.00781454	0.00114452	0.00172099	0.000205704	Eukaryota	Alveolata	Ciliophora	Spirotrichea	Strombidiida_F	Strombidiida_F_X	Strombidiida_F_XX_sp.
OTU_1602	0	0.000179864	0.020315	0.0170939	0.0189132	0.012165	0.000476588	0.000604443	0	0	0.000111405	0.000207488	0.00173747	0.00101836	1.76e-05	0.000512547	3.49e-05	0.000371727	0	0	0	0	1.61e-05	1.43e-05	4.1e-05	3.36e-05	0	4.71e-05	6.2e-05	0.000104822	8.31e-05	0	0.000154792	5.23e-05	0.00011284	0.000119277	0.000149603	Eukaryota	Hacrobia	Cryptophyta	Cryptophyceae	Cryptophyceae_X	Cryptomonadales	Plagioselmis_prolonga
OTU_4347	0	0	0.019973	0.0158097	0.000389653	0.000591242	0	0	0	0	0.00022281	0.00329675	0.000555421	0.000879494	0.00017618	0.000307528	0.000506426	0.00166392	0	0	1.83e-05	1.96e-05	0.00469657	0.000372279	0.0323405	0.0168631	0.0102103	0.0300831	0.0185507	0.00947589	0.00975448	0.000632271	0.00331697	0.0031921	0.00324011	0.00303304	0.000822814	Eukaryota	Alveolata	Ciliophora	Spirotrichea	Strombidiida	Strombidiidae_R	Strombidium_R_unclassified
OTU_691	0	0	0.0205161	0.0145949	0.00416629	0.00498101	0.000139005	0.000201481	0	0	5.57e-05	6.92e-05	0.00113933	0.00111094	1.76e-05	0.000287026	1.75e-05	0.000106208	0	0	0	0	0	0	4.1e-05	3.36e-05	0	3.14e-05	0	4.19e-05	0.000138558	0.000108389	0	8.72e-05	0.000128959	3.41e-05	5.61e-05	Eukaryota	Eukaryota_unclassified	Eukaryota_unclassified	Eukaryota_unclassified	Eukaryota_unclassified	Eukaryota_unclassified	Eukaryota_unclassified
OTU_307	5.99e-05	0	0.018907	0.0133627	0.00827264	0.046133	0	0.000302221	0	0	0.000919092	0.00682405	0.0213623	0.00527696	0.0108703	0.0102714	0.0114033	0.00177013	0	0	0	0	0	0	6.83e-05	8.41e-05	0.000156014	0.000109964	0.000201638	0.000188679	0	5.42e-05	0.000176905	0.00038375	8.06e-05	0.000323751	0.000130902	Eukaryota	Stramenopiles	Ochrophyta	Bacillariophyta	Bacillariophyta_X	Polar-centric-Mediophyceae	Chaetoceros_decipiens
OTU_815	0	0.000134898	0.012189	0.0128942	0.0276954	0.0189521	0.0108027	0.00881479	0	0	8.36e-05	0.00984415	0.00422975	0.0128684	0.000229035	0.0213835	0.0171486	0.0100543	0	1.45e-05	7.32e-05	0	0.000144757	2.86e-05	0.0118782	0.0112477	0.0166762	0.022904	0.0068712	0.00955975	0.00557003	0.0319929	0.00229977	0.0256415	0.00678649	0.0229523	0.00289855	Eukaryota	Alveolata	Dinoflagellata	Dinophyceae	Gymnodiniales	Gymnodiniaceae	Gyrodinium_unclassified
OTU_1099	0	0	0.0134562	0.0123562	0.000329707	0.000477853	0	0	0	0	2.79e-05	0.00101439	0.000227865	0.000308594	5.29e-05	2.05e-05	0.000104778	0.000584143	0	0	0	0	0.00284689	0.000171821	0.0159652	0.00877621	0.00528715	0.0147666	0.00983373	0.00566038	0.00354708	0.00077679	0.00119411	0.00261648	0.00182155	0.00173803	0.000336606	Eukaryota	Alveolata	Ciliophora	Spirotrichea	Strombidiida	Strombidiidae_R	Strombidium_R_unclassified
OTU_955	0	0	0.00752258	0.0123215	0.000779306	0.000599341	0	0	0	0	0.00292438	0.00435725	0.0145691	0.0136399	0.000563777	0.00100459	0.000366723	0.000743455	0	0	0	0	1.61e-05	0	0	0.000470754	0.000312029	6.28e-05	6.2e-05	0.00109015	0.000249404	0.0030349	2.21e-05	0.00385494	0	0.000408949	5.61e-05	Eukaryota	Alveolata	Ciliophora	Spirotrichea	Strombidiida	Tontoniidae_A	Laboea_unclassified
OTU_276	0	0	0.0224672	0.0119744	0.0066241	0.00991342	1.99e-05	0	0	0	0	0.000207488	0.000199382	0.000200586	0.000123326	0.00102509	0.000366723	7.08e-05	0	0	0	0	0	0	2.73e-05	0.000269003	0.000190684	4.71e-05	0.000155106	0.000272537	0.000138558	5.42e-05	0.000530715	0.000680284	0.000290159	0.000425989	0.000710612	Eukaryota	Stramenopiles	Ochrophyta	Bacillariophyta	Bacillariophyta_X	Polar-centric-Mediophyceae	Chaetoceros_decipiens
OTU_455	0	0	0.0127924	0.0114364	0.000299733	0.000421158	0	0	0	0	0.000139256	0.00170601	0.000598146	0.000586329	0.000264271	0.000164015	0.000331797	0.00157542	0	0	0	0	0.0038602	0.000157503	0.0216925	0.0122396	0.00688197	0.0183169	0.011726	0.00828092	0.00387962	0.000722596	0.0032064	0.00225017	0.00294995	0.00250481	0.00057971	Eukaryota	Alveolata	Ciliophora	Spirotrichea	Strombidiida	Strombidiidae_R	Strombidium_R_unclassified
OTU_577	0	0	0.0074019	0.00718463	0.000689386	0.000526448	0	0	0	0	0	4.61e-05	7.12e-05	0.000169727	0	0	0	0	0	0	0	0	0	0	4.1e-05	0.000891071	0.000606722	0.000377021	0.000372255	0.00226415	0.00182896	0.00131874	0.000221131	0.0024246	0.000386878	0.000562305	7.48e-05	Eukaryota	Alveolata	Ciliophora	Spirotrichea	Strombidiida_F	Strombidiida_F_X	Strombidiida_F_XX_sp.
OTU_568	0	0	0.0103184	0.00690696	0.000749333	0.000591242	0	0	0	0	8.36e-05	0.00140631	0.000555421	0.000848634	0.000158562	0.000307528	0.000279408	0.00173473	0	0	0	0	0.000788123	1.43e-05	0.00710781	0.00738076	0.0086848	0.00929984	0.00521156	0.00408805	0.0040736	0.00084905	0.00141524	0.00388983	0.00251471	0.00352719	0.000972417	Eukaryota	Alveolata	Ciliophora	Spirotrichea	Strombidiida	Strombidiidae_R	Strombidium_R_unclassified
OTU_2237	0	0	0.00961442	0.00688961	0.0008992	0.00119868	0.000337583	0.000554072	0	0	0.000250661	0.000899115	0.00961306	0.00286993	0.000123326	0.000348532	0.00017463	0.00116829	0	0	1.83e-05	0.000626088	0.00524343	0.00148912	0.00292514	0.00798601	0.00426439	0.00574956	0.00406378	0.00754717	0.00701103	0.0106222	0.00035381	0.000662841	0.000725397	0.00209587	0.00056101	Eukaryota	Alveolata	Dinoflagellata	Dinophyceae	Peridiniales	Peridiniales_unclassified	Peridiniales_unclassified
OTU_2495	0	0	0.00864895	0.00669871	0.000869226	0.000720829	0	0	0	0	0.00022281	0.000853006	0.0111511	0.00265391	3.52e-05	6.15e-05	6.99e-05	0.000867364	0	0	5.49e-05	0.00103696	0.00673926	0.00184708	0.00358124	0.00724626	0.00381368	0.00669212	0.00469972	0.0081761	0.00687247	0.011146	0.000243244	0.000680284	0.000225679	0.00160172	0.000467508	Eukaryota	Alveolata	Dinoflagellata	Dinophyceae	Peridiniales	Heterocapsaceae	Heterocapsa_rotundata
OTU_3830	0	0	0.00325844	0.00645576	0.00185835	0.00211389	0	0	0	0	0.000167108	0.000806898	0.00140992	0.00558556	8.81e-05	0.00114811	1.75e-05	0.000354026	0	0	0	0	1.61e-05	0	0	0.000201752	0.000208019	0.000424148	0.000139595	0.00222222	0.000277116	0.00121035	2.21e-05	0.00249438	8.06e-05	0.000715661	5.61e-05	Eukaryota	Alveolata	Ciliophora	Spirotrichea	Strombidiida_G	Strombidiida_G_X	Strombidiida_G_XX_sp.
OTU_11158	0	6.74e-05	0.00313776	0.00636898	0.000329707	0.000380662	0	0	0	0	0.00153182	0.00200572	0.00796103	0.0066965	0.000193798	0.00043054	0.000157167	0.000371727	0	0	0	0	3.22e-05	0	0	0.000420316	3.47e-05	1.57e-05	6.2e-05	0.000607966	5.54e-05	0.00151745	0	0.00170943	3.22e-05	0.000340791	0	Eukaryota	Alveolata	Ciliophora	Spirotrichea	Strombidiida	Tontoniidae_A	Laboea_strobila
OTU_21515	3e-05	0	0.00543074	0.00631692	0.0153164	0.0141655	0.0078637	0.00664887	0	0	0	0.000968277	0.00267741	0.00379571	0.000158562	0.00284976	0.00185108	0.00154001	0	0	0	0	1.61e-05	0	0.000929482	0.000857445	0.00171616	0.0025606	0.000635935	0.00100629	0.000498808	0.00422718	0.00035381	0.00293045	0.000918836	0.00286264	0.000467508	Eukaryota	Alveolata	Dinoflagellata	Dinophyceae	Gymnodiniales	Gymnodiniaceae	Gyrodinium_unclassified
OTU_3934	0	2.25e-05	0.00454573	0.00603926	0.00098912	0.000485952	0.000496445	0.000554072	0	0	0	0.000414976	0.000170899	0.000385743	0	0.000369034	0	0.000318624	0	0	0	1.96e-05	0.000112589	0	8.2e-05	0.000302628	3.47e-05	1.57e-05	0	4.19e-05	0	7.23e-05	0.000154792	0.000244205	0.000274039	8.52e-05	0.000187003	Eukaryota	Alveolata	Ciliophora	Ciliophora_X	Ciliophora_XX	Ciliophora_XXX	Mesodinium_rubrum
OTU_4645	3e-05	4.5e-05	0.00490778	0.00574423	0.002248	0.00523208	0.00139005	0.00211555	0	0	0	0.000115271	0.000541179	0.000771486	7.05e-05	0.000389536	6.99e-05	0.000106208	0	0	0	0	3.22e-05	0	2.73e-05	0.000201752	0.000208019	0.000204219	0.000201638	2.1e-05	8.31e-05	0.000108389	0.000132679	0.000156989	0.000161199	0.000187435	0.000280505	Eukaryota	Alveolata	Dinoflagellata	Dinophyceae	Dinophyceae_unclassified	Dinophyceae_unclassified	Dinophyceae_unclassified
OTU_57	8.99e-05	8.99e-05	0.00633586	0.00570953	0.00890208	0.00918449	0.0055999	0.0030474	0	7.28e-05	0.000473472	0.00142936	0.00393067	0.00481407	0.000229035	0.00520748	0.000785834	0.000991273	0.000195612	1.45e-05	5.49e-05	0.000136957	1.61e-05	1.43e-05	0.000273377	0.000588443	0.000693397	0.00108393	0.000853084	0.00207547	0.00182896	0.00113809	0.000972978	0.0017792	0.00133795	0.00132909	0.00115942	Eukaryota	Alveolata	Dinoflagellata	Dinophyceae	Gymnodiniales	Gymnodiniaceae	Gymnodinium_dorsalisulcum
OTU_19712	0	4.5e-05	0.00341935	0.00569217	0.0121392	0.0103751	0.00397156	0.00329925	0	0	0	0.00373478	0.00156657	0.00657306	3.52e-05	0.0097384	0.00682802	0.00354026	0	1.45e-05	0	3.91e-05	6.43e-05	0	0.00405965	0.00418635	0.00814742	0.0111221	0.0024817	0.00387841	0.00180125	0.0149397	0.0010172	0.0112508	0.00267591	0.00993406	0.00115942	Eukaryota	Alveolata	Dinoflagellata	Dinophyceae	Gymnodiniales	Gymnodiniaceae	Gyrodinium_unclassified
OTU_334	0	0	0.00701973	0.00544921	0.000569493	0.000656035	0	0	0	0	0	0.000322759	0.000327556	0.00145039	0	0.000307528	3.49e-05	1.77e-05	0	0	0	0	3.22e-05	0	0	0.000235377	0.000346699	0.000612658	0.000108574	0.00190776	0.000221693	0.000343233	2.21e-05	0.0014129	3.22e-05	0.00037487	1.87e-05	Eukaryota	Alveolata	Ciliophora	Spirotrichea	Spirotrichea_unclassified	Spirotrichea_unclassified	Spirotrichea_unclassified
OTU_59	0	2.25e-05	0.00531006	0.0053798	0.000569493	0.000656035	0	0	0	0	0	0.000714681	0.000128174	0.000462892	7.05e-05	0.000123011	5.24e-05	0.000159312	0	0	0	0	0.00065945	2.86e-05	0.000519417	0.00205114	0.00409104	0.00105252	0.000930637	0.00230608	0.00152414	0.000704531	0.000884525	0.00252926	0.00377206	0.00216402	0.00117812	Eukaryota	Alveolata	Ciliophora	Spirotrichea	Strombidiida	Strombidiida_unclassified	Strombidiida_unclassified
OTU_2246	0	0	0.00207173	0.00525832	0.00305728	0.00330447	0	0	0	0	5.57e-05	6.92e-05	0.000769045	0.00100293	3.52e-05	0	0	0	0	0	0	0	0	0	4.1e-05	0.000369878	0.000242689	0.000235638	0.000170617	0.00138365	0.000775924	0.00444396	2.21e-05	0.0023025	0.000354639	0.000289672	0.000112202	Eukaryota	Alveolata	Ciliophora	Spirotrichea	Strombidiida_F	Strombidiida_F_X	Strombidiida_F_XX_sp.
OTU_2224	0	4.5e-05	0.00412334	0.00524096	0.0131583	0.010286	0.00466659	0.00370221	0	0	0	0.00442641	0.00203654	0.00797716	0.000105708	0.0121371	0.00913314	0.00587683	9.78e-05	1.45e-05	1.83e-05	1.96e-05	0.000128673	0	0.00534452	0.00532961	0.00946487	0.0138084	0.00311763	0.00446541	0.00224464	0.0186791	0.00108354	0.0139545	0.00343355	0.0125241	0.00155213	Eukaryota	Alveolata	Dinoflagellata	Dinophyceae	Gymnodiniales	Gymnodiniaceae	Gyrodinium_helveticum
OTU_2935	0	0	0.00351992	0.00517155	0.00161856	0.00281042	0.000734739	0.0011837	0	0	2.79e-05	0.000253596	0.000512696	0.000370313	1.76e-05	0.00032803	6.99e-05	0	0	0	0	0	0	0	2.73e-05	0.00031944	0.000329364	0.000298475	0.000124085	6.29e-05	0.000249404	5.42e-05	8.85e-05	8.72e-05	1.61e-05	0.000272633	0.000168303	Eukaryota	Alveolata	Dinoflagellata	Dinophyceae	Peridiniales	Peridiniales_unclassified	Peridiniales_unclassified
OTU_3065	0	2.25e-05	0.00297685	0.00452944	0.00428618	0.00587192	0.00736725	0.0102	0	0	0.000139256	0.00260513	0.00187989	0.00378028	0.00081043	0.00282926	0.00495949	0.00100898	0	0	0	0	3.22e-05	0	8.2e-05	0.000554818	0.00220154	0.000361311	0.000697977	0.00033543	0.000997617	0.000704531	0.00121622	0.000889602	0.00203111	0.00175507	0.00370266	Eukaryota	Alveolata	Dinoflagellata	Dinophyceae	Dinophyceae_unclassified	Dinophyceae_unclassified	Dinophyceae_unclassified
OTU_779	0	0	0.002474	0.00413029	0.00152864	0.00868234	0.00180706	0.00664887	0	0	0.0680685	0.00590188	0.00246379	0.000771486	0.000405215	0.000963589	0.000104778	0.00191174	0.00016301	0	0.00100672	0.000997828	0.00468049	0.00170389	9.57e-05	0.000655694	0.0021322	0.00271769	0.000837573	0.00157233	0	0.000794855	0.000641281	0.00655864	0.00124124	0.000408949	0.000130902	Eukaryota	Alveolata	Ciliophora	Litostomatea	Haptoria_4	Didiniidae	Didiniidae_X_sp.
OTU_97	0	6.74e-05	0.00468653	0.00404352	0.00722357	0.00575043	0.00740697	0.0035511	0	0	0.000111405	0.00140631	0.00244955	0.00216016	0.000105708	0.00252173	0.000593741	0.0012922	3.26e-05	0	0	0	8.04e-05	0.000128866	0.000779125	0.00102557	0.00147347	0.000895424	0.000853084	0.00169811	0.00235548	0.00110196	0.00148158	0.00188386	0.00201499	0.00168691	0.00282375	Eukaryota	Alveolata	Dinoflagellata	Dinophyceae	Gymnodiniales	Gymnodiniaceae	Gymnodiniaceae_unclassified
OTU_1914	0	0	0.00233321	0.00392204	0.00140875	0.00187901	0	5.04e-05	0	0	0.000139256	0.000576356	0.00105388	0.00453634	0.000105708	0.00065606	5.24e-05	0.000177013	0	0	0	0	0	0	0	6.73e-05	0.000121344	0.000267056	9.31e-05	0.00127883	0.000249404	0.00074066	2.21e-05	0.00115125	0	0.000204475	3.74e-05	Eukaryota	Alveolata	Ciliophora	Spirotrichea	Strombidiida_G	Strombidiida_G_X	Strombidiida_G_XX_sp.
OTU_731	0	0	0.00561176	0.00390469	0.00155861	0.00122298	0.00139005	0.00156148	0	0	0.00022281	0.00059941	0.00454306	0.00162012	0.000105708	0.000307528	0.000227019	0.00026552	0	0	1.83e-05	0.00041087	0.00215528	0.000615693	0.00107984	0.00359791	0.00227088	0.00227783	0.00189229	0.0036478	0.00365793	0.00569044	0.000398036	0.000575625	0.000402998	0.00149948	0.000542309	Eukaryota	Alveolata	Dinoflagellata	Dinophyceae	Peridiniales	Peridiniales_unclassified	Peridiniales_unclassified
OTU_177	0	0	0.002474	0.00381792	0.00017984	0.000145786	0	0	0	0	0.000417769	0.00154463	0.00145264	0.00274649	3.52e-05	0.000164015	0	0.000123909	0	0	0	0	3.22e-05	0	0	0.000100876	3.47e-05	1.57e-05	1.55e-05	0.000251572	0	0.00119228	0	0.00160477	0	0.000306712	0	Eukaryota	Alveolata	Ciliophora	Spirotrichea	Strombidiida	Tontoniidae_A	Tontoniidae_A_X_sp.
OTU_23283	0	6.74e-05	0.00279582	0.00364438	0.00830261	0.00744316	0.00399142	0.00317332	0	0	2.79e-05	0.000899115	0.0010966	0.00291622	0.000105708	0.00272675	0.00200824	0.00146921	3.26e-05	1.45e-05	1.83e-05	0	0	0	0.000792794	0.000991947	0.00228821	0.00241922	0.000651446	0.000922432	0.000914482	0.00410073	0.000486489	0.00300023	0.00138631	0.00289672	0.000804114	Eukaryota	Alveolata	Dinoflagellata	Dinophyceae	Dinophyceae_unclassified	Dinophyceae_unclassified	Dinophyceae_unclassified
OTU_188	0	2.25e-05	0.00299696	0.00338406	0.000779306	0.000971904	0.000417014	0.000679998	0	0	0	0.000829952	5.7e-05	0.000401173	0	0.000246023	8.73e-05	0.000194714	0	0	0	0	1.61e-05	0	0.00226903	0.00226971	0.00220154	0.00251347	0.00133391	0.000440252	0.000332539	0.00148132	0	0.00195364	0.000451358	0.00102237	9.35e-05	Eukaryota	Alveolata	Dinoflagellata	Dinophyceae	Gymnodiniales	Gymnodiniaceae	Gyrodinium_helveticum
OTU_2099	0	0	0.00287628	0.00334936	0.00974133	0.00785622	0.00361412	0.00352592	0	0	0	0.000414976	0.00131022	0.00178985	0.000140944	0.00118911	0.00082076	0.000619546	0	0	0	0	0	0	0.000382728	0.00031944	0.000849411	0.00130386	0.000325723	0.000419287	0.000387962	0.00166197	0.000154792	0.0014129	0.000306279	0.0016358	0.000261805	Eukaryota	Alveolata	Dinoflagellata	Dinophyceae	Dinophyceae_unclassified	Dinophyceae_unclassified	Dinophyceae_unclassified
OTU_15788	0	6.74e-05	0.00223264	0.00321052	0.00785301	0.00613109	0.00325668	0.00269481	0	0	0	0.000576356	0.00111084	0.00194414	5.29e-05	0.00129162	0.00103032	0.00067265	0	0	0	0	0	0	0.000519417	0.000521192	0.00107477	0.00130386	0.000279191	0.000461216	0.000498808	0.00202327	0.000154792	0.00150011	0.000580318	0.00131204	0.000280505	Eukaryota	Alveolata	Dinoflagellata	Dinophyceae	Dinophyceae_unclassified	Dinophyceae_unclassified	Dinophyceae_unclassified
OTU_631	0	0	0.00126717	0.00317581	0.00080928	0.00140926	0	7.56e-05	0	0	2.79e-05	9.22e-05	0.000199382	0.000416602	1.76e-05	0	0	1.77e-05	0	0	0	0	0	0	0	0.000184939	0.000173349	9.43e-05	0.000170617	0.000922432	0.00052652	0.00204133	0	0.0016571	0.000209559	0.000221514	0.000168303	Eukaryota	Alveolata	Ciliophora	Spirotrichea	Strombidiida_F	Strombidiida_F_X	Strombidiida_F_XX_sp.
OTU_351	0	0	0.00506869	0.00315846	5.99e-05	2.43e-05	0	0	0	0	0	0.000276651	0.000199382	0.000370313	0	0	0	0.000106208	0	0	0	0	0	0	0	0.000386691	8.67e-05	3.14e-05	1.55e-05	0.000314465	2.77e-05	0.000216779	0	0.000854716	0	8.52e-05	0	Eukaryota	Alveolata	Ciliophora	Spirotrichea	Strombidiida	Tontoniidae_A	Tontoniidae_A_X_sp.
OTU_907	0	0	0.00267514	0.00315846	0.000419627	0.000275373	0	0	0	0	0.000891241	0.00131409	0.00507	0.00509181	0.00017618	0.00065606	0.000122241	0.000283221	0	0	0	0	0	0	0	0.000201752	5.2e-05	3.14e-05	0	0.000314465	8.31e-05	0.00117422	0	0.00130824	0	0.000136316	0	Eukaryota	Alveolata	Ciliophora	Spirotrichea	Strombidiida	Tontoniidae_A	Laboea_strobila
OTU_222	0	0	0.00177002	0.00303698	0.00035968	0.000210579	3.97e-05	0	0	4.85e-05	0.000919092	0.0048875	0.0146546	0.00811603	0.130514	0.000902083	0.021689	0.0243747	0	0	1.83e-05	0	0	0	0.000437403	0.00379966	0.010505	0.0065036	0.00718141	0.00220126	0.0093388	0.0071537	0.00988457	0.00404682	0.0102039	0.0118595	0.00508649	Eukaryota	Hacrobia	Telonemia	Telonemia_X	Telonemia_XX	Telonemia-Group-2	Telonemia-Group-2_X_sp.
OTU_14062	0	0	0.00118672	0.00296757	0.00146869	0.00145786	0	0	0	0	2.79e-05	0	0.000484213	0.000493751	0	0	0	0	0	0	0	0	1.61e-05	0	0	0.000151314	8.67e-05	0.00018851	0.000108574	0.000733753	0.000193981	0.00178842	0.000110566	0.00106403	0.00011284	0.000187435	5.61e-05	Eukaryota	Alveolata	Ciliophora	Spirotrichea	Spirotrichea_unclassified	Spirotrichea_unclassified	Spirotrichea_unclassified
OTU_5875	0	6.74e-05	0.00233321	0.00288079	0.00635434	0.00578283	0.00377298	0.00327406	0	0	0	0.000507193	0.00091146	0.00199043	3.52e-05	0.000963589	0.00113509	0.000495637	0	0	0	0	0	0	0.000341721	0.000386691	0.000693397	0.00109964	0.00026368	0.000356394	0.000221693	0.00122841	0.000199018	0.00113381	0.00011284	0.00112461	0.000187003	Eukaryota	Alveolata	Dinoflagellata	Dinophyceae	Gymnodiniales	Gymnodiniaceae	Gyrodinium_helveticum
OTU_22889	0	8.99e-05	0.00179013	0.00288079	0.00524533	0.00655225	0.00297867	0.00279555	0	0	0	0.000829952	0.00112508	0.001867	1.76e-05	0.00164015	0.00134465	0.000920468	0	0	1.83e-05	0	0	0	0.000710781	0.00082382	0.0014388	0.00193223	0.000573893	0.000733753	0.000554232	0.00296264	0.000199018	0.00186642	0.000693157	0.00223218	0.000317906	Eukaryota	Alveolata	Dinoflagellata	Dinophyceae	Gymnodiniales	Gymnodiniaceae	Gyrodinium_helveticum
OTU_4376	0	4.5e-05	0.00118672	0.00284609	0.00833258	0.0178182	0.00107232	0.000881479	0	0	0.000111405	0.00253596	0.00102539	0.00243789	3.52e-05	0.016012	0.000506426	0.00155772	0.00016301	0	0	0	4.83e-05	0	0.000218702	0.00166445	0.00107477	0.000518403	0.00389316	0.000377358	0.00324225	0.00124648	0.000398036	0.00411659	0.00145079	0.0024537	0.00370266	Eukaryota	Alveolata	Dinoflagellata	Dinophyceae	Dinophyceae_unclassified	Dinophyceae_unclassified	Dinophyceae_unclassified
OTU_6464	0	4.5e-05	0.00303719	0.00275932	0.00191829	0.00125538	0.000476588	0.000453332	0	0	0.000278513	0.000368868	0.00152385	0.00145039	0	0.000512547	0.000279408	0.000566442	0	0	0	0	0	0	9.57e-05	0.000134501	0.000398703	0.000518403	0.000186127	0.000712788	0.00105304	0.000361298	0.000420149	0.000470966	0.000515838	0.000340791	0.000317906	Eukaryota	Alveolata	Dinoflagellata	Dinophyceae	Gymnodiniales	Gymnodiniaceae	Gymnodiniaceae_unclassified
OTU_15713	0	2.25e-05	0.00191081	0.00274196	0.00500555	0.00459225	0.00357441	0.00352592	0	0	0	0.000391922	0.00105388	0.00157383	1.76e-05	0.000984091	0.000925538	0.000495637	0.0033254	8.69e-05	0.00309337	0.000645654	1.61e-05	0	0.000574092	0.000403504	0.000866746	0.00127245	0.000325723	0.000838574	0.000443385	0.0016439	0.000176905	0.00136057	0.000322399	0.00143132	9.35e-05	Eukaryota	Alveolata	Dinoflagellata	Dinophyceae	Gymnodiniales	Gymnodiniaceae	Gyrodinium_helveticum
OTU_2301	0	4.5e-05	0.00195104	0.00267254	0.00746336	0.0070787	0.00474602	0.00438221	0	0	0	0.000391922	0.000939943	0.00177442	1.76e-05	0.00151714	0.00064613	0.000991273	0	0	0	0	0	0	0.000533085	0.00057163	0.0010921	0.00113106	0.000728999	0.000566038	0.000609655	0.00157164	0.000552828	0.00214551	0.000934956	0.00214698	0.000486209	Eukaryota	Alveolata	Dinoflagellata	Dinophyceae	Dinophyceae_unclassified	Dinophyceae_unclassified	Dinophyceae_unclassified
OTU_13076	0	0	0.00118672	0.00267254	0.000509547	0.000137686	0.000714881	0.000554072	0	0	5.57e-05	0.000276651	7.12e-05	0.000293165	0	0.00032803	0	0.000177013	0	0	0	3.91e-05	0.000160842	1.43e-05	0.00012302	0.000369878	3.47e-05	3.14e-05	3.1e-05	0	8.31e-05	1.81e-05	0.000176905	0.000104659	0.000209559	5.11e-05	0.000149603	Eukaryota	Alveolata	Ciliophora	Ciliophora_X	Ciliophora_XX	Ciliophora_XXX	Mesodinium_rubrum
OTU_5795	3e-05	6.74e-05	0.00277571	0.00265519	0.00182837	0.00130397	0.000278009	0.000478517	0	0	5.57e-05	0.000507193	0.00125326	0.00118809	0	0.000287026	0.000122241	0.000300922	3.26e-05	0	0	0	0	0	4.1e-05	0.000218565	0.000329364	0.000267056	0.000201638	0.000754717	0.00116389	0.000270973	0.00035381	0.000436079	0.000483598	0.000221514	0.000243104	Eukaryota	Alveolata	Dinoflagellata	Dinophyceae	Gymnodiniales	Gymnodiniales_unclassified	Gymnodiniales_unclassified
OTU_182	0	0	0.00134763	0.00265519	0.00299733	0.00434117	0.00359427	0.00465925	0	0	0.000111405	0.000853006	0.000512696	0.00109551	0.00017618	0.0011276	0.000925538	0.000354026	0	0	0	0	1.61e-05	0	1.37e-05	0.000184939	0.000641392	9.43e-05	0.000279191	8.39e-05	0.000554232	0.000379363	0.000597055	0.000610511	0.000886596	0.000647503	0.00172043	Eukaryota	Alveolata	Dinoflagellata	Dinophyceae	Dinophyceae_unclassified	Dinophyceae_unclassified	Dinophyceae_unclassified
OTU_4450	0	0	0.00327856	0.00260313	0	1.62e-05	0	0	0	0	2.79e-05	0.000507193	0.00027059	0.000339454	0	0	0	5.31e-05	0	0	0	0	0	0	0	0.000117689	1.73e-05	1.57e-05	1.55e-05	0.000209644	8.31e-05	0.000198714	0	0.000662841	0	0.000102237	0	Eukaryota	Alveolata	Ciliophora	Spirotrichea	Strombidiida	Tontoniidae_A	Tontoniidae_A_X_sp.
OTU_217	0	0	0.00384174	0.00258577	5.99e-05	2.43e-05	0	0	0	0	0	0.000230542	0.000327556	0.000462892	0	4.1e-05	3.49e-05	3.54e-05	0	0	0	0	0	0	0	0.000201752	0.000173349	6.28e-05	3.1e-05	0.000293501	5.54e-05	0.000108389	0	0.000610511	0	0.000102237	0	Eukaryota	Alveolata	Ciliophora	Spirotrichea	Strombidiida	Strombidiidae_R	Strombidium_R_unclassified
OTU_39	0	0	0.00331878	0.00253371	0.0117196	0.00851226	0.00379284	0.00387851	0	2.43e-05	0	0.00221321	0.00113933	0.00439747	1.76e-05	0.00721666	0.00378947	0.00247818	0	1.45e-05	0	0	0.000160842	2.86e-05	0.00191364	0.0026564	0.00416038	0.00488556	0.00153555	0.00238994	0.00205066	0.00713563	0.00157003	0.00772733	0.00377206	0.00761668	0.00177653	Eukaryota	Alveolata	Dinoflagellata	Dinophyceae	Dinophyceae_unclassified	Dinophyceae_unclassified	Dinophyceae_unclassified
OTU_1434	3e-05	0	0.00345958	0.00246429	0.00329707	0.00183852	3.97e-05	5.04e-05	0	0	2.79e-05	2.31e-05	0.00027059	0.000324024	1.76e-05	4.1e-05	0	3.54e-05	0	0	0	0	0	0	0	0	0	3.14e-05	0	0	5.54e-05	0	4.42e-05	0	4.84e-05	5.11e-05	5.61e-05	Eukaryota	Hacrobia	Cryptophyta	Cryptophyceae	Cryptophyceae_X	Cryptomonadales	Plagioselmis_prolonga
OTU_22457	0.000149822	6.74e-05	0.00223264	0.00246429	0.00515541	0.0050296	0.00281981	0.00259407	0	0	5.57e-05	0.000507193	0.00121053	0.00189785	1.76e-05	0.0010866	0.000890612	0.000654948	0.00365142	5.79e-05	0.00258086	0.000665219	0	0	0.000505748	0.000420316	0.000918751	0.00124103	0.00024817	0.000649895	0.000387962	0.00157164	0.000176905	0.00111636	0.000386878	0.00100533	0.000243104	Eukaryota	Alveolata	Dinoflagellata	Dinophyceae	Gymnodiniales	Gymnodiniaceae	Gyrodinium_helveticum
OTU_1149	0	0	0.0037814	0.00244694	0.000599466	0.00060744	0	0	0	0	2.79e-05	0.000484139	0.000213623	0.00052461	0	0.000307528	1.75e-05	0.000442533	0	0	0	0	4.83e-05	4.3e-05	0.0016676	0.00269002	0.00469777	0.00295333	0.00196985	0.000943396	0.00218921	0.00081292	0.000751846	0.00184898	0.00157975	0.00156764	0.00121552	Eukaryota	Alveolata	Ciliophora	Spirotrichea	Strombidiida	Strombidiidae_R	Strombidiidae_R_unclassified
OTU_1002	0	0	0.00253434	0.00242959	0.000239787	0.00020248	0	0	0	0	0	0	7.12e-05	3.09e-05	0	0	0	0	0	0	0	0	0	0	0	0.000353066	0.000190684	0.000219929	0.000294702	0.00140461	0.00088677	0.000541947	2.21e-05	0.00122102	0.000193439	0.000238554	0	Eukaryota	Alveolata	Ciliophora	Spirotrichea	Strombidiida	Strombidiidae_R	Strombidiidae_R_unclassified
OTU_23125	0	0	0.00253434	0.00242959	0.00788298	0.00362034	0.00192621	0.00138518	0	0	0	0.0027204	0.000655112	0.00339454	1.76e-05	0.00680663	0.004715	0.00323934	0	0	1.83e-05	0	0.000112589	2.86e-05	0.00281578	0.00300947	0.0047151	0.00697488	0.00162861	0.00285115	0.00146871	0.00995375	0.000796073	0.00699472	0.00238575	0.00654319	0.000860215	Eukaryota	Alveolata	Dinoflagellata	Dinophyceae	Gymnodiniales	Gymnodiniaceae	Gyrodinium_unclassified
OTU_2072	0	2.25e-05	0.00134763	0.00242959	0.00623445	0.00856895	0.0012709	0.00103259	0	0	0.000278513	0.000622464	0.00196534	0.00225274	0.000140944	0.005433	0.000244482	0.000300922	0	0	0	0	0	0	0.000136689	0.000470754	0.000520048	0.000204219	0.000822062	0.000125786	0.000554232	0.000686466	0.000287471	0.00156989	0.000467478	0.00112461	0.00127162	Eukaryota	Alveolata	Dinoflagellata	Dinophyceae	Dinophyceae_unclassified	Dinophyceae_unclassified	Dinophyceae_unclassified
OTU_5841	0	2.25e-05	0.00181025	0.00241223	0.000869226	0.00180612	0.000873744	0.00148592	0	0	0	4.61e-05	0.000313314	0.000277735	0.000123326	0.000307528	0.000157167	5.31e-05	0	0	0	0	0	0	2.73e-05	3.36e-05	0.000138679	4.71e-05	0.000124085	0	8.31e-05	3.61e-05	6.63e-05	8.72e-05	6.45e-05	3.41e-05	5.61e-05	Eukaryota	Alveolata	Dinoflagellata	Dinophyceae	Dinophyceae_unclassified	Dinophyceae_unclassified	Dinophyceae_unclassified
OTU_1650	0	0	0.00126717	0.00241223	0.00476576	0.00445456	0.00365384	0.00334962	0	0	2.79e-05	0.000391922	0.000712078	0.00141953	5.29e-05	0.000902083	0.0004715	0.000371727	0	0	0	0	0	0	0.000218702	0.000336253	0.000520048	0.000706914	0.000139595	0.000251572	8.31e-05	0.000921309	8.85e-05	0.00127335	0.000274039	0.00102237	0.000130902	Eukaryota	Alveolata	Dinoflagellata	Dinophyceae	Gymnodiniales	Gymnodiniaceae	Gyrodinium_helveticum
OTU_2812	0	0	0.00100569	0.00239488	0.000419627	0.00010529	0.000397156	0.000277036	0	0	8.36e-05	0.000645518	2.85e-05	0.000370313	0	0.00043054	1.75e-05	0.000230117	0	0	0	5.87e-05	0.000176926	4.3e-05	9.57e-05	0.00025219	8.67e-05	4.71e-05	4.65e-05	0	0	1.81e-05	0.000132679	0.000122102	0.000306279	8.52e-05	9.35e-05	Eukaryota	Alveolata	Ciliophora	Ciliophora_X	Ciliophora_XX	Ciliophora_XXX	Mesodinium_rubrum
OTU_1064	0	0	0.00255446	0.00237752	0.000329707	0.000129587	0	0	0	0	0	0.000991332	0.000142416	0.000262305	0	6.15e-05	1.75e-05	0.000123909	0	2.9e-05	0	0	0.000997217	0	0.00393663	0.00356428	0.00249623	0.000235638	0.00158208	0.000566038	0.00221693	0.000162584	0.000464376	0.000226761	0.000870476	0.00039191	0.00057971	Eukaryota	Alveolata	Ciliophora	Spirotrichea	Strombidiida	Strombidiidae_R	Strombidiidae_R_X_sp.
OTU_1029	0.0180685	0.00681236	0.00124706	0.0022734	0	0	0	0	0	0	0.00426125	0.000276651	0	0	0	0	0	0	0.0582597	0.00276519	0.00918859	0.00103696	0	0	0	0	0	0	4.65e-05	0	0	0	0	0	0	0	0	Eukaryota	Hacrobia	Centroheliozoa	Centroheliozoa_X	Pterocystida	Pterocystida_unclassified	Pterocystida_unclassified
OTU_7578	0	0	0.00106603	0.00223869	0.0004496	0.000129587	0.000218436	0.000176296	0	0	0	6.92e-05	1.42e-05	0.000293165	0	0.000287026	0	3.54e-05	0	0	0	0	3.22e-05	1.43e-05	8.2e-05	6.73e-05	3.47e-05	1.57e-05	0	2.1e-05	2.77e-05	0	0.000110566	0.000174432	0.000274039	0.000204475	0.000205704	Eukaryota	Alveolata	Ciliophora	Ciliophora_X	Ciliophora_XX	Ciliophora_XXX	Mesodinium_rubrum
OTU_22762	0	4.5e-05	0.00229298	0.00220398	0.010131	0.00531307	0.00144962	0.00105777	0	0	0	0.0035273	0.000811769	0.0049838	0	0.010415	0.00684549	0.00431912	0	1.45e-05	0	1.96e-05	0.000112589	1.43e-05	0.00322585	0.0035811	0.00639659	0.00940981	0.00212495	0.00354298	0.00205066	0.0134583	0.000972978	0.00910534	0.00277263	0.00869017	0.00106592	Eukaryota	Alveolata	Dinoflagellata	Dinophyceae	Dinophyceae_unclassified	Dinophyceae_unclassified	Dinophyceae_unclassified
OTU_23006	3e-05	0	0.0014482	0.00220398	0.00440608	0.00414679	0.00222408	0.00201481	0	0	0	0.000276651	0.000569663	0.00121895	3.52e-05	0.000717566	0.000541352	0.000354026	0	0	0	0	3.22e-05	0	0.000314384	0.000218565	0.000624057	0.00076975	0.000155106	0.000251572	0.000110846	0.00074066	6.63e-05	0.000907045	0.000177319	0.000851977	0.000130902	Eukaryota	Alveolata	Dinoflagellata	Dinophyceae	Gymnodiniales	Gymnodiniaceae	Gyrodinium_helveticum
OTU_3239	0	2.25e-05	0.000885009	0.00211721	0.00071936	0.000720829	0	0	0	0	0	0	8.54e-05	0.000339454	0	0	0	0	0	0	0	0	0	0	0	0	0	0	0	0	2.77e-05	0	0	0	0	0	0	Eukaryota	Alveolata	Ciliophora	Spirotrichea	Strombidiida	Strombidiida_unclassified	Strombidiida_unclassified
OTU_13490	0	0	0.00120683	0.00206515	5.99e-05	0.000113389	0	0	0	0	0	0	4.27e-05	3.09e-05	0	0	0	0	0	0	0	0	0	0	1.37e-05	0.000151314	0.000138679	0.000157092	9.31e-05	0.000566038	0.000138558	0.000307103	4.42e-05	0.000296534	8.06e-05	8.52e-05	0	Eukaryota	Alveolata	Ciliophora	Spirotrichea	Spirotrichea_unclassified	Spirotrichea_unclassified	Spirotrichea_unclassified
OTU_10936	0	0	0.000864895	0.00204779	0.000329707	0.000647936	0	0	0	0	0	0	8.54e-05	0.000509181	0	0	0	0	0	0	0	0	0	0	2.73e-05	0	0	0	0	0	0	0	0	0	0	0	0	Eukaryota	Alveolata	Ciliophora	Spirotrichea	Strombidiida	Strombidiida_unclassified	Strombidiida_unclassified
OTU_4876	0	0	0.00126717	0.00199573	0.00446603	0.00411439	0.00272052	0.00256888	0	0	0	0.000276651	0.000982668	0.0015584	3.52e-05	0.00123011	0.000698519	0.000389429	3.26e-05	0	0	0	1.61e-05	0	0.000341721	0.000285815	0.000485378	0.000534113	0.000201638	0.00033543	0.000221693	0.00112002	0.000110566	0.000941932	0.000257919	0.000579345	0.000130902	Eukaryota	Alveolata	Dinoflagellata	Dinophyceae	Gymnodiniales	Gymnodiniaceae	Gyrodinium_helveticum
OTU_225	0	0	0.000703985	0.00199573	0.00734346	0.011347	0.00166806	0.00178814	1.4e-05	0	0.000111405	0.00458779	0.000669354	0.00200586	0	0.0186362	1.75e-05	0.00460234	0	0	1.83e-05	1.96e-05	0.000128673	0.000114548	0.000861138	0.00427041	0.00208019	0.000864006	0.00581648	0.000587002	0.00640137	0.0020052	0.00126045	0.00720403	0.00211171	0.00419173	0.00645161	Eukaryota	Alveolata	Dinoflagellata	Dinophyceae	Gymnodiniales	Gymnodiniales_unclassified	Gymnodiniales_unclassified
OTU_2185	0	0	0.00313776	0.00197838	5.99e-05	0	0	0	0	0	0	0.000184434	0.000199382	0.000262305	3.52e-05	6.15e-05	0	3.54e-05	0	0	0	0	0	0	0	0.000168127	1.73e-05	0	0	0.000209644	8.31e-05	0.000198714	0	0.000558182	0	0.000102237	0	Eukaryota	Alveolata	Ciliophora	Spirotrichea	Strombidiida	Strombidiida_unclassified	Strombidiida_unclassified
OTU_6767	0	0.000112415	0.00183036	0.00192631	0.00713365	0.00450316	0.00119147	0.000503702	0	0	0	0.00345813	0.000655112	0.00501466	0	0.0100459	0.00710743	0.00368187	0	1.45e-05	0	0	3.22e-05	0	0.00330786	0.00381647	0.00670862	0.00936268	0.00196985	0.00348008	0.00205066	0.0126274	0.00108354	0.0104136	0.00267591	0.0098659	0.00119682	Eukaryota	Alveolata	Dinoflagellata	Dinophyceae	Dinophyceae_unclassified	Dinophyceae_unclassified	Dinophyceae_unclassified
OTU_22470	0	2.25e-05	0.0026148	0.00189161	0.00101909	0.000882813	0.000417014	0.000277036	0	0	0.000111405	0.000276651	0.000939943	0.00103379	3.52e-05	0.000205019	8.73e-05	0.000194714	0	0	0	0	0	0	0.000136689	0.000151314	0.000156014	0.00039273	7.76e-05	0.000524109	0.000859059	0.000343233	0.000552828	0.000244205	0.000677037	0.000306712	0.000187003	Eukaryota	Alveolata	Dinoflagellata	Dinophyceae	Gymnodiniales	Gymnodiniaceae	Gymnodiniaceae_unclassified
OTU_289	0	0	0.0014482	0.00189161	0.000929173	0.0020005	0	0	0	0	2.79e-05	0	0	0	3.52e-05	0	0	0	0	0	0	0	0	0	0	0	0	0	0	0	0	0	0	0	0	0	0	Eukaryota	Hacrobia	Katablepharidophyta	Katablepharidaceae	Katablepharidales	Katablepharidales_X	Katablepharidales_XX_sp.
OTU_5513	0	0	0.00154877	0.0018569	0.00245781	0.00315869	0.000476588	0.000352592	0	0	0	0.00179823	0.000697837	0.000956642	3.52e-05	0.00510497	3.49e-05	0.00123909	0	0	0	0	0	2.86e-05	0.000150357	0.00107601	0.000554718	0.000219929	0.00153555	0.000440252	0.00210608	0.000596141	0.000464376	0.00197108	0.000693157	0.000869017	0.00198224	Eukaryota	Alveolata	Dinoflagellata	Dinophyceae	Gymnodiniales	Gymnodiniales_unclassified	Gymnodiniales_unclassified
OTU_6882	0	0	0.0017499	0.00178748	0.00182837	0.0010529	0.000198578	0.000226666	0	0	0.000250661	0.000207488	0.00101115	0.000972072	0	0.000287026	0.000104778	0.000247818	6.52e-05	0	0	0	0	0	1.37e-05	0.000117689	0.000242689	0.000219929	0.000155106	0.00033543	0.000637366	0.000162584	0.000442263	0.000209318	0.000386878	0.000306712	7.48e-05	Eukaryota	Alveolata	Dinoflagellata	Dinophyceae	Gymnodiniales	Gymnodiniaceae	Gymnodiniaceae_unclassified
OTU_3123	0	0	0.000502846	0.00178748	0.00080928	0.000923309	0	0	0	0	0	6.92e-05	0.000170899	0.000231446	1.76e-05	0	0	0	0	0	0	0	0	0	2.73e-05	0.000168127	3.47e-05	7.85e-05	0.000108574	0.000587002	0.000249404	0.00117422	0	0.000802386	0.000145079	0.000204475	0	Eukaryota	Alveolata	Ciliophora	Spirotrichea	Spirotrichea_unclassified	Spirotrichea_unclassified	Spirotrichea_unclassified
OTU_21431	0	4.5e-05	0.00100569	0.00177013	0.00446603	0.00258364	0.000814171	0.000352592	0	0	0	0.00133715	0.00045573	0.00307051	1.76e-05	0.00567902	0.00422604	0.00251359	0	0	0	0	1.61e-05	1.43e-05	0.00174961	0.00215202	0.00416038	0.0054668	0.000884105	0.00243187	0.00108075	0.00821953	0.000619168	0.00587835	0.00125735	0.0053845	0.000673212	Eukaryota	Alveolata	Dinoflagellata	Dinophyceae	Dinophyceae_unclassified	Dinophyceae_unclassified	Dinophyceae_unclassified
OTU_1063	0	0	0.000905123	0.00168336	0.00026976	0.000113389	0	0	0	0	2.79e-05	0.00043803	0.00125326	0.00132696	3.52e-05	0.000225521	0	0.000123909	0	0	0	0	1.61e-05	0	0	5.04e-05	3.47e-05	0	0	8.39e-05	5.54e-05	0.000794855	0	0.00104659	0	6.82e-05	0	Eukaryota	Alveolata	Ciliophora	Spirotrichea	Strombidiida	Tontoniidae_A	Tontoniidae_A_unclassified
OTU_3336	0.0163605	0.0382211	0.000462618	0.00164865	0	0	0	0	0.0097177	0.0203145	0.000640579	0.000253596	0	0	0	0	5.24e-05	0	0.000195612	0.145209	1.83e-05	0	0	0	0	0	0	0	0	0	0	0	0	0	0	0	0	Eukaryota	Alveolata	Ciliophora	Spirotrichea	Choreotrichida	Strobilidiidae_C	Strobilidiidae_C_X_sp.
OTU_2309	5.99e-05	2.25e-05	0.00150854	0.00163129	0.00305728	0.00352315	0.00204536	0.00143555	0	0	0.000167108	0.000253596	0.00135295	0.00121895	0.000140944	0.00151714	8.73e-05	0.000212416	0	0	0	0	3.22e-05	8.59e-05	0.000246039	0.000269003	0.000346699	0.000172801	0.000310212	0.000398323	0.00052652	0.000307103	0.000574941	0.000348864	0.00114452	0.00037487	0.00181393	Eukaryota	Alveolata	Dinoflagellata	Dinophyceae	Dinophyceae_unclassified	Dinophyceae_unclassified	Dinophyceae_unclassified
OTU_332	0	2.25e-05	0.000945351	0.00163129	0.00122891	0.00429257	0.000218436	0.00115851	0	0	0	0.000806898	0.000213623	0.000509181	0	0.000451041	0.000331797	0	0	0	0	0	0	0	1.37e-05	3.36e-05	3.47e-05	4.71e-05	3.1e-05	2.1e-05	8.31e-05	7.23e-05	0	0.00139545	4.84e-05	6.82e-05	0	Eukaryota	Alveolata	Ciliophora	CONThreeP	CONThreeP_X	CONThreeP_XX	Askenasia_sp.
OTU_5597	0	0	0.00106603	0.00159658	8.99e-05	0.000121488	0	0	0	0	0.000612728	0.00059941	0.00319011	0.00305508	0.000105708	0.000348532	6.99e-05	0.00026552	0	0	0	0	0	0	0	0.000117689	5.2e-05	0	1.55e-05	0.000293501	0	0.000686466	0	0.000750057	0	0.000187435	1.87e-05	Eukaryota	Alveolata	Ciliophora	Spirotrichea	Strombidiida	Tontoniidae_A	Laboea_strobila
OTU_6369	0	0	0.00114649	0.00152717	0.00407637	0.00242976	0.00115175	0.000629628	0	0	2.79e-05	0.00142936	0.000384522	0.00251504	0	0.00492045	0.00389424	0.00159312	0	0	0	0	4.83e-05	2.86e-05	0.00194098	0.00179895	0.00348432	0.00474418	0.000961658	0.00197065	0.000748213	0.00635884	0.000508602	0.00453523	0.00103168	0.00477107	0.000467508	Eukaryota	Alveolata	Dinoflagellata	Dinophyceae	Gymnodiniales	Gymnodiniaceae	Gyrodinium_unclassified
OTU_142	0	0	0.000864895	0.00152717	5.99e-05	0.000445456	7.94e-05	5.04e-05	0	0	0	0	0.0017802	0.00152754	0.00017618	0.00127112	0.000227019	5.31e-05	0	0	0	0	0	0	0	0	6.93e-05	0	4.65e-05	6.29e-05	0	0.000126454	0	0	0	0	0	Eukaryota	Alveolata	Dinoflagellata	Dinophyceae	Peridiniales	Protoperidiniaceae	Protoperidinium_sp.
OTU_3493	0	0	0.000482732	0.00152717	0.000659413	0.000656035	0	0	0	0	5.57e-05	2.31e-05	0.000327556	0.00052461	0	0	0	0	0	0	0	0	0	0	0	5.04e-05	6.93e-05	7.85e-05	7.76e-05	0.000398323	0.000138558	0.00101163	0	0.000872159	9.67e-05	0.000102237	0	Eukaryota	Alveolata	Ciliophora	Spirotrichea	Strombidiida_F	Strombidiida_F_X	Strombidiida_F_XX_sp.
OTU_844	0	0	0.00195104	0.00150981	0.000479573	0.000145786	1.99e-05	0	0	0	0	0.000461084	0	0.000154297	0	0.000164015	1.75e-05	0.000318624	0	0	0	0	0	0	0.00252874	0.00232015	0.00202819	0.00234067	0.00139595	0.000398323	0.000415674	0.000686466	0	0.00111636	0.000419118	0.000920136	1.87e-05	Eukaryota	Alveolata	Dinoflagellata	Dinophyceae	Gymnodiniales	Gymnodiniaceae	Gyrodinium_unclassified
OTU_1949	0	2.25e-05	0.00191081	0.00150981	0.0017984	0.0010367	1.99e-05	2.52e-05	0	0	0	0	0.000156657	0.000138867	0	0	0	5.31e-05	0	0	0	0	0	0	0	0	1.73e-05	1.57e-05	1.55e-05	0	0	1.81e-05	2.21e-05	0	4.84e-05	1.7e-05	1.87e-05	Eukaryota	Hacrobia	Cryptophyta	Cryptophyceae	Cryptophyceae_X	Cryptomonadales	Plagioselmis_prolonga
OTU_228	0	4.5e-05	0.00185047	0.00150981	0.00131883	0.00125538	0.000893602	0.00163703	0	0	0	0.00242069	0.000156657	0.000447462	0	0.000143513	0.000122241	0.000194714	0	0	3.66e-05	3.91e-05	4.83e-05	1.43e-05	0.000765456	0.00141226	0.000658727	0.00078546	0.000403276	0.000440252	8.31e-05	0.00126454	2.21e-05	0.00183153	0.000274039	0.00102237	9.35e-05	Eukaryota	Alveolata	Dinoflagellata	Dinophyceae	Gymnodiniales	Gymnodiniaceae	Gyrodinium_helveticum
OTU_768	0	0	0.00215218	0.0014404	0.0226299	0.0138415	9.93e-05	0.00010074	0	0	0.000417769	0.000553301	0.00165202	0.00120352	0.00139182	0.000451041	0.00099539	0.000424831	0	0	0	1.96e-05	0.000128673	8.59e-05	0.000560423	0.000134501	0.000554718	0.000251347	0.000822062	0.00610063	0.00088677	0.00177036	0.0025209	0.00139545	0.00106392	0.00177211	0.00059841	Eukaryota	Archaeplastida	Chlorophyta	Mamiellophyceae	Mamiellales	Mamiellaceae	Micromonas polaris
OTU_8783	0	4.5e-05	0.00179013	0.0014404	0.00125888	0.00117438	1.99e-05	0	0	0	0	4.61e-05	0.000256348	3.09e-05	0	2.05e-05	0	5.31e-05	0	0	0	0	0	0	0	0	0	1.57e-05	1.55e-05	8.39e-05	0	0	0	1.74e-05	3.22e-05	3.41e-05	0	Eukaryota	Hacrobia	Cryptophyta	Cryptophyceae	Cryptophyceae_X	Cryptomonadales	Plagioselmis_prolonga
OTU_2633	0	0	0.000623529	0.00142304	0.000209813	4.86e-05	0	0	0	0	0	0	0.000142416	0.000138867	0	0	0	0	0	0	0	0	0	0	0	0	1.73e-05	0	0	0.000146751	2.77e-05	0.000686466	0	0.000401193	0	0	0	Eukaryota	Alveolata	Ciliophora	Spirotrichea	Strombidiida	Tontoniidae_A	Tontoniidae_A_X_sp.
OTU_345	0	0	0.00289639	0.00140569	3e-05	6.48e-05	1.99e-05	0	0	0	0	0.000253596	0.000128174	6.17e-05	0	0	1.75e-05	7.08e-05	0	0	0	3.91e-05	0.000820292	0.000171821	0.00106617	0.00250509	0.00121345	0.00193223	0.00167515	0.000649895	0.000969905	0.000632271	0.000221131	0.000226761	0.000193439	0.000357831	0.000149603	Eukaryota	Alveolata	Dinoflagellata	Dinophyceae	Peridiniales	Peridiniales_unclassified	Peridiniales_unclassified
OTU_34	0.0174992	0.0180988	0.000824668	0.00137098	0	0.000639837	0	0	0.00320195	0.00655308	0.011976	0.00108355	2.85e-05	3.09e-05	3.52e-05	0	0	0	0.00117367	0.000941033	0.0219281	0.00322827	1.61e-05	0	2.73e-05	0	0	0	6.2e-05	2.1e-05	0	0	0	0	0	1.7e-05	0	Eukaryota	Hacrobia	Katablepharidophyta	Katablepharidaceae	Katablepharidales	Katablepharidales_X	Katablepharidales_XX_sp.
OTU_1026	0.0671501	0.077499	0.000442505	0.00135363	0	0	0	0	0.000769026	0	0	0	0	0	0	0	0	0	0.00394484	0	0.000951806	0	0	1.43e-05	0	0	0	0	0	0	0	0	0	0	0	0	0	Eukaryota	Alveolata	Ciliophora	Spirotrichea	Tintinnida	Tintinnidiidae	Tintinnidium_sp.
OTU_1478	0	0	0.00164934	0.00133627	0.000239787	0.00129587	0	7.56e-05	0	0	0.000139256	0.000714681	0.00128174	0.000493751	0.00123326	0.000369034	0.000977927	0.000283221	0	0	0	0	0	0	0	0	0	1.57e-05	0	8.39e-05	2.77e-05	3.61e-05	0.000176905	0.000104659	3.22e-05	6.82e-05	1.87e-05	Eukaryota	Stramenopiles	Ochrophyta	Bacillariophyta	Bacillariophyta_X	Polar-centric-Mediophyceae	Chaetoceros_decipiens
OTU_3773	0	0	0.00136774	0.00133627	0.00125888	0.000745126	0.000814171	0.000478517	0	0	8.36e-05	0.000253596	0.000683595	0.000663478	0	0.00032803	3.49e-05	0.00026552	0	0	1.83e-05	0	0	0	1.37e-05	0.000134501	0.000260024	0.000267056	9.31e-05	0.000272537	0.000387962	0.000216779	0.000243244	0.000226761	0.000306279	0.000153356	0.000149603	Eukaryota	Alveolata	Dinoflagellata	Dinophyceae	Dinophyceae_unclassified	Dinophyceae_unclassified	Dinophyceae_unclassified
OTU_5825	0	0	0.000502846	0.00133627	0.000749333	0.00080992	0	0	0	0	2.79e-05	0	9.97e-05	0.000246875	3.52e-05	2.05e-05	0	0	0	0	0	0	0	0	0	0.000117689	5.2e-05	0.000125674	0.000139595	0.000398323	0.000193981	0.00151745	6.63e-05	0.000802386	0.00011284	0.000119277	3.74e-05	Eukaryota	Alveolata	Ciliophora	Spirotrichea	Spirotrichea_unclassified	Spirotrichea_unclassified	Spirotrichea_unclassified
OTU_700	0	0	0.00215218	0.00131892	0.000149867	0.000129587	5.96e-05	5.04e-05	0	0	0	0.000138325	1.42e-05	4.63e-05	1.76e-05	2.05e-05	0	1.77e-05	0	0	0	0	0	0	0.000382728	0.000285815	0.000190684	0.000235638	0.000217149	0.000167715	0.000471097	1.81e-05	0.000199018	0.000191875	0.000145079	0.000136316	3.74e-05	Eukaryota	Alveolata	Dinoflagellata	Dinophyceae	Gymnodiniales	Gymnodiniaceae	Gymnodiniaceae_unclassified
OTU_402	0.00961855	0.0050362	0.000965465	0.00131892	0	0	0	0	0.000503363	0.00262123	0.000334215	0	0	0	0	0	0	0	0	0.00136088	3.66e-05	0	0	0	0	0	0	0	0	0	0	0	0	0	0	0	0	Eukaryota	Stramenopiles	Ochrophyta	Chrysophyceae	Chrysophyceae_X	Chrysophyceae_Clade-D	Chrysophyceae_Clade-D_X_sp.
OTU_342	0.0152818	0.0121408	0.000402277	0.00130156	0	0	0	0	0	0	0	0	0	0	1.76e-05	0	0	0	0	7.24e-05	0	0	0	0	0	0	0	0	0	0	0	0	0	0	0	0	0	Eukaryota	Alveolata	Dinoflagellata	Dinophyceae	Dinophyceae_unclassified	Dinophyceae_unclassified	Dinophyceae_unclassified
OTU_1245	0	0	0.00128729	0.00128421	8.99e-05	0.000226778	0	0	0	0	0	4.61e-05	1.42e-05	6.17e-05	0	0	0	0	0	0	0	0	9.65e-05	0	0.000246039	0.00057163	0.000416038	0.000141383	0.000124085	0.000649895	0.000775924	0.000704531	6.63e-05	0.000610511	0.000467478	0.000187435	1.87e-05	Eukaryota	Alveolata	Ciliophora	Spirotrichea	Strombidiida	Strombidiida_unclassified	Strombidiida_unclassified
OTU_7975	0	0	0.00295673	0.00126686	0.00125888	0.00647126	0	5.04e-05	0	0	0.000111405	0.000691627	0.00240683	0.000509181	0.00133897	0.0010866	0.00106524	0.000159312	0	0	0	0	0	0	0	1.68e-05	0	0	3.1e-05	0	0	0	0	3.49e-05	0	0	1.87e-05	Eukaryota	Stramenopiles	Ochrophyta	Bacillariophyta	Bacillariophyta_X	Polar-centric-Mediophyceae	Chaetoceros_decipiens
OTU_899	0	0	0.00134763	0.00126686	0.000419627	0.000413059	0.000436872	0.000478517	0	4.85e-05	0.000974795	0.00368868	0.00999758	0.00641876	0.000687104	0.00184517	0.00249721	0.0133114	0	0	0	0.000234783	0.00326508	0.00126002	0.00340355	0.00467392	0.00559918	0.0097397	0.00553729	0.0087631	0.00701103	0.00820146	0.00462164	0.00282579	0.00423954	0.00415765	0.00405797	Eukaryota	Eukaryota_unclassified	Eukaryota_unclassified	Eukaryota_unclassified	Eukaryota_unclassified	Eukaryota_unclassified	Eukaryota_unclassified
OTU_7822	0.012615	0.0206844	0.00106603	0.00126686	0	0	0	0	0	0	0	0	0	0	0	0	0	0	0	0	0	0	0	0	0	0	0	0	0	0	0	0	0	0	0	0	0	Eukaryota	Opisthokonta	Choanoflagellida	Choanoflagellatea	Craspedida	Monosigidae_Group_A	Monosiga_ovata
OTU_421	3e-05	2.25e-05	0.00110626	0.0012495	0.00206816	0.00338546	0.000675166	0.000428147	0	0	0.00022281	0.00242069	0.00516969	0.00430489	0.00139182	0.00405937	0.00082076	0.00189404	9.78e-05	0	0	0	0.00019301	1.43e-05	0.000191364	0.000891071	0.000589388	0.000549822	0.0039397	0.000985325	0.00252175	0.000343233	0.000906638	0.00113381	0.000951076	0.00178915	0.00155213	Eukaryota	Alveolata	Dinoflagellata	Dinophyceae	Dinophyceae_unclassified	Dinophyceae_unclassified	Dinophyceae_unclassified
OTU_258	0	0	0.000844781	0.0012495	0.0121692	0.00465704	0.000595735	0.000906664	0	0	0.000473472	0.000576356	0.00138143	0.00163555	0.00258985	0.000512547	0.00228765	0.00182324	0	0	0	1.96e-05	0.000241262	0.000214777	0.000943151	0.000588443	0.00234022	0.00105252	0.00215598	0.00689727	0.0033531	0.00341426	0.00506391	0.00226761	0.00293383	0.00333975	0.00177653	Eukaryota	Archaeplastida	Chlorophyta	Mamiellophyceae	Mamiellales	Bathycoccaceae	Bathycoccus_prasinos
OTU_108	0	4.5e-05	0.000663757	0.00123215	0.0193328	0.0128372	0.000158863	0.000579258	0	0	0	0.000207488	0.0142416	0.0139793	0.000440451	0.00520748	0.00129226	1.77e-05	0	0	1.83e-05	0	0	0	0.000164026	0.000739757	3.47e-05	0.000235638	0	0.000293501	0.000360251	0.000505817	0	0.000209318	0	0.000187435	1.87e-05	Eukaryota	Eukaryota_unclassified	Eukaryota_unclassified	Eukaryota_unclassified	Eukaryota_unclassified	Eukaryota_unclassified	Eukaryota_unclassified
OTU_1383	0	0	0.000563188	0.00123215	0.00026976	0.00050215	0.00274038	0.00269481	0	0	2.79e-05	0.000576356	4.27e-05	0.000169727	0	4.1e-05	0	8.85e-05	0	0	1.83e-05	0	1.61e-05	0	2.73e-05	0.000538005	0.00164682	0.000879715	0.000946147	0.000419287	0.001441	0.00108389	0.000132679	0.00495386	0.00117676	0.00422581	0.00166433	Eukaryota	Alveolata	Ciliophora	Spirotrichea	Strombidiida	Strombidiida_unclassified	Strombidiida_unclassified
OTU_2864	0.00749109	0.0114439	0.000482732	0.00123215	0	0	0	0	0	0	2.79e-05	0	0	0	0	0	0	0	0	0	9.15e-05	3.91e-05	0	0	0	0	0	0	0	0	0	0	0	0	0	0	0	Eukaryota	Opisthokonta	Choanoflagellida	Choanoflagellatea	Craspedida	Monosigidae_Group_A	Monosiga_ovata
OTU_545	0	0	0.00170968	0.00121479	8.99e-05	0	0	0	0	0	2.79e-05	0.000322759	0.000242107	0.000308594	0	0	1.75e-05	3.54e-05	0	0	0	0	0	0	0	0.000134501	1.73e-05	0	0	0.000188679	2.77e-05	0.000108389	0	0.000470966	0	3.41e-05	0	Eukaryota	Alveolata	Ciliophora	Spirotrichea	Strombidiida	Tontoniidae_A	Tontoniidae_A_X_sp.
OTU_3887	0	0	0.00108615	0.00116273	0.00164853	0.00173323	0.00121133	0.000805924	0	0	0.000111405	0.000507193	0.000655112	0.000786916	0	0.00174266	3.49e-05	0.000513338	3.26e-05	0	0	1.96e-05	8.04e-05	1.43e-05	0.000464741	0.00050438	0.000364033	0.000204219	0.000837573	0.000733753	0.00127473	0.000361298	0.000398036	0.000662841	0.000402998	0.000477107	0.000953717	Eukaryota	Alveolata	Dinoflagellata	Dinophyceae	Gymnodiniales	Gymnodiniales_unclassified	Gymnodiniales_unclassified
OTU_104	0	0	0.00026148	0.00116273	0.000209813	0.000161984	0.000139005	0.00138518	0	0	0	0	0	0	0	0	0	1.77e-05	0	0	0	0	0	0	0	0	3.47e-05	0	0	6.29e-05	0	0	6.63e-05	0	3.22e-05	0	3.74e-05	Eukaryota	Alveolata	Ciliophora	Spirotrichea	Choreotrichida	Leegaardiellidae_B	Leegaardiella_sp.
OTU_3835	0	0	0.00249412	0.00114538	0	7.29e-05	0	0	0	0	0	6.92e-05	2.85e-05	0.000108008	0	2.05e-05	0	3.54e-05	0	0	0	0	1.61e-05	0	6.83e-05	0.000235377	0.000190684	0.000125674	7.76e-05	0.000293501	2.77e-05	5.42e-05	8.85e-05	0.000191875	8.06e-05	0.000170395	5.61e-05	Eukaryota	Alveolata	Ciliophora	Spirotrichea	Strombidiida	Strombidiidae_R	Strombidium_R_unclassified
OTU_2132	0	0	0.000724098	0.00114538	0.000419627	0.000534547	0	0	0	0	0	0	4.27e-05	0.000169727	0	0	0	0	0	0	0	0	0	0	0	0	1.73e-05	3.14e-05	0	6.29e-05	0	0.000397428	0	0.000366307	1.61e-05	1.7e-05	0	Eukaryota	Alveolata	Ciliophora	Spirotrichea	Strombidiida_G	Strombidiida_G_X	Strombidiida_G_XX_sp.
OTU_1242	3e-05	0	0.000683871	0.00114538	0.00116896	0.00124728	0.0050836	0.0054148	2.8e-05	0	0.000250661	0.00129104	0.000882977	0.00192871	0.000317125	0.00133262	0.00104778	0.00116829	0	0	0	0	1.61e-05	0	9.57e-05	0.000420316	0.00277359	0.000298475	0.000899615	0.000314465	0.000997617	0.000343233	0.00316218	0.000505852	0.00264367	0.00124389	0.00437588	Eukaryota	Alveolata	Dinoflagellata	Dinophyceae	Dinophyceae_unclassified	Dinophyceae_unclassified	Dinophyceae_unclassified
OTU_934	0	0	0.00100569	0.00112802	0.000239787	0.000850416	0	0.000125926	0	0	0.000473472	0.00147547	0.000526938	0.000401173	0.000916138	0.00100459	0.000785834	0.00107978	0	0	0	5.87e-05	8.04e-05	4.3e-05	0.000765456	0.00176533	0.00128279	0.00108393	0.00195434	0.00477987	0.00121931	0.00130067	0.00322852	0.00169199	0.000854356	0.00218106	0.00293595	Eukaryota	Stramenopiles	Ochrophyta	Bacillariophyta	Bacillariophyta_X	Polar-centric-Mediophyceae	Chaetoceros_unclassified
OTU_22513	0	0	0.000885009	0.00112802	0.00263765	0.00292381	0.000714881	0.000881479	0	0	5.57e-05	0.00016138	0.00105388	0.0011418	0.000123326	0.0021732	0.000279408	7.08e-05	0	0	0	0	0	0	8.2e-05	0.000134501	0.000138679	6.28e-05	9.31e-05	0.000104822	0.000110846	0.000162584	0.000110566	0.000226761	8.06e-05	0.000272633	0.000224404	Eukaryota	Alveolata	Dinoflagellata	Dinophyceae	Dinophyceae_unclassified	Dinophyceae_unclassified	Dinophyceae_unclassified
OTU_1192	0.0188176	0.0129952	0.000362049	0.00111067	0	0	0	0	0.00233504	0.00847046	0.000919092	6.92e-05	1.42e-05	0	0	0	0	0	0.00358622	0.00655828	0.000439295	0.000117392	0	0	0	0	0	0	0	0	0	0	0	0	0	0	0	Eukaryota	Stramenopiles	Ochrophyta	Chrysophyceae	Chrysophyceae_X	Chrysophyceae_XX	Chrysophyceae_XXX_sp.
OTU_2334	0	2.25e-05	0.000965465	0.00109331	0.00143872	0.00131207	0.00045673	0.000251851	0	0	0	0.000945223	0.000427247	0.00180528	0	0.00307528	0.00279408	0.0013984	0	1.45e-05	0	1.96e-05	1.61e-05	0	0.0012712	0.00164764	0.00235755	0.00263914	0.000635935	0.000838574	0.00113617	0.00341426	0.000287471	0.00300023	0.000773757	0.00262409	0.000317906	Eukaryota	Alveolata	Dinoflagellata	Dinophyceae	Gymnodiniales	Gymnodiniaceae	Gyrodinium_helveticum
OTU_2	0.00068918	0.000247313	0.000925237	0.00109331	0.00248779	0.00318299	0.00639422	0.00475999	0	2.43e-05	0.000194959	0.00223626	0.000683595	0.00115723	0.000880902	0.00100459	0.000890612	0.00345175	0	0	1.83e-05	0	4.83e-05	1.43e-05	0.000177695	0.0023874	0.00747135	0.000989679	0.00367601	0.000712788	0.00709416	0.00108389	0.00995091	0.00245949	0.0120416	0.00443028	0.0154278	Eukaryota	Alveolata	Dinoflagellata	Dinophyceae	Peridiniales	Peridiniales_unclassified	Peridiniales_unclassified
OTU_15665	0	4.5e-05	0.00112637	0.00107596	0.00341696	0.00219488	0.000675166	0.000780738	0	0	0	0.000760789	0.000398764	0.00143496	0	0.00260374	0.00213048	0.00118599	0	0	0	0	0	0	0.00125753	0.000874258	0.00204552	0.00301616	0.00051185	0.000943396	0.000609655	0.0040646	0.000287471	0.00252926	0.000693157	0.00303304	0.000336606	Eukaryota	Alveolata	Dinoflagellata	Dinophyceae	Gymnodiniales	Gymnodiniaceae	Gyrodinium_unclassified
OTU_5814	0	0	0.000643643	0.00107596	0.0013488	0.00144166	0	0	0	0	0	0	9.97e-05	0.000154297	0	2.05e-05	0	1.77e-05	0	0	0	0	0	0	0	5.04e-05	0	3.14e-05	3.1e-05	0.000167715	0.000110846	0.0023665	0	0.000907045	9.67e-05	0.000238554	1.87e-05	Eukaryota	Alveolata	Ciliophora	Spirotrichea	Strombidiida_H	Strombidiida_H_X	Strombidiida_H_XX_sp.
OTU_1806	0	0	0.000643643	0.00105861	0.0013488	0.00164414	0	0	0	0	0	0	0.000156657	0.000478321	0	0	0	0	0	0	0	0	0	0	0	8.41e-05	8.67e-05	0	3.1e-05	0.000230608	0.000332539	0.0020594	0	0.000907045	8.06e-05	5.11e-05	5.61e-05	Eukaryota	Alveolata	Ciliophora	Spirotrichea	Spirotrichea_unclassified	Spirotrichea_unclassified	Spirotrichea_unclassified
OTU_8705	0	0	0.00120683	0.00104125	0.00035968	0.000793722	0.000198578	0.000302221	0	0	0	2.31e-05	0.000156657	7.71e-05	0	0.000102509	0	0	0	0	0	0	0	0	1.37e-05	5.04e-05	3.47e-05	7.85e-05	4.65e-05	2.1e-05	2.77e-05	5.42e-05	0	1.74e-05	1.61e-05	5.11e-05	1.87e-05	Eukaryota	Alveolata	Dinoflagellata	Dinophyceae	Dinophyceae_unclassified	Dinophyceae_unclassified	Dinophyceae_unclassified
OTU_2026	0	0	0.000925237	0.00104125	0.000119893	0.000161984	0	0	0	0	2.79e-05	0.000253596	0.000968426	0.00126524	3.52e-05	0.000123011	3.49e-05	8.85e-05	0	0	0	0	0	0	0	0	1.73e-05	0	1.55e-05	2.1e-05	2.77e-05	0.000632271	0	0.000627954	0	0.000102237	0	Eukaryota	Alveolata	Ciliophora	Spirotrichea	Strombidiida	Tontoniidae_A	Tontoniidae_A_unclassified
OTU_2027	0	0	0.00106603	0.0010239	0.00374667	0.00216249	0.000695024	0.000302221	0	0	0	0.00182128	0.000356039	0.00313223	0	0.00459242	0.00401649	0.00173473	0	0	0	0	3.22e-05	0	0.00157192	0.00179895	0.00346699	0.00458708	0.000915126	0.00165618	0.000997617	0.00787629	0.000530715	0.00463989	0.0010478	0.00519706	0.000523609	Eukaryota	Alveolata	Dinoflagellata	Dinophyceae	Dinophyceae_unclassified	Dinophyceae_unclassified	Dinophyceae_unclassified
OTU_5359	0	0	0.000482732	0.0010239	0.000119893	8.91e-05	7.94e-05	0.00010074	0	0	0	2.31e-05	1.42e-05	9.26e-05	0	2.05e-05	0	0	0	0	0	0	0	0	1.37e-05	1.68e-05	0	0	0	0	0	0	0	3.49e-05	0	0	7.48e-05	Eukaryota	Alveolata	Ciliophora	Ciliophora_X	Ciliophora_XX	Ciliophora_XXX	Mesodinium_rubrum
OTU_1377	0	2.25e-05	0.000965465	0.00100654	0.00383658	0.00246216	0.000695024	0.000251851	0	0	0	0.000829952	0.000227865	0.00177442	0	0.00315729	0.0022178	0.0013276	0	0	0	0	3.22e-05	2.86e-05	0.00151724	0.0015972	0.00289493	0.00381733	0.000791041	0.00140461	0.00102533	0.00554592	0.000265358	0.00491898	0.000902716	0.0036635	0.000430108	Eukaryota	Alveolata	Dinoflagellata	Dinophyceae	Dinophyceae_unclassified	Dinophyceae_unclassified	Dinophyceae_unclassified
OTU_860	0.0103077	0.0168623	0.000844781	0.00100654	0	0	0	0	0	0	0	0	0	0	0	0	0	0	0	0	0.000146432	3.91e-05	4.83e-05	0	0	0	0	0	0	0	0	0	0	0	0	0	0	Eukaryota	Opisthokonta	Choanoflagellida	Choanoflagellatea	Craspedida	Monosigidae_Group_A	Monosiga_ovata
OTU_3593	0	0	0.00158899	0.000989188	5.99e-05	8.91e-05	0	0	0	0	0	4.61e-05	9.97e-05	0.000154297	1.76e-05	8.2e-05	1.75e-05	0.000194714	0	0	0	0	4.83e-05	0	0.000519417	0.000588443	0.00121345	0.0010211	0.00051185	0.000251572	0.000415674	0.000180649	8.85e-05	0.000453523	0.000338519	0.00037487	7.48e-05	Eukaryota	Alveolata	Ciliophora	Spirotrichea	Strombidiida	Strombidiidae_R	Strombidium_R_unclassified
OTU_458	0	0	0.00118672	0.000989188	0.0117495	0.00621209	1.99e-05	0.00010074	0	0	0.000139256	0.000184434	0.000968426	0.000910353	0.000828048	0.000246023	0.000506426	0.000123909	0	0	0	5.87e-05	0.000128673	7.16e-05	0.000437403	0.000100876	0.000433373	0.000298475	0.000604914	0.00333333	0.000831347	0.000939374	0.00112777	0.000854716	0.000805997	0.00102237	0.000336606	Eukaryota	Archaeplastida	Chlorophyta	Mamiellophyceae	Mamiellales	Mamiellaceae	Micromonas polaris
OTU_1526	0	0	0.00102581	0.000989188	0.000209813	0.00040496	0	0.00010074	0	0	0.000696282	0.00142936	0.000128174	0.000324024	0.000528541	0.000799574	0.00200824	0.00187634	0	0	0	0	0	0	0	0	0	0	0	2.1e-05	0	1.81e-05	2.21e-05	1.74e-05	0	0	0	Eukaryota	Stramenopiles	Ochrophyta	Bacillariophyta	Bacillariophyta_X	Polar-centric-Mediophyceae	Chaetoceros_sp.
OTU_1879	0	0	0.000422391	0.000989188	0.000149867	0.000753226	0	0	0	0	0	4.61e-05	9.97e-05	0.000200586	0.000158562	0.000512547	5.24e-05	0	0	0	0	0	0	0	0	0.000117689	0	6.28e-05	0	0	0	0	0	0	0	0	0	Eukaryota	Alveolata	Dinoflagellata	Dinophyceae	Gonyaulacales	Goniodomataceae	Alexandrium_unclassified
OTU_1358	0	0	0.000703985	0.000971834	0.00353685	0.0040577	0.00373327	0.00392888	0	2.43e-05	5.57e-05	0.000115271	0.0017802	0.00223731	0.000299507	0.00182467	0.00242735	0	0	0	0	0	0	0	4.1e-05	0.000453942	0.000294694	0.000659786	0.00051185	0.000649895	0.00121931	0.00084905	0.00035381	0.00120358	0.000435238	0.00134612	0.000916316	Eukaryota	Alveolata	Dinoflagellata	Dinophyceae	Torodiniales	Torodiniaceae	Torodinium_robustum
OTU_21444	0	0	0.000623529	0.000971834	0.00245781	0.00264034	0.000397156	0.000453332	0	0	0.000139256	0.00016138	0.0010966	0.00103379	0.000123326	0.00194768	0.000122241	5.31e-05	0	0	0	0	0	0	2.73e-05	3.36e-05	8.67e-05	3.14e-05	6.2e-05	0.000125786	8.31e-05	9.03e-05	2.21e-05	0.000209318	8.06e-05	8.52e-05	9.35e-05	Eukaryota	Alveolata	Dinoflagellata	Dinophyceae	Dinophyceae_unclassified	Dinophyceae_unclassified	Dinophyceae_unclassified
OTU_22819	0	0	0.00118672	0.00095448	0.000239787	0.000145786	0	0	0	0	8.36e-05	2.31e-05	0.00128174	0.000416602	0	2.05e-05	0	8.85e-05	0	0	1.83e-05	0.000156522	0.000627282	0.00018614	0.000423735	0.000941509	0.000520048	0.000801169	0.000573893	0.00129979	0.000831347	0.00220392	4.42e-05	0.000209318	1.61e-05	0.000289672	0.000112202	Eukaryota	Alveolata	Dinoflagellata	Dinophyceae	Dinophyceae_unclassified	Dinophyceae_unclassified	Dinophyceae_unclassified
OTU_552	0	0	0.000905123	0.00095448	0.00605461	0.0118896	0.00214464	0.00156148	0	0	0.00158752	0.0254288	0.0356751	0.0296405	0.0122093	0.0251763	0.00398156	0.015524	0.000358622	0	5.49e-05	0	0.00231612	1.43e-05	0.00128487	0.00976815	0.0065006	0.00397443	0.0436469	0.00492662	0.0224741	0.00455235	0.0095971	0.0107624	0.00751189	0.0199192	0.0157644	Eukaryota	Alveolata	Dinoflagellata	Dinophyceae	Gymnodiniales	Gymnodiniaceae	Gyrodinium_fusiforme
OTU_2733	0	0	0.000462618	0.000937126	0.00365674	0.00685192	0.00133047	0.000856294	0	0	8.36e-05	0.00419587	0.000142416	0.00128067	1.76e-05	0.0135722	3.49e-05	0.00320394	0	0	0	0	6.43e-05	0	0.000191364	0.00230333	0.00107477	0.000596949	0.0032107	0.000125786	0.00379649	0.00110196	0.000574941	0.00354097	0.001209	0.00240258	0.00417017	Eukaryota	Alveolata	Dinoflagellata	Dinophyceae	Gymnodiniales	Gymnodiniales_unclassified	Gymnodiniales_unclassified
OTU_3277	0	0.000247313	0.00102581	0.000919772	0.00377664	0.00240546	0.000933317	0.000402962	0	0	0	0.00149852	0.000356039	0.00203672	0	0.00356733	0.00289885	0.00203565	0	0	0	0	4.83e-05	0	0.00147624	0.00201752	0.00249623	0.0037545	0.001458	0.00140461	0.001441	0.00514849	0.000906638	0.00457011	0.00214395	0.00434509	0.000991117	Eukaryota	Alveolata	Dinoflagellata	Dinophyceae	Dinophyceae_unclassified	Dinophyceae_unclassified	Dinophyceae_unclassified
OTU_6097	0	0	0.000844781	0.000902417	0.00173845	0.00136067	0.000337583	0.000251851	0	0	0	0.00101439	0.000356039	0.00138868	0	0.00291127	0.00251467	0.00123909	0	0	0	0	1.61e-05	0	0.00102516	0.000958321	0.00175083	0.00249776	0.000542871	0.000985325	0.000360251	0.00287232	0.00035381	0.00256415	0.00103168	0.00255593	0.000336606	Eukaryota	Alveolata	Dinoflagellata	Dinophyceae	Dinophyceae_unclassified	Dinophyceae_unclassified	Dinophyceae_unclassified
OTU_825	0.000629251	0.000831872	0.00142808	0.000885063	0.00254773	0.00371753	0.00353469	0.00299703	0	0	2.79e-05	0.000507193	0.000313314	0.000416602	0.000546159	0.000246023	0.000558815	0.000159312	0	0	0	0	0	0	0	0.00025219	0.000329364	0.000172801	0.000124085	0.000188679	0.00088677	0.000307103	0.000928751	0.000209318	0.00232127	0.000920136	0.00452548	Eukaryota	Alveolata	Dinoflagellata	Dinophyceae	Dinophyceae_unclassified	Dinophyceae_unclassified	Dinophyceae_unclassified
OTU_6999	0	0	0.00108615	0.000885063	0	8.91e-05	0	2.52e-05	0	0	0	6.92e-05	0	1.54e-05	0	4.1e-05	0	0	0	0	0	0	0	0	0	0.000184939	0.000277359	0.000125674	0.000108574	0	0.000110846	1.81e-05	2.21e-05	0.000104659	0.00011284	0.000136316	0.000112202	Eukaryota	Alveolata	Dinoflagellata	Dinophyceae	Dinophyceae_unclassified	Dinophyceae_unclassified	Dinophyceae_unclassified
OTU_11435	0	0	0.000985578	0.000885063	0.000119893	9.72e-05	0	2.52e-05	0	0	0	0.000184434	5.7e-05	7.71e-05	1.76e-05	4.1e-05	0	8.85e-05	0	0	0	0	4.83e-05	0	0.00035539	0.000622068	0.000953421	0.000832587	0.000465318	0.000293501	0.000443385	0.000162584	8.85e-05	0.00038375	0.000322399	0.000357831	0.000130902	Eukaryota	Alveolata	Ciliophora	Spirotrichea	Strombidiida	Strombidiidae_R	Strombidium_R_unclassified
OTU_6010	0	0	0.00183036	0.000867709	0.000209813	0.000129587	1.99e-05	2.52e-05	0	0	0	0	0	0	0	0	0	0	0	0	0	0	0	0	1.37e-05	1.68e-05	0	0	6.2e-05	0	0	0	0	1.74e-05	0	0	0	Eukaryota	Hacrobia	Cryptophyta	Cryptophyceae	Cryptophyceae_X	Cryptomonadales	Teleaulax_amphioxeia
OTU_11512	0	0	0.000804554	0.000867709	0.00017984	0.000421158	0	0	0	0	2.79e-05	9.22e-05	0.000299073	0.000817775	3.52e-05	0.000164015	0	3.54e-05	0	0	0	0	0	0	0	0	1.73e-05	4.71e-05	3.1e-05	0.000377358	2.77e-05	0.000108389	0	0.000313977	3.22e-05	0.000170395	1.87e-05	Eukaryota	Alveolata	Ciliophora	Spirotrichea	Strombidiida_G	Strombidiida_G_X	Strombidiida_G_X_unclassified
OTU_86	0	0	0.000402277	0.000867709	0.00107904	0.00148215	0.00712896	0.00526369	0	0	0.000362067	0.00712375	0.0140707	0.0245178	0.0101128	0.0427874	0.00799804	0.00253129	0	0	0	0	0	0	0	0	0	1.57e-05	0	0	0	0	0	0	0	0	0	Eukaryota	Alveolata	Dinoflagellata	Dinophyceae	Dinophyceae_unclassified	Dinophyceae_unclassified	Dinophyceae_unclassified
OTU_64	0.00758098	0.00804892	0.000885009	0.000850355	0	0	0	0	0	0	0.00044562	2.31e-05	0	0	0	0	0	0	0.0032602	0.000723872	0.00380722	0.00156522	0.000498609	0.000658648	4.1e-05	5.04e-05	3.47e-05	0	0	8.39e-05	0	0	0	0	0	0	0	Eukaryota	Alveolata	Alveolata_unclassified	Alveolata_unclassified	Alveolata_unclassified	Alveolata_unclassified	Alveolata_unclassified
OTU_2006	0	2.25e-05	0.000201138	0.000850355	0.000659413	0.00119058	0.0102665	0.0129955	0	0	5.57e-05	0.00154463	0.000769045	0.00128067	1.76e-05	0.000287026	1.75e-05	0.000106208	0	0	0	0	3.22e-05	0	1.37e-05	0.00025219	0.000450708	0.000377021	0.000573893	0.000524109	0.000748213	0.00231231	8.85e-05	0.00373284	0.000548078	0.00223218	0.000878915	Eukaryota	Alveolata	Ciliophora	Spirotrichea	Strombidiida	Strombidiidae_M	Strombidiidae_M_unclassified
OTU_2370	0	0	0.00160911	0.000833001	0.00035968	0.000210579	0	0	0	0	0	0.00016138	2.85e-05	3.09e-05	0	6.15e-05	0	0.00014161	0	0	0	1.96e-05	3.22e-05	0	0.000792794	0.00129458	0.00185484	0.00175943	0.000666956	0.000503145	0.000831347	0.000234844	0.000287471	0.000872159	0.000499718	0.000851977	0.000168303	Eukaryota	Alveolata	Ciliophora	Spirotrichea	Strombidiida	Strombidiidae_R	Strombidium_biarmatum
OTU_42	0.00734126	0.00492378	0.000864895	0.000833001	0	0	0	0	0.0123324	0.0266492	0.00303579	0.000230542	1.42e-05	1.54e-05	5.29e-05	0	0	0	0.00117367	0.00518292	0.000256255	5.87e-05	3.22e-05	0	0	0	0	0	0	0	0	0	0	0	0	0	0	Eukaryota	Stramenopiles	Ochrophyta	Chrysophyceae	Chrysophyceae_X	Chrysophyceae_Clade-C	Chrysophyceae_Clade-C_X_sp.
OTU_1066	0	0	0.000824668	0.000815647	0.000689386	0.000931408	1.99e-05	0	0	0	0	6.92e-05	0.00018514	0.00118809	1.76e-05	0.000410038	1.75e-05	5.31e-05	0	0	0	0	0	0	0	1.68e-05	3.47e-05	1.57e-05	1.55e-05	0.000188679	8.31e-05	0.000415492	0	0.000802386	6.45e-05	3.41e-05	3.74e-05	Eukaryota	Alveolata	Ciliophora	Spirotrichea	Strombidiida_G	Strombidiida_G_X	Strombidium_G_X_unclassified
OTU_13588	0	0	0.000603415	0.000815647	0	1.62e-05	0	0	0	0	0	2.31e-05	1.42e-05	9.26e-05	0	0	0	5.31e-05	0	0	0	0	0	0	5.47e-05	0.000117689	0.000433373	6.28e-05	9.31e-05	0.000272537	0.000193981	1.81e-05	6.63e-05	0.000122102	0.000515838	0.000187435	0.000130902	Eukaryota	Alveolata	Ciliophora	Spirotrichea	Strombidiida	Strombidiida_unclassified	Strombidiida_unclassified
OTU_5439	0	0	0.000402277	0.000815647	0.00296736	0.00524828	0.000695024	0.000705183	1.4e-05	0	8.36e-05	0.00299705	0.000128174	0.000864064	3.52e-05	0.0103535	1.75e-05	0.00201795	0	0	0	0	0	0	0.000218702	0.00189983	0.00112677	0.000549822	0.00286946	0.000167715	0.002882	0.00074066	0.000442263	0.00310489	0.00112839	0.00214698	0.00336606	Eukaryota	Alveolata	Dinoflagellata	Dinophyceae	Dinophyceae_unclassified	Dinophyceae_unclassified	Dinophyceae_unclassified
OTU_1	0.00782069	0.00415936	0.000301708	0.000780938	0	0	0	0	0.000461416	0.00174749	0.000807687	9.22e-05	1.42e-05	0	0	0	0	0	0.00146709	0.000912079	7.32e-05	9.78e-05	0	0	0	0	0	1.57e-05	0	0	0	0	0	0	0	0	0	Eukaryota	Stramenopiles	Ochrophyta	Chrysophyceae	Chrysophyceae_X	Chrysophyceae_Clade-C	Dinobryon_unclassified
OTU_826	0	0	0.000724098	0.000763584	0.00227797	0.00196001	0.00234322	0.00274518	0	0	0	0.000253596	0.000128174	0.000648048	0	0.000779072	0.000122241	0.000424831	9.78e-05	0	0.000109824	3.91e-05	0	0	0.00012302	0.000336253	0.00100543	0.000345602	0.000449808	0.000398323	0.000775924	0.000650336	0.000972978	0.000889602	0.00149915	0.000732701	0.000916316	Eukaryota	Alveolata	Dinoflagellata	Dinophyceae	Dinophyceae_unclassified	Dinophyceae_unclassified	Dinophyceae_unclassified
OTU_1290	0	0	0.000241366	0.000763584	8.99e-05	2.43e-05	9.93e-05	0.000528887	0	0	0	0	0	0	0	0	0	0	0	0	0	0	0	0	0	0	0	0	0	0	0	0	0	0	0	0	0	Eukaryota	Alveolata	Ciliophora	Spirotrichea	Choreotrichida	Strobilidiidae_A	Rimostrombidium_A_sp.
OTU_5766	0	0	0.000543074	0.00074623	5.99e-05	4.86e-05	0	0	0	0	0	0	0	3.09e-05	0	0	0	0	0	0	0	0	0	0	1.37e-05	0.000134501	6.93e-05	7.85e-05	6.2e-05	0.000272537	0.000110846	7.23e-05	0	0.000156989	4.84e-05	0	0	Eukaryota	Alveolata	Ciliophora	Spirotrichea	Spirotrichea_unclassified	Spirotrichea_unclassified	Spirotrichea_unclassified
OTU_392	0	0.000112415	0.000482732	0.00074623	3e-05	3.24e-05	0.000139005	0.000151111	0	4.85e-05	8.36e-05	0.000368868	0.0335674	0.0134701	0.173062	0.000225521	0.0147388	0.0135769	0	0	0	0	8.04e-05	1.43e-05	0.000451072	0.00181577	0.00157748	0.00482272	0.00193883	0.00358491	0.000692789	0.000867115	0.000530715	0.000122102	0.000419118	0.000238554	0.000299205	Eukaryota	Rhizaria	Cercozoa	Filosa-Thecofilosea	Cryomonadida	Cryothecomonas-lineage	Cryothecomonas_aestivalis
OTU_1424	0.00407515	0.00254058	0.000462618	0.00074623	0	0	0	0	0	0	0	0	0	0	0	0	0	0	0.00981319	0	0.00117145	0	0	0	0	0	0	0	0	0	0	0	0	0	0	0	0	Eukaryota	Alveolata	Alveolata_unclassified	Alveolata_unclassified	Alveolata_unclassified	Alveolata_unclassified	Alveolata_unclassified
OTU_4619	0	0	0.000945351	0.000728876	8.99e-05	1.62e-05	0	0	0	0	0	0.0013602	0.000156657	0.000324024	1.76e-05	6.15e-05	0	8.85e-05	0	0	0	0	0.00160841	0.000100229	0.00585027	0.00457304	0.00280826	0.000471276	0.00158208	0.00102725	0.00260489	0.000270973	0.000729733	0.000470966	0.00132183	0.000357831	0.000542309	Eukaryota	Alveolata	Ciliophora	Spirotrichea	Strombidiida	Strombidiidae_R	Strombidiidae_R_unclassified
OTU_21652	0	0	0.000683871	0.000728876	0.00188832	0.00153885	0.000754597	0.000377777	0	0	0	0.000414976	0.000213623	0.00134238	0	0.00258324	0.00153674	0.00146921	3.26e-05	0	3.66e-05	0	3.22e-05	0	0.000929482	0.00082382	0.00199352	0.002215	0.000542871	0.00100629	0.000775924	0.00321555	0.000950865	0.00216295	0.00132183	0.00296488	0.000542309	Eukaryota	Alveolata	Dinoflagellata	Dinophyceae	Dinophyceae_unclassified	Dinophyceae_unclassified	Dinophyceae_unclassified
OTU_21809	0	0	0.000563188	0.000728876	8.99e-05	0.0010124	0	0	0	0	0	6.92e-05	0.000128174	0.000246875	0.000123326	0.000410038	0	0	0	0	0	0	0	0	0	8.41e-05	0	6.28e-05	0	0	0	0	0	0	0	0	0	Eukaryota	Alveolata	Dinoflagellata	Dinophyceae	Gonyaulacales	Goniodomataceae	Alexandrium_unclassified
OTU_2042	0	0	0.000482732	0.000728876	0.00341696	0.00290761	0.000814171	0.000805924	0	0	0	0.000714681	0.000256348	0.00120352	0	0.00274725	0.00143196	0.000938169	0	0	0	0	0	0	0.000574092	0.000975134	0.00107477	0.00199507	0.000589403	0.000607966	0.000775924	0.00285425	0.00035381	0.0029479	0.000870476	0.00291376	0.000691912	Eukaryota	Alveolata	Dinoflagellata	Dinophyceae	Dinophyceae_unclassified	Dinophyceae_unclassified	Dinophyceae_unclassified
OTU_365	0	0	0.000462618	0.000728876	0.00125888	0.00287522	0.0024028	0.00191407	0	0	0.000584877	0.00170601	0.00115357	0.00359512	0.000211416	0.00207069	0.000715982	0.000690351	0	0	0	0	0	0	6.83e-05	0.000184939	0.000208019	9.43e-05	0.000170617	0.00033543	0.000138558	0.000433557	8.85e-05	0.000697727	0.000193439	0.000477107	0.000280505	Eukaryota	Alveolata	Dinoflagellata	Dinophyceae	Prorocentrales	Prorocentraceae	Prorocentrum_sp.
OTU_6903	0	8.99e-05	0.00110626	0.000694167	0.00116896	0.000850416	0.000119147	0.000151111	0	0	0	4.61e-05	9.97e-05	0.000169727	0	0.000143513	1.75e-05	5.31e-05	0	0	0	0	0	0	0	0.000117689	5.2e-05	6.28e-05	4.65e-05	0.000146751	0.000110846	0.000216779	0.000110566	0.000244205	0.000161199	0.000170395	1.87e-05	Eukaryota	Alveolata	Dinoflagellata	Dinophyceae	Dinophyceae_unclassified	Dinophyceae_unclassified	Dinophyceae_unclassified
OTU_1731	0.0117161	0.0104546	0.000120683	0.000694167	0	0	0	0	0.0140522	0.0243435	0.000111405	2.31e-05	0	0	0.000105708	0	0	0	0.000945457	0.00118715	0.000494207	5.87e-05	1.61e-05	0	0	0	0	0	3.1e-05	2.1e-05	0	0	0	0	0	0	0	Eukaryota	Alveolata	Dinoflagellata	Dinophyceae	Dinophyceae_unclassified	Dinophyceae_unclassified	Dinophyceae_unclassified
OTU_1882	0	0	0.00134763	0.000676813	0.000839253	0.000364464	1.99e-05	5.04e-05	0	0	0	0	2.85e-05	3.09e-05	0	2.05e-05	0	1.77e-05	0	0	0	0	0	0	0	0	0	0	0	0	0	0	0	0	3.22e-05	1.7e-05	0	Eukaryota	Eukaryota_unclassified	Eukaryota_unclassified	Eukaryota_unclassified	Eukaryota_unclassified	Eukaryota_unclassified	Eukaryota_unclassified
OTU_773	0	0	0.00126717	0.000676813	0.000509547	0.000834217	0	0	0	0	0	2.31e-05	0	3.09e-05	1.76e-05	0.000123011	1.75e-05	0	0	0	0	0	0	0	0	0	0	0	0	2.1e-05	0	1.81e-05	6.63e-05	3.49e-05	1.61e-05	1.7e-05	3.74e-05	Eukaryota	Stramenopiles	Ochrophyta	Bacillariophyta	Bacillariophyta_X	Polar-centric-Mediophyceae	Chaetoceros_decipiens
OTU_1137	0	0	0.000603415	0.000676813	0.000209813	0.000194381	0.000417014	0.00115851	0	0	8.36e-05	0.000414976	1.42e-05	9.26e-05	0	4.1e-05	0	0	0	0	0	0	1.61e-05	0	1.37e-05	6.73e-05	0.000242689	7.85e-05	1.55e-05	2.1e-05	0	5.42e-05	6.63e-05	0.000104659	1.61e-05	8.52e-05	0.000205704	Eukaryota	Alveolata	Dinoflagellata	Dinophyceae	Dinophyceae_unclassified	Dinophyceae_unclassified	Dinophyceae_unclassified
OTU_1724	0.00398526	0.00429426	0.00052296	0.000676813	0	0	0	0	0	0	0	0	0	0	0	0	0	0	0	0.000101342	0.000146432	1.96e-05	0	0	0	0	0	0	0	0	0	0	0	0	0	0	0	Eukaryota	Opisthokonta	Choanoflagellida	Choanoflagellida_X	Choanoflagellida_XX	Clade-2	Sphaeroeca_unclassified
OTU_5309	0	0	0.000442505	0.000676813	0.00155861	0.000980003	0.000377299	0.000151111	0	0	0	0.000484139	7.12e-05	0.00100293	0	0.00174266	0.000960464	0.000584143	0	0	0	0	1.61e-05	0	0.000683443	0.000638881	0.00121345	0.0017123	0.000294702	0.000419287	0.000332539	0.00211359	0.000199018	0.0017792	0.000789877	0.00170396	0.000168303	Eukaryota	Alveolata	Dinoflagellata	Dinophyceae	Gymnodiniales	Gymnodiniaceae	Gyrodinium_helveticum
OTU_22372	0	0	0.000703985	0.000659459	0.00263765	0.00115009	0.000556019	0.000352592	0	0	0	0.000783844	0.000299073	0.00185157	0	0.00260374	0.00192093	0.000938169	0	1.45e-05	0	0	0	0	0.00143523	0.000958321	0.00195885	0.0027334	0.000791041	0.001174	0.000609655	0.00384782	0.000199018	0.00277347	0.000805997	0.00230034	0.000448808	Eukaryota	Alveolata	Dinoflagellata	Dinophyceae	Gymnodiniales	Gymnodiniaceae	Gyrodinium_helveticum
OTU_1527	0	0	0.000543074	0.000659459	0	4.86e-05	0	0	0	0	0	0	0	4.63e-05	0	0	0	0	0	0	0	0	0	0	0	3.36e-05	3.47e-05	6.28e-05	7.76e-05	0.000251572	0.000138558	0.000162584	2.21e-05	0.000279091	3.22e-05	3.41e-05	3.74e-05	Eukaryota	Alveolata	Ciliophora	Spirotrichea	Strombidiida	Strombidiida_unclassified	Strombidiida_unclassified
OTU_245	0.00401522	0.00260803	0.000543074	0.000659459	0	0	0	0	0.00384513	0.0135673	0.00378777	0.000253596	0	0	1.76e-05	0	0	0	0.00110847	0.00328638	0.000109824	7.83e-05	0.000144757	0	1.37e-05	0	0	0	0	0	0	0	0	0	0	0	0	Eukaryota	Stramenopiles	Ochrophyta	Chrysophyceae	Chrysophyceae_X	Chrysophyceae_Clade-C	Chrysophyceae_Clade-C_unclassified
OTU_944	0	6.74e-05	0.000362049	0.000659459	0.00431616	0.00323158	0.00458716	0.00327406	0	0	5.57e-05	0.000368868	0.000484213	0.00175899	0	0.000902083	0.000296871	5.31e-05	0	0	0	0	0	0	1.37e-05	0.000554818	0.000450708	0.000377021	0.00139595	8.39e-05	0.00110846	0.00088518	0.000398036	0.000680284	0.000515838	0.00122685	0.00211314	Eukaryota	Alveolata	Dinoflagellata	Dinophyceae	Gymnodiniales	Gymnodiniaceae	Gymnodinium_sp.
OTU_3822	0	0	0.000362049	0.000659459	0.000119893	8.1e-06	0	0.00010074	0	0	2.79e-05	0	0.000199382	0.000108008	0	6.15e-05	0	5.31e-05	0	0	0	0	0	0	2.73e-05	3.36e-05	3.47e-05	9.43e-05	4.65e-05	0.000146751	0.000110846	0	8.85e-05	6.98e-05	4.84e-05	1.7e-05	7.48e-05	Eukaryota	Alveolata	Dinoflagellata	Dinophyceae	Gymnodiniales	Gymnodiniaceae	Gymnodiniaceae_unclassified
OTU_2152	0	4.5e-05	0.000703985	0.000642105	0.00215808	0.00231637	0.00528218	0.00601924	0	4.85e-05	0.000250661	0.00103744	0.00108236	0.00188243	0.000317125	0.00174266	0.000698519	0.000548741	0	0	0	0	3.22e-05	0	4.1e-05	0.000336253	0.00220154	0.000267056	0.000713488	0.000167715	0.000997617	0.000541947	0.0018575	0.000645398	0.00232127	0.00144836	0.00445068	Eukaryota	Alveolata	Dinoflagellata	Dinophyceae	Dinophyceae_unclassified	Dinophyceae_unclassified	Dinophyceae_unclassified
OTU_3312	0	0.000157381	0.000663757	0.000642105	0.00170848	0.0020248	0.00224393	0.00166222	0	0	0	0.000322759	0.000199382	0.000354884	0.000352361	0.00065606	0.0004715	5.31e-05	0	0	0	0	3.22e-05	0	1.37e-05	0.000285815	0.000277359	0.000141383	7.76e-05	0.000104822	0.000332539	0.000216779	0.000508602	0.000139545	0.00137019	0.000443028	0.00226274	Eukaryota	Alveolata	Dinoflagellata	Dinophyceae	Dinophyceae_unclassified	Dinophyceae_unclassified	Dinophyceae_unclassified
OTU_920	0	0	0.000623529	0.000642105	0.0144172	0.00673043	0.000357441	0.000554072	0	0	0.000473472	0.000391922	0.00135295	0.00163555	0.00211416	0.000553551	0.00251467	0.00161082	0	0	0	0	0.000209094	0.00018614	0.000874807	0.000453942	0.00199352	0.000801169	0.00127187	0.00775681	0.00252175	0.00316136	0.00802707	0.00197108	0.00438462	0.00313528	0.00149603	Eukaryota	Archaeplastida	Chlorophyta	Mamiellophyceae	Mamiellales	Bathycoccaceae	Bathycoccus_prasinos
OTU_22247	0	0	0.000502846	0.000642105	0.0008992	0.000818019	0.00270066	0.00458369	0	0	0.000111405	0.000829952	0.000555421	0.00135782	7.05e-05	0.000902083	0.000838223	0.000300922	0	0	0	0	0	0	1.37e-05	5.04e-05	0.00126545	0.000125674	0.000325723	6.29e-05	0.000332539	0.000144519	0.000751846	0.00038375	0.000596437	0.000579345	0.00106592	Eukaryota	Alveolata	Dinoflagellata	Dinophyceae	Dinophyceae_unclassified	Dinophyceae_unclassified	Dinophyceae_unclassified
OTU_1376	0	0	0.000462618	0.000642105	0.000209813	4.86e-05	0	0	0	0	0	2.31e-05	8.54e-05	0.000185157	0	0	0	1.77e-05	0	0	0	0	0	0	0	0	0	0	0	0	0	0.000523882	0	0.000366307	0	1.7e-05	0	Eukaryota	Alveolata	Ciliophora	Spirotrichea	Spirotrichea_unclassified	Spirotrichea_unclassified	Spirotrichea_unclassified
OTU_363	0.00458454	0.00640766	0.000181025	0.000642105	0	0	0	2.52e-05	4.19e-05	0.000436872	0	0	0	0	0	0	0	0	0	0.000477755	0.00087859	0.000254348	0	0	0	0	0	0	0	0	0	0	0	0	0	0	0	Eukaryota	Opisthokonta	Choanoflagellida	Choanoflagellatea	Craspedida	Salpingoecidae_Group_C1	Salpingoecidae_Group_C1_X_sp.
OTU_1830	0	0	0.00205161	0.000624751	8.99e-05	0.000129587	0	0	0	0	0	0.000115271	4.27e-05	6.17e-05	0	4.1e-05	0	0.000123909	0	0	0	0	0	0	0.0008338	0.00144589	0.00173349	0.00142954	0.00076002	0.000461216	0.000969905	0.000144519	0.000221131	0.000627954	0.000515838	0.000460068	0.000355306	Eukaryota	Alveolata	Ciliophora	Spirotrichea	Strombidiida	Strombidiidae_R	Strombidium_biarmatum
OTU_33	0.00326611	0.00242817	0.000301708	0.000624751	0	0	0	0	0	4.85e-05	0	0	0	0	0	0	0	0	0	2.9e-05	0	0	0	0	0	0	0	0	0	0	0	0	0	0	0	0	0	Eukaryota	Stramenopiles	Ochrophyta	Chrysophyceae	Chrysophyceae_X	Chrysophyceae_Clade-D	Chrysophyceae_Clade-D_X_sp.
OTU_3434	0.00770084	0.0134898	0.000160911	0.000624751	0	0	0	2.52e-05	0.000321593	0.000315519	8.36e-05	0	0	0	0	0	0	0	0.0138232	0.00984466	0.00239782	0.00160435	0	0.000200458	1.37e-05	0	3.47e-05	1.57e-05	0	0	0	0	0	0	0	0	0	Eukaryota	Alveolata	Ciliophora	Spirotrichea	Choreotrichida	Strobilidiidae_B	Strobilidiidae_B_X_sp.
OTU_676	0	2.25e-05	0.000945351	0.000607396	0.0131883	0.00860945	0.000119147	0.000251851	0	0	0	0.00016138	0.000384522	0.000308594	0.000369979	0.000287026	0.000384186	0.000177013	0	0	0	3.91e-05	4.83e-05	0	6.83e-05	5.04e-05	0.000260024	7.85e-05	0.000155106	0.000838574	2.77e-05	0.000307103	0.000199018	0.000226761	0.000241799	0.00039191	9.35e-05	Eukaryota	Archaeplastida	Chlorophyta	Mamiellophyceae	Mamiellales	Mamiellaceae	Micromonas_commoda_C
OTU_670	0	4.5e-05	0.000885009	0.000607396	0.00395648	0.0040091	0.00103261	0.00103259	0	0	2.79e-05	0.00059941	0.00703533	0.00780744	0.00260747	0.00172216	0.000873149	0.00166392	0	0	3.66e-05	0	0	0	0.00047841	0.000706132	0.000606722	0.0010211	0.00108574	0.00048218	0.00121931	0.0013368	0.000331697	0.00129079	0.000580318	0.000715661	0.00100982	Eukaryota	Alveolata	Dinoflagellata	Dinophyceae	Gymnodiniales	Gymnodiniaceae	Gyrodinium_unclassified
OTU_3156	0	2.25e-05	0.000623529	0.000607396	0.00110901	0.00138496	0.00045673	0.000377777	0	0	0	0.000207488	8.54e-05	9.26e-05	0	0.000471543	8.73e-05	0.000123909	3.26e-05	0	3.66e-05	0	0	0	9.57e-05	0.000151314	0.000277359	0.000204219	6.2e-05	0.000125786	0.000193981	0.000198714	2.21e-05	0.000366307	8.06e-05	0.000187435	1.87e-05	Eukaryota	Alveolata	Dinoflagellata	Dinophyceae	Gymnodiniales	Gymnodiniaceae	Gyrodinium_helveticum
OTU_4633	0	0	0.000482732	0.000607396	0.00119893	0.000971904	0.000278009	0.000402962	0	0	0	0.000553301	9.97e-05	0.000632618	0	0.00114811	0.00111763	0.000619546	0	0	0	0	3.22e-05	0	0.00060143	0.000487567	0.00136946	0.00157092	0.000496339	0.000419287	0.000415674	0.00222198	0.000154792	0.00151756	0.000354639	0.00175507	0.000168303	Eukaryota	Alveolata	Dinoflagellata	Dinophyceae	Dinophyceae_unclassified	Dinophyceae_unclassified	Dinophyceae_unclassified
OTU_15679	0	0	0.000321822	0.000607396	0.0008992	0.00149025	0.000238294	0.000176296	0	0	2.79e-05	6.92e-05	0.000384522	0.000401173	0	0.000635558	0.000139704	0	0	0	0	0	0	0	0	0	0	3.14e-05	3.1e-05	4.19e-05	0	7.23e-05	0	6.98e-05	3.22e-05	0.000102237	3.74e-05	Eukaryota	Alveolata	Dinoflagellata	Dinophyceae	Dinophyceae_unclassified	Dinophyceae_unclassified	Dinophyceae_unclassified
OTU_93	0.00374554	0.00245065	0.000281594	0.000607396	0	0	0	0	0.00454425	0.0163827	0.000974795	0.00016138	0	1.54e-05	0	0	0	0	0.000489029	0.00050671	0.000164736	1.96e-05	0	0	0	0	0	0	0	0	0	0	0	0	0	0	0	Eukaryota	Stramenopiles	Ochrophyta	Chrysophyceae	Chrysophyceae_X	Chrysophyceae_X_unclassified	Chrysophyceae_X_unclassified
OTU_1793	0	0	0.000221252	0.000607396	0.00161856	0.000615539	0.00045673	0.000176296	0	0	0	0.000253596	0.00197958	0.00126524	0.0019556	0.000779072	0.00104778	5.31e-05	0	0	0	0	0	0	4.1e-05	0.000134501	0.000138679	3.14e-05	4.65e-05	0.000104822	0.000387962	0.000126454	0.000110566	0.000209318	9.67e-05	0.000306712	5.61e-05	Eukaryota	Hacrobia	Haptophyta	Prymnesiophyceae	Prymnesiales	Prymnesiaceae	Haptolina_sp.
OTU_596	0	0	0.000160911	0.000607396	0.00017984	0.000113389	0	0	0	0	2.79e-05	2.31e-05	0.00133871	0.00182071	0	0.000266525	0.000436574	0	0	0	0	0	0	0	0	3.36e-05	5.2e-05	1.57e-05	0	0.000125786	0	3.61e-05	8.85e-05	0.000122102	1.61e-05	0.000136316	1.87e-05	Eukaryota	Alveolata	Ciliophora	Spirotrichea	Strombidiida	Strombidiidae_L	Strombidiidae_L_X_sp.
OTU_3690	0	0	0.000744212	0.000590042	3e-05	0.000113389	0	0	0	0	0	6.92e-05	4.27e-05	0	0	4.1e-05	0	7.08e-05	0	0	0	0	8.04e-05	0	0.000410066	0.000302628	0.000641392	0.000455567	0.000139595	0.000188679	0.000249404	7.23e-05	0.000221131	0.000244205	0.000193439	0.00037487	0.000112202	Eukaryota	Alveolata	Ciliophora	Spirotrichea	Strombidiida	Strombidiidae_R	Strombidium_R_unclassified
OTU_8909	0	4.5e-05	0.000583301	0.000590042	0.0119893	0.009144	9.93e-05	0.000226666	0	0	2.79e-05	6.92e-05	0.000199382	0.000200586	0.000440451	0.000164015	0.00017463	8.85e-05	0	0	0	0	4.83e-05	2.86e-05	9.57e-05	3.36e-05	0.000156014	6.28e-05	0.000201638	0.000838574	0.000193981	0.000343233	0.000442263	0.000244205	0.000274039	0.000255593	0.000205704	Eukaryota	Archaeplastida	Chlorophyta	Mamiellophyceae	Mamiellales	Mamiellaceae	Micromonas_commoda_C
OTU_22983	0	4.5e-05	0.000301708	0.000590042	0.000839253	0.00128777	0.0011319	0.00138518	0	0	0.000111405	0.000230542	0.000484213	0.000709767	7.05e-05	0.000922585	0.00034926	5.31e-05	0	0	0	0	0	0	0	5.04e-05	0.000381368	7.85e-05	0.000155106	2.1e-05	0.000138558	0.000144519	0.000110566	0.000226761	0.000145079	0.000255593	0.000280505	Eukaryota	Alveolata	Dinoflagellata	Dinophyceae	Dinophyceae_unclassified	Dinophyceae_unclassified	Dinophyceae_unclassified
OTU_4598	0	2.25e-05	0.000241366	0.000590042	0.00281749	0.00531307	1.99e-05	0	0	0	0	0.00016138	0.000341798	0.000648048	1.76e-05	0.00246023	0.000122241	0	6.52e-05	0	0	0	0	0	0	0	0.000156014	0	6.2e-05	2.1e-05	8.31e-05	0	2.21e-05	0.000418636	0.000128959	0.000136316	3.74e-05	Eukaryota	Alveolata	Dinoflagellata	Dinophyceae	Dinophyceae_unclassified	Dinophyceae_unclassified	Dinophyceae_unclassified
OTU_1163	3e-05	0	0.000221252	0.000590042	0.0004496	0.000283472	0	0	0	2.43e-05	0	0	1.42e-05	0.000138867	1.76e-05	6.15e-05	3.49e-05	0	0	0	0	0	0	2.86e-05	0	3.36e-05	0	6.28e-05	1.55e-05	4.19e-05	2.77e-05	0	0	0	0	0	0	Eukaryota	Stramenopiles	Ochrophyta	Chrysophyceae	Chrysophyceae_X	Chrysophyceae_Clade-C	Chrysophyceae_Clade-C_unclassified
OTU_384	0	0	0.000181025	0.000590042	0.00125888	0.00211389	0	0	0	0	0	0	0	0.000154297	0.000105708	0.000574053	0.000768371	0	0	0	0	0	0	0	0	0	0	0	0	0	0	0	0	0	0	0	0	Eukaryota	Alveolata	Dinoflagellata	Dinophyceae	Gymnodiniales	Gymnodiniaceae	Margalefidinium_fulvescens
OTU_5371	0	0	0.00148842	0.000572688	0.000149867	6.48e-05	0	0	0	0	0	2.31e-05	0	0	0	0	0	0	0	0	0	0	0	0	0	0	0	0	0	0	0	0	0	3.49e-05	0	1.7e-05	0	Eukaryota	Hacrobia	Cryptophyta	Cryptophyceae	Cryptophyceae_X	Cryptomonadales	Cryptomonadales_unclassified
OTU_961	0	0	0.00124706	0.000572688	0.000119893	6.48e-05	0	0.000402962	0	0	0	2.31e-05	0	0	0	0	0	0.000106208	0	0	0	0	0	0	2.73e-05	0.000100876	0	1.57e-05	0.000155106	0.00102725	0.00160727	1.81e-05	8.85e-05	0	0	3.41e-05	7.48e-05	Eukaryota	Alveolata	Ciliophora	Spirotrichea	Choreotrichida	Strobilidiidae_A	Rimostrombidium_A_sp.
OTU_5663	0	0	0.000965465	0.000572688	0	3.24e-05	0	0	0	0	2.79e-05	0.00322759	0.000398764	0.00054004	3.52e-05	0.000164015	1.75e-05	0.000283221	0	0	0	0	0.00299165	0.000114548	0.00930849	0.0082382	0.00629258	0.000864006	0.00322621	0.00127883	0.00451699	0.000415492	0.00161426	0.000750057	0.00238575	0.000732701	0.00106592	Eukaryota	Alveolata	Ciliophora	Spirotrichea	Strombidiida	Strombidiidae_R	Strombidiidae_R_X_sp.
OTU_147	0.00251701	0.0119835	0.000583301	0.000572688	0	0	0	0	0.000321593	0.00131062	0.0111684	0.00172907	0	0	1.76e-05	0	5.24e-05	0	3.26e-05	0.000998943	0.000201344	0.000156522	3.22e-05	1.43e-05	2.73e-05	0	0	0	0	0	0	0	0	0	0	0	0	Eukaryota	Archaeplastida	Chlorophyta	Chlorophyceae	Chlamydomonadales	Chlamydomonadales_X	Chlamydomonadales_X_unclassified
OTU_3481	0	4.5e-05	0.000402277	0.000572688	0.00125888	0.000915209	0.00281981	0.00367703	0	2.43e-05	0.000194959	0.000853006	0.000569663	0.00151211	0.000211416	0.000697064	0.000733445	0.000247818	0	0	0	0	3.22e-05	0	1.37e-05	0.000117689	0.00112677	6.28e-05	0.000217149	0.000251572	0.000554232	0.000397428	0.000995091	0.000523295	0.00125735	0.000937175	0.00147733	Eukaryota	Alveolata	Dinoflagellata	Dinophyceae	Dinophyceae_unclassified	Dinophyceae_unclassified	Dinophyceae_unclassified
OTU_1442	0.00737123	0.00687981	0.000925237	0.000555334	0	0	0	0	0.000307611	0.000388331	0	0	0	0	0	0	0	0	0.00195612	0.000767304	0.00113484	0.000195653	0	0	0	0	1.73e-05	0	1.55e-05	0	0	0	0	0	0	1.7e-05	0	Eukaryota	Alveolata	Ciliophora	CONTH_5	CONTH_5_X	CONTH_5_XX	CONTH_5_XXX_sp.
OTU_2307	0	0	0.000844781	0.000555334	0.00167851	0.000826118	0	7.56e-05	0	0	0	0	4.27e-05	4.63e-05	0	4.1e-05	0	0	0	1.45e-05	7.32e-05	1.96e-05	0	0	0	0	0	0	0	0	0	0	0	0	0	1.7e-05	0	Eukaryota	Hacrobia	Cryptophyta	Cryptophyceae	Cryptophyceae_X	Cryptomonadales	Cryptomonadales_unclassified
OTU_810	0	4.5e-05	0.000824668	0.000555334	0.0156161	0.0101402	9.93e-05	0.000201481	0	0	0.000111405	0.00016138	0.00027059	0.000246875	0.000317125	0.000143513	0.000192093	0.00014161	0	0	0	0	8.04e-05	0	0.000109351	1.68e-05	0.000190684	0.000125674	6.2e-05	0.00104822	5.54e-05	0.000343233	0.000486489	0.000244205	0.000241799	0.00037487	0.000130902	Eukaryota	Archaeplastida	Chlorophyta	Mamiellophyceae	Mamiellales	Mamiellaceae	Micromonas_commoda_C
OTU_13419	0	0	0.000703985	0.000555334	0.000839253	0.00050215	0.00170777	0.00103259	4.19e-05	7.28e-05	0.00164322	0.00767706	0.0167623	0.0122203	0.000933756	0.00672462	0.00511665	0.0230471	0	0.000115819	0	0.000665219	0.00450356	0.00173253	0.00441504	0.00660737	0.0090835	0.00920559	0.00766224	0.0152411	0.0133293	0.0150481	0.0145062	0.00579114	0.0105747	0.00528226	0.00749883	Eukaryota	Hacrobia	Cryptophyta	Cryptophyceae	Cryptophyceae_X	Cryptomonadales	Teleaulax_gracilis
OTU_128	0	2.25e-05	0.000543074	0.000555334	0.00233792	0.00130397	0.000417014	0.000428147	0	0	0	0.00142936	0.00246379	0.00202129	0.000739958	0.00284976	0.000855686	0.00120369	0	0	0	0	0	0	0.000328053	0.000807008	0.00119611	0.00166517	0.000853084	0.000733753	0.000581943	0.00204133	0.000331697	0.00237227	0.000451358	0.00267521	0.000486209	Eukaryota	Alveolata	Dinoflagellata	Dinophyceae	Dinophyceae_unclassified	Dinophyceae_unclassified	Dinophyceae_unclassified
OTU_306	0	0	0.000442505	0.000555334	0.000209813	0.000323968	0	0	0	0	0	0	2.85e-05	0.000231446	0	0	0	0	0	0	0	0	0	0	0	6.73e-05	1.73e-05	0	1.55e-05	0	0	0	2.21e-05	0	4.84e-05	0	5.61e-05	Eukaryota	Alveolata	Ciliophora	Spirotrichea	Strombidiida	Strombidiida_unclassified	Strombidiida_unclassified
OTU_3280	0	0	0.000201138	0.000555334	0.000689386	0.000980003	0.00476588	0.00566665	0	0	0	0	7.12e-05	0.000138867	0.000211416	0.000205019	0.000122241	0	0	0	0	0	0	0	0	0	0	0	0	0	0	1.81e-05	2.21e-05	6.98e-05	0	3.41e-05	5.61e-05	Eukaryota	Alveolata	Dinoflagellata	Syndiniales	Dino-Group-I	Dino-Group-I-Clade-5	Dino-Group-I-Clade-5_X_sp.
OTU_130	0.00275672	0.00411439	0.000181025	0.000555334	0	0	0	0	0.000153805	0.00203874	0.00111405	0.000138325	0	0	1.76e-05	0	0	0	0	0.000796259	0	0	0	0	0	0	0	0	0	0	0	0	0	0	0	0	0	Eukaryota	Eukaryota_unclassified	Eukaryota_unclassified	Eukaryota_unclassified	Eukaryota_unclassified	Eukaryota_unclassified	Eukaryota_unclassified
OTU_831	0	0	0.00251423	0.00053798	0.000569493	0.00234067	0	0	0	0	0	0	0	0	0	0	0	0	0	0	0	0	0	0	0	0	0	0	0	2.1e-05	0	0	0	1.74e-05	0	0	0	Eukaryota	Stramenopiles	Ochrophyta	Bacillariophyta	Bacillariophyta_X	Polar-centric-Mediophyceae	Chaetoceros_unclassified
OTU_3866	0	0	0.000905123	0.00053798	5.99e-05	8.91e-05	0	0	0	0	0	0	1.42e-05	1.54e-05	0	0	0	0	0	0	0	0	0	0	0	5.04e-05	0.00010401	1.57e-05	4.65e-05	0.000167715	0.000360251	0.000325168	4.42e-05	0.000488409	8.06e-05	5.11e-05	1.87e-05	Eukaryota	Alveolata	Ciliophora	Spirotrichea	Strombidiida	Strombidiidae_R	Strombidium_R_unclassified
OTU_5438	0	0	0.000663757	0.00053798	0.00026976	0.000153885	1.99e-05	0	0	0	0	0	4.27e-05	3.09e-05	0	0	1.75e-05	1.77e-05	0	2.9e-05	5.49e-05	0	0	0	0	0	1.73e-05	0	0	2.1e-05	0	0	0	0	0	0	0	Eukaryota	Hacrobia	Cryptophyta	Cryptophyceae	Cryptophyceae_X	Cryptomonadales	Cryptomonadales_unclassified
OTU_3592	0	4.5e-05	0.000100569	0.00053798	0.000329707	0.000874713	0.00784384	0.0091422	0	2.43e-05	0	0.00087606	0.000284831	0.000648048	0	0.000184517	1.75e-05	0.000300922	0	0	3.66e-05	0	8.04e-05	0	0	0.000168127	0.000589388	0.000377021	0.000697977	0.000167715	0.000609655	0.00216779	8.85e-05	0.00312233	0.000564198	0.00197659	0.00170173	Eukaryota	Alveolata	Ciliophora	Spirotrichea	Strombidiida	Strombidiidae_M	Strombidiidae_M_unclassified
OTU_4979	0	0	0.00118672	0.000520625	0	1.62e-05	0	0	0	0	0	0	0	0	0	0	0	0	0	0	0	0	0	0	0	0	0	0	0	0	0	1.81e-05	0	0	0	0	0	Eukaryota	Eukaryota_unclassified	Eukaryota_unclassified	Eukaryota_unclassified	Eukaryota_unclassified	Eukaryota_unclassified	Eukaryota_unclassified
OTU_2819	0	0	0.000482732	0.000520625	0.000509547	0.000259174	0.00091346	0.000881479	0.00290832	0.00269404	0.00275728	0.0073543	0.0197388	0.0121432	0.000863284	0.00489995	0.00555323	0.0276671	0	4.34e-05	0	0.00074348	0.0046644	0.00190435	0.00512582	0.00536324	0.00790473	0.0103681	0.00626629	0.0163103	0.00983761	0.0134222	0.015435	0.00411659	0.0102039	0.00437916	0.00645161	Eukaryota	Hacrobia	Cryptophyta	Cryptophyceae	Cryptophyceae_X	Cryptomonadales	Cryptomonadales_unclassified
OTU_938	0	2.25e-05	0.000402277	0.000520625	0.000149867	0.000413059	0.000834028	0.00153629	0	0	0.000111405	0.00117577	1.42e-05	0.000262305	0	8.2e-05	0	8.85e-05	0	0	0	0	1.61e-05	1.43e-05	0	0.000453942	0.000832077	0.000109964	0.000139595	6.29e-05	0.000304827	7.23e-05	0.000442263	0.000191875	0.000757637	0.000340791	0.000766713	Eukaryota	Alveolata	Dinoflagellata	Dinophyceae	Dinophyceae_unclassified	Dinophyceae_unclassified	Dinophyceae_unclassified
OTU_2435	0	0	0.000362049	0.000520625	0.000209813	0.000153885	0	0	0	0	0	0	0.000170899	1.54e-05	3.52e-05	0	0	0	0	0	0	1.96e-05	0	0	0	0	0	0	0	0	0	0	0	0	0	0	3.74e-05	Eukaryota	Alveolata	Dinoflagellata	Dinophyceae	Suessiales	Suessiaceae	Protodinium_simplex
OTU_395	0.00653223	0.00499123	0.000241366	0.000520625	0	0	0	0	0	0	0	0	0	0	0	0	0	0	0	2.9e-05	0	0	0	0	0	0	0	0	0	0	0	0	0	0	0	0	0	Eukaryota	Alveolata	Dinoflagellata	Dinophyceae	Dinophyceae_unclassified	Dinophyceae_unclassified	Dinophyceae_unclassified
OTU_202	0.00446469	0.00247313	0.000181025	0.000520625	0	0	0	0	0.00142619	0.00638319	0.000278513	9.22e-05	1.42e-05	1.54e-05	3.52e-05	0	0	0	0	0.000781782	1.83e-05	0	0	0	0	0	0	0	0	0	0	0	0	0	0	0	0	Eukaryota	Stramenopiles	Ochrophyta	Chrysophyceae	Chrysophyceae_X	Chrysophyceae_Clade-C	Chrysophyceae_Clade-C_unclassified
OTU_4453	0	0	0.000643643	0.000503271	0.000149867	8.91e-05	0.000139005	2.52e-05	0	0	0	4.61e-05	0	3.09e-05	0	0	0	0	0	0	0	0	1.61e-05	0	0.000164026	0.000168127	0.000156014	3.14e-05	7.76e-05	0.000125786	0.000166269	1.81e-05	2.21e-05	0.000104659	3.22e-05	8.52e-05	0	Eukaryota	Alveolata	Dinoflagellata	Dinophyceae	Dinophyceae_unclassified	Dinophyceae_unclassified	Dinophyceae_unclassified
OTU_22215	0	0	0.000462618	0.000503271	0.000209813	0.000121488	0.000119147	2.52e-05	0	0	0	0.000299705	4.27e-05	0.000401173	0	0.000471543	0.00034926	0.000212416	0	0	0	0	0	0	0.000382728	0.000638881	0.000745402	0.000832587	0.000325723	0.00048218	0.000304827	0.00153552	2.21e-05	0.000505852	9.67e-05	0.000613424	3.74e-05	Eukaryota	Alveolata	Dinoflagellata	Dinophyceae	Dinophyceae_unclassified	Dinophyceae_unclassified	Dinophyceae_unclassified
OTU_2171	3e-05	0	0.000362049	0.000503271	0.00101909	0.00171703	0.00214464	0.0011837	0	0	0	9.22e-05	8.54e-05	6.17e-05	0.000123326	0.000184517	0.000244482	1.77e-05	0	0	0	0	0	0	0	0.000151314	3.47e-05	6.28e-05	0.000139595	0.000104822	0.000166269	9.03e-05	0.000331697	8.72e-05	0.000725397	0.000272633	0.00196353	Eukaryota	Alveolata	Dinoflagellata	Dinophyceae	Dinophyceae_unclassified	Dinophyceae_unclassified	Dinophyceae_unclassified
OTU_265	0	0	0.000362049	0.000503271	5.99e-05	0.00020248	0	0	0	0	0	6.92e-05	0.000569663	0.000694337	8.81e-05	0.000533049	0.000122241	0	0	0	0	0	0	0	0	0	1.73e-05	0	1.55e-05	0	0	5.42e-05	0	0	0	0	0	Eukaryota	Alveolata	Dinoflagellata	Dinophyceae	Peridiniales	Protoperidiniaceae	Protoperidinium_sp.
OTU_3647	0	0	0.000623529	0.000485917	8.99e-05	0.000437357	0	0	0	0	0.000194959	0.000322759	0.000213623	0.000262305	0.000440451	0.000615057	0.000209556	0.000424831	0	0	0	0	8.04e-05	1.43e-05	0.000396397	0.000605256	0.000537383	0.000424148	0.00105472	0.00190776	0.000665078	0.000451622	0.00148158	0.000558182	0.000209559	0.00105645	0.00138382	Eukaryota	Stramenopiles	Ochrophyta	Bacillariophyta	Bacillariophyta_X	Polar-centric-Mediophyceae	Chaetoceros_unclassified
OTU_2347	0	0	0.000603415	0.000485917	0.000149867	7.29e-05	0	0	0	0	0	0	1.42e-05	6.17e-05	0	0	0	0	0	0	0	0	0	0	1.37e-05	3.36e-05	0	9.43e-05	9.31e-05	0.000188679	0.000110846	3.61e-05	0	0.000174432	1.61e-05	5.11e-05	0	Eukaryota	Alveolata	Ciliophora	Spirotrichea	Spirotrichea_unclassified	Spirotrichea_unclassified	Spirotrichea_unclassified
OTU_4878	0	0	0.000462618	0.000485917	0	9.72e-05	0	0	0	0	0	4.61e-05	7.12e-05	1.54e-05	0	2.05e-05	0	3.54e-05	0	0	0	0	1.61e-05	0	0.00012302	0.000470754	0.000970756	0.000157092	0.00024817	0.000125786	0.000581943	3.61e-05	0.000420149	0.000122102	0.000596437	0.000204475	0.000112202	Eukaryota	Alveolata	Dinoflagellata	Dinophyceae	Peridiniales	Peridiniales_unclassified	Peridiniales_unclassified
OTU_3915	0	0	0.000442505	0.000485917	0.00377664	0.00472993	0.00107232	0.000881479	0	0	0.000501323	0.00385005	0.00440064	0.00553927	0.00167371	0.0043669	0.000890612	0.00293842	3.26e-05	0	0	0	0.000530777	0	0.000287046	0.00218564	0.00192418	0.00111535	0.00857737	0.00121593	0.00484953	0.00142713	0.0016806	0.00307	0.00177319	0.00569121	0.00357176	Eukaryota	Alveolata	Dinoflagellata	Dinophyceae	Gymnodiniales	Gymnodiniaceae	Gymnodiniaceae_unclassified
OTU_23256	0	0	0.000402277	0.000485917	5.99e-05	4.05e-05	5.96e-05	2.52e-05	0	0	0	0.00016138	5.7e-05	0.000123438	0	0	1.75e-05	0	0	0	0	0	0	0	4.1e-05	0	3.47e-05	6.28e-05	6.2e-05	0.000146751	0.000221693	3.61e-05	8.85e-05	5.23e-05	6.45e-05	6.82e-05	1.87e-05	Eukaryota	Alveolata	Dinoflagellata	Dinophyceae	Gymnodiniales	Gymnodiniaceae	Gymnodiniaceae_unclassified
OTU_2499	0.00419501	0.00415936	0.000181025	0.000485917	0	0	0	0	0	0	2.79e-05	0	0	0	0	0	0	0	3.26e-05	0	0.000128128	0.000234783	0	0	0	0	1.73e-05	0	0	0	0	0	0	0	0	0	0	Eukaryota	Hacrobia	Telonemia	Telonemia_X	Telonemia_XX	Telonemia-Group-2	Telonemia-Group-2_X_sp.
OTU_987	0	0	0.000140797	0.000485917	0.000209813	0.000437357	7.94e-05	0.000226666	0	0	0	0	1.42e-05	0	0	2.05e-05	0	0	0	0	0	0	0	0	0	0	0	0	4.65e-05	0	0	0	0	0	0	0	0	Eukaryota	Alveolata	Dinoflagellata	Syndiniales	Dino-Group-II	Dino-Group-II-Clade-30	Dino-Group-II-Clade-30_X_sp.
OTU_840	0.00206754	0.000157381	6.03e-05	0.000485917	0	0	0	0	0	0	0	2.31e-05	0	0	0	0	0	0	0	0	0.0064796	0.000273914	0	0	0	0	0	0	0	0	0	0	0	0	0	0	0	Eukaryota	Alveolata	Ciliophora	Litostomatea	Litostomatea_X	Litostomatea_XX	Litostomatea_XX_unclassified
OTU_771	0	0	0.000563188	0.000468563	0.000599466	0.000429258	0	7.56e-05	0	0	0	0	2.85e-05	9.26e-05	0	0	0	0	0	0	0	0	0	0	0	5.04e-05	8.67e-05	4.71e-05	3.1e-05	0.000125786	0.000193981	0.00084905	2.21e-05	0.0007675	1.61e-05	0.000136316	3.74e-05	Eukaryota	Alveolata	Ciliophora	Spirotrichea	Spirotrichea_unclassified	Spirotrichea_unclassified	Spirotrichea_unclassified
OTU_1036	0	0	0.000462618	0.000468563	0.00302731	0.00242166	0.00222408	0.00269481	0	4.85e-05	5.57e-05	9.22e-05	0.00091146	0.00124981	0.000158562	0.00116861	0.00146689	1.77e-05	0	0	0	0	0	0	0	0.000269003	0.000312029	0.000471276	0.000217149	0.000251572	0.000498808	0.000487752	0.000199018	0.000540739	0.000209559	0.000681582	0.000392707	Eukaryota	Alveolata	Dinoflagellata	Dinophyceae	Torodiniales	Torodiniaceae	Torodinium_robustum
OTU_913	0	0	0.000301708	0.000468563	0.000209813	3.24e-05	0.0128679	0.0122148	0	0	0	0	0	0	3.52e-05	0	1.75e-05	0	0	0	0	0	0	0	0	0	0	0	0	0	0	0	2.21e-05	0	0	0	0	Eukaryota	Alveolata	Dinoflagellata	Syndiniales	Dino-Group-I	Dino-Group-I-Clade-1	Dino-Group-I-Clade-1_X_sp.
OTU_711	0	8.99e-05	0.00026148	0.000468563	0.000689386	0.000615539	0.000595735	0.000780738	1.4e-05	0	2.79e-05	9.22e-05	0.000840252	0.00205215	7.05e-05	0.000451041	8.73e-05	3.54e-05	0	0	0	1.96e-05	1.61e-05	0	2.73e-05	3.36e-05	0.000277359	1.57e-05	0.000108574	0.000188679	5.54e-05	0.000126454	2.21e-05	5.23e-05	3.22e-05	0.000119277	5.61e-05	Eukaryota	Alveolata	Dinoflagellata	Dinophyceae	Dinophyceae_unclassified	Dinophyceae_unclassified	Dinophyceae_unclassified
OTU_8114	0	0	0.000221252	0.000468563	0.00164853	0.00115009	0.000297867	0.000125926	0	0	0	0.00059941	0.00018514	0.000894924	0	0.0021937	0.00153674	0.000477935	0	0	0	0	1.61e-05	0	0.000437403	0.000689319	0.0010921	0.00164946	0.000372255	0.000461216	0.000609655	0.00225811	0.000287471	0.00193619	0.000274039	0.00178915	0.000168303	Eukaryota	Alveolata	Dinoflagellata	Dinophyceae	Gymnodiniales	Gymnodiniaceae	Gyrodinium_unclassified
OTU_178	3e-05	2.25e-05	0.000100569	0.000468563	5.99e-05	1.62e-05	0	0	0	0	0.00289653	0.00248986	0.00018514	0.000231446	0.000405215	0.000471543	0.000715982	0.000230117	0	0	0	1.96e-05	0	1.43e-05	5.47e-05	8.41e-05	3.47e-05	1.57e-05	4.65e-05	0.00033543	2.77e-05	7.23e-05	4.42e-05	3.49e-05	1.61e-05	3.41e-05	3.74e-05	Eukaryota	Rhizaria	Cercozoa	Filosa-Thecofilosea	Cryomonadida	Protaspa-lineage	Protaspa-lineage_X_sp.
OTU_1247	0.00338597	0.00283286	0.000100569	0.000468563	0	0	0	0	0.000964779	0.00036406	0	0	0	0	0	0	0	0	0.00286897	0.000361936	0.00642469	0.00199566	0	0	4.1e-05	0	0	0	6.2e-05	0	0	0	0	0	0	0	0	Eukaryota	Alveolata	Ciliophora	CONThreeP	CONThreeP_X	CONThreeP_X_unclassified	CONThreeP_X_unclassified
OTU_89	0	0	8.05e-05	0.000468563	0.000749333	0.00111769	1.99e-05	0	0	0	0	0	0	4.63e-05	0	4.1e-05	0	0	0	0	0	0	0	0	0	0	0	0	0	0	0	0	0	0	0	0	0	Eukaryota	Alveolata	Ciliophora	Phyllopharyngea	Cyrtophoria_1	PHYLL_4	PHYLL_4_X_sp.
OTU_2007	0	0	0.000905123	0.000451209	8.99e-05	0.000615539	0	2.52e-05	0	0	2.79e-05	0.00016138	0.000413005	0.000185157	0.000158562	8.2e-05	0.000122241	3.54e-05	0	0	0	0	0	0	0	0	0	0	0	0	0	0	0	3.49e-05	0	0	0	Eukaryota	Stramenopiles	Ochrophyta	Bacillariophyta	Bacillariophyta_X	Polar-centric-Mediophyceae	Chaetoceros_decipiens
OTU_11509	0	0	0.000804554	0.000451209	5.99e-05	2.43e-05	0	0	0	0	2.79e-05	2.31e-05	1.42e-05	1.54e-05	1.76e-05	0	0	5.31e-05	0	0	0	0	6.43e-05	0	9.57e-05	0	1.73e-05	0.000141383	0.000155106	8.39e-05	2.77e-05	1.81e-05	2.21e-05	5.23e-05	1.61e-05	1.7e-05	1.87e-05	Eukaryota	Alveolata	Ciliophora	Spirotrichea	Strombidiida	Strombidiidae_R	Strombidium_R_unclassified
OTU_22281	0	0	0.000744212	0.000451209	0.000689386	0.000858515	0.000238294	0.000352592	0	0	5.57e-05	0.00306621	0.00626629	0.00390372	0.00213178	0.00284976	0.000192093	0.00226577	0	0	0	0	0.000160842	0	0.000177695	0.00114326	0.000710732	0.000722623	0.0016131	0.000503145	0.000969905	0.000433557	0.000375923	0.00148267	0.000483598	0.00166988	0.000766713	Eukaryota	Alveolata	Dinoflagellata	Dinophyceae	Gymnodiniales	Gymnodiniaceae	Gymnodiniaceae_unclassified
OTU_935	0	0	0.000422391	0.000451209	0.000239787	0.000988102	0	0	0	0	0	6.92e-05	4.27e-05	3.09e-05	0	2.05e-05	0	0	0	0	0	0	0	0	0	0	0	0	1.55e-05	0	0	0	0	0	0	0	0	Eukaryota	Stramenopiles	Ochrophyta	Bacillariophyta	Bacillariophyta_X	Polar-centric-Mediophyceae	Polar-centric-Mediophyceae_X_sp.
OTU_6558	0	0	0.000281594	0.000451209	8.99e-05	2.43e-05	0	0	0	0	0	0	9.97e-05	0.00052461	0	4.1e-05	0	0	0	0	0	0	0	0	0	0	0	0	0	0	0	5.42e-05	0	0.000122102	0	0	0	Eukaryota	Alveolata	Ciliophora	Spirotrichea	Strombidiida_G	Strombidiida_G_X	Strombidiida_G_XX_sp.
OTU_21806	0	0	0.000221252	0.000451209	0.00104907	0.00121488	0.000317725	0.000352592	0	0	8.36e-05	0.00016138	0.000398764	0.000432032	7.05e-05	0.0010456	8.73e-05	1.77e-05	0	0	0	0	0	0	1.37e-05	0	1.73e-05	1.57e-05	1.55e-05	0	2.77e-05	5.42e-05	2.21e-05	8.72e-05	0	0	0	Eukaryota	Alveolata	Dinoflagellata	Dinophyceae	Dinophyceae_unclassified	Dinophyceae_unclassified	Dinophyceae_unclassified
OTU_3501	0	0	0.000201138	0.000451209	0.000779306	0.00128777	0.00129076	0.00103259	0	0	0	2.31e-05	4.27e-05	6.17e-05	0.000229035	0.000164015	0.000139704	0	0	0	0	0	0	0	0	3.36e-05	8.67e-05	1.57e-05	0	4.19e-05	0.000138558	9.03e-05	8.85e-05	6.98e-05	0.000725397	0.000102237	0.00143993	Eukaryota	Alveolata	Dinoflagellata	Dinophyceae	Dinophyceae_unclassified	Dinophyceae_unclassified	Dinophyceae_unclassified
OTU_6517	0	0	0.000181025	0.000451209	3e-05	4.05e-05	0	0	0	0	0	0	0	0	0	0	0	0	0	0	0	0	0	0	1.37e-05	5.04e-05	5.2e-05	6.28e-05	4.65e-05	0.000167715	8.31e-05	0.000144519	0	0.000104659	3.22e-05	1.7e-05	0	Eukaryota	Alveolata	Ciliophora	Spirotrichea	Strombidiida	Strombidiidae_R	Strombidium_R_unclassified
OTU_2653	0	0	6.03e-05	0.000451209	5.99e-05	0.000639837	0.000139005	0	0	0	2.79e-05	0.000991332	0.00103963	0.00339454	0.000616631	0.0118091	0.00819014	0.000159312	0	0	3.66e-05	3.91e-05	0	0	0	0	0	0	0	0	2.77e-05	0.000596141	0	1.74e-05	0	1.7e-05	0	Eukaryota	Alveolata	Dinoflagellata	Dinophyceae	Gymnodiniales	Gymnodiniaceae	Gymnodinium_sp.
OTU_2183	0	0	0.00100569	0.000433855	0	0	0	0	0	0	0	0	1.42e-05	0	0	2.05e-05	0	1.77e-05	0	0	0	0	0	0	4.1e-05	0	1.73e-05	0.000172801	3.1e-05	8.39e-05	2.77e-05	0	2.21e-05	3.49e-05	4.84e-05	8.52e-05	5.61e-05	Eukaryota	Alveolata	Ciliophora	Spirotrichea	Strombidiida	Strombidiidae_R	Strombidium_R_unclassified
OTU_11002	0	0	0.000985578	0.000433855	0.000119893	4.86e-05	0	0	0	0	0	0.000115271	2.85e-05	4.63e-05	0	6.15e-05	3.49e-05	0.000123909	0	0	0	0	3.22e-05	0	0.000437403	0.000521192	0.000572053	0.000644077	0.000279191	0.000167715	0.000415674	7.23e-05	0.000110566	0.000436079	0.000193439	0.000238554	7.48e-05	Eukaryota	Alveolata	Ciliophora	Spirotrichea	Strombidiida	Strombidiidae_R	Strombidium_R_unclassified
OTU_4003	0	0	0.000925237	0.000433855	5.99e-05	8.91e-05	0	0	0	0	0	4.61e-05	0	0	0	0	3.49e-05	0	0	0	0	0	0	0	0.000451072	0.000420316	0.000624057	0.000754041	0.000170617	0.000167715	0.000332539	0.000144519	0	0.000313977	9.67e-05	0.000204475	5.61e-05	Eukaryota	Alveolata	Alveolata_unclassified	Alveolata_unclassified	Alveolata_unclassified	Alveolata_unclassified	Alveolata_unclassified
OTU_4520	3e-05	0	0.000804554	0.000433855	8.99e-05	9.72e-05	0	5.04e-05	0	0	0	0	0.000413005	0.000185157	0	6.15e-05	1.75e-05	3.54e-05	0	0	0	0.000136957	0.000562945	0.00027205	0.000246039	0.000672506	0.000485378	0.000502694	0.000527361	0.00100629	0.000748213	0.00131874	0	0.000104659	1.61e-05	0.000153356	0	Eukaryota	Alveolata	Dinoflagellata	Dinophyceae	Peridiniales	Heterocapsaceae	Heterocapsa_unclassified
OTU_612	0.00284661	0.00451909	0.000543074	0.000433855	0	0	0	0	0	0	0.000919092	9.22e-05	0	0	0	0	0	0	0	0.00406816	0	0	0	0	0	0	0	0	0	0	0	0	0	0	0	0	0	Eukaryota	Eukaryota_unclassified	Eukaryota_unclassified	Eukaryota_unclassified	Eukaryota_unclassified	Eukaryota_unclassified	Eukaryota_unclassified
OTU_3210	0	0	0.000502846	0.000433855	0.000119893	4.05e-05	0	0	0	0	0	2.31e-05	5.7e-05	1.54e-05	0	0	0	7.08e-05	0	0	0	0	0	0	0.000136689	0.000521192	0.000433373	0.000282765	0.000186127	8.39e-05	0.000360251	0.000108389	6.63e-05	0.000296534	0.000128959	0.000323751	5.61e-05	Eukaryota	Alveolata	Ciliophora	Spirotrichea	Strombidiida	Strombidiidae_R	Strombidium_R_unclassified
OTU_22836	0	4.5e-05	0.000462618	0.000433855	0.000239787	0.000194381	0.000734739	0.000780738	0	0	2.79e-05	0.000184434	0.000669354	0.0014041	1.76e-05	0.000225521	6.99e-05	3.54e-05	0	0	0	0	0.00019301	2.86e-05	2.73e-05	0.000336253	0.000364033	0.000235638	0.000170617	0.000146751	0.000332539	0.000433557	0.000132679	0.000104659	6.45e-05	0.000102237	0.000130902	Eukaryota	Alveolata	Dinoflagellata	Dinophyceae	Peridiniales	Heterocapsaceae	Heterocapsa_unclassified
OTU_13062	0	0	0.000382163	0.000433855	0.00026976	5.67e-05	1.99e-05	2.52e-05	0	0	0	2.31e-05	1.42e-05	1.54e-05	0	4.1e-05	0	0	0	0	0	0	0	0	0	0	0	1.57e-05	0	0	0	0	0	3.49e-05	3.22e-05	1.7e-05	3.74e-05	Eukaryota	Alveolata	Ciliophora	Ciliophora_X	Ciliophora_XX	Ciliophora_XXX	Mesodinium_rubrum
OTU_1890	0	0	0.000281594	0.000433855	0.00194827	0.00174943	0.0032964	0.00226666	0	0	0.000974795	0.00449557	0.00535483	0.00594044	0.0329986	0.015971	0.0333892	0.0027083	0	0	0	0	6.43e-05	0	4.1e-05	0.000487567	0.000606722	0.000251347	0.00169066	0.000545073	0.00155185	0.00115615	0.000950865	0.00214551	0.000902716	0.00153356	0.00129032	Eukaryota	Opisthokonta	Choanoflagellida	Choanoflagellatea	Acanthoecida	Stephanoecidae_Group_D	Stephanoecidae_Group_D_X_sp.
OTU_594	0	0	0.000221252	0.000433855	0.000149867	0.000226778	0	0	0	0	0	4.61e-05	0	0.000138867	0	0	0	0	0	0	0	0	0	0	0	0.000117689	0.000121344	0	3.1e-05	0.000251572	0.000221693	0.000939374	0	0.0007675	9.67e-05	0.000204475	1.87e-05	Eukaryota	Alveolata	Ciliophora	Spirotrichea	Spirotrichea_unclassified	Spirotrichea_unclassified	Spirotrichea_unclassified
OTU_6576	0.0017679	0.00110167	0.000120683	0.000433855	0	2.43e-05	0	0	8.39e-05	0.000242707	0.000696282	0.000115271	0	1.54e-05	1.76e-05	0	0	0	6.52e-05	1.45e-05	0.000915198	7.83e-05	0	0	0	0	0	0	0	0	0	0	0	0	0	0	0	Eukaryota	Hacrobia	Katablepharidophyta	Katablepharidaceae	Katablepharidales	Katablepharidales_X	Katablepharidales_XX_sp.
OTU_633	0.000509394	0.00308017	6.03e-05	0.000433855	0	0	0	0	0	2.43e-05	0	0	2.85e-05	0	0	0	1.75e-05	0	0	0	0	0	0	0	0	0	0	0	0	0	0	0	0	0	0	0	0	Eukaryota	Eukaryota_unclassified	Eukaryota_unclassified	Eukaryota_unclassified	Eukaryota_unclassified	Eukaryota_unclassified	Eukaryota_unclassified
OTU_1934	0	0	4.02e-05	0.000433855	3e-05	0.000194381	0	0	0	0	0	0	0	0	0	0	0	0	0	0	0	0	0	0	0	0	0	0	0	0	0	0	0	0	0	0	0	Eukaryota	Alveolata	Dinoflagellata	Syndiniales	Dino-Group-II	Dino-Group-II-Clade-14	Dino-Group-II-Clade-14_X_sp.
OTU_1937	0	2.25e-05	0.00100569	0.0004165	0.00335701	0.00311009	0.000893602	0.000755553	0	0	2.79e-05	0.000530247	0.00647991	0.00678908	0.00311839	0.00186567	0.00103032	0.0013984	0	0	3.66e-05	0	0	0	0.00060143	0.000521192	0.000520048	0.000879715	0.00076002	0.000377358	0.000443385	0.000939374	0.000243244	0.000802386	0.000612557	0.000545266	0.000673212	Eukaryota	Alveolata	Dinoflagellata	Dinophyceae	Gymnodiniales	Gymnodiniaceae	Gyrodinium_dominans
OTU_311	0	0	0.000341935	0.0004165	0.00035968	0.000429258	0	0	0	2.43e-05	0	0	0.000227865	0.00499923	0	0.00227571	0.000261945	5.31e-05	0	0	0	0	0	1.43e-05	0	0	0	0	0	0	0	1.81e-05	0	1.74e-05	9.67e-05	0	0	Eukaryota	Alveolata	Ciliophora	Spirotrichea	Strombidiida	Tontoniidae_B	Tontoniidae_B_X_sp.
OTU_6958	0	0	0.000301708	0.0004165	0	5.67e-05	0	0	0	0	0	6.92e-05	5.7e-05	0.000138867	0	6.15e-05	0	0	0	0	0	0	0	0	0	3.36e-05	0	0	0	4.19e-05	2.77e-05	0.000343233	0	0.000261648	0	1.7e-05	0	Eukaryota	Alveolata	Dinoflagellata	Dinophyceae	Dinophyceae_unclassified	Dinophyceae_unclassified	Dinophyceae_unclassified
OTU_7690	0.000389536	0.000494627	0.00026148	0.0004165	0	0	0	0	0	0	0	0	0	0	0	0	0	0	0	0	0	0	0	0	0	0	0	0	0	0	0	0	0	0	0	0	0	Eukaryota	Opisthokonta	Choanoflagellida	Choanoflagellatea	Craspedida	Monosigidae_Group_A	Monosiga_ovata
OTU_9155	0.00629251	0.0166599	0.000181025	0.0004165	0	0	0	0	0.000279646	0.000242707	0.000139256	0	0	0	0	0	0	0	0.0200176	0.0108436	0.00199513	0.00158479	0	0.000243414	0	0	1.73e-05	0	1.55e-05	0	0	0	0	0	1.61e-05	0	0	Eukaryota	Alveolata	Ciliophora	Spirotrichea	Choreotrichida	Strobilidiidae_B	Strobilidiidae_B_X_sp.
OTU_1135	0.00314626	0.00948784	0.000140797	0.0004165	0	1.62e-05	0	0	0.00164991	0.011213	0	0	0	0	0	0	0	0	0	0.000159252	0.000256255	0	0	0	0	0	0	0	0	0	0	0	0	0	0	0	0	Eukaryota	Alveolata	Ciliophora	Spirotrichea	Strombidiida_A	Strombidiida_A_X	Strombidiida_A_XX_sp.
OTU_2155	0	0	0.000885009	0.000399146	3e-05	8.1e-06	0	0	0	0	0	6.92e-05	5.7e-05	0.000123438	0	4.1e-05	0	0.000318624	0	0	0	0	0.000128673	0	0.000683443	0.000487567	0.000624057	0.000832587	0.00077553	0.00081761	0.000692789	0.000198714	0.000619168	0.000279091	0.000467478	0.00037487	0.000261805	Eukaryota	Alveolata	Ciliophora	Spirotrichea	Strombidiida	Strombidiidae_R	Strombidium_biarmatum
OTU_4109	0	0	0.000824668	0.000399146	3e-05	5.67e-05	0	0	0	0	0	4.61e-05	0	3.09e-05	0	0	0	0	0	0	0	0	0	0	0.00012302	0.000117689	0.00010401	0.000109964	0.000108574	8.39e-05	0.000304827	0	0	8.72e-05	3.22e-05	0.000119277	5.61e-05	Eukaryota	Alveolata	Dinoflagellata	Dinophyceae	Gymnodiniales	Gymnodiniales_unclassified	Gymnodiniales_unclassified
OTU_3475	0	0	0.000703985	0.000399146	3e-05	6.48e-05	0	0	0	0	0	4.61e-05	0.000142416	0.000277735	0	2.05e-05	0	0	0	0	0	0	0	0	0	0	0	0	0	2.1e-05	0	0.000487752	0	0.000470966	0	5.11e-05	0	Eukaryota	Alveolata	Ciliophora	Spirotrichea	Spirotrichea_unclassified	Spirotrichea_unclassified	Spirotrichea_unclassified
OTU_6997	0	0.000247313	0.000583301	0.000399146	0.00287744	0.00289951	0.000496445	0.00108296	1.4e-05	0	0.00632224	0.00597104	0.0101827	0.00919611	0.016561	0.00637609	0.0237846	0.0094525	0	2.9e-05	1.83e-05	9.78e-05	0.000530777	0.000501145	0.00288413	0.0011937	0.00608456	0.0020422	0.00485482	0.0203564	0.00762068	0.00700918	0.0379461	0.0116346	0.0268397	0.0124048	0.0130154	Eukaryota	Archaeplastida	Chlorophyta	Mamiellophyceae	Mamiellales	Mamiellaceae	Micromonas_unclassified
OTU_21664	0	0	0.000422391	0.000399146	8.99e-05	4.05e-05	0.000119147	0.000125926	0	0	0	0.000138325	0	6.17e-05	1.76e-05	4.1e-05	3.49e-05	0	0	0	0	0	0	0	0.000177695	0.000353066	0.000294694	0.00018851	7.76e-05	4.19e-05	0.000166269	5.42e-05	6.63e-05	5.23e-05	0.00011284	0.000136316	0.000130902	Eukaryota	Alveolata	Dinoflagellata	Dinophyceae	Gymnodiniales	Kareniaceae	Kareniaceae_unclassified
OTU_15576	0	0	0.000362049	0.000399146	0.00188832	0.00190331	0.000516303	0.000554072	0	0	0	0.00043803	0.00413005	0.00415059	0.00181466	0.00102509	0.000454037	0.000973572	0	0	3.66e-05	0	0	0	0.000300715	0.00031944	0.000398703	0.000534113	0.000449808	0.000314465	0.000775924	0.000794855	0.000132679	0.000540739	0.000386878	0.00039191	0.000523609	Eukaryota	Alveolata	Dinoflagellata	Dinophyceae	Gymnodiniales	Gymnodiniaceae	Gyrodinium_unclassified
OTU_23041	0	0	0.000221252	0.000399146	0.0013488	0.00142546	0.00123119	0.00113333	0	0	2.79e-05	0.000276651	0.000170899	3.09e-05	0.000246653	0.000205019	0.000296871	1.77e-05	3.26e-05	0	0	3.91e-05	0	1.43e-05	0	5.04e-05	0.000190684	7.85e-05	0.000108574	0.000104822	0.000277116	0.000198714	0.00035381	0.000156989	0.000838236	0.000340791	0.00173913	Eukaryota	Alveolata	Dinoflagellata	Dinophyceae	Peridiniales	Thoracosphaeraceae	Thoracosphaeraceae_unclassified
OTU_23301	0	0	0.000181025	0.000399146	0.00137877	0.000647936	0.000417014	0.000226666	0	0	0	0.000276651	8.54e-05	0.00052461	0	0.000984091	0.000855686	0.000477935	0	0	1.83e-05	0	0	0	0.000369059	0.00050438	0.000953421	0.00117819	0.000186127	0.000419287	0.000249404	0.00222198	0.000154792	0.00160477	0.000483598	0.00166988	0.000205704	Eukaryota	Alveolata	Dinoflagellata	Dinophyceae	Gymnodiniales	Gymnodiniaceae	Gyrodinium_helveticum
OTU_881	0	0	0.000100569	0.000399146	0.00062944	0.000267274	0.00232336	0.00110815	2.8e-05	0	0.000139256	0.000207488	0.000327556	0.000339454	0.00128612	0.000594555	0.00186854	0.000991273	0	0	1.83e-05	0	0	0	2.73e-05	0.00031944	0.000797407	0.000314184	0.000837573	0.000524109	0.00127473	0.000830985	0.000663394	0.00188386	0.000564198	0.00115869	0.00112202	Eukaryota	Opisthokonta	Choanoflagellida	Choanoflagellatea	Acanthoecida	Stephanoecidae_Group_D	Stephanoecidae_Group_D_X_sp.
OTU_5580	0	4.5e-05	6.03e-05	0.000399146	0.000149867	0.000332067	0.00262123	0.00198962	0	4.85e-05	0	0.000507193	0	0.000123438	1.76e-05	4.1e-05	1.75e-05	0.000177013	0	0	0	0	0	0	0	1.68e-05	0.000606722	0.00018851	0.000542871	4.19e-05	0.000332539	0.000957439	4.42e-05	0.00247693	0.000499718	0.00158468	0.00127162	Eukaryota	Alveolata	Ciliophora	Spirotrichea	Strombidiida	Strombidiidae_M	Strombidiidae_M_unclassified
OTU_3424	0.00839002	0.0102523	0.000663757	0.000381792	0	0	0	0	0.000111858	0.00368914	0.00259017	0.000414976	2.85e-05	1.54e-05	5.29e-05	0	5.24e-05	0	9.78e-05	0.000521188	0.00107993	0.000430436	8.04e-05	0	1.37e-05	0	0	1.57e-05	1.55e-05	0	0	0	0	0	0	0	0	Eukaryota	Hacrobia	Cryptophyta	Cryptophyceae	Cryptophyceae_X	Basal_Cryptophyceae-1	Basal_Cryptophyceae-1_X_sp.
OTU_294	0	8.99e-05	0.000563188	0.000381792	0.00167851	0.00131207	0.000218436	0.000705183	1.4e-05	0	0.00423339	0.00401143	0.00683595	0.00757599	0.0118217	0.00504346	0.0157691	0.00692121	0	1.45e-05	0	5.87e-05	0.000434272	0.000243414	0.00170861	0.00075657	0.00483644	0.00157092	0.00324172	0.0133962	0.00557003	0.00496784	0.0249878	0.00811108	0.0184734	0.00826418	0.00946237	Eukaryota	Archaeplastida	Chlorophyta	Mamiellophyceae	Mamiellales	Mamiellaceae	Micromonas_polaris
OTU_6237	0	0	0.000442505	0.000381792	0.0031472	0.00575853	0.000595735	0.000251851	0	0	0	0.000115271	0.000199382	0.000154297	0.00081043	0.000717566	0.00099539	8.85e-05	0	0	0	0	0	0	8.2e-05	0.000218565	0.000416038	0.000251347	0.000573893	0.000440252	0.00177354	0.000560012	0.000508602	0.00134312	0.000386878	0.00109053	0.00102852	Eukaryota	Opisthokonta	Choanoflagellida	Choanoflagellatea	Acanthoecida	Stephanoecidae_Group_D	Stephanoecidae_Group_D_X_sp.
OTU_2342	0	0	0.000422391	0.000381792	0.000749333	0.000793722	0	2.52e-05	0	0	0	0	5.7e-05	1.54e-05	0	0	0	0	0	0	0	0	0	0	0	3.36e-05	6.93e-05	3.14e-05	4.65e-05	0.000146751	0.000110846	0.00084905	0	0.000523295	1.61e-05	6.82e-05	3.74e-05	Eukaryota	Alveolata	Ciliophora	Spirotrichea	Spirotrichea_unclassified	Spirotrichea_unclassified	Spirotrichea_unclassified
OTU_22158	0	0	0.000402277	0.000381792	0.000299733	0.00040496	0.000853886	0.00105777	0	0	5.57e-05	0.00016138	0.000113933	0.000354884	0.000211416	0.000164015	0.000593741	0	0	0	0	0	0	0	0	5.04e-05	0.000242689	3.14e-05	4.65e-05	6.29e-05	5.54e-05	9.03e-05	0.000110566	0.000122102	0.000161199	0.000102237	0.000299205	Eukaryota	Alveolata	Dinoflagellata	Dinophyceae	Dinophyceae_unclassified	Dinophyceae_unclassified	Dinophyceae_unclassified
OTU_725	0.00353579	0.00330501	0.000362049	0.000381792	0	0	0	0	0.000167788	0.00211155	0.00378777	0.000530247	1.42e-05	0	0	0	0	0	0	0.000839691	0	0	0	0	0	0	0	0	0	0	0	0	0	0	0	0	0	Eukaryota	Stramenopiles	Ochrophyta	Chrysophyceae	Chrysophyceae_X	Chrysophyceae_Clade-E	Chrysophyceae_Clade-E_unclassified
OTU_7614	0	0	0.000341935	0.000381792	0.000119893	8.1e-05	1.99e-05	5.04e-05	0	0	0	2.31e-05	0	0	0	4.1e-05	0	5.31e-05	0	0	0	0	0	0	0	6.73e-05	0	0	0	0	0	1.81e-05	0	5.23e-05	3.22e-05	3.41e-05	5.61e-05	Eukaryota	Alveolata	Ciliophora	Ciliophora_X	Ciliophora_XX	Ciliophora_XXX	Mesodinium_rubrum
OTU_4280	0	0	0.000341935	0.000381792	0.000509547	0.000429258	9.93e-05	0.000176296	0	0	0	0.000138325	1.42e-05	9.26e-05	0	0.000205019	1.75e-05	1.77e-05	0	0	0	0	1.61e-05	0	0.00012302	0.000218565	0.000208019	0.000109964	7.76e-05	0.000125786	5.54e-05	0.0010297	0	0.000941932	6.45e-05	0.000306712	5.61e-05	Eukaryota	Alveolata	Dinoflagellata	Dinophyceae	Gymnodiniales	Gymnodiniaceae	Gyrodinium_unclassified
OTU_766	0	4.5e-05	0.000301708	0.000381792	0.00113899	0.00133637	0.00444815	0.00569184	0	0	0.000306364	0.00262818	0.000213623	0.000339454	0.00017618	0.00102509	0.000873149	0.000654948	0	0	0	0	1.61e-05	0	4.1e-05	0.000437129	0.00272158	0.000471276	0.000651446	0.000293501	0.00108075	0.000307103	0.00176905	0.00071517	0.00335295	0.00124389	0.00618981	Eukaryota	Alveolata	Dinoflagellata	Dinophyceae	Dinophyceae_unclassified	Dinophyceae_unclassified	Dinophyceae_unclassified
OTU_684	0	8.99e-05	0.000241366	0.000381792	0.00128885	0.00214629	0.000714881	0.000579258	1.4e-05	4.85e-05	0.000362067	0.00456474	0.00679323	0.00598673	0.00250176	0.0065196	0.00118748	0.002726	3.26e-05	0	0	3.91e-05	0.000418188	0	0.000410066	0.00176533	0.00105743	0.000958261	0.00763122	0.000922432	0.00468326	0.000993569	0.00214497	0.00162222	0.00140243	0.00364646	0.00267415	Eukaryota	Alveolata	Dinoflagellata	Dinophyceae	Gymnodiniales	Gymnodiniaceae	Gymnodiniaceae_unclassified
OTU_21559	0	0	0.000221252	0.000381792	5.99e-05	0.000113389	3.97e-05	0.00010074	0	0	0	0	2.85e-05	4.63e-05	0	0	1.75e-05	0	0	0	0	0	0	0	0	3.36e-05	0	0	0	2.1e-05	2.77e-05	0	0	0	0	1.7e-05	0	Eukaryota	Alveolata	Dinoflagellata	Dinophyceae	Dinophyceae_unclassified	Dinophyceae_unclassified	Dinophyceae_unclassified
OTU_201	0.00272675	0.00676739	0.000120683	0.000381792	0	0.00143356	0	0	0.000741062	0.00310664	5.57e-05	0	0	0	0	0	0	0	0.00267336	0.000332981	0.00668094	0.00168261	0	0	4.1e-05	0	0	0	0	0	0	0	0	0	0	0	0	Eukaryota	Alveolata	Ciliophora	CONTH_4	CONTH_4_X	CONTH_4_XX	CONTH_4_XXX_sp.
OTU_2039	0	4.5e-05	0.000120683	0.000381792	0.00155861	0.00275373	9.93e-05	0	0	0	0	0.000115271	0.000356039	0.000493751	0	0.00192718	8.73e-05	0	0	0	0	0	0	0	1.37e-05	0	0.00010401	0	0.000124085	0	0.000166269	0	0	0.000401193	9.67e-05	0.000204475	5.61e-05	Eukaryota	Alveolata	Dinoflagellata	Dinophyceae	Dinophyceae_unclassified	Dinophyceae_unclassified	Dinophyceae_unclassified
OTU_830	0	0	2.01e-05	0.000381792	0.00035968	0.000178182	0.00119147	0.00294666	0	0	0	2.31e-05	0	0.000262305	0	0	3.49e-05	0	0	0	0	0	0	0	0	0	0	0	0	0	0	9.03e-05	0	1.74e-05	0	0	0	Eukaryota	Alveolata	Ciliophora	Spirotrichea	Choreotrichida	Leegaardiellidae_B	Leegaardiella_sp.
OTU_398	0.000868966	0.000427177	0	0.000381792	0	0	0	0	0.000866903	2.43e-05	0	0	0	0	0	0	0	0	0.00707463	0	0.0153936	0.0028174	0	0	0.000109351	0	0.000260024	0.000141383	0.000201638	0	0	0	0	1.74e-05	0	0	0	Eukaryota	Alveolata	Ciliophora	Litostomatea	Litostomatea_X	Litostomatea_XX	Litostomatea_XXX_sp.
OTU_2870	0	0	0.000563188	0.000364438	0.000419627	0.000178182	0	2.52e-05	0	0	0	0	4.27e-05	1.54e-05	0	0	0	1.77e-05	0	1.45e-05	0.000201344	9.78e-05	0	1.43e-05	0	0	0	0	0	0	0	0	0	0	0	0	0	Eukaryota	Hacrobia	Cryptophyta	Cryptophyceae	Cryptophyceae_X	Cryptomonadales	Cryptomonadales_unclassified
OTU_15839	0	0	0.000482732	0.000364438	0.000389653	0.00216249	0	0	0	0	0	0.000253596	0.000669354	7.71e-05	0.000193798	0.000348532	0.000209556	7.08e-05	0	0	0	0	0	0	0	0	0	0	0	0	0	0	4.42e-05	0	0	3.41e-05	0	Eukaryota	Stramenopiles	Ochrophyta	Bacillariophyta	Bacillariophyta_X	Polar-centric-Mediophyceae	Chaetoceros_decipiens
OTU_4719	0	0	0.000422391	0.000364438	8.99e-05	4.86e-05	5.96e-05	7.56e-05	0	0	0	0.000138325	2.85e-05	6.17e-05	0	2.05e-05	0	5.31e-05	0	0	0	0	4.83e-05	1.43e-05	0	8.41e-05	8.67e-05	0	3.1e-05	4.19e-05	0.000138558	1.81e-05	4.42e-05	3.49e-05	4.84e-05	0	1.87e-05	Eukaryota	Alveolata	Dinoflagellata	Dinophyceae	Gymnodiniales	Gymnodiniaceae	Gymnodiniaceae_unclassified
OTU_1185	0.0152219	0.0148163	0.000362049	0.000364438	0	0	0	0	0.00243292	0.00832484	0.000362067	0	0	1.54e-05	0	0	0	0	0.000130408	7.24e-05	0.000329471	5.87e-05	0	0	0	0	0	0	0	0	0	0	0	0	0	0	0	Eukaryota	Alveolata	Dinoflagellata	Dinophyceae	Dinophyceae_unclassified	Dinophyceae_unclassified	Dinophyceae_unclassified
OTU_6015	0	0	0.000321822	0.000364438	0	3.24e-05	0	0	0	0	0	0	0	0	0	0	0	0	0	0	0	0	0	0	0	0	0	0	0	0	0	0	0	0	0	0	0	Eukaryota	Hacrobia	Katablepharidophyta	Katablepharidaceae	Katablepharidales	Katablepharidales_X	Leucocryptos_unclassified
OTU_313	0.000179786	0.00022483	0.000221252	0.000364438	0.000329707	0.000194381	1.99e-05	0	0	0	0	0	1.42e-05	0	0	0	0	0	0	0	7.32e-05	0	0	0	0	0	0	0	0	0	0	0	0	0	0	0	0	Eukaryota	Hacrobia	Telonemia	Telonemia_X	Telonemia_XX	Telonemia-Group-2	Telonemia-Group-2_X_sp.
OTU_419	0.000868966	0.00186609	6.03e-05	0.000364438	0	0	0	0	9.79e-05	9.71e-05	0	0	0	0	0	0	0	0	0.00032602	0	0.000933502	0.000176087	0.000225178	0	9.57e-05	0	1.73e-05	0	6.2e-05	0	0	0	0	0	0	0	0	Eukaryota	Alveolata	Ciliophora	Litostomatea	Litostomatea_X	Litostomatea_XX	Litostomatea_XX_unclassified
OTU_3532	3e-05	0	0.000603415	0.000347084	3e-05	0.00010529	0	0	0	0	0	0.000138325	2.85e-05	6.17e-05	0	0	0	5.31e-05	0	0	0	0	0	0	0.000232371	0.000638881	0.000329364	0.000157092	0.000372255	0.000125786	0.000775924	0.000144519	8.85e-05	0.000244205	0.000161199	0.000238554	0.000130902	Eukaryota	Alveolata	Alveolata_unclassified	Alveolata_unclassified	Alveolata_unclassified	Alveolata_unclassified	Alveolata_unclassified
OTU_1630	0	0	0.000543074	0.000347084	5.99e-05	4.86e-05	0	0	0	0	0	0	0	0	0	0	0	5.31e-05	0	0	0	0	0	0	0.000232371	0.000386691	0.000433373	0.000596949	0.000217149	0.000104822	0.000110846	9.03e-05	0	0.000348864	4.84e-05	0.000153356	1.87e-05	Eukaryota	Alveolata	Dinoflagellata	Dinophyceae	Gymnodiniales	Gymnodiniaceae	Gymnodiniaceae_unclassified
OTU_854	0	0	0.000543074	0.000347084	0	1.62e-05	0	0	0	0	0	0	0	1.54e-05	0	0	0	0	0	0	0	0	0	0	0.000314384	0	8.67e-05	0.000125674	9.31e-05	0.00113207	0.000110846	0.000289038	0	0	0	0	0	Eukaryota	Alveolata	Dinoflagellata	Syndiniales	Dino-Group-II	Dino-Group-II-Clade-1	Dino-Group-II-Clade-1_X_sp.
OTU_4981	0	0	0.000402277	0.000347084	0.00140875	0.000785622	0.000238294	0.000201481	0	0	2.79e-05	0.000783844	9.97e-05	0.000941213	1.76e-05	0.00168115	0.00153674	0.000849663	0	1.45e-05	0	0	6.43e-05	1.43e-05	0.000628767	0.000857445	0.00154281	0.00215216	0.000480829	0.000649895	0.00113617	0.00191488	8.85e-05	0.00179665	0.000644797	0.00173803	0.000112202	Eukaryota	Alveolata	Dinoflagellata	Dinophyceae	Gymnodiniales	Gymnodiniaceae	Gyrodinium_unclassified
OTU_4241	0	0	0.000362049	0.000347084	0.00230795	0.000874713	0.000238294	0.000277036	0	0	0	0.00016138	0.000242107	0.000216016	1.76e-05	0.000246023	0.00034926	0.00014161	0	0	0	0	0	0	9.57e-05	0.000117689	0.000190684	6.28e-05	3.1e-05	0.000209644	8.31e-05	0.000198714	2.21e-05	0.000191875	0.000128959	0.000357831	1.87e-05	Eukaryota	Alveolata	Dinoflagellata	Dinophyceae	Gymnodiniales	Gymnodiniaceae	Gyrodinium_helveticum
OTU_5286	0	0	0.000362049	0.000347084	0.000419627	0.000170083	1.99e-05	0	0	0	0	2.31e-05	4.27e-05	6.17e-05	0	4.1e-05	3.49e-05	8.85e-05	0	0	3.66e-05	0	0	0	1.37e-05	3.36e-05	0.000138679	0.000219929	6.2e-05	6.29e-05	5.54e-05	0.000505817	6.63e-05	0.000156989	9.67e-05	0.000102237	5.61e-05	Eukaryota	Alveolata	Dinoflagellata	Dinophyceae	Gymnodiniales	Gymnodiniaceae	Gyrodinium_helveticum
OTU_1380	0	0	0.000301708	0.000347084	0.000209813	0.00029967	3.97e-05	0	0	0	0.000194959	9.22e-05	0.000968426	0.000833205	0.00102185	0.00209119	0.00106524	0.000708052	0	0	0	0	0	0	0	1.68e-05	0.000121344	6.28e-05	1.55e-05	0.000104822	0	3.61e-05	2.21e-05	0	0	3.41e-05	0	Eukaryota	Stramenopiles	Ochrophyta	Bacillariophyta	Bacillariophyta_X	Polar-centric-Mediophyceae	Chaetoceros_unclassified
OTU_1296	0	2.25e-05	0.000241366	0.000347084	0.00281749	0.00497291	0.000377299	0.000151111	0	0	2.79e-05	6.92e-05	0.000142416	0.000185157	0.000634249	0.000738068	0.000803297	0.000106208	0	0	0	0	0	0	5.47e-05	0.000336253	0.000294694	0.000329893	0.000728999	0.000440252	0.000914482	0.000560012	0.000530715	0.00118614	0.000370758	0.00114165	0.000785414	Eukaryota	Opisthokonta	Choanoflagellida	Choanoflagellatea	Acanthoecida	Stephanoecidae_Group_D	Stephanoecidae_Group_D_X_sp.
OTU_2075	0	0	0.000221252	0.000347084	0	6.48e-05	0.000357441	0.000629628	0	0	0	2.31e-05	1.42e-05	7.71e-05	1.76e-05	0	0	1.77e-05	0	0	0	0	0	0	2.73e-05	0.000100876	0.000364033	7.85e-05	4.65e-05	2.1e-05	0.000110846	5.42e-05	0.000132679	0.000104659	0.000161199	0.000102237	9.35e-05	Eukaryota	Alveolata	Dinoflagellata	Dinophyceae	Dinophyceae_unclassified	Dinophyceae_unclassified	Dinophyceae_unclassified
OTU_931	0.00140832	0.00209092	0.000181025	0.000347084	0	0	0	0	0	0.000194165	0	0	0	0	0	0	0	0	0	0.000405368	0	0	0	0	0	0	0	0	0	0	0	0	0	0	0	0	0	Eukaryota	Opisthokonta	Opisthokonta_unclassified	Opisthokonta_unclassified	Opisthokonta_unclassified	Opisthokonta_unclassified	Opisthokonta_unclassified
OTU_181	0.00485422	0.00294528	0.000120683	0.000347084	0	0	0	0	0	0	0.00111405	0.00016138	0	0	0	0	0	0	3.26e-05	1.45e-05	0.00113484	0.000254348	0	0	8.2e-05	0	1.73e-05	0	0	0	0	0	0	0	0	0	0	Eukaryota	Rhizaria	Cercozoa	Filosa-Imbricatea	Filosa-Imbricatea_X	Novel-clade-2	Novel-clade-2_X_sp.
OTU_13035	0	0	8.05e-05	0.000347084	8.99e-05	6.48e-05	3.97e-05	0	0	0	0	2.31e-05	1.42e-05	3.09e-05	0	4.1e-05	0	0	0	0	0	0	0	0	0	0	0	0	0	0	0	0	0	0	1.61e-05	0	0	Eukaryota	Alveolata	Ciliophora	Ciliophora_X	Ciliophora_XX	Ciliophora_XXX	Mesodinium_rubrum
OTU_5121	0	0	0.000965465	0.000329729	0	8.1e-06	0	0	0	0	0	0	1.42e-05	0	0	0	0	0	0	0	0	0	4.83e-05	0	0.000191364	0.000453942	0.000277359	0.000282765	0.000310212	6.29e-05	0.000193981	5.42e-05	4.42e-05	1.74e-05	1.61e-05	6.82e-05	0	Eukaryota	Alveolata	Dinoflagellata	Dinophyceae	Dinophyceae_unclassified	Dinophyceae_unclassified	Dinophyceae_unclassified
OTU_8124	0	0	0.000643643	0.000329729	0	1.62e-05	0	0	0	0	0	0	0	0	0	0	0	0	0	0	0	0	0	0	0	0	0	0	0	0	0	0	0	0	0	0	0	Eukaryota	Alveolata	Ciliophora	Spirotrichea	Strombidiida	Strombidiidae_R	Strombidium_biarmatum
OTU_922	0	0	0.000462618	0.000329729	0	4.86e-05	0	0	0	0	5.57e-05	2.31e-05	0.000199382	1.54e-05	0	0	0	0	0	0	1.83e-05	3.91e-05	0.000353851	5.73e-05	0.000205033	0.000353066	6.93e-05	0.000204219	0.00026368	0.000230608	0.000304827	0.000144519	0	3.49e-05	0	5.11e-05	0	Eukaryota	Alveolata	Dinoflagellata	Dinophyceae	Peridiniales	Heterocapsaceae	Heterocapsa_rotundata
OTU_5	0	0	0.000442505	0.000329729	0.00311723	0.00453555	0.000595735	0.000957034	1.4e-05	0	8.36e-05	0.00145242	0.00152385	0.000462892	5.29e-05	0.00260374	3.49e-05	0.000389429	0	0	0	0	0.000241262	0.000143184	0.00146257	0.00110964	0.000710732	0.000204219	0.00162861	0.000461216	0.00113617	0.000451622	0.000398036	0.00118614	0.000660917	0.00105645	0.00213184	Eukaryota	Alveolata	Dinoflagellata	Dinophyceae	Dinophyceae_unclassified	Dinophyceae_unclassified	Dinophyceae_unclassified
OTU_9088	0	0	0.000402277	0.000329729	0.000209813	0.000129587	0	0	0	0	0	0	2.85e-05	0	0	2.05e-05	0	3.54e-05	0	0	0	0	1.61e-05	0	0	0	0	0	1.55e-05	0	0	0	0	0	0	0	1.87e-05	Eukaryota	Hacrobia	Cryptophyta	Cryptophyceae	Cryptophyceae_X	Cryptomonadales	Cryptomonadales_unclassified
OTU_3806	0	0	0.000321822	0.000329729	0.00125888	0.0019762	0.00117161	0.00120889	0	0	0	4.61e-05	2.85e-05	0.000108008	0.000105708	0.00032803	0.000104778	0.000106208	0	0	0	0	0	0	0	5.04e-05	6.93e-05	6.28e-05	0.000108574	2.1e-05	0.000166269	0.000162584	0.000287471	0.000122102	0.000838236	0.000323751	0.00168303	Eukaryota	Alveolata	Dinoflagellata	Dinophyceae	Dinophyceae_unclassified	Dinophyceae_unclassified	Dinophyceae_unclassified
OTU_341	0	0	0.000281594	0.000329729	0.000149867	0.00029967	0.000337583	0.000402962	0	0	0.00022281	0.000207488	0.000128174	4.63e-05	0	0.000123011	0	0.000123909	0	0	0	1.96e-05	1.61e-05	0	1.37e-05	1.68e-05	0.000364033	0.000109964	7.76e-05	6.29e-05	0	0.000126454	2.21e-05	0.000802386	6.45e-05	5.11e-05	1.87e-05	Eukaryota	Alveolata	Ciliophora	Litostomatea	Haptoria_4	Didiniidae	Didiniidae_X_sp.
OTU_1559	0	0	0.00026148	0.000329729	0.00017984	0.000113389	0	0	0	0	2.79e-05	0.000115271	0.000128174	0.000678908	0	6.15e-05	0	0	0	0	0	0	0	0	0	0	0	0	0	6.29e-05	0	5.42e-05	0	0.000122102	0	1.7e-05	0	Eukaryota	Alveolata	Ciliophora	Spirotrichea	Strombidiida_G	Strombidiida_G_X	Strombidiida_G_X_unclassified
OTU_22855	0	0	0.00026148	0.000329729	0.00107904	0.000737027	0.00017872	0.00010074	0	0	2.79e-05	0.00059941	0.000242107	0.00135782	0	0.00186567	0.00162406	0.000973572	0	0	0	0	4.83e-05	0	0.000792794	0.000790195	0.00145613	0.00199507	0.00026368	0.00081761	0.000443385	0.00270973	0.000265358	0.00170943	0.000548078	0.0021129	0.000317906	Eukaryota	Alveolata	Dinoflagellata	Dinophyceae	Gymnodiniales	Gymnodiniaceae	Gymnodiniaceae_unclassified
OTU_321	0.00365565	0.00128153	0.000120683	0.000329729	0	0	0	0	1.4e-05	0.000121353	0	0	0	0	0	0	0	0	0	0	3.66e-05	0	0	0	0	0	0	0	0	0	0	0	0	0	0	0	0	Eukaryota	Stramenopiles	Ochrophyta	Synurophyceae	Synurales	Synurales_X	Mallomonas_unclassified
OTU_685	0.00215743	0.00157381	0.000100569	0.000329729	0	0	0	0	1.4e-05	0.000194165	2.79e-05	0	0	0	0	0	0	0	0	0	9.15e-05	0	0	0	0	0	0	0	0	0	0	0	0	0	0	0	0	Eukaryota	Rhizaria	Cercozoa	Filosa-Imbricatea	Thaumatomonadida	Thaumatomonadida_unclassified	Thaumatomonadida_unclassified
OTU_1860	0.00332604	0.00681236	6.03e-05	0.000329729	0	0	0	0	0	0	0	0	0	0	0	0	0	0	0.000945457	4.34e-05	0.00814526	0.00289566	0	1.43e-05	0	0	5.2e-05	0	3.1e-05	0	0	0	0	0	0	0	0	Eukaryota	Alveolata	Ciliophora	Spirotrichea	Choreotrichida	Strobilidiidae_G	Strobilidiidae_G_X_sp.
OTU_3942	0	0	0.000543074	0.000312375	0.000119893	9.72e-05	1.99e-05	0	0	0	0	4.61e-05	0	7.71e-05	0	2.05e-05	0	3.54e-05	0	0	0	0	0	0	0.000628767	0.000689319	0.000728067	0.000895424	0.00026368	0.000209644	0.000221693	0.000270973	2.21e-05	0.00071517	0.000177319	0.000408949	5.61e-05	Eukaryota	Alveolata	Alveolata_unclassified	Alveolata_unclassified	Alveolata_unclassified	Alveolata_unclassified	Alveolata_unclassified
OTU_4607	0	0	0.000402277	0.000312375	8.99e-05	4.05e-05	0	0	0	0	0	0	0	0.000216016	0	6.15e-05	0	0	0	0	0	0	0	0	0	0	0	0	0	0	0	0	2.21e-05	0	1.61e-05	0	0	Eukaryota	Alveolata	Ciliophora	Spirotrichea	Strombidiida	Tontoniidae_B	Tontoniidae_B_X_sp.
OTU_18528	0.00131843	0.000944287	0.000382163	0.000312375	0	0	0	0	0	0	0	0	0	0	0	0	0	0	0	0	1.83e-05	0	0	0	0	0	0	0	0	0	0	0	0	0	0	0	0	Eukaryota	Opisthokonta	Choanoflagellida	Choanoflagellatea	Craspedida	Monosigidae_Group_A	Monosiga_ovata
OTU_197	0.00476433	0.0046315	0.000241366	0.000312375	0	0	0	0	0.000503363	0.00242707	5.57e-05	0	0	0	0	0	0	0	3.26e-05	0.00133192	0.000237951	1.96e-05	0	0	0	0	0	0	0	0	0	0	0	0	0	0	0	Eukaryota	Stramenopiles	Ochrophyta	Chrysophyceae	Chrysophyceae_X	Chrysophyceae_XX	Chrysophyceae_XXX_sp.
OTU_2189	0	0	0.000221252	0.000312375	0.0004496	0.000477853	0	0	0	0	0	0	8.54e-05	0.000200586	0	0	0	0	0	0	0	0	0	0	0	3.36e-05	3.47e-05	0	0	0.000209644	8.31e-05	0.00077679	0	0.000296534	4.84e-05	6.82e-05	0	Eukaryota	Alveolata	Ciliophora	Spirotrichea	Spirotrichea_unclassified	Spirotrichea_unclassified	Spirotrichea_unclassified
OTU_20587	0	2.25e-05	0.000221252	0.000312375	3e-05	8.1e-06	3.97e-05	0.000125926	0	0	0	2.31e-05	7.12e-05	1.54e-05	0	0	1.75e-05	3.54e-05	0	0	3.66e-05	0	0	0	9.57e-05	5.04e-05	1.73e-05	0.000204219	7.76e-05	0.000146751	2.77e-05	9.03e-05	0	6.98e-05	1.61e-05	5.11e-05	0	Eukaryota	Alveolata	Dinoflagellata	Dinophyceae	Gymnodiniales	Gymnodiniaceae	Gyrodinium_unclassified
OTU_6617	3e-05	0.000112415	0.000201138	0.000312375	0	0	0	0	0	0	0	0	0	0	0	0	0	0	0	0	0	0	0	0	0	0	0	0	0	0	0	0	0	0	0	0	0	Eukaryota	Alveolata	Ciliophora	Spirotrichea	Strombidiida	Strombidiida_unclassified	Strombidiida_unclassified
OTU_808	0	0	0.000160911	0.000312375	0.000149867	0.000364464	0.00111204	0.00667405	0	0	0	9.22e-05	0.000299073	0.000401173	0	0.000225521	0	0.000247818	0	0	0	0	0	0	0.000738118	0.000554818	0.000121344	3.14e-05	0.000108574	0.00121593	0.000110846	0.000234844	0.000199018	0.00129079	0.000644797	0.000886057	0.000411407	Eukaryota	Alveolata	Ciliophora	Spirotrichea	Choreotrichida	Strobilidiidae_A	Strobilidiidae_A_X_sp.
OTU_252	0.00566326	0.00197851	4.02e-05	0.000312375	0	0	0	0	0	0	0	2.31e-05	0	0	0	0	3.49e-05	0	0.03358	0	0.00203174	0.00162392	0.000579029	0	0.000150357	0	0	0	3.1e-05	0	0	0	0	0	0	0	0	Eukaryota	Alveolata	Ciliophora	Spirotrichea	Tintinnida	Tintinnidiidae	Tintinnidium_sp.
OTU_1075	0	0	0	0.000312375	3e-05	0.000153885	0	0	0	0	0	0.000691627	0	0.000648048	7.05e-05	0.00065606	1.75e-05	7.08e-05	0	0	0	0	0	0	0	0	0	0	0	0	0	0	0	0	0	0	0	Eukaryota	Alveolata	Ciliophora	Litostomatea	Haptoria_6	Lacrymariidae	Lacrymariidae_unclassified
OTU_2842	0	0	0.00225275	0.000295021	0.00071936	0.00187091	0	2.52e-05	0	0	0	0	1.42e-05	0	3.52e-05	0.000102509	0	1.77e-05	0	0	0	0	0	0	0	0	0	0	0	2.1e-05	0	0	0	1.74e-05	0	0	1.87e-05	Eukaryota	Stramenopiles	Ochrophyta	Bacillariophyta	Bacillariophyta_X	Polar-centric-Mediophyceae	Chaetoceros_decipiens
OTU_993	0	0	0.000623529	0.000295021	3e-05	1.62e-05	0	0	0	0	0	0	1.42e-05	1.54e-05	0	0	0	3.54e-05	0	0	0	0	1.61e-05	0	0.000218702	0.000285815	0.000312029	0.000534113	0.000310212	0.000209644	0.000193981	1.81e-05	0.000154792	0	0.00011284	3.41e-05	1.87e-05	Eukaryota	Eukaryota_unclassified	Eukaryota_unclassified	Eukaryota_unclassified	Eukaryota_unclassified	Eukaryota_unclassified	Eukaryota_unclassified
OTU_13029	0	0	0.000603415	0.000295021	0.000419627	0.000178182	0.000595735	0.000302221	0	4.85e-05	0.000362067	0.00242069	0.00403036	0.00253047	0.000458069	0.00141463	0.00139704	0.00515108	0	8.69e-05	7.32e-05	0.000273914	0.0010133	0.000615693	0.00133955	0.00200071	0.0024789	0.00251347	0.00243517	0.00419287	0.00440614	0.00379363	0.00400248	0.00179665	0.00312727	0.0016358	0.00216924	Eukaryota	Hacrobia	Cryptophyta	Cryptophyceae	Cryptophyceae_X	Cryptomonadales	Teleaulax_gracilis
OTU_701	0.00599287	0.00442916	0.000563188	0.000295021	0	0	0	2.52e-05	0	0	0	0	4.27e-05	0	7.05e-05	0	0	0	0	0	0	0	0	0	0	0	0	0	0	0	0	0	0	0	0	0	0	Eukaryota	Alveolata	Dinoflagellata	Dinophyceae	Peridiniales	Peridiniales_unclassified	Peridiniales_unclassified
OTU_1041	0	0	0.000462618	0.000295021	0.000299733	0.000153885	0	0	0	0	8.36e-05	0.000230542	0.000413005	0.000262305	1.76e-05	2.05e-05	0	0	0.000489029	2.9e-05	5.49e-05	0	0	0	0	0	0	0	0.000232659	0	0	0	0	0	0	0	0	Eukaryota	Alveolata	Dinoflagellata	Dinophyceae	Dinophyceae_X	Tovelliaceae	Woloszynskia_unclassified
OTU_247	0	0	0.000442505	0.000295021	0	2.43e-05	0	5.04e-05	0	0	0	0.000553301	0	0	0	0	1.75e-05	8.85e-05	0	0	0	3.91e-05	1.61e-05	0	0.000328053	0.000285815	0.000970756	0.000204219	0.000186127	0.000251572	0.000138558	0.000162584	0.00035381	0.000366307	0.000854356	0.000357831	0.000205704	Eukaryota	Alveolata	Ciliophora	Spirotrichea	Strombidiida	Strombidiida_unclassified	Strombidiida_unclassified
OTU_2861	0	0	0.000402277	0.000295021	0	0	0	0	0	0	0	0	0	0	0	0	0	0	0	1.45e-05	0	0	0.000337767	0	8.2e-05	0.000403504	0	4.71e-05	4.65e-05	2.1e-05	0.000110846	0	2.21e-05	1.74e-05	1.61e-05	0	0	Eukaryota	Alveolata	Ciliophora	Spirotrichea	Strombidiida	Strombidiidae_R	Strombidiidae_R_unclassified
OTU_21142	0	0	0.000382163	0.000295021	0.00017984	6.48e-05	1.99e-05	5.04e-05	0	0	0	9.22e-05	5.7e-05	3.09e-05	0	2.05e-05	0	0.00014161	0	0	0	0	0	0	1.37e-05	3.36e-05	1.73e-05	3.14e-05	0	4.19e-05	0.000166269	1.81e-05	0.000154792	3.49e-05	3.22e-05	3.41e-05	1.87e-05	Eukaryota	Alveolata	Dinoflagellata	Dinophyceae	Gymnodiniales	Gymnodiniaceae	Gymnodiniaceae_unclassified
OTU_5409	0	0	0.000341935	0.000295021	0.00062944	0.000153885	0.000615592	0.000226666	0	7.28e-05	0.00147612	0.00334286	0.0114645	0.00723654	0.000757576	0.00293177	0.00286393	0.0150284	0	2.9e-05	0	0.000508697	0.00320075	0.00148912	0.00322585	0.0041191	0.00457642	0.00524687	0.0039552	0.0109853	0.00623511	0.00791242	0.0107028	0.00261648	0.00646409	0.00291376	0.00383357	Eukaryota	Hacrobia	Cryptophyta	Cryptophyceae	Cryptophyceae_X	Cryptomonadales	Teleaulax_gracilis
OTU_23376	0	0	0.000341935	0.000295021	0.00203819	0.000890912	0.000337583	0.000125926	0	0	0	0.000484139	0.000128174	0.00109551	3.52e-05	0.00157865	0.0012748	0.000601844	0	0	0	0	0	0	0.000423735	0.000689319	0.00124811	0.0020422	0.00051185	0.000628931	0.000720501	0.00278199	0.000154792	0.00212807	0.000548078	0.00165284	0.000261805	Eukaryota	Alveolata	Dinoflagellata	Dinophyceae	Dinophyceae_unclassified	Dinophyceae_unclassified	Dinophyceae_unclassified
OTU_4269	0	0	0.000341935	0.000295021	0.000239787	0.000137686	3.97e-05	2.52e-05	0	0	0	0.000138325	0.000170899	0.000123438	0	2.05e-05	0	0.000123909	0	0	0	0	0	0	0	8.41e-05	0.000329364	3.14e-05	1.55e-05	8.39e-05	0.000415674	0.000144519	0.000486489	0	0.000402998	0.000136316	0.000355306	Eukaryota	Alveolata	Dinoflagellata	Dinophyceae	Dinophyceae_unclassified	Dinophyceae_unclassified	Dinophyceae_unclassified
OTU_3430	0	0	0.000281594	0.000295021	0	2.43e-05	0	0	0	0	0	0	1.42e-05	0	0	0	0	0	0	0	0	0	0	0	0.000410066	0.000302628	0.000312029	0.000439857	0.000139595	6.29e-05	5.54e-05	0.000108389	0	0.000191875	9.67e-05	0.000170395	1.87e-05	Eukaryota	Alveolata	Dinoflagellata	Dinophyceae	Gymnodiniales	Gymnodiniaceae	Gymnodiniaceae_unclassified
OTU_5879	0	0	0.00026148	0.000295021	0.000299733	0.000283472	7.94e-05	0.000302221	0	0	0	0	1.42e-05	4.63e-05	0	0	0	8.85e-05	0	0	0	0	0	0	8.2e-05	0.000269003	6.93e-05	6.28e-05	4.65e-05	0	2.77e-05	0.000668401	2.21e-05	0.000540739	0.00011284	0.000170395	5.61e-05	Eukaryota	Alveolata	Dinoflagellata	Dinophyceae	Gymnodiniales	Gymnodiniaceae	Gyrodinium_helveticum
OTU_269	0.00296647	0.00240568	0.00026148	0.000295021	0	0	0	0	0	0	0	0	0	0	0	0	0	0	0	0.000246116	0	0	0	0	0	0	0	0	0	0	0	0	0	0	0	0	0	Eukaryota	Alveolata	Perkinsea	Perkinsida	Perkinsida_X	Perkinsida_XX	Perkinsida_XXX_sp.
OTU_4740	0	0	0.000241366	0.000295021	0.000239787	0.000340166	7.94e-05	0.000302221	0	0	0	6.92e-05	5.7e-05	1.54e-05	1.76e-05	8.2e-05	0.00017463	7.08e-05	0	0	0	0	0	0	0	1.68e-05	0.00010401	9.43e-05	4.65e-05	2.1e-05	5.54e-05	0.000108389	0.000110566	5.23e-05	6.45e-05	6.82e-05	9.35e-05	Eukaryota	Alveolata	Dinoflagellata	Dinophyceae	Dinophyceae_unclassified	Dinophyceae_unclassified	Dinophyceae_unclassified
OTU_3567	3e-05	6.74e-05	0.000181025	0.000295021	0.000929173	0.00121488	0.000158863	0.000201481	1.4e-05	0	0.00242306	0.0024668	0.00371705	0.00404259	0.00577872	0.0032188	0.00843462	0.00380578	0	0	1.83e-05	5.87e-05	0.000176926	0.00018614	0.0010525	0.000453942	0.00286026	0.000801169	0.002187	0.00744235	0.00368564	0.00319748	0.0132458	0.00479687	0.00918836	0.00507779	0.00510519	Eukaryota	Archaeplastida	Chlorophyta	Mamiellophyceae	Mamiellales	Mamiellaceae	Micromonas_unclassified
OTU_174	0.00140832	0.00308017	0.000160911	0.000295021	0	0	0	0	0.00546708	0.0100966	0.0131737	0.000945223	0	0	0	0	3.49e-05	0	0.00016301	0.00112924	0.00450277	0.00135	0.000788123	0.000157503	8.2e-05	1.68e-05	1.73e-05	0	0	0	0	0	0	0	0	0	0	Eukaryota	Archaeplastida	Chlorophyta	Chlorophyceae	Chlamydomonadales	Chlamydomonadales_X	Chlamydomonadales_X_unclassified
OTU_2607	0	0	0.000160911	0.000295021	0.000149867	0.000186282	0	0	0	0	2.79e-05	0	9.97e-05	0.00234532	0	0.00125062	0.000122241	5.31e-05	0	0	0	0	0	2.86e-05	0	0	0	0	0	0	0	1.81e-05	0	0	1.61e-05	0	0	Eukaryota	Alveolata	Ciliophora	Spirotrichea	Strombidiida	Tontoniidae_B	Tontoniidae_B_X_sp.
OTU_1432	0.00203757	0.00240568	0.000140797	0.000295021	0	0	0	0	0.0120947	0.0127178	0.00757555	0.00087606	0	0	0	0	1.75e-05	1.77e-05	0.0125192	0.0842732	0.00662603	7.83e-05	3.22e-05	1.43e-05	2.73e-05	5.04e-05	0.000156014	3.14e-05	6.2e-05	2.1e-05	5.54e-05	1.81e-05	8.85e-05	1.74e-05	3.22e-05	0	1.87e-05	Eukaryota	Hacrobia	Cryptophyta	Cryptophyceae	Cryptophyceae_X	Cryptomonadales	Plagioselmis_nannoplanctica
OTU_597	0	4.5e-05	0.000140797	0.000295021	0.000779306	0.000485952	0.000615592	0.000528887	0	0	0	0.000115271	0.000213623	0.000632618	0	0.00338281	0.000768371	8.85e-05	0	0	0	0	0	0	1.37e-05	0	5.2e-05	3.14e-05	4.65e-05	8.39e-05	0	0.000126454	0	0.000279091	0	6.82e-05	1.87e-05	Eukaryota	Alveolata	Dinoflagellata	Dinophyceae	Dinophyceae_unclassified	Dinophyceae_unclassified	Dinophyceae_unclassified
OTU_82	0.00713151	0.00532848	0.000120683	0.000295021	0	0	0	0	0.00841734	0.0368429	0.00208885	0.000276651	0	0	0	0	3.49e-05	0	0.000880253	0.0351946	0.00162905	0	0	0	1.37e-05	0	0	0	0	0	0	0	0	0	0	0	0	Eukaryota	Stramenopiles	Ochrophyta	Chrysophyceae	Chrysophyceae_X	Chrysophyceae_XX	Chrysophyceae_XXX_sp.
OTU_1930	0.00131843	0.000607042	0.000120683	0.000295021	0	0	0	0	1.4e-05	7.28e-05	0	0	0	0	0	0	0	0	0	2.9e-05	0	0	0	0	0	0	0	0	0	0	0	0	0	0	0	0	0	Eukaryota	Stramenopiles	Ochrophyta	Chrysophyceae	Chrysophyceae_X	Chrysophyceae_Clade-D	Chrysophyceae_Clade-D_X_sp.
OTU_632	0	0	0.000100569	0.000295021	0.000119893	0.00020248	0.000198578	0.000503702	0	0	0.00116975	0.00016138	0.000128174	7.71e-05	8.81e-05	8.2e-05	0	0.000194714	0	0	7.32e-05	1.96e-05	0.000144757	4.3e-05	2.73e-05	1.68e-05	0.000190684	0.000172801	1.55e-05	4.19e-05	0	1.81e-05	0.000132679	0.000418636	9.67e-05	0	1.87e-05	Eukaryota	Alveolata	Ciliophora	Litostomatea	Haptoria_4	Didiniidae	Didiniidae_X_sp.
OTU_4315	0	0	8.05e-05	0.000295021	0.0008992	0.000988102	0.00107232	0.000528887	0	0	2.79e-05	0.00016138	7.12e-05	3.09e-05	8.81e-05	0.000246023	3.49e-05	0	0	0	0	0	0	0	0	6.73e-05	0.000121344	1.57e-05	6.2e-05	6.29e-05	0.000332539	0.000126454	0.000486489	3.49e-05	0.000580318	0.000170395	0.00129032	Eukaryota	Alveolata	Dinoflagellata	Dinophyceae	Dinophyceae_unclassified	Dinophyceae_unclassified	Dinophyceae_unclassified
OTU_16243	0	0	0.000985578	0.000277667	0.000239787	0.000980003	0	0	0	0	0	6.92e-05	8.54e-05	3.09e-05	7.05e-05	6.15e-05	0	0	0	0	0	0	0	0	0	0	0	0	0	0	0	0	0	0	0	0	0	Eukaryota	Stramenopiles	Ochrophyta	Bacillariophyta	Bacillariophyta_X	Polar-centric-Mediophyceae	Chaetoceros_decipiens
OTU_15584	0	0	0.000442505	0.000277667	3e-05	0.00010529	0	2.52e-05	0	0	0	0.000115271	2.85e-05	1.54e-05	0	2.05e-05	0	0	0	0	0	0	0	0	0	0	0	1.57e-05	0	0	0	0	0	0	0	0	0	Eukaryota	Stramenopiles	Ochrophyta	Bacillariophyta	Bacillariophyta_X	Polar-centric-Mediophyceae	Chaetoceros_unclassified
OTU_3899	0	0	0.000402277	0.000277667	0.00137877	0.000826118	0.000139005	0.000125926	0	0	0	0.000184434	5.7e-05	0.000370313	0	0.00100459	0.000419111	0.00026552	0	0	0	0	0	0	0.000314384	0.00025219	0.000502713	0.000926842	9.31e-05	0.000293501	0.000193981	0.00115615	2.21e-05	0.000976818	0.000225679	0.000664542	0.000224404	Eukaryota	Alveolata	Dinoflagellata	Dinophyceae	Dinophyceae_unclassified	Dinophyceae_unclassified	Dinophyceae_unclassified
OTU_6343	0	0	0.000321822	0.000277667	0	0	0	0	0	0	0	2.31e-05	0.000142416	0.000154297	0	0	0	0	0	0	0	0	0	0	0	0	0	0	0	2.1e-05	0	0.000198714	0	3.49e-05	0	1.7e-05	0	Eukaryota	Alveolata	Dinoflagellata	Dinophyceae	Peridiniales	Peridiniales_unclassified	Peridiniales_unclassified
OTU_60	0.00161807	0.00134898	0.000281594	0.000277667	0	0	0	0	0.00141221	0.0125479	0.00220025	0.000207488	0	0	1.76e-05	0	0	0	0.000130408	0.000202684	0.000201344	5.87e-05	0	0	0	0	0	0	0	0	0	0	0	0	0	0	0	Eukaryota	Stramenopiles	Ochrophyta	Chrysophyceae	Chrysophyceae_X	Chrysophyceae_Clade-D	Chrysophyceae_Clade-D_X_sp.
OTU_1207	0	0	0.000221252	0.000277667	0.00227797	0.00228397	0.000337583	0.000402962	0	0	0	0.000507193	2.85e-05	0.000262305	0	0.00305478	0.000227019	0.000690351	0	0	0	0	0	0	0.000259708	0.00057163	0.000329364	0.000675495	0.000434297	0.000230608	0.000443385	0.00119228	0.000154792	0.00221528	0.000435238	0.00151652	0.000392707	Eukaryota	Alveolata	Dinoflagellata	Dinophyceae	Dinophyceae_unclassified	Dinophyceae_unclassified	Dinophyceae_unclassified
OTU_2032	0	2.25e-05	0.000221252	0.000277667	0.00071936	0.00123108	0.000615592	0.000377777	0	0	5.57e-05	4.61e-05	0.000427247	0.000339454	3.52e-05	0.000615057	8.73e-05	3.54e-05	0	0	0	0	0	0	4.1e-05	0	1.73e-05	3.14e-05	0	2.1e-05	0	1.81e-05	0	5.23e-05	1.61e-05	8.52e-05	5.61e-05	Eukaryota	Alveolata	Dinoflagellata	Dinophyceae	Dinophyceae_unclassified	Dinophyceae_unclassified	Dinophyceae_unclassified
OTU_1332	0	0	0.000181025	0.000277667	0.00287744	0.00545076	0	0	0	0	0	0	0	0	0	0	0	0	0	0	0	0	0	0	0	0	0	0	0	0	0	0	0	0	0	0	0	Eukaryota	Alveolata	Ciliophora	CONTH_8	CONTH_8_X	CONTH_8_XX	CONTH_8_XXX_sp.
OTU_645	0	0	0.000160911	0.000277667	3e-05	0.00029967	0	2.52e-05	0	0	0	2.31e-05	0.000199382	0.000185157	1.76e-05	0.000184517	1.75e-05	1.77e-05	0	0	0	0	0	0	0	0	0	0	0	4.19e-05	0	3.61e-05	0	0	0	0	0	Eukaryota	Alveolata	Dinoflagellata	Dinophyceae	Peridiniales	Protoperidiniaceae	Protoperidinium_sp.
OTU_1414	0	0	0.000160911	0.000277667	0.00035968	0.000485952	0	0	0	0	0	0	0	1.54e-05	1.76e-05	0	0	0	0	0	0	0	0	0	0	0	0	0	0	0	0	0	0	0	0	0	0	Eukaryota	Hacrobia	Katablepharidophyta	Katablepharidaceae	Katablepharidales	Katablepharidales_X	Leucocryptos_unclassified
OTU_249	0.00164804	0.000809389	0.000160911	0.000277667	0	0	0	0	0.000755044	0.00288821	0.00022281	2.31e-05	1.42e-05	0	1.76e-05	0	0	0	0	0.000897601	1.83e-05	0	0	0	0	0	0	0	0	0	0	0	0	0	0	0	0	Eukaryota	Stramenopiles	Ochrophyta	Chrysophyceae	Chrysophyceae_X	Chrysophyceae_Clade-C	Chrysophyceae_Clade-C_X_sp.
OTU_344	0.0115063	0.000359728	0.000120683	0.000277667	0	0	0	0	0	0	0	0	0	0	0	0	0	0	0	0	0.000201344	3.91e-05	0	2.86e-05	0	0	0	0	0	0	0	0	0	0	0	0	0	Eukaryota	Alveolata	Ciliophora	Phyllopharyngea	Suctoria	Suctoria_unclassified	Suctoria_unclassified
OTU_15568	0	0	0.000120683	0.000277667	0.000509547	0.000664134	0.00436872	0.00171259	0	0	0	0.000414976	7.12e-05	0.000246875	7.05e-05	0.00168115	0.000488963	0.000177013	0	0	0	0	0	0	0	8.41e-05	6.93e-05	3.14e-05	1.55e-05	4.19e-05	5.54e-05	0.000180649	6.63e-05	0.000279091	0.000145079	0.000255593	7.48e-05	Eukaryota	Alveolata	Dinoflagellata	Dinophyceae	Dinophyceae_unclassified	Dinophyceae_unclassified	Dinophyceae_unclassified
OTU_4661	0	0	0.000120683	0.000277667	0.000389653	0.000372563	0.000238294	0.000176296	0	0	0	0	2.85e-05	1.54e-05	0	0.000102509	5.24e-05	1.77e-05	0	0	0	0	0	0	1.37e-05	0.000168127	0.00010401	3.14e-05	6.2e-05	8.39e-05	2.77e-05	0.000325168	4.42e-05	0.000209318	6.45e-05	0.000272633	1.87e-05	Eukaryota	Alveolata	Dinoflagellata	Dinophyceae	Gymnodiniales	Gymnodiniaceae	Gyrodinium_helveticum
OTU_2877	0.00314626	0.00143891	8.05e-05	0.000277667	0	0	0	0	0	0	0.00086339	0.000276651	0	0	0	0	0	0	0	0	0.000677246	0.000313044	0	0	4.1e-05	0	5.2e-05	0	0	0	0	0	0	0	0	0	0	Eukaryota	Rhizaria	Cercozoa	Filosa-Imbricatea	Filosa-Imbricatea_X	Novel-clade-2	Novel-clade-2_X_sp.
OTU_3010	0	0	4.02e-05	0.000277667	3e-05	0.000251075	3.97e-05	2.52e-05	0	0	0	0.000345813	2.85e-05	1.54e-05	0	0.00043054	0	0.00014161	0	0	0	0	1.61e-05	0	8.2e-05	0.000420316	3.47e-05	3.14e-05	0.000310212	0.000104822	0.000138558	1.81e-05	0	0.000261648	1.61e-05	0.000119277	0.000205704	Eukaryota	Alveolata	Dinoflagellata	Dinophyceae	Gymnodiniales	Gymnodiniales_unclassified	Gymnodiniales_unclassified
OTU_933	0	0	0.000623529	0.000260313	0	8.1e-06	0	0	0	0	2.79e-05	6.92e-05	4.27e-05	4.63e-05	7.05e-05	0	1.75e-05	5.31e-05	0	0	0	0	3.22e-05	0	0.000492079	0.000521192	0.000468043	0.000486985	0.000403276	0.000628931	0.00052652	5.42e-05	0.000309584	0.000401193	0.000435238	0.000528226	0.000224404	Eukaryota	Alveolata	Ciliophora	Spirotrichea	Strombidiida	Strombidiidae_R	Strombidium_R_unclassified
OTU_4260	0	0	0.000623529	0.000260313	0.00155861	0.000623638	0	2.52e-05	0	0	0	2.31e-05	1.42e-05	1.54e-05	0	2.05e-05	0	0	0	0	3.66e-05	0	0	0	0	0	1.73e-05	0	0	0	0	0	0	1.74e-05	0	0	0	Eukaryota	Hacrobia	Cryptophyta	Cryptophyceae	Cryptophyceae_X	Cryptomonadales	Teleaulax_amphioxeia
OTU_4232	0	0	0.000563188	0.000260313	0	0	0	0	0	0	0	0	0	0	0	0	0	0	0	0	0	0	0	0	4.1e-05	0.000100876	5.2e-05	0.000109964	0.000155106	6.29e-05	0.000110846	0	0	0	4.84e-05	5.11e-05	1.87e-05	Eukaryota	Alveolata	Ciliophora	Spirotrichea	Strombidiida	Strombidiidae_R	Strombidium_biarmatum
OTU_357	0	0	0.000442505	0.000260313	0.000209813	5.67e-05	0	0	0	0	0	0	0.000954185	0.000200586	0.000563777	0	6.99e-05	0	0	0	0	0	0	1.43e-05	0.000109351	5.04e-05	8.67e-05	0.000125674	0.000170617	0.00033543	0.000110846	0.000487752	6.63e-05	0.000156989	6.45e-05	0.000170395	0	Eukaryota	Archaeplastida	Chlorophyta	Pyramimonadales	Pyramimonadales_X	Pyramimonadales_XX	Pyramimonas_australis
OTU_3754	0	0	0.000341935	0.000260313	0.00206816	0.00337737	0.000516303	0.000402962	0	0	0.00044562	0.00652434	0.00850222	0.00791545	0.00332981	0.00641709	0.000960464	0.00431912	0.000228214	0	3.66e-05	0	0.000723787	1.43e-05	0.000232371	0.00243784	0.0018375	0.00105252	0.0105007	0.00157233	0.00570859	0.00108389	0.0025209	0.00265136	0.00220843	0.0051289	0.00374006	Eukaryota	Alveolata	Dinoflagellata	Dinophyceae	Gymnodiniales	Gymnodiniaceae	Gyrodinium_unclassified
OTU_23365	0	0	0.000341935	0.000260313	0.00062944	0.000494051	0.000139005	0.000226666	0	0	0	0.000322759	5.7e-05	0.000462892	1.76e-05	0.000779072	0.000681056	0.000336325	0	0	0	0	0	0	0.000314384	0.000403504	0.000710732	0.000848296	0.000139595	0.000398323	0.000110846	0.0013368	4.42e-05	0.00108148	0.000193439	0.00122685	0.000130902	Eukaryota	Alveolata	Dinoflagellata	Dinophyceae	Dinophyceae_unclassified	Dinophyceae_unclassified	Dinophyceae_unclassified
OTU_1925	0.00425494	0.00681236	0.000321822	0.000260313	0	0	0	0	4.19e-05	0.000242707	0.00119761	4.61e-05	0	0	0	0	0	0	0	0	0	0	0	0	0	0	0	0	0	0	0	0	0	0	0	0	0	Eukaryota	Rhizaria	Cercozoa	Cercozoa_unclassified	Cercozoa_unclassified	Cercozoa_unclassified	Cercozoa_unclassified
OTU_22255	0	6.74e-05	0.000301708	0.000260313	0.00053952	0.000332067	0.00226379	0.0033748	1.4e-05	0	0.000278513	0.00225931	0.000213623	0.000385743	0.000123326	0.000553551	0.000750908	0.000654948	0	0	1.83e-05	0	0	0	1.37e-05	0.000353066	0.00171616	0.000314184	0.000573893	4.19e-05	0.000831347	0.000108389	0.00103932	0.000558182	0.00162811	0.000732701	0.00243104	Eukaryota	Alveolata	Dinoflagellata	Dinophyceae	Dinophyceae_unclassified	Dinophyceae_unclassified	Dinophyceae_unclassified
OTU_6859	0	0	0.000281594	0.000260313	0.00071936	0.000121488	3.97e-05	2.52e-05	0	0	0	0	0	7.71e-05	0	2.05e-05	1.75e-05	0	0	0	1.83e-05	0	0	0	2.73e-05	1.68e-05	1.73e-05	7.85e-05	1.55e-05	8.39e-05	0	0.000234844	0	0.000122102	4.84e-05	3.41e-05	0	Eukaryota	Alveolata	Dinoflagellata	Dinophyceae	Gymnodiniales	Gymnodiniaceae	Gyrodinium_helveticum
OTU_19079	0	0	0.000241366	0.000260313	0	4.05e-05	0	0	0	0	0	4.61e-05	8.54e-05	0.000185157	0	8.2e-05	0	1.77e-05	0	0	0	0	0	0	0	6.73e-05	0	0	0	4.19e-05	0	0.000126454	0	0.000279091	0	5.11e-05	0	Eukaryota	Alveolata	Ciliophora	Spirotrichea	Strombidiida_E	Strombidiida_E_X	Strombidiida_E_XX_sp.
OTU_22924	0	0	0.000221252	0.000260313	0.000659413	0.000396861	0.000119147	5.04e-05	0	0	0	0.000461084	4.27e-05	0.000462892	0	0.00100459	0.000803297	0.000442533	0	0	0	0	1.61e-05	0	0.000437403	0.000487567	0.00116144	0.00078546	0.000279191	0.000419287	0.000277116	0.00168004	0.000132679	0.00127335	0.000145079	0.00112461	0.000168303	Eukaryota	Alveolata	Dinoflagellata	Dinophyceae	Gymnodiniales	Gymnodiniaceae	Gyrodinium_helveticum
OTU_3026	0	0	0.000201138	0.000260313	0	8.1e-06	0	0	0	0	0	0	0	0	0	0	0	0	0	0	0	0	0	0	0	0	0	0	0	0	0	1.81e-05	0	5.23e-05	0	0	0	Eukaryota	Alveolata	Ciliophora	Spirotrichea	Strombidiida	Strombidiida_unclassified	Strombidiida_unclassified
OTU_1040	0	2.25e-05	0.000201138	0.000260313	0.00551509	0.00395241	7.94e-05	0.000151111	0	0	0	0.000115271	0.00568238	0.00569357	8.81e-05	0.00260374	0.000454037	0	0	0	1.83e-05	0	0	0	0	0.000420316	1.73e-05	0	0	6.29e-05	0.000193981	0.000234844	0	6.98e-05	0	6.82e-05	1.87e-05	Eukaryota	Eukaryota_unclassified	Eukaryota_unclassified	Eukaryota_unclassified	Eukaryota_unclassified	Eukaryota_unclassified	Eukaryota_unclassified
OTU_5586	0.000269679	4.5e-05	0.000160911	0.000260313	0	0	0	0	0.000125841	0.000339789	0.000139256	0	0	1.54e-05	0	0	0	0	0	4.34e-05	3.66e-05	0	0	0	0	0	0	0	0	0	0	0	0	0	0	0	0	Eukaryota	Stramenopiles	Ochrophyta	Chrysophyceae	Chrysophyceae_X	Chrysophyceae_Clade-C	Chrysophyceae_Clade-C_unclassified
OTU_440	0	0	0.000140797	0.000260313	0.00062944	0.000728928	0	0	0	0	0	4.61e-05	0.00106812	0.000601759	0.000193798	2.05e-05	0	0	0	0	0	0	0	0	0	0	0	0	0	0	0	0	0	0	0	1.7e-05	0	Eukaryota	Rhizaria	Cercozoa	Filosa-Thecofilosea	Cryomonadida	Protaspa-lineage	Protaspa-lineage_X_sp.
OTU_3338	0	0	0.000140797	0.000260313	0.0004496	0.00108529	3.97e-05	0	0	0	0	6.92e-05	0.000256348	0.000200586	0	0.000943087	5.24e-05	0	3.26e-05	0	0	0	0	0	0	0	1.73e-05	0	7.76e-05	0	5.54e-05	0	0	0.000104659	0	0	0	Eukaryota	Alveolata	Dinoflagellata	Dinophyceae	Gymnodiniales	Gymnodiniaceae	Gymnodiniaceae_unclassified
OTU_68	0	0	0.000140797	0.000260313	8.99e-05	0.000137686	9.93e-05	0	0	0	0	0.000668572	0.00106812	0.000894924	0.000916138	0.0010456	0.000908075	0.00026552	0	0	0	0	0	0	0	1.68e-05	5.2e-05	0	0.000341233	6.29e-05	0	5.42e-05	6.63e-05	3.49e-05	0	0.000221514	9.35e-05	Eukaryota	Stramenopiles	Stramenopiles_X	Stramenopiles_X-Group-7	Stramenopiles_X-Group-7_X	Stramenopiles_X-Group-7_XX	Stramenopiles_X-Group-7_XXX_sp.
OTU_21671	0	0	8.05e-05	0.000260313	0.000149867	0.000469754	0.00212479	0.000679998	0	0	2.79e-05	9.22e-05	0.000113933	0.000185157	1.76e-05	0.000184517	0.000366723	3.54e-05	0	0	0	0	1.61e-05	0	0	1.68e-05	0.000121344	1.57e-05	1.55e-05	2.1e-05	0	9.03e-05	6.63e-05	8.72e-05	0.00011284	0.000119277	9.35e-05	Eukaryota	Alveolata	Dinoflagellata	Dinophyceae	Dinophyceae_unclassified	Dinophyceae_unclassified	Dinophyceae_unclassified
OTU_819	0.00233722	0.00200099	6.03e-05	0.000260313	0	0	0	0	0.000111858	0.000218436	0.00150397	9.22e-05	0	0	0	0	0	0	6.52e-05	0.000101342	0.000439295	0.000176087	0	0	2.73e-05	0	0	0	0	0	0	0	0	0	0	0	0	Eukaryota	Hacrobia	Katablepharidophyta	Katablepharidaceae	Katablepharidales	Katablepharidales_X	Katablepharidales_XX_sp.
OTU_994	0.00389537	0.00413688	6.03e-05	0.000260313	0	0	0	0	9.79e-05	0.00711131	0.000891241	0.000276651	1.42e-05	0	5.29e-05	2.05e-05	5.24e-05	0	0.00032602	0.00444457	0.000219647	1.96e-05	0	0	0	0	0	0	0	0	0	0	0	0	0	0	0	Eukaryota	Stramenopiles	Ochrophyta	Chrysophyceae	Chrysophyceae_X	Chrysophyceae_Clade-H	Chrysophyceae_Clade-H_X_sp.
OTU_3024	0	0	4.02e-05	0.000260313	0	0	0	0	0	0	0	0	0.000199382	0	0.000105708	0	0	0	0	0	0	0	0	0	0	0	0	0	0	0	0	0	0	0	0	0	0	Eukaryota	Alveolata	Dinoflagellata	Dinophyceae	Peridiniales	Protoperidiniaceae	Protoperidinium_thorianum
OTU_435	0.000868966	0.00022483	2.01e-05	0.000260313	0	0	0	0	0	2.43e-05	0	0	0	0	0	0	0	0	0	0	1.83e-05	0	0	0	0	0	0	0	0	0	0	0	0	0	0	0	0	Eukaryota	Hacrobia	Centroheliozoa	Centroheliozoa_X	Centroheliozoa_XX	Centroheliozoa_XXX	Centroheliozoa_XXXX_sp.
OTU_3217	0	0	0.00102581	0.000242959	0	4.05e-05	0	0	0	0	0	0.000138325	1.42e-05	0.000123438	0	4.1e-05	1.75e-05	0.000177013	0	0	0	0	4.83e-05	1.43e-05	0.00102516	0.00124414	0.00117877	0.00155521	0.00105472	0.00100629	0.00113617	0.000361298	0.000884525	0.000401193	0.000564198	0.000289672	0.000224404	Eukaryota	Eukaryota_unclassified	Eukaryota_unclassified	Eukaryota_unclassified	Eukaryota_unclassified	Eukaryota_unclassified	Eukaryota_unclassified
OTU_4396	0	0	0.000744212	0.000242959	0	4.05e-05	0	0	0	0	0	2.31e-05	0	0	0	2.05e-05	0	0	0	0	0	0	3.22e-05	0	0.000191364	0.000470754	0.000277359	0.000267056	0.000170617	0.000146751	8.31e-05	9.03e-05	0	0.000139545	0.000161199	0.000221514	5.61e-05	Eukaryota	Alveolata	Ciliophora	Spirotrichea	Strombidiida	Strombidiidae_R	Strombidium_R_unclassified
OTU_11577	0	0	0.000543074	0.000242959	5.99e-05	8.1e-05	0	0	0	0	0	4.61e-05	1.42e-05	0	0	6.15e-05	0	1.77e-05	0	0	0	0	0	0	9.57e-05	0.00025219	0.000468043	0.000172801	0.000108574	2.1e-05	0.000249404	0.000144519	8.85e-05	0.000558182	0.000161199	0.000136316	7.48e-05	Eukaryota	Alveolata	Ciliophora	Spirotrichea	Strombidiida	Strombidiidae_R	Strombidium_R_unclassified
OTU_2320	0	0	0.000543074	0.000242959	0.00098912	0.000372563	3.97e-05	0	0	0	0	0	0	0	0	0	0	0	0	0	0	0	0	0	1.37e-05	0	0	0	0	0	0	0	0	0	0	0	0	Eukaryota	Hacrobia	Cryptophyta	Cryptophyceae	Cryptophyceae_X	Cryptomonadales	Teleaulax_amphioxeia
OTU_776	0	0	0.00052296	0.000242959	5.99e-05	0.000121488	0	0	0	0	0	9.22e-05	0	6.17e-05	0	4.1e-05	1.75e-05	0	0	0	0	0	0	0	0.000423735	0.000588443	0.000918751	0.000644077	0.000310212	0.000146751	0.000498808	0.000252908	0.000110566	0.00033142	0.000290159	0.000272633	0.000168303	Eukaryota	Alveolata	Ciliophora	Spirotrichea	Spirotrichea_unclassified	Spirotrichea_unclassified	Spirotrichea_unclassified
OTU_22954	0	0	0.000462618	0.000242959	3e-05	7.29e-05	7.94e-05	2.52e-05	0	0	0	4.61e-05	4.27e-05	6.17e-05	0	0	3.49e-05	1.77e-05	0	0	0	1.96e-05	0	0	8.2e-05	0.000235377	0.000173349	0.000219929	7.76e-05	0.000356394	5.54e-05	0.000704531	0	5.23e-05	0	0.000102237	0	Eukaryota	Alveolata	Dinoflagellata	Dinophyceae	Dinophyceae_unclassified	Dinophyceae_unclassified	Dinophyceae_unclassified
OTU_3286	8.99e-05	4.5e-05	0.000402277	0.000242959	0.00152864	0.00115818	0.00103261	0.00146074	1.4e-05	0	8.36e-05	0.000345813	0.000398764	0.000632618	0.000229035	0.000492045	0.000681056	0.00014161	0	0	0	0	0	0	0	5.04e-05	0.000329364	9.43e-05	0.000170617	4.19e-05	0.000221693	1.81e-05	0.000199018	0.000261648	0.000338519	0.000119277	0.000504909	Eukaryota	Alveolata	Dinoflagellata	Dinophyceae	Dinophyceae_unclassified	Dinophyceae_unclassified	Dinophyceae_unclassified
OTU_872	0	0	0.000382163	0.000242959	5.99e-05	0	0	0	0	0	0	0	0	0	0	0	0	0	0	0	5.49e-05	0	0	0	0.000287046	0.000285815	6.93e-05	0.00018851	0.000170617	8.39e-05	0	0.000162584	0	0	1.61e-05	5.11e-05	0	Eukaryota	Alveolata	Ciliophora	CONThreeP	CONThreeP_X	Urotrichidae	Urotricha_sp.
OTU_18576	0.00020975	0.000269796	0.000362049	0.000242959	0	0	0	0	0	0	0	0	0	0	0	0	0	0	0	0	0	0	0	0	0	0	0	0	0	0	0	0	0	0	0	0	0	Eukaryota	Opisthokonta	Choanoflagellida	Choanoflagellatea	Craspedida	Craspedida_unclassified	Craspedida_unclassified
OTU_1130	0	0	0.000362049	0.000242959	0	2.43e-05	0	2.52e-05	0	0	0	0	0	3.09e-05	0	0	0	5.31e-05	0	0	0	0	0	0	5.47e-05	0.000538005	0.000814742	0.000235638	0.000108574	2.1e-05	0.000554232	3.61e-05	0.000331697	0.000139545	0.000628677	0.000204475	0.000261805	Eukaryota	Alveolata	Dinoflagellata	Dinophyceae	Gymnodiniales	Kareniaceae	Kareniaceae_unclassified
OTU_22534	0	0	0.000301708	0.000242959	0.000869226	0.000858515	0.000198578	0.000226666	0	0	0	6.92e-05	7.12e-05	0.000262305	0	0.000164015	1.75e-05	7.08e-05	0	0	0	1.96e-05	0	0	2.73e-05	3.36e-05	0.000138679	0.000172801	1.55e-05	0.000104822	2.77e-05	0.000289038	2.21e-05	0.000226761	3.22e-05	0.00037487	9.35e-05	Eukaryota	Alveolata	Dinoflagellata	Dinophyceae	Dinophyceae_unclassified	Dinophyceae_unclassified	Dinophyceae_unclassified
OTU_6194	0	0	0.000281594	0.000242959	0.00026976	8.91e-05	0	0	0	0	0	0	0	1.54e-05	0	0	0	0	0	0	3.66e-05	0	0	0	1.37e-05	0	0	0	0	0	0	0	0	0	1.61e-05	0	0	Eukaryota	Hacrobia	Cryptophyta	Cryptophyceae	Cryptophyceae_X	Cryptomonadales	Cryptomonadales_unclassified
OTU_8161	0	0	0.000241366	0.000242959	0.000869226	0.000518349	0.000198578	0.000327406	0	0	2.79e-05	0.000184434	1.42e-05	4.63e-05	3.52e-05	0.000225521	5.24e-05	7.08e-05	0	0	0	0	0	0	2.73e-05	6.73e-05	5.2e-05	7.85e-05	0.000124085	0.000125786	0.000138558	0.000307103	0.000199018	0.000191875	0.000257919	0.000357831	0.000187003	Eukaryota	Alveolata	Dinoflagellata	Dinophyceae	Dinophyceae_unclassified	Dinophyceae_unclassified	Dinophyceae_unclassified
OTU_21450	0	0	0.000241366	0.000242959	0.000569493	0.000534547	0.0011319	0.000881479	0	0	8.36e-05	0.000207488	0.00115357	0.000663478	0.00081043	0.00043054	0.000192093	0.00026552	0	0	1.83e-05	9.78e-05	0	1.43e-05	4.1e-05	6.73e-05	0.000416038	7.85e-05	0.000108574	2.1e-05	0.000332539	0.000307103	0.000442263	0.000261648	0.000677037	0.000596384	0.00207574	Eukaryota	Alveolata	Dinoflagellata	Dinophyceae	Peridiniales	Thoracosphaeraceae	Thoracosphaeraceae_unclassified
OTU_2345	0	0	0.000181025	0.000242959	3e-05	8.91e-05	0	2.52e-05	0	0	0	0	5.7e-05	1.54e-05	0	2.05e-05	1.75e-05	1.77e-05	0	0	0	0	0	0	0	0	1.73e-05	4.71e-05	0	2.1e-05	5.54e-05	0	4.42e-05	3.49e-05	4.84e-05	1.7e-05	0	Eukaryota	Alveolata	Dinoflagellata	Dinophyceae	Gymnodiniales	Gymnodiniaceae	Gymnodiniaceae_unclassified
OTU_8166	0	0	0.000181025	0.000242959	5.99e-05	1.62e-05	0	0	0	0	0	0	1.42e-05	0	0	0	0	0	0	0	0	0	0	0	0	0	0	0	0	0	0	0	0	0	0	1.7e-05	1.87e-05	Eukaryota	Eukaryota_unclassified	Eukaryota_unclassified	Eukaryota_unclassified	Eukaryota_unclassified	Eukaryota_unclassified	Eukaryota_unclassified
OTU_2953	0	0	0.000160911	0.000242959	0.00287744	0.00318299	0.000357441	0.000352592	0	0	0	0.000253596	2.85e-05	0.000200586	0	0.00151714	1.75e-05	0.000283221	0	0	0	0	0	0	8.2e-05	0.000269003	0.000208019	0.000204219	0.000279191	8.39e-05	0.000138558	0.000632271	0.000154792	0.00155244	0.000145079	0.000800859	0.000261805	Eukaryota	Alveolata	Dinoflagellata	Dinophyceae	Dinophyceae_unclassified	Dinophyceae_unclassified	Dinophyceae_unclassified
OTU_94	0	0	0.000160911	0.000242959	0.000659413	0.000453555	0.00234322	0.00178814	0	0	2.79e-05	0.000414976	0.00027059	0.000200586	0.000281889	0.000553551	0.000139704	0.000177013	0	0	0	3.91e-05	0.000128673	0	1.37e-05	0.000168127	0.000138679	7.85e-05	0.000589403	8.39e-05	0.000609655	0.000162584	0.000287471	0.000296534	0.000209559	0.000425989	0.000486209	Eukaryota	Alveolata	Dinoflagellata	Dinophyceae	Gymnodiniales	Gymnodiniaceae	Gymnodiniaceae_unclassified
OTU_19663	0	0	0.000160911	0.000242959	5.99e-05	0.00010529	0.000139005	0.000428147	0	0	0	6.92e-05	7.12e-05	7.71e-05	0	4.1e-05	0	0	0	0	0	0	0	0	0	0.000100876	8.67e-05	7.85e-05	7.76e-05	2.1e-05	2.77e-05	3.61e-05	0	8.72e-05	6.45e-05	0	3.74e-05	Eukaryota	Alveolata	Dinoflagellata	Dinophyceae	Dinophyceae_unclassified	Dinophyceae_unclassified	Dinophyceae_unclassified
OTU_6397	0	0	0.000140797	0.000242959	0.000329707	0.000113389	0.000297867	0.000402962	0	0	0.000779836	0.00329675	0.00677899	0.00418145	0.000317125	0.00153764	0.00158913	0.0102845	0	0	0	0.000313044	0.00199444	0.000930699	0.00158559	0.00245465	0.00339765	0.00438286	0.0023421	0.00593291	0.0042953	0.0050401	0.00650126	0.00176176	0.00354638	0.00190843	0.00233754	Eukaryota	Hacrobia	Cryptophyta	Cryptophyceae	Cryptophyceae_X	Cryptomonadales	Teleaulax_gracilis
OTU_746	0	0	0.000140797	0.000242959	0.000329707	0.000210579	0	0	0	0	0	2.31e-05	5.7e-05	0.000169727	1.76e-05	0	0	0	0	0	0	0	0	1.43e-05	0	3.36e-05	0	0	1.55e-05	0	0	1.81e-05	0	1.74e-05	0	0	0	Eukaryota	Stramenopiles	Ochrophyta	Chrysophyceae	Chrysophyceae_X	Chrysophyceae_Clade-C	Chrysophyceae_Clade-C_X_sp.
OTU_7281	0.000449465	0.000134898	0.000140797	0.000242959	0	0	0	0	0	0	0	2.31e-05	0	0	0	0	0	0	0	0	0	0	0	0	0	0	0	0	0	0	0	0	0	0	0	0	0	Eukaryota	Stramenopiles	Ochrophyta	Chrysophyceae	Chrysophyceae_X	Chrysophyceae_Clade-D	Chrysophyceae_Clade-D_X_sp.
OTU_15734	0	0	0.000100569	0.000242959	0.000119893	0.000461654	3.97e-05	0	0	0	0	9.22e-05	8.54e-05	0.000108008	0	0.00043054	8.73e-05	0	3.26e-05	0	0	0	0	0	0	0	8.67e-05	0	4.65e-05	0	2.77e-05	0	0	0.000104659	1.61e-05	5.11e-05	1.87e-05	Eukaryota	Alveolata	Dinoflagellata	Dinophyceae	Dinophyceae_unclassified	Dinophyceae_unclassified	Dinophyceae_unclassified
OTU_5623	0	0	8.05e-05	0.000242959	3e-05	8.1e-05	0	0	0	0	0	0	1.42e-05	3.09e-05	0	0	0	0	0	0	0	0	0	0	0	1.68e-05	1.73e-05	0	0	4.19e-05	0	9.03e-05	0	3.49e-05	3.22e-05	1.7e-05	0	Eukaryota	Alveolata	Ciliophora	Spirotrichea	Spirotrichea_unclassified	Spirotrichea_unclassified	Spirotrichea_unclassified
OTU_9331	0	0	8.05e-05	0.000242959	0.000119893	8.1e-06	5.96e-05	0.000151111	1.4e-05	4.85e-05	0.000473472	0.00193655	0.00232138	0.0017127	0.000123326	0.00075857	0.000663593	0.00339865	0	0	0	9.78e-05	0.0010133	0.000415235	0.00146257	0.00149633	0.00159481	0.00208932	0.00179923	0.00268344	0.00138558	0.00227618	0.00192384	0.000750057	0.00175707	0.000903096	0.000935016	Eukaryota	Hacrobia	Cryptophyta	Cryptophyceae	Cryptophyceae_X	Cryptomonadales	Teleaulax_gracilis
OTU_254	0.000419501	0.000337245	4.02e-05	0.000242959	0	0	0	0	0	0	8.36e-05	0	0	0	0	0	0	0	0.000521631	0	0.0298171	0.0187435	0.00168884	0.000343643	0.000533085	1.68e-05	6.93e-05	0.000109964	0.000310212	8.39e-05	0	0	0	0	0	0	0	Eukaryota	Alveolata	Ciliophora	Litostomatea	Litostomatea_unclassified	Litostomatea_unclassified	Litostomatea_unclassified
OTU_8137	0	0	0.000683871	0.000225604	0.000149867	0.000364464	0	0	0	0	0	0	1.42e-05	0	0	0	0	0	0	0	0	0	0	0	0	0	0	0	0	0	0	0	0	1.74e-05	3.22e-05	1.7e-05	1.87e-05	Eukaryota	Stramenopiles	Ochrophyta	Bacillariophyta	Bacillariophyta_X	Polar-centric-Mediophyceae	Chaetoceros_unclassified
OTU_2746	0	0	0.000502846	0.000225604	0.000119893	4.05e-05	0	0	0	0	0	2.31e-05	2.85e-05	1.54e-05	0	0	0	8.85e-05	0	0	0	0	0	0	0.000287046	0.000420316	0.000554718	0.000675495	0.000449808	0.000146751	0.000221693	5.42e-05	0.000154792	0.000174432	0.00011284	0.000255593	0.000130902	Eukaryota	Alveolata	Ciliophora	Spirotrichea	Strombidiida	Strombidiidae_R	Strombidium_biarmatum
OTU_726	0	0	0.000301708	0.000225604	5.99e-05	0	0	0	0	0	2.79e-05	2.31e-05	0	1.54e-05	0	0	0	0	0	0	0	0	0	0	1.37e-05	8.41e-05	0.000242689	0.000377021	9.31e-05	2.1e-05	0	1.81e-05	2.21e-05	0.000209318	9.67e-05	5.11e-05	3.74e-05	Eukaryota	Alveolata	Ciliophora	Litostomatea	Haptoria_4	Didiniidae	Didiniidae_X_sp.
OTU_6623	0	0	0.000301708	0.000225604	0.00017984	0.000315869	0	2.52e-05	0	0	0	4.61e-05	0	1.54e-05	0	2.05e-05	0	0	3.26e-05	0	0	0	0	0	2.73e-05	0	5.2e-05	0	1.55e-05	0	2.77e-05	0	0	8.72e-05	0	3.41e-05	3.74e-05	Eukaryota	Alveolata	Dinoflagellata	Dinophyceae	Dinophyceae_unclassified	Dinophyceae_unclassified	Dinophyceae_unclassified
OTU_2209	0	0	0.00026148	0.000225604	0	0	0	0	0	0	0	0.000115271	1.42e-05	3.09e-05	1.76e-05	0	1.75e-05	1.77e-05	0	0	0	0	3.22e-05	0	5.47e-05	5.04e-05	0.000121344	0.000109964	7.76e-05	0.000146751	8.31e-05	3.61e-05	6.63e-05	0.000156989	9.67e-05	3.41e-05	0	Eukaryota	Alveolata	Ciliophora	Spirotrichea	Strombidiida	Strombidiidae_R	Strombidium_R_unclassified
OTU_4019	0	0	0.000241366	0.000225604	5.99e-05	5.67e-05	0	0	0	0	0.000111405	0.00016138	0.000826011	0.000725197	0.000123326	8.2e-05	3.49e-05	0.000106208	0	0	0	0	0	0	0	0	0	0	0	8.39e-05	0	0.000325168	0	0.000453523	0	0.000136316	0	Eukaryota	Alveolata	Ciliophora	Spirotrichea	Strombidiida	Tontoniidae_A	Laboea_strobila
OTU_23112	0	0	0.000221252	0.000225604	0.000419627	0.00145786	0.000218436	0.000176296	0	0	2.79e-05	0.00087606	0.000170899	0.000370313	1.76e-05	0.00250123	0	0.000531039	0	0	0	0	0	0	2.73e-05	0.000638881	0.000260024	0.000125674	0.0013184	4.19e-05	0.000997617	0.000180649	0.000154792	0.000645398	0.000193439	0.000494147	0.00117812	Eukaryota	Alveolata	Dinoflagellata	Dinophyceae	Gymnodiniales	Gymnodiniaceae	Gyrodinium_fusiforme
OTU_754	0.0013484	0.00276541	0.000201138	0.000225604	0	0	0	0	0	0	2.79e-05	0	0	0	0	0	0	0	0	0	0	0	0	0	0	0	0	0	0	0	0	0	0	0	0	0	0	Eukaryota	Eukaryota_unclassified	Eukaryota_unclassified	Eukaryota_unclassified	Eukaryota_unclassified	Eukaryota_unclassified	Eukaryota_unclassified
OTU_706	0.00119857	0.000337245	0.000201138	0.000225604	0	0	5.96e-05	7.56e-05	8.39e-05	0.00036406	0.00192174	0.000484139	0.00269166	0.000725197	0.00116279	0.000205019	0.000943001	0.00106208	0.0017279	0.00541456	0.000420991	0.000313044	1.61e-05	0	6.83e-05	1.68e-05	6.93e-05	0.000172801	7.76e-05	0.00033543	5.54e-05	5.42e-05	2.21e-05	3.49e-05	3.22e-05	5.11e-05	0.000112202	Eukaryota	Stramenopiles	Ochrophyta	Chrysophyceae	Chrysophyceae_X	Chrysophyceae_Clade-F	Chrysophyceae_Clade-F_unclassified
OTU_13515	0	0	0.000181025	0.000225604	0	1.62e-05	0	0	0	0	0	0	0	0	0	0	0	0	0	0	0	0	0	0	0	0	0	1.57e-05	1.55e-05	0	0	0	0	0	0	0	0	Eukaryota	Alveolata	Ciliophora	Spirotrichea	Strombidiida	Strombidiidae_R	Strombidium_R_unclassified
OTU_3538	0	0	0.000181025	0.000225604	0.000929173	0.00133637	0.000893602	0.000957034	0	0	0	2.31e-05	2.85e-05	3.09e-05	8.81e-05	0.000102509	6.99e-05	0	0	0	0	0	0	0	0	8.41e-05	3.47e-05	1.57e-05	0.000139595	2.1e-05	0.000138558	3.61e-05	0.000265358	3.49e-05	0.000435238	0.000187435	0.00121552	Eukaryota	Alveolata	Dinoflagellata	Dinophyceae	Dinophyceae_unclassified	Dinophyceae_unclassified	Dinophyceae_unclassified
OTU_2423	0	0	0.000140797	0.000225604	3e-05	0.000145786	0	0	0	0	0	2.31e-05	0.000256348	0.000293165	5.29e-05	0.00043054	3.49e-05	0	0	0	0	0	0	0	0	0	1.73e-05	0	0	0	0	5.42e-05	0	0	0	0	0	Eukaryota	Alveolata	Dinoflagellata	Dinophyceae	Peridiniales	Protoperidiniaceae	Protoperidinium_sp.
OTU_2158	0	0	0.000120683	0.000225604	0.00071936	0.000210579	9.93e-05	0.000201481	0	0	0	9.22e-05	8.54e-05	0.000169727	7.05e-05	0.000389536	0.000593741	0.000212416	0	0	0	0	0	0	5.47e-05	5.04e-05	0.000156014	0.000204219	6.2e-05	0.00033543	8.31e-05	0.00074066	0.000199018	0.000523295	0.000177319	0.000528226	9.35e-05	Eukaryota	Alveolata	Dinoflagellata	Dinophyceae	Gymnodiniales	Gymnodiniaceae	Gyrodinium_helveticum
OTU_5346	0	0	0.000100569	0.000225604	0.000599466	0.000728928	0.00325668	0.00153629	0	0	5.57e-05	0.00016138	0.000156657	9.26e-05	8.81e-05	0.000635558	0.000558815	7.08e-05	0	0	0	0	0	0	4.1e-05	6.73e-05	0.000121344	6.28e-05	7.76e-05	2.1e-05	5.54e-05	0.000108389	6.63e-05	0.00033142	0.00011284	0.000153356	0.000168303	Eukaryota	Alveolata	Dinoflagellata	Dinophyceae	Dinophyceae_unclassified	Dinophyceae_unclassified	Dinophyceae_unclassified
OTU_583	0	0	0.000100569	0.000225604	0.000209813	0.000396861	0.000357441	0.000428147	0	0	0	0.0011066	0.000128174	0.000277735	0	0.000102509	0	7.08e-05	0	0	0	0	0.00019301	0	4.1e-05	0.000554818	0.000312029	3.14e-05	0.000387765	0.000146751	0.000221693	0.000216779	6.63e-05	0.000662841	0.000257919	0.000443028	0.000430108	Eukaryota	Alveolata	Dinoflagellata	Dinophyceae	Dinophyceae_unclassified	Dinophyceae_unclassified	Dinophyceae_unclassified
OTU_2583	0	0	0.000100569	0.000225604	0.000119893	2.43e-05	0	0	0	0	0	0	0.000142416	7.71e-05	0	2.05e-05	0	0	0	0	0	0	0	0	0	0	0	0	0	0	0	0	0	0	0	0	0	Eukaryota	Alveolata	Dinoflagellata	Syndiniales	Dino-Group-II	Dino-Group-II-Clade-3	Dino-Group-II-Clade-3_X_sp.
OTU_2661	0.00389537	0.00564324	8.05e-05	0.000225604	0	0	0	0	0.000223717	0.000145624	5.57e-05	0	0	0	0	0	0	0	0.0099436	0.00560277	0.00126297	0.000978263	1.61e-05	0.000100229	0	0	1.73e-05	0	0	0	0	0	0	0	0	0	0	Eukaryota	Alveolata	Ciliophora	Spirotrichea	Choreotrichida	Strobilidiidae_B	Strobilidiidae_B_X_sp.
OTU_13017	0	0	4.02e-05	0.000225604	0.00017984	0.000121488	0	0	0	0	0	0	0	1.54e-05	0	0	0	0	0	0	0	0	0	0	0	0	0	0	0	2.1e-05	0.000110846	0.000830985	0	0.00125591	0	0.000102237	1.87e-05	Eukaryota	Alveolata	Ciliophora	Spirotrichea	Strombidiida	Strombidiida_unclassified	Strombidiida_unclassified
OTU_634	0	0	2.01e-05	0.000225604	0	0	0	0	0	0	0	0	0	0	0	0	0	0	0	0	0	0	0.000611198	1.43e-05	0.000287046	0.000605256	8.67e-05	0.000424148	6.2e-05	4.19e-05	2.77e-05	1.81e-05	2.21e-05	0	0.000128959	0	1.87e-05	Eukaryota	Alveolata	Ciliophora	CONThreeP	CONThreeP_X	CONThreeP_XX	Askenasia_sp.
OTU_3922	0	0	0.00078444	0.00020825	5.99e-05	8.1e-06	0	0	0	0	0	2.31e-05	1.42e-05	1.54e-05	0	0	0	3.54e-05	0	0	0	0	1.61e-05	0	0.000177695	0.000285815	0.000294694	0.000408439	0.000294702	0.000125786	0.000221693	0.000108389	8.85e-05	8.72e-05	0.00011284	5.11e-05	5.61e-05	Eukaryota	Alveolata	Alveolata_unclassified	Alveolata_unclassified	Alveolata_unclassified	Alveolata_unclassified	Alveolata_unclassified
OTU_3474	0	0	0.00052296	0.00020825	0.00137877	0.000599341	3.97e-05	2.52e-05	0	0	0	0.000322759	1.42e-05	1.54e-05	1.76e-05	0.000225521	5.24e-05	0.00014161	0	0	0	0	0	0	2.73e-05	8.41e-05	0.000606722	0.000628368	0.000186127	0.000356394	0.00177354	0.000126454	0.000132679	0.000139545	0	1.7e-05	3.74e-05	Eukaryota	Alveolata	Dinoflagellata	Dinophyceae	Gymnodiniales	Gymnodiniaceae	Gyrodinium_helveticum
OTU_664	0	0	0.000502846	0.00020825	0.000389653	0.00090711	3.97e-05	0.000125926	0	0	0	6.92e-05	0.000598146	0.000246875	0.0014623	0.00118911	0.000558815	0	0	0	0	0	0	0	2.73e-05	6.73e-05	0	3.14e-05	3.1e-05	4.19e-05	5.54e-05	0	2.21e-05	1.74e-05	0	3.41e-05	1.87e-05	Eukaryota	Hacrobia	Centroheliozoa	Centroheliozoa_X	Pterocystida	Pterocystida_X	Pterocystida_XX_sp.
OTU_11351	0	0	0.000462618	0.00020825	3e-05	8.1e-06	0	0	0	0	0	0.000968277	0.00018514	0.000246875	0	4.1e-05	1.75e-05	0.000212416	0	0	0	0	0.00170492	4.3e-05	0.00649271	0.00445535	0.00286026	0.000408439	0.00167515	0.000775681	0.00235548	0.000270973	0.000796073	0.000139545	0.00112839	0.000425989	0.000504909	Eukaryota	Alveolata	Ciliophora	Spirotrichea	Strombidiida	Strombidiidae_R	Strombidiidae_R_X_sp.
OTU_74	0.00152818	0.00110167	0.000402277	0.00020825	0	0	0	0	0.00366336	0.0103393	0.0010862	9.22e-05	1.42e-05	0	0	0	0	0	3.26e-05	0.00406816	0	3.91e-05	0	0	0	0	0	0	0	0	0	0	0	0	0	0	0	Eukaryota	Stramenopiles	Ochrophyta	Chrysophyceae	Chrysophyceae_X	Chrysophyceae_Clade-C	Chrysophyceae_Clade-C_unclassified
OTU_10118	0	0	0.000362049	0.00020825	8.99e-05	1.62e-05	1.99e-05	0	0	0	0	4.61e-05	0	0	0	4.1e-05	0	5.31e-05	0	0	0	0	0	0	6.83e-05	0.000184939	0.000485378	9.43e-05	6.2e-05	6.29e-05	0.000332539	1.81e-05	6.63e-05	5.23e-05	0.000177319	0.000153356	0.000187003	Eukaryota	Alveolata	Alveolata_unclassified	Alveolata_unclassified	Alveolata_unclassified	Alveolata_unclassified	Alveolata_unclassified
OTU_343	0	0	0.000341935	0.00020825	5.99e-05	4.86e-05	0	0	0	0	0	4.61e-05	4.27e-05	1.54e-05	1.76e-05	4.1e-05	8.73e-05	0.000336325	0	0	0	0	1.61e-05	0	0.000177695	0.000420316	0.000901416	0.000471276	0.000496339	0.000964361	0.00110846	0.000234844	0.000176905	0.000924488	0.000322399	0.000545266	9.35e-05	Eukaryota	Alveolata	Ciliophora	Spirotrichea	Strombidiida	Strombidiidae_R	Strombidium_R_unclassified
OTU_2669	0	0	0.000301708	0.00020825	5.99e-05	2.43e-05	0	0	0	0	0	4.61e-05	0	0	0	2.05e-05	1.75e-05	1.77e-05	0	0	0	0	0	0	0.000232371	0.000403504	0.000398703	0.000534113	0.00024817	0.000125786	0.000110846	5.42e-05	0	0.000244205	1.61e-05	0.000306712	0	Eukaryota	Alveolata	Dinoflagellata	Dinophyceae	Gymnodiniales	Gymnodiniaceae	Gyrodinium_unclassified
OTU_4408	0	0	0.000281594	0.00020825	3e-05	2.43e-05	0	0	0	0	0	0	0	0	0	0	0	0	0	0	0	0	0	0	0	0	1.73e-05	0	0	0	0	0	0	0	0	0	0	Eukaryota	Hacrobia	Cryptophyta	Cryptophyceae	Cryptophyceae_X	Cryptomonadales	Cryptomonadales_unclassified
OTU_4960	0	0	0.000281594	0.00020825	0.00158859	0.000923309	3.97e-05	0.000151111	0	0	0	2.31e-05	2.85e-05	6.17e-05	1.76e-05	2.05e-05	1.75e-05	0	0	0	0	0	0	0	1.37e-05	0	0	3.14e-05	0	2.1e-05	2.77e-05	5.42e-05	0	5.23e-05	3.22e-05	3.41e-05	1.87e-05	Eukaryota	Alveolata	Dinoflagellata	Dinophyceae	Gymnodiniales	Gymnodiniaceae	Gyrodinium_helveticum
OTU_1100	0.00137836	0.00112415	0.000281594	0.00020825	0	0	0	0	0	0	2.79e-05	2.31e-05	1.42e-05	0	0	0	0	0	0	0.000115819	0	0	0	0	0	0	0	0	0	0	0	0	0	0	0	0	0	Eukaryota	Stramenopiles	Ochrophyta	Chrysophyceae	Chrysophyceae_X	Chrysophyceae_Clade-C	Dinobryon_unclassified
OTU_1003	0	0	0.00026148	0.00020825	0.00677397	0.00368514	0.000297867	0.000428147	0	0	0.000389918	0.000345813	0.00108236	0.00145039	0.00132135	0.000246023	0.00160659	0.000725754	0	0	0	0	8.04e-05	0.000114548	0.000451072	0.000386691	0.000953421	0.000518403	0.000806552	0.00402516	0.00130244	0.00168004	0.0032064	0.00130824	0.00174095	0.00192547	0.00108462	Eukaryota	Archaeplastida	Chlorophyta	Mamiellophyceae	Mamiellales	Bathycoccaceae	Bathycoccus_prasinos
OTU_4033	0	0	0.00026148	0.00020825	8.99e-05	1.62e-05	0	0	0	0	0	0.000115271	1.42e-05	0.000324024	0	2.05e-05	0	0	0	0	0	1.96e-05	0	0	0	5.04e-05	1.73e-05	0	0	0	0	0.000252908	0	0.00038375	0	3.41e-05	0	Eukaryota	Alveolata	Ciliophora	Spirotrichea	Strombidiida	Tontoniidae_A	Tontoniidae_A_X_sp.
OTU_4948	0	0	0.000241366	0.00020825	3e-05	5.67e-05	7.94e-05	0.000151111	0	0	0	0.000138325	1.42e-05	4.63e-05	0	0	0	0	0	0	0	0	0	0	0	0	0	0	0	0	0	1.81e-05	0	0.000191875	0	3.41e-05	0	Eukaryota	Alveolata	Ciliophora	CONThreeP	CONThreeP_X	CONThreeP_XX	Askenasia_sp.
OTU_8904	0	0	0.000241366	0.00020825	0	0	0	2.52e-05	0	0	0	0	0	0	0	0	0	3.54e-05	0	0	0	0	0	0	0	0	0	1.57e-05	4.65e-05	4.19e-05	0.000110846	0	0	0	0	0	0	Eukaryota	Alveolata	Ciliophora	Spirotrichea	Choreotrichida	Strobilidiidae_A	Rimostrombidium_A_sp.
OTU_4612	0	0	0.000241366	0.00020825	0.000149867	0.000186282	0	2.52e-05	0	0	0	0.000115271	0.000213623	0.000277735	7.05e-05	0	0	0.000106208	0	0	0	0	0	0	0.000369059	0.000184939	0.000138679	0.000314184	0.000325723	2.1e-05	0.000110846	0.000108389	0	0.000156989	4.84e-05	1.7e-05	1.87e-05	Eukaryota	Alveolata	Dinoflagellata	Dinophyceae	Gymnodiniales	Gymnodiniaceae	Gyrodinium_unclassified
OTU_3832	0	0	0.000221252	0.00020825	0.000119893	0.000251075	9.93e-05	0.000125926	0	0	0	0	0	0	0	2.05e-05	0	1.77e-05	0	0	0	0	0	0	0	6.73e-05	8.67e-05	1.57e-05	0	2.1e-05	2.77e-05	0.000343233	0	0.000191875	1.61e-05	3.41e-05	0	Eukaryota	Alveolata	Dinoflagellata	Dinophyceae	Gymnodiniales	Gymnodiniaceae	Gyrodinium_helveticum
OTU_6000	0	0	0.000221252	0.00020825	3e-05	3.24e-05	0.000158863	0.000125926	0	0	0	9.22e-05	0	3.09e-05	0	0	0	1.77e-05	0	0	0	0	0	1.43e-05	1.37e-05	1.68e-05	0	3.14e-05	1.55e-05	4.19e-05	0	0	6.63e-05	1.74e-05	0	3.41e-05	0	Eukaryota	Alveolata	Dinoflagellata	Dinophyceae	Gymnodiniales	Gymnodiniaceae	Gymnodiniaceae_unclassified
OTU_7039	0.000569323	0.000449661	0.000221252	0.00020825	0	0	0	0	0	0.000339789	2.79e-05	6.92e-05	0	0	1.76e-05	0	0	0	0	0	0.000146432	5.87e-05	0	0	0	0	0	0	0	0	0	0	0	0	0	0	0	Eukaryota	Hacrobia	Katablepharidophyta	Katablepharidaceae	Katablepharidales	Katablepharidales_X	Katablepharidales_XX_sp.
OTU_3839	0	0	0.000201138	0.00020825	0.00017984	0.000356365	7.94e-05	2.52e-05	0	0	0	0.000184434	2.85e-05	6.17e-05	0	8.2e-05	0	3.54e-05	0	0	0	0	1.61e-05	7.16e-05	0.000150357	0.000134501	3.47e-05	0	4.65e-05	2.1e-05	0.000138558	0.000108389	0	0.000226761	8.06e-05	3.41e-05	0.000130902	Eukaryota	Alveolata	Dinoflagellata	Dinophyceae	Dinophyceae_unclassified	Dinophyceae_unclassified	Dinophyceae_unclassified
OTU_2436	3e-05	0	0.000181025	0.00020825	0.000569493	0.000963805	0.00361412	0.00176296	0	0	0.000111405	0.000184434	0.000170899	0.000108008	8.81e-05	0.000697064	0.00064613	5.31e-05	0	0	0	0	4.83e-05	2.86e-05	1.37e-05	0	6.93e-05	6.28e-05	3.1e-05	4.19e-05	8.31e-05	7.23e-05	0.000110566	0.000436079	0.000225679	0.000443028	0.000130902	Eukaryota	Alveolata	Dinoflagellata	Dinophyceae	Dinophyceae_unclassified	Dinophyceae_unclassified	Dinophyceae_unclassified
OTU_6755	0	0	0.000181025	0.00020825	0	1.62e-05	0	0	0	0	0	0.000184434	0	0	0	4.1e-05	0	7.08e-05	0	0	0	1.96e-05	0	0	0.00047841	0.000218565	0.000277359	0.000424148	0.000217149	0.000104822	8.31e-05	3.61e-05	0	0.000139545	9.67e-05	0.000187435	3.74e-05	Eukaryota	Alveolata	Dinoflagellata	Dinophyceae	Gymnodiniales	Gymnodiniales_unclassified	Gymnodiniales_unclassified
OTU_51	0	2.25e-05	0.000181025	0.00020825	0.000779306	0.000348266	1.99e-05	5.04e-05	0	0	0.000612728	0.000853006	0.00786134	0.00665021	0.0095666	0.000717566	0.0077361	0.00198255	0	0	0	0	0	0	0.000218702	0.000975134	0.0025829	0.00190081	0.00142698	0.0039413	0.00271573	0.00438977	0.00267569	0.00296534	0.00186991	0.00335679	0.00136512	Eukaryota	Stramenopiles	Stramenopiles_X	MAST	MAST-2	MAST-2D	MAST-2D_X_sp.
OTU_3155	0	0	0.000160911	0.00020825	0.00125888	0.00126348	0.000238294	0.000151111	0	0	0	0.000115271	2.85e-05	0.000154297	0	0.0010661	1.75e-05	0.000300922	0	0	0	0	0	0	5.47e-05	0.000353066	0.000173349	0.000109964	0.000232659	0.000167715	0.000304827	0.000505817	0.000110566	0.000941932	0.000274039	0.000834938	0.000224404	Eukaryota	Alveolata	Dinoflagellata	Dinophyceae	Dinophyceae_unclassified	Dinophyceae_unclassified	Dinophyceae_unclassified
OTU_6013	0	0	0.000160911	0.00020825	0.000599466	0.000939507	0.000853886	0.000957034	0	0	0	4.61e-05	0.000370281	0.0005709	7.05e-05	0.000512547	0.000611204	0	0	0	0	0	0	0	0	0.000100876	0.00010401	0.000172801	0.000124085	0.000104822	0.000387962	0.000108389	6.63e-05	0.000191875	8.06e-05	0.000221514	5.61e-05	Eukaryota	Alveolata	Dinoflagellata	Dinophyceae	Torodiniales	Torodiniaceae	Torodinium_robustum
OTU_619	0.00173793	0.000854355	0.000160911	0.00020825	0	0	0	0	0.000531327	0.00177176	0.000167108	0	0	0	0	0	1.75e-05	0	3.26e-05	0.000144774	0	5.87e-05	0	0	0	0	0	0	0	0	0	0	0	0	0	0	0	Eukaryota	Stramenopiles	Ochrophyta	Synurophyceae	Synurales	Synurales_X	Mallomonas_sp.
OTU_22583	0	0	0.000140797	0.00020825	0	8.1e-06	0	0	0	0	0	2.31e-05	2.85e-05	4.63e-05	0	0	1.75e-05	0	0	0	0	0	0	0	0	0	0	0	0	0	0	0	0	3.49e-05	0	0	0	Eukaryota	Alveolata	Dinoflagellata	Dinophyceae	Dinophyceae_unclassified	Dinophyceae_unclassified	Dinophyceae_unclassified
OTU_1750	0.00242711	0.00303521	0.000120683	0.00020825	0	0	0	0	0	0	0	0	0	0	0	0	0	0	0	0	1.83e-05	0	0	0	0	0	0	0	0	0	0	0	0	0	0	0	0	Eukaryota	Opisthokonta	Choanoflagellida	Choanoflagellatea	Craspedida	Monosigidae_Group_A	Monosiga_ovata
OTU_3745	0	0	0.000120683	0.00020825	0.000329707	8.1e-05	0.000337583	0.000428147	0	0	0	4.61e-05	7.12e-05	1.54e-05	0	4.1e-05	1.75e-05	1.77e-05	0	0	0	0	0	0	2.73e-05	0	3.47e-05	4.71e-05	0	4.19e-05	2.77e-05	0	2.21e-05	8.72e-05	1.61e-05	1.7e-05	3.74e-05	Eukaryota	Alveolata	Dinoflagellata	Dinophyceae	Gymnodiniales	Gymnodiniaceae	Gyrodinium_helveticum
OTU_6538	0	0	0.000100569	0.00020825	0.00026976	0.000121488	0.000297867	7.56e-05	0	0	0	2.31e-05	7.12e-05	4.63e-05	0	2.05e-05	6.99e-05	1.77e-05	0	0	0	0	0	0	5.47e-05	5.04e-05	6.93e-05	4.71e-05	3.1e-05	8.39e-05	0	9.03e-05	0	0.000122102	0	3.41e-05	0	Eukaryota	Alveolata	Dinoflagellata	Dinophyceae	Gymnodiniales	Gymnodiniaceae	Gyrodinium_helveticum
OTU_241	0	0	8.05e-05	0.00020825	0.00476576	0.00280232	9.93e-05	2.52e-05	0	0	0	0	4.27e-05	0.000108008	5.29e-05	8.2e-05	0	1.77e-05	0	0	0	0	0	0	1.37e-05	0	3.47e-05	0	4.65e-05	6.29e-05	0	0.000108389	4.42e-05	0.000122102	6.45e-05	6.82e-05	0	Eukaryota	Archaeplastida	Chlorophyta	Mamiellophyceae	Mamiellales	Mamiellaceae	Micromonas_unclassified
OTU_3617	0	0	8.05e-05	0.00020825	0.000239787	0.000121488	0	0	0	0	0	0	5.7e-05	0.000169727	0	6.15e-05	1.75e-05	0	0	0	0	0	0	0	0	0	1.73e-05	0	0	2.1e-05	0	1.81e-05	0	1.74e-05	0	3.41e-05	0	Eukaryota	Alveolata	Ciliophora	Spirotrichea	Strombidiida_G	Strombidiida_G_X	Strombidiida_G_X_unclassified
OTU_1505	0	0	6.03e-05	0.00020825	0.00026976	4.86e-05	0.000158863	0.000151111	2.8e-05	0	0.000974795	0.00244375	0.00600994	0.00388829	0.000299507	0.00161965	0.0017463	0.00856743	0	0	0	0.000117392	0.00135107	0.000529782	0.00151724	0.00191664	0.00242689	0.00262343	0.00224904	0.00540881	0.0033531	0.00377556	0.00433417	0.0014129	0.00290159	0.00144836	0.00211314	Eukaryota	Hacrobia	Cryptophyta	Cryptophyceae	Cryptophyceae_X	Cryptomonadales	Teleaulax_gracilis
OTU_4138	0	0	6.03e-05	0.00020825	0	0	0	0	0	0	0	6.92e-05	1.42e-05	3.09e-05	3.52e-05	0	1.75e-05	8.85e-05	0	0	0	0	0	0	0	0.000184939	0.000277359	0.000282765	0.00024817	4.19e-05	0.000221693	0.000126454	6.63e-05	3.49e-05	0.000145079	0.000187435	5.61e-05	Eukaryota	Hacrobia	Telonemia	Telonemia_X	Telonemia_XX	Telonemia-Group-2	Telonema_antarcticum
OTU_13287	0.000719144	0.00116912	4.02e-05	0.00020825	0	0	0	0	0	0.000266977	0.00100265	9.22e-05	0	0	0	0	0	0	0	0.000318504	0	0	0	0	0	0	0	0	0	0	0	0	0	0	0	0	0	Eukaryota	Eukaryota_unclassified	Eukaryota_unclassified	Eukaryota_unclassified	Eukaryota_unclassified	Eukaryota_unclassified	Eukaryota_unclassified
OTU_8906	0	2.25e-05	0	0.00020825	5.99e-05	0.000194381	0.00103261	0.000780738	0	2.43e-05	0	9.22e-05	0	7.71e-05	0	0	0	8.85e-05	0	0	0	0	0	0	0	3.36e-05	0.000138679	4.71e-05	0.000155106	0	0.000166269	0.000216779	2.21e-05	0.000837273	0.000177319	0.000289672	0.000355306	Eukaryota	Alveolata	Ciliophora	Spirotrichea	Strombidiida	Strombidiidae_M	Strombidiidae_M_unclassified
OTU_5322	0	0	0.000482732	0.000190896	8.99e-05	0.000380662	0	0	0	0	0	0	0	0	0	2.05e-05	0	0	0	0	0	0	0	0	0	0	1.73e-05	0	1.55e-05	0	0	0	2.21e-05	1.74e-05	3.22e-05	3.41e-05	3.74e-05	Eukaryota	Stramenopiles	Ochrophyta	Bacillariophyta	Bacillariophyta_X	Polar-centric-Mediophyceae	Chaetoceros_unclassified
OTU_2950	0	0	0.000442505	0.000190896	5.99e-05	0.000429258	0	5.04e-05	0	0	0	0	9.97e-05	0.000231446	3.52e-05	0.000266525	1.75e-05	0	0	0	0	0	0	0	0	0	1.73e-05	0	1.55e-05	2.1e-05	0	0.000108389	2.21e-05	0	0	0	0	Eukaryota	Alveolata	Dinoflagellata	Dinophyceae	Dinophyceae_unclassified	Dinophyceae_unclassified	Dinophyceae_unclassified
OTU_13891	0	0	0.000422391	0.000190896	3e-05	7.29e-05	0	0	0	0	0	0	1.42e-05	3.09e-05	0	0	0	0	0	0	0	0	0	0	0	0	1.73e-05	0	0	0	0	0	0	0	0	0	0	Eukaryota	Alveolata	Ciliophora	Spirotrichea	Strombidiida	Strombidiidae_R	Strombidium_biarmatum
OTU_3684	0	0	0.000402277	0.000190896	0.000119893	0.000259174	0	0	0	0	0	0	0	0	0	2.05e-05	0	1.77e-05	0	0	0	0	0	0	0	0	0	0	0	0	0	0	0	1.74e-05	0	1.7e-05	0	Eukaryota	Stramenopiles	Ochrophyta	Bacillariophyta	Bacillariophyta_X	Polar-centric-Mediophyceae	Chaetoceros_unclassified
OTU_11572	3e-05	0	0.000382163	0.000190896	0	8.1e-06	0	0	0	0	0	6.92e-05	0	1.54e-05	0	0	0	1.77e-05	0	0	0	0	1.61e-05	0	9.57e-05	0.000151314	0.000173349	0.000109964	0.000124085	2.1e-05	2.77e-05	5.42e-05	6.63e-05	6.98e-05	4.84e-05	0.000136316	3.74e-05	Eukaryota	Alveolata	Ciliophora	Spirotrichea	Strombidiida	Strombidiidae_R	Strombidium_R_unclassified
OTU_3825	0	0	0.000341935	0.000190896	0.00017984	7.29e-05	0	0	0	0	0	0	0	0.000216016	0	0.000102509	0	0	0	0	0	0	0	0	0	0	0	0	0	0	0	0	0	0	0	0	0	Eukaryota	Alveolata	Ciliophora	Spirotrichea	Strombidiida	Tontoniidae_B	Tontoniidae_B_X_sp.
OTU_923	0	0	0.000301708	0.000190896	5.99e-05	0.00010529	0	0	0	0	0	9.22e-05	0	0	0	0	0	1.77e-05	0	0	0	0	0	0	0.000164026	0.000100876	0.000312029	0.000172801	0.000170617	4.19e-05	0	0.000108389	2.21e-05	0.000209318	4.84e-05	6.82e-05	0	Eukaryota	Alveolata	Dinoflagellata	Dinophyceae	Gymnodiniales	Gymnodiniales_unclassified	Gymnodiniales_unclassified
OTU_1371	0	0	0.000281594	0.000190896	0.000149867	0.000121488	0.00228365	0.000982219	0	0	0	0	0	0	0	0	0	0	0	0	0	0	3.22e-05	0	4.1e-05	1.68e-05	3.47e-05	1.57e-05	9.31e-05	2.1e-05	2.77e-05	0	2.21e-05	8.72e-05	1.61e-05	5.11e-05	3.74e-05	Eukaryota	Stramenopiles	Ochrophyta	Bacillariophyta	Bacillariophyta_X	Polar-centric-Mediophyceae	Skeletonema_sp.
OTU_4902	0	0	0.00026148	0.000190896	0.000659413	0.00110959	0.000258152	0.000226666	0	0	0	2.31e-05	5.7e-05	7.71e-05	0	0.000369034	0.000122241	0.00026552	0	0	0	0	0	0	1.37e-05	6.73e-05	3.47e-05	0	3.1e-05	4.19e-05	0	7.23e-05	2.21e-05	0.000313977	1.61e-05	0.000187435	1.87e-05	Eukaryota	Alveolata	Dinoflagellata	Dinophyceae	Gymnodiniales	Gymnodiniaceae	Gyrodinium_unclassified
OTU_7037	0	0	0.00026148	0.000190896	5.99e-05	0.000121488	0.000258152	0.000302221	0	0	0	0	0	0	0	6.15e-05	0	0	0	0	0	0	1.61e-05	0	6.83e-05	0.000168127	3.47e-05	4.71e-05	4.65e-05	2.1e-05	0	0.000379363	0	0.000209318	6.45e-05	0.000255593	0	Eukaryota	Alveolata	Dinoflagellata	Dinophyceae	Gymnodiniales	Gymnodiniaceae	Gyrodinium_unclassified
OTU_1071	0	0	0.000241366	0.000190896	5.99e-05	8.91e-05	3.97e-05	0.000201481	0	0	0.00192174	0.000299705	2.85e-05	1.54e-05	0	0	0	1.77e-05	0	0	0	0	6.43e-05	2.86e-05	0	0	5.2e-05	0.000251347	1.55e-05	2.1e-05	0	1.81e-05	2.21e-05	0.000296534	1.61e-05	5.11e-05	3.74e-05	Eukaryota	Alveolata	Ciliophora	Litostomatea	Haptoria_4	Didiniidae	Didiniidae_X_sp.
OTU_4728	0	0	0.000241366	0.000190896	0.000599466	0.00190331	0	0	0	0	0	4.61e-05	2.85e-05	3.09e-05	1.76e-05	0.000225521	5.24e-05	1.77e-05	0	0	0	0	0	0	0	0	0	0	0	0	0	0	0	1.74e-05	0	0	0	Eukaryota	Alveolata	Dinoflagellata	Dinophyceae	Gymnodiniales	Gymnodiniaceae	Gyrodinium_helveticum
OTU_1545	0	0	0.000221252	0.000190896	3e-05	7.29e-05	7.94e-05	2.52e-05	0	0	0	0.000207488	0.000797528	0.000493751	0.000651868	0.000820075	0.000628667	0.000300922	0	0	0	0	0	0	0	1.68e-05	0	0	0.000201638	0	2.77e-05	3.61e-05	0	8.72e-05	0	5.11e-05	3.74e-05	Eukaryota	Stramenopiles	Stramenopiles_X	Stramenopiles_X-Group-7	Stramenopiles_X-Group-7_X	Stramenopiles_X-Group-7_XX	Stramenopiles_X-Group-7_XXX_sp.
OTU_18475	0.000239715	0.000179864	0.000201138	0.000190896	0	0	0	0	0	0	0	0	0	0	0	0	0	0	0	0	0	0	0	0	0	0	0	0	0	0	0	0	0	0	0	0	0	Eukaryota	Eukaryota_unclassified	Eukaryota_unclassified	Eukaryota_unclassified	Eukaryota_unclassified	Eukaryota_unclassified	Eukaryota_unclassified
OTU_16016	0.000928895	0.000831872	0.000181025	0.000190896	0	0	0	0	0.000755044	0.0038105	0.000640579	0	0	0	0	0	0	0	0.000260816	0.000868646	7.32e-05	0	0	0	0	0	0	0	0	0	0	0	0	0	0	0	0	Eukaryota	Stramenopiles	Ochrophyta	Chrysophyceae	Chrysophyceae_X	Chrysophyceae_Clade-C	Chrysophyceae_Clade-C_unclassified
OTU_914	0	0	0.000160911	0.000190896	0.00344693	0.00161174	1.99e-05	2.52e-05	0	0	0	2.31e-05	9.97e-05	0.000231446	3.52e-05	0.000102509	8.73e-05	0	0	0	0	0	0	0	2.73e-05	5.04e-05	8.67e-05	0	4.65e-05	6.29e-05	0.000110846	0.000126454	4.42e-05	0.000226761	4.84e-05	0.000357831	9.35e-05	Eukaryota	Archaeplastida	Chlorophyta	Mamiellophyceae	Mamiellales	Mamiellaceae	Micromonas polaris
OTU_22249	0	0	0.000160911	0.000190896	0.00062944	0.000283472	0.000119147	5.04e-05	0	0	0	0.000276651	7.12e-05	0.000401173	0	0.000902083	0.000454037	0.00026552	0	0	0	0	1.61e-05	0	0.000273377	0.000336253	0.000606722	0.000816878	0.000232659	0.000251572	0.000193981	0.00115615	4.42e-05	0.000732614	0.000257919	0.000613424	7.48e-05	Eukaryota	Alveolata	Dinoflagellata	Dinophyceae	Gymnodiniales	Gymnodiniaceae	Gymnodiniaceae_unclassified
OTU_22152	0	0	0.000140797	0.000190896	0.000419627	0.00115818	0.000238294	0.000226666	0	0	2.79e-05	0.00179823	0.00193685	0.00208301	0.000845666	0.00186567	0.000227019	0.00104438	0	0	0	0	0.000176926	0	1.37e-05	0.00057163	0.000606722	0.000345602	0.00324172	0.000377358	0.00180125	0.000270973	0.000751846	0.000540739	0.000612557	0.00136316	0.00129032	Eukaryota	Alveolata	Dinoflagellata	Dinophyceae	Dinophyceae_unclassified	Dinophyceae_unclassified	Dinophyceae_unclassified
OTU_3008	0	0	0.000140797	0.000190896	0.00026976	0.000340166	0.000278009	0.000151111	0	0	5.57e-05	0.00184434	0.000868735	0.000817775	0.00123326	0.000574053	0.000122241	0.00109748	3.26e-05	0	1.83e-05	0	0.00038602	0	0.000150357	0.00110964	0.000606722	0.000172801	0.00215598	0.000461216	0.00196752	0.000144519	0.000685507	0.000662841	0.000483598	0.000920136	0.000860215	Eukaryota	Alveolata	Dinoflagellata	Dinophyceae	Gymnodiniales	Gymnodiniaceae	Gymnodiniaceae_unclassified
OTU_13382	0.00853984	0.00355232	0.000120683	0.000190896	0	0	0	0	0.0159678	0.0137857	0.00022281	0	1.42e-05	0	0	0	0	0	0.0256577	0.00823766	0.020116	0.000215218	0	0	0.000164026	0	8.67e-05	0	0.000108574	0	0	0	0	0	0	0	0	Eukaryota	Hacrobia	Cryptophyta	Cryptophyceae	Cryptophyceae_X	Cryptomonadales	Cryptomonas_curvata
OTU_2554	0	0	0.000120683	0.000190896	5.99e-05	1.62e-05	0	0	0	0	2.79e-05	0.000184434	0.000512696	0.000432032	0.00193798	4.1e-05	0.000523889	0.000654948	0	0	0	0	0	0	2.73e-05	0.000168127	0.000676062	0.000219929	0.000325723	8.39e-05	0.000221693	0.000397428	0.000508602	0.000313977	0.000660917	0.000732701	0.000280505	Eukaryota	Hacrobia	Telonemia	Telonemia_X	Telonemia_XX	Telonemia-Group-2	Telonema_antarcticum
OTU_1243	0.00488419	0.00640766	8.05e-05	0.000190896	0	0	0	0	5.59e-05	0.00157759	0.000334215	0.000138325	0	0	1.76e-05	0	0	0	0.00032602	0.000854169	7.32e-05	5.87e-05	0	0	0	0	0	0	0	0	0	0	0	0	0	0	0	Eukaryota	Stramenopiles	Ochrophyta	Chrysophyceae	Chrysophyceae_X	Chrysophyceae_Clade-B1	Chrysophyceae_Clade-B1_X_sp.
OTU_210	0.00257693	0.000899321	8.05e-05	0.000190896	0	0	0	0	1.4e-05	7.28e-05	0	0	1.42e-05	1.54e-05	1.76e-05	0	0	0	0	0	0	0	0	0	0	0	0	0	0	0	0	0	0	0	0	0	0	Eukaryota	Stramenopiles	Ochrophyta	Ochrophyta_unclassified	Ochrophyta_unclassified	Ochrophyta_unclassified	Ochrophyta_unclassified
OTU_1780	0.00113864	0.00074194	4.02e-05	0.000190896	0	0	0	0	0.000111858	0	0	0	0	0	0	0	0	0	0	0.000694917	7.32e-05	0	0	0	0	0	0	0	0	0	0	0	0	0	0	0	0	Eukaryota	Hacrobia	Centroheliozoa	Centroheliozoa_X	Pterocystida	Pterocystidae	Pterocystis_foliacea
OTU_4748	0	0	4.02e-05	0.000190896	8.99e-05	8.1e-05	0	0	0	0	0	0	1.42e-05	4.63e-05	0	0	0	0	0	0	0	0	0	0	0	3.36e-05	3.47e-05	0	3.1e-05	0.000209644	0.000277116	0.000433557	2.21e-05	0.000313977	3.22e-05	3.41e-05	0	Eukaryota	Alveolata	Ciliophora	Spirotrichea	Spirotrichea_unclassified	Spirotrichea_unclassified	Spirotrichea_unclassified
OTU_427	0	0	4.02e-05	0.000190896	3e-05	1.62e-05	0	0	0	0	0	0	0.00297649	0.00124981	0.000916138	0.000410038	0.000541352	0	0	0	0	0	0	0	0.000246039	0.000235377	0.000364033	0.000801169	0.000496339	0.000922432	0.000110846	0.000379363	4.42e-05	0.000261648	1.61e-05	0.000357831	0	Eukaryota	Alveolata	Ciliophora	CONThreeP	CONThreeP_X	CONThreeP_XX	Askenasia_sp.
OTU_21312	0	0	4.02e-05	0.000190896	0.000209813	0.000291571	0.000933317	0.00158666	0	0	2.79e-05	0.000414976	0.000170899	0.000354884	0	0.000225521	0.00017463	5.31e-05	0	0	0	0	0	0	0	3.36e-05	0.000450708	6.28e-05	9.31e-05	0	0.000138558	7.23e-05	0.000221131	0.000104659	0.000209559	0.000255593	0.000205704	Eukaryota	Alveolata	Dinoflagellata	Dinophyceae	Dinophyceae_unclassified	Dinophyceae_unclassified	Dinophyceae_unclassified
OTU_424	0.00545351	0.00539593	4.02e-05	0.000190896	0	0	0	0	0.00054531	0.00160186	2.79e-05	0	0	0	0	0	0	0	0	2.9e-05	3.66e-05	0	0	0	0	0	0	0	0	0	0	0	0	0	0	0	0	Eukaryota	Alveolata	Dinoflagellata	Dinophyceae	Dinophyceae_unclassified	Dinophyceae_unclassified	Dinophyceae_unclassified
OTU_814	0	0	2.01e-05	0.000190896	0.000239787	0.000170083	0.00133047	0.00153629	0	0	0	0	4.27e-05	1.54e-05	0	0.000205019	0	0	0	0	0	0	0	0	0	0	0	0	1.55e-05	0	0	5.42e-05	4.42e-05	5.23e-05	0	0	3.74e-05	Eukaryota	Alveolata	Dinoflagellata	Syndiniales	Dino-Group-I	Dino-Group-I-Clade-5	Dino-Group-I-Clade-5_X_sp.
OTU_796	0	0	0.0014482	0.000173542	0.00206816	0.00468944	0.000218436	0	0	0	0	2.31e-05	0.000370281	0.00109551	1.76e-05	0.00075857	0.000419111	3.54e-05	0	0	0	0	0	0	0	0	3.47e-05	0	0.000170617	0	0	1.81e-05	0	6.98e-05	4.84e-05	1.7e-05	0	Eukaryota	Alveolata	Dinoflagellata	Dinophyceae	Gymnodiniales	Gymnodiniaceae	Balechina_pachydermata
OTU_3547	0	0	0.000764326	0.000173542	0.00017984	0.000785622	0	0	0	0	0	0	0	0	0	0	0	0	0	0	0	0	0	0	0	0	0	0	0	0	0	0	0	0	0	0	0	Eukaryota	Stramenopiles	Ochrophyta	Bacillariophyta	Bacillariophyta_X	Polar-centric-Mediophyceae	Chaetoceros_unclassified
OTU_7963	0	0	0.000402277	0.000173542	0.00017984	0.00127967	0	2.52e-05	0	0	0	4.61e-05	0.000227865	3.09e-05	5.29e-05	0.000287026	6.99e-05	3.54e-05	0	0	0	0	0	0	0	0	0	0	0	2.1e-05	0	0	0	0	0	1.7e-05	0	Eukaryota	Stramenopiles	Ochrophyta	Bacillariophyta	Bacillariophyta_X	Polar-centric-Mediophyceae	Chaetoceros_unclassified
OTU_1586	0	0	0.000382163	0.000173542	3e-05	8.1e-06	0	0	0	0	0	0.00087606	7.12e-05	0.000108008	0	2.05e-05	0	7.08e-05	0	1.45e-05	0	0	0.00106155	0	0.00412799	0.00418635	0.00225354	0.000722623	0.00127187	0.00102725	0.00141329	0.000198714	0.000375923	8.72e-05	0.000822117	0.000306712	0.000280505	Eukaryota	Alveolata	Ciliophora	Spirotrichea	Strombidiida	Strombidiidae_R	Strombidiidae_R_X_sp.
OTU_3586	0	0	0.000321822	0.000173542	5.99e-05	4.86e-05	0	0	0	0	0	4.61e-05	0	1.54e-05	0	2.05e-05	0	5.31e-05	0	0	0	0	0	0	0.000109351	0.00031944	0.000468043	0.000408439	0.000108574	0.000104822	0.000332539	9.03e-05	8.85e-05	0.000279091	0.000225679	0.000255593	9.35e-05	Eukaryota	Alveolata	Ciliophora	Spirotrichea	Strombidiida	Strombidiidae_R	Strombidium_R_unclassified
OTU_8968	0	0	0.000301708	0.000173542	0.0004496	0.000234877	0	0	0	0	0	0	0	0	0	0	0	0	0	0	1.83e-05	0	0	0	0	0	0	0	0	0	0	0	0	0	1.61e-05	0	0	Eukaryota	Hacrobia	Cryptophyta	Cryptophyceae	Cryptophyceae_X	Cryptomonadales	Teleaulax_amphioxeia
OTU_10995	0	6.74e-05	0.00026148	0.000173542	0.000869226	0.000469754	0.000158863	0.000352592	0	0	0.00220025	0.00235153	0.00279135	0.00231446	0.00503876	0.00145563	0.00663593	0.00249588	0	0	0	0	0.000209094	0.000200458	0.00110718	0.000487567	0.00201085	0.000879715	0.00139595	0.00599581	0.00210608	0.00191488	0.010548	0.00334909	0.00788265	0.00381686	0.00323516	Eukaryota	Archaeplastida	Chlorophyta	Mamiellophyceae	Mamiellales	Mamiellaceae	Micromonas_unclassified
OTU_2500	0	0	0.00026148	0.000173542	0.000509547	0.000477853	3.97e-05	2.52e-05	0	0	0	0	2.85e-05	1.54e-05	0	2.05e-05	1.75e-05	1.77e-05	0	0	0	0	1.61e-05	0	0	0	0	0	0	0	0	0	0	3.49e-05	3.22e-05	1.7e-05	0	Eukaryota	Hacrobia	Cryptophyta	Cryptophyceae	Cryptophyceae_X	Cryptomonadales	Cryptomonadales_unclassified
OTU_6982	0	0	0.00026148	0.000173542	0.000149867	2.43e-05	0.000139005	0.000125926	0	0	0	0.00016138	0.000128174	0.000246875	3.52e-05	0.000574053	0.000785834	0.000123909	0	0	5.49e-05	1.96e-05	0	0	8.2e-05	0.000168127	0.000208019	1.57e-05	0.000217149	0.000104822	0.000138558	0.000343233	8.85e-05	0.000488409	0.000209559	0.000562305	3.74e-05	Eukaryota	Alveolata	Dinoflagellata	Dinophyceae	Gymnodiniales	Gymnodiniaceae	Gyrodinium_helveticum
OTU_635	0.00164804	0.000944287	0.00026148	0.000173542	0	0	0	0	0	0.000752391	0.000111405	0	0	0	0	0	0	0	3.26e-05	0.000419846	0.000604031	3.91e-05	0	0	0	1.68e-05	0	0	1.55e-05	0	0	0	0	0	0	0	0	Eukaryota	Alveolata	Perkinsea	Perkinsida	Perkinsida_X	Perkinsida_XX	Perkinsida_XXX_sp.
OTU_11513	0	0	0.000241366	0.000173542	0	0	0	0	0	0	2.79e-05	0.000299705	0	0	0	0	0	1.77e-05	0	0	0	0	1.61e-05	0	0.000341721	0.000235377	0.000138679	0.000675495	0.000310212	0.000125786	0.000443385	0	2.21e-05	0	0	1.7e-05	0	Eukaryota	Alveolata	Ciliophora	Spirotrichea	Strombidiida	Strombidiidae_R	Strombidium_R_unclassified
OTU_6733	0	0	0.000221252	0.000173542	0.000389653	0.000267274	0	5.04e-05	0	0	0	0	0	0	0	0	0	0	0	0	0	0	0	0	0	0	0	1.57e-05	0	0	0	0	4.42e-05	1.74e-05	0	1.7e-05	0	Eukaryota	Hacrobia	Cryptophyta	Cryptophyceae	Cryptophyceae_X	Cryptomonadales	Cryptomonadales_unclassified
OTU_6988	0	0	0.000201138	0.000173542	0.000329707	5.67e-05	0.000278009	0.000226666	2.8e-05	0	0.00022281	0.00152158	0.002535	0.00232989	0.000281889	0.00118911	0.000960464	0.00253129	0	1.45e-05	0	0.000136957	0.00046644	0.000229095	0.000806463	0.00116007	0.00162948	0.00147666	0.0016131	0.00301887	0.00282658	0.00227618	0.00280837	0.000976818	0.00206335	0.000971254	0.00162693	Eukaryota	Hacrobia	Cryptophyta	Cryptophyceae	Cryptophyceae_X	Cryptomonadales	Teleaulax_gracilis
OTU_9409	0	0	0.000201138	0.000173542	8.99e-05	8.91e-05	0.000397156	0.000428147	0	0	0.000584877	0.00207488	0.00422975	0.00263848	0.000229035	0.0010661	0.00104778	0.00608925	0	0	0	0.000273914	0.00110981	0.000400916	0.00143523	0.00151314	0.00176816	0.00237209	0.00173719	0.00337526	0.00224464	0.00346846	0.00358233	0.000959375	0.00214395	0.00120981	0.00179523	Eukaryota	Hacrobia	Cryptophyta	Cryptophyceae	Cryptophyceae_X	Cryptomonadales	Teleaulax_gracilis
OTU_5093	0	0	0.000201138	0.000173542	0.000119893	0.000218678	0.000357441	0.000226666	0	0	0	0.000115271	5.7e-05	0.000154297	0.000105708	0.000102509	1.75e-05	0.000106208	0	0	0	0	0	0	0	8.41e-05	0.000277359	0	4.65e-05	0	0.000692789	3.61e-05	0.000420149	0.000104659	0.000483598	0.000204475	0.000317906	Eukaryota	Alveolata	Dinoflagellata	Dinophyceae	Dinophyceae_unclassified	Dinophyceae_unclassified	Dinophyceae_unclassified
OTU_1519	0.00413508	0.00236072	0.000201138	0.000173542	0	8.1e-06	0	0	0.000349557	0.0016504	0.00261802	0.000253596	1.42e-05	4.63e-05	5.29e-05	0	3.49e-05	0	0.0111173	0.000304026	0.00312998	0.00238696	0.000209094	7.16e-05	2.73e-05	0	1.73e-05	0	0	0	0	0	0	0	0	0	0	Eukaryota	Alveolata	Dinoflagellata	Dinophyceae	Peridiniales	Thoracosphaeraceae	Thoracosphaeraceae_unclassified
OTU_1018	0.00401522	0.00771168	0.000181025	0.000173542	0	0	0	0	0	0	0	0	0	0	3.52e-05	0	0	0	0	0	0	0	0	0	0	0	0	0	0	0	0	0	0	0	0	0	0	Eukaryota	Rhizaria	Cercozoa	Novel-clade-10-12	Novel-clade-10	Novel-clade-10_X	Novel-clade-10_XX_sp.
OTU_5161	0	0	0.000181025	0.000173542	0.000239787	5.67e-05	0	5.04e-05	0	0	0	0	0	1.54e-05	0	0	0	0	0	0	0	0	0	0	0	0	0.00010401	4.71e-05	3.1e-05	0.000167715	0.000166269	0.000830985	8.85e-05	8.72e-05	4.84e-05	3.41e-05	0.000168303	Eukaryota	Eukaryota_unclassified	Eukaryota_unclassified	Eukaryota_unclassified	Eukaryota_unclassified	Eukaryota_unclassified	Eukaryota_unclassified
OTU_5101	0.000419501	0.000449661	0.000181025	0.000173542	0	0	0	0	1.4e-05	0.000145624	0	0	0	0	0	0	0	0	0	2.9e-05	0.000475903	7.83e-05	0	0	0	0	0	0	0	0	0	0	0	0	0	0	0	Eukaryota	Hacrobia	Katablepharidophyta	Katablepharidaceae	Katablepharidales	Katablepharidales_X	Katablepharidales_XX_sp.
OTU_818	0	0	0.000181025	0.000173542	5.99e-05	1.62e-05	0	0	0	0	0	0.000115271	0.000384522	0.000339454	0.00167371	4.1e-05	0.000506426	0.000778858	0	0	0	0	0	0	2.73e-05	0.000117689	0.000485378	0.000282765	0.000527361	0.000209644	0.000387962	0.000523882	0.000906638	0.00033142	0.000612557	0.000920136	0.000187003	Eukaryota	Hacrobia	Telonemia	Telonemia_X	Telonemia_XX	Telonemia-Group-2	Telonema_antarcticum
OTU_379	0.000958859	0.00175368	0.000160911	0.000173542	0	0	0	0	0	0.00148051	0.000501323	0.000207488	1.42e-05	0	0	0	0	0	0	0.0081508	0	0	0	0	0	0	0	0	0	0	0	0	0	0	0	0	0	Eukaryota	Alveolata	Alveolata_unclassified	Alveolata_unclassified	Alveolata_unclassified	Alveolata_unclassified	Alveolata_unclassified
OTU_3274	0	6.74e-05	0.000160911	0.000173542	0.00206816	0.00225968	0.000139005	0.000226666	0	0	0	0.000184434	2.85e-05	0.000154297	0	0.0011276	6.99e-05	0.000177013	0	0	0	0	0	0	6.83e-05	0.000285815	0.000242689	0.000141383	0.000325723	0.000125786	0.000498808	0.000505817	4.42e-05	0.00120358	0.000241799	0.000613424	0.000374007	Eukaryota	Alveolata	Dinoflagellata	Dinophyceae	Dinophyceae_unclassified	Dinophyceae_unclassified	Dinophyceae_unclassified
OTU_1777	0	0	0.000160911	0.000173542	0.000149867	2.43e-05	3.97e-05	0.000176296	0	0	0	0	4.27e-05	7.71e-05	0.00017618	0	0.000488963	0	0	0	0	0	0	0	0	0	0	0	0	0	2.77e-05	0	0	0	1.61e-05	0	1.87e-05	Eukaryota	Stramenopiles	Ochrophyta	Bolidophyceae	Parmales	Parmales_env_3	Parmales_env_3A_sp.
OTU_3400	0	0	0.000140797	0.000173542	5.99e-05	0.000218678	0	0	0	0	0	0	1.42e-05	7.71e-05	3.52e-05	0.000102509	0	0	0	0	0	0	0	0	0	0	0	0	0	0	0	0	0	0	0	0	0	Eukaryota	Alveolata	Dinoflagellata	Dinophyceae	Gonyaulacales	Goniodomataceae	Alexandrium_unclassified
OTU_687	0.000449465	0.00101174	0.000120683	0.000173542	0	0	0	0	0	0	0.000473472	4.61e-05	0	0	0	0	0	0	0.000228214	1.45e-05	1.83e-05	5.87e-05	0	0	0	0	0	0	0	0	0	0	0	0	0	0	0	Eukaryota	Opisthokonta	Choanoflagellida	Choanoflagellatea	Choanoflagellatea_X	Choanoflagellatea_X_Group_L	Choanoflagellatea_X_Group_L_X_sp.
OTU_2149	0	0	0.000100569	0.000173542	0.000209813	2.43e-05	3.97e-05	7.56e-05	0	0	0.000640579	0.000645518	0.000156657	9.26e-05	0.000334743	0.0010866	0.000873149	0.000247818	0	0	0	0	0	0	2.73e-05	6.73e-05	1.73e-05	4.71e-05	6.2e-05	0.000356394	5.54e-05	0.000108389	0.000110566	3.49e-05	1.61e-05	6.82e-05	0	Eukaryota	Rhizaria	Cercozoa	Filosa-Thecofilosea	Cryomonadida	Protaspa-lineage	Protaspa-lineage_X_sp.
OTU_550	0	0	0.000100569	0.000173542	0.00230795	0.000955705	0.000119147	5.04e-05	0	0	0	4.61e-05	0.000170899	0.000200586	0.000105708	0.000164015	8.73e-05	0.000177013	0	0	0	0	0	0	0	5.04e-05	0.000364033	4.71e-05	0.000108574	0.000230608	0.000249404	0.000397428	0.000243244	0.00038375	0.000257919	0.000477107	0.000243104	Eukaryota	Archaeplastida	Chlorophyta	Mamiellophyceae	Mamiellales	Bathycoccaceae	Bathycoccus_prasinos
OTU_5544	0	0	0.000100569	0.000173542	5.99e-05	5.67e-05	0	0	0	0	0	2.31e-05	5.7e-05	0.00117266	0	0.000307528	0.000104778	0	0	0	0	0	0	0	0	0	0	0	0	0	0	0	0	0	0	0	1.87e-05	Eukaryota	Alveolata	Ciliophora	Spirotrichea	Strombidiida	Tontoniidae_B	Tontoniidae_B_X_sp.
OTU_15759	0	0	0.000100569	0.000173542	0.000329707	0.000267274	0.00123119	0.00158666	0	0	0.000111405	0.000368868	5.7e-05	0.000231446	0.00017618	0.000307528	0.000733445	0.000424831	0	0	0	0	0	0	6.83e-05	0.000453942	0.00121345	0.000486985	0.000496339	0.000209644	0.000637366	0.000758725	0.000862412	0.00139545	0.00143467	0.0021981	0.00143993	Eukaryota	Alveolata	Dinoflagellata	Dinophyceae	Dinophyceae_unclassified	Dinophyceae_unclassified	Dinophyceae_unclassified
OTU_4642	0	0	0.000100569	0.000173542	0.00062944	0.000558845	7.94e-05	0	0	0	2.79e-05	2.31e-05	0.00140992	0.000879494	0.0017618	0.00116861	0.00106524	8.85e-05	0	0	0	1.96e-05	0	0	0	0	0	1.57e-05	0	0	0	0	0	0	0	0	0	Eukaryota	Stramenopiles	Ochrophyta	Bacillariophyta	Bacillariophyta_X	Polar-centric-Mediophyceae	Polar-centric-Mediophyceae_unclassified
OTU_9494	0	0	0.000100569	0.000173542	0	8.1e-06	0	0	0	0	0	6.92e-05	0	3.09e-05	5.29e-05	0	3.49e-05	0.00014161	0	0	0	0	0	0	1.37e-05	0.000134501	0.000121344	0.000157092	0.000155106	0	2.77e-05	0	0	5.23e-05	9.67e-05	1.7e-05	3.74e-05	Eukaryota	Hacrobia	Telonemia	Telonemia_X	Telonemia_XX	Telonemia-Group-2	Telonema_antarcticum
OTU_1541	0.000389536	0.000696974	8.05e-05	0.000173542	0	0	0	0	0	0	0	0	0	0	0	0	0	0	0	0	0	0	0	0	0	0	0	0	0	0	0	0	0	0	0	0	0	Eukaryota	Opisthokonta	Choanoflagellida	Choanoflagellatea	Craspedida	Monosigidae_Group_A	Monosiga_ovata
OTU_5168	0	0	8.05e-05	0.000173542	0	0.000226778	0	0	0	0	0	0	1.42e-05	1.54e-05	0	0	0	0	0	0	0	0	0	0	0	3.36e-05	0	0	0	0	0	0	0	0	0	0	0	Eukaryota	Alveolata	Dinoflagellata	Dinophyceae	Gonyaulacales	Goniodomataceae	Alexandrium_unclassified
OTU_530	0.00575315	0.00658753	8.05e-05	0.000173542	0	0	0	0	0	0	0	0	4.27e-05	0	3.52e-05	0	0	0	0	0	0	0	0	0	0	0	0	0	0	0	0	0	0	0	0	0	0	Eukaryota	Alveolata	Dinoflagellata	Dinophyceae	Dinophyceae_unclassified	Dinophyceae_unclassified	Dinophyceae_unclassified
OTU_1642	0	0	8.05e-05	0.000173542	0.000299733	8.91e-05	0.000496445	0.000352592	0	0	0	0.00016138	8.54e-05	0.000123438	0.000440451	0.000184517	0.00164152	1.77e-05	0	0	0	0	0	0	0	0	0	0	0	0	0	0	0	0	0	0	0	Eukaryota	Opisthokonta	Opisthokonta_X	Opisthokonta_XX	Opisthokonta_XXX	Opisthokonta_XXXX	Opisthokonta_XXXXX_sp.
OTU_15333	0	0	6.03e-05	0.000173542	3e-05	1.62e-05	0	2.52e-05	0	0	0	0	1.42e-05	0	0	4.1e-05	0	0	0	0	0	0	0	0	1.37e-05	0	0	0	0	0	0	0	0	0	0	0	1.87e-05	Eukaryota	Alveolata	Dinoflagellata	Dinophyceae	Gymnodiniales	Gymnodiniaceae	Gymnodiniaceae_unclassified
OTU_367	0.00479429	0.00485633	6.03e-05	0.000173542	0	0	0	0	0.00416672	0.0192466	0.000389918	4.61e-05	0	0	0	0	0	0	0.000260816	0.00529874	0.000292863	0	0	0	0	0	0	0	0	0	0	0	0	0	0	0	0	Eukaryota	Stramenopiles	Ochrophyta	Chrysophyceae	Chrysophyceae_X	Chrysophyceae_XX	Chrysophyceae_XXX_sp.
OTU_2717	0	0	2.01e-05	0.000173542	0.000479573	0.00060744	0	0	0	0	0	6.92e-05	4.27e-05	6.17e-05	0.000158562	0.000123011	0.000401649	0	0	0	0	0	0	0	1.37e-05	0	0	0	0	0	0	3.61e-05	2.21e-05	0	0	0	0	Eukaryota	Archaeplastida	Chlorophyta	Pyramimonadales	Pyramimonadales_X	Pyramimonadales_XX	Pterosperma_unclassified
OTU_2574	0	0	2.01e-05	0.000173542	0.000209813	0.000161984	0	5.04e-05	0	0	0	0	4.27e-05	0.000293165	0	0.000164015	0	0	0	0	0	0	0	0	0	0	1.73e-05	0	0	0	0	0	0	0	0	1.7e-05	0	Eukaryota	Alveolata	Dinoflagellata	Dinophyceae	Dinophyceae_unclassified	Dinophyceae_unclassified	Dinophyceae_unclassified
OTU_2606	5.99e-05	6.74e-05	2.01e-05	0.000173542	0.00017984	1.62e-05	0	0	0	0	0	0	0	0	0	0	0	0	0	0	0	0	0	0	0	0	0	0	0	0	0	0	0	0	0	0	0	Eukaryota	Hacrobia	Telonemia	Telonemia_X	Telonemia_XX	Telonemia-Group-2	Telonemia-Group-2_X_sp.
OTU_5594	0	0	0	0.000173542	0.00080928	0.000259174	0	0	0	0	0	2.31e-05	7.12e-05	0.000123438	0	0	0	1.77e-05	0	0	0	0	1.61e-05	0	0	0	1.73e-05	3.14e-05	1.55e-05	0.000293501	8.31e-05	0.00074066	0	0.000470966	9.67e-05	6.82e-05	0	Eukaryota	Alveolata	Ciliophora	Spirotrichea	Spirotrichea_unclassified	Spirotrichea_unclassified	Spirotrichea_unclassified
OTU_1986	0.00020975	0.000202347	0	0.000173542	0	0	0	0	0.000209734	0	0	0	0	0	0	0	0	0	0.00273857	0	0.00613182	0.00105652	0	0	4.1e-05	0	3.47e-05	1.57e-05	4.65e-05	0	0	0	0	0	0	1.7e-05	0	Eukaryota	Alveolata	Ciliophora	Litostomatea	Litostomatea_X	Litostomatea_XX	Litostomatea_XXX_sp.
OTU_4474	0	0	0.000603415	0.000156188	0.000329707	7.29e-05	1.99e-05	0	0	0	0	0	0	3.09e-05	0	0	0	0	0	0	0	0	0	0	0	1.68e-05	3.47e-05	4.71e-05	1.55e-05	0.000167715	8.31e-05	7.23e-05	0	1.74e-05	0	0	0	Eukaryota	Alveolata	Dinoflagellata	Dinophyceae	Dinophyceae_unclassified	Dinophyceae_unclassified	Dinophyceae_unclassified
OTU_3774	0	0	0.000422391	0.000156188	0	0	0	0	0	0	0	0	0	1.54e-05	0	0	0	7.08e-05	0	0	0	0	0	0	6.83e-05	0.000134501	0.000208019	0.000282765	7.76e-05	0.000146751	0.000138558	5.42e-05	4.42e-05	8.72e-05	4.84e-05	6.82e-05	0	Eukaryota	Alveolata	Ciliophora	Spirotrichea	Strombidiida	Strombidiidae_R	Strombidiidae_R_X_sp.
OTU_3318	0	0	0.000341935	0.000156188	0	0.000210579	0	7.56e-05	0	0	0	0.000345813	0	0	0	8.2e-05	0	3.54e-05	0	0	0	0	1.61e-05	0	0.000423735	0.00082382	0.000329364	0.000125674	0.00024817	2.1e-05	0.000304827	0	6.63e-05	0.000279091	6.45e-05	0.000187435	9.35e-05	Eukaryota	Alveolata	Dinoflagellata	Dinophyceae	Gymnodiniales	Gymnodiniales_unclassified	Gymnodiniales_unclassified
OTU_148	0.00734126	0.00386708	0.000341935	0.000156188	0	0	0	0	0.00183168	0.00502403	0.00367637	0.000760789	0.000156657	1.54e-05	0.000158562	0	1.75e-05	0	0.000619437	0.000405368	0.000951806	0.000391305	0	0	0	0	0	0	3.1e-05	0	0	0	0	0	0	0	0	Eukaryota	Alveolata	Dinoflagellata	Dinophyceae	Suessiales	Suessiaceae	Suessiaceae_unclassified
OTU_6442	3e-05	0	0.000301708	0.000156188	0.00104907	0.000599341	9.93e-05	0.000176296	0	0	0	4.61e-05	4.27e-05	0.000246875	0	0.00032803	0.000122241	0.000177013	0	0	0	0	0	0	0.000136689	0.000235377	0.000277359	0.000329893	0.000201638	0.000314465	0.000138558	0.000830985	0.000132679	0.000732614	0.000209559	0.000732701	0.000149603	Eukaryota	Alveolata	Dinoflagellata	Dinophyceae	Dinophyceae_unclassified	Dinophyceae_unclassified	Dinophyceae_unclassified
OTU_11310	0	0	0.000241366	0.000156188	0	1.62e-05	0	0	0	0	0	0.000138325	2.85e-05	3.09e-05	0	2.05e-05	3.49e-05	5.31e-05	0	0	0	0	3.22e-05	0	0.000177695	8.41e-05	0.000190684	0.000141383	0.000186127	0.000461216	0.000277116	0.000108389	0.000398036	0.000156989	0.000225679	0.000204475	5.61e-05	Eukaryota	Alveolata	Ciliophora	Spirotrichea	Strombidiida	Strombidiidae_R	Strombidium_biarmatum
OTU_5790	0	0	0.000221252	0.000156188	5.99e-05	0	0	0	0	0	0	0.000645518	9.97e-05	0.000216016	0	2.05e-05	1.75e-05	1.77e-05	0	0	3.66e-05	0	0.000691619	7.16e-05	0.00258341	0.00210158	0.00227088	0.000329893	0.00076002	0.000566038	0.00155185	0.000289038	0.000464376	0.000174432	0.00103168	0.000340791	0.000448808	Eukaryota	Alveolata	Ciliophora	Spirotrichea	Strombidiida	Strombidiida_unclassified	Strombidiida_unclassified
OTU_3301	0	0	0.000201138	0.000156188	0.00026976	0.000315869	5.96e-05	0.000125926	0	0	0	4.61e-05	2.85e-05	1.54e-05	0	8.2e-05	0	0	0	0	0	0	0	0	0	0	0	0	1.55e-05	0	0	0	0	0.000191875	0	1.7e-05	0	Eukaryota	Alveolata	Ciliophora	CONThreeP	CONThreeP_X	CONThreeP_XX	Askenasia_sp.
OTU_3422	0	0	0.000201138	0.000156188	0.000239787	0.000348266	3.97e-05	7.56e-05	0	0	0	0.000322759	0.000754803	9.26e-05	7.05e-05	0.000143513	0	3.54e-05	0	0	0	0	0.000160842	7.16e-05	0.0008338	0.000622068	0.000121344	9.43e-05	0.000108574	0.000230608	0	5.42e-05	0	3.49e-05	3.22e-05	0.000136316	0.000112202	Eukaryota	Alveolata	Dinoflagellata	Dinophyceae	Dinophyceae_unclassified	Dinophyceae_unclassified	Dinophyceae_unclassified
OTU_2903	0	0	0.000201138	0.000156188	0.000389653	0.000129587	0	0	0	0	0	2.31e-05	1.42e-05	4.63e-05	0	6.15e-05	0	0.000106208	0	0	0	0	0	0	8.2e-05	6.73e-05	0.000260024	0.000298475	3.1e-05	0.000503145	0.000110846	0.000921309	6.63e-05	0.000261648	8.06e-05	0.000204475	5.61e-05	Eukaryota	Eukaryota_unclassified	Eukaryota_unclassified	Eukaryota_unclassified	Eukaryota_unclassified	Eukaryota_unclassified	Eukaryota_unclassified
OTU_1009	0	0	0.000181025	0.000156188	0.000209813	0.000129587	0.000436872	0.000402962	0	0	0.000473472	0.00126798	0.000840252	0.00398087	3.52e-05	0.000369034	0.000314334	0.000513338	0	0	0	0	0	0	2.73e-05	0.000100876	0.000312029	6.28e-05	0.000186127	0.000167715	5.54e-05	0.000234844	6.63e-05	0.000191875	0.000193439	0.000153356	0.000149603	Eukaryota	Alveolata	Dinoflagellata	Dinophyceae	Dinophyceae_unclassified	Dinophyceae_unclassified	Dinophyceae_unclassified
OTU_2200	0	0	0.000181025	0.000156188	5.99e-05	0.000178182	3.97e-05	2.52e-05	0	0	0	0	2.85e-05	0.000108008	0	0.000143513	0	0	0	0	0	0	0	0	0	0	0	0	0	0	0	0.000126454	0	0	0	0	0	Eukaryota	Alveolata	Dinoflagellata	Dinophyceae	Dinophyceae_unclassified	Dinophyceae_unclassified	Dinophyceae_unclassified
OTU_6149	0	0	0.000181025	0.000156188	0	8.1e-06	0	2.52e-05	0	0	0	4.61e-05	0	0	0	0	0	1.77e-05	0	0	0	1.96e-05	0.000289515	7.16e-05	5.47e-05	0.000100876	5.2e-05	0.00018851	0.000124085	6.29e-05	2.77e-05	7.23e-05	0	1.74e-05	1.61e-05	0	0	Eukaryota	Alveolata	Dinoflagellata	Dinophyceae	Peridiniales	Heterocapsaceae	Heterocapsa_unclassified
OTU_5826	0	0	0.000160911	0.000156188	0.00200821	0.000477853	3.97e-05	7.56e-05	0	0	2.79e-05	9.22e-05	0.000170899	0.000308594	0.000317125	6.15e-05	0.000209556	0.000212416	0	0	0	0	8.04e-05	0	2.73e-05	0	0.000173349	7.85e-05	4.65e-05	0.000524109	0.000110846	0.000541947	0.000265358	0.000191875	0.000322399	0.000306712	0.000168303	Eukaryota	Archaeplastida	Chlorophyta	Mamiellophyceae	Mamiellales	Bathycoccaceae	Bathycoccus_prasinos
OTU_6390	0	0	0.000160911	0.000156188	3e-05	8.1e-06	0	0	0	0	0	0	0	0	0	0	0	0	0	0	0	0	0	0	0	0	1.73e-05	1.57e-05	0	8.39e-05	0	7.23e-05	0	0.000139545	0	0	0	Eukaryota	Alveolata	Ciliophora	Spirotrichea	Spirotrichea_unclassified	Spirotrichea_unclassified	Spirotrichea_unclassified
OTU_2670	0.00149822	0.0014614	0.000160911	0.000156188	0	0	0	0	8.39e-05	0.000461143	0.000167108	4.61e-05	0	0	0	0	0	0	6.52e-05	0.000752827	1.83e-05	0	0	0	0	0	0	0	0	0	0	0	0	0	0	0	0	Eukaryota	Stramenopiles	Ochrophyta	Chrysophyceae	Chrysophyceae_X	Chrysophyceae_Clade-C	Chrysophyceae_Clade-C_unclassified
OTU_7005	0	0	0.000140797	0.000156188	8.99e-05	0.000210579	7.94e-05	2.52e-05	0	0	0	2.31e-05	9.97e-05	7.71e-05	0	0.000348532	1.75e-05	1.77e-05	0	0	0	0	0	0	0	1.68e-05	0	0	0	0	0	0	0	0	0	0	0	Eukaryota	Alveolata	Dinoflagellata	Dinophyceae	Dinophyceae_unclassified	Dinophyceae_unclassified	Dinophyceae_unclassified
OTU_4782	0.00374554	0.00508116	0.000140797	0.000156188	0	0	0	0	0.000335575	0.000388331	0.00311934	0.000138325	1.42e-05	0	1.76e-05	0	0	0	0.000260816	0.000130297	0.00102502	0.000391305	0	0	0	0	0	0	0	0	0	0	0	0	0	0	0	Eukaryota	Hacrobia	Katablepharidophyta	Katablepharidaceae	Katablepharidales	Katablepharidales_X	Katablepharidales_XX_sp.
OTU_19997	0	0	0.000120683	0.000156188	0.000149867	0.000178182	0	0	0	0	0	0	0	0	0	0	0	0	0	0	0	0	0	0	0	0	0	0	0	4.19e-05	0	0.000270973	0	0.000191875	1.61e-05	5.11e-05	0	Eukaryota	Alveolata	Alveolata_unclassified	Alveolata_unclassified	Alveolata_unclassified	Alveolata_unclassified	Alveolata_unclassified
OTU_5184	0	0	0.000120683	0.000156188	3e-05	0	0	0.000151111	0	0	0	0	0	0	0	0	0	0	0	0	0	0	0	0	0	0	3.47e-05	0	0	0	0	0	0	0	0	0	1.87e-05	Eukaryota	Alveolata	Ciliophora	Spirotrichea	Choreotrichida	Leegaardiellidae_B	Leegaardiella_sp.
OTU_28	0.00200761	0.00170871	0.000120683	0.000156188	0	0	0	0	0.000531327	0.00177176	0.00796546	0.000368868	1.42e-05	0	0.000352361	0	0	1.77e-05	0.0318847	0.000231639	0.0117328	0.0104087	0.000305599	0.000357961	0.000164026	1.68e-05	3.47e-05	1.57e-05	3.1e-05	0	0	0	0	0	0	1.7e-05	0	Eukaryota	Alveolata	Dinoflagellata	Dinophyceae	Peridiniales	Thoracosphaeraceae	Thoracosphaeraceae_unclassified
OTU_7297	0	0	0.000120683	0.000156188	0.00017984	0.000242976	0	0	0	0	0	2.31e-05	0.000284831	3.09e-05	5.29e-05	0.000307528	0.000227019	8.85e-05	0	0	0	0	0	0	0	1.68e-05	0	0	0	2.1e-05	0	0	0	3.49e-05	0	1.7e-05	0	Eukaryota	Stramenopiles	Ochrophyta	Bacillariophyta	Bacillariophyta_X	Polar-centric-Mediophyceae	Chaetoceros_decipiens
OTU_4448	0	0	0.000100569	0.000156188	0.000149867	2.43e-05	0.000158863	0.000226666	0	0	0.000473472	0.00168296	0.00420126	0.00242247	0.000140944	0.000963589	0.00132719	0.0054166	0	0	0	0.000293479	0.00106155	0.000501145	0.000929482	0.00104239	0.00188951	0.00185369	0.001458	0.00371069	0.00213379	0.00292651	0.00309584	0.000819829	0.00204723	0.000630463	0.00155213	Eukaryota	Hacrobia	Cryptophyta	Cryptophyceae	Cryptophyceae_X	Cryptomonadales	Teleaulax_gracilis
OTU_12966	0	0	0.000100569	0.000156188	3e-05	6.48e-05	0.00017872	0.000201481	5.59e-05	2.43e-05	0.000501323	0.00182128	0.00514121	0.0031168	0.000105708	0.00131212	0.00139704	0.00708052	0	2.9e-05	0	0.000156522	0.00136715	0.000601375	0.00151724	0.00152995	0.0021322	0.00270198	0.00196985	0.00431866	0.00252175	0.00261941	0.00415727	0.00122102	0.00225679	0.00139724	0.00138382	Eukaryota	Hacrobia	Cryptophyta	Cryptophyceae	Cryptophyceae_X	Cryptomonadales	Teleaulax_gracilis
OTU_21624	0	2.25e-05	0.000100569	0.000156188	0.000119893	8.91e-05	0.000278009	0.000251851	0	0	0	0	0.000170899	0.000493751	0	0.000102509	1.75e-05	0	0	0	1.83e-05	0	0	0	0	1.68e-05	0	4.71e-05	3.1e-05	0	0	3.61e-05	0	3.49e-05	0	1.7e-05	0	Eukaryota	Alveolata	Dinoflagellata	Dinophyceae	Dinophyceae_unclassified	Dinophyceae_unclassified	Dinophyceae_unclassified
OTU_9	0.00374554	0.00618283	0.000100569	0.000156188	0	0	0	0	0.000125841	0.00300956	0.000194959	0	0	0	5.29e-05	0	1.75e-05	0	0.00016301	0.00241773	1.83e-05	0	0	0	0	0	0	0	0	0	0	0	0	0	0	0	0	Eukaryota	Stramenopiles	Ochrophyta	Ochrophyta_unclassified	Ochrophyta_unclassified	Ochrophyta_unclassified	Ochrophyta_unclassified
OTU_1821	0.000928895	0.000921804	8.05e-05	0.000156188	0	0	0	0	0	9.71e-05	0.00286868	0.000484139	0	0	0	0	0	0	0	0	0.000164736	0.00037174	0.000209094	1.43e-05	0	0	0	0	0	0	0	0	0	0	0	0	0	Eukaryota	Rhizaria	Cercozoa	Filosa-Thecofilosea	Filosa-Thecofilosea_X	Mataza-lineage	Mataza-lineage_X_sp.
OTU_408	0	0	8.05e-05	0.000156188	8.99e-05	0.00128777	7.94e-05	0	0	0	0	2.31e-05	0	0	5.29e-05	0.000102509	0.000104778	0	0	0	0	0	0	0	0	0	0	0	0	0	0	0	0	0	0	0	0	Eukaryota	Alveolata	Ciliophora	Phyllopharyngea	Phyllopharyngea_unclassified	Phyllopharyngea_unclassified	Phyllopharyngea_unclassified
OTU_11005	0	0	8.05e-05	0.000156188	0	1.62e-05	0	0	0	0	0	0.000414976	9.97e-05	0.000123438	0	4.1e-05	0	3.54e-05	0	0	0	0	0.000321683	1.43e-05	0.00191364	0.00139545	0.00107477	0.000141383	0.000635935	0.000419287	0.000997617	0.000108389	0.000221131	0.000139545	0.000370758	5.11e-05	7.48e-05	Eukaryota	Alveolata	Ciliophora	Spirotrichea	Strombidiida	Strombidiidae_R	Strombidiidae_R_X_sp.
OTU_2208	0	0	8.05e-05	0.000156188	0.00128885	0.000761325	0.000158863	5.04e-05	0	0	0	0.000230542	8.54e-05	0.000216016	0	0.00125062	0.000663593	0.000725754	0	0	0	0	0	0	8.2e-05	0.00025219	0.000260024	0.000267056	0.000124085	0.000272537	0.000277116	0.0010297	0.000132679	0.00106403	0.000145079	0.000817898	0.000149603	Eukaryota	Alveolata	Dinoflagellata	Dinophyceae	Gymnodiniales	Gymnodiniaceae	Gymnodiniaceae_unclassified
OTU_919	0.00128847	0.000719457	8.05e-05	0.000156188	0	0	0	0	9.79e-05	0.00235425	0	4.61e-05	0	0	0	0	0	0	0	8.69e-05	0	0	0	0	0	0	0	0	0	0	0	0	0	0	0	0	0	Eukaryota	Alveolata	Perkinsea	Perkinsida	Perkinsida_X	Perkinsida_XX	Perkinsida_XXX_sp.
OTU_4173	0	0	6.03e-05	0.000156188	5.99e-05	0.000388762	9.93e-05	0	0	0	0	2.31e-05	0	0	0	0	0	3.54e-05	0	0	0	0	0	0	0	3.36e-05	5.2e-05	1.57e-05	1.55e-05	0	8.31e-05	5.42e-05	0	0.000139545	3.22e-05	8.52e-05	1.87e-05	Eukaryota	Opisthokonta	Choanoflagellida	Choanoflagellatea	Acanthoecida	Stephanoecidae_Group_D	Stephanoecidae_Group_D_X_sp.
OTU_2296	0	0	6.03e-05	0.000156188	0.00278752	0.0060987	0	0	0	0	0	0	0	0	0	0	0	0	0	0	0	0	0	0	0	0	0	0	0	0	0	0	0	0	0	0	0	Eukaryota	Alveolata	Ciliophora	CONTH_8	CONTH_8_X	CONTH_8_XX	CONTH_8_XXX_sp.
OTU_13892	0	0	6.03e-05	0.000156188	0.00017984	4.86e-05	0	0	0	0	0	0	5.7e-05	9.26e-05	0	0	0	0	0	0	0	0	0	0	0	1.68e-05	0	1.57e-05	0	8.39e-05	2.77e-05	0.000108389	0	1.74e-05	0	0	0	Eukaryota	Alveolata	Ciliophora	Spirotrichea	Spirotrichea_unclassified	Spirotrichea_unclassified	Spirotrichea_unclassified
OTU_727	0	0	6.03e-05	0.000156188	8.99e-05	8.91e-05	7.94e-05	0.000579258	0	0	0.00582092	0.000691627	7.12e-05	0.000154297	0	8.2e-05	3.49e-05	0.000230117	0	0	9.15e-05	0.000136957	0.000337767	5.73e-05	2.73e-05	3.36e-05	0.000225354	3.14e-05	0.000139595	2.1e-05	0	1.81e-05	0	0.000401193	1.61e-05	3.41e-05	3.74e-05	Eukaryota	Alveolata	Ciliophora	Litostomatea	Haptoria_4	Didiniidae	Didiniidae_X_sp.
OTU_233	0.00257693	0.00274293	6.03e-05	0.000156188	0	0	0	2.52e-05	2.8e-05	0.000145624	0	0	0	0	0	0	0	0	0	8.69e-05	0.00128128	5.87e-05	0	0	0	0	0	0	0	0	0	0	0	0	0	0	0	Eukaryota	Hacrobia	Cryptophyta	Cryptophyceae	Cryptophyceae_X	Cryptomonadales	Cryptomonas_tetrapyrenoidosa
OTU_19270	0	0	6.03e-05	0.000156188	0.000149867	0.000145786	0	2.52e-05	0	0	0	0	0	3.09e-05	0	0	0	0	0	0	0	0	0	0	0	3.36e-05	0	0	3.1e-05	2.1e-05	8.31e-05	1.81e-05	2.21e-05	0.000104659	0	1.7e-05	0	Eukaryota	Alveolata	Dinoflagellata	Dinophyceae	Dinophyceae_unclassified	Dinophyceae_unclassified	Dinophyceae_unclassified
OTU_23032	0	0	6.03e-05	0.000156188	5.99e-05	3.24e-05	5.96e-05	5.04e-05	0	0	0	2.31e-05	0	0	0	0	0	0	0	0	0	0	0	0	0	3.36e-05	0	3.14e-05	1.55e-05	4.19e-05	0	0.000252908	0	6.98e-05	1.61e-05	5.11e-05	0	Eukaryota	Alveolata	Dinoflagellata	Dinophyceae	Gymnodiniales	Gymnodiniaceae	Gyrodinium_unclassified
OTU_716	0	0	4.02e-05	0.000156188	5.99e-05	5.67e-05	3.97e-05	5.04e-05	0	0	0.000724133	0.000576356	0.000213623	0.000432032	0.000246653	0.00139413	0.0014145	0.00081426	0	0	0	0	0	0	4.1e-05	5.04e-05	0.00010401	9.43e-05	0.000155106	0.00113207	0.000360251	0.000614206	0.000199018	0.000296534	9.67e-05	0.000562305	0.000205704	Eukaryota	Rhizaria	Cercozoa	Filosa-Thecofilosea	Cryomonadida	Protaspa-lineage	Protaspa-lineage_X_sp.
OTU_1510	0.00173793	0.00406943	4.02e-05	0.000156188	0	0	0	0	0	0.000582496	0.00236736	0.000507193	2.85e-05	1.54e-05	3.52e-05	0	6.99e-05	0	0	0.000173729	0	0	0	1.43e-05	0	0	0	0	0	0	0	0	0	0	0	0	0	Eukaryota	Rhizaria	Cercozoa	Novel-clade-10-12	Novel-clade-10	Novel-clade-10_X	Novel-clade-10_XX_sp.
OTU_511	0	0	4.02e-05	0.000156188	0.000149867	0.000283472	0.00244251	0.00178814	0	0	0	0.000253596	7.12e-05	0.000169727	0	0.000123011	0	3.54e-05	0	0	0	0	1.61e-05	0	0	1.68e-05	0.000416038	0.000141383	0.000403276	2.1e-05	0.000443385	0.000578076	4.42e-05	0.00188386	0.000402998	0.000954215	0.000635811	Eukaryota	Alveolata	Ciliophora	Spirotrichea	Strombidiida	Strombidiidae_M	Strombidiidae_M_X_sp.
OTU_1169	0	0	4.02e-05	0.000156188	0.000599466	0.00120678	0.00442829	0.00161185	0	0	0.000111405	0.000115271	0.000199382	0.000370313	5.29e-05	0.000922585	0.000925538	7.08e-05	0	0	0	0	3.22e-05	0	0	5.04e-05	0.000190684	6.28e-05	6.2e-05	0.000146751	8.31e-05	5.42e-05	0.000331697	0.000348864	0.000193439	0.000408949	0.000411407	Eukaryota	Alveolata	Dinoflagellata	Dinophyceae	Dinophyceae_unclassified	Dinophyceae_unclassified	Dinophyceae_unclassified
OTU_3705	0	0	4.02e-05	0.000156188	0.000239787	0.000145786	0.000198578	0.000226666	0	0	0	4.61e-05	0	9.26e-05	0	0.000184517	0.00017463	0.000106208	0	0	0	0	0	0	1.37e-05	8.41e-05	1.73e-05	6.28e-05	7.76e-05	4.19e-05	0	0.000108389	0.000110566	0.000156989	0.000161199	0.000221514	5.61e-05	Eukaryota	Alveolata	Dinoflagellata	Dinophyceae	Dinophyceae_unclassified	Dinophyceae_unclassified	Dinophyceae_unclassified
OTU_16300	0.000329608	0.000337245	4.02e-05	0.000156188	0	0	0	0	0	7.28e-05	0	2.31e-05	0	0	0	0	0	0	0	0	0	0	0	0	0	0	0	0	0	0	0	0	0	0	0	0	0	Eukaryota	Stramenopiles	Ochrophyta	Chrysophyceae	Chrysophyceae_X	Chrysophyceae_X_unclassified	Chrysophyceae_X_unclassified
OTU_1555	0	0	2.01e-05	0.000156188	0.000209813	0.00030777	0.00287938	0.00193925	0	0	0	0.000553301	0	0.000154297	0	0.000123011	0	5.31e-05	0	0	0	0	0	0	0	5.04e-05	0.000156014	7.85e-05	0.000403276	2.1e-05	0.000166269	0.000722596	6.63e-05	0.00191875	0.000483598	0.00120981	0.00110332	Eukaryota	Alveolata	Ciliophora	Spirotrichea	Strombidiida	Strombidiidae_M	Strombidiidae_M_unclassified
OTU_2453	0.00278668	0.00433922	2.01e-05	0.000156188	0	0	0	0	5.59e-05	0.000169895	0	0	0	0	0	0	0	0	0.00606397	0.00346011	0.000402687	0.000293479	0	8.59e-05	0	0	3.47e-05	0	0	0	0	0	0	0	0	0	0	Eukaryota	Alveolata	Ciliophora	Spirotrichea	Choreotrichida	Strobilidiidae_B	Strobilidiidae_B_X_sp.
OTU_2534	0.000539358	0.000157381	0	0.000156188	0	0	0	0	1.4e-05	7.28e-05	0	0	0	0	0	0	0	0	0	1.45e-05	0	0	0	0	0	0	0	0	0	0	0	0	0	0	0	0	0	Eukaryota	Stramenopiles	Ochrophyta	Ochrophyta_unclassified	Ochrophyta_unclassified	Ochrophyta_unclassified	Ochrophyta_unclassified
OTU_2475	0	0	0.00078444	0.000138833	3e-05	0.000461654	0	0	0	0	0	0	2.85e-05	0	0	2.05e-05	1.75e-05	0	0	0	0	0	0	0	0	0	0	0	0	0	0	0	0	3.49e-05	0	0	0	Eukaryota	Stramenopiles	Ochrophyta	Bacillariophyta	Bacillariophyta_X	Polar-centric-Mediophyceae	Chaetoceros_decipiens
OTU_3380	0	0	0.000341935	0.000138833	0.00026976	0.000242976	0	0	0	0	0	2.31e-05	2.85e-05	7.71e-05	0	6.15e-05	0	0	0	0	0	0	0	0	0	0	0	0	0	4.19e-05	0	7.23e-05	0	0.000209318	0	0.000119277	0	Eukaryota	Alveolata	Ciliophora	Spirotrichea	Strombidiida_G	Strombidiida_G_X	Strombidium_G_X_sp.
OTU_3709	3e-05	2.25e-05	0.000321822	0.000138833	8.99e-05	7.29e-05	0.000655308	0.000906664	1.4e-05	0	2.79e-05	0.00016138	0.000284831	0.000231446	1.76e-05	2.05e-05	0.000192093	5.31e-05	0	0	0	0	8.04e-05	2.86e-05	2.73e-05	6.73e-05	0.000173349	1.57e-05	0.000155106	0.000146751	8.31e-05	3.61e-05	0.000132679	5.23e-05	0.000322399	0.000272633	0.000542309	Eukaryota	Alveolata	Dinoflagellata	Dinophyceae	Dinophyceae_unclassified	Dinophyceae_unclassified	Dinophyceae_unclassified
OTU_375	0.00509394	0.00413688	0.000301708	0.000138833	3e-05	0	0	0	1.4e-05	0.000995097	0.000501323	0.000115271	0	0	1.76e-05	0	1.75e-05	0	0	2.9e-05	0.000128128	3.91e-05	0	0	0	0	0	0	0	0	0	0	0	0	0	0	0	Eukaryota	Hacrobia	Cryptophyta	Cryptophyceae	Cryptophyceae_X	Basal_Cryptophyceae-1	Basal_Cryptophyceae-1_X_sp.
OTU_3834	0	0	0.000281594	0.000138833	3e-05	4.05e-05	0	0	0	0	0	4.61e-05	0	0	3.52e-05	0	0	5.31e-05	0	0	0	0	0	1.43e-05	0.000273377	0.000453942	0.000433373	0.00039273	0.000294702	0.000377358	0.000110846	1.81e-05	4.42e-05	0.000104659	0.000177319	5.11e-05	0	Eukaryota	Alveolata	Ciliophora	Spirotrichea	Strombidiida	Strombidiidae_R	Strombidium_R_unclassified
OTU_4262	0	0	0.00026148	0.000138833	0.000479573	0.000145786	3.97e-05	2.52e-05	0	0	0	0	4.27e-05	1.54e-05	0	2.05e-05	0	0	0	0	0	0	0	0	0	0	0	0	0	0	0	0	0	0	1.61e-05	0	0	Eukaryota	Hacrobia	Cryptophyta	Cryptophyceae	Cryptophyceae_X	Cryptomonadales	Cryptomonadales_unclassified
OTU_1392	0	0	0.000221252	0.000138833	0.00131883	0.000769424	0.000655308	0.000478517	0	0	0	4.61e-05	8.54e-05	0.000169727	3.52e-05	0.000307528	0.000436574	0.000601844	0	0	0	0	0	0	6.83e-05	0.000100876	0.000329364	0.000141383	0.000124085	0.000293501	0.000221693	0.000722596	0.000132679	0.000627954	6.45e-05	0.000715661	7.48e-05	Eukaryota	Alveolata	Dinoflagellata	Dinophyceae	Gymnodiniales	Gymnodiniaceae	Gyrodinium_helveticum
OTU_13914	0	0	0.000201138	0.000138833	0.000329707	0.000145786	0	5.04e-05	0	2.43e-05	0	2.31e-05	0.00018514	0.00243789	0	0.0010661	0.000192093	3.54e-05	0	0	0	0	0	0	0	0	0	0	0	0	0	0	0	1.74e-05	3.22e-05	0	3.74e-05	Eukaryota	Alveolata	Ciliophora	Spirotrichea	Strombidiida	Tontoniidae_B	Tontoniidae_B_X_sp.
OTU_5836	0	0	0.000181025	0.000138833	0.000389653	0.00030777	0.000218436	0.000201481	0	2.43e-05	0	6.92e-05	5.7e-05	0.000216016	3.52e-05	0.000246023	6.99e-05	7.08e-05	0	0	0	0	0	0	1.37e-05	3.36e-05	5.2e-05	0	4.65e-05	8.39e-05	5.54e-05	0.000126454	0.000110566	6.98e-05	0.000128959	0.000204475	0.000112202	Eukaryota	Alveolata	Dinoflagellata	Dinophyceae	Dinophyceae_unclassified	Dinophyceae_unclassified	Dinophyceae_unclassified
OTU_2432	0	0	0.000181025	0.000138833	8.99e-05	8.91e-05	0.000198578	0	0	0	0	4.61e-05	0.000142416	0.000108008	0	6.15e-05	1.75e-05	0.000194714	0	0	0	0	0	0	1.37e-05	5.04e-05	0.00010401	3.14e-05	0.000108574	6.29e-05	5.54e-05	0.000180649	0.000265358	6.98e-05	0.000177319	6.82e-05	0.000187003	Eukaryota	Alveolata	Dinoflagellata	Dinophyceae	Dinophyceae_unclassified	Dinophyceae_unclassified	Dinophyceae_unclassified
OTU_15745	0	0	0.000160911	0.000138833	0.000659413	0.000396861	0.0016482	0.00196444	0	0	8.36e-05	6.92e-05	0.000512696	0.00112637	3.52e-05	0.000266525	0.000122241	0.000300922	0	0	0	0	0	0	1.37e-05	0.000100876	0.000606722	0.000157092	0.000201638	8.39e-05	0.000332539	0.000270973	0.000751846	0.000418636	0.00143467	0.000988294	0.00319776	Eukaryota	Alveolata	Dinoflagellata	Dinophyceae	Dinophyceae_unclassified	Dinophyceae_unclassified	Dinophyceae_unclassified
OTU_15017	0.000119857	2.25e-05	0.000160911	0.000138833	0	0	0	0	2.8e-05	0.000169895	5.57e-05	0	0	0	0	0	0	0	0	1.45e-05	0	0	0	0	0	0	0	0	0	0	0	0	0	0	0	0	0	Eukaryota	Stramenopiles	Ochrophyta	Chrysophyceae	Chrysophyceae_X	Chrysophyceae_Clade-C	Chrysophyceae_Clade-C_unclassified
OTU_806	0	0	0.000140797	0.000138833	0.00200821	0.00279422	0.000238294	5.04e-05	0	0	0	0	0	6.17e-05	3.52e-05	0.000246023	5.24e-05	1.77e-05	0	0	0	0	0	0	1.37e-05	0	0.00010401	3.14e-05	0.00024817	0.000125786	0.000249404	0.000469687	0.000132679	0.000470966	0.00011284	0.000340791	0.000355306	Eukaryota	Opisthokonta	Choanoflagellida	Choanoflagellatea	Acanthoecida	Stephanoecidae_Group_D	Stephanoecidae_Group_D_unclassified
OTU_8920	0	0	0.000140797	0.000138833	0	0	0	0	0	0	0	4.61e-05	1.42e-05	4.63e-05	0	2.05e-05	0	0	0	0	0	0	0	0	0	1.68e-05	0	1.57e-05	0	2.1e-05	0	3.61e-05	0	0.000104659	0	1.7e-05	0	Eukaryota	Alveolata	Ciliophora	Spirotrichea	Strombidiida	Tontoniidae_A	Tontoniidae_A_unclassified
OTU_21101	0	0	0.000140797	0.000138833	8.99e-05	0.000121488	0.000158863	0.000226666	0	0	0	0	1.42e-05	6.17e-05	1.76e-05	6.15e-05	0.000122241	1.77e-05	0	0	1.83e-05	0	0	0	1.37e-05	5.04e-05	1.73e-05	3.14e-05	3.1e-05	0.000146751	0	0.000144519	8.85e-05	0.000296534	1.61e-05	0.000221514	0.000130902	Eukaryota	Alveolata	Dinoflagellata	Dinophyceae	Gymnodiniales	Gymnodiniaceae	Gyrodinium_helveticum
OTU_2644	0	0	0.000140797	0.000138833	0	1.62e-05	0	0	0	0	0	0	2.85e-05	0.000108008	0	6.15e-05	0	0	0	0	0	0	0	0	0	0	0.000121344	4.71e-05	3.1e-05	2.1e-05	2.77e-05	3.61e-05	0	6.98e-05	0	0	0	Eukaryota	Alveolata	Dinoflagellata	Dinophyceae	Suessiales	Suessiaceae	Ansanella_granifera
OTU_13976	0	0	0.000120683	0.000138833	8.99e-05	0	0	0	0	0	0	0	0	0	0	0	0	0	0	0	0	0	0	0	0	0	0	0	0	0	0	5.42e-05	0	0	0	0	0	Eukaryota	Alveolata	Ciliophora	Spirotrichea	Spirotrichea_unclassified	Spirotrichea_unclassified	Spirotrichea_unclassified
OTU_13080	0	0	0.000120683	0.000138833	3e-05	8.1e-06	1.99e-05	2.52e-05	0	0	0	2.31e-05	0	1.54e-05	0	4.1e-05	0	0	0	0	0	0	0	0	0	1.68e-05	1.73e-05	0	0	0	0	1.81e-05	2.21e-05	5.23e-05	3.22e-05	3.41e-05	1.87e-05	Eukaryota	Alveolata	Ciliophora	Ciliophora_X	Ciliophora_XX	Ciliophora_XXX	Mesodinium_rubrum
OTU_325	0	0	0.000120683	0.000138833	0.00053952	0.000575043	0.0128877	0.00957034	0	2.43e-05	0.000612728	0.00809203	0.000939943	0.00378028	0.000458069	0.00410038	0.00193839	0.0151523	0	0	0	0	3.22e-05	4.3e-05	0.000546754	0.00685956	0.0319483	0.00241922	0.0119587	0.00081761	0.0268525	0.00130067	0.0452877	0.00425614	0.0457645	0.00708845	0.0471622	Eukaryota	Alveolata	Dinoflagellata	Dinophyceae	Dinophyceae_unclassified	Dinophyceae_unclassified	Dinophyceae_unclassified
OTU_22426	0	0	0.000100569	0.000138833	0.00098912	0.000834217	0.000397156	0.000151111	0	0	2.79e-05	0.000184434	0.00207927	0.001975	0.00110994	0.000410038	0.000454037	0.000548741	0	0	1.83e-05	0	0	0	0.00012302	0.000100876	0.000190684	0.000267056	0.000449808	0.000104822	0.000332539	0.000234844	4.42e-05	0.00033142	0.000145079	0.000170395	0.000355306	Eukaryota	Alveolata	Dinoflagellata	Dinophyceae	Gymnodiniales	Gymnodiniaceae	Gyrodinium_unclassified
OTU_22547	0	0	0.000100569	0.000138833	0.000389653	0.000348266	0.000139005	0.00010074	0	0	0	2.31e-05	7.12e-05	4.63e-05	0	4.1e-05	6.99e-05	0	0	0	0	0	0	0	1.37e-05	3.36e-05	0	0	1.55e-05	2.1e-05	0	0.000108389	2.21e-05	5.23e-05	3.22e-05	8.52e-05	1.87e-05	Eukaryota	Alveolata	Dinoflagellata	Dinophyceae	Gymnodiniales	Gymnodiniaceae	Gyrodinium_helveticum
OTU_243	0.000958859	0.00107919	0.000100569	0.000138833	0	0	0	0	0.000237699	0.000995097	0.000529174	2.31e-05	0	1.54e-05	3.52e-05	0	0	0	0	0.000448801	3.66e-05	0	0	0	0	0	0	0	0	0	0	0	0	0	0	0	0	Eukaryota	Stramenopiles	Ochrophyta	Chrysophyceae	Chrysophyceae_X	Chrysophyceae_Clade-C	Chrysophyceae_Clade-C_unclassified
OTU_1104	0	0	0.000100569	0.000138833	0	0	0	0	0	0	0	0	0.000356039	0.000138867	7.05e-05	0	0	0	0	0	0	0	0	2.86e-05	2.73e-05	3.36e-05	1.73e-05	0	1.55e-05	0	0	0	0	0	0	1.7e-05	0	Eukaryota	Stramenopiles	Ochrophyta	Bacillariophyta	Bacillariophyta_X	Araphid-pennate	Licmophora_juergensii
OTU_966	0.000779073	0.00051711	0.000100569	0.000138833	0	0	0	0	0	0	0	0	0	0	0	0	0	0	0	0	0	0	0	0	0	0	0	0	0	0	0	0	0	0	0	0	0	Eukaryota	Stramenopiles	Ochrophyta	Chrysophyceae	Chrysophyceae_X	Chrysophyceae_Clade-E	Chrysophyceae_Clade-E_unclassified
OTU_1570	0	0	8.05e-05	0.000138833	0.000299733	8.91e-05	0.000238294	0.000125926	1.4e-05	0	5.57e-05	0.000645518	0.00113933	0.00134238	1.76e-05	0.000861079	0.000366723	0.00120369	0	0	0	1.96e-05	1.61e-05	0	0.000300715	0.000353066	0.00116144	0.00097397	0.000496339	0.00115304	0.00116389	0.00254715	0.00192384	0.000819829	0.00112839	0.00076678	0.00115942	Eukaryota	Hacrobia	Cryptophyta	Cryptophyceae	Cryptophyceae_X	Cryptomonadales	Teleaulax_gracilis
OTU_23042	0	0	8.05e-05	0.000138833	0.000299733	0.000591242	0.00206521	0.000705183	0	0	8.36e-05	0.000138325	9.97e-05	0.000154297	0.000105708	0.000533049	0.000436574	1.77e-05	0	0	0	0	0	1.43e-05	4.1e-05	5.04e-05	8.67e-05	0	3.1e-05	4.19e-05	0	9.03e-05	0.000132679	0.000191875	6.45e-05	0.000153356	9.35e-05	Eukaryota	Alveolata	Dinoflagellata	Dinophyceae	Dinophyceae_unclassified	Dinophyceae_unclassified	Dinophyceae_unclassified
OTU_22990	0	0	8.05e-05	0.000138833	0.000119893	4.05e-05	0	5.04e-05	0	0	0	0.000138325	0	7.71e-05	0	0.000123011	0.000122241	0.000106208	0	0	0	1.96e-05	0	0	0.000464741	0.000353066	0.000277359	0.000125674	1.55e-05	0.000209644	8.31e-05	0.000415492	2.21e-05	0.000104659	9.67e-05	0.000119277	0	Eukaryota	Alveolata	Dinoflagellata	Dinophyceae	Gymnodiniales	Gymnodiniaceae	Gymnodiniaceae_unclassified
OTU_2053	0	0	8.05e-05	0.000138833	0.000119893	8.1e-06	0	0	0	0	0	0	5.7e-05	0.000154297	0	0	0	0	0	0	0	0	0	0	0	0	0	0	0	0	0	0	0	0	0	0	0	Eukaryota	Alveolata	Dinoflagellata	Syndiniales	Dino-Group-II	Dino-Group-II-Clade-38	Dino-Group-II-Clade-38_X_sp.
OTU_686	0.000179786	0.0010567	6.03e-05	0.000138833	0	0	0	0	1.4e-05	9.71e-05	0	0	0	0	0	0	0	0	0	0	3.66e-05	7.83e-05	0	0	0	0	0	0	0	0	0	0	0	0	0	0	0	Eukaryota	Opisthokonta	Choanoflagellida	Choanoflagellatea	Choanoflagellatea_X	Choanoflagellatea_X_Group_L	Choanoflagellatea_X_Group_L_X_sp.
OTU_3323	0	0	6.03e-05	0.000138833	0.00101909	0.00175753	0.000139005	0.00010074	0	0	0	0.000138325	2.85e-05	7.71e-05	3.52e-05	0.00125062	3.49e-05	0	0	0	0	0	0	0	4.1e-05	0.000134501	8.67e-05	1.57e-05	0.00024817	2.1e-05	0.000249404	5.42e-05	0.000199018	0.000313977	0.000193439	0.000204475	0.000710612	Eukaryota	Alveolata	Dinoflagellata	Dinophyceae	Dinophyceae_unclassified	Dinophyceae_unclassified	Dinophyceae_unclassified
OTU_3175	0	0	6.03e-05	0.000138833	0.000599466	0.000283472	1.99e-05	0	0	0	2.79e-05	2.31e-05	0.000113933	0.000200586	1.76e-05	6.15e-05	6.99e-05	8.85e-05	0	0	0	0	0	0	1.37e-05	0	0	1.57e-05	3.1e-05	8.39e-05	0.000110846	0.000126454	0.000221131	6.98e-05	6.45e-05	6.82e-05	7.48e-05	Eukaryota	Alveolata	Dinoflagellata	Dinophyceae	Dinophyceae_unclassified	Dinophyceae_unclassified	Dinophyceae_unclassified
OTU_1676	0	0	6.03e-05	0.000138833	0.00053952	0.000558845	0.000476588	0.000327406	0	0	0	2.31e-05	0.00018514	0.000216016	8.81e-05	0.000389536	0.000104778	0.00026552	0	0	0	0	0	0	0	1.68e-05	0.000242689	3.14e-05	6.2e-05	6.29e-05	0.000221693	0.000180649	0.000420149	0.000122102	0.000145079	0.000255593	0.000411407	Eukaryota	Alveolata	Dinoflagellata	Dinophyceae	Dinophyceae_unclassified	Dinophyceae_unclassified	Dinophyceae_unclassified
OTU_22266	0	0	6.03e-05	0.000138833	8.99e-05	9.72e-05	0.000575877	0.000402962	0	0	2.79e-05	0.000391922	0.000142416	0.000231446	0.000158562	0.00032803	0.000523889	5.31e-05	0	0	0	0	0	0	0	1.68e-05	3.47e-05	1.57e-05	0	2.1e-05	0	1.81e-05	0	1.74e-05	6.45e-05	3.41e-05	9.35e-05	Eukaryota	Alveolata	Dinoflagellata	Dinophyceae	Dinophyceae_unclassified	Dinophyceae_unclassified	Dinophyceae_unclassified
OTU_271	0	0	4.02e-05	0.000138833	8.99e-05	0.000283472	0.00297867	0.00289629	0	0	0	0.000230542	2.85e-05	0.000138867	0	0.000123011	0	7.08e-05	0	0	0	0	0	0	0	5.04e-05	0.000381368	0.000109964	0.000434297	4.19e-05	0.000360251	0.00074066	2.21e-05	0.00197108	0.000322399	0.00124389	0.000841515	Eukaryota	Alveolata	Ciliophora	Spirotrichea	Strombidiida	Strombidiidae_M	Strombidiidae_M_unclassified
OTU_1069	0	0	4.02e-05	0.000138833	0	8.1e-06	0.000158863	0.000478517	0	0	0.000139256	0.000115271	2.85e-05	3.09e-05	0	0	0	1.77e-05	0	0	3.66e-05	0	8.04e-05	2.86e-05	0	0	8.67e-05	4.71e-05	1.55e-05	2.1e-05	0	0.000144519	4.42e-05	0.000209318	6.45e-05	3.41e-05	1.87e-05	Eukaryota	Alveolata	Ciliophora	Litostomatea	Haptoria_4	Didiniidae	Didiniidae_X_sp.
OTU_9184	0	0	4.02e-05	0.000138833	0.000149867	7.29e-05	0.000377299	5.04e-05	0	0	0.00022281	0.00142936	0.0036316	0.00266934	0.000123326	0.000943087	0.000733445	0.00431912	0	2.9e-05	0	0.000156522	0.000627282	0.000315006	0.0008338	0.000958321	0.00152547	0.0020422	0.00130289	0.00312369	0.00169041	0.00238456	0.00243244	0.000645398	0.00183767	0.000988294	0.00132772	Eukaryota	Hacrobia	Cryptophyta	Cryptophyceae	Cryptophyceae_X	Cryptomonadales	Teleaulax_gracilis
OTU_6663	0	0	4.02e-05	0.000138833	0.000779306	0.000882813	0.000158863	0.000125926	0	0	0	4.61e-05	5.7e-05	4.63e-05	1.76e-05	0.000492045	1.75e-05	0.00014161	0	0	0	0	0	0	0	0.000100876	3.47e-05	7.85e-05	9.31e-05	8.39e-05	8.31e-05	9.03e-05	6.63e-05	0.000261648	0.000145079	0.000238554	0.000355306	Eukaryota	Alveolata	Dinoflagellata	Dinophyceae	Dinophyceae_unclassified	Dinophyceae_unclassified	Dinophyceae_unclassified
OTU_2631	0	0	4.02e-05	0.000138833	0.00110901	0.000939507	1.99e-05	5.04e-05	0	0	0.000557025	0.00059941	0.00260621	0.00242247	0.00375264	0.00426439	0.00426097	0.000654948	0	0	0	0	0	0	5.47e-05	1.68e-05	0.000329364	7.85e-05	0.000124085	0.000461216	0.000304827	0.000343233	0.000884525	0.000540739	0.000515838	0.000920136	0.000205704	Eukaryota	Hacrobia	Haptophyta	Prymnesiophyceae	Prymnesiales	Chrysochromulinaceae	Chrysochromulina_unclassified
OTU_231	0.00338597	0.00339494	4.02e-05	0.000138833	0	0	0	0	0.00176177	0.0040532	0.000668431	0.00016138	0	0	0	0	0	0	0	0.00215714	0.000292863	0	0	0	0	0	0	0	0	0	0	0	0	0	0	0	0	Eukaryota	Stramenopiles	Ochrophyta	Chrysophyceae	Chrysophyceae_X	Chrysophyceae_X_unclassified	Chrysophyceae_X_unclassified
OTU_2249	0.00254697	0.00319259	4.02e-05	0.000138833	0	8.1e-06	0	0	0	0	2.79e-05	0	0	0	1.76e-05	6.15e-05	3.49e-05	0	0	1.45e-05	9.15e-05	9.78e-05	0	0	0	0	0	0	1.55e-05	2.1e-05	0	0	0	0	0	0	0	Eukaryota	Hacrobia	Telonemia	Telonemia_X	Telonemia_XX	Telonemia-Group-2	Telonemia-Group-2_X_sp.
OTU_5979	0	0	2.01e-05	0.000138833	3e-05	8.91e-05	0	0	0	0	0	0	2.85e-05	0	0	0	0	0	0	0	0	0	0	0	0	0	1.73e-05	1.57e-05	0	0.000146751	2.77e-05	0.000216779	2.21e-05	0.000366307	0	3.41e-05	0	Eukaryota	Alveolata	Ciliophora	Spirotrichea	Spirotrichea_unclassified	Spirotrichea_unclassified	Spirotrichea_unclassified
OTU_614	0.00779073	0.00157381	2.01e-05	0.000138833	0	0	0	0	0.000265664	7.28e-05	0	0	0	0	0	0	0	0	0.0256251	0.00130297	0	0	0	0	0	0	0	0	0	0	0	0	0	0	0	0	0	Eukaryota	Alveolata	Ciliophora	Spirotrichea	Tintinnida	TIN_03	Tintinnopsis_03_unclassified
OTU_12221	0	0	2.01e-05	0.000138833	0	0	0	0	0	0	0	0	0	0	1.76e-05	0	0	0	0	0	0	0	0	0	4.1e-05	3.36e-05	0	4.71e-05	0	0	0	1.81e-05	0	0	1.61e-05	1.7e-05	0	Eukaryota	Alveolata	Ciliophora	Spirotrichea	Strombidiida	Strombidiida_unclassified	Strombidiida_unclassified
OTU_2110	5.99e-05	4.5e-05	2.01e-05	0.000138833	0	0	0	0	0.000503363	0.000509684	8.36e-05	2.31e-05	0	0	0	0	0	0	0	0	5.49e-05	0	0	0	0	0	0	0	0	0	0	0	0	0	0	0	0	Eukaryota	Hacrobia	Cryptophyta	Cryptophyceae	Cryptophyceae_X	Cryptomonadales	Cryptomonas_unclassified
OTU_6583	0	0	2.01e-05	0.000138833	0.000689386	0.0010286	0.000158863	2.52e-05	0	0	0	0.000138325	1.42e-05	0.000123438	0	0.00118911	0	0.000212416	0	0	0	0	0	0	0	0.000184939	0.000138679	3.14e-05	0.000170617	8.39e-05	0.000332539	0.000126454	2.21e-05	0.000627954	0.000128959	0.000357831	0.000317906	Eukaryota	Alveolata	Dinoflagellata	Dinophyceae	Dinophyceae_unclassified	Dinophyceae_unclassified	Dinophyceae_unclassified
OTU_21601	0	0	2.01e-05	0.000138833	0.000479573	0.000737027	0	0.000125926	0	0	2.79e-05	6.92e-05	1.42e-05	4.63e-05	0	0.000697064	0	0.000177013	0	0	0	0	0	0	0	0.000117689	0.00010401	0	0.000279191	0	0.000221693	7.23e-05	4.42e-05	0.00033142	6.45e-05	0.000119277	0.000243104	Eukaryota	Alveolata	Dinoflagellata	Dinophyceae	Dinophyceae_unclassified	Dinophyceae_unclassified	Dinophyceae_unclassified
OTU_6818	0	0	2.01e-05	0.000138833	5.99e-05	0.000113389	1.99e-05	0	0	0	0	9.22e-05	0	0	0	8.2e-05	0	1.77e-05	0	0	0	0	0	0	0	8.41e-05	3.47e-05	1.57e-05	3.1e-05	0	5.54e-05	3.61e-05	2.21e-05	8.72e-05	3.22e-05	3.41e-05	5.61e-05	Eukaryota	Alveolata	Dinoflagellata	Dinophyceae	Dinophyceae_unclassified	Dinophyceae_unclassified	Dinophyceae_unclassified
OTU_21492	0.00197765	0.0013265	2.01e-05	0.000138833	0	0	0	0	0.00158	0.00201447	0.00169893	0.000507193	4.27e-05	3.09e-05	8.81e-05	0	0	0	0.000391224	0.000941033	0.000164736	5.87e-05	0	0	0	0	1.73e-05	0	0	0	0	0	0	0	0	0	0	Eukaryota	Alveolata	Dinoflagellata	Dinophyceae	Suessiales	Suessiaceae	Asulcocephalium_miricentonis
OTU_1058	0.000509394	0.000337245	2.01e-05	0.000138833	0	0	0	0	8.39e-05	0.00232998	0.000250661	0.000115271	1.42e-05	0	1.76e-05	0	1.75e-05	0	0.000358622	0.000115819	7.32e-05	7.83e-05	0	0	0	0	0	0	0	0	0	0	0	0	0	0	0	Eukaryota	Stramenopiles	Ochrophyta	Synurophyceae	Synurales	Synurales_X	Synurales_XX_sp.
OTU_447	0.000839002	0.00096677	2.01e-05	0.000138833	0	0	0	0	1.4e-05	4.85e-05	0	0	0	0	0	0	0	0	0	1.45e-05	0	0	0	0	0	0	0	0	0	0	0	0	0	0	0	0	0	Eukaryota	Stramenopiles	Ochrophyta	Chrysophyceae	Chrysophyceae_X	Chrysophyceae_Clade-B1	Chrysophyceae_Clade-B1_X_sp.
OTU_393	0	8.99e-05	2.01e-05	0.000138833	0.000599466	0.000728928	0.00170777	0.0033748	0	0	0.000974795	0.00142936	0.00291952	0.00202129	0.00398168	0.00174266	0.00515158	0.00194714	0	0	0	0	0	0	5.47e-05	1.68e-05	0.000329364	7.85e-05	7.76e-05	0.000209644	0.000471097	0.000108389	0.00179116	0.000558182	0.00140243	0.000800859	0.00213184	Eukaryota	Hacrobia	Picozoa	Picozoa_X	Picozoa_XX	Picozoa_XXX	Picozoa_XXXX_sp.
OTU_22088	0	0	0	0.000138833	0.00080928	0.00166034	0.000317725	0.000176296	0	0	5.57e-05	0.00087606	5.7e-05	0.000354884	0	0.00371084	0	0.000566442	0	0	0	0	0	0	2.73e-05	0.000487567	0.000242689	0.000109964	0.000884105	4.19e-05	0.00127473	0.000270973	0.000176905	0.00071517	0.000225679	0.000579345	0.00119682	Eukaryota	Alveolata	Dinoflagellata	Dinophyceae	Dinophyceae_unclassified	Dinophyceae_unclassified	Dinophyceae_unclassified
OTU_2156	0.0026069	0.00303521	0	0.000138833	0	0	0	0	0	0	0	0	1.42e-05	0	0	0	0	0	0	0	0	0	0	0	0	0	0	0	0	0	0	0	0	0	0	0	0	Eukaryota	Stramenopiles	Ochrophyta	Ochrophyta_unclassified	Ochrophyta_unclassified	Ochrophyta_unclassified	Ochrophyta_unclassified
OTU_23284	0	0	0.000502846	0.000121479	0.00149867	0.00156314	0.000397156	0.000478517	0	0	5.57e-05	0.000461084	0.00435792	0.00461349	0.00220226	0.0011071	0.000558815	0.000938169	0	0	0	0	0	0	0.000369059	0.000403504	0.000364033	0.000424148	0.000558382	0.000314465	0.00088677	0.000650336	0.000221131	0.000488409	0.000241799	0.000289672	0.000280505	Eukaryota	Alveolata	Dinoflagellata	Dinophyceae	Gymnodiniales	Gymnodiniaceae	Gyrodinium_dominans
OTU_8066	0	0	0.000422391	0.000121479	0.000149867	5.67e-05	0	0	0	0	0	0	1.42e-05	1.54e-05	0	6.15e-05	0	1.77e-05	3.26e-05	0	0	0	0	0	0	1.68e-05	0	0	3.1e-05	6.29e-05	0	0	0	1.74e-05	0	0	1.87e-05	Eukaryota	Alveolata	Dinoflagellata	Dinophyceae	Gymnodiniales	Gymnodiniales_unclassified	Gymnodiniales_unclassified
OTU_5538	0	0	0.000402277	0.000121479	0	0	0	0	0	0	0	6.92e-05	0	0	0	0	0	1.77e-05	0	0	0	0	0	0	1.37e-05	1.68e-05	0.000138679	0.000219929	9.31e-05	4.19e-05	0.000360251	0	0	0	0	0	0	Eukaryota	Alveolata	Ciliophora	Spirotrichea	Strombidiida	Strombidiidae_R	Strombidium_biarmatum
OTU_6449	0	0	0.000362049	0.000121479	0	0	0	0	0	0	0	0	1.42e-05	4.63e-05	0	2.05e-05	1.75e-05	1.77e-05	0	0	0	0	0	0	0	0	0	0	0	0	2.77e-05	0	0	0	0	1.7e-05	0	Eukaryota	Alveolata	Ciliophora	Spirotrichea	Strombidiida	Tontoniidae_A	Laboea_strobila
OTU_5341	0	0	0.000301708	0.000121479	5.99e-05	8.1e-06	0	0	0	0	2.79e-05	2.31e-05	7.12e-05	4.63e-05	0	2.05e-05	0	0	0	0	0	0	0	0	0	0	0	0	0	0	0	3.61e-05	0	3.49e-05	0	0	0	Eukaryota	Alveolata	Dinoflagellata	Dinophyceae	Gymnodiniales	Gymnodiniales_unclassified	Gymnodiniales_unclassified
OTU_8175	0	0	0.000281594	0.000121479	0	0	0	0	0	0	0	0	0	1.54e-05	0	0	0	0	0	0	0	0	0	0	0	0	8.67e-05	3.14e-05	1.55e-05	0	8.31e-05	0	0	1.74e-05	0	0	0	Eukaryota	Alveolata	Dinoflagellata	Dinophyceae	Gymnodiniales	Gymnodiniaceae	Gyrodinium_helveticum
OTU_4509	0	0	0.00026148	0.000121479	0	2.43e-05	0	2.52e-05	0	0	0	0.000230542	0	6.17e-05	0	2.05e-05	0	0.00014161	0	0	0	0	0.000530777	0.000143184	0.002105	0.00181577	0.0018375	0.00278053	0.00259027	0.00138365	0.001441	0.000379363	0.000972978	0.000540739	0.000741517	0.000664542	0.000261805	Eukaryota	Hacrobia	Cryptophyta	Cryptophyceae	Cryptophyceae_X	Cryptomonadales	Cryptomonadales_unclassified
OTU_2357	0	0	0.00026148	0.000121479	0.00062944	0.000283472	0.000139005	0	0	0	0	9.22e-05	0.000113933	0.000108008	0	2.05e-05	5.24e-05	0.000336325	0	0	1.83e-05	1.96e-05	1.61e-05	0	0.00012302	5.04e-05	0.000121344	0.00018851	4.65e-05	0.000398323	8.31e-05	0.000830985	8.85e-05	0.000261648	9.67e-05	0.000204475	5.61e-05	Eukaryota	Alveolata	Dinoflagellata	Dinophyceae	Gymnodiniales	Gymnodiniaceae	Gyrodinium_unclassified
OTU_299	0.00410512	0.00575565	0.00026148	0.000121479	0	0	0	0	0.00187363	0.00730547	0.00100265	4.61e-05	1.42e-05	0	8.81e-05	0	0	0	0	0.000144774	0.000292863	0	0	0	0	0	0	0	0	0	0	0	0	0	0	0	0	Eukaryota	Alveolata	Dinoflagellata	Dinophyceae	Dinophyceae_unclassified	Dinophyceae_unclassified	Dinophyceae_unclassified
OTU_2700	0	0	0.00026148	0.000121479	0	4.86e-05	0	0	0	0	0	4.61e-05	4.27e-05	0	3.52e-05	2.05e-05	3.49e-05	0	0	0	0	0	0	0	0	0	0	0	0	0	0	0	0	0	0	0	0	Eukaryota	Stramenopiles	Ochrophyta	Bacillariophyta	Bacillariophyta_X	Polar-centric-Mediophyceae	Chaetoceros_decipiens
OTU_15310	0	0	0.00026148	0.000121479	0	3.24e-05	0	0	0	0	0	0	0	0	0	0	0	0	0	0	0	0	0	0	0	0	0	0	0	0	0	0	0	0	0	1.7e-05	0	Eukaryota	Stramenopiles	Ochrophyta	Bacillariophyta	Bacillariophyta_X	Polar-centric-Mediophyceae	Chaetoceros_unclassified
OTU_2399	0	0	0.000241366	0.000121479	0.000119893	8.1e-06	1.99e-05	0.00010074	0	0	0	0	0	0	0	0	0	0	0	0	0	0	0	0	0	0	0	0	0	0	0	0	0	0	0	0	0	Eukaryota	Alveolata	Dinoflagellata	Syndiniales	Dino-Group-II	Dino-Group-II-Clade-44	Dino-Group-II-Clade-44_X_sp.
OTU_11558	0	0	0.000221252	0.000121479	3e-05	0	0	0	0	0	0	2.31e-05	1.42e-05	1.54e-05	0	0	0	1.77e-05	0	0	0	0	3.22e-05	0	4.1e-05	0.000100876	0.000225354	0.000219929	0.000108574	4.19e-05	8.31e-05	0	0	0.000122102	3.22e-05	6.82e-05	3.74e-05	Eukaryota	Alveolata	Ciliophora	Spirotrichea	Strombidiida	Strombidiidae_R	Strombidium_R_unclassified
OTU_5975	0	0	0.000181025	0.000121479	0.00026976	0.000186282	0	0	0	0	5.57e-05	2.31e-05	1.42e-05	4.63e-05	1.76e-05	2.05e-05	0	0	0	0	0	0	0	0	9.57e-05	0	3.47e-05	9.43e-05	3.1e-05	0.000230608	2.77e-05	9.03e-05	6.63e-05	6.98e-05	1.61e-05	0	3.74e-05	Eukaryota	Archaeplastida	Chlorophyta	Mamiellophyceae	Mamiellales	Mamiellaceae	Micromonas polaris
OTU_6113	0	0	0.000160911	0.000121479	0	0	3.97e-05	5.04e-05	0	0	0	2.31e-05	0	1.54e-05	0	0	0	0	0	0	0	0	0	0	0.000164026	0.000218565	3.47e-05	0	0	0.000104822	0	1.81e-05	2.21e-05	0.000261648	6.45e-05	0.000136316	1.87e-05	Eukaryota	Alveolata	Ciliophora	Spirotrichea	Choreotrichida	Strobilidiidae_A	Strobilidiidae_A_X_sp.
OTU_3539	0	0	0.000160911	0.000121479	0.0004496	0.000275373	0	0	0	0	0	2.31e-05	0	0	0	0	0	0	0	0	0	0	0	0	0	0	0	0	0	0	0	0	0	3.49e-05	1.61e-05	0	0	Eukaryota	Hacrobia	Cryptophyta	Cryptophyceae	Cryptophyceae_X	Cryptomonadales	Teleaulax_amphioxeia
OTU_22256	0	0	0.000160911	0.000121479	0.00053952	0.000461654	0.00160848	0.000478517	0	0	2.79e-05	6.92e-05	0.000113933	0.000216016	0	0.000287026	3.49e-05	7.08e-05	0	0	0	0	0	0	5.47e-05	0.000134501	8.67e-05	4.71e-05	0.000155106	8.39e-05	0.000166269	0.000180649	6.63e-05	0.000209318	3.22e-05	0.000119277	0.000149603	Eukaryota	Alveolata	Dinoflagellata	Dinophyceae	Dinophyceae_unclassified	Dinophyceae_unclassified	Dinophyceae_unclassified
OTU_5211	0	0	0.000160911	0.000121479	0	0	0	0	0	0	0	0	0	0	0	0	0	0	0	0	0	0	0	0	0	0	0.000156014	0.000157092	1.55e-05	0	0	0	2.21e-05	0	0	0	0	Eukaryota	Eukaryota_unclassified	Eukaryota_unclassified	Eukaryota_unclassified	Eukaryota_unclassified	Eukaryota_unclassified	Eukaryota_unclassified
OTU_5781	0	0	0.000140797	0.000121479	0	3.24e-05	0.000139005	0.000125926	0	0	5.57e-05	2.31e-05	0.000227865	0.000108008	1.76e-05	2.05e-05	6.99e-05	0	0	0	0	0	0	0	1.37e-05	1.68e-05	1.73e-05	0	4.65e-05	2.1e-05	0.000110846	1.81e-05	6.63e-05	8.72e-05	4.84e-05	0.000153356	0.000112202	Eukaryota	Alveolata	Dinoflagellata	Dinophyceae	Gymnodiniales	Gymnodiniales_unclassified	Gymnodiniales_unclassified
OTU_5495	0	0	0.000140797	0.000121479	0	0	0	0	0	0	0	0	0	0	8.81e-05	0	0	3.54e-05	0	0	0	0	0	0	2.73e-05	8.41e-05	0.000242689	0.000251347	0.000124085	4.19e-05	0.000110846	0.000108389	4.42e-05	5.23e-05	0.00011284	0.000119277	5.61e-05	Eukaryota	Hacrobia	Telonemia	Telonemia_X	Telonemia_XX	Telonemia-Group-2	Telonema_antarcticum
OTU_6323	0	0	0.000120683	0.000121479	0.000299733	0.000283472	0	0	0	0	0	0	1.42e-05	3.09e-05	0	0	0	0	0	0	0	0	0	0	0	0	0	1.57e-05	0	6.29e-05	2.77e-05	0.000704531	0	0.000226761	1.61e-05	6.82e-05	0	Eukaryota	Alveolata	Alveolata_unclassified	Alveolata_unclassified	Alveolata_unclassified	Alveolata_unclassified	Alveolata_unclassified
OTU_1450	0	0	0.000120683	0.000121479	0	9.72e-05	0	0	0	0	2.79e-05	9.22e-05	1.42e-05	1.54e-05	0	0	0	1.77e-05	0	0	0	0	0.000112589	1.43e-05	0.00012302	0.00050438	0.000485378	0.000125674	0.000155106	2.1e-05	0.000221693	0.000144519	0.000132679	0.000261648	0.000161199	6.82e-05	9.35e-05	Eukaryota	Alveolata	Ciliophora	Spirotrichea	Strombidiida	Strombidiida_unclassified	Strombidiida_unclassified
OTU_155	0.00350583	0.00299024	0.000120683	0.000121479	0	0	0	0	0.000377522	0.00351925	0.000278513	0	1.42e-05	0	1.76e-05	0	1.75e-05	0	0	0.00108581	1.83e-05	0	0	0	0	0	0	0	0	0	0	0	0	0	0	0	0	Eukaryota	Stramenopiles	Ochrophyta	Chrysophyceae	Chrysophyceae_X	Chrysophyceae_X_unclassified	Chrysophyceae_X_unclassified
OTU_259	0.00458454	0.00339494	0.000100569	0.000121479	0	0	0	0	0.000237699	0.000776661	0.00225595	0.000299705	0	0	0	0	1.75e-05	0	0	1.45e-05	0	0	0	0	0	0	0	0	0	0	0	0	0	0	0	0	0	Eukaryota	Rhizaria	Cercozoa	Novel-clade-10-12	Novel-clade-10	Novel-clade-10_X	Novel-clade-10_XX_sp.
OTU_6173	0	0	0.000100569	0.000121479	0.000299733	0.000226778	0	0	0	0	0	0	4.27e-05	1.54e-05	0	0	0	0	0	0	0	0	0	0	0	1.68e-05	0	7.85e-05	0	0.000125786	0.000332539	0	0	3.49e-05	1.61e-05	0	0	Eukaryota	Alveolata	Ciliophora	Spirotrichea	Spirotrichea_unclassified	Spirotrichea_unclassified	Spirotrichea_unclassified
OTU_690	0.00104875	0.00186609	0.000100569	0.000121479	0	0	0	0	0	2.43e-05	0	0	1.42e-05	0	0.000105708	0	0	0	0	0	0	0	0	0	0	0	0	0	0	0	0	0	0	0	0	0	0	Eukaryota	Eukaryota_unclassified	Eukaryota_unclassified	Eukaryota_unclassified	Eukaryota_unclassified	Eukaryota_unclassified	Eukaryota_unclassified
OTU_11544	0	8.99e-05	8.05e-05	0.000121479	0.000299733	0.000251075	0	0.00010074	1.4e-05	0	0.000724133	0.000253596	0.00102539	0.000864064	0.00193798	0.000533049	0.00289885	0.000955871	0	0	1.83e-05	1.96e-05	4.83e-05	4.3e-05	0.000218702	0.000117689	0.000606722	0.000298475	0.000372255	0.00247379	0.000748213	0.000704531	0.00440051	0.00116869	0.00338519	0.00144836	0.00151473	Eukaryota	Archaeplastida	Chlorophyta	Mamiellophyceae	Mamiellales	Mamiellaceae	Micromonas_polaris
OTU_740	0	0	8.05e-05	0.000121479	0.000149867	2.43e-05	0	0	0	0	5.57e-05	9.22e-05	0.000797528	0.000678908	0.000651868	0	3.49e-05	0	0	0	0	0	0	0	1.37e-05	0	0	4.71e-05	0	2.1e-05	2.77e-05	0	0	0	0	1.7e-05	0	Eukaryota	Archaeplastida	Chlorophyta	Mamiellophyceae	Mamiellales	Mamiellaceae	Mamiella_gilva
OTU_17039	0.00020975	0.000112415	8.05e-05	0.000121479	0	0	0	0	1.4e-05	0	0	0	0	0	0	0	0	0	0	1.45e-05	0.00018304	0	0	0	0	0	0	0	0	0	0	0	0	0	0	0	0	Eukaryota	Opisthokonta	Choanoflagellida	Choanoflagellatea	Craspedida	Craspedida_unclassified	Craspedida_unclassified
OTU_3629	0	0	8.05e-05	0.000121479	3e-05	3.24e-05	0	0	0	0	2.79e-05	0.000230542	0	6.17e-05	0	2.05e-05	3.49e-05	3.54e-05	0	0	0	0	1.61e-05	0	0.000164026	5.04e-05	0.000208019	6.28e-05	0.000139595	0.000545073	0.000277116	5.42e-05	0.000619168	0.000313977	0.000402998	0.000238554	9.35e-05	Eukaryota	Alveolata	Ciliophora	Spirotrichea	Strombidiida	Strombidiidae_R	Strombidium_R_unclassified
OTU_293	0.0086597	0.00137147	8.05e-05	0.000121479	0	0	0	0	0.00018177	7.28e-05	0	0	0	0	0	0	0	0	0.000293418	0	0.00455768	0.000313044	0	1.43e-05	0	0	0	0	4.65e-05	0	0	0	0	0	0	0	0	Eukaryota	Alveolata	Ciliophora	Oligohymenophorea	Peniculia	Peniculida	Peniculida_unclassified
OTU_6463	0	0	8.05e-05	0.000121479	0.00053952	0.000170083	5.96e-05	2.52e-05	0	0	0	0.00016138	1.42e-05	9.26e-05	0	0.000205019	0.000401649	0.000212416	0	0	0	0	0	0	0.000109351	0.000184939	0.000294694	0.000282765	0.000170617	0.000188679	8.31e-05	0.000307103	6.63e-05	0.000313977	0.000177319	0.000323751	1.87e-05	Eukaryota	Alveolata	Dinoflagellata	Dinophyceae	Gymnodiniales	Gymnodiniaceae	Gyrodinium_helveticum
OTU_3716	0	0	8.05e-05	0.000121479	0.000119893	0.00029967	7.94e-05	5.04e-05	0	0	0	0.000484139	0	0	0	6.15e-05	0	5.31e-05	0	0	0	0	1.61e-05	4.3e-05	1.37e-05	0.000184939	8.67e-05	0	0.000186127	0	0.000138558	3.61e-05	0	0.000436079	6.45e-05	0.000102237	0.000205704	Eukaryota	Alveolata	Dinoflagellata	Dinophyceae	Gymnodiniales	Gymnodiniales_unclassified	Gymnodiniales_unclassified
OTU_853	0.00170797	0.00276541	8.05e-05	0.000121479	0	0	0	0	0.00255876	0.0104849	0	4.61e-05	0.000142416	4.63e-05	0.000123326	0	0	0	0	0.00173729	1.83e-05	0	0	0	0	0	0	0	0	0	0	0	0	0	0	0	0	Eukaryota	Alveolata	Dinoflagellata	Dinophyceae	Suessiales	Suessiaceae	Asulcocephalium_miricentonis
OTU_13045	0.000868966	0.000562076	6.03e-05	0.000121479	0	0	0	0	0.00103469	0.00111645	0	0	0	0	0	0	0	0	3.26e-05	0.00117267	0.000585727	0	0	2.86e-05	0	0	0	0	0	0	0	0	0	0	0	0	0	Eukaryota	Hacrobia	Cryptophyta	Cryptophyceae	Cryptophyceae_X	Cryptomonadales	Cryptomonas_pyrenoidifera
OTU_14595	0.000539358	0.00022483	6.03e-05	0.000121479	0	0	0	0	0.000223717	0.000436872	0.00272943	0.00016138	0	0	0	0	1.75e-05	3.54e-05	0.00260816	0.0056462	0.00069555	0.000234783	0	0	0	0	0	0	0	0	0	0	0	0	0	0	0	Eukaryota	Stramenopiles	Ochrophyta	Chrysophyceae	Chrysophyceae_X	Chrysophyceae_Clade-F	Chrysophyceae_Clade-F_unclassified
OTU_273	0.00464447	0.0109717	4.02e-05	0.000121479	0	0	0	0	0	0.00128634	0.000724133	0.000115271	5.7e-05	0	3.52e-05	0	0	0	0	1.45e-05	0	0	0	0	0	0	0	0	0	0	0	0	0	0	0	0	0	Eukaryota	Rhizaria	Cercozoa	Novel-clade-10-12	Novel-clade-10	Novel-clade-10_X	Novel-clade-10_XX_sp.
OTU_8346	0	2.25e-05	4.02e-05	0.000121479	0	0	0	0	0	0	0	0	0	0	0	0	0	0	0	0	0	0	9.65e-05	0	2.73e-05	0	3.47e-05	3.14e-05	7.76e-05	4.19e-05	2.77e-05	0	0	0	0	0	0	Eukaryota	Alveolata	Ciliophora	Spirotrichea	Strombidiida	Strombidiidae_R	Strombidium_R_unclassified
OTU_21494	0	0	4.02e-05	0.000121479	0.00071936	0.000226778	1.99e-05	0	0	0	0	4.61e-05	0	0.000154297	0	0.000369034	0.00017463	0.000106208	0	0	0	0	0	0	5.47e-05	8.41e-05	0.000312029	0.000377021	1.55e-05	0.000146751	5.54e-05	0.000523882	0	0.000488409	4.84e-05	0.000408949	5.61e-05	Eukaryota	Alveolata	Dinoflagellata	Dinophyceae	Dinophyceae_unclassified	Dinophyceae_unclassified	Dinophyceae_unclassified
OTU_2508	0.000868966	0.00022483	4.02e-05	0.000121479	0	0	0	0	0	0	0	0	0	0	0	0	0	0	0	0	0	0	0	0	0	0	0	0	0	0	0	0	0	0	0	0	0	Eukaryota	Stramenopiles	Ochrophyta	Synurophyceae	Synurales	Synurales_X	Mallomonas_heterospina
OTU_340	0	0.000134898	4.02e-05	0.000121479	0.00149867	0.00060744	0.00712896	0.0106029	0	0	0.000250661	0.000576356	0.00313314	0.00381114	0.0061487	0.00133262	0.00703758	0.0040536	0	0	0	0	0	0	1.37e-05	0	0.000121344	7.85e-05	1.55e-05	4.19e-05	0.000110846	0.000108389	0.000309584	0.000156989	0.000274039	0.000443028	0.000392707	Eukaryota	Stramenopiles	Stramenopiles_X	MAST	MAST-1	MAST-1A	MAST-1A_X_sp.
OTU_869	0.00116861	0.00103422	2.01e-05	0.000121479	0	0	0	0	0.000237699	2.43e-05	0.00253447	0.000322759	0	0	0	0	0	0	0	2.9e-05	0.000201344	0.000156522	0.00019301	4.3e-05	0	0	0	0	0	0	0	0	0	0	0	0	0	Eukaryota	Rhizaria	Cercozoa	Filosa-Thecofilosea	Filosa-Thecofilosea_X	Mataza-lineage	Mataza-lineage_X_sp.
OTU_4127	0	0	2.01e-05	0.000121479	0.000299733	0.000170083	7.94e-05	0.000302221	0	0	0	2.31e-05	0	1.54e-05	0	8.2e-05	0	7.08e-05	0	0	0	0	0	0	6.83e-05	8.41e-05	1.73e-05	3.14e-05	1.55e-05	0	0	0.000325168	0	0.000558182	6.45e-05	0.000153356	3.74e-05	Eukaryota	Alveolata	Ciliophora	Spirotrichea	Strombidiida	Strombidiidae	Strombidiidae_unclassified
OTU_58	0.00122854	0.00301272	2.01e-05	0.000121479	3e-05	0.000210579	0	0	0.000293628	0.000825203	0	0.000207488	0	0.000123438	0	0	0	0.000177013	3.26e-05	0.000130297	0.000896894	0.000273914	0	1.43e-05	1.37e-05	8.41e-05	0	0	1.55e-05	0	0	0	0	1.74e-05	0	0	0	Eukaryota	Alveolata	Ciliophora	CONThreeP	CONThreeP_X	Urotrichidae	Urotricha_sp.
OTU_4754	0	0	2.01e-05	0.000121479	0	0	0	0	0	0	0	0	0	0	0	0	0	1.77e-05	0	0	0	0	0	0	0.000109351	3.36e-05	6.93e-05	3.14e-05	4.65e-05	2.1e-05	2.77e-05	3.61e-05	0	0	0	0	0	Eukaryota	Alveolata	Ciliophora	CONThreeP	CONThreeP_X	CONThreeP_X_unclassified	CONThreeP_X_unclassified
OTU_3356	0	0	2.01e-05	0.000121479	0.000329707	0.000275373	0.000158863	0.000428147	0	0	2.79e-05	6.92e-05	4.27e-05	0.000108008	0	6.15e-05	5.24e-05	0	0	0	0	0	0	0	0	6.73e-05	6.93e-05	6.28e-05	0.000108574	2.1e-05	2.77e-05	0.000126454	6.63e-05	8.72e-05	6.45e-05	0.000102237	0.000187003	Eukaryota	Alveolata	Dinoflagellata	Dinophyceae	Gymnodiniales	Gymnodiniaceae	Gymnodinium_unclassified
OTU_11415	0	0	0	0.000121479	5.99e-05	5.67e-05	0	0	0	0	0	0	1.42e-05	4.63e-05	0	0	0	0	0	0	0	0	0	0	0	0	0	0	0	2.1e-05	0	1.81e-05	0	5.23e-05	0	0	0	Eukaryota	Alveolata	Ciliophora	Spirotrichea	Spirotrichea_unclassified	Spirotrichea_unclassified	Spirotrichea_unclassified
OTU_3078	8.99e-05	0.000157381	0	0.000121479	0	0	0	0	1.4e-05	0.000169895	0.000278513	4.61e-05	0	0	0	0	0	0	0	0	0	0	0	0	0	0	0	0	0	0	0	0	0	0	0	0	0	Eukaryota	Alveolata	Ciliophora	Oligohymenophorea	Peritrichia_2	Sessilida	Vorticella_gracilis
OTU_1572	0.000509394	0.00123657	0	0.000121479	0	0	0	0	1.4e-05	0	0	0	0	0	0	0	0	0	0	0	0	0	0	0	0	0	0	0	0	0	0	0	0	0	0	0	0	Eukaryota	Alveolata	Ciliophora	Spirotrichea	Strombidiida	Strombidiida_unclassified	Strombidiida_unclassified
OTU_103	0.000809037	0.000921804	0	0.000121479	0	0	0	0	4.19e-05	0.000485413	0.00309149	0.000968277	0	1.54e-05	0	0	0.000122241	0	6.52e-05	0.000550143	0.000713854	0.000313044	1.61e-05	8.59e-05	0	0	0	0	0	0	0	0	0	0	0	0	0	Eukaryota	Hacrobia	Cryptophyta	Cryptophyceae	Cryptophyceae_X	Basal_Cryptophyceae-1	Basal_Cryptophyceae-1_X_sp.
OTU_954	0	2.25e-05	0	0.000121479	0	0	0	0	0.00107664	0.00160186	8.36e-05	0	0	0	0	0	0	0	0.000293418	0.00050671	7.32e-05	0	0	0	0	0	0	0	0	0	0	0	0	0	0	0	0	Eukaryota	Hacrobia	Cryptophyta	Cryptophyceae	Cryptophyceae_X	Cryptomonadales	Cryptomonas_obovoidea
OTU_2015	0.00131843	0.000562076	0	0.000121479	0	0	0	0	0	0	8.36e-05	0	0	0	1.76e-05	0	0	0	0	0	5.49e-05	0	0	0	0	0	0	0	0	0	0	0	0	0	0	0	0	Eukaryota	Eukaryota_unclassified	Eukaryota_unclassified	Eukaryota_unclassified	Eukaryota_unclassified	Eukaryota_unclassified	Eukaryota_unclassified
OTU_3865	0	0	0.000382163	0.000104125	0.00143872	0.0010124	0.000536161	0.000478517	0	0	0	9.22e-05	0.000541179	0.00226817	0	0.000451041	1.75e-05	0.000106208	0	0	0	0	0	0	6.83e-05	0.000201752	0.000138679	0.000109964	3.1e-05	0.000104822	0.000360251	0.000325168	6.63e-05	0.000593068	0	0.000153356	0.000130902	Eukaryota	Alveolata	Dinoflagellata	Dinophyceae	Dinophyceae_unclassified	Dinophyceae_unclassified	Dinophyceae_unclassified
OTU_4470	0	0	0.000321822	0.000104125	0	1.62e-05	0	2.52e-05	0	0	0	0	0	0	0	0	0	1.77e-05	0	0	0	0	4.83e-05	0	0.000136689	0.000151314	1.73e-05	1.57e-05	0.000124085	0.000104822	0.000304827	0	0.000110566	0	1.61e-05	0	3.74e-05	Eukaryota	Alveolata	Ciliophora	Spirotrichea	Spirotrichea_unclassified	Spirotrichea_unclassified	Spirotrichea_unclassified
OTU_1280	0	0	0.000301708	0.000104125	5.99e-05	0.000550746	0	0	0	0	0	2.31e-05	1.42e-05	0	0	0	0	0	0	0	0	0	0	0	0	0	0	0	0	0	0	0	0	0	0	0	0	Eukaryota	Stramenopiles	Ochrophyta	Bacillariophyta	Bacillariophyta_X	Polar-centric-Mediophyceae	Polar-centric-Mediophyceae_unclassified
OTU_6084	0	0	0.000281594	0.000104125	0.000239787	0.000453555	0	0	0	0	0	0	0	0	0	0	0	0	0	0	0	0	0	0	0	0	0	0	0	0	0	1.81e-05	2.21e-05	3.49e-05	1.61e-05	1.7e-05	0	Eukaryota	Alveolata	Dinoflagellata	Dinophyceae	Dinophyceae_unclassified	Dinophyceae_unclassified	Dinophyceae_unclassified
OTU_4769	3e-05	0	0.00026148	0.000104125	0	8.1e-06	0.000278009	0.000478517	0	0	2.79e-05	0	0.000341798	0.000262305	3.52e-05	2.05e-05	8.73e-05	7.08e-05	0	0	0	1.96e-05	4.83e-05	2.86e-05	2.73e-05	5.04e-05	0.000225354	1.57e-05	7.76e-05	0.000146751	0.000166269	0.000144519	2.21e-05	3.49e-05	8.06e-05	6.82e-05	9.35e-05	Eukaryota	Alveolata	Dinoflagellata	Dinophyceae	Peridiniales	Peridiniales_unclassified	Peridiniales_unclassified
OTU_7893	0	0	0.00026148	0.000104125	0	0.000413059	0	0	0	0	0	0	4.27e-05	1.54e-05	3.52e-05	2.05e-05	1.75e-05	0	0	0	0	0	0	0	0	0	0	0	0	0	0	0	0	0	0	0	0	Eukaryota	Stramenopiles	Ochrophyta	Bacillariophyta	Bacillariophyta_X	Polar-centric-Mediophyceae	Chaetoceros_decipiens
OTU_1906	0.000599287	0.000764423	0.00026148	0.000104125	0	0	0	0	1.4e-05	0	0	0	0	0	0	0	0	0	0	0	0	0	0	0	0	0	0	0	0	0	0	0	0	0	0	0	0	Eukaryota	Stramenopiles	Ochrophyta	Chrysophyceae	Chrysophyceae_X	Chrysophyceae_Clade-E	Chrysophyceae_Clade-E_unclassified
OTU_6774	0	0	0.000241366	0.000104125	0.000209813	0.000129587	0.000278009	0.000327406	4.19e-05	0	0.000919092	0.00306621	0.00837404	0.0052461	0.000422833	0.00264474	0.00260198	0.0124263	0	2.9e-05	0	0.000430436	0.00181751	0.000630011	0.00185896	0.00240421	0.00364034	0.00488556	0.00296253	0.00666667	0.00565316	0.00574463	0.00628013	0.00174432	0.00432014	0.00214698	0.00267415	Eukaryota	Hacrobia	Cryptophyta	Cryptophyceae	Cryptophyceae_X	Cryptomonadales	Teleaulax_gracilis
OTU_2556	0.000539358	0.000404694	0.000241366	0.000104125	0.000209813	0.000340166	5.96e-05	0.000201481	4.19e-05	0.000121353	0	2.31e-05	1.42e-05	3.09e-05	5.29e-05	4.1e-05	0	0	0	0	1.83e-05	0	0	0	0	5.04e-05	6.93e-05	0	6.2e-05	0	0	0	8.85e-05	0	0.000161199	5.11e-05	0.000374007	Eukaryota	Alveolata	Dinoflagellata	Dinophyceae	Dinophyceae_unclassified	Dinophyceae_unclassified	Dinophyceae_unclassified
OTU_6881	0	0	0.000221252	0.000104125	0	2.43e-05	0	0	0	0	0	4.61e-05	0.000113933	0.000154297	0	0.000123011	0	1.77e-05	0	0	0	0	0	0	0	0	0	0	0	0	0	0.000126454	0	8.72e-05	0	1.7e-05	0	Eukaryota	Alveolata	Ciliophora	Spirotrichea	Spirotrichea_unclassified	Spirotrichea_unclassified	Spirotrichea_unclassified
OTU_4824	0	0	0.000221252	0.000104125	0.000509547	0.000348266	7.94e-05	0	0	0	0	0.000276651	4.27e-05	0.000308594	0	0.000615057	0.000541352	0.000300922	0	1.45e-05	0	0	0	0	0.000232371	0.000201752	0.000520048	0.00058124	4.65e-05	0.000209644	0.000193981	0.00084905	6.63e-05	0.000802386	0.000145079	0.000528226	7.48e-05	Eukaryota	Alveolata	Dinoflagellata	Dinophyceae	Gymnodiniales	Gymnodiniaceae	Gymnodiniaceae_unclassified
OTU_1591	0.00536362	0.00730698	0.000221252	0.000104125	0	0	0	0	0	7.28e-05	0	0	0	0	0	0	0	0	0	0	0	0	0	0	0	0	0	0	0	0	0	0	0	0	0	0	0	Eukaryota	Stramenopiles	Ochrophyta	Ochrophyta_unclassified	Ochrophyta_unclassified	Ochrophyta_unclassified	Ochrophyta_unclassified
OTU_6885	0	0	0.000201138	0.000104125	0	0	1.99e-05	5.04e-05	0	0	0	2.31e-05	0	1.54e-05	0	0	0	0	0	0	0	0	1.61e-05	1.43e-05	0.000191364	0.000302628	0.000173349	0.000157092	0.000232659	6.29e-05	0.000221693	1.81e-05	2.21e-05	1.74e-05	0.000128959	0.000170395	7.48e-05	Eukaryota	Alveolata	Dinoflagellata	Dinophyceae	Peridiniales	Heterocapsaceae	Heterocapsa_rotundata
OTU_1754	0.00281665	0.00182113	0.000181025	0.000104125	0	0	0	0	0	0	0	0	0	0	0	0	0	0	0.00635738	0	0.0036974	0.00176087	3.22e-05	0	0.000150357	0	0	0	0.000155106	2.1e-05	0	0	0	0	0	0	0	Eukaryota	Alveolata	Ciliophora	Litostomatea	Haptoria_4	Didiniidae	Didiniidae_X_sp.
OTU_250	0.0042849	0.00200099	0.000160911	0.000104125	0	0	0	0	0.00343964	0.0151206	0.00203314	0.000345813	0	0	0	0	0	0	0.00218433	0.00196893	0.000420991	0.000215218	0	0	0	0	3.47e-05	0	0	0	0	0	0	0	0	0	0	Eukaryota	Stramenopiles	Ochrophyta	Chrysophyceae	Chrysophyceae_X	Chrysophyceae_Clade-E	Chrysophyceae_Clade-E_X_sp.
OTU_232	0.00335601	0.00299024	0.000160911	0.000104125	0	0	0	0	0.000153805	0.000533955	0	0	0	0	0	0	0	0	0	8.69e-05	0	0	0	0	0	0	0	0	0	0	0	0	0	0	0	0	0	Eukaryota	Stramenopiles	Ochrophyta	Chrysophyceae	Chrysophyceae_X	Chrysophyceae_XX	Chrysophyceae_XXX_sp.
OTU_13712	0	6.74e-05	0.000140797	0.000104125	0.0008992	0.000591242	9.93e-05	0.000176296	0	0	0.00214455	0.00228237	0.00244955	0.00226817	0.00428118	0.00190668	0.00684549	0.00226577	0	0	0	7.83e-05	9.65e-05	0.000143184	0.000683443	0.000218565	0.00140413	0.000754041	0.00103921	0.0051782	0.00185668	0.00149939	0.00966344	0.00303511	0.00694769	0.00327159	0.00372136	Eukaryota	Archaeplastida	Chlorophyta	Mamiellophyceae	Mamiellales	Mamiellaceae	Micromonas_unclassified
OTU_699	0.000149822	2.25e-05	0.000140797	0.000104125	0.00035968	0.000720829	0.00782398	0.00481036	1.4e-05	0	0.000668431	0.00350424	0.000526938	0.00162012	0.000299507	0.00174266	0.000977927	0.00723984	0	0	1.83e-05	1.96e-05	1.61e-05	4.3e-05	0.000150357	0.00282453	0.0133306	0.000864006	0.00465318	0.00067086	0.0115834	0.000560012	0.0203883	0.0016571	0.021375	0.00320344	0.0207574	Eukaryota	Alveolata	Dinoflagellata	Dinophyceae	Peridiniales	Thoracosphaeraceae	Thoracosphaeraceae_unclassified
OTU_6087	0	0	0.000140797	0.000104125	0.0004496	0.000218678	1.99e-05	0	0	0	0	0	1.42e-05	0	0	0	0	0	0	0	0	0	0	0	0	0	0	3.14e-05	0	0	0	0	4.42e-05	1.74e-05	0	0	0	Eukaryota	Eukaryota_unclassified	Eukaryota_unclassified	Eukaryota_unclassified	Eukaryota_unclassified	Eukaryota_unclassified	Eukaryota_unclassified
OTU_3628	0	0	0.000120683	0.000104125	0.000209813	0.000259174	0	0	0	0	0	2.31e-05	2.85e-05	4.63e-05	0	0	0	0	0	0	0	0	0	0	0	3.36e-05	3.47e-05	0	3.1e-05	0	0.000166269	0.000216779	0	6.98e-05	0.000128959	5.11e-05	1.87e-05	Eukaryota	Alveolata	Ciliophora	Spirotrichea	Spirotrichea_unclassified	Spirotrichea_unclassified	Spirotrichea_unclassified
OTU_8781	0	0	0.000120683	0.000104125	0.00026976	0.000145786	0	2.52e-05	0	0	0	0	0	0	0	0	0	0	0	0	0	0	0	0	0	0	0	0	0	0	0	0	0	0	1.61e-05	0	0	Eukaryota	Hacrobia	Cryptophyta	Cryptophyceae	Cryptophyceae_X	Cryptomonadales	Cryptomonadales_unclassified
OTU_310	0	0	0.000120683	0.000104125	0	0	0	2.52e-05	0	0	0.000194959	0.000115271	0.000128174	3.09e-05	1.76e-05	2.05e-05	3.49e-05	7.08e-05	0	0	0	0.028624	0.051984	0.106773	0.070586	0.037963	0.0157921	0.0240822	0.00860839	0.00490566	0.00205066	0.00525688	0.000552828	0.000575625	0.000644797	0.00168691	0.000673212	Eukaryota	Hacrobia	Katablepharidophyta	Katablepharidaceae	Katablepharidales	Katablepharidales_X	Katablepharidales_X_unclassified
OTU_3960	0	0	0.000100569	0.000104125	0.00017984	0.000153885	1.99e-05	2.52e-05	0	0	0	0	0	0	0	0	0	0	0	0	0	0	0	0	0	0	0	0	0	6.29e-05	0	1.81e-05	2.21e-05	8.72e-05	0	0	0	Eukaryota	Archaeplastida	Chlorophyta	Mamiellophyceae	Mamiellales	Mamiellaceae	Micromonas_unclassified
OTU_8851	0	0	0.000100569	0.000104125	3e-05	0.000178182	0	0	0	0	0	0	1.42e-05	0	0	0	0	0	0	0	0	0	0	0	0	0	0	0	0	0	0	0	0	0	0	0	0	Eukaryota	Alveolata	Ciliophora	Spirotrichea	Spirotrichea_unclassified	Spirotrichea_unclassified	Spirotrichea_unclassified
OTU_3232	0	0	0.000100569	0.000104125	3e-05	4.05e-05	0	0	0	0	0	4.61e-05	1.42e-05	0	3.52e-05	0	3.49e-05	0.00014161	0	0	0	0	0	0	5.47e-05	0.000168127	0.000398703	0.000424148	0.00024817	0.000607966	0.000637366	7.23e-05	0.000221131	0.000313977	0.000225679	0.000323751	9.35e-05	Eukaryota	Alveolata	Ciliophora	Spirotrichea	Strombidiida	Strombidiidae_R	Strombidium_R_unclassified
OTU_11272	0	0	0.000100569	0.000104125	0	0	0	0	0	0	0	0	0	0	0	0	0	0	0	0	0	0	6.43e-05	0	0.000287046	0.000487567	0.00010401	4.71e-05	6.2e-05	0.000146751	2.77e-05	0	2.21e-05	0	8.06e-05	1.7e-05	3.74e-05	Eukaryota	Alveolata	Ciliophora	Spirotrichea	Strombidiida	Strombidiidae_R	Strombidium_R_unclassified
OTU_6412	0	0	0.000100569	0.000104125	0.000149867	8.1e-05	0	0	0	0	0	0	0	0	0	0	0	0	0	0	0	0	0	0	0	3.36e-05	0	0	0	0	0	0.000126454	0	0.000104659	3.22e-05	0	0	Eukaryota	Alveolata	Dinoflagellata	Dinophyceae	Gymnodiniales	Gymnodiniaceae	Gymnodiniaceae_unclassified
OTU_6756	0	0	0.000100569	0.000104125	0	8.1e-06	1.99e-05	0	0	0	2.79e-05	0	1.42e-05	0	0	2.05e-05	1.75e-05	0	0	0	0	0	3.22e-05	0	5.47e-05	0.000100876	8.67e-05	0.000125674	0.000294702	0.000125786	0.000942194	3.61e-05	2.21e-05	0	0	0	1.87e-05	Eukaryota	Alveolata	Dinoflagellata	Dinophyceae	Peridiniales	Heterocapsaceae	Heterocapsa_rotundata
OTU_8478	0	0	8.05e-05	0.000104125	0.002248	0.000963805	0	0.00010074	0	0	2.79e-05	0	2.85e-05	3.09e-05	5.29e-05	0	0	1.77e-05	0	0	0	0	0	0	2.73e-05	0	0	0	0	4.19e-05	2.77e-05	5.42e-05	0	0	8.06e-05	3.41e-05	0	Eukaryota	Archaeplastida	Chlorophyta	Mamiellophyceae	Mamiellales	Mamiellaceae	Micromonas_unclassified
OTU_382	0	0	8.05e-05	0.000104125	5.99e-05	5.67e-05	0	2.52e-05	0	0	0	0	5.7e-05	0.00054004	0	0.000184517	3.49e-05	0	0	0	0	0	0	0	0	3.36e-05	0	0	0	0	0	0	0	0	0	0	1.87e-05	Eukaryota	Alveolata	Ciliophora	Spirotrichea	Strombidiida	Tontoniidae_B	Tontoniidae_B_X_sp.
OTU_21685	0	0	8.05e-05	0.000104125	0.000209813	0.00020248	3.97e-05	0.000151111	0	0	0	9.22e-05	0.00027059	0.000293165	0.000140944	0.000164015	1.75e-05	0.000106208	0	0	0	0	0	0	6.83e-05	0.000134501	5.2e-05	9.43e-05	0.000124085	0	0	3.61e-05	2.21e-05	0.000139545	0.00011284	3.41e-05	1.87e-05	Eukaryota	Alveolata	Dinoflagellata	Dinophyceae	Gymnodiniales	Gymnodiniaceae	Gyrodinium_unclassified
OTU_1713	0	0	8.05e-05	0.000104125	0.000149867	6.48e-05	0.00174749	0.00120889	1.4e-05	0	2.79e-05	0	1.42e-05	3.09e-05	0.000140944	6.15e-05	1.75e-05	5.31e-05	0	0	0	0	0	0	0	6.73e-05	3.47e-05	0	4.65e-05	2.1e-05	5.54e-05	0	0.000176905	1.74e-05	8.06e-05	3.41e-05	0.000355306	Eukaryota	Alveolata	Dinoflagellata	Dinophyceae	Dinophyceae_unclassified	Dinophyceae_unclassified	Dinophyceae_unclassified
OTU_3426	0	0	8.05e-05	0.000104125	8.99e-05	0.000129587	5.96e-05	2.52e-05	0	0	8.36e-05	0.000184434	0.000156657	0.000154297	0	0	1.75e-05	0.00026552	0	0	0	0	0	0	1.37e-05	3.36e-05	0.000173349	3.14e-05	4.65e-05	0.000104822	0.000221693	5.42e-05	0.000420149	6.98e-05	0.000177319	3.41e-05	0.000261805	Eukaryota	Alveolata	Dinoflagellata	Dinophyceae	Dinophyceae_unclassified	Dinophyceae_unclassified	Dinophyceae_unclassified
OTU_418	0	0	8.05e-05	0.000104125	3e-05	3.24e-05	0.000238294	0.000176296	0	0	5.57e-05	0.000207488	0.000669354	0.00132696	0.000123326	0.000348532	0.000366723	3.54e-05	0	0	0	0	0	0	2.73e-05	5.04e-05	0.000173349	3.14e-05	7.76e-05	6.29e-05	0.000110846	3.61e-05	4.42e-05	6.98e-05	6.45e-05	8.52e-05	7.48e-05	Eukaryota	Alveolata	Dinoflagellata	Syndiniales	Dino-Group-III	Dino-Group-III_X	Dino-Group-III_XX_sp.
OTU_774	0.000479429	0.00128153	6.03e-05	0.000104125	0	0	0	0	0.000209734	0.000412601	0.000362067	2.31e-05	0	0	0	0	0	0	0	0	0.000549119	0.000254348	0.000128673	0	0	0	0	0	1.55e-05	0	0	0	0	0	0	0	0	Eukaryota	Rhizaria	Cercozoa	Filosa-Thecofilosea	Cryomonadida	Protaspa-lineage	Protaspa-lineage_X_sp.
OTU_6296	0	0	6.03e-05	0.000104125	0.000209813	0.000137686	1.99e-05	2.52e-05	0	0	0	0	0	3.09e-05	3.52e-05	0	0	1.77e-05	0	0	0	0	3.22e-05	0	0.000150357	6.73e-05	0.000121344	0.000204219	0.000155106	0.000377358	5.54e-05	0.000162584	0.000132679	0.000139545	0.000128959	8.52e-05	5.61e-05	Eukaryota	Archaeplastida	Chlorophyta	Mamiellophyceae	Mamiellales	Bathycoccaceae	Bathycoccus_prasinos
OTU_2655	0.000749109	0.00134898	6.03e-05	0.000104125	0	0	0	0	0	0	0	0	0	0	0	0	0	0	0.0050207	5.79e-05	0.00746801	1.96e-05	0	1.43e-05	0	0	0	0	0	0	0	0	0	0	0	0	0	Eukaryota	Alveolata	Ciliophora	Spirotrichea	Choreotrichida	Choreotrichida_unclassified	Choreotrichida_unclassified
OTU_3295	0	0	6.03e-05	0.000104125	0.000239787	8.91e-05	5.96e-05	2.52e-05	0	0	0	4.61e-05	4.27e-05	1.54e-05	0	0.000123011	3.49e-05	3.54e-05	0	0	0	0	0	0	9.57e-05	0.000100876	0.000277359	0.000282765	9.31e-05	0.000440252	0.000110846	0.00101163	6.63e-05	0.000156989	0.000161199	0.000255593	7.48e-05	Eukaryota	Eukaryota_unclassified	Eukaryota_unclassified	Eukaryota_unclassified	Eukaryota_unclassified	Eukaryota_unclassified	Eukaryota_unclassified
OTU_20528	0	0	6.03e-05	0.000104125	0.000839253	0.000558845	3.97e-05	7.56e-05	0	0	0.000306364	0.000368868	0.00146688	0.00143496	0.00237844	0.00268575	0.00289885	0.000354026	0	0	0	0	0	0	8.2e-05	1.68e-05	0.000156014	0	0.000139595	0.000314465	8.31e-05	0.000162584	0.000486489	0.000226761	0.000209559	0.000715661	0.000187003	Eukaryota	Hacrobia	Haptophyta	Prymnesiophyceae	Prymnesiales	Chrysochromulinaceae	Chrysochromulina_sp.
OTU_12753	0	2.25e-05	4.02e-05	0.000104125	0.000509547	0.000332067	9.93e-05	0.000151111	1.4e-05	0	0.00133686	0.000760789	0.00156657	0.0011418	0.00306554	0.000922585	0.00440067	0.0013807	0	0	0	3.91e-05	9.65e-05	0.000100229	0.000451072	0.00025219	0.00147347	0.000424148	0.000697977	0.00324948	0.00130244	0.00121035	0.00714254	0.00197108	0.00473926	0.00199363	0.00201964	Eukaryota	Archaeplastida	Chlorophyta	Mamiellophyceae	Mamiellales	Mamiellaceae	Micromonas_unclassified
OTU_3621	0	0	4.02e-05	0.000104125	0.000119893	0.000283472	0	0	0	0	0	2.31e-05	2.85e-05	0.00120352	0	0.000574053	5.24e-05	0	0	0	0	0	0	0	0	0	0	0	0	0	0	0	0	0	0	0	5.61e-05	Eukaryota	Alveolata	Ciliophora	Spirotrichea	Strombidiida	Tontoniidae_B	Tontoniidae_B_X_sp.
OTU_2317	0.00185779	0.00321507	4.02e-05	0.000104125	0	0	0	0	0	0	0	0	0	0	0	0	0	0	0.000423826	2.9e-05	0.00400857	0.000821741	0	1.43e-05	0	0	0	0	1.55e-05	0	0	0	0	0	0	0	0	Eukaryota	Alveolata	Ciliophora	Spirotrichea	Choreotrichida	Strobilidiidae_G	Strobilidiidae_G_X_sp.
OTU_809	0.00287658	0.00074194	4.02e-05	0.000104125	0	0	0	0	0.00123044	0.00145624	5.57e-05	0	0	0	0	0	0	0	0.00149969	0.00138983	0.00653451	0.000117392	0	0	0.00012302	0	6.93e-05	0	9.31e-05	0	0	0	0	0	0	1.7e-05	0	Eukaryota	Hacrobia	Cryptophyta	Cryptophyceae	Cryptophyceae_X	Cryptomonadales	Cryptomonas_curvata
OTU_23251	0	0	4.02e-05	0.000104125	0.000929173	0.000615539	0.000258152	0.000302221	0	0	0	4.61e-05	5.7e-05	0.000262305	0	0.000164015	0.000122241	0.000123909	0	0	0	0	0	0	4.1e-05	6.73e-05	0.00010401	0.000141383	0.000124085	4.19e-05	0.000110846	0.000379363	0	0.000209318	0.000225679	0.000425989	0.000205704	Eukaryota	Alveolata	Dinoflagellata	Dinophyceae	Dinophyceae_unclassified	Dinophyceae_unclassified	Dinophyceae_unclassified
OTU_777	0	0	4.02e-05	0.000104125	0.000479573	0.000234877	0.0029191	0.00191407	0	0	0	0	0	3.09e-05	0	4.1e-05	0	7.08e-05	0	0	0	0	0	0	0	8.41e-05	0.000242689	0	6.2e-05	2.1e-05	0.000249404	3.61e-05	0.000243244	0.000104659	0.000290159	0.000255593	0.000317906	Eukaryota	Alveolata	Dinoflagellata	Dinophyceae	Dinophyceae_unclassified	Dinophyceae_unclassified	Dinophyceae_unclassified
OTU_585	0	0	4.02e-05	0.000104125	0.000119893	5.67e-05	0.000158863	0.000125926	0	0	0	0	8.54e-05	1.54e-05	0.000211416	8.2e-05	3.49e-05	0	0	0	0	0	0	0	0	0	0	0	0	0	0	0	0	0	0	0	0	Eukaryota	Alveolata	Dinoflagellata	Syndiniales	Dino-Group-II	Dino-Group-II_X	Dino-Group-II-Clade-52_X_sp.
OTU_20510	0	0	4.02e-05	0.000104125	8.99e-05	7.29e-05	0	0	0	0	0	0	0	0	0	0	0	0	0	0	0	0	0	0	0	0	0	1.57e-05	1.55e-05	0	0	0.000144519	0	0.000104659	1.61e-05	0	0	Eukaryota	Alveolata	Dinoflagellata	Dinophyceae	Gymnodiniales	Gymnodiniaceae	Gymnodiniaceae_unclassified
OTU_1781	0	0	4.02e-05	0.000104125	0	0.000364464	0	0	0	0	0	0	2.85e-05	0	3.52e-05	0	0	0	0	0	0	0	0	0	0	0	3.47e-05	0	0	0	0	0	0	0	3.22e-05	0	0	Eukaryota	Alveolata	Dinoflagellata	Syndiniales	Dino-Group-II	Dino-Group-II-Clade-1	Dino-Group-II-Clade-1_X_sp.
OTU_1974	0.00146825	0.0014614	4.02e-05	0.000104125	0	0	0	0	0.00460018	0.0102422	0	0	0	0	1.76e-05	0	0	0	3.26e-05	0.000231639	0	0	0	0	0	0	0	0	1.55e-05	0	0	0	0	0	0	0	0	Eukaryota	Alveolata	Dinoflagellata	Dinophyceae	Dinophyceae_unclassified	Dinophyceae_unclassified	Dinophyceae_unclassified
OTU_906	0.00314626	0.00272045	4.02e-05	0.000104125	0	0	0	0	0.000307611	0.000194165	0	0	0	0	1.76e-05	0	0	0	0.000195612	8.69e-05	5.49e-05	3.91e-05	0	0	0	0	0	0	0	2.1e-05	0	0	0	0	0	0	0	Eukaryota	Alveolata	Dinoflagellata	Dinophyceae	Dinophyceae_unclassified	Dinophyceae_unclassified	Dinophyceae_unclassified
OTU_18796	0.00020975	0.000179864	4.02e-05	0.000104125	0	0	0	0	0.000111858	0.000533955	2.79e-05	2.31e-05	0	0	0	0	0	0	6.52e-05	7.24e-05	1.83e-05	1.96e-05	0	0	0	0	0	0	0	0	0	0	0	0	0	0	0	Eukaryota	Alveolata	Dinoflagellata	Dinophyceae	Dinophyceae_unclassified	Dinophyceae_unclassified	Dinophyceae_unclassified
OTU_7751	0	0	4.02e-05	0.000104125	3e-05	8.1e-06	0	2.52e-05	0	0	0	6.92e-05	0.000256348	0.000216016	0	6.15e-05	3.49e-05	0.000194714	0	0	0	0	0	0	1.37e-05	0.000151314	0.000260024	0.000204219	3.1e-05	0.000440252	0.000166269	0.000505817	0.000132679	0.000122102	0.00011284	0.000238554	0.000299205	Eukaryota	Eukaryota_unclassified	Eukaryota_unclassified	Eukaryota_unclassified	Eukaryota_unclassified	Eukaryota_unclassified	Eukaryota_unclassified
OTU_6198	0	0	4.02e-05	0.000104125	0	0	0	0	0	0	0	0	1.42e-05	1.54e-05	0	0	0	3.54e-05	0	0	0	0	0	0	4.1e-05	5.04e-05	0.000277359	0.000141383	3.1e-05	4.19e-05	2.77e-05	5.42e-05	2.21e-05	3.49e-05	9.67e-05	8.52e-05	3.74e-05	Eukaryota	Eukaryota_unclassified	Eukaryota_unclassified	Eukaryota_unclassified	Eukaryota_unclassified	Eukaryota_unclassified	Eukaryota_unclassified
OTU_2089	0.000329608	0.00096677	4.02e-05	0.000104125	0	0	0	0	0	0	2.79e-05	0	0	0	0	0	0	0	0	0	0	0	0	0	0	0	0	0	0	0	0	0	0	0	0	0	0	Eukaryota	Eukaryota_unclassified	Eukaryota_unclassified	Eukaryota_unclassified	Eukaryota_unclassified	Eukaryota_unclassified	Eukaryota_unclassified
OTU_5691	0	0	4.02e-05	0.000104125	0	0.000113389	0	0	0	0	0	0.000184434	5.7e-05	4.63e-05	3.52e-05	2.05e-05	8.73e-05	7.08e-05	0	0	0	0	0	0	2.73e-05	6.73e-05	6.93e-05	3.14e-05	0.000139595	0.000209644	0.000166269	0.000252908	0.000199018	0.000296534	6.45e-05	0.000187435	0.000205704	Eukaryota	Stramenopiles	Ochrophyta	Bacillariophyta	Bacillariophyta_X	Polar-centric-Mediophyceae	Chaetoceros_brevis
OTU_829	0.00365565	0.00308017	4.02e-05	0.000104125	0	0	0	0	0.00190159	0.00684433	0.00022281	0	0	0	0	0	0	0	0.000195612	0.00319951	0.000384383	0	0	0	0	0	0	0	0	0	0	0	0	0	0	0	0	Eukaryota	Stramenopiles	Ochrophyta	Chrysophyceae	Chrysophyceae_X	Chrysophyceae_X_unclassified	Chrysophyceae_X_unclassified
OTU_573	0.00356576	0.00218085	4.02e-05	0.000104125	0	0	0	0	0	0.00160186	0.000167108	0	0	0	5.29e-05	0	0	0	0	0.000304026	1.83e-05	0	0	0	0	0	0	0	0	0	0	0	0	0	0	0	0	Eukaryota	Stramenopiles	Ochrophyta	Ochrophyta_unclassified	Ochrophyta_unclassified	Ochrophyta_unclassified	Ochrophyta_unclassified
OTU_3630	0	0	2.01e-05	0.000104125	0	0	0	0	0	0	0	2.31e-05	1.42e-05	1.54e-05	0	0	0	0	0	0	0	0	6.43e-05	1.43e-05	0.000779125	0.000386691	0.000138679	0.000361311	0.000170617	4.19e-05	2.77e-05	7.23e-05	2.21e-05	0	4.84e-05	5.11e-05	0	Eukaryota	Alveolata	Ciliophora	Spirotrichea	Strombidiida	Strombidiidae_R	Strombidium_R_unclassified
OTU_1102	0.00233722	0.0011916	2.01e-05	0.000104125	0	0	0	0	6.99e-05	0	0	0	0	0	0	0	0	0	0.00016301	0	0	0	0	0	0	0	0	0	0	0	0	0	0	0	0	0	0	Eukaryota	Hacrobia	Cryptophyta	Cryptophyceae	Cryptophyceae_X	Cryptomonadales	Cryptomonas_unclassified
OTU_3531	0	0	2.01e-05	0.000104125	0.000209813	0.00010529	0	0	0	2.43e-05	0	0	0	3.09e-05	0	2.05e-05	0	0	0	0	0	0	0	0	0	0	0	0	0	0	0	0	0	0	0	0	0	Eukaryota	Stramenopiles	Ochrophyta	Chrysophyceae	Chrysophyceae_X	Chrysophyceae_Clade-C	Chrysophyceae_Clade-C_unclassified
OTU_10990	0	0	0	0.000104125	0	7.29e-05	0	0	0	0	0	0	5.7e-05	3.09e-05	0	0	0	0	0	0	0	0	0	0	0	0	0	0	0	4.19e-05	0	1.81e-05	0	5.23e-05	0	0	0	Eukaryota	Alveolata	Ciliophora	Spirotrichea	Strombidiida_G	Strombidiida_G_X	Strombidium_G_X_unclassified
OTU_6585	0	0	0	0.000104125	0.000299733	0.000680333	0	0	0	0	2.79e-05	4.61e-05	4.27e-05	3.09e-05	1.76e-05	0.000369034	0	1.77e-05	0	0	0	0	0	0	0	0	0	0	3.1e-05	0	0.000193981	0	4.42e-05	5.23e-05	1.61e-05	3.41e-05	3.74e-05	Eukaryota	Alveolata	Dinoflagellata	Dinophyceae	Dinophyceae_unclassified	Dinophyceae_unclassified	Dinophyceae_unclassified
OTU_22926	0	0	0	0.000104125	0.000299733	0.000178182	0.000158863	0.000125926	0	0	2.79e-05	0.000138325	1.42e-05	9.26e-05	1.76e-05	6.15e-05	0.000122241	7.08e-05	0	0	1.83e-05	0	0	0	0	1.68e-05	0.000138679	1.57e-05	1.55e-05	8.39e-05	8.31e-05	1.81e-05	8.85e-05	6.98e-05	0.000370758	5.11e-05	0.000430108	Eukaryota	Alveolata	Dinoflagellata	Dinophyceae	Dinophyceae_unclassified	Dinophyceae_unclassified	Dinophyceae_unclassified
OTU_423	0	0	0	0.000104125	3e-05	0	0	0	0	0	0	0	7.12e-05	6.17e-05	0.00017618	2.05e-05	1.75e-05	0	0	0	0	0	0	0	0	0	0	1.57e-05	0	0	0	0	0	1.74e-05	3.22e-05	0	1.87e-05	Eukaryota	Alveolata	Dinoflagellata	Syndiniales	Dino-Group-II	Dino-Group-II-Clade-5	Dino-Group-II-Clade-5_X_sp.
OTU_6727	0	0	0	0.000104125	0	4.05e-05	0	0	0	0	0	0	0	0	0	0	0	0	0	0	0	0	1.61e-05	0	0.000546754	0.00057163	0.00010401	0.000267056	7.76e-05	6.29e-05	0	0.000289038	0	1.74e-05	1.61e-05	1.7e-05	0	Eukaryota	Alveolata	Dinoflagellata	Dinophyceae	Gymnodiniales	Gymnodiniaceae	Gyrodinium_helveticum
OTU_109	0.000988823	0.00074194	0	0.000104125	0	0	0	2.52e-05	0	4.85e-05	8.36e-05	0	0	0	0	0	0	0	0.0016953	0.000159252	0.000475903	0.000136957	3.22e-05	2.86e-05	0	0	0	0	0	0	0	0	0	0	0	0	0	Eukaryota	Alveolata	Dinoflagellata	Dinophyceae	Prorocentrales	Prorocentraceae	Prorocentrum_sp.
OTU_2251	0.000509394	0.000607042	0	0.000104125	0	0	0	0	4.19e-05	0	2.79e-05	0	0	0	0	0	0	0	0	0	0	0	0	0	0	0	0	0	0	0	0	0	0	0	0	0	0	Eukaryota	Eukaryota_unclassified	Eukaryota_unclassified	Eukaryota_unclassified	Eukaryota_unclassified	Eukaryota_unclassified	Eukaryota_unclassified
OTU_14545	0.000509394	0.000112415	0	0.000104125	0	0	0	0	0.000223717	0.000412601	0.00022281	0	0	0	0	0	0	0	0	0.000130297	0	0	0	0	0	0	0	0	0	0	0	0	0	0	0	0	0	Eukaryota	Stramenopiles	Ochrophyta	Ochrophyta_unclassified	Ochrophyta_unclassified	Ochrophyta_unclassified	Ochrophyta_unclassified
OTU_11615	0	0	0.000301708	8.68e-05	0.00017984	0	0	0	0	0	0	0	1.42e-05	0	0	0	0	0	0	0	0	0	0	0	0	3.36e-05	3.47e-05	1.57e-05	0	6.29e-05	5.54e-05	0.000108389	0	0.000104659	6.45e-05	0	0	Eukaryota	Alveolata	Ciliophora	Spirotrichea	Strombidiida	Strombidiida_unclassified	Strombidiida_unclassified
OTU_3334	0	0	0.000281594	8.68e-05	3e-05	2.43e-05	5.96e-05	0.00010074	0	0	0	0	5.7e-05	9.26e-05	0	2.05e-05	0	0	0	0	0	0	0	0	1.37e-05	0.000134501	0.000156014	4.71e-05	1.55e-05	0.000167715	5.54e-05	0.000415492	0	5.23e-05	4.84e-05	3.41e-05	5.61e-05	Eukaryota	Alveolata	Dinoflagellata	Dinophyceae	Peridiniales	Heterocapsaceae	Heterocapsa_unclassified
OTU_2898	0	0	0.00026148	8.68e-05	0	2.43e-05	0	0	0	0	0	0	0	0	0	0	0	0	0	0	0	0	0	0	0.00035539	0.000285815	0.000173349	0.000471276	0.000108574	8.39e-05	0.000110846	0.000108389	2.21e-05	0.000104659	9.67e-05	0.000119277	0	Eukaryota	Alveolata	Ciliophora	Spirotrichea	Strombidiida	Strombidiida_unclassified	Strombidiida_unclassified
OTU_2043	0	0	0.000241366	8.68e-05	0.000779306	0.000380662	5.96e-05	5.04e-05	0	0	2.79e-05	9.22e-05	4.27e-05	0.000169727	0.000264271	2.05e-05	0.000122241	0.000123909	0	0	0	0	1.61e-05	0.000100229	0.000177695	3.36e-05	0.000173349	9.43e-05	0.000139595	0.000524109	0.000277116	0.000361298	0.000132679	0.000209318	0.000274039	0.000425989	0.000187003	Eukaryota	Archaeplastida	Chlorophyta	Mamiellophyceae	Mamiellales	Bathycoccaceae	Bathycoccus_prasinos
OTU_2406	0	0	0.000221252	8.68e-05	8.99e-05	1.62e-05	0	0	0	0	0	0	0	0	0	0	0	0	0	0	0	0	0	0	0	1.68e-05	1.73e-05	0	0	4.19e-05	0	7.23e-05	2.21e-05	6.98e-05	3.22e-05	3.41e-05	0	Eukaryota	Alveolata	Ciliophora	Spirotrichea	Strombidiida	Strombidiidae_R	Strombidium_R_unclassified
OTU_3795	0	0	0.000201138	8.68e-05	0	0	0	0	0	0	0	2.31e-05	0	0	0	0	1.75e-05	0	0	0	0	0	0	0	5.47e-05	8.41e-05	8.67e-05	0.000109964	0.000124085	4.19e-05	8.31e-05	3.61e-05	2.21e-05	3.49e-05	0	1.7e-05	0	Eukaryota	Alveolata	Ciliophora	Spirotrichea	Strombidiida	Strombidiidae_R	Strombidium_R_unclassified
OTU_16249	0	0	0.000201138	8.68e-05	8.99e-05	0.00070463	0	0	0	0	0	2.31e-05	7.12e-05	3.09e-05	1.76e-05	4.1e-05	0	0	0	0	0	0	0	0	0	0	0	0	0	0	0	0	0	0	0	1.7e-05	0	Eukaryota	Stramenopiles	Ochrophyta	Bacillariophyta	Bacillariophyta_X	Polar-centric-Mediophyceae	Chaetoceros_unclassified
OTU_90	0.00146825	0.00388956	0.000201138	8.68e-05	0	0	0	0	2.8e-05	0.000242707	0	0	0	0	0	0	0	0	0	0	0	0	0	0	0	0	0	0	0	0	0	0	0	0	0	0	0	Eukaryota	Stramenopiles	Ochrophyta	Chrysophyceae	Chrysophyceae_X	Chrysophyceae_X_unclassified	Chrysophyceae_X_unclassified
OTU_6509	0	0	0.000181025	8.68e-05	0	4.05e-05	0	0	0	0	0	6.92e-05	4.27e-05	0	0	0	1.75e-05	0	0	0	0	0	1.61e-05	0	0.000191364	3.36e-05	0.00010401	0.000172801	0.000186127	0.000209644	0.000277116	1.81e-05	0.000110566	1.74e-05	0.000145079	6.82e-05	5.61e-05	Eukaryota	Alveolata	Ciliophora	Spirotrichea	Strombidiida	Strombidiidae_R	Strombidium_R_unclassified
OTU_3845	0	0	0.000160911	8.68e-05	0.00167851	0.00071273	0.000158863	0.000151111	0	0	0	2.31e-05	0.000170899	9.26e-05	5.29e-05	6.15e-05	5.24e-05	8.85e-05	0	0	0	0	0	0	2.73e-05	1.68e-05	0.000416038	3.14e-05	0.000108574	0.000251572	0.000221693	0.000632271	0.000309584	0.000296534	0.000193439	0.000323751	0.000243104	Eukaryota	Archaeplastida	Chlorophyta	Mamiellophyceae	Mamiellales	Bathycoccaceae	Bathycoccus_prasinos
OTU_6171	0	0	0.000160911	8.68e-05	0.00026976	0.00109339	0	0	0	0	0	0.000115271	2.85e-05	1.54e-05	0	0	0	1.77e-05	0	0	0	0	0	0	0	0	1.73e-05	0	0	0	0	0	0	1.74e-05	0	0	0	Eukaryota	Alveolata	Dinoflagellata	Dinophyceae	Dinophyceae_unclassified	Dinophyceae_unclassified	Dinophyceae_unclassified
OTU_1520	0	4.5e-05	0.000140797	8.68e-05	0.000569493	0.000534547	0.000198578	0.000151111	0	0	0.0010305	0.00117577	0.00168051	0.00145039	0.00338266	0.00135312	0.00461023	0.00233657	0	1.45e-05	0	1.96e-05	0.000144757	8.59e-05	0.000533085	0.000235377	0.00126545	0.000361311	0.00117881	0.00469602	0.00135787	0.0016981	0.00700986	0.00261648	0.00620617	0.00332271	0.00377747	Eukaryota	Archaeplastida	Chlorophyta	Mamiellophyceae	Mamiellales	Mamiellaceae	Micromonas_unclassified
OTU_678	0.000119857	0.00103422	0.000140797	8.68e-05	0	0	0	0	0	0	2.79e-05	0	0	0	0	0	0	0	0	0	1.83e-05	0	0	0	0	0	0	0	0	0	0	0	0	0	0	0	0	Eukaryota	Opisthokonta	Choanoflagellida	Choanoflagellatea	Choanoflagellatea_X	Choanoflagellatea_X_Group_L	Choanoflagellatea_X_Group_L_X_sp.
OTU_6763	0	0	0.000140797	8.68e-05	0.000149867	0.000137686	0	0	0	0	2.79e-05	0	4.27e-05	0	0	0	0	0	0	0	0	0	0	0	0	1.68e-05	0	0	0	4.19e-05	2.77e-05	1.81e-05	0	6.98e-05	4.84e-05	0	0	Eukaryota	Alveolata	Ciliophora	Spirotrichea	Spirotrichea_unclassified	Spirotrichea_unclassified	Spirotrichea_unclassified
OTU_2985	0.000779073	0.000472144	0.000140797	8.68e-05	0	0	0	0	0.000153805	0.000631037	0	0	0	0	0	0	0	0	0	0.00160699	0	0	0	0	0	0	0	0	0	0	0	0	0	0	0	0	0	Eukaryota	Alveolata	Ciliophora	Spirotrichea	Choreotrichida	Strobilidiidae_C	Strobilidiidae_C_X_sp.
OTU_6661	0	0	0.000140797	8.68e-05	0.000149867	4.86e-05	1.99e-05	0	0	0	5.57e-05	4.61e-05	0.000213623	9.26e-05	0	8.2e-05	1.75e-05	0.000123909	0	0	0	0	0	0	0	3.36e-05	5.2e-05	3.14e-05	1.55e-05	8.39e-05	0.000138558	9.03e-05	6.63e-05	1.74e-05	1.61e-05	0	7.48e-05	Eukaryota	Alveolata	Dinoflagellata	Dinophyceae	Gymnodiniales	Gymnodiniaceae	Gymnodiniaceae_unclassified
OTU_8623	0	0	0.000120683	8.68e-05	0	4.05e-05	0	0	0	0	0	0	0	1.54e-05	0	0	0	0	0	0	0	0	0	0	9.57e-05	8.41e-05	0.000121344	4.71e-05	3.1e-05	0	8.31e-05	1.81e-05	2.21e-05	6.98e-05	0	5.11e-05	0	Eukaryota	Alveolata	Alveolata_unclassified	Alveolata_unclassified	Alveolata_unclassified	Alveolata_unclassified	Alveolata_unclassified
OTU_2471	0	0	0.000120683	8.68e-05	0.00101909	0.00143356	5.96e-05	0.000125926	0	0	0	4.61e-05	1.42e-05	6.17e-05	0.000123326	0.000123011	6.99e-05	3.54e-05	0	0	0	0	0	0	0	3.36e-05	0.00010401	4.71e-05	0.000201638	8.39e-05	0.000332539	0.000108389	4.42e-05	0.000348864	1.61e-05	0.000306712	0.000149603	Eukaryota	Opisthokonta	Choanoflagellida	Choanoflagellatea	Acanthoecida	Stephanoecidae_Group_D	Stephanoecidae_Group_D_X_sp.
OTU_1576	0	0	0.000120683	8.68e-05	0	8.91e-05	0	0.000201481	0	0	0.000501323	4.61e-05	0	0	0	0	0	1.77e-05	0	0	0	0	1.61e-05	0	0	0	5.2e-05	0.000157092	1.55e-05	0	0	0	0	8.72e-05	1.61e-05	0	0	Eukaryota	Alveolata	Ciliophora	Litostomatea	Haptoria_4	Didiniidae	Didiniidae_X_sp.
OTU_10982	0	0	0.000120683	8.68e-05	0	1.62e-05	0	0	0	0	0	0	0	0	0	2.05e-05	0	0	0	0	0	0	0	0	5.47e-05	0.000100876	6.93e-05	0.000157092	7.76e-05	2.1e-05	0	3.61e-05	0	0	1.61e-05	1.7e-05	0	Eukaryota	Alveolata	Ciliophora	Spirotrichea	Strombidiida	Strombidiidae_R	Strombidium_R_unclassified
OTU_4061	0	0	0.000120683	8.68e-05	0.000839253	0.000291571	0	2.52e-05	0	0	0	0	1.42e-05	0	0	2.05e-05	0	5.31e-05	0	0	0	0	0	0	0	0	0	0	0	2.1e-05	0	0	4.42e-05	0	0	0	0	Eukaryota	Hacrobia	Cryptophyta	Cryptophyceae	Cryptophyceae_X	Cryptomonadales	Teleaulax_amphioxeia
OTU_21258	0	0	0.000120683	8.68e-05	3e-05	1.62e-05	0.000953175	0.000478517	0	0	0	2.31e-05	7.12e-05	0.000138867	1.76e-05	0.000307528	0.000314334	0.000106208	0	1.45e-05	1.83e-05	0	0	0	4.1e-05	5.04e-05	0.000138679	3.14e-05	3.1e-05	6.29e-05	2.77e-05	0.000180649	2.21e-05	0.000261648	9.67e-05	0.000255593	9.35e-05	Eukaryota	Alveolata	Dinoflagellata	Dinophyceae	Gymnodiniales	Gymnodiniaceae	Gymnodiniaceae_unclassified
OTU_1977	0	0	0.000120683	8.68e-05	0	0.000194381	5.96e-05	2.52e-05	0	0	0	0	8.54e-05	7.71e-05	1.76e-05	0.000205019	3.49e-05	0	0	0	0	0	0	0	0	0	0	0	1.55e-05	0	2.77e-05	0	0	1.74e-05	0	0	0.000112202	Eukaryota	Alveolata	Dinoflagellata	Dinophyceae	Peridiniales	Protoperidiniaceae	Protoperidinium_sp.
OTU_2242	0	0	0.000120683	8.68e-05	0.00290741	0.00230017	1.99e-05	7.56e-05	0	0	0	6.92e-05	0.00234986	0.00296251	3.52e-05	0.000984091	0.000261945	0	0	0	3.66e-05	0	0	0	0	0.000100876	1.73e-05	0	0	4.19e-05	2.77e-05	5.42e-05	0	6.98e-05	0	3.41e-05	0	Eukaryota	Eukaryota_unclassified	Eukaryota_unclassified	Eukaryota_unclassified	Eukaryota_unclassified	Eukaryota_unclassified	Eukaryota_unclassified
OTU_3728	0	0	0.000120683	8.68e-05	0.000659413	0.000242976	3.97e-05	7.56e-05	0	0	0.000167108	0.000230542	0.000840252	0.00101836	0.00170895	0.0021732	0.00172883	0.00026552	0	0	0	0	0	0	2.73e-05	3.36e-05	8.67e-05	4.71e-05	9.31e-05	0.000167715	0.000193981	0.000144519	0.000420149	0.000296534	0.000306279	0.000647503	0.000130902	Eukaryota	Hacrobia	Haptophyta	Prymnesiophyceae	Prymnesiales	Chrysochromulinaceae	Chrysochromulina_unclassified
OTU_2304	0.00104875	0.000674491	0.000120683	8.68e-05	0	0	0	0	4.19e-05	0.00162613	0	2.31e-05	1.42e-05	0	0	0	0	0	0.000130408	0	0.000420991	0.000215218	3.22e-05	0	4.1e-05	0	0	0	1.55e-05	0	2.77e-05	0	0	0	0	0	0	Eukaryota	Stramenopiles	Ochrophyta	Bolidophyceae	Parmales	Parmales_X	Parmales_XX_sp.
OTU_5710	0.000269679	8.99e-05	0.000120683	8.68e-05	0	0	0	0	0	4.85e-05	0	0	0	0	0	0	0	0	0	0	1.83e-05	0	0	0	0	0	0	0	0	0	0	0	0	0	0	0	0	Eukaryota	Stramenopiles	Ochrophyta	Chrysophyceae	Chrysophyceae_X	Chrysophyceae_Clade-C	Dinobryon_crenulatum
OTU_3892	0	0	0.000100569	8.68e-05	0.000419627	0.000251075	0.00017872	7.56e-05	0	0	0.000250661	0.000553301	0.000854494	0.0011418	0.000369979	0.0011071	0.00130972	0.000619546	0	0	0	1.96e-05	0	0	4.1e-05	0.000117689	0.000953421	6.28e-05	0.000217149	0.000587002	0.000803636	0.0010297	0.00152581	0.00150011	0.00167647	0.00161876	0.00172043	Eukaryota	Archaeplastida	Chlorophyta	Mamiellophyceae	Mamiellales	Mamiellaceae	Micromonas_unclassified
OTU_4158	0	0	0.000100569	8.68e-05	0.00026976	0.000121488	5.96e-05	2.52e-05	0	0	0	2.31e-05	0	0	0	0	0	0	0	0	0	0	0	0	2.73e-05	1.68e-05	0	1.57e-05	3.1e-05	0	0	0.000252908	0	8.72e-05	0	0.000170395	3.74e-05	Eukaryota	Alveolata	Dinoflagellata	Dinophyceae	Gymnodiniales	Gymnodiniaceae	Gyrodinium_helveticum
OTU_3756	0	0	0.000100569	8.68e-05	0	2.43e-05	7.94e-05	0	0	0	5.57e-05	0.000299705	0.000256348	9.26e-05	5.29e-05	0.000102509	0.000139704	8.85e-05	0	0	0	0	0	0	0	1.68e-05	0	9.43e-05	3.1e-05	2.1e-05	2.77e-05	5.42e-05	4.42e-05	8.72e-05	4.84e-05	0.000119277	0.000280505	Eukaryota	Alveolata	Dinoflagellata	Dinophyceae	Peridiniales	Protoperidiniaceae	Protoperidinium_bipes
OTU_119	0.00332604	0.00334997	0.000100569	8.68e-05	0	0	0	0	8.39e-05	0.00128634	0.000779836	0	0	0	5.29e-05	0	0	0	0	1.45e-05	0.000658942	0	0	0	1.37e-05	0	0	0	0	0	0	0	0	0	0	0	0	Eukaryota	Alveolata	Dinoflagellata	Dinophyceae	Dinophyceae_unclassified	Dinophyceae_unclassified	Dinophyceae_unclassified
OTU_5797	0.000329608	2.25e-05	0.000100569	8.68e-05	0	0	0	0	5.59e-05	0.000242707	0	0	0	0	0	0	0	0	0	7.24e-05	0	0	0	0	0	0	0	0	0	0	0	0	0	0	0	0	0	Eukaryota	Stramenopiles	Ochrophyta	Chrysophyceae	Chrysophyceae_X	Chrysophyceae_XX	Chrysophyceae_XXX_sp.
OTU_6270	0	0	8.05e-05	8.68e-05	8.99e-05	2.43e-05	1.99e-05	5.04e-05	0	0	0	4.61e-05	0	0	0	2.05e-05	0	1.77e-05	0	0	0	0	0	0	0.000218702	0.000269003	0.000208019	0.000298475	0	6.29e-05	5.54e-05	9.03e-05	0	0.000104659	4.84e-05	0.000136316	1.87e-05	Eukaryota	Alveolata	Alveolata_unclassified	Alveolata_unclassified	Alveolata_unclassified	Alveolata_unclassified	Alveolata_unclassified
OTU_3925	0	0	8.05e-05	8.68e-05	0.00035968	0.000259174	0.00276024	0.00178814	0	0	0	0.00016138	8.54e-05	0.000262305	0	0.000123011	0	1.77e-05	0	0	0	0	0	0	0	1.68e-05	0.00010401	7.85e-05	0.000325723	2.1e-05	0.000166269	0.000939374	0	0.00156989	0.000257919	0.00100533	0.000635811	Eukaryota	Alveolata	Ciliophora	Spirotrichea	Strombidiida	Strombidiidae_M	Strombidiidae_M_unclassified
OTU_2232	0	0	8.05e-05	8.68e-05	0.000209813	0.000113389	3.97e-05	0	0	0	0.000612728	9.22e-05	5.7e-05	1.54e-05	0	0	0	1.77e-05	0	0	0	0	4.83e-05	0	0	0	0.000190684	4.71e-05	0	8.39e-05	0	5.42e-05	0.000110566	0.000313977	0.000128959	3.41e-05	0	Eukaryota	Alveolata	Ciliophora	Litostomatea	Haptoria_4	Didiniidae	Didiniidae_X_sp.
OTU_846	0	0	8.05e-05	8.68e-05	0.00113899	0.000890912	0.000675166	0.000528887	0	0	0	4.61e-05	2.85e-05	0.000246875	0	0.000102509	3.49e-05	0	0	0	0	0	0	0	0	0.000134501	8.67e-05	0.000109964	7.76e-05	2.1e-05	0.000138558	0.000270973	0.000110566	0.000174432	0.000145079	0.00037487	0.000411407	Eukaryota	Alveolata	Dinoflagellata	Dinophyceae	Gymnodiniales	Gymnodiniaceae	Gymnodiniaceae_unclassified
OTU_918	0	0	8.05e-05	8.68e-05	0.000929173	0.000591242	0.000198578	0.000151111	0	0	0	0.000184434	5.7e-05	0.000185157	0	0.000799574	0.000855686	0.000902767	0	0	0	1.96e-05	0	0	0.00012302	0.000117689	0.000346699	0.000345602	0.000232659	0.000461216	0.000221693	0.0016439	0.000132679	0.0016571	0.00011284	0.00114165	0.000130902	Eukaryota	Alveolata	Dinoflagellata	Dinophyceae	Gymnodiniales	Gymnodiniaceae	Gyrodinium_helveticum
OTU_1490	0	0	8.05e-05	8.68e-05	0.000599466	0.000388762	0	0	0	0	0	0	8.54e-05	7.71e-05	0	0	0	0	0	0	0	0	0	0	0	0	0	0	0	0	0	0	0	0	0	0	0	Eukaryota	Alveolata	Dinoflagellata	Dinophyceae	Dinophyceae_unclassified	Dinophyceae_unclassified	Dinophyceae_unclassified
OTU_2986	0	0	8.05e-05	8.68e-05	0	4.05e-05	0	0	0	0	0	6.92e-05	0.000170899	4.63e-05	5.29e-05	2.05e-05	0	0	0	0	0	0	0	0	0	0	0	0	0	0	0	0	0	0	0	0	0	Eukaryota	Alveolata	Dinoflagellata	Syndiniales	Dino-Group-II	Dino-Group-II-Clade-26	Dino-Group-II-Clade-26_X_sp.
OTU_6288	0.000269679	0.000112415	8.05e-05	8.68e-05	0	0	0	0	0	0	0.000111405	4.61e-05	0	0	0	0	0	0	3.26e-05	1.45e-05	0.000146432	1.96e-05	0	0	0	0	0	0	0	0	0	0	0	0	0	0	0	Eukaryota	Hacrobia	Katablepharidophyta	Katablepharidaceae	Katablepharidales	Katablepharidales_X	Katablepharidales_XX_sp.
OTU_38	0.00197765	0.00123657	8.05e-05	8.68e-05	0	0	0	0	0.000167788	0.00157759	0.0032029	0.000322759	1.42e-05	0	0	0	0	0	0.00016301	0.000188207	0.000219647	1.96e-05	0	0	0	0	0	0	0	0	0	0	0	0	0	0	0	Eukaryota	Stramenopiles	Ochrophyta	Chrysophyceae	Chrysophyceae_X	Chrysophyceae_Clade-F	Chrysophyceae_Clade-F_X_sp.
OTU_2382	0.000359572	0.000134898	8.05e-05	8.68e-05	0	0	0	0	0.000195752	0.000412601	0.000167108	0	0	3.09e-05	1.76e-05	0	0	0	0	0.000101342	0	0	0	0	0	0	0	0	0	0	0	0	0	0	0	0	0	Eukaryota	Stramenopiles	Ochrophyta	Chrysophyceae	Chrysophyceae_X	Chrysophyceae_Clade-C	Chrysophyceae_Clade-C_unclassified
OTU_2192	0	0	6.03e-05	8.68e-05	3e-05	0	0	0	0	0	0	0	0	0	0	0	0	0	0	0	0	0	0	0	4.1e-05	0	1.73e-05	6.28e-05	3.1e-05	0	0	1.81e-05	0	0	0	0	0	Eukaryota	Alveolata	Ciliophora	CONThreeP	CONThreeP_X	Urotrichidae	Urotricha_sp.
OTU_11478	0	0	6.03e-05	8.68e-05	0	8.1e-06	0	0	0	0	0	0	0	0	0	0	0	0	0	0	0	0	0	0	0	0	0	0	0	6.29e-05	8.31e-05	0.000108389	0	0.000104659	3.22e-05	1.7e-05	0	Eukaryota	Alveolata	Ciliophora	Spirotrichea	Strombidiida	Strombidiidae_R	Strombidium_R_unclassified
OTU_2080	0	0	6.03e-05	8.68e-05	0.000299733	0.000194381	0.000575877	0.000528887	0	0	0	0.000138325	4.27e-05	0.000138867	1.76e-05	0.000164015	0.00017463	0.00026552	0	0	0	0	0	0	4.1e-05	0.000302628	0.000208019	6.28e-05	0.000325723	0.000188679	0.000249404	0.000379363	0.000287471	0.00071517	0.000564198	0.000800859	0.000336606	Eukaryota	Alveolata	Dinoflagellata	Dinophyceae	Dinophyceae_unclassified	Dinophyceae_unclassified	Dinophyceae_unclassified
OTU_5314	0	0	6.03e-05	8.68e-05	3e-05	8.91e-05	5.96e-05	7.56e-05	0	0	0	0	0	1.54e-05	0	0	0	0	0	0	0	0	0	0	0	3.36e-05	8.67e-05	0.000125674	7.76e-05	0	0	0	0	6.98e-05	0	6.82e-05	0	Eukaryota	Alveolata	Dinoflagellata	Dinophyceae	Torodiniales	Torodiniaceae	Torodinium_robustum
OTU_5877	0	0	6.03e-05	8.68e-05	0	0.000153885	0	0	0	0	0	0	0.000142416	0.000123438	5.29e-05	0.000102509	0	0	0	0	0	0	0	0	0	0	1.73e-05	0	1.55e-05	0	0	0	0	0	0	1.7e-05	0	Eukaryota	Alveolata	Dinoflagellata	Dinophyceae	Peridiniales	Peridiniales_unclassified	Peridiniales_unclassified
OTU_3483	0.000868966	0.00125905	6.03e-05	8.68e-05	0	0	0	0	0.00274053	0.00451434	0	0	1.42e-05	1.54e-05	0	0	0	0	0	0.000101342	1.83e-05	0	0	0	0	0	0	0	0	0	0	0	0	0	0	0	0	Eukaryota	Alveolata	Dinoflagellata	Dinophyceae	Dinophyceae_unclassified	Dinophyceae_unclassified	Dinophyceae_unclassified
OTU_769	0.00973841	0.00737443	6.03e-05	8.68e-05	0	0	0	0	0	0	0	0	0	0	0	0	0	0	0	0	0	0	0	0	0	0	0	0	0	0	0	0	0	0	0	0	0	Eukaryota	Alveolata	Dinoflagellata	Dinophyceae	Dinophyceae_unclassified	Dinophyceae_unclassified	Dinophyceae_unclassified
OTU_1709	0.000449465	0.000314762	6.03e-05	8.68e-05	0	0	0	0	0	2.43e-05	0	0	0	0	0	0	0	0	0	2.9e-05	0	0	0	0	0	0	0	0	0	0	0	0	0	0	0	0	0	Eukaryota	Stramenopiles	Ochrophyta	Chrysophyceae	Chrysophyceae_X	Chrysophyceae_X_unclassified	Chrysophyceae_X_unclassified
OTU_1319	0.000958859	0.000786906	6.03e-05	8.68e-05	0	0	0	0	0	0	0	0	0	0	0	0	0	0	0	0	0	0	0	0	0	0	0	0	0	0	0	0	0	0	0	0	0	Eukaryota	Opisthokonta	Opisthokonta_unclassified	Opisthokonta_unclassified	Opisthokonta_unclassified	Opisthokonta_unclassified	Opisthokonta_unclassified
OTU_22866	0	0	6.03e-05	8.68e-05	0.000749333	0.000161984	0.000695024	0.00105777	0	0	2.79e-05	0.000138325	0.00072632	0.000925783	0.00112755	0.000861079	0.0015542	8.85e-05	0	0	0	0	0	0	0	0	1.73e-05	0	1.55e-05	0	0	1.81e-05	0.000154792	6.98e-05	0.000161199	0.000102237	0.000168303	Eukaryota	Hacrobia	Picozoa	Picozoa_X	Picozoa_XX	Picozoa_XXX	Picozoa_XXXX_sp.
OTU_5964	0	0	4.02e-05	8.68e-05	0.00017984	0.000113389	0	5.04e-05	0	0	0	0	1.42e-05	0	0	0	0	0	0	0	0	0	0	0	0	0	0	0	0	0	0	0.000108389	0	6.98e-05	0	0	0	Eukaryota	Alveolata	Alveolata_unclassified	Alveolata_unclassified	Alveolata_unclassified	Alveolata_unclassified	Alveolata_unclassified
OTU_9490	0	0	4.02e-05	8.68e-05	0	8.91e-05	0	0	0	0	0	0	2.85e-05	1.54e-05	0	0	0	0	0	0	0	0	0	0	0	1.68e-05	0	0	0	0	5.54e-05	3.61e-05	0	8.72e-05	0	3.41e-05	1.87e-05	Eukaryota	Alveolata	Alveolata_unclassified	Alveolata_unclassified	Alveolata_unclassified	Alveolata_unclassified	Alveolata_unclassified
OTU_9981	0	0	4.02e-05	8.68e-05	0	0	0	0	0	0	0	4.61e-05	4.27e-05	4.63e-05	0	2.05e-05	0	0	0	0	0	0	0	0	0	3.36e-05	0	0	0	0	0	0	0	1.74e-05	0	1.7e-05	0	Eukaryota	Alveolata	Alveolata_unclassified	Alveolata_unclassified	Alveolata_unclassified	Alveolata_unclassified	Alveolata_unclassified
OTU_3857	0	0	4.02e-05	8.68e-05	0	4.05e-05	0	0	0	0	0	0	4.27e-05	9.26e-05	1.76e-05	0	0	0	0	0	0	0	0	0	0	0	0	0	0	0	0	0.000198714	0	0.000122102	0	5.11e-05	0	Eukaryota	Alveolata	Ciliophora	Spirotrichea	Strombidiida_H	Strombidiida_H_X	Strombidiida_H_XX_sp.
OTU_6591	0	0	4.02e-05	8.68e-05	0	8.1e-06	0	0	0	0	0	0	1.42e-05	6.17e-05	0	0	3.49e-05	0.000106208	0	0	0	0	0	0	4.1e-05	0.00031944	0.000277359	0.000219929	9.31e-05	0.000104822	0.000332539	7.23e-05	0.000154792	0.000104659	8.06e-05	0.000102237	5.61e-05	Eukaryota	Alveolata	Ciliophora	Spirotrichea	Strombidiida	Strombidiidae_R	Strombidium_R_unclassified
OTU_2416	0	0	4.02e-05	8.68e-05	0.000209813	0.000429258	0.000139005	0.00010074	0	0	0	4.61e-05	1.42e-05	0.000123438	0	0.000348532	3.49e-05	1.77e-05	0	0	0	0	0	0	0	1.68e-05	0	0	4.65e-05	0	2.77e-05	1.81e-05	0	6.98e-05	0	3.41e-05	0	Eukaryota	Alveolata	Dinoflagellata	Dinophyceae	Prorocentrales	Prorocentraceae	Prorocentrum_sp.
OTU_21580	0	0	4.02e-05	8.68e-05	8.99e-05	2.43e-05	0	0	0	0	0	0	0	3.09e-05	0	6.15e-05	1.75e-05	3.54e-05	0	0	0	0	0	0	4.1e-05	0.000117689	3.47e-05	0.000172801	3.1e-05	0.000188679	5.54e-05	0.000289038	0	5.23e-05	0	8.52e-05	0	Eukaryota	Alveolata	Dinoflagellata	Dinophyceae	Dinophyceae_unclassified	Dinophyceae_unclassified	Dinophyceae_unclassified
OTU_21161	0	2.25e-05	4.02e-05	8.68e-05	0	8.91e-05	7.94e-05	0.00010074	0	0	0	0	0	0	0	2.05e-05	0	0	0	0	0	0	3.22e-05	0	0	1.68e-05	1.73e-05	0	0	0	2.77e-05	0	0	5.23e-05	0	3.41e-05	0	Eukaryota	Alveolata	Dinoflagellata	Dinophyceae	Dinophyceae_unclassified	Dinophyceae_unclassified	Dinophyceae_unclassified
OTU_707	0.00197765	0.00222582	4.02e-05	8.68e-05	0	0	0	0	0.000111858	0.000291248	0	0	0	1.54e-05	0	0	0	0	0	0	0	0	0	0	0	0	0	0	0	0	0	0	0	0	0	0	0	Eukaryota	Alveolata	Dinoflagellata	Dinophyceae	Dinophyceae_unclassified	Dinophyceae_unclassified	Dinophyceae_unclassified
OTU_2111	0.000479429	0.000359728	4.02e-05	8.68e-05	0	0	0	0	0	0	0	0	0	0	0	0	0	0	0	0	0	0	0	0	0	0	0	0	0	0	0	0	0	0	0	0	0	Eukaryota	Stramenopiles	Ochrophyta	Chrysophyceae	Chrysophyceae_X	Chrysophyceae_Clade-C	Chrysophyceae_Clade-C_X_sp.
OTU_3717	0.000179786	0.000112415	4.02e-05	8.68e-05	0	0	0	0	0	0	0	0	0	0	0	0	0	0	0	0	0	0	0	0	0	0	0	0	0	0	0	0	0	0	0	0	0	Eukaryota	Stramenopiles	Ochrophyta	Chrysophyceae	Chrysophyceae_X	Chrysophyceae_X_unclassified	Chrysophyceae_X_unclassified
OTU_19327	0	0	2.01e-05	8.68e-05	0.00107904	0.00137686	3.97e-05	2.52e-05	0	0	0	4.61e-05	2.85e-05	0	0.000246653	0.000164015	0.000122241	5.31e-05	0	0	0	0	0	0	1.37e-05	3.36e-05	0.000225354	3.14e-05	0.000310212	0.000167715	0.000332539	0.000108389	0.000132679	0.000296534	6.45e-05	0.000204475	0.000187003	Eukaryota	Opisthokonta	Choanoflagellida	Choanoflagellatea	Acanthoecida	Stephanoecidae_Group_D	Stephanoecidae_Group_D_X_sp.
OTU_788	0	0	2.01e-05	8.68e-05	0.00035968	0.000323968	0.00472616	0.00264444	0	0	0.000167108	0.000322759	0.000313314	0.000308594	0.00276603	0.00120961	0.00578025	0.00938169	0	0	1.83e-05	0	1.61e-05	0	6.83e-05	0.000453942	0.00116144	0.000408439	0.00128738	0.00142558	0.00304827	0.00171616	0.0010172	0.00313977	0.000644797	0.00253889	0.000748013	Eukaryota	Opisthokonta	Choanoflagellida	Choanoflagellatea	Acanthoecida	Stephanoecidae_Group_D	Stephanoecidae_Group_D_X_sp.
OTU_2516	0	0	2.01e-05	8.68e-05	0.000209813	0.000153885	0	0	0	0	0	0	0	1.54e-05	0	0	0	0	0	0	0	0	0	0	0	1.68e-05	0	0	0	0	5.54e-05	0.000343233	0	0.000104659	0	0	0	Eukaryota	Alveolata	Ciliophora	Spirotrichea	Spirotrichea_unclassified	Spirotrichea_unclassified	Spirotrichea_unclassified
OTU_12992	0	0	2.01e-05	8.68e-05	3e-05	2.43e-05	0	0	0	0	2.79e-05	0.000207488	0.000284831	0.000262305	0	4.1e-05	0	0	0	0	0	0	0	0	0	0	0	0	0	0.000125786	0	9.03e-05	2.21e-05	0.000191875	0	0	0	Eukaryota	Alveolata	Ciliophora	Spirotrichea	Strombidiida	Tontoniidae_A	Laboea_strobila
OTU_1181	0	0	2.01e-05	8.68e-05	0	1.62e-05	1.99e-05	2.52e-05	0	0	0	0.000184434	0	0	0	0	0	1.77e-05	0	0	0	0	0	0	0.00012302	0.00031944	0.000589388	4.71e-05	0.000108574	0.000125786	5.54e-05	1.81e-05	0.000132679	0.000296534	0.000386878	0.000153356	0.000168303	Eukaryota	Alveolata	Ciliophora	Spirotrichea	Strombidiida	Strombidiida_unclassified	Strombidiida_unclassified
OTU_10676	0	0	2.01e-05	8.68e-05	0	8.1e-06	0	0	0	0	0	2.31e-05	2.85e-05	4.63e-05	0	0	0	0	0	0	0	0	0	0	0	0	0	0	0	0	0	0.000108389	0	0.000139545	0	0	0	Eukaryota	Alveolata	Ciliophora	Spirotrichea	Strombidiida	Tontoniidae_A	Spirotontonia_unclassified
OTU_120	0.000509394	0.000764423	2.01e-05	8.68e-05	0	0	0	0	0.00103469	0.00339789	0	0	0	0	0	0	0	0	0.000195612	0.00163595	0.000128128	3.91e-05	0	0	0	0	0	0	0	0	0	0	0	0	0	0	0	Eukaryota	Alveolata	Ciliophora	CONTH_4	CONTH_4_X	CONTH_4_XX	CONTH_4_XXX_sp.
OTU_5862	0	0	2.01e-05	8.68e-05	0.00017984	8.91e-05	0	0	0	0	0	0	0	0	1.76e-05	0	0	1.77e-05	0	0	0	0	0	0	0	0	0	0	0	0	0	0	0	0	0	0	1.87e-05	Eukaryota	Hacrobia	Cryptophyta	Cryptophyceae	Cryptophyceae_X	Cryptomonadales	Teleaulax_amphioxeia
OTU_21535	0	0	2.01e-05	8.68e-05	5.99e-05	7.29e-05	0.000417014	0.000428147	0	0	0	0	4.27e-05	6.17e-05	3.52e-05	8.2e-05	0.000157167	0	0	0	0	0	0	0	0	0.000100876	0	3.14e-05	1.55e-05	4.19e-05	5.54e-05	1.81e-05	0	5.23e-05	1.61e-05	6.82e-05	0	Eukaryota	Alveolata	Dinoflagellata	Dinophyceae	Torodiniales	Torodiniaceae	Torodinium_robustum
OTU_4870	0	0	2.01e-05	8.68e-05	3e-05	1.62e-05	1.99e-05	2.52e-05	0	0	0	0	0	0	0	0	0	0	0	0	0	0	0	0	2.73e-05	3.36e-05	1.73e-05	3.14e-05	0	8.39e-05	2.77e-05	3.61e-05	0	6.98e-05	6.45e-05	0.000102237	1.87e-05	Eukaryota	Alveolata	Dinoflagellata	Dinophyceae	Dinophyceae_unclassified	Dinophyceae_unclassified	Dinophyceae_unclassified
OTU_21661	0	0	2.01e-05	8.68e-05	0	8.91e-05	0	7.56e-05	0	0	0	0	0	0	0	2.05e-05	0	0	0	0	0	0	0	0	0	1.68e-05	0	1.57e-05	0	6.29e-05	0	0	0	6.98e-05	0	0	0	Eukaryota	Alveolata	Dinoflagellata	Dinophyceae	Gymnodiniales	Gymnodiniaceae	Gyrodinium_unclassified
OTU_1237	0.000449465	0.000494627	2.01e-05	8.68e-05	0	0	0	0	1.4e-05	0	0	0	0	0	0	0	0	0	0	0	0.000366079	0	0	0	0	0	0	0	0	0	0	0	0	0	0	0	0	Eukaryota	Eukaryota_unclassified	Eukaryota_unclassified	Eukaryota_unclassified	Eukaryota_unclassified	Eukaryota_unclassified	Eukaryota_unclassified
OTU_1816	0	0	2.01e-05	8.68e-05	0	0	0	5.04e-05	0	0	0	6.92e-05	1.42e-05	3.09e-05	0	0	0	0.000212416	0	0	0	0	6.43e-05	1.43e-05	4.1e-05	1.68e-05	3.47e-05	4.71e-05	4.65e-05	0	0.000110846	0	6.63e-05	1.74e-05	0.000128959	0	0	Eukaryota	Hacrobia	Katablepharidophyta	Katablepharidaceae	Katablepharidales	Katablepharidales_X	Katablepharidales_X_unclassified
OTU_555	0	0	2.01e-05	8.68e-05	0	4.05e-05	0.000436872	0.000226666	0	0	0.00044562	0.00172907	0.00394491	0.00421231	0.0112579	0.00360833	0.0164327	0.000566442	0	0	0	0	0	0	0.00060143	0.0043881	0.00608456	0.0049484	0.00545973	0.00373166	0.00767611	0.00319748	0.00389191	0.00387239	0.00496494	0.00678174	0.00450678	Eukaryota	Hacrobia	Telonemia	Telonemia_X	Telonemia_XX	Telonemia-Group-1	Telonemia-Group-1_X_sp.
OTU_14423	0	0	0	8.68e-05	0	8.1e-06	0	5.04e-05	0	2.43e-05	0	2.31e-05	0.000612387	0.000216016	0.00135659	6.15e-05	0.000331797	0.000654948	0	0	0	0	0	0	0	3.36e-05	1.73e-05	9.43e-05	9.31e-05	6.29e-05	0	1.81e-05	0	0	0	1.7e-05	0	Eukaryota	Rhizaria	Cercozoa	Filosa-Thecofilosea	Cryomonadida	Cryothecomonas-lineage	Cryothecomonas_aestivalis
OTU_3031	0	0	0	8.68e-05	0.000149867	8.1e-05	0	0	0	0	0	0	0	6.17e-05	1.76e-05	6.15e-05	5.24e-05	0	0	0	0	0	0	0	0	0	1.73e-05	0	0	0	0	0	2.21e-05	0	0	0	0	Eukaryota	Archaeplastida	Chlorophyta	Pyramimonadales	Pyramimonadales_X	Pyramimonadales_XX	Pterosperma_unclassified
OTU_2854	0	0	0	8.68e-05	0.000119893	7.29e-05	1.99e-05	5.04e-05	0	0	0	4.61e-05	0	1.54e-05	0.000158562	8.2e-05	0.0004715	1.77e-05	0	0	0	0	0	0	0	0	0	0	0	0	0	0	0	0	0	1.7e-05	0	Eukaryota	Archaeplastida	Chlorophyta	Pyramimonadales	Pyramimonadales_X	Pyramimonadales_XX	Pterosperma_unclassified
OTU_5271	0	0.000157381	0	8.68e-05	0	0	0	0	6.99e-05	0	0.000167108	4.61e-05	2.85e-05	0	1.76e-05	0	0	0	0	0	0	0	0	0	0	0	0	0	0	0	0	0	0	0	0	0	0	Eukaryota	Archaeplastida	Chlorophyta	Chlorophyceae	Chlamydomonadales	Chlamydomonadales_X	Carteria_sp.
OTU_1494	0.000569323	8.99e-05	0	8.68e-05	0	0	0	0	0	0.00101937	0	0	0	0	1.76e-05	0	0	0	0	0	0	0	0	0	0	0	0	0	0	0	0	0	0	0	0	0	0	Eukaryota	Archaeplastida	Chlorophyta	Mamiellophyceae	Mamiellophyceae_unclassified	Mamiellophyceae_unclassified	Mamiellophyceae_unclassified
OTU_4190	0	0	0	8.68e-05	5.99e-05	0.000210579	0.00182692	0.00549035	0	0	0.000250661	0.000991332	0.000797528	0.00126524	3.52e-05	0.000102509	1.75e-05	0.00254899	0	0	1.83e-05	0.00254348	0.030576	0.00315006	0.00578193	0.0204946	0.00707265	0.00138241	0.00291599	0.00540881	0.0011916	0.00131874	0.00267569	0.000732614	0.00383654	0.00109053	0.00215054	Eukaryota	Alveolata	Ciliophora	Spirotrichea	Strombidiida_B	Strombidiida_B_X	Strombidiida_B_XX_sp.
OTU_3666	0	0	0	8.68e-05	5.99e-05	0	0	0	0	0	0	6.92e-05	0	0	0	2.05e-05	0	1.77e-05	0	0	0	0	0	0	0.000136689	0.000201752	3.47e-05	6.28e-05	0.000124085	8.39e-05	0.000138558	0	0	0.000261648	0.000322399	0.000698622	0.000112202	Eukaryota	Alveolata	Ciliophora	Spirotrichea	Strombidiida	Strombidiidae_R	Strombidium_R_unclassified
OTU_12989	8.99e-05	4.5e-05	0	8.68e-05	0	0	0	0	2.8e-05	0	0	0	0	0	0	0	0	0	0	0	0.00018304	0	0	0	0	0	8.67e-05	0	0	0	0	0	0	0	0	0	0	Eukaryota	Alveolata	Ciliophora	Litostomatea	Litostomatea_X	Litostomatea_XX	Litostomatea_XX_unclassified
OTU_8811	8.99e-05	2.25e-05	0	8.68e-05	0	0	0	0	0	0	0	0	0	0	0	0	0	0	3.26e-05	0	0.000750462	0.000136957	0	0	6.83e-05	0	3.47e-05	1.57e-05	0	0	0	0	0	0	0	0	0	Eukaryota	Alveolata	Ciliophora	Litostomatea	Litostomatea_X	Litostomatea_XX	Litostomatea_XX_unclassified
OTU_546	0.00113864	0.00096677	0	8.68e-05	0	0	0	0	0	0	0	0	0	0	0	0	0	0	0.000293418	0	0.00567423	1.96e-05	0	0	4.1e-05	0	0	0	4.65e-05	0	0	0	0	0	0	0	0	Eukaryota	Alveolata	Ciliophora	CONThreeP	CONThreeP_X	CONThreeP_XX	Askenasia_sp.
OTU_441	0	0	0	8.68e-05	0.000119893	5.67e-05	7.94e-05	0	0	0	5.57e-05	0.000184434	0.000128174	0.000169727	3.52e-05	0.000102509	0.000261945	7.08e-05	0	0	0	0.00510653	0.00220353	0.00100229	0.000669774	0.000605256	0.000277359	0.00039273	0.000170617	0.000188679	0.000277116	0.000216779	0.000464376	0.000244205	0.000322399	0.000136316	0.000411407	Eukaryota	Hacrobia	Cryptophyta	Cryptophyceae	Cryptophyceae_X	Cryptomonadales	Rhodomonas_sp.
OTU_5900	0	0	0	8.68e-05	0.00131883	0.00106909	0	7.56e-05	0	0	0	0	0.000327556	0.000324024	3.52e-05	0.000102509	0	0	0	0	0	0	0	0	0	8.41e-05	0	3.14e-05	0	2.1e-05	0	0	0	1.74e-05	0	0	0	Eukaryota	Alveolata	Dinoflagellata	Dinophyceae	Dinophyceae_unclassified	Dinophyceae_unclassified	Dinophyceae_unclassified
OTU_2002	0	0	0	8.68e-05	0.00026976	0.000518349	0.0032964	0.00158666	0	0	0.000139256	9.22e-05	0.000113933	0.000200586	0.000123326	0.000574053	0.000244482	7.08e-05	0	0	0	0	0	0	1.37e-05	1.68e-05	0.000121344	3.14e-05	9.31e-05	8.39e-05	8.31e-05	9.03e-05	0.000110566	0.000209318	9.67e-05	0.000170395	0.000168303	Eukaryota	Alveolata	Dinoflagellata	Dinophyceae	Dinophyceae_unclassified	Dinophyceae_unclassified	Dinophyceae_unclassified
OTU_623	0	0	0	8.68e-05	0	0	0	0	0	0	0.00958084	0.000922169	8.54e-05	4.63e-05	0.000246653	0	0	0	0	0	0	0	0	0	0	0	0	0	0	0	0	0	0	0	0	0	0	Eukaryota	Alveolata	Dinoflagellata	Syndiniales	Dino-Group-II	Dino-Group-II_unclassified	Dino-Group-II_unclassified
OTU_1396	0.000539358	0.00148388	0	8.68e-05	0	0	0	0	0	0	0	0	0	0	0	0	0	0	0	0	1.83e-05	0	3.22e-05	0	0	0	0	0	0	0	0	0	0	0	0	0	0	Eukaryota	Opisthokonta	Mesomycetozoa	Ichthyosporea	Ichthyosphonida	Ichthyophonidae_Freshwater	Ichthyophonidae_Freshwater_X_sp.
OTU_802	0.000449465	0.000809389	0	8.68e-05	0	0	0	0	0	0.000218436	0.000250661	0	0	0	0	0	0	0	0	0.000376413	5.49e-05	0	0	0	0	0	0	0	0	0	0	0	0	0	0	0	0	Eukaryota	Stramenopiles	Ochrophyta	Chrysophyceae	Chrysophyceae_X	Chrysophyceae_X_unclassified	Chrysophyceae_X_unclassified
OTU_2117	0.000359572	0.00022483	0	8.68e-05	0	0	0	0	0.000769026	0.00594631	0	0	0	0	0	0	0	0	0	0	0	0	0	0	0	0	0	0	0	0	0	0	0	0	0	0	0	Eukaryota	Stramenopiles	Ochrophyta	Ochrophyta_unclassified	Ochrophyta_unclassified	Ochrophyta_unclassified	Ochrophyta_unclassified
OTU_2166	0.000329608	0.000269796	0	8.68e-05	0	0	0	0	0.000111858	7.28e-05	0	0	0	0	0	0	0	0	0	1.45e-05	0	0	0	0	0	0	0	0	0	0	0	0	0	0	0	0	0	Eukaryota	Stramenopiles	Ochrophyta	Chrysophyceae	Chrysophyceae_X	Chrysophyceae_X_unclassified	Chrysophyceae_X_unclassified
OTU_2674	0.000449465	0.000134898	0	8.68e-05	0	0	0	0	0	0	0	0	0	0	0	0	0	0	0	0	0	0	0	0	0	0	0	0	0	0	0	0	0	0	0	0	0	Eukaryota	Stramenopiles	Ochrophyta	Ochrophyta_unclassified	Ochrophyta_unclassified	Ochrophyta_unclassified	Ochrophyta_unclassified
OTU_515	0.000599287	0.00101174	0	8.68e-05	0	0	0	0	0	0	0.000974795	0.000115271	0	0	0	0	0	0	0	0.000694917	1.83e-05	0	0	0	0	0	0	0	0	0	0	0	0	0	0	0	0	Eukaryota	Alveolata	Perkinsea	Perkinsida	Perkinsida_X	Perkinsida_XX	Perkinsida_XXX_sp.
OTU_272	3e-05	0	0	8.68e-05	0.00191829	0.0010367	0.00415028	0.00395406	0	0	5.57e-05	0.000345813	0.00118205	0.00175899	0.00297745	0.00272675	0.00492456	0.000106208	0	0	0	0	0	0	1.37e-05	1.68e-05	0.000208019	0	6.2e-05	0	0.000415674	0.000126454	0.00077396	0.000418636	0.000838236	0.00103941	0.00102852	Eukaryota	Stramenopiles	Stramenopiles_X	MAST	MAST-1	MAST-1C	MAST-1C_X_sp.
OTU_2786	0	0	0	8.68e-05	0	0	0.00017872	0.000201481	0	0	0	0	0	0	0	0	0	0	0	0	0	0	0	0	0	0	0	0	0	0	0	0	0	0	0	0	1.87e-05	Eukaryota	Stramenopiles	Stramenopiles_X	Oomycota	Oomycota_X	Oomycota_XX	Oomycota_XXX_sp.
OTU_16378	0	0	0.000643643	6.94e-05	0.000119893	0.000380662	0	0	0	0	0	0	0	0	0	0	0	0	0	0	0	0	0	0	0	0	0	0	0	0	0	0	0	0	0	0	0	Eukaryota	Stramenopiles	Ochrophyta	Bacillariophyta	Bacillariophyta_X	Polar-centric-Mediophyceae	Chaetoceros_decipiens
OTU_5394	0	0	0.000482732	6.94e-05	0	0	0	0	0	0	0	2.31e-05	0	1.54e-05	0	0	0	0	0	0	0	0	0	0	0.000109351	0.000302628	0.000208019	0.000172801	0.000155106	2.1e-05	0.000138558	0	4.42e-05	6.98e-05	0	8.52e-05	0	Eukaryota	Alveolata	Ciliophora	Spirotrichea	Strombidiida	Strombidiidae_R	Strombidium_R_unclassified
OTU_5423	0	0	0.000462618	6.94e-05	3e-05	7.29e-05	0	0	0	0	0	0	0	1.54e-05	0	0	0	0	0	0	0	0	0	0	0	0	0	0	0	0	0	0	2.21e-05	0	0	0	0	Eukaryota	Alveolata	Dinoflagellata	Dinophyceae	Peridiniales	Peridiniales_unclassified	Peridiniales_unclassified
OTU_4884	0	0	0.000402277	6.94e-05	0	1.62e-05	0	0	0	0	0	0	0	0	0	0	0	0	0	0	0	0	0	0	0	0	0	0	0	0	0	0	0	0	0	0	0	Eukaryota	Eukaryota_unclassified	Eukaryota_unclassified	Eukaryota_unclassified	Eukaryota_unclassified	Eukaryota_unclassified	Eukaryota_unclassified
OTU_17240	0	0	0.000382163	6.94e-05	0.00017984	0.000113389	0	0	0	0	0	0	1.42e-05	4.63e-05	0	0	0	0	0	0	0	0	0	0	0	0	0	0	0	0	0	0	0	0	0	0	1.87e-05	Eukaryota	Eukaryota_unclassified	Eukaryota_unclassified	Eukaryota_unclassified	Eukaryota_unclassified	Eukaryota_unclassified	Eukaryota_unclassified
OTU_5971	0	0	0.000281594	6.94e-05	5.99e-05	3.24e-05	0	0	0	0	0	0	0	0	0	0	0	0	0	0	0	0	0	0	0	0	0	0	0	0	0	0	0	0	0	0	0	Eukaryota	Hacrobia	Cryptophyta	Cryptophyceae	Cryptophyceae_X	Cryptomonadales	Teleaulax_amphioxeia
OTU_2611	0	0	0.000281594	6.94e-05	0.000149867	0.000267274	0.000119147	2.52e-05	0	0	0	9.22e-05	0.000299073	0.000231446	1.76e-05	0.000205019	0	7.08e-05	0	0	0	1.96e-05	6.43e-05	0	5.47e-05	0.000487567	0.000225354	0.000172801	0.000279191	0.000314465	0.000581943	0.000469687	0	0.000296534	0.00011284	0.00037487	0.000243104	Eukaryota	Alveolata	Dinoflagellata	Dinophyceae	Dinophyceae_unclassified	Dinophyceae_unclassified	Dinophyceae_unclassified
OTU_11170	0.00140832	0.000831872	0.00026148	6.94e-05	0	0	0	0	0	0	0.000139256	2.31e-05	0	0	0	0	0	0	0.000130408	0	0.000494207	0.000156522	3.22e-05	4.3e-05	0	1.68e-05	0	1.57e-05	0	2.1e-05	0	0	0	0	0	0	0	Eukaryota	Alveolata	Alveolata_unclassified	Alveolata_unclassified	Alveolata_unclassified	Alveolata_unclassified	Alveolata_unclassified
OTU_5737	0	0	0.00026148	6.94e-05	8.99e-05	6.48e-05	0	0	0	0	0	0	0	0	0	0	0	0	0	0	0	0	0	0	0	0	0	0	0	0	0	0	0	0	0	0	0	Eukaryota	Hacrobia	Cryptophyta	Cryptophyceae	Cryptophyceae_X	Cryptomonadales	Cryptomonadales_unclassified
OTU_4715	0	0	0.000221252	6.94e-05	0.00257771	0.000494051	0	5.04e-05	0	0	2.79e-05	0	2.85e-05	7.71e-05	1.76e-05	4.1e-05	5.24e-05	0	0	0	0	0	0	0	1.37e-05	1.68e-05	0	0	6.2e-05	0.000356394	0.000193981	9.03e-05	0.000243244	5.23e-05	9.67e-05	8.52e-05	9.35e-05	Eukaryota	Archaeplastida	Chlorophyta	Mamiellophyceae	Mamiellales	Mamiellaceae	Micromonas polaris
OTU_11620	0	0	0.000221252	6.94e-05	3e-05	0	0	0	0	0	0	2.31e-05	1.42e-05	1.54e-05	0	2.05e-05	1.75e-05	0.000159312	0	0	0	0	3.22e-05	0	0.000205033	0.000201752	0.000190684	0.000314184	0.000155106	0.000125786	0.000360251	9.03e-05	0.000132679	6.98e-05	0.00011284	8.52e-05	0	Eukaryota	Alveolata	Ciliophora	Spirotrichea	Strombidiida	Strombidiidae_R	Strombidium_R_unclassified
OTU_5212	0	0	0.000221252	6.94e-05	8.99e-05	0	0	2.52e-05	0	0	0	0	2.85e-05	1.54e-05	0	0	0	1.77e-05	0	0	0	0	1.61e-05	2.86e-05	0	3.36e-05	0	3.14e-05	0	2.1e-05	8.31e-05	9.03e-05	2.21e-05	1.74e-05	3.22e-05	1.7e-05	5.61e-05	Eukaryota	Alveolata	Dinoflagellata	Dinophyceae	Peridiniales	Heterocapsaceae	Heterocapsa_unclassified
OTU_2837	0	0	0.000221252	6.94e-05	8.99e-05	0.000348266	0	0	0	0	0	0	1.42e-05	0	0	0	0	0	0	0	0	0	0	0	0	0	0	0	0	0	0	0	0	0	0	0	0	Eukaryota	Stramenopiles	Ochrophyta	Bacillariophyta	Bacillariophyta_X	Polar-centric-Mediophyceae	Chaetoceros_unclassified
OTU_4028	0	0	0.000201138	6.94e-05	0	8.1e-06	0	0	0	0	0	0	0	0	0	0	0	1.77e-05	0	0	0	0	9.65e-05	0	0.000177695	0.000554818	1.73e-05	7.85e-05	6.2e-05	8.39e-05	0.000138558	0	6.63e-05	1.74e-05	0	3.41e-05	3.74e-05	Eukaryota	Alveolata	Ciliophora	Spirotrichea	Strombidiida	Strombidiidae_R	Strombidium_R_unclassified
OTU_22514	0	2.25e-05	0.000181025	6.94e-05	0.0008992	0.000834217	0.000258152	0.00010074	0	0	0	2.31e-05	1.42e-05	7.71e-05	0	0.000205019	0	0	0	0	0	0	0	0	0	1.68e-05	0	1.57e-05	0	4.19e-05	2.77e-05	3.61e-05	0	5.23e-05	3.22e-05	8.52e-05	1.87e-05	Eukaryota	Alveolata	Dinoflagellata	Dinophyceae	Dinophyceae_unclassified	Dinophyceae_unclassified	Dinophyceae_unclassified
OTU_5986	0	0	0.000181025	6.94e-05	0.000149867	0.000437357	0	0	0	0	0	0	2.85e-05	0	0	4.1e-05	3.49e-05	0	0	0	0	0	0	0	0	0	0	0	0	0	0	0	2.21e-05	0	0	0	0	Eukaryota	Alveolata	Dinoflagellata	Dinophyceae	Gymnodiniales	Gymnodiniaceae	Gyrodinium_unclassified
OTU_3785	0	0	0.000181025	6.94e-05	0.000239787	0.00080992	0	0	0	0	5.57e-05	0.000184434	0.000113933	0	1.76e-05	0.000307528	5.24e-05	1.77e-05	0	0	0	0	0	0	0	0	0	0	0	0	0	0	2.21e-05	0	0	1.7e-05	0	Eukaryota	Stramenopiles	Ochrophyta	Bacillariophyta	Bacillariophyta_X	Polar-centric-Mediophyceae	Chaetoceros_decipiens
OTU_493	0.00068918	0.000472144	0.000160911	6.94e-05	0	0	0	0	0	0	0	0	0	0	0	0	0	0	0	1.45e-05	0.000256255	5.87e-05	0	0	1.37e-05	0	0	0	0	0	0	0	0	0	0	0	0	Eukaryota	Opisthokonta	Choanoflagellida	Choanoflagellatea	Craspedida	Monosigidae_Group_A	Monosiga_ovata
OTU_122	0	0	0.000160911	6.94e-05	0.000749333	0.00050215	0.00186663	0.00171259	0	0	2.79e-05	0.000322759	0.000284831	0.000910353	1.76e-05	0.000676562	0.000261945	8.85e-05	0	0	0	0	0	0	8.2e-05	0.000100876	0.000728067	0.000172801	0.000186127	6.29e-05	0.000277116	0.000144519	0.000619168	0.000575625	0.000822117	0.000357831	0.00127162	Eukaryota	Alveolata	Dinoflagellata	Dinophyceae	Dinophyceae_unclassified	Dinophyceae_unclassified	Dinophyceae_unclassified
OTU_5225	0	0	0.000160911	6.94e-05	0	8.1e-06	5.96e-05	7.56e-05	0	0	2.79e-05	0.000115271	1.42e-05	1.54e-05	0	0	0	1.77e-05	0	0	0	9.78e-05	0.000611198	7.16e-05	1.37e-05	0.000168127	3.47e-05	3.14e-05	1.55e-05	8.39e-05	0	0.000162584	2.21e-05	1.74e-05	0	1.7e-05	1.87e-05	Eukaryota	Alveolata	Dinoflagellata	Dinophyceae	Peridiniales	Heterocapsaceae	Heterocapsa_unclassified
OTU_832	0	0	0.000160911	6.94e-05	0.00026976	0.000113389	0.00017872	7.56e-05	0	0	2.79e-05	0.000115271	0.000199382	0.000123438	1.76e-05	6.15e-05	0	0.000442533	0	0	1.83e-05	0	0	0	2.73e-05	0.000235377	0.000658727	0.000125674	0.000186127	0.000566038	0.000803636	0.000596141	0.00187962	0.000191875	0.001209	0.000340791	0.00158953	Eukaryota	Eukaryota_unclassified	Eukaryota_unclassified	Eukaryota_unclassified	Eukaryota_unclassified	Eukaryota_unclassified	Eukaryota_unclassified
OTU_4438	0	0	0.000140797	6.94e-05	0.000149867	8.91e-05	0	0	0	0	0	9.22e-05	8.54e-05	0.000138867	0	0.000123011	0	3.54e-05	0	0	0	0	0	0	0	0	0	0	1.55e-05	2.1e-05	0	0.000108389	0	0.000104659	3.22e-05	3.41e-05	0	Eukaryota	Alveolata	Ciliophora	Spirotrichea	Strombidiida_G	Strombidiida_G_X	Strombidiida_G_X_unclassified
OTU_883	0	0	0.000140797	6.94e-05	0	2.43e-05	0	0	0	0	0	4.61e-05	0	0	0	0	0	3.54e-05	0	0	0	0	0	0	6.83e-05	0.000168127	0.000156014	3.14e-05	3.1e-05	0	0.000193981	0	2.21e-05	0.000122102	0.000128959	5.11e-05	7.48e-05	Eukaryota	Alveolata	Ciliophora	Spirotrichea	Strombidiida	Strombidiidae_R	Strombidium_biarmatum
OTU_4420	0	0	0.000140797	6.94e-05	0	0	0	0	0	0	0	0	0	0	0	0	0	1.77e-05	0	0	0	0	0	0	1.37e-05	0	3.47e-05	4.71e-05	1.55e-05	0	0	0	0	0	0	1.7e-05	0	Eukaryota	Alveolata	Ciliophora	Spirotrichea	Strombidiida	Strombidiidae_R	Strombidium_biarmatum
OTU_3355	0	0	0.000140797	6.94e-05	8.99e-05	8.91e-05	0.000119147	0.000201481	0	0	0	0	0	1.54e-05	0	2.05e-05	0	0	0	0	0	0	0	0	0	1.68e-05	0.000138679	0	4.65e-05	0	8.31e-05	3.61e-05	0	6.98e-05	8.06e-05	0.000102237	0.000149603	Eukaryota	Alveolata	Dinoflagellata	Dinophyceae	Dinophyceae_unclassified	Dinophyceae_unclassified	Dinophyceae_unclassified
OTU_15222	0	0	0.000140797	6.94e-05	0	0	0	0	0	0	0	0	0	0	0	0	0	0	0	0	0	0	3.22e-05	0	0.000779125	0.000453942	6.93e-05	0.000455567	0.000310212	2.1e-05	0	0	0	0	0	0	0	Eukaryota	Eukaryota_unclassified	Eukaryota_unclassified	Eukaryota_unclassified	Eukaryota_unclassified	Eukaryota_unclassified	Eukaryota_unclassified
OTU_251	0.00116861	0.000809389	0.000140797	6.94e-05	0	0	0	0	0	0	8.36e-05	0	0	0	0	0	0	0	0.000749845	0	0.000420991	9.78e-05	1.61e-05	0	0	0	0	0	0	0	0	0	0	0	0	0	0	Eukaryota	Stramenopiles	Stramenopiles_X	Bicoecea	Bicoecales	Bicoecaceae	Bicoecaceae_X_sp.
OTU_989	0	0	0.000120683	6.94e-05	0.00035968	0.000121488	9.93e-05	7.56e-05	0	0	0	0.000184434	0.0020223	0.0015584	0.0017618	0.000676562	0.00125733	0.000159312	0	0	0	0	3.22e-05	0	0.000136689	0.00031944	0.00112677	0.000549822	0.000884105	0.000691824	0.0019121	0.00146326	0.000751846	0.00183153	0.000338519	0.00165284	0.000654511	Eukaryota	Opisthokonta	Choanoflagellida	Choanoflagellatea	Acanthoecida	Stephanoecidae_Group_D	Stephanoecidae_Group_D_X_sp.
OTU_2351	0	0	0.000120683	6.94e-05	0	8.1e-06	0	0	0	0	0	0	1.42e-05	6.17e-05	1.76e-05	0	1.75e-05	5.31e-05	0	0	0	0	0	0	2.73e-05	0.000168127	0.000364033	0.000219929	0.000124085	4.19e-05	0.000166269	9.03e-05	0.000110566	8.72e-05	9.67e-05	0.000136316	1.87e-05	Eukaryota	Alveolata	Ciliophora	Spirotrichea	Strombidiida	Strombidiidae_R	Strombidium_R_unclassified
OTU_1457	0.00146825	0.00317011	0.000100569	6.94e-05	0	0	0	0	0.000125841	0.000388331	0.000111405	4.61e-05	0	3.09e-05	3.52e-05	0	0	0	0	0	0	0	0	0	0	0	0	0	0	0	0	0	0	0	0	0	0	Eukaryota	Rhizaria	Cercozoa	Novel-clade-10-12	Novel-clade-10	Novel-clade-10_X	Novel-clade-10_XX_sp.
OTU_10850	0	0	0.000100569	6.94e-05	8.99e-05	2.43e-05	0	0	0	0	0	0	0	0	0	2.05e-05	0	0	0	0	0	0	0	0	2.73e-05	0	0	0	0	8.39e-05	0	0	0	0	0	0	0	Eukaryota	Archaeplastida	Chlorophyta	Mamiellophyceae	Mamiellales	Mamiellaceae	Micromonas_unclassified
OTU_651	0	0	0.000100569	6.94e-05	0	8.1e-06	5.96e-05	0.000251851	0	0	5.57e-05	0.000115271	0	1.54e-05	0	0	0	1.77e-05	0	0	0	0	8.04e-05	5.73e-05	0	1.68e-05	5.2e-05	7.85e-05	0	0	0	0	0	0.000104659	0	1.7e-05	0	Eukaryota	Alveolata	Ciliophora	Litostomatea	Haptoria_4	Didiniidae	Didiniidae_X_sp.
OTU_13549	0	0	0.000100569	6.94e-05	0	8.1e-06	0	0	0	0	0	0	1.42e-05	0	0	0	0	0	0	0	0	0	0	0	0	0	0	0	0	8.39e-05	0	5.42e-05	0	1.74e-05	1.61e-05	0	0	Eukaryota	Alveolata	Ciliophora	Spirotrichea	Strombidiida	Strombidiidae_R	Strombidium_R_unclassified
OTU_11604	0	0	0.000100569	6.94e-05	0	0	0	0	0	0	0	0	5.7e-05	0	5.29e-05	2.05e-05	0	5.31e-05	0	0	0	1.96e-05	0.000176926	1.43e-05	0.000669774	0.000655694	0.000364033	0.000439857	0.000341233	0.000440252	0.000221693	3.61e-05	4.42e-05	3.49e-05	1.61e-05	8.52e-05	1.87e-05	Eukaryota	Alveolata	Ciliophora	Spirotrichea	Strombidiida	Strombidiidae_R	Strombidium_R_unclassified
OTU_4944	0	0	0.000100569	6.94e-05	0	0	0	0	0	0	0	0	0	0	0	0	0	0	0	0	0	0	0	0	5.47e-05	0.000134501	1.73e-05	1.57e-05	3.1e-05	2.1e-05	0	0	4.42e-05	1.74e-05	0	8.52e-05	0	Eukaryota	Alveolata	Ciliophora	Spirotrichea	Strombidiida	Strombidiidae_R	Strombidium_R_unclassified
OTU_1334	0	0	0.000100569	6.94e-05	3e-05	4.05e-05	0.000119147	0.000201481	0	0	0.000111405	0.000576356	0.000598146	0.000648048	0.000140944	0.000512547	0.000576278	0.00203565	0	0	0	1.96e-05	0.000402104	0.000157503	0.000150357	0.000269003	0.000485378	0.00039273	0.000744509	0.00144654	0.00130244	0.00171616	0.00103932	0.000697727	0.000741517	0.000647503	0.000467508	Eukaryota	Hacrobia	Cryptophyta	Cryptophyceae	Cryptophyceae_X	Cryptomonadales	Teleaulax_gracilis
OTU_459	0.00365565	0.00204595	0.000100569	6.94e-05	0	0	0	5.04e-05	0	4.85e-05	0	0	0	0	0	0	0	0	0	0	0.000384383	3.91e-05	0	0	0	0	0	0	0	0	0	0	0	0	0	0	0	Eukaryota	Hacrobia	Cryptophyta	Cryptophyceae	Cryptophyceae_X	Cryptomonadales	Cryptomonas_tetrapyrenoidosa
OTU_7045	0	0	0.000100569	6.94e-05	0.000599466	4.05e-05	0	7.56e-05	0	0	0	4.61e-05	0	4.63e-05	0	0	1.75e-05	1.77e-05	0	0	0	0	0	0	2.73e-05	0	6.93e-05	7.85e-05	0	2.1e-05	0.000110846	0	2.21e-05	1.74e-05	0	0	0	Eukaryota	Alveolata	Dinoflagellata	Dinophyceae	Gymnodiniales	Gymnodiniaceae	Gyrodinium_helveticum
OTU_6971	0	0	0.000100569	6.94e-05	0.000119893	5.67e-05	0	0	0	0	0	2.31e-05	0	0	0	6.15e-05	1.75e-05	0	0	0	0	0	0	0	4.1e-05	1.68e-05	1.73e-05	0.000251347	3.1e-05	6.29e-05	0.000110846	0.000361298	6.63e-05	0.000139545	3.22e-05	5.11e-05	1.87e-05	Eukaryota	Alveolata	Dinoflagellata	Dinophyceae	Gymnodiniales	Gymnodiniaceae	Gyrodinium_unclassified
OTU_6443	0	0	0.000100569	6.94e-05	3e-05	0	0.000158863	0.00010074	0	0	0	0	0.000156657	0.000108008	0.000105708	0.000143513	3.49e-05	3.54e-05	0	0	0	1.96e-05	8.04e-05	1.43e-05	8.2e-05	0.000100876	0.000121344	3.14e-05	6.2e-05	0.000293501	0.000138558	0.000307103	2.21e-05	3.49e-05	4.84e-05	0.000102237	0.000243104	Eukaryota	Alveolata	Dinoflagellata	Dinophyceae	Peridiniales	Heterocapsaceae	Heterocapsa_unclassified
OTU_5613	0	0	0.000100569	6.94e-05	0.00026976	0.000153885	3.97e-05	7.56e-05	0	0	0	9.22e-05	1.42e-05	0.000154297	0	6.15e-05	1.75e-05	0.000247818	0	0	0	0	0	0	0.000191364	0.000117689	0.000173349	0.000267056	6.2e-05	0.000503145	0.000138558	0.00144519	6.63e-05	0.000313977	0.000177319	0.000221514	0.000130902	Eukaryota	Eukaryota_unclassified	Eukaryota_unclassified	Eukaryota_unclassified	Eukaryota_unclassified	Eukaryota_unclassified	Eukaryota_unclassified
OTU_4452	0	0	0.000100569	6.94e-05	3e-05	0	0	0	0	0	0	0	0	0	0	0	0	3.54e-05	0	0	0	0	1.61e-05	0	9.57e-05	0.000151314	0.000173349	0.000345602	0.00024817	0.000188679	0.000249404	0	6.63e-05	0.000122102	0.000161199	0.000119277	5.61e-05	Eukaryota	Eukaryota_unclassified	Eukaryota_unclassified	Eukaryota_unclassified	Eukaryota_unclassified	Eukaryota_unclassified	Eukaryota_unclassified
OTU_1483	0.00146825	0.000494627	8.05e-05	6.94e-05	0	0	0	0	0	0	0	0	0	0	0	0	0	0	0	0	0	0	0	0	0	0	0	0	0	0	0	0	0	0	0	0	0	Eukaryota	Hacrobia	Centroheliozoa	Centroheliozoa_X	Centroheliozoa_X_unclassified	Centroheliozoa_X_unclassified	Centroheliozoa_X_unclassified
OTU_1049	0	0	8.05e-05	6.94e-05	0.00248779	0.00439786	0	0	0	0	0	0	0	0	0	0	0	0	0	0	0	0	0	0	0	0	0	0	0	0	0	0	0	0	0	0	0	Eukaryota	Alveolata	Ciliophora	CONTH_8	CONTH_8_X	CONTH_8_XX	CONTH_8_XXX_sp.
OTU_1899	0.00140832	0.00386708	8.05e-05	6.94e-05	0	0	0	0	1.4e-05	2.43e-05	0	0	0	0	0	0	0	0	0	1.45e-05	0	1.96e-05	0	0	0	0	0	0	0	0	0	0	0	0	0	0	0	Eukaryota	Alveolata	Ciliophora	Spirotrichea	Strombidiida	Strombidiida_unclassified	Strombidiida_unclassified
OTU_4456	0	2.25e-05	8.05e-05	6.94e-05	0.000779306	0.000866614	0.000198578	0.000125926	0	0	0	0.000207488	0.000128174	0.000462892	3.52e-05	0.000533049	3.49e-05	0.00026552	0	0	0	0	0	0	1.37e-05	0.000285815	0.000398703	0.000235638	0.000604914	0.000251572	0.000332539	0.000361298	0.000243244	0.000802386	0.000338519	0.0013802	0.000448808	Eukaryota	Alveolata	Dinoflagellata	Dinophyceae	Dinophyceae_unclassified	Dinophyceae_unclassified	Dinophyceae_unclassified
OTU_4113	0	0	8.05e-05	6.94e-05	0.000509547	0.000356365	3.97e-05	0	0	0	0	4.61e-05	0.000156657	0.000185157	3.52e-05	0.000184517	0.000104778	5.31e-05	0	0	0	0	1.61e-05	0	1.37e-05	8.41e-05	0.000658727	6.28e-05	0.000155106	0.000209644	0.000581943	0.000252908	0.00108354	0.00033142	0.000951076	0.000187435	0.00132772	Eukaryota	Alveolata	Dinoflagellata	Dinophyceae	Peridiniales	Thoracosphaeraceae	Pentapharsodinium_sp.
OTU_23204	0	2.25e-05	8.05e-05	6.94e-05	0.000299733	0.00020248	0.000278009	0.000176296	0	0	0	2.31e-05	0.000113933	0.000339454	0	0.000123011	5.24e-05	3.54e-05	0	0	1.83e-05	0	0	0	0	0	1.73e-05	4.71e-05	1.55e-05	2.1e-05	2.77e-05	1.81e-05	0	1.74e-05	1.61e-05	1.7e-05	3.74e-05	Eukaryota	Alveolata	Dinoflagellata	Dinophyceae	Dinophyceae_unclassified	Dinophyceae_unclassified	Dinophyceae_unclassified
OTU_161	0	0	8.05e-05	6.94e-05	0.000149867	0.000194381	0.000278009	0.000176296	0	0	0	0	0.000199382	0.000246875	0	0.000246023	3.49e-05	0	0	0	0	0	0	0	1.37e-05	1.68e-05	1.73e-05	0	0	2.1e-05	5.54e-05	0	8.85e-05	0	4.84e-05	3.41e-05	1.87e-05	Eukaryota	Alveolata	Dinoflagellata	Dinophyceae	Dinophyceae_unclassified	Dinophyceae_unclassified	Dinophyceae_unclassified
OTU_3818	0.00290654	0.00254058	8.05e-05	6.94e-05	0	0	0	0	0.000237699	0.00349498	0.000111405	9.22e-05	2.85e-05	0	0	0	1.75e-05	0	0	0.000463278	1.83e-05	0	0	0	0	0	0	0	0	0	0	0	0	0	0	0	0	Eukaryota	Stramenopiles	Ochrophyta	Ochrophyta_unclassified	Ochrophyta_unclassified	Ochrophyta_unclassified	Ochrophyta_unclassified
OTU_1152	0.00101879	0.000202347	8.05e-05	6.94e-05	0	0	0	0	0.000713097	0.0018203	8.36e-05	0	0	0	0	0	0	0	0.00156489	0.000521188	0.000292863	5.87e-05	1.61e-05	0	1.37e-05	0	0	0	0	0	0	0	0	0	0	0	0	Eukaryota	Stramenopiles	Ochrophyta	Chrysophyceae	Chrysophyceae_X	Chrysophyceae_Clade-B2	Chrysophyceae_Clade-B2_unclassified
OTU_5489	0.000269679	8.99e-05	8.05e-05	6.94e-05	0	0	0	0	1.4e-05	7.28e-05	0	0	0	0	0	0	0	0	0	0	0	0	0	0	0	0	0	0	0	0	0	0	0	0	0	0	0	Eukaryota	Stramenopiles	Ochrophyta	Chrysophyceae	Chrysophyceae_X	Chrysophyceae_Clade-D	Chrysophyceae_Clade-D_X_sp.
OTU_314	0.000509394	0.000831872	6.03e-05	6.94e-05	0	0	0	0	0.000153805	0.000339789	0.00100265	4.61e-05	0	0	0	0	0	0	0	0	0.0023063	0.000860871	0.000209094	1.43e-05	2.73e-05	0	0	3.14e-05	0	0	0	0	0	0	0	0	0	Eukaryota	Rhizaria	Cercozoa	Filosa-Thecofilosea	Cryomonadida	Protaspa-lineage	Protaspa-lineage_X_sp.
OTU_6159	0	0	6.03e-05	6.94e-05	0.00164853	0.000631738	0	2.52e-05	0	0	2.79e-05	6.92e-05	9.97e-05	0.000123438	5.29e-05	2.05e-05	1.75e-05	3.54e-05	0	0	0	0	0	0	2.73e-05	1.68e-05	8.67e-05	1.57e-05	1.55e-05	0.000251572	0.000110846	0.000144519	6.63e-05	0.000122102	6.45e-05	0.000102237	1.87e-05	Eukaryota	Archaeplastida	Chlorophyta	Mamiellophyceae	Mamiellales	Mamiellaceae	Micromonas polaris
OTU_3871	0	0	6.03e-05	6.94e-05	0.000119893	4.05e-05	1.99e-05	2.52e-05	0	0	0.000891241	0.00087606	0.000868735	0.000709767	0.00118041	0.000246023	0.00115256	0.00146921	0	1.45e-05	0	0	9.65e-05	4.3e-05	0.00047841	0.000100876	0.000468043	0.000282765	0.000573893	0.00150943	0.000554232	0.000650336	0.0030295	0.000750057	0.00211171	0.00076678	0.000804114	Eukaryota	Archaeplastida	Chlorophyta	Mamiellophyceae	Mamiellales	Mamiellaceae	Micromonas_polaris
OTU_5429	0	0	6.03e-05	6.94e-05	0.00017984	0.000194381	0	0	0	0	0	0	0	1.54e-05	0	0	0	0	0	0	0	0	0	0	0	0	1.73e-05	0	0	2.1e-05	0	0.000234844	0	6.98e-05	1.61e-05	0	0	Eukaryota	Alveolata	Ciliophora	Spirotrichea	Spirotrichea_unclassified	Spirotrichea_unclassified	Spirotrichea_unclassified
OTU_12840	0	0	6.03e-05	6.94e-05	3e-05	2.43e-05	0	0	0	0	0	0	5.7e-05	1.54e-05	0	0	0	0	0	0	0	0	0	0	0	1.68e-05	0	0	1.55e-05	2.1e-05	5.54e-05	0.000343233	0	8.72e-05	0	0	0	Eukaryota	Alveolata	Ciliophora	Spirotrichea	Strombidiida_F	Strombidiida_F_X	Strombidiida_F_XX_sp.
OTU_13603	0	0	6.03e-05	6.94e-05	0	0	0	0	0	0	0	2.31e-05	0	0	0	0	0	0	0	0	0	0	0	0	2.73e-05	5.04e-05	3.47e-05	6.28e-05	3.1e-05	0	2.77e-05	0	0	0	0	3.41e-05	0	Eukaryota	Alveolata	Ciliophora	Spirotrichea	Strombidiida	Strombidiidae_R	Strombidium_R_unclassified
OTU_4088	0	0	6.03e-05	6.94e-05	0	0	0	0	0	0	8.36e-05	0	2.85e-05	1.54e-05	0	0	0	0	0	0	0	0	0	0	0	1.68e-05	0	0	0	0	0	1.81e-05	0	0.000122102	0	0	0	Eukaryota	Alveolata	Ciliophora	Litostomatea	Haptoria_4	Didiniidae	Didiniidae_X_sp.
OTU_4212	0	0	6.03e-05	6.94e-05	0	0	0	0	0	0	0	0	0	1.54e-05	0	0	0	0	0	0	0	0	3.22e-05	0	0	3.36e-05	6.93e-05	0.000109964	6.2e-05	2.1e-05	0	0	0	6.98e-05	6.45e-05	0	0	Eukaryota	Alveolata	Ciliophora	Litostomatea	Haptoria_4	Didiniidae	Didiniidae_X_sp.
OTU_2429	0	0	6.03e-05	6.94e-05	0	0	0	0	0	0	0	0	1.42e-05	0	0	0	0	0	0	0	0	0	4.83e-05	0	1.37e-05	0	3.47e-05	9.43e-05	1.55e-05	4.19e-05	0	0	0	3.49e-05	3.22e-05	0	3.74e-05	Eukaryota	Alveolata	Ciliophora	Litostomatea	Haptoria_4	Didiniidae	Didiniidae_X_sp.
OTU_6508	0	2.25e-05	6.03e-05	6.94e-05	0.0004496	0.000242976	0.000139005	0.000151111	0	0	0	6.92e-05	2.85e-05	9.26e-05	0	0.000512547	3.49e-05	8.85e-05	0	0	0	0	0	0	1.37e-05	8.41e-05	5.2e-05	0.000109964	6.2e-05	6.29e-05	5.54e-05	0.000198714	2.21e-05	0.000401193	0.000145079	0.000357831	0.000149603	Eukaryota	Alveolata	Dinoflagellata	Dinophyceae	Dinophyceae_unclassified	Dinophyceae_unclassified	Dinophyceae_unclassified
OTU_23060	0	0	6.03e-05	6.94e-05	0.000119893	0.000153885	9.93e-05	0.000201481	0	0	0.00100265	0.00115271	0.00111084	0.00470606	0.00017618	0.000594555	0.000227019	0.000708052	0	0	0	0	0	0	0	0.000100876	0.000190684	4.71e-05	9.31e-05	8.39e-05	8.31e-05	0.000108389	2.21e-05	0.000104659	3.22e-05	0.000153356	0	Eukaryota	Alveolata	Dinoflagellata	Dinophyceae	Dinophyceae_unclassified	Dinophyceae_unclassified	Dinophyceae_unclassified
OTU_5876	0.00110868	0.00204595	6.03e-05	6.94e-05	0	0	0	0	0.00225115	0.00900442	2.79e-05	4.61e-05	8.54e-05	1.54e-05	0.000105708	0	0	0	0	0.00144774	1.83e-05	0	0	0	0	0	0	0	0	0	0	0	0	0	0	0	0	Eukaryota	Alveolata	Dinoflagellata	Dinophyceae	Suessiales	Suessiaceae	Asulcocephalium_miricentonis
OTU_2031	0.00233722	0.00215837	6.03e-05	6.94e-05	0	0	0	0	0.00461416	0.00800932	0.000139256	0	1.42e-05	0	0	0	0	0	0	0.000419846	0	0	4.83e-05	0	0	0	0	0	0	0	0	0	0	0	0	0	0	Eukaryota	Alveolata	Dinoflagellata	Dinophyceae	Dinophyceae_unclassified	Dinophyceae_unclassified	Dinophyceae_unclassified
OTU_500	0	2.25e-05	6.03e-05	6.94e-05	8.99e-05	0.000121488	0.000953175	0.000604443	0	0	5.57e-05	9.22e-05	0.000113933	9.26e-05	0.000440451	0.000533049	0.000785834	0.000991273	0	0	0	0	1.61e-05	0.000157503	0	0	1.73e-05	3.14e-05	1.55e-05	0	0	0	2.21e-05	0	6.45e-05	1.7e-05	9.35e-05	Eukaryota	Stramenopiles	Ochrophyta	Bacillariophyta	Bacillariophyta_X	Polar-centric-Mediophyceae	Chaetoceros_neogracile
OTU_16390	0	0	6.03e-05	6.94e-05	5.99e-05	3.24e-05	0	0	0	0	0	0	0	0	0	0	0	1.77e-05	0	0	0	0	0	0	0	1.68e-05	0	0	0	0	0	0	2.21e-05	3.49e-05	0	1.7e-05	3.74e-05	Eukaryota	Stramenopiles	Ochrophyta	Bacillariophyta	Bacillariophyta_X	Polar-centric-Mediophyceae	Chaetoceros_decipiens
OTU_75	0.00257693	0.00121408	6.03e-05	6.94e-05	0	0	0	0	0.000419469	0.00385904	0.00253447	0.000322759	0	0	0	0	0	0	0.000358622	0.000275071	0.000988414	0.000802176	0	0	0	0	0	0	0	0	0	0	0	0	0	0	0	Eukaryota	Stramenopiles	Ochrophyta	Chrysophyceae	Chrysophyceae_X	Chrysophyceae_Clade-F	Chrysophyceae_Clade-F_X_sp.
OTU_305	0.000809037	0.000449661	6.03e-05	6.94e-05	0	0	0	0	0	0	0	0	0	0	0	0	0	0	0	0	0	0	0	0	0	0	0	0	0	0	0	0	0	0	0	0	0	Eukaryota	Stramenopiles	Ochrophyta	Chrysophyceae	Chrysophyceae_X	Chrysophyceae_Clade-B2	Chrysosphaerella_unclassified
OTU_3888	0.000239715	0.000269796	6.03e-05	6.94e-05	0	0	0	0	0	0	0	0	0	0	0	0	0	0	0	0	0	0	0	0	0	0	0	0	0	0	0	0	0	0	0	0	0	Eukaryota	Stramenopiles	Ochrophyta	Synurophyceae	Synurales	Synurales_X	Synura_mammillosa
OTU_1162	0.000749109	0.000562076	6.03e-05	6.94e-05	0	0	0	0	0	0	0	0	0	0	0	0	0	0	0	0	0	0	0	0	0	0	0	0	0	0	0	0	0	0	0	0	0	Eukaryota	Opisthokonta	Opisthokonta_unclassified	Opisthokonta_unclassified	Opisthokonta_unclassified	Opisthokonta_unclassified	Opisthokonta_unclassified
OTU_526	0.000809037	0.000202347	6.03e-05	6.94e-05	0	0	0	0	0	0.000776661	0	0	0	0	0	0	0	0	0	0.000202684	0.000128128	1.96e-05	6.43e-05	0	0	0	0	0	0	0	0	0	0	0	0	0	0	Eukaryota	Alveolata	Perkinsea	Perkinsida	Perkinsida_X	Perkinsida_XX	Perkinsida_XXX_sp.
OTU_308	0.00440476	0.00283286	4.02e-05	6.94e-05	0	0	0	0	0.000139823	0.00131062	0	4.61e-05	0	1.54e-05	5.29e-05	0	0	0	0	0	0	0	0	0	0	0	0	0	0	0	0	0	0	0	0	0	0	Eukaryota	Rhizaria	Cercozoa	Novel-clade-10-12	Novel-clade-10	Novel-clade-10_X	Novel-clade-10_XX_sp.
OTU_353	0.00116861	0.00173119	4.02e-05	6.94e-05	0	0	0	0	0	0	8.36e-05	0	0	0	0	0	0	0	0	0	0	0	0	0	0	0	0	0	0	0	0	0	0	0	0	0	0	Eukaryota	Rhizaria	Cercozoa	Cercozoa_unclassified	Cercozoa_unclassified	Cercozoa_unclassified	Cercozoa_unclassified
OTU_1260	0.00137836	0.0011916	4.02e-05	6.94e-05	0	0	0	0	0	0	0.000111405	0	0	0	0	0	0	0	0	0	5.49e-05	0	0	0	0	0	0	0	0	0	0	0	0	0	0	0	0	Eukaryota	Rhizaria	Cercozoa	Filosa-Thecofilosea	Filosa-Thecofilosea_X	Mataza-lineage	Mataza-lineage_X_sp.
OTU_2686	0	0	4.02e-05	6.94e-05	0.000119893	0.000153885	0	0	0	0	0	6.92e-05	0	4.63e-05	0	2.05e-05	3.49e-05	0	0	0	0	0	0	0	0	0	0	0	1.55e-05	0	0	1.81e-05	0	0.000139545	0	1.7e-05	0	Eukaryota	Alveolata	Ciliophora	CONThreeP	CONThreeP_X	CONThreeP_XX	Askenasia_sp.
OTU_9467	0	0	4.02e-05	6.94e-05	5.99e-05	0.000178182	0	0	0	0	0	0	0	0.000108008	0	0	0	0	0	0	0	0	0	0	0	1.68e-05	0	0	0	2.1e-05	2.77e-05	5.42e-05	0	6.98e-05	0	1.7e-05	0	Eukaryota	Alveolata	Ciliophora	Spirotrichea	Spirotrichea_unclassified	Spirotrichea_unclassified	Spirotrichea_unclassified
OTU_4223	0	0	4.02e-05	6.94e-05	0	8.1e-06	0	0	0	0	0	4.61e-05	1.42e-05	3.09e-05	0	6.15e-05	0	1.77e-05	0	0	0	0	0	0	2.73e-05	0.000151314	0.000277359	0.00018851	0.000170617	0.000167715	8.31e-05	5.42e-05	8.85e-05	0.000139545	0.00011284	0.000136316	7.48e-05	Eukaryota	Alveolata	Ciliophora	Spirotrichea	Strombidiida	Strombidiidae_R	Strombidium_R_unclassified
OTU_3006	0	0	4.02e-05	6.94e-05	0	8.1e-06	0	0	0	0	0	0	0	1.54e-05	0	0	0	0	0	0	0	0	0	0	0	8.41e-05	0.00010401	0.000141383	0.000139595	0.000209644	8.31e-05	1.81e-05	2.21e-05	1.74e-05	1.61e-05	6.82e-05	0	Eukaryota	Alveolata	Ciliophora	Spirotrichea	Strombidiida	Strombidiidae_R	Strombidium_R_unclassified
OTU_1669	0	0	4.02e-05	6.94e-05	0	0	0	0	0	0	0	0	0	0	0	0	0	0	0	0	0	0	0.000112589	4.3e-05	0.00354023	0.00152995	0.000572053	0.00135099	0.000325723	6.29e-05	0.000110846	1.81e-05	0	1.74e-05	1.61e-05	3.41e-05	0	Eukaryota	Alveolata	Ciliophora	Spirotrichea	Strombidiida	Strombidiidae_R	Strombidium_biarmatum
OTU_4091	0.00293651	0.00101174	4.02e-05	6.94e-05	0	0	0	2.52e-05	0.00500566	0.00492695	2.79e-05	0	0	0	0	0	0	0	0.00867212	0.00315608	0.00818187	7.83e-05	0	0	0.000109351	0	1.73e-05	0	1.55e-05	0	0	0	0	0	0	0	0	Eukaryota	Hacrobia	Cryptophyta	Cryptophyceae	Cryptophyceae_X	Cryptomonadales	Cryptomonas_curvata
OTU_22517	0	0	4.02e-05	6.94e-05	5.99e-05	0.00051025	7.94e-05	0.00010074	0	0	2.79e-05	0.000276651	0	1.54e-05	0	0.000287026	0	0.000212416	0	0	0	0	0	0	2.73e-05	8.41e-05	6.93e-05	3.14e-05	0.000155106	4.19e-05	0.000332539	3.61e-05	2.21e-05	0.000348864	0.000161199	0.000221514	0.000411407	Eukaryota	Alveolata	Dinoflagellata	Dinophyceae	Dinophyceae_unclassified	Dinophyceae_unclassified	Dinophyceae_unclassified
OTU_2443	0	0	4.02e-05	6.94e-05	5.99e-05	0	0.000357441	0.000151111	0	0	0	0	1.42e-05	3.09e-05	0	4.1e-05	3.49e-05	0	0	0	0	0	1.61e-05	0	0	0	3.47e-05	0	0	0	5.54e-05	5.42e-05	0	5.23e-05	1.61e-05	3.41e-05	1.87e-05	Eukaryota	Alveolata	Dinoflagellata	Dinophyceae	Gymnodiniales	Gymnodiniales_unclassified	Gymnodiniales_unclassified
OTU_3894	0	0	4.02e-05	6.94e-05	3e-05	5.67e-05	0.000357441	0.000151111	0	0	0	0	0	0	0	0	0	0	0	0	0	0	0	0	1.37e-05	0	0	0	7.76e-05	0	0	0	0	3.49e-05	0	1.7e-05	1.87e-05	Eukaryota	Alveolata	Dinoflagellata	Dinophyceae	Dinophyceae_unclassified	Dinophyceae_unclassified	Dinophyceae_unclassified
OTU_352	0.00107872	0.00319259	4.02e-05	6.94e-05	0	0	0	0	0	4.85e-05	0.000167108	0	0	0	0	0	0	0	0	0	0	0	0	0	0	0	0	0	0	0	0	0	0	0	0	0	0	Eukaryota	Alveolata	Dinoflagellata	Dinophyceae	Dinophyceae_unclassified	Dinophyceae_unclassified	Dinophyceae_unclassified
OTU_15053	0	0	4.02e-05	6.94e-05	0.00221803	0.00152265	0	5.04e-05	0	0	0	6.92e-05	0.00138143	0.00149668	1.76e-05	0.000635558	0.000227019	0	0	0	0	0	0	0	0	5.04e-05	1.73e-05	0	0	0	8.31e-05	3.61e-05	0	3.49e-05	0	0	0	Eukaryota	Eukaryota_unclassified	Eukaryota_unclassified	Eukaryota_unclassified	Eukaryota_unclassified	Eukaryota_unclassified	Eukaryota_unclassified
OTU_4156	0	0	4.02e-05	6.94e-05	3e-05	3.24e-05	3.97e-05	0	0	0	0	0	0.00018514	0.000108008	0	2.05e-05	3.49e-05	0.000159312	0	0	0	0	0	0	6.83e-05	0.000201752	0.000329364	0.000267056	0.000124085	0.000377358	0.000138558	0.000686466	0.000221131	0.000122102	0.000225679	0.000255593	0.000299205	Eukaryota	Eukaryota_unclassified	Eukaryota_unclassified	Eukaryota_unclassified	Eukaryota_unclassified	Eukaryota_unclassified	Eukaryota_unclassified
OTU_649	0	0	4.02e-05	6.94e-05	0.000389653	0.000137686	0.00371341	0.00297184	0	2.43e-05	0.00200529	0.00315843	0.00348918	0.00390372	0.0118569	0.00774971	0.0156992	0.00107978	0	4.34e-05	0	0	0	2.86e-05	5.47e-05	8.41e-05	0.000138679	0.00018851	0.000418786	0.000293501	0.000942194	0.000487752	0.000420149	0.000627954	0.000386878	0.000851977	0.00056101	Eukaryota	Hacrobia	Haptophyta	Prymnesiophyceae	Prymnesiophyceae_unclassified	Prymnesiophyceae_unclassified	Prymnesiophyceae_unclassified
OTU_1928	0	0	4.02e-05	6.94e-05	5.99e-05	0.000421158	0.00139005	0.000478517	0	0	0.000139256	0.000253596	0.00027059	0.000108008	0.000458069	0.00116861	0.00132719	0.00238968	0	0	0	3.91e-05	4.83e-05	0.000300687	0	5.04e-05	0	6.28e-05	0	0	0	0	2.21e-05	5.23e-05	1.61e-05	3.41e-05	7.48e-05	Eukaryota	Stramenopiles	Ochrophyta	Bacillariophyta	Bacillariophyta_X	Polar-centric-Mediophyceae	Chaetoceros_neogracile
OTU_40	0.00263686	0.00337245	4.02e-05	6.94e-05	0	0	0	0	6.99e-05	0.00155332	2.79e-05	0	0	0	3.52e-05	0	0	0	0.000195612	0.000202684	0	0	0	0	0	0	0	0	0	0	0	0	0	0	0	0	0	Eukaryota	Stramenopiles	Ochrophyta	Chrysophyceae	Chrysophyceae_X	Chrysophyceae_X_unclassified	Chrysophyceae_X_unclassified
OTU_316	0.00242711	0.00157381	4.02e-05	6.94e-05	0	0	0	0	0.000111858	0.000631037	0.000139256	2.31e-05	0	0	0	0	0	0	0.000489029	1.45e-05	0.00466751	0.00109566	0	0	0	0	0	0	4.65e-05	0	0	0	0	0	0	0	0	Eukaryota	Stramenopiles	Stramenopiles_X	MAST	MAST-2	MAST-2A	MAST-2A_X_sp.
OTU_1091	0	0	4.02e-05	6.94e-05	0.00173845	0.000785622	0	0	0	0	8.36e-05	0.000115271	0.00234986	0.0028545	0.00304792	0.00670412	0.00319572	0.000283221	0	0	0	0	0	0	0	0	0	0	0	0	0	0	0	0	0	0	0	Eukaryota	Hacrobia	Telonemia	Telonemia_X	Telonemia_XX	Telonemia-Group-2	Telonemia-Group-2_X_sp.
OTU_824	0	0	4.02e-05	6.94e-05	0.000389653	0.000437357	0	0	0	0	0	0	0	0	0	0	0	0	0	0	0	0	0	0	0	0	0	0	0	0	0	0	0	0	0	0	0	Eukaryota	Hacrobia	Telonemia	Telonemia_X	Telonemia_XX	Telonemia-Group-2	Telonemia-Group-2_X_sp.
OTU_5323	0	0	4.02e-05	6.94e-05	0	8.1e-06	1.99e-05	0	0	0	0	2.31e-05	7.12e-05	3.09e-05	0.000352361	0	0.000122241	0.000212416	0	0	0	0	0	0	1.37e-05	0.000100876	0.000208019	0.000109964	0.000294702	2.1e-05	0.000110846	0.000216779	0.000221131	8.72e-05	0.000370758	0.000579345	0.000205704	Eukaryota	Hacrobia	Telonemia	Telonemia_X	Telonemia_XX	Telonemia-Group-2	Telonema_antarcticum
OTU_1851	0	0	2.01e-05	6.94e-05	3e-05	8.1e-06	1.99e-05	0	0	0	0	0	0.000256348	0.000108008	3.52e-05	0.000184517	6.99e-05	3.54e-05	0	0	0	0	0	0	8.2e-05	0.000100876	0.000138679	0.000157092	0.000186127	0.00415094	0.00110846	0.00372137	0.000243244	0.000575625	4.84e-05	0.00039191	0.000130902	Eukaryota	Rhizaria	Cercozoa	Filosa-Thecofilosea	Cryomonadida	Protaspa-lineage	Protaspa-lineage_unclassified
OTU_295	0.00179786	0.000786906	2.01e-05	6.94e-05	0	0	0	0	0	0	0.000167108	2.31e-05	0	0	0	0	0	0	0	0	0	0	0	0	0	0	0	0	0	0	0	0	0	0	0	0	0	Eukaryota	Rhizaria	Cercozoa	Filosa-Imbricatea	Thaumatomonadida	Peregriniidae	Peregrinia_sp.
OTU_10319	0	0	2.01e-05	6.94e-05	0.000329707	0.000242976	0	5.04e-05	0	0	0	0	7.12e-05	1.54e-05	0	0	0	3.54e-05	0	0	0	0	1.61e-05	0	0	0	0	0	0	4.19e-05	0	1.81e-05	0	3.49e-05	1.61e-05	5.11e-05	1.87e-05	Eukaryota	Archaeplastida	Chlorophyta	Mamiellophyceae	Mamiellales	Mamiellaceae	Micromonas_unclassified
OTU_2709	0	0	2.01e-05	6.94e-05	0.00017984	3.24e-05	3.97e-05	5.04e-05	0	0	0.000501323	0.00016138	0.000427247	0.000293165	0.000599013	0.000225521	0.000541352	0.000424831	0	0	0	1.96e-05	3.22e-05	1.43e-05	0.000191364	5.04e-05	0.000277359	0.000109964	0.000279191	0.000838574	0.000387962	0.000379363	0.00106143	0.000401193	0.00108004	0.000357831	0.000467508	Eukaryota	Archaeplastida	Chlorophyta	Mamiellophyceae	Mamiellales	Mamiellaceae	Micromonas_polaris
OTU_1622	0	0	2.01e-05	6.94e-05	0	0	3.97e-05	0	0	0	0.000696282	0.000345813	0.000156657	0.000231446	0.000352361	8.2e-05	0.000366723	0.000354026	0	0	0	0	1.61e-05	2.86e-05	0.000150357	3.36e-05	0.000346699	0.000125674	0.000232659	0.000859539	0.000166269	0.000289038	0.000552828	0.000366307	0.000596437	0.000289672	0.000299205	Eukaryota	Archaeplastida	Chlorophyta	Mamiellophyceae	Mamiellales	Mamiellaceae	Micromonas_unclassified
OTU_1158	0	0	2.01e-05	6.94e-05	0.000599466	0.00070463	0.00109218	0.000604443	0	0	0.000417769	0.00156769	0.00156657	0.00138868	0.00540874	0.00309579	0.0104079	0.00293842	0	0	0	0	0	4.3e-05	0.000287046	0.00158039	0.00695131	0.00120961	0.0100819	0.00280922	0.0110846	0.00827372	0.00917695	0.014879	0.00712501	0.01508	0.00738663	Eukaryota	Opisthokonta	Choanoflagellida	Choanoflagellatea	Acanthoecida	Stephanoecidae_Group_D	Stephanoecidae_Group_D_X_sp.
OTU_20593	0	0	2.01e-05	6.94e-05	0.000239787	0.000526448	3.97e-05	5.04e-05	0	0	0	0	0	4.63e-05	0	0	1.75e-05	1.77e-05	0	0	0	0	0	0	0	0	5.2e-05	0	6.2e-05	2.1e-05	0.000138558	3.61e-05	4.42e-05	0.000156989	1.61e-05	0.000119277	1.87e-05	Eukaryota	Opisthokonta	Choanoflagellida	Choanoflagellatea	Acanthoecida	Stephanoecidae_Group_D	Stephanoecidae_Group_D_X_sp.
OTU_1378	8.99e-05	0.000494627	2.01e-05	6.94e-05	0	0	0	0	0	0	0	0	0	0	0	0	0	0	0	0	0	0	0	0	0	0	0	0	0	0	0	0	0	0	0	0	0	Eukaryota	Opisthokonta	Choanoflagellida	Choanoflagellatea	Choanoflagellatea_X	Choanoflagellatea_X_Group_L	Choanoflagellatea_X_Group_L_X_sp.
OTU_206	0	0	2.01e-05	6.94e-05	0.000119893	0.000332067	0.0104452	0.0155392	0	0	0.000557025	0.00119882	1.42e-05	1.54e-05	1.76e-05	0.000225521	1.75e-05	0.000230117	0	0	0	1.96e-05	0	0	1.37e-05	0.000285815	0.00443774	0.000141383	0.00127187	0.000209644	0.00130244	0.000686466	0.000928751	0.00151756	0.00399774	0.00126093	0.00512389	Eukaryota	Alveolata	Ciliophora	Spirotrichea	Strombidiida	Strombidiida_unclassified	Strombidiida_unclassified
OTU_41	0	0	2.01e-05	6.94e-05	0	0.000121488	7.94e-05	0.000352592	0	0	8.36e-05	0.00147547	1.42e-05	6.17e-05	0	0.000123011	0.000244482	0.000442533	0	0	0	0.000391305	0.000209094	0.00018614	0.00047841	0.00031944	0.000901416	0.000157092	0.000124085	0.000440252	0.000193981	0.000343233	0.000420149	0.000627954	0.00124124	0.000408949	0.000261805	Eukaryota	Alveolata	Ciliophora	Spirotrichea	Strombidiida	Strombidiida_unclassified	Strombidiida_unclassified
OTU_11321	0	0	2.01e-05	6.94e-05	0	0	0	0	0	0	0	0	0	1.54e-05	0	0	0	1.77e-05	0	0	0	0	0	0	0	8.41e-05	0.000121344	0.000109964	0	4.19e-05	5.54e-05	1.81e-05	2.21e-05	0.000122102	4.84e-05	0.000170395	1.87e-05	Eukaryota	Alveolata	Ciliophora	Spirotrichea	Strombidiida	Strombidiida_unclassified	Strombidiida_unclassified
OTU_6793	0.000958859	0.00051711	2.01e-05	6.94e-05	0	0	0	0	0	0	0	0	0	0	0	0	0	0	0	0	0	0	0	0	0	0	0	0	0	0	0	0	0	0	0	0	0	Eukaryota	Alveolata	Ciliophora	Spirotrichea	Tintinnida	Tintinnidiidae	Tintinnidium_unclassified
OTU_2359	8.99e-05	0.000674491	2.01e-05	6.94e-05	0	0	0	0	0	0	0	0	0	0	0	0	0	0	0	0	0	0	0	0	0	0	0	0	0	0	0	0	0	0	0	0	0	Eukaryota	Alveolata	Ciliophora	Spirotrichea	Strombidiida	Strombidiida_unclassified	Strombidiida_unclassified
OTU_3235	0	0	2.01e-05	6.94e-05	0.00146869	0.00107719	0	2.52e-05	0	0	0	0	0.000284831	0.000617189	0	0.000287026	3.49e-05	0	0	0	0	0	0	0	0	3.36e-05	0	3.14e-05	0	2.1e-05	0	3.61e-05	0	1.74e-05	0	0	0	Eukaryota	Alveolata	Dinoflagellata	Dinophyceae	Dinophyceae_unclassified	Dinophyceae_unclassified	Dinophyceae_unclassified
OTU_5082	0	0	2.01e-05	6.94e-05	5.99e-05	2.43e-05	0	2.52e-05	0	0	0	9.22e-05	0	3.09e-05	0	0.000410038	0	0	0	0	0	0	0	0	1.37e-05	5.04e-05	1.73e-05	0	4.65e-05	2.1e-05	2.77e-05	0	0	0.000156989	1.61e-05	0.000102237	7.48e-05	Eukaryota	Alveolata	Dinoflagellata	Dinophyceae	Dinophyceae_unclassified	Dinophyceae_unclassified	Dinophyceae_unclassified
OTU_450	0	0	2.01e-05	6.94e-05	3e-05	5.67e-05	7.94e-05	5.04e-05	0	0	0	6.92e-05	0.00018514	0.000200586	1.76e-05	0.000287026	6.99e-05	0	0	0	5.49e-05	0	0	0	0	3.36e-05	0.000121344	4.71e-05	1.55e-05	0	0.000110846	3.61e-05	8.85e-05	0.000139545	1.61e-05	3.41e-05	3.74e-05	Eukaryota	Alveolata	Dinoflagellata	Dinophyceae	Dinophyceae_unclassified	Dinophyceae_unclassified	Dinophyceae_unclassified
OTU_21862	0	0	2.01e-05	6.94e-05	0	4.86e-05	3.97e-05	0	0	0	0	4.61e-05	0.000142416	0.000308594	5.29e-05	0.000881581	0.000506426	1.77e-05	0	0	0	0	0	0	0	0	0	0	0	0	0	1.81e-05	0	0	0	0	0	Eukaryota	Alveolata	Dinoflagellata	Dinophyceae	Gymnodiniales	Gymnodiniaceae	Gymnodinium_unclassified
OTU_6594	0	0	2.01e-05	6.94e-05	0	1.62e-05	9.93e-05	0.000125926	0	0	0	2.31e-05	5.7e-05	4.63e-05	0	2.05e-05	3.49e-05	1.77e-05	0	0	0	0	0	0	1.37e-05	0	0	6.28e-05	1.55e-05	2.1e-05	0	1.81e-05	0	5.23e-05	0	1.7e-05	0	Eukaryota	Alveolata	Dinoflagellata	Dinophyceae	Gymnodiniales	Gymnodiniaceae	Gyrodinium_helveticum
OTU_1628	0	0	2.01e-05	6.94e-05	0.000149867	0.000728928	0	0	0	0	0	0	0.000356039	0.000324024	0.000440451	4.1e-05	6.99e-05	0	0	0	0	0	0	0	0	0	0	0	0	0	0	0	0	0	0	0	0	Eukaryota	Hacrobia	Haptophyta	Prymnesiophyceae	Prymnesiales	Chrysochromulinaceae	Chrysochromulina_leadbeateri
OTU_5707	0	0	0	6.94e-05	0	2.43e-05	0.000158863	0.000302221	0	0	0	0	0	1.54e-05	0	0	0	0	0	0	0	0	0	0	0	0	3.47e-05	3.14e-05	3.1e-05	0	2.77e-05	0.000216779	2.21e-05	0.000470966	1.61e-05	0.000187435	0.000261805	Eukaryota	Alveolata	Alveolata_unclassified	Alveolata_unclassified	Alveolata_unclassified	Alveolata_unclassified	Alveolata_unclassified
OTU_712	0	0	0	6.94e-05	0	4.05e-05	0	0	0	0	0.000974795	0.00101439	0.00249227	0.00146582	0.0034179	0.00043054	0.00165898	0.00166392	0	0	0	3.91e-05	0.00115806	0.000128866	0.00261075	0.00549774	0.0103316	0.00936268	0.00840675	0.0113627	0.00523749	0.00419105	0.000154792	0.00134312	9.67e-05	0.00294784	0.000112202	Eukaryota	Rhizaria	Cercozoa	Filosa-Thecofilosea	Cryomonadida	Protaspa-lineage	Protaspa-lineage_X_sp.
OTU_3546	0.000569323	0.000899321	0	6.94e-05	0	0	0	0	0	7.28e-05	0.000111405	4.61e-05	0	0	0	0	0	0	0.000358622	0	7.32e-05	0	0	0	0	0	0	0	0	0	0	0	0	0	0	0	0	Eukaryota	Rhizaria	Cercozoa	Cercozoa_X	Cercozoa_XX	Cercozoa_XXX	Cercozoa_XXXX_sp.
OTU_11611	0	0	0	6.94e-05	0.0004496	0.00115009	0	0	0	0	0	0	0	0	0	0	0	0	0	0	0	0	0	0	0	0	0	0	0	0	0	0	0	0	0	0	0	Eukaryota	Alveolata	Ciliophora	CONTH_8	CONTH_8_X	CONTH_8_XX	CONTH_8_XXX_sp.
OTU_4230	0	0	0	6.94e-05	5.99e-05	3.24e-05	3.97e-05	0.000151111	0	0	0	0	0	0	0	0	0	1.77e-05	0	0	0	0	0	0	0	0	0	0	0	0	0	0	0	0	0	0	0	Eukaryota	Alveolata	Ciliophora	Spirotrichea	Choreotrichida	Leegaardiellidae_B	Leegaardiella_sp.
OTU_2376	0	0	0	6.94e-05	0	0	7.94e-05	0.00010074	0	0	0	2.31e-05	0	1.54e-05	0	0	0	1.77e-05	0	0	0	0	4.83e-05	0	0	0	1.73e-05	1.57e-05	3.1e-05	0	0	0	0	5.23e-05	1.61e-05	0	0	Eukaryota	Alveolata	Ciliophora	Litostomatea	Haptoria_4	Didiniidae	Didiniidae_unclassified
OTU_3648	0	0	0	6.94e-05	0	0	0	0	0	0	2.79e-05	2.31e-05	0	0	0	0	0	0	0	0	0	0	0	0	0	1.68e-05	1.73e-05	4.71e-05	4.65e-05	0	0	1.81e-05	4.42e-05	8.72e-05	1.61e-05	0	1.87e-05	Eukaryota	Alveolata	Ciliophora	Spirotrichea	Strombidiida	Strombidiidae_R	Strombidium_biarmatum
OTU_6120	0	0	0	6.94e-05	0	0	0	0	0	0	0	2.31e-05	0	0	0	0	0	0	0	0	0	0	0	0	0	0	0	0	0	0	0	0	0	0	0	0	0	Eukaryota	Alveolata	Ciliophora	Spirotrichea	Spirotrichea_unclassified	Spirotrichea_unclassified	Spirotrichea_unclassified
OTU_277	0.00182782	0.00182113	0	6.94e-05	0	0	0	0	0	0	0	0	0	0	0	0	0	0	0	0	0	0	0	0	0	0	0	0	0	0	0	0	0	0	0	0	0	Eukaryota	Alveolata	Ciliophora	Spirotrichea	Choreotrichida	Choreotrichida_unclassified	Choreotrichida_unclassified
OTU_4958	0	0	0	6.94e-05	0.00125888	0.000534547	3.97e-05	2.52e-05	0	0	0	0.000391922	4.27e-05	9.26e-05	3.52e-05	0.000348532	0.000541352	0.00014161	0	0	0	0	0	0	8.2e-05	5.04e-05	0.000156014	4.71e-05	6.2e-05	0.000167715	0.000166269	0.000686466	2.21e-05	0.000470966	0.000499718	0.000562305	0.000130902	Eukaryota	Alveolata	Dinoflagellata	Dinophyceae	Gymnodiniales	Gymnodiniaceae	Gymnodiniaceae_unclassified
OTU_3851	0	0	0	6.94e-05	0.000149867	1.62e-05	0.000258152	0.000428147	0	0	0	0	0	1.54e-05	0	0	1.75e-05	0	0	0	0	0	0	0	0	0	1.73e-05	0	0	0	0	0	0	1.74e-05	1.61e-05	0	7.48e-05	Eukaryota	Alveolata	Dinoflagellata	Dinophyceae	Dinophyceae_unclassified	Dinophyceae_unclassified	Dinophyceae_unclassified
OTU_15661	0	2.25e-05	0	6.94e-05	8.99e-05	0.000145786	0.000119147	0.00010074	0	0	0	0	0	0	0	0	0	0	0	0	0	0	0	0	0	0	0	0	0	0	0	0	0	0	0	0	0	Eukaryota	Alveolata	Dinoflagellata	Dinophyceae	Gymnodiniales	Gymnodiniaceae	Gyrodinium_unclassified
OTU_2286	0	0	0	6.94e-05	5.99e-05	3.24e-05	0	0	0	0	0	4.61e-05	7.12e-05	0	0	2.05e-05	0	0	0	0	0	1.96e-05	3.22e-05	0	2.73e-05	0.000184939	5.2e-05	0	0	0.000104822	8.31e-05	0.000252908	0	1.74e-05	0	3.41e-05	0	Eukaryota	Alveolata	Dinoflagellata	Dinophyceae	Peridiniales	Heterocapsaceae	Heterocapsa_rotundata
OTU_4893	0	0	0	6.94e-05	0	4.86e-05	0	0	0	0	0	0	0.000227865	3.09e-05	1.76e-05	0	3.49e-05	1.77e-05	0	0	0	0	1.61e-05	2.86e-05	2.73e-05	3.36e-05	0.000242689	7.85e-05	0.000124085	0.00033543	0.000277116	0.00074066	0	0	1.61e-05	0.000119277	0	Eukaryota	Alveolata	Dinoflagellata	Dinophyceae	Peridiniales	Heterocapsaceae	Heterocapsa_rotundata
OTU_6255	0.000779073	0.000786906	0	6.94e-05	0	0	0	0	0.0022931	0.00497549	0	0	0	0	1.76e-05	0	0	0	0	0.000173729	0	0	1.61e-05	0	0	0	0	0	0	0	0	0	0	0	0	0	0	Eukaryota	Alveolata	Dinoflagellata	Dinophyceae	Dinophyceae_unclassified	Dinophyceae_unclassified	Dinophyceae_unclassified
OTU_22601	0	2.25e-05	0	6.94e-05	3e-05	2.43e-05	1.99e-05	0	0	0	0	6.92e-05	0.000142416	0.000108008	0.000229035	8.2e-05	1.75e-05	0.000194714	0	0	0	0	0	0	0	0.000168127	0.000173349	0	0.000124085	2.1e-05	0.000138558	3.61e-05	0.000132679	5.23e-05	0.000209559	3.41e-05	0.000205704	Eukaryota	Eukaryota_unclassified	Eukaryota_unclassified	Eukaryota_unclassified	Eukaryota_unclassified	Eukaryota_unclassified	Eukaryota_unclassified
OTU_682	0.000659216	0.00107919	0	6.94e-05	0	0	0	0	1.4e-05	0.00128634	0.000417769	4.61e-05	0	0	0	0	0	0	0	2.9e-05	0	0	0	0	0	0	0	0	0	0	0	0	0	0	0	0	0	Eukaryota	Eukaryota_unclassified	Eukaryota_unclassified	Eukaryota_unclassified	Eukaryota_unclassified	Eukaryota_unclassified	Eukaryota_unclassified
OTU_138	0.000569323	0.00152885	0	6.94e-05	0	0	0	0	0	0.000145624	0	0	0	0	0	0	0	0	0	0	0	0	0	0	0	0	0	0	0	0	0	0	0	0	0	0	0	Eukaryota	Eukaryota_unclassified	Eukaryota_unclassified	Eukaryota_unclassified	Eukaryota_unclassified	Eukaryota_unclassified	Eukaryota_unclassified
OTU_1338	0	0	0	6.94e-05	0.000659413	0.000259174	0.000714881	0.000780738	1.4e-05	0	0.000139256	6.92e-05	0.00018514	0.000308594	0.000246653	0.000266525	0.00082076	0.000123909	0	0	0	0	0	0	0	1.68e-05	0	0	0	0	8.31e-05	3.61e-05	0.000265358	3.49e-05	6.45e-05	1.7e-05	0.000112202	Eukaryota	Stramenopiles	Ochrophyta	Bolidophyceae	Parmales	Parmales_env_3	Parmales_env_3B_sp.
OTU_4639	0	0	0	6.94e-05	0	1.62e-05	0	0	0	0	2.79e-05	0	0	0	0	0	0	0	0	0	0	0	0	0	6.83e-05	6.73e-05	0.00010401	1.57e-05	9.31e-05	8.39e-05	5.54e-05	0	0	1.74e-05	0	3.41e-05	0	Eukaryota	Stramenopiles	Ochrophyta	Bacillariophyta	Bacillariophyta_X	Polar-centric-Mediophyceae	Chaetoceros_brevis
OTU_1150	0.00122854	0.00051711	0	6.94e-05	0	0	0	0	0.000755044	0.0108247	0.000362067	4.61e-05	0	0	0	0	0	0	0	0.00112924	0	1.96e-05	0	0	0	0	0	0	0	0	0	0	0	0	0	0	0	Eukaryota	Stramenopiles	Ochrophyta	Ochrophyta_unclassified	Ochrophyta_unclassified	Ochrophyta_unclassified	Ochrophyta_unclassified
OTU_630	0.00020975	0.000202347	0	6.94e-05	0	0	0	0	0.00223717	0.00842192	0.000473472	0.000207488	1.42e-05	0	0	0	0	0	0.000228214	0.000304026	9.15e-05	0	0	0	0	0	0	0	0	0	0	0	0	0	0	0	0	Eukaryota	Stramenopiles	Ochrophyta	Chrysophyceae	Chrysophyceae_X	Chrysophyceae_X_unclassified	Chrysophyceae_X_unclassified
OTU_123	0.000119857	0.000359728	0	6.94e-05	0	0	0	0	0	2.43e-05	0	0	0	0	0	0	0	0	9.78e-05	0	0.00078707	0.000821741	0.000595114	0.000300687	0.000136689	5.04e-05	0	1.57e-05	1.55e-05	0	0	0	0	0	0	0	0	Eukaryota	Stramenopiles	Ochrophyta	Bacillariophyta	Bacillariophyta_X	Polar-centric-Mediophyceae	Urosolenia_eriensis
OTU_5659	0.000419501	4.5e-05	0	6.94e-05	0	0	0	0	0	0	0	0	0	0	0	0	0	0	0	0	0	0	0	0	0	0	0	0	0	0	0	0	0	0	0	0	0	Eukaryota	Stramenopiles	Ochrophyta	Synurophyceae	Synurales	Synurales_X	Mallomonas_caudata
OTU_15613	0	0	0.000442505	5.21e-05	0.000779306	0.00150645	0	0	0	0	0	0	0.000113933	0.000432032	1.76e-05	0.00032803	0	1.77e-05	0	0	0	0	0	0	0	0	0	0	0	0	0	0	0	0	0	0	0	Eukaryota	Alveolata	Dinoflagellata	Dinophyceae	Gymnodiniales	Gymnodiniaceae	Balechina_pachydermata
OTU_1500	0	0	0.000321822	5.21e-05	3e-05	8.1e-06	0	0	0	0	2.79e-05	0.000115271	2.85e-05	0.000138867	0	2.05e-05	0	3.54e-05	0	0	0	0	0.000112589	0	0.000136689	0.000706132	0.000502713	1.57e-05	0.000201638	6.29e-05	0.000443385	3.61e-05	0.000110566	0.000104659	0.000225679	6.82e-05	0.000130902	Eukaryota	Alveolata	Ciliophora	Spirotrichea	Strombidiida	Strombidiida_unclassified	Strombidiida_unclassified
OTU_1370	0	0	0.000241366	5.21e-05	0.00113899	0.000242976	0	0	0	0	8.36e-05	2.31e-05	0.00091146	0.000401173	0.000440451	0.000348532	0.000122241	3.54e-05	0	0	0	0	0	0	0	1.68e-05	0	1.57e-05	1.55e-05	0.000104822	8.31e-05	3.61e-05	2.21e-05	8.72e-05	0	3.41e-05	0	Eukaryota	Archaeplastida	Chlorophyta	Mamiellophyceae	Dolichomastigales	Crustomastigaceae	Crustomastigaceae_unclassified
OTU_23134	0	2.25e-05	0.000241366	5.21e-05	0.00053952	0.000769424	0.000258152	0.000151111	0	4.85e-05	2.79e-05	0.00304316	0.0078471	0.00470606	0.00258985	0.00455142	0.000209556	0.00286761	0	0	0	0	4.83e-05	0	0.000177695	0.000907883	0.00102276	0.000486985	0.00186127	0.000754717	0.0019121	0.000343233	0.001172	0.00172687	0.00128959	0.00134612	0.00295465	Eukaryota	Alveolata	Dinoflagellata	Dinophyceae	Dinophyceae_unclassified	Dinophyceae_unclassified	Dinophyceae_unclassified
OTU_21645	0	0	0.000241366	5.21e-05	0.000119893	0.000218678	0	0	0	0	0	0	1.42e-05	1.54e-05	0	2.05e-05	3.49e-05	1.77e-05	0	0	0	0	0	0	0	0	0	0	0	2.1e-05	0	0	0	1.74e-05	0	0	0	Eukaryota	Alveolata	Dinoflagellata	Dinophyceae	Gymnodiniales	Gymnodiniaceae	Gyrodinium_helveticum
OTU_4494	0	0	0.000201138	5.21e-05	0	0	0	0	0	0	0	4.61e-05	0	0	0	0	0	0	0	0	0	0	0	0	1.37e-05	5.04e-05	6.93e-05	0.000219929	0.000108574	2.1e-05	0.000249404	0	0	0	0	0	0	Eukaryota	Alveolata	Ciliophora	Spirotrichea	Strombidiida	Strombidiidae_R	Strombidium_biarmatum
OTU_2991	0	0	0.000201138	5.21e-05	3e-05	4.05e-05	0	5.04e-05	0	0	0	0.000253596	4.27e-05	6.17e-05	1.76e-05	4.1e-05	0	5.31e-05	0	0	0	0	3.22e-05	0	0.000177695	0.000891071	0.000832077	0.000172801	0.000341233	0.000230608	0.000637366	1.81e-05	6.63e-05	0.000174432	0.000290159	0.000323751	3.74e-05	Eukaryota	Alveolata	Dinoflagellata	Dinophyceae	Dinophyceae_unclassified	Dinophyceae_unclassified	Dinophyceae_unclassified
OTU_5819	3e-05	0	0.000201138	5.21e-05	0	0	0	2.52e-05	0	0	0	2.31e-05	8.54e-05	9.26e-05	1.76e-05	0	3.49e-05	1.77e-05	0	0	0	0	0	0	0	0	3.47e-05	6.28e-05	7.76e-05	0	0	9.03e-05	0	0	1.61e-05	3.41e-05	1.87e-05	Eukaryota	Alveolata	Dinoflagellata	Dinophyceae	Peridiniales	Heterocapsaceae	Heterocapsa_unclassified
OTU_4638	0	0	0.000181025	5.21e-05	8.99e-05	8.1e-06	0	0	0	0	0	0	1.42e-05	0	0	0	0	0	0	0	0	0	0	0	0.000205033	0.000134501	5.2e-05	0.000125674	4.65e-05	4.19e-05	2.77e-05	0	0	8.72e-05	4.84e-05	6.82e-05	1.87e-05	Eukaryota	Alveolata	Ciliophora	Spirotrichea	Strombidiida	Strombidiidae_R	Strombidium_biarmatum
OTU_21525	0	0	0.000181025	5.21e-05	0.000299733	0.000259174	9.93e-05	0.000151111	0	2.43e-05	0	0	0.000170899	0.000185157	3.52e-05	0.000143513	3.49e-05	3.54e-05	0	0	0	0	0	0	0	5.04e-05	1.73e-05	6.28e-05	4.65e-05	0.000104822	0.000110846	9.03e-05	8.85e-05	6.98e-05	1.61e-05	5.11e-05	5.61e-05	Eukaryota	Alveolata	Dinoflagellata	Dinophyceae	Dinophyceae_unclassified	Dinophyceae_unclassified	Dinophyceae_unclassified
OTU_3160	0	0	0.000181025	5.21e-05	3e-05	8.1e-06	0	0	0	0	0	4.61e-05	0.000113933	9.26e-05	0	0	1.75e-05	0.000123909	0	0	0	1.96e-05	1.61e-05	0	1.37e-05	3.36e-05	0.000138679	3.14e-05	4.65e-05	0.000377358	5.54e-05	0.000307103	2.21e-05	3.49e-05	3.22e-05	6.82e-05	1.87e-05	Eukaryota	Alveolata	Dinoflagellata	Dinophyceae	Peridiniales	Heterocapsaceae	Heterocapsa_rotundata
OTU_15820	0	0	0.000181025	5.21e-05	0	0	0	0	0	0	0	0	7.12e-05	0	0	0	0	0	0	0	0	0	0	0	1.37e-05	0	1.73e-05	0	4.65e-05	4.19e-05	0	3.61e-05	0	0	0	0	0	Eukaryota	Alveolata	Dinoflagellata	Dinophyceae	Peridiniales	Peridiniales_unclassified	Peridiniales_unclassified
OTU_12492	0.00020975	2.25e-05	0.000181025	5.21e-05	0	0	0	0	0	0	0	0	0	1.54e-05	0	0	0	0	0	0	0	0	0	0	0	0	0	0	0	0	0	0	0	0	0	0	0	Eukaryota	Eukaryota_unclassified	Eukaryota_unclassified	Eukaryota_unclassified	Eukaryota_unclassified	Eukaryota_unclassified	Eukaryota_unclassified
OTU_14999	0.000179786	0.000247313	0.000160911	5.21e-05	0	0	0	0	0.000293628	0.00135916	0	2.31e-05	0	0	0	0	0	0	3.26e-05	0.000231639	0	0	0	0	0	0	0	0	0	0	0	0	0	0	0	0	0	Eukaryota	Stramenopiles	Ochrophyta	Chrysophyceae	Chrysophyceae_X	Chrysophyceae_Clade-C	Chrysophyceae_Clade-C_unclassified
OTU_2488	0	0	0.000140797	5.21e-05	0	0	0	0	0	0	0	0	0	0	0	0	0	3.54e-05	0	0	0	0	0	0	1.37e-05	0.000269003	0.000606722	4.71e-05	0.000108574	0	0.000748213	0	0.000154792	8.72e-05	0.000451358	0.000187435	0.000224404	Eukaryota	Alveolata	Alveolata_unclassified	Alveolata_unclassified	Alveolata_unclassified	Alveolata_unclassified	Alveolata_unclassified
OTU_728	0	6.74e-05	0.000140797	5.21e-05	0	0	0	0	0.000111858	0.000145624	0.00261802	0.000576356	0.000156657	6.17e-05	3.52e-05	0	0.000104778	1.77e-05	0.00322759	0	1.83e-05	3.91e-05	0	1.43e-05	1.37e-05	0	0	0	0	0	0	0	0	0	0	0	0	Eukaryota	Archaeplastida	Chlorophyta	Ulvophyceae	Ulotrichales	Ulotrichales_X	Ulotrichales_X_unclassified
OTU_23254	0	0	0.000140797	5.21e-05	8.99e-05	0.00010529	0.000258152	0.000201481	0	0	0	0	0.000113933	0.00054004	0	6.15e-05	0	0	0	0	0	0	0	0	0	3.36e-05	1.73e-05	6.28e-05	0	0	0	1.81e-05	0	0	0	1.7e-05	3.74e-05	Eukaryota	Alveolata	Dinoflagellata	Dinophyceae	Dinophyceae_unclassified	Dinophyceae_unclassified	Dinophyceae_unclassified
OTU_668	0.00239715	0.00182113	0.000140797	5.21e-05	0	0	0	0	0.00701911	0.01148	8.36e-05	0	0	0	1.76e-05	0	0	0	3.26e-05	0.000405368	3.66e-05	0	1.61e-05	0	0	0	0	0	0	0	0	0	0	0	0	0	0	Eukaryota	Alveolata	Dinoflagellata	Dinophyceae	Dinophyceae_unclassified	Dinophyceae_unclassified	Dinophyceae_unclassified
OTU_2672	0	0	0.000140797	5.21e-05	0.00467584	0.00285902	3.97e-05	5.04e-05	0	0	0	4.61e-05	0.00131022	0.00243789	7.05e-05	0.00100459	0.000227019	0	0	0	1.83e-05	0	0	0	0	0.000168127	0	0	0	8.39e-05	2.77e-05	0.000126454	0	8.72e-05	0	1.7e-05	0	Eukaryota	Eukaryota_unclassified	Eukaryota_unclassified	Eukaryota_unclassified	Eukaryota_unclassified	Eukaryota_unclassified	Eukaryota_unclassified
OTU_3053	0.000479429	0.000337245	0.000140797	5.21e-05	0	0	0	0	0	0	0	0	0	0	0	0	0	0	0	1.45e-05	0	0	0	0	0	0	0	0	0	0	0	0	0	0	0	0	0	Eukaryota	Eukaryota_unclassified	Eukaryota_unclassified	Eukaryota_unclassified	Eukaryota_unclassified	Eukaryota_unclassified	Eukaryota_unclassified
OTU_4060	0.000779073	0.000382211	0.000140797	5.21e-05	0	0	0	0	0	2.43e-05	0.00044562	4.61e-05	0	0	0	0	0	0	0	0	0	0	0	0	0	0	0	0	0	0	0	0	0	0	0	0	0	Eukaryota	Alveolata	Perkinsea	Perkinsida	Perkinsida_X	Perkinsida_XX	Perkinsida_XXX_sp.
OTU_851	0	0	0.000120683	5.21e-05	0.000779306	0.000348266	1.99e-05	0	0	0	0	0	4.27e-05	4.63e-05	0	2.05e-05	1.75e-05	3.54e-05	0	0	0	0	0	0	0	0	1.73e-05	0	4.65e-05	8.39e-05	2.77e-05	5.42e-05	2.21e-05	8.72e-05	1.61e-05	6.82e-05	3.74e-05	Eukaryota	Archaeplastida	Chlorophyta	Mamiellophyceae	Mamiellales	Mamiellaceae	Micromonas polaris
OTU_2444	0	0	0.000120683	5.21e-05	3e-05	8.1e-06	3.97e-05	0	0	0	2.79e-05	0.000276651	8.54e-05	9.26e-05	8.81e-05	0	6.99e-05	8.85e-05	0	0	0	0	1.61e-05	4.3e-05	0.000697112	0.000201752	0.000676062	0.000738332	0.000822062	0.00129979	0.000748213	0.000162584	0.000972978	0.0007675	0.00111228	0.000732701	0.000187003	Eukaryota	Archaeplastida	Chlorophyta	Mamiellophyceae	Mamiellales	Mamiellaceae	Micromonas_unclassified
OTU_702	0	0	0.000120683	5.21e-05	0	0.000137686	0.000814171	0.00478517	0	0	0	4.61e-05	5.7e-05	0.000169727	0	2.05e-05	0	8.85e-05	0	0	0	0	0	0	0.000314384	0.000168127	6.93e-05	0	3.1e-05	0.000314465	2.77e-05	5.42e-05	4.42e-05	0.000470966	0.000499718	0.000323751	0.000673212	Eukaryota	Alveolata	Ciliophora	Spirotrichea	Choreotrichida	Strobilidiidae_A	Strobilidiidae_A_X_sp.
OTU_13486	0	0	0.000120683	5.21e-05	0	0	0	0	0	0	0	0	0	0	0	0	0	3.54e-05	0	0	0	0	0	0	1.37e-05	0	1.73e-05	1.57e-05	7.76e-05	0	0	0	0	3.49e-05	3.22e-05	0	0	Eukaryota	Alveolata	Ciliophora	Spirotrichea	Strombidiida	Strombidiidae_R	Strombidium_biarmatum
OTU_22212	0	0	0.000120683	5.21e-05	0.000119893	8.91e-05	1.99e-05	0.00010074	0	0	0	0	1.42e-05	3.09e-05	0	4.1e-05	1.75e-05	0	0	0	0	0	0	0	1.37e-05	0.000100876	5.2e-05	4.71e-05	3.1e-05	4.19e-05	2.77e-05	1.81e-05	2.21e-05	6.98e-05	0.000128959	0.000153356	3.74e-05	Eukaryota	Alveolata	Dinoflagellata	Dinophyceae	Dinophyceae_unclassified	Dinophyceae_unclassified	Dinophyceae_unclassified
OTU_4401	0	0	0.000120683	5.21e-05	0	8.1e-06	1.99e-05	2.52e-05	0	0	0	0	0	0	0	0	0	0	0	0	0	0	0	0	0	1.68e-05	3.47e-05	3.14e-05	0	0	0	3.61e-05	0	1.74e-05	1.61e-05	3.41e-05	0	Eukaryota	Alveolata	Dinoflagellata	Dinophyceae	Dinophyceae_unclassified	Dinophyceae_unclassified	Dinophyceae_unclassified
OTU_2016	0.000659216	0.000831872	0.000120683	5.21e-05	0	0	0	0	0	9.71e-05	0	0	0	0	0	0	0	0	0	0	1.83e-05	0	0	0	0	0	0	0	0	0	0	0	0	0	0	0	0	Eukaryota	Alveolata	Dinoflagellata	Dinophyceae	Suessiales	Suessiaceae	Suessiaceae_unclassified
OTU_391	0.00068918	0.000584559	0.000120683	5.21e-05	0	0	0	0	0.000433451	0.000631037	0.000919092	6.92e-05	0	0	0	0	0	0	0.00312979	0.000752827	0.00106163	0.000391305	9.65e-05	0.000114548	4.1e-05	0	0	0	0	0	0	0	0	0	0	0	0	Eukaryota	Stramenopiles	Ochrophyta	Chrysophyceae	Chrysophyceae_X	Chrysophyceae_Clade-C	Dinobryon_divergens
OTU_4947	0	0	0.000100569	5.21e-05	8.99e-05	6.48e-05	0	2.52e-05	0	0	0	0	1.42e-05	1.54e-05	0	0	0	0	0	0	0	0	0	0	0	0	3.47e-05	0	1.55e-05	4.19e-05	0.000138558	0.000270973	0	0.000104659	6.45e-05	1.7e-05	1.87e-05	Eukaryota	Alveolata	Alveolata_unclassified	Alveolata_unclassified	Alveolata_unclassified	Alveolata_unclassified	Alveolata_unclassified
OTU_11357	0	0	0.000100569	5.21e-05	0	8.1e-06	0	0	0	0	0	0	5.7e-05	0.000123438	0	0	0	0	0	0	0	0	0	0	0	0	1.73e-05	0	1.55e-05	8.39e-05	0	0	0	1.74e-05	0	0	0	Eukaryota	Alveolata	Ciliophora	Spirotrichea	Strombidiida_G	Strombidiida_G_X	Strombidium_G_X_unclassified
OTU_15625	0	0	0.000100569	5.21e-05	0.00017984	2.43e-05	0	0	0	0	0	0	0	0	0	2.05e-05	0	0	0	0	0	0	0	0	0	0	0	0	0	0	0	0	2.21e-05	0	0	0	0	Eukaryota	Alveolata	Dinoflagellata	Dinophyceae	Dinophyceae_unclassified	Dinophyceae_unclassified	Dinophyceae_unclassified
OTU_19250	0	0	0.000100569	5.21e-05	0.000119893	8.91e-05	0	0	0	0	0	0	0	1.54e-05	0	2.05e-05	0	0	0	0	0	0	0	0	0	1.68e-05	1.73e-05	1.57e-05	0	0	0	0.000325168	0	0.000104659	0	3.41e-05	0	Eukaryota	Alveolata	Dinoflagellata	Dinophyceae	Gymnodiniales	Gymnodiniaceae	Gymnodiniaceae_unclassified
OTU_7985	0	0	0.000100569	5.21e-05	3e-05	2.43e-05	0	5.04e-05	0	0	0	0	4.27e-05	1.54e-05	0	0	0	1.77e-05	0	0	0	0	0	0	0	0	0	0	0	2.1e-05	0	1.81e-05	2.21e-05	0	1.61e-05	1.7e-05	0	Eukaryota	Alveolata	Dinoflagellata	Dinophyceae	Gymnodiniales	Gymnodiniaceae	Gymnodiniaceae_unclassified
OTU_15814	0	0	0.000100569	5.21e-05	5.99e-05	0.00051025	0	0	0	0	0	2.31e-05	4.27e-05	1.54e-05	0	0.000102509	3.49e-05	1.77e-05	0	0	0	0	0	0	0	0	0	0	0	0	0	0	0	0	0	0	0	Eukaryota	Eukaryota_unclassified	Eukaryota_unclassified	Eukaryota_unclassified	Eukaryota_unclassified	Eukaryota_unclassified	Eukaryota_unclassified
OTU_4997	0	0	0.000100569	5.21e-05	0	9.72e-05	0	0	0	0	0	0	0	0	0	0	0	1.77e-05	0	0	0	0	0	0	0	3.36e-05	0.00010401	1.57e-05	4.65e-05	0	5.54e-05	0	0	0.000174432	1.61e-05	0.000102237	3.74e-05	Eukaryota	Eukaryota_unclassified	Eukaryota_unclassified	Eukaryota_unclassified	Eukaryota_unclassified	Eukaryota_unclassified	Eukaryota_unclassified
OTU_5328	0.000719144	8.99e-05	8.05e-05	5.21e-05	0	0	0	0	0	0	8.36e-05	0	0	0	0	0	0	0	3.26e-05	7.24e-05	0.000384383	0	0	0	0	0	0	0	0	0	0	0	0	0	0	0	0	Eukaryota	Hacrobia	Centroheliozoa	Centroheliozoa_X	Pterocystida	Choanocystidae	Choanocystis_sp.
OTU_462	0.00113864	0.00137147	8.05e-05	5.21e-05	0	0	0	0	0.000167788	0.000485413	0.000417769	4.61e-05	0	0	0	0	0	0	0.000293418	0.000390891	1.83e-05	0	0	0	0	0	0	0	0	0	0	0	0	0	0	0	0	Eukaryota	Archaeplastida	Chlorophyta	Chlorophyceae	Chlamydomonadales	Chlamydomonadales_X	Chlamydomonadales_X_unclassified
OTU_6363	0	0	8.05e-05	5.21e-05	0.00017984	0.000161984	0	0	0	0	0	0	0	7.71e-05	0	0	0	0	0	0	0	0	0	0	0	0	0	0	0	0	0	9.03e-05	0	8.72e-05	0	0	0	Eukaryota	Alveolata	Ciliophora	Spirotrichea	Strombidiida_G	Strombidiida_G_X	Strombidiida_G_X_unclassified
OTU_6330	0	0	8.05e-05	5.21e-05	3e-05	0	0	0	0	0	0	0	0	0	0	0	0	0	0	0	0	0	0	0	0	0	0	0	0	2.1e-05	2.77e-05	9.03e-05	0	3.49e-05	3.22e-05	0	1.87e-05	Eukaryota	Alveolata	Ciliophora	Spirotrichea	Spirotrichea_unclassified	Spirotrichea_unclassified	Spirotrichea_unclassified
OTU_4394	0	0	8.05e-05	5.21e-05	3e-05	0	1.99e-05	2.52e-05	0	0	0	0.000276651	5.7e-05	7.71e-05	0	2.05e-05	0	0.000194714	0	0	0	0	0.000241262	8.59e-05	0.000779125	0.000689319	0.000520048	0.00076975	0.00117881	0.000356394	0.000304827	0.000270973	0.000265358	0.000209318	0.000370758	6.82e-05	9.35e-05	Eukaryota	Hacrobia	Cryptophyta	Cryptophyceae	Cryptophyceae_X	Cryptomonadales	Teleaulax_gracilis
OTU_165	0	0	8.05e-05	5.21e-05	0.000509547	0.00050215	0.000933317	0.000629628	0	0	0.000334215	0.000945223	0.000968426	0.00387286	0.00017618	0.000902083	0.000104778	0.000601844	0	0	0	0	0	0	2.73e-05	0.000151314	0.000832077	4.71e-05	0.000217149	0.000188679	0.000498808	0.000198714	0.000442263	0.00038375	0.000725397	0.00037487	0.000953717	Eukaryota	Alveolata	Dinoflagellata	Dinophyceae	Dinophyceae_unclassified	Dinophyceae_unclassified	Dinophyceae_unclassified
OTU_3696	0	0	8.05e-05	5.21e-05	0.000389653	0.000315869	5.96e-05	7.56e-05	0	0	0	0.000276651	5.7e-05	7.71e-05	0.00017618	6.15e-05	0.000104778	3.54e-05	0	0	0	0	0	0	0	0	0.000277359	3.14e-05	7.76e-05	0.000167715	8.31e-05	5.42e-05	0.000619168	8.72e-05	0.000612557	0.000170395	0.00100982	Eukaryota	Alveolata	Dinoflagellata	Dinophyceae	Peridiniales	Thoracosphaeraceae	Pentapharsodinium_sp.
OTU_21751	0	0	8.05e-05	5.21e-05	8.99e-05	0.000194381	0	0	0	0	0	0	4.27e-05	0	0	0	0	0	0	0	0	0	0	0	0	0	0	0	0	0	0	0	0	0	0	0	0	Eukaryota	Alveolata	Dinoflagellata	Dinophyceae	Dinophyceae_unclassified	Dinophyceae_unclassified	Dinophyceae_unclassified
OTU_3829	0	0	8.05e-05	5.21e-05	5.99e-05	8.1e-05	1.99e-05	0.00010074	0	0	0	2.31e-05	5.7e-05	7.71e-05	0.000123326	2.05e-05	3.49e-05	1.77e-05	0	0	0	0	0	0	0	0	6.93e-05	3.14e-05	3.1e-05	4.19e-05	0.000221693	1.81e-05	0.000110566	8.72e-05	0.000161199	0.000102237	0.000205704	Eukaryota	Alveolata	Dinoflagellata	Dinophyceae	Dinophyceae_unclassified	Dinophyceae_unclassified	Dinophyceae_unclassified
OTU_23036	0	0	8.05e-05	5.21e-05	3e-05	2.43e-05	0	0	0	0	0	0	2.85e-05	1.54e-05	0	0	0	1.77e-05	0	0	0	0	0	0	0	0	0	0	1.55e-05	2.1e-05	5.54e-05	1.81e-05	6.63e-05	1.74e-05	4.84e-05	0	1.87e-05	Eukaryota	Alveolata	Dinoflagellata	Dinophyceae	Dinophyceae_unclassified	Dinophyceae_unclassified	Dinophyceae_unclassified
OTU_3594	0	0	8.05e-05	5.21e-05	0	1.62e-05	0	0	0	0	0	0	0	0	0	0	1.75e-05	0	0	0	0	0	0	0	0.000150357	6.73e-05	0.000121344	0.000141383	3.1e-05	0	2.77e-05	3.61e-05	0	1.74e-05	3.22e-05	5.11e-05	0	Eukaryota	Alveolata	Dinoflagellata	Dinophyceae	Dinophyceae_unclassified	Dinophyceae_unclassified	Dinophyceae_unclassified
OTU_5209	0	0	8.05e-05	5.21e-05	0.000149867	8.1e-05	0	0	0	0	0	0	0	0	0	4.1e-05	0	0	0	0	0	0	0	0	0	0	0	0	0	0	0	1.81e-05	2.21e-05	1.74e-05	0	1.7e-05	0	Eukaryota	Stramenopiles	Ochrophyta	Bacillariophyta	Bacillariophyta_X	Polar-centric-Mediophyceae	Chaetoceros_unclassified
OTU_5472	0.000809037	0.000764423	8.05e-05	5.21e-05	0	0	0	0	8.39e-05	0.00186884	8.36e-05	0	0	0	0	0	0	0	0.000195612	0.000159252	0	0	0	0	0	0	0	0	0	0	0	0	0	0	0	0	0	Eukaryota	Stramenopiles	Ochrophyta	Ochrophyta_unclassified	Ochrophyta_unclassified	Ochrophyta_unclassified	Ochrophyta_unclassified
OTU_1587	0.000149822	8.99e-05	8.05e-05	5.21e-05	0	0	0	0	0.000223717	0.000655308	0.000139256	0	0	0	0	0	0	0	0	0.000159252	0	0	1.61e-05	0	0	0	0	0	0	0	0	0	0	0	0	0	0	Eukaryota	Stramenopiles	Ochrophyta	Chrysophyceae	Chrysophyceae_X	Chrysophyceae_Clade-C	Chrysophyceae_Clade-C_unclassified
OTU_3744	0.000269679	0.000179864	8.05e-05	5.21e-05	0	0	0	0	2.8e-05	4.85e-05	0	0	0	0	0	0	0	0	0	1.45e-05	1.83e-05	0	0	0	0	0	0	0	0	0	0	0	0	0	0	0	0	Eukaryota	Stramenopiles	Ochrophyta	Chrysophyceae	Chrysophyceae_X	Chrysophyceae_X_unclassified	Chrysophyceae_X_unclassified
OTU_1305	0.000629251	0.00114663	6.03e-05	5.21e-05	0	0	0	0	0	0	0	0	0	0	0	0	0	0	0	0	0	0	0	0	0	0	0	0	0	0	0	0	0	0	0	0	0	Eukaryota	Rhizaria	Cercozoa	Cercozoa_unclassified	Cercozoa_unclassified	Cercozoa_unclassified	Cercozoa_unclassified
OTU_17077	0.000149822	0.000292279	6.03e-05	5.21e-05	0	0	0	0	0	0	0	0	0	0	0	0	0	0	0	0	0	0	0	0	0	0	0	0	0	0	0	0	0	0	0	0	0	Eukaryota	Opisthokonta	Choanoflagellida	Choanoflagellida_X	Choanoflagellida_XX	Choanoflagellida_XX_unclassified	Choanoflagellida_XX_unclassified
OTU_1258	0	0	6.03e-05	5.21e-05	3e-05	2.43e-05	0	0	0	0	0	0.000115271	0	0	0	0	0	0.00014161	0	0	0	0	0.000353851	0	0.00060143	0.00181577	0.000762737	0.000377021	0.000558382	0.000754717	0.000304827	0.000108389	0.00035381	0.000244205	0.000531958	0.000289672	0.000261805	Eukaryota	Alveolata	Ciliophora	Spirotrichea	Strombidiida	Strombidiida_unclassified	Strombidiida_unclassified
OTU_12682	0	0	6.03e-05	5.21e-05	0	2.43e-05	1.99e-05	0.000352592	0	0	0	0	2.85e-05	4.63e-05	0	2.05e-05	0	5.31e-05	0	0	0	0	0	0	6.83e-05	6.73e-05	0	0	0	8.39e-05	0	1.81e-05	0	0.000104659	3.22e-05	0.000119277	0	Eukaryota	Alveolata	Ciliophora	Spirotrichea	Choreotrichida	Strobilidiidae_A	Strobilidiidae_A_X_sp.
OTU_10074	0	0	6.03e-05	5.21e-05	0	1.62e-05	0	0	0	0	0	0	0	0	0	2.05e-05	0	1.77e-05	0	0	0	0	0	0	0.000136689	0.000218565	5.2e-05	0.000125674	0.000108574	6.29e-05	0.000138558	5.42e-05	0	0.000122102	3.22e-05	0.000102237	0	Eukaryota	Alveolata	Ciliophora	Spirotrichea	Strombidiida	Strombidiidae_R	Strombidiidae_R_unclassified
OTU_11320	0	0	6.03e-05	5.21e-05	0	0	0	0	0	0	0	2.31e-05	0	0	0	2.05e-05	0	0	0	0	0	0	0	0	1.37e-05	5.04e-05	0.000190684	0	4.65e-05	0	5.54e-05	5.42e-05	2.21e-05	8.72e-05	9.67e-05	6.82e-05	7.48e-05	Eukaryota	Alveolata	Ciliophora	Spirotrichea	Strombidiida	Strombidiida_unclassified	Strombidiida_unclassified
OTU_8614	0	0	6.03e-05	5.21e-05	0	0	0	0	0	0	0	2.31e-05	8.54e-05	0.000108008	0	2.05e-05	0	3.54e-05	0	0	0	0	0	0	0	0	0	0	0	0	0	0.000108389	0	1.74e-05	0	0	0	Eukaryota	Alveolata	Ciliophora	Spirotrichea	Strombidiida	Tontoniidae_A	Laboea_strobila
OTU_5928	0.000779073	0.00175368	6.03e-05	5.21e-05	0	0	0	0	0	0	0	0	0	0	0	0	1.75e-05	0	0.00456427	1.45e-05	0.00909707	7.83e-05	0	5.73e-05	0	0	1.73e-05	0	0	0	0	0	0	0	0	0	0	Eukaryota	Alveolata	Ciliophora	Spirotrichea	Choreotrichida	Strobilidiidae_C	Strobilidiidae_C_X_sp.
OTU_536	0	0	6.03e-05	5.21e-05	0.00548512	0.00357175	1.99e-05	5.04e-05	0	0	0	2.31e-05	0.000427247	0.000648048	1.76e-05	0.000553551	1.75e-05	0	0	0	0	0	0	0	0	0.000151314	0	0	0	2.1e-05	0	0.000144519	0	1.74e-05	0	1.7e-05	0	Eukaryota	Alveolata	Dinoflagellata	Dinophyceae	Dinophyceae_unclassified	Dinophyceae_unclassified	Dinophyceae_unclassified
OTU_2131	0	0	6.03e-05	5.21e-05	0	1.62e-05	0.000158863	0.000125926	0	0	2.79e-05	2.31e-05	0.000113933	7.71e-05	0.000140944	6.15e-05	1.75e-05	0.00014161	0	0	0	0	0	0	2.73e-05	0.000151314	0.000294694	0.000219929	0.000201638	0.000230608	0.000193981	0.000451622	0.000154792	1.74e-05	0.000128959	0.000255593	0.000430108	Eukaryota	Alveolata	Dinoflagellata	Dinophyceae	Dinophyceae_unclassified	Dinophyceae_unclassified	Dinophyceae_unclassified
OTU_5230	8.99e-05	0.000134898	6.03e-05	5.21e-05	0	8.1e-06	0	0	0	7.28e-05	2.79e-05	0	0	0	0	0	0	0	0	0	5.49e-05	0	0	0	0	0	0	0	0	0	0	0	0	0	0	0	0	Eukaryota	Hacrobia	Katablepharidophyta	Katablepharidaceae	Katablepharidales	Katablepharidales_X	Katablepharidales_XX_sp.
OTU_5388	0.000179786	8.99e-05	6.03e-05	5.21e-05	0	0	0	0	1.4e-05	4.85e-05	0	0	0	0	0	0	0	0	0	0	0	0	0	0	0	0	0	0	0	0	0	0	0	0	0	0	0	Eukaryota	Stramenopiles	Ochrophyta	Chrysophyceae	Chrysophyceae_X	Chrysophyceae_Clade-C	Chrysophyceae_Clade-C_unclassified
OTU_4738	3e-05	0	6.03e-05	5.21e-05	0	0	3.97e-05	0	0	0	0	0.000138325	0.000199382	0.000138867	0.00267794	2.05e-05	0.000366723	0.00102668	0	0	0	0	0	0	2.73e-05	0.000184939	0.000190684	0.000157092	0.000372255	4.19e-05	0.000193981	0.000270973	0.000486489	0.000191875	0.000548078	0.000732701	0.000504909	Eukaryota	Hacrobia	Telonemia	Telonemia_X	Telonemia_XX	Telonemia-Group-2	Telonema_antarcticum
OTU_4530	0	0	4.02e-05	5.21e-05	5.99e-05	4.05e-05	7.94e-05	0.000151111	0	0	0	4.61e-05	0	4.63e-05	0	8.2e-05	0	1.77e-05	0	0	0	0	0	0	0	5.04e-05	0.000329364	0	3.1e-05	0	0	0	2.21e-05	3.49e-05	0.000128959	6.82e-05	0.000168303	Eukaryota	Alveolata	Alveolata_unclassified	Alveolata_unclassified	Alveolata_unclassified	Alveolata_unclassified	Alveolata_unclassified
OTU_742	0.00323615	0.00159629	4.02e-05	5.21e-05	3e-05	0	0	0	0	0.000121353	0.00172678	0.000345813	0	1.54e-05	0	0	1.75e-05	0	0	0	0.000146432	1.96e-05	0	0	0	0	0	0	0	0	0	0	0	0	0	0	0	Eukaryota	Rhizaria	Cercozoa	Filosa-Imbricatea	Filosa-Imbricatea_X	Novel-clade-2	Novel-clade-2_X_sp.
OTU_666	0.00107872	0.00121408	4.02e-05	5.21e-05	0	0	0	0	0	0	0.000278513	0.000138325	0	0	0	0	0	0	0	1.45e-05	0	0	0	0	0	0	0	0	0	0	0	0	0	0	0	0	0	Eukaryota	Rhizaria	Cercozoa	Filosa	Filosa_X	Filosa_XX	Filosa_XXX_sp.
OTU_3997	0.000449465	0.000562076	4.02e-05	5.21e-05	0	0	0	0	0	2.43e-05	8.36e-05	0	0	0	0	0	0	0	0	0	0	1.96e-05	0	0	0	0	0	0	0	0	0	0	0	0	0	0	0	Eukaryota	Rhizaria	Cercozoa	Cercozoa_unclassified	Cercozoa_unclassified	Cercozoa_unclassified	Cercozoa_unclassified
OTU_3273	0	0	4.02e-05	5.21e-05	0.000239787	4.86e-05	0.000615592	7.56e-05	0	0	0	2.31e-05	2.85e-05	7.71e-05	7.05e-05	0.000123011	0.000104778	1.77e-05	0	0	0	0	0	0	1.37e-05	0	0.000138679	4.71e-05	1.55e-05	2.1e-05	8.31e-05	0.000144519	8.85e-05	0.000244205	0.00011284	0.000323751	9.35e-05	Eukaryota	Opisthokonta	Choanoflagellida	Choanoflagellatea	Acanthoecida	Stephanoecidae_Group_D	Stephanoecidae_Group_D_X_sp.
OTU_3105	0	0	4.02e-05	5.21e-05	0.000149867	0.000129587	0	0	0	0	0	0	7.12e-05	1.54e-05	0	0	0	0	0	0	0	0	0	0	0	0	1.73e-05	0	1.55e-05	8.39e-05	2.77e-05	0.000433557	0	0.000244205	1.61e-05	3.41e-05	0	Eukaryota	Alveolata	Ciliophora	Spirotrichea	Spirotrichea_unclassified	Spirotrichea_unclassified	Spirotrichea_unclassified
OTU_10162	0	0	4.02e-05	5.21e-05	0	3.24e-05	0	0	0	0	0	0	0	0	0	0	0	1.77e-05	0	0	0	0	0	0	4.1e-05	8.41e-05	0.000208019	0.000282765	0.000108574	0.000146751	8.31e-05	3.61e-05	2.21e-05	0.000261648	3.22e-05	0.000306712	1.87e-05	Eukaryota	Alveolata	Ciliophora	Spirotrichea	Strombidiida	Strombidiida_unclassified	Strombidiida_unclassified
OTU_4251	0	0	4.02e-05	5.21e-05	0	8.1e-06	0	0	0	0	0	0	0	0	5.29e-05	2.05e-05	0	5.31e-05	0	0	0	0	0	0	4.1e-05	0.000269003	0.000329364	0.000282765	0.000217149	8.39e-05	0.000110846	1.81e-05	2.21e-05	0.000122102	4.84e-05	8.52e-05	1.87e-05	Eukaryota	Alveolata	Ciliophora	Spirotrichea	Strombidiida	Strombidiidae_R	Strombidium_biarmatum
OTU_6	0.00137836	0.00191106	4.02e-05	5.21e-05	0	0	0	0	5.59e-05	2.43e-05	0	0	0	0	0	0	0	0	0	0.00056462	0	0	0	0	0	0	0	0	0	0	0	0	0	0	0	0	0	Eukaryota	Alveolata	Ciliophora	Ciliophora_unclassified	Ciliophora_unclassified	Ciliophora_unclassified	Ciliophora_unclassified
OTU_360	0.000479429	0.000472144	4.02e-05	5.21e-05	0	0	0	0	0	2.43e-05	0	0	0	0	0	0	0	0	0	0.00262042	3.66e-05	0	0	0	0	0	0	0	0	0	0	0	0	0	0	0	0	Eukaryota	Alveolata	Ciliophora	Ciliophora_unclassified	Ciliophora_unclassified	Ciliophora_unclassified	Ciliophora_unclassified
OTU_11292	0	0	4.02e-05	5.21e-05	0	0	0	0	0	0	0	2.31e-05	0	0	0	0	0	7.08e-05	0	0	0	0	0.000176926	0	0.000341721	0.000807008	0.000156014	0.000125674	0.000232659	0.000356394	5.54e-05	1.81e-05	0.000154792	5.23e-05	9.67e-05	3.41e-05	0	Eukaryota	Alveolata	Ciliophora	Spirotrichea	Strombidiida	Strombidiidae_R	Strombidium_R_unclassified
OTU_13185	0	0	4.02e-05	5.21e-05	0	0	0	0	0	0	0	0	0	0	0	0	0	0	0	0	0	0	0	0	5.47e-05	3.36e-05	3.47e-05	3.14e-05	7.76e-05	6.29e-05	2.77e-05	1.81e-05	0.000176905	0.000104659	0.000161199	3.41e-05	0	Eukaryota	Alveolata	Ciliophora	Spirotrichea	Strombidiida	Strombidiidae_R	Strombidium_biarmatum
OTU_15628	0	0	4.02e-05	5.21e-05	0.00035968	0.000242976	3.97e-05	0.000151111	0	0	0	4.61e-05	5.7e-05	0.000370313	0	0.000123011	0	1.77e-05	0	0	0	0	0	0	1.37e-05	1.68e-05	3.47e-05	3.14e-05	1.55e-05	0	0.000110846	9.03e-05	2.21e-05	6.98e-05	0	0	0	Eukaryota	Alveolata	Dinoflagellata	Dinophyceae	Dinophyceae_unclassified	Dinophyceae_unclassified	Dinophyceae_unclassified
OTU_14719	0	0	4.02e-05	5.21e-05	0.000209813	4.05e-05	1.99e-05	0	0	0	0	2.31e-05	8.54e-05	9.26e-05	1.76e-05	4.1e-05	1.75e-05	1.77e-05	0	0	0	0	0	0	0	1.68e-05	1.73e-05	1.57e-05	0	6.29e-05	8.31e-05	0	4.42e-05	0	8.06e-05	0	0	Eukaryota	Alveolata	Dinoflagellata	Dinophyceae	Gymnodiniales	Gymnodiniaceae	Gymnodiniaceae_unclassified
OTU_23105	0	0	4.02e-05	5.21e-05	0.00017984	0.000137686	7.94e-05	0	0	0	0	0.000806898	0.00150961	6.17e-05	0.000105708	0.000143513	0	5.31e-05	0	0	0	1.96e-05	0.000289515	0.000171821	0.00103883	0.000638881	0.000190684	0.000141383	0.00026368	0.000440252	0.000138558	0	6.63e-05	8.72e-05	0.000209559	0.000289672	0.000280505	Eukaryota	Alveolata	Dinoflagellata	Dinophyceae	Dinophyceae_unclassified	Dinophyceae_unclassified	Dinophyceae_unclassified
OTU_4571	0	0	4.02e-05	5.21e-05	0.000149867	9.72e-05	0.000258152	0.000226666	0	0	0	4.61e-05	0	3.09e-05	0	4.1e-05	0	0	0	0	0	0	0	0	1.37e-05	6.73e-05	1.73e-05	0	4.65e-05	6.29e-05	0	7.23e-05	0	0.000191875	6.45e-05	3.41e-05	1.87e-05	Eukaryota	Alveolata	Dinoflagellata	Dinophyceae	Gymnodiniales	Gymnodiniaceae	Gyrodinium_helveticum
OTU_21914	0	0	4.02e-05	5.21e-05	8.99e-05	9.72e-05	0.000158863	0.000125926	0	0	0	0	0	4.63e-05	0	8.2e-05	1.75e-05	1.77e-05	0	0	0	0	0	0	0	0	6.93e-05	1.57e-05	3.1e-05	0	0	1.81e-05	0	3.49e-05	0	1.7e-05	0	Eukaryota	Alveolata	Dinoflagellata	Dinophyceae	Gymnodiniales	Gymnodiniaceae	Gyrodinium_helveticum
OTU_21960	0	0	4.02e-05	5.21e-05	5.99e-05	1.62e-05	0.000158863	7.56e-05	0	0	2.79e-05	0.000184434	0.000142416	0.000324024	0	6.15e-05	6.99e-05	0.000106208	0	0	0	0	0	0	0	0.000134501	0.000190684	6.28e-05	0.000217149	4.19e-05	0.000304827	1.81e-05	0.000132679	6.98e-05	0.000274039	3.41e-05	0.000112202	Eukaryota	Alveolata	Dinoflagellata	Dinophyceae	Dinophyceae_unclassified	Dinophyceae_unclassified	Dinophyceae_unclassified
OTU_5428	0	0	4.02e-05	5.21e-05	3e-05	6.48e-05	1.99e-05	0	0	0	0	0	0	3.09e-05	0	4.1e-05	0	0	0	0	0	0	0	0	2.73e-05	6.73e-05	1.73e-05	0	1.55e-05	0	2.77e-05	0	0	1.74e-05	0	0	7.48e-05	Eukaryota	Alveolata	Dinoflagellata	Dinophyceae	Dinophyceae_unclassified	Dinophyceae_unclassified	Dinophyceae_unclassified
OTU_3174	0	0	4.02e-05	5.21e-05	3e-05	4.05e-05	3.97e-05	0	0	0	0	0.00016138	0.000128174	0.000324024	0	0.000348532	0.00017463	0.000283221	0	0	0	0	0	0	0.000232371	0.000336253	0.000814742	0.000596949	0.000279191	0.000628931	0.000193981	0.00153552	0.000199018	0.000802386	0.000209559	0.000477107	0.000187003	Eukaryota	Alveolata	Dinoflagellata	Dinophyceae	Gymnodiniales	Gymnodiniales_unclassified	Gymnodiniales_unclassified
OTU_21574	0	0	4.02e-05	5.21e-05	0	2.43e-05	0	0	0	0	0	0.000530247	0.000370281	0.000277735	0.000158562	0.000246023	1.75e-05	0.00026552	0	0	0	0	4.83e-05	0	6.83e-05	0.000151314	0.00010401	1.57e-05	0.000108574	0.000104822	5.54e-05	5.42e-05	2.21e-05	0.000139545	1.61e-05	0.000119277	3.74e-05	Eukaryota	Alveolata	Dinoflagellata	Dinophyceae	Gymnodiniales	Gymnodiniaceae	Gyrodinium_unclassified
OTU_5237	0	0	4.02e-05	5.21e-05	0	1.62e-05	0	5.04e-05	0	0	0	0	0	0	0	0	0	3.54e-05	0	0	0	0	0	0	1.37e-05	0	8.67e-05	3.14e-05	1.55e-05	0	2.77e-05	0	2.21e-05	0	4.84e-05	3.41e-05	5.61e-05	Eukaryota	Alveolata	Dinoflagellata	Dinophyceae	Dinophyceae_unclassified	Dinophyceae_unclassified	Dinophyceae_unclassified
OTU_4987	0	0	4.02e-05	5.21e-05	0	0	0	0	0	0	0	2.31e-05	2.85e-05	3.09e-05	0	8.2e-05	0	3.54e-05	0	0	0	0	0	0	0	0	1.73e-05	0	0.00024817	0.000146751	2.77e-05	0.000198714	6.63e-05	3.49e-05	8.06e-05	0.000204475	7.48e-05	Eukaryota	Alveolata	Dinoflagellata	Dinophyceae	Dinophyceae_unclassified	Dinophyceae_unclassified	Dinophyceae_unclassified
OTU_3335	0	0	4.02e-05	5.21e-05	0.000239787	0.000129587	0.000754597	0.000579258	0	0	0.000111405	0.000138325	0.000484213	0.000277735	0.000863284	0.000922585	0.000925538	0.000106208	0	0	0	0	0	0	4.1e-05	1.68e-05	5.2e-05	6.28e-05	4.65e-05	0.000125786	8.31e-05	0.000126454	0.000110566	0.000226761	8.06e-05	6.82e-05	0.000187003	Eukaryota	Hacrobia	Haptophyta	Prymnesiophyceae	Prymnesiales	Chrysochromulinaceae	Chrysochromulina_unclassified
OTU_3278	0	0	4.02e-05	5.21e-05	0.000119893	4.05e-05	0.00190635	0.00146074	0	0	0.000974795	0.00198266	0.00183716	0.00262305	0.00636011	0.00401837	0.00920299	0.000566442	0	4.34e-05	0	0	0	1.43e-05	2.73e-05	3.36e-05	0.000121344	4.71e-05	0.000170617	0.000188679	0.000443385	0.000252908	0.000574941	0.000401193	0.000274039	0.000545266	0.000336606	Eukaryota	Hacrobia	Haptophyta	Prymnesiophyceae	Prymnesiophyceae_Clade_F	Prymnesiophyceae_Clade_F_X	Prymnesiophyceae_Clade_F_XX_sp.
OTU_1255	0	0	4.02e-05	5.21e-05	0.000209813	0.000218678	7.94e-05	0	0	0	0	0	0.000441489	0.000246875	0.000493305	0.000143513	0.000279408	0.000123909	0	0	0	0	0	0	0	0	0	0	0	0	0	0	0	0	0	0	0	Eukaryota	Stramenopiles	Ochrophyta	Bacillariophyta	Bacillariophyta_X	Polar-centric-Mediophyceae	Polar-centric-Mediophyceae_unclassified
OTU_1154	0	0	4.02e-05	5.21e-05	5.99e-05	0.000113389	3.97e-05	0	0	0	0.000194959	0.0011066	0.00176595	0.00286993	0.00220226	0.00477694	0.00508173	0.000654948	0	0	1.83e-05	0	0	0	0	5.04e-05	0	0	0.000170617	4.19e-05	2.77e-05	1.81e-05	4.42e-05	3.49e-05	9.67e-05	3.41e-05	3.74e-05	Eukaryota	Stramenopiles	Ochrophyta	Bacillariophyta	Bacillariophyta_X	Polar-centric-Mediophyceae	Chaetoceros_peruvianus
OTU_683	0.0026069	0.0025181	4.02e-05	5.21e-05	0	0	0	0	0.000265664	0.000412601	8.36e-05	2.31e-05	0	0	0	0	0	0	0	0.000361936	1.83e-05	0	0	0	0	0	0	0	0	0	0	0	0	0	0	0	0	Eukaryota	Stramenopiles	Ochrophyta	Chrysophyceae	Chrysophyceae_X	Chrysophyceae_XX	Chrysophyceae_XXX_sp.
OTU_591	0.00152818	0.00368722	4.02e-05	5.21e-05	0	0	0	0	0	0	0	0	1.42e-05	0	0	0	0	0	0	0	0	0	0	0	0	0	0	0	0	0	0	0	0	0	0	0	0	Eukaryota	Stramenopiles	Ochrophyta	Chrysophyceae	Chrysophyceae_X	Chrysophyceae_XX	Chrysophyceae_XXX_sp.
OTU_1684	0.000449465	0.000337245	4.02e-05	5.21e-05	0	0	0	0	2.8e-05	0.000218436	0	0	0	0	0	0	0	0	0	0.000347458	0	0	0	0	0	0	0	0	0	0	0	0	0	0	0	0	0	Eukaryota	Stramenopiles	Ochrophyta	Chrysophyceae	Chrysophyceae_X	Chrysophyceae_Clade-G	Chrysophyceae_Clade-G_X_sp.
OTU_7246	0	0	2.01e-05	5.21e-05	0	0	0	0	0	0	0	2.31e-05	5.7e-05	3.09e-05	5.29e-05	0	3.49e-05	3.54e-05	0	0	0	0	0	0	0	3.36e-05	5.2e-05	0.000204219	7.76e-05	6.29e-05	2.77e-05	1.81e-05	0	0	1.61e-05	1.7e-05	0	Eukaryota	Rhizaria	Cercozoa	Filosa-Thecofilosea	Cryomonadida	Cryomonadida_unclassified	Cryomonadida_unclassified
OTU_540	0.00146825	0.00123657	2.01e-05	5.21e-05	0	0	0	0	0	0	0	0	0	0	0	0	0	0	0	0.000115819	0	0	0	0	0	0	0	0	0	0	0	0	0	0	0	0	0	Eukaryota	Rhizaria	Cercozoa	Cercozoa_unclassified	Cercozoa_unclassified	Cercozoa_unclassified	Cercozoa_unclassified
OTU_1989	0	0	2.01e-05	5.21e-05	8.99e-05	0	0	0	0	0	0	2.31e-05	0.00018514	0.000123438	7.05e-05	0	0	0	0	0	0	0	0	0	1.37e-05	0	0	3.14e-05	0	0	0	0	0	0	0	0	0	Eukaryota	Archaeplastida	Chlorophyta	Mamiellophyceae	Mamiellales	Mamiellaceae	Mamiella_gilva
OTU_1836	0	0	2.01e-05	5.21e-05	0.000209813	4.86e-05	9.93e-05	0.000125926	0	0	0.00022281	0.00016138	4.27e-05	1.54e-05	0	6.15e-05	0	1.77e-05	0	0	0	0	6.43e-05	0	0	3.36e-05	6.93e-05	3.14e-05	1.55e-05	0	0	1.81e-05	0	6.98e-05	0	0	0	Eukaryota	Alveolata	Ciliophora	Litostomatea	Haptoria_4	Didiniidae	Didiniidae_X_sp.
OTU_3490	0	0	2.01e-05	5.21e-05	5.99e-05	4.05e-05	5.96e-05	0.000201481	0	0	0	2.31e-05	0	1.54e-05	0	0	0	0	0	0	0	0	0	0	0	0	1.73e-05	0	0	0	0	7.23e-05	0	0.000244205	1.61e-05	6.82e-05	0	Eukaryota	Alveolata	Ciliophora	Spirotrichea	Strombidiida	Strombidiidae_M	Strombidiidae_M_X_sp.
OTU_1017	0.000329608	0.000134898	2.01e-05	5.21e-05	0	1.62e-05	0	0	0	7.28e-05	2.79e-05	0	0	0	0	0	0	0	0	1.45e-05	0.000439295	1.96e-05	0	0	0	0	0	0	0	0	0	0	0	0	0	0	0	Eukaryota	Alveolata	Ciliophora	CONTH_4	CONTH_4_X	CONTH_4_XX	CONTH_4_XXX_sp.
OTU_637	0.000269679	0.000134898	2.01e-05	5.21e-05	0	0	0	0	0	0	0	0	0	0	0	0	0	0	0	1.45e-05	3.66e-05	0	0	0	0	0	0	0	0	0	0	0	0	0	0	0	0	Eukaryota	Alveolata	Ciliophora	CONTH_4	CONTH_4_X	CONTH_4_XX	CONTH_4_XXX_sp.
OTU_1134	0.000119857	0.00022483	2.01e-05	5.21e-05	0	0	0	0	0.000237699	0.000485413	0.000278513	6.92e-05	0	0	0	0	0	0	0.000195612	0.00309817	0.000402687	0	0	0	0	0	0	0	0	0	0	0	0	0	0	0	0	Eukaryota	Hacrobia	Cryptophyta	Cryptophyceae	Cryptophyceae_X	Cryptomonadales	Plagioselmis_nannoplanctica
OTU_5018	0	0	2.01e-05	5.21e-05	0.000479573	0.000672234	0.000119147	0.00010074	0	0	0	2.31e-05	4.27e-05	3.09e-05	0	0.000184517	5.24e-05	1.77e-05	0	0	0	0	0	0	5.47e-05	0.000151314	6.93e-05	0	9.31e-05	0	0.000138558	7.23e-05	2.21e-05	0.000261648	6.45e-05	0.000272633	0.000224404	Eukaryota	Alveolata	Dinoflagellata	Dinophyceae	Dinophyceae_unclassified	Dinophyceae_unclassified	Dinophyceae_unclassified
OTU_21313	0	0	2.01e-05	5.21e-05	0.00017984	4.05e-05	0	0	0	0	0	2.31e-05	0	9.26e-05	0	0.000246023	5.24e-05	7.08e-05	0	0	0	0	0	0	6.83e-05	0	0.000138679	0.000345602	0	6.29e-05	2.77e-05	0.000578076	2.21e-05	0.000244205	3.22e-05	0.000238554	0	Eukaryota	Alveolata	Dinoflagellata	Dinophyceae	Dinophyceae_unclassified	Dinophyceae_unclassified	Dinophyceae_unclassified
OTU_2274	0	0	2.01e-05	5.21e-05	0.000119893	5.67e-05	0.000218436	7.56e-05	0	0	0	2.31e-05	2.85e-05	4.63e-05	0	0.000266525	0.000331797	0.000159312	0	0	0	0	0	0	0.000150357	0.000117689	0.000260024	7.85e-05	7.76e-05	0.000146751	0.000138558	0.000289038	6.63e-05	0.000261648	8.06e-05	0.00039191	3.74e-05	Eukaryota	Alveolata	Dinoflagellata	Dinophyceae	Gymnodiniales	Gymnodiniaceae	Gyrodinium_unclassified
OTU_5065	0	0	2.01e-05	5.21e-05	5.99e-05	3.24e-05	0	0	0	0	0	0	0	3.09e-05	0.000123326	2.05e-05	0	3.54e-05	0	0	0	0	0	0	0	3.36e-05	0.000173349	0	6.2e-05	2.1e-05	0.000221693	3.61e-05	0.000530715	0	0.000370758	6.82e-05	0.000261805	Eukaryota	Alveolata	Dinoflagellata	Dinophyceae	Dinophyceae_unclassified	Dinophyceae_unclassified	Dinophyceae_unclassified
OTU_3833	0	2.25e-05	2.01e-05	5.21e-05	0	6.48e-05	5.96e-05	0.00010074	0	0	0	0.000414976	0	1.54e-05	0	4.1e-05	0	3.54e-05	0	0	0	0	1.61e-05	0	1.37e-05	0.000117689	1.73e-05	4.71e-05	0	2.1e-05	0	1.81e-05	0	0.000122102	1.61e-05	3.41e-05	0	Eukaryota	Alveolata	Dinoflagellata	Dinophyceae	Dinophyceae_unclassified	Dinophyceae_unclassified	Dinophyceae_unclassified
OTU_22245	0	0	2.01e-05	5.21e-05	0	5.67e-05	0	0	0	0	0	0	2.85e-05	1.54e-05	0	0	0	0	0	0	0	0	0	0	0	6.73e-05	1.73e-05	3.14e-05	1.55e-05	2.1e-05	0.000166269	1.81e-05	0	5.23e-05	0	6.82e-05	0	Eukaryota	Alveolata	Dinoflagellata	Dinophyceae	Peridiniales	Heterocapsaceae	Heterocapsa_unclassified
OTU_2374	0	0	2.01e-05	5.21e-05	0	4.86e-05	0.000337583	0.000352592	0	0	0	0.000184434	0	3.09e-05	0	2.05e-05	1.75e-05	1.77e-05	0	0	0	0	8.04e-05	2.86e-05	0	1.68e-05	1.73e-05	0	0	0	2.77e-05	5.42e-05	0	8.72e-05	0	3.41e-05	0	Eukaryota	Alveolata	Dinoflagellata	Dinophyceae	Dinophyceae_unclassified	Dinophyceae_unclassified	Dinophyceae_unclassified
OTU_1831	0.00203757	0.000899321	2.01e-05	5.21e-05	0	0	0	0	0.000377522	0.00211155	0	0	0	0	1.76e-05	0	0	0	0	1.45e-05	0	0	0	0	0	0	0	0	0	0	0	0	0	0	0	0	0	Eukaryota	Alveolata	Dinoflagellata	Dinophyceae	Dinophyceae_unclassified	Dinophyceae_unclassified	Dinophyceae_unclassified
OTU_2734	0	0	2.01e-05	5.21e-05	3e-05	1.62e-05	5.96e-05	2.52e-05	0	0	0	6.92e-05	0.000341798	0.000185157	0	0.000123011	0	0.000247818	0	0	0	0	0	0	1.37e-05	0.000151314	0.000173349	9.43e-05	0.000279191	0.000209644	0.000360251	0.000289038	0.000486489	0.000139545	0.000419118	0.000255593	0.000467508	Eukaryota	Eukaryota_unclassified	Eukaryota_unclassified	Eukaryota_unclassified	Eukaryota_unclassified	Eukaryota_unclassified	Eukaryota_unclassified
OTU_6615	0	0	2.01e-05	5.21e-05	8.99e-05	4.86e-05	0.000139005	0.000125926	0	0	0	2.31e-05	0	1.54e-05	0	4.1e-05	3.49e-05	0.000159312	0	0	0	0	0	0	0	0	0	0	0	0	0	0	0	0	0	0	0	Eukaryota	Stramenopiles	Ochrophyta	Bacillariophyta	Bacillariophyta_X	Polar-centric-Mediophyceae	Chaetoceros_neogracile
OTU_16336	0.000329608	0.00022483	2.01e-05	5.21e-05	0	0	0	0	0.000111858	0.000291248	8.36e-05	0	0	0	0	0	0	0	0	0.000115819	0	0	0	0	0	0	0	0	0	0	0	0	0	0	0	0	0	Eukaryota	Stramenopiles	Ochrophyta	Chrysophyceae	Chrysophyceae_X	Chrysophyceae_Clade-C	Chrysophyceae_Clade-C_unclassified
OTU_862	0.00191772	0.00161878	2.01e-05	5.21e-05	0	0	0	0	0.000643186	0.00468424	0	0	0	0	0	0	0	0	3.26e-05	0.000159252	0	0	0	0	0	0	0	0	0	0	0	0	0	0	0	0	0	Eukaryota	Stramenopiles	Ochrophyta	Chrysophyceae	Chrysophyceae_X	Chrysophyceae_XX	Chrysophyceae_XXX_sp.
OTU_2683	0.00020975	0.000359728	2.01e-05	5.21e-05	0	0	0	0	0	0	0	0	0	0	0	0	0	0	0	0	0	0	0	0	0	0	0	0	0	0	0	1.81e-05	0	0	0	0	0	Eukaryota	Stramenopiles	Ochrophyta	Chrysophyceae	Chrysophyceae_X	Chrysophyceae_Clade-C	Chrysophyceae_Clade-C_X_sp.
OTU_605	0	2.25e-05	2.01e-05	5.21e-05	0.000419627	0.000194381	0.00133047	0.00128444	0	0	0	2.31e-05	0.000398764	0.000648048	0.000229035	0.00032803	0.000296871	0.000389429	0	0	0	0	0	0	0	0	5.2e-05	0	0	0	0	1.81e-05	6.63e-05	6.98e-05	0	3.41e-05	7.48e-05	Eukaryota	Stramenopiles	Stramenopiles_X	MAST	MAST-1	MAST-1A	MAST-1A_X_sp.
OTU_751	0	0	2.01e-05	5.21e-05	0	0	0	0	0.00018177	0.000291248	0.000362067	4.61e-05	0	0	0	0	0	0	0	0	0	3.91e-05	0	0	0	0	0	0	0	0	0	0	0	0	0	0	0	Eukaryota	Stramenopiles	Stramenopiles_X	Oomycota	Oomycota_X	Saprolegniales	Saprolegnia_parasitica
OTU_1065	0.000149822	0.000157381	2.01e-05	5.21e-05	0	0	0	0	1.4e-05	0	2.79e-05	0	0	0	0	0	0	0	0.00016301	0	0.000622334	0.000136957	0	0	0	0	0	0	1.55e-05	0	0	0	0	0	0	0	0	Eukaryota	Stramenopiles	Stramenopiles_X	Bicoecea	Bicoecales	Bicoecaceae	Bicoecaceae_X_sp.
OTU_6199	0	0	2.01e-05	5.21e-05	0	1.62e-05	0	0	0	0	0	0	0.000227865	0.000123438	0.000211416	0	0.000139704	0.000690351	0	0	0	0	0	0	2.73e-05	0	0.000208019	4.71e-05	4.65e-05	4.19e-05	0.000332539	0.000126454	0.000199018	3.49e-05	0.000161199	1.7e-05	1.87e-05	Eukaryota	Hacrobia	Telonemia	Telonemia_X	Telonemia_XX	Telonemia-Group-2	Telonema_antarcticum
OTU_1889	0.000299643	0.000607042	0	5.21e-05	0	0	0	0	0	0	0	0	0	0	0	0	0	0	0.000586835	4.34e-05	0.000274559	0.000156522	0	0	0	0	0	0	0	0	0	0	0	0	0	0	0	Eukaryota	Alveolata	Alveolata_unclassified	Alveolata_unclassified	Alveolata_unclassified	Alveolata_unclassified	Alveolata_unclassified
OTU_1762	0.000119857	0.000134898	0	5.21e-05	0	0	0	0	6.99e-05	0.000266977	0.000640579	2.31e-05	0	0	0	0	8.73e-05	0	6.52e-05	0.000101342	7.32e-05	0.000156522	0	0.000100229	0	0	6.93e-05	0	0	0	0	0	0	0	0	0	0	Eukaryota	Alveolata	Apicomplexa	Apicomplexa_X	Colpodellidae	Colpodellidae_X	Colpodellidae_X_unclassified
OTU_168	0	0	0	5.21e-05	0	0	0	0	0	0	0.000250661	0.000553301	7.12e-05	0	3.52e-05	4.1e-05	0.00117002	0.00014161	0	0	0	0	0	0	0	1.68e-05	1.73e-05	0	3.1e-05	0.000146751	8.31e-05	0.000216779	0.000132679	0.000122102	8.06e-05	0.000102237	0.000112202	Eukaryota	Rhizaria	Cercozoa	Filosa-Imbricatea	Filosa-Imbricatea_X	Novel-clade-2	Novel-clade-2_X_sp.
OTU_1161	0.000779073	0.00317011	0	5.21e-05	0	0	0	0	0.000405487	0.00803359	0.00459546	0.000714681	4.27e-05	0	0	0	1.75e-05	0	0	1.45e-05	7.32e-05	5.87e-05	0	0	0	0	0	0	0	0	0	0	0	0	0	0	0	Eukaryota	Rhizaria	Cercozoa	Novel-clade-10-12	Novel-clade-10	Novel-clade-10_X	Novel-clade-10_XX_sp.
OTU_1641	0.00101879	0.00143891	0	5.21e-05	0	0	0	0	0	4.85e-05	0	0	0	0	0	0	0	0	0	0	0	0	0	0	0	0	0	0	0	0	0	0	0	0	0	0	0	Eukaryota	Rhizaria	Cercozoa	Novel-clade-10-12	Novel-clade-10	Novel-clade-10_X	Novel-clade-10_XX_sp.
OTU_1012	0.00140832	0.00121408	0	5.21e-05	0	0	0	0	0	0	0	0	0	0	0	0	0	0	0	0	0	0	0	0	0	0	0	0	0	0	0	0	0	0	0	0	0	Eukaryota	Rhizaria	Cercozoa	Filosa-Imbricatea	Spongomonadida	Spongomonadidae	Spongomonas_unclassified
OTU_6656	0.000179786	0.000472144	0	5.21e-05	0	0	0	0	1.4e-05	9.71e-05	0.000194959	9.22e-05	0	0	0	0	0	0	0	2.9e-05	0	0	0	0	0	0	0	0	0	0	0	0	0	0	0	0	0	Eukaryota	Archaeplastida	Chlorophyta	Chlorophyceae	Chlamydomonadales	Chlamydomonadales_X	Chlamydomonadales_X_unclassified
OTU_2037	0	0	0	5.21e-05	3e-05	8.1e-06	7.94e-05	5.04e-05	0	0	5.57e-05	4.61e-05	1.42e-05	1.54e-05	0	8.2e-05	0.00115256	0.00793019	0	0	1.83e-05	0	9.65e-05	0	2.73e-05	0.000117689	0.000572053	0.00018851	0.00200087	0.00048218	0.000748213	0.000560012	0.000840299	0.00150011	0.00122511	0.00379982	0.00310425	Eukaryota	Opisthokonta	Choanoflagellida	Choanoflagellatea	Acanthoecida	Stephanoecidae_Group_H	Stephanoecidae_Group_H_X_sp.
OTU_753	0.000329608	0.000382211	0	5.21e-05	0	0	0	0	0	2.43e-05	5.57e-05	0	0	0	0	0	0	0	0	0	0.000109824	0.000136957	0	0	0	0	0	0	0	0	0	0	0	0	0	0	0	Eukaryota	Opisthokonta	Choanoflagellida	Choanoflagellatea	Choanoflagellatea_X	Choanoflagellatea_X_Group_L	Choanoflagellatea_X_Group_L_X_sp.
OTU_2997	0	0.000269796	0	5.21e-05	0	0	0	0	0	0	0	0	0	0	0	0	0	0	0	0	1.83e-05	3.91e-05	1.61e-05	0	0	0	0	0	0	0	0	0	0	0	0	0	0	Eukaryota	Opisthokonta	Choanoflagellida	Choanoflagellatea	Choanoflagellatea_X	Choanoflagellatea_X_Group_L	Choanoflagellatea_X_Group_L_X_sp.
OTU_2297	0.000389536	0.000584559	0	5.21e-05	0	0	0	0	0	0	0	0	0	0	0	0	0	0	0	0	0	0	0	0	0	0	0	0	0	0	0	0	0	0	0	0	0	Eukaryota	Opisthokonta	Choanoflagellida	Choanoflagellatea	Craspedida	Monosigidae_Group_A	Monosiga_ovata
OTU_1734	0	0.000629525	0	5.21e-05	0	0	0	0	0	0	0	0	0	0	0	0	0	0	0	0	0	0	0	0	0	0	0	0	0	0	0	0	0	0	0	0	0	Eukaryota	Opisthokonta	Choanoflagellida	Choanoflagellida_X	Choanoflagellida_XX	Clade-2	Sphaeroeca_unclassified
OTU_13387	0	0	0	5.21e-05	5.99e-05	8.1e-06	0	0	0	0	0	0	1.42e-05	4.63e-05	0	0	0	0	0	0	0	0	0	0	0	0	0	1.57e-05	1.55e-05	0.000104822	2.77e-05	0.000289038	2.21e-05	3.49e-05	1.61e-05	0	0	Eukaryota	Alveolata	Ciliophora	Spirotrichea	Strombidiida_H	Strombidiida_H_X	Strombidiida_H_XX_sp.
OTU_13921	0	0	0	5.21e-05	5.99e-05	0	0	0	0	0	0	0	0	1.54e-05	0	0	0	0	0	0	0	0	0	0	0	1.68e-05	1.73e-05	0	0	4.19e-05	2.77e-05	0.000198714	0	6.98e-05	0	0	0	Eukaryota	Alveolata	Ciliophora	Spirotrichea	Spirotrichea_unclassified	Spirotrichea_unclassified	Spirotrichea_unclassified
OTU_4897	0	0	0	5.21e-05	3e-05	0	0	0.000125926	0	0	0	0	0	0	0	0	0	0	0	0	0	0	0	0	0	0	0	0	0	2.1e-05	0	7.23e-05	0	6.98e-05	0	0	0	Eukaryota	Alveolata	Ciliophora	Spirotrichea	Spirotrichea_unclassified	Spirotrichea_unclassified	Spirotrichea_unclassified
OTU_6953	0	0	0	5.21e-05	0	3.24e-05	0	0	0	0	0	0	4.27e-05	7.71e-05	1.76e-05	6.15e-05	0	0	0	0	0	0	0	0	0	0	0	0	0	4.19e-05	0	0	0	5.23e-05	0	0	0	Eukaryota	Alveolata	Ciliophora	Spirotrichea	Strombidiida_G	Strombidiida_G_X	Strombidium_G_X_unclassified
OTU_2078	0.000599287	0.00130401	0	5.21e-05	0	0	0	0	0	0	2.79e-05	0	0	0	0	0	0	0	0.000293418	0	0.00148262	0.000195653	0	0	0	0	1.73e-05	0	1.55e-05	0	0	0	0	0	0	0	0	Eukaryota	Alveolata	Ciliophora	Spirotrichea	Choreotrichida	Strobilidiidae_G	Strobilidiidae_G_X_sp.
OTU_1556	0.00194768	0.00375466	0	5.21e-05	0	0	0	0	0.00185965	0.00560652	0	0	0	0	0	0	0	0	0	0.000738349	0	0	0	0	0	0	0	0	0	0	0	0	0	0	0	0	0	Eukaryota	Alveolata	Ciliophora	Spirotrichea	Choreotrichida	Strobilidiidae_H	Strobilidiidae_H_X_sp.
OTU_4537	0.000389536	0.000494627	0	5.21e-05	0	0	0	0	0.000950796	0.00196592	0	0	0	0	0	0	0	0	3.26e-05	0.00108581	0.000366079	0	0	0	0	0	0	0	0	0	0	0	0	0	0	0	0	Eukaryota	Alveolata	Ciliophora	CONTH_4	CONTH_4_X	CONTH_4_XX	CONTH_4_XXX_sp.
OTU_3685	0.000599287	0.000202347	0	5.21e-05	0	0	0	0	0	0	0	0	0	0	0	0	0	0	0	0	0	0	0	0	0	0	0	0	0	0	0	0	0	0	0	0	0	Eukaryota	Alveolata	Ciliophora	Colpodea	Colpodea_X	Bursariomorphida	Bursariomorphida_unclassified
OTU_1901	0	0	0	5.21e-05	0.00071936	0.0010529	0	0	0	0	0	0	0	3.09e-05	0	8.2e-05	3.49e-05	0	0	0	0	0	0	0	0	0	0	0	0	0	0	0	0	0	0	0	0	Eukaryota	Alveolata	Dinoflagellata	Dinophyceae	Gymnodiniales	Gymnodiniaceae	Margalefidinium_fulvescens
OTU_21638	0	0	0	5.21e-05	0.000119893	0.00010529	0.000139005	7.56e-05	0	0	0	0	2.85e-05	0	0	4.1e-05	6.99e-05	0	0	0	0	0	0	0	0	1.68e-05	0	0	1.55e-05	0	0	0	2.21e-05	1.74e-05	0	0.000119277	3.74e-05	Eukaryota	Alveolata	Dinoflagellata	Dinophyceae	Torodiniales	Torodiniaceae	Torodinium_unclassified
OTU_420	0	0	0	5.21e-05	8.99e-05	0.000161984	0.000814171	0.000604443	0	0	0	0	0	4.63e-05	0	0.000348532	3.49e-05	3.54e-05	0	0	0	0	0	0	0	0	0	0	0	0	0	1.81e-05	2.21e-05	6.98e-05	9.67e-05	6.82e-05	3.74e-05	Eukaryota	Alveolata	Dinoflagellata	Dinophyceae	Dinophyceae_unclassified	Dinophyceae_unclassified	Dinophyceae_unclassified
OTU_6452	0	0	0	5.21e-05	3e-05	8.91e-05	7.94e-05	7.56e-05	0	0	0	0	1.42e-05	0	3.52e-05	2.05e-05	3.49e-05	0	0	0	0	0	0	0	0	0	0	0	0	4.19e-05	0	0	2.21e-05	1.74e-05	1.61e-05	1.7e-05	0	Eukaryota	Alveolata	Dinoflagellata	Dinophyceae	Dinophyceae_unclassified	Dinophyceae_unclassified	Dinophyceae_unclassified
OTU_6780	0	0	0	5.21e-05	3e-05	3.24e-05	0.000218436	0.000201481	0	0	0	0	0	0	0	0	0	1.77e-05	0	0	0	0	0	0	0	0	1.73e-05	0	0	0	0	0	0	1.74e-05	0	0	1.87e-05	Eukaryota	Alveolata	Dinoflagellata	Dinophyceae	Dinophyceae_unclassified	Dinophyceae_unclassified	Dinophyceae_unclassified
OTU_3307	0	0	0	5.21e-05	3e-05	1.62e-05	0.000119147	0.00010074	0	0	0	0	2.85e-05	0	0	0	0	0	0	0	0	0	0	0	0	0	0	0	1.55e-05	0	0	1.81e-05	0	0	1.61e-05	1.7e-05	0	Eukaryota	Alveolata	Dinoflagellata	Dinophyceae	Gymnodiniales	Gymnodiniaceae	Gyrodinium_helveticum
OTU_2929	0	0	0	5.21e-05	0	0.000234877	0	0	0	0	0	0	4.27e-05	0	0	2.05e-05	0	0	0	0	0	0	0	0	0	3.36e-05	0	3.14e-05	0	0	0	0	0	0	0	0	0	Eukaryota	Alveolata	Dinoflagellata	Dinophyceae	Gonyaulacales	Goniodomataceae	Alexandrium_unclassified
OTU_460	0	0	0	5.21e-05	0	0	0	0	0	0	0.000194959	0.00108355	0	0	0.000440451	8.2e-05	0.000366723	0.00040713	0	0	0	0	1.61e-05	1.43e-05	0.000109351	1.68e-05	0.000485378	0.000157092	0.00179923	0.000524109	0.000277116	0.000867115	0.000243244	8.72e-05	1.61e-05	0.0013802	5.61e-05	Eukaryota	Alveolata	Dinoflagellata	Dinophyceae	Peridiniales	Amphidiniopsidaceae	Islandinium_tricingulatum
OTU_1418	0.000599287	0.000854355	0	5.21e-05	0	0	0	0	0	0.000145624	0	0	0	0	1.76e-05	0	0	0	0	0	0	0	0	0	0	0	0	0	0	0	0	0	0	0	0	0	0	Eukaryota	Alveolata	Dinoflagellata	Dinophyceae	Dinophyceae_X	Dinophyceae_XX	Dinophyceae_XXX_sp.
OTU_371	0.000179786	0	0	5.21e-05	0	0	0	0	0	0.000169895	0	0	0	0	0	0	0	0	0.0016627	0	0.0101404	0.00358044	0.000450356	0.000329324	0.000109351	3.36e-05	1.73e-05	1.57e-05	0	0	0	0	0	0	0	0	0	Eukaryota	Alveolata	Dinoflagellata	Dinophyceae	Prorocentrales	Prorocentraceae	Prorocentrum_sp.
OTU_1265	5.99e-05	8.99e-05	0	5.21e-05	0	0	0	0	0	0	0.000362067	0	0	0	0	0	0	0	0	0.00215714	0	0	1.61e-05	0	0	0	0	0	0	0	0	0	0	0	0	0	0	Eukaryota	Eukaryota_unclassified	Eukaryota_unclassified	Eukaryota_unclassified	Eukaryota_unclassified	Eukaryota_unclassified	Eukaryota_unclassified
OTU_3811	0.000449465	6.74e-05	0	5.21e-05	0	0	0	0	0	4.85e-05	0	0	0	1.54e-05	0	0	0	0	0	0	0	3.91e-05	0	0	0	0	0	0	0	0	0	0	0	0	0	0	0	Eukaryota	Eukaryota_unclassified	Eukaryota_unclassified	Eukaryota_unclassified	Eukaryota_unclassified	Eukaryota_unclassified	Eukaryota_unclassified
OTU_14001	0.000179786	0.000539593	0	5.21e-05	0	0	0	0	0	0	0	0	1.42e-05	3.09e-05	0	0	0	0	0	0	0	0	0	0	0	0	0	0	0	0	0	0	0	0	0	0	0	Eukaryota	Eukaryota_unclassified	Eukaryota_unclassified	Eukaryota_unclassified	Eukaryota_unclassified	Eukaryota_unclassified	Eukaryota_unclassified
OTU_6413	0	0.000359728	0	5.21e-05	0	0	0	0	0	0	0	0	0	0	0	0	0	0	0	0	0	0	0	0	0	0	0	0	0	0	0	0	0	0	0	0	0	Eukaryota	Eukaryota_unclassified	Eukaryota_unclassified	Eukaryota_unclassified	Eukaryota_unclassified	Eukaryota_unclassified	Eukaryota_unclassified
OTU_1804	0.000569323	4.5e-05	0	5.21e-05	0	0	0	0	0	0	0	0	0	0	0	0	0	0	0	0	0	0	0	0	0	0	0	0	0	0	0	0	0	0	0	0	0	Eukaryota	Eukaryota_unclassified	Eukaryota_unclassified	Eukaryota_unclassified	Eukaryota_unclassified	Eukaryota_unclassified	Eukaryota_unclassified
OTU_1592	0.0013484	0.00101174	0	5.21e-05	0	0	0	0	0	0	0	0	0	0	0	0	0	0	0	0	0	0	0	0	0	0	0	0	0	0	0	0	0	0	0	0	0	Eukaryota	Eukaryota_unclassified	Eukaryota_unclassified	Eukaryota_unclassified	Eukaryota_unclassified	Eukaryota_unclassified	Eukaryota_unclassified
[truncated: 4,842 more rows]
