# Supplementary material for: Protist communities along freshwater–marine transition zones in Hudson Bay (Canada)
Source: Oxford University Press journal article supplement (doi:10.1525/elementa.2021.00111), 2021-01-01
Supplement: supplementary_table_s4.rna_otus_table_relative4230.xlsx [file supplementary_table_s4.rna_otus_table_relative4230.xlsx]

## Sheet: Supplementary_data2.Hudson_RNA_
OTU_ID	GW-A (rep1)	GW-B (rep1)	GW-B (rep2)	GW-B (rep3)	GW-C (surface)	GW-C (SCM)	CH-A	CH-B (surface)	CH-B (bottom)	CH-C (surface)	CH-C (bottom)	CH-D (surface)	CH-D (bottom)	CH-E (surface)	CH-E (bottom)	NE-A	HA-A	NE-B	NE-C	NE-D (surface)	NE-D (bottom)	NE-E (surface)	NE-E (bottom)	NE-45 (surface - rep1)	NE-45 (surface-rep2)	NE-45 (bottom)	NE-WE1 (surface)	NE-WE1 (bottom)	NE-WE2 (surface)	NE-WE2 (bottom)	NE-WE3 (surface)	NE-WE3 (bottom)	NE-46 (surface)	NE-46 (SCM)	Kingdom	Phylum	Class	Order	Family	Genus	Species	Sub-Species
OTU_886	0	0	0	0	0	0	0.000474678	0.000147939	0	0	0	0	0	0	0	0	3.06e-05	0	0	0	0	0	0	0	0	0	0	0	0	0	0	0	0	0	Eukaryota	Eukaryota_unclassified	Eukaryota_unclassified	Eukaryota_unclassified	Eukaryota_unclassified	Eukaryota_unclassified	Eukaryota_unclassified	Eukaryota_unclassified
OTU_889	0	0	0	0	0	0	0.00153357	0.000125179	0	0	0	0	0	0	0	0	0	0	0	0	0	0	0	0	0	0	0	0	0	0	0	0	0	0	Eukaryota	Eukaryota_unclassified	Eukaryota_unclassified	Eukaryota_unclassified	Eukaryota_unclassified	Eukaryota_unclassified	Eukaryota_unclassified	Eukaryota_unclassified
OTU_899	0	0.000790847	0.00134677	0.00272777	0.000108657	0.000206977	7.3e-05	0.00241254	0	0.0124958	0.0286367	0	0	0.00444644	0.00163549	0.0048466	0	1.78e-05	0.00296068	0.039223	0.0129363	0.081138	0.0612512	0.138244	0.171019	0.0142913	0.0913957	0.00640013	0.110206	0	0	0.0174154	0.0182334	0.0673548	Eukaryota	Eukaryota_unclassified	Eukaryota_unclassified	Eukaryota_unclassified	Eukaryota_unclassified	Eukaryota_unclassified	Eukaryota_unclassified	Eukaryota_unclassified
OTU_151	0	0	0	0	0	0	0.00059639	7.97e-05	0	0	0	0	0	0	0	0	0	0	0	0	0	0	0	0	0	0	0	0	0	0	0	0	0	0	Eukaryota	Eukaryota_unclassified	Eukaryota_unclassified	Eukaryota_unclassified	Eukaryota_unclassified	Eukaryota_unclassified	Eukaryota_unclassified	Eukaryota_unclassified
OTU_108	0.000903361	0.00139716	0.00279876	0.00183904	0.00910005	0.000254741	0	0	0	0.00197674	0	0	0.00454006	0	0	0	0	0	0	0	0	3.07e-05	0	0	0	0	0	0	0	0	0	0	0	0	Eukaryota	Eukaryota_unclassified	Eukaryota_unclassified	Eukaryota_unclassified	Eukaryota_unclassified	Eukaryota_unclassified	Eukaryota_unclassified	Eukaryota_unclassified
OTU_15053	0.000273109	0.000184531	0.00044191	8.8e-05	0.000842094	0	0	0	0	0	0	0	0.000600685	0	0	0	0	0	0	0	0	0	0	0	0	0	0	0	0	0	0	0	0	0	Eukaryota	Eukaryota_unclassified	Eukaryota_unclassified	Eukaryota_unclassified	Eukaryota_unclassified	Eukaryota_unclassified	Eukaryota_unclassified	Eukaryota_unclassified
OTU_3268	0	0	0	0	0	0	0.000292109	0.000182079	0	0	0	0	0	0	0	0	0	0	0	0	0	0	0	0	0	0	0	0	0	0	0	0	0	0	Eukaryota	Eukaryota_unclassified	Eukaryota_unclassified	Eukaryota_unclassified	Eukaryota_unclassified	Eukaryota_unclassified	Eukaryota_unclassified	Eukaryota_unclassified
OTU_19373	0	0.000553593	0.000168347	7.04e-05	0.000217315	0	0	0	0	0	0	0	0	0	0	0	0	0	0	0	0	0	0	0	0	0	0	0	0	0	0	0	0	0	Eukaryota	Eukaryota_unclassified	Eukaryota_unclassified	Eukaryota_unclassified	Eukaryota_unclassified	Eukaryota_unclassified	Eukaryota_unclassified	Eukaryota_unclassified
OTU_1315	0	0	6.31e-05	2.64e-05	2.72e-05	0	0	0.000193459	0	0.000105897	5.74e-05	0	0	2.36e-05	0	6.76e-05	0	0	1.97e-05	0.0013586	0.000304896	0.000999047	0.00266132	0.000635444	0.00339457	0.000845814	0.00136351	0	0.00323204	0	0	0.000125178	0.000237568	0.00252138	Eukaryota	Eukaryota_unclassified	Eukaryota_unclassified	Eukaryota_unclassified	Eukaryota_unclassified	Eukaryota_unclassified	Eukaryota_unclassified	Eukaryota_unclassified
OTU_2734	0	5.27e-05	6.31e-05	2.64e-05	0.000135822	1.59e-05	0	0	0	0	0	0	0	0	0	0	0	0	0	0	0	0	0	0	0	0	0	0	0	0	0	0	5.94e-05	1.47e-05	Eukaryota	Eukaryota_unclassified	Eukaryota_unclassified	Eukaryota_unclassified	Eukaryota_unclassified	Eukaryota_unclassified	Eukaryota_unclassified	Eukaryota_unclassified
OTU_1040	0.000546218	0.000579955	0.000967993	0.000413565	0.00298808	4.78e-05	0	0	0	0	0	0	0.00247258	0	0	0	0	0	0	0	0	0	0	0	0	0	0	0	0	0	0	0	0	0	Eukaryota	Eukaryota_unclassified	Eukaryota_unclassified	Eukaryota_unclassified	Eukaryota_unclassified	Eukaryota_unclassified	Eukaryota_unclassified	Eukaryota_unclassified
OTU_1732	0	0.000316339	8.42e-05	6.16e-05	0.000651944	4.78e-05	0	0	0	0	0	0	0	0	0	0	0	0	0	0	0	0	0	0	0	0	0	0	0	0	0	0	2.97e-05	0	Eukaryota	Eukaryota_unclassified	Eukaryota_unclassified	Eukaryota_unclassified	Eukaryota_unclassified	Eukaryota_unclassified	Eukaryota_unclassified	Eukaryota_unclassified
OTU_1347	0	0	0	0	0	0	0	0.000284498	2.73e-05	5.29e-05	1.44e-05	0	0	2.36e-05	8.7e-05	2.25e-05	0	0	0	0	0.000116151	0.000292029	0.000163773	0.00122382	0.000199681	0.000102081	0.000366315	0.000166237	0.000105393	0	0	0.000328592	0.000163328	0.00086995	Eukaryota	Eukaryota_unclassified	Eukaryota_unclassified	Eukaryota_unclassified	Eukaryota_unclassified	Eukaryota_unclassified	Eukaryota_unclassified	Eukaryota_unclassified
OTU_724	0	0	0	0	0	0	0	0.000785215	0	0	0	0	0	0	0	0	0	0	0	0	0	0	0	0	0	0	0	0	0	0	0	0	0	0	Eukaryota	Eukaryota_unclassified	Eukaryota_unclassified	Eukaryota_unclassified	Eukaryota_unclassified	Eukaryota_unclassified	Eukaryota_unclassified	Eukaryota_unclassified
OTU_682	0.000441176	0.0003427	0.00018939	0.000246379	0	0	9.74e-05	0.00201425	0	0	0	0	0	0	0	0.0237145	0.0174089	5.34e-05	0	0	0	0	0	0	0	0	0	0	0	0	0	0	0	0	Eukaryota	Eukaryota_unclassified	Eukaryota_unclassified	Eukaryota_unclassified	Eukaryota_unclassified	Eukaryota_unclassified	Eukaryota_unclassified	Eukaryota_unclassified
OTU_792	0	0	0	0	0	0	0.00159443	0.000716936	0	0	0	0	0	0	0	0	0	0	0	0	0	0	0	0	0	0	0	0	0	0.0166029	0	0	0	0	Eukaryota	Eukaryota_unclassified	Eukaryota_unclassified	Eukaryota_unclassified	Eukaryota_unclassified	Eukaryota_unclassified	Eukaryota_unclassified	Eukaryota_unclassified
OTU_1534	0	0	0	0	0	0	0	2.28e-05	1.36e-05	0.000105897	1.44e-05	0	1.4e-05	3.54e-05	0	0	0	0	3.95e-05	0	0.000362971	0.000215179	0.000204717	0.00018828	0.000368641	0.000116664	0.000122105	0.00619234	0	0	6.61e-05	4.69e-05	5.94e-05	0.00110587	Eukaryota	Eukaryota_unclassified	Eukaryota_unclassified	Eukaryota_unclassified	Eukaryota_unclassified	Eukaryota_unclassified	Eukaryota_unclassified	Eukaryota_unclassified
OTU_48	0	0	0	0	0	0	0.00294544	0.000352778	0	0	1.44e-05	0	0	0	0	0	0	0	0	0	0	0	0	0	0	0	0	0	0	0	0	0	0	0	Eukaryota	Eukaryota_unclassified	Eukaryota_unclassified	Eukaryota_unclassified	Eukaryota_unclassified	Eukaryota_unclassified	Eukaryota_unclassified	Eukaryota_unclassified
OTU_1046	0	0	0	0	0	0	0	0	0	0	0	0	0	0	0	0	0	0	0	0	4.36e-05	6.15e-05	4.09e-05	0	6.14e-05	2.92e-05	0.000366315	0	0.000175654	0	0	0	5.94e-05	0.00092893	Eukaryota	Eukaryota_unclassified	Eukaryota_unclassified	Eukaryota_unclassified	Eukaryota_unclassified	Eukaryota_unclassified	Eukaryota_unclassified	Eukaryota_unclassified
OTU_6050	0	7.91e-05	4.21e-05	8.8e-06	0	0	0	0	0	0	0	0	0	0	0	0	0	0	0	1.76e-05	0	1.54e-05	8.19e-05	2.35e-05	0.00010752	5.83e-05	0	0	0.000105393	0	0	0	0	0	Eukaryota	Eukaryota_unclassified	Eukaryota_unclassified	Eukaryota_unclassified	Eukaryota_unclassified	Eukaryota_unclassified	Eukaryota_unclassified	Eukaryota_unclassified
OTU_2242	0.00012605	0.000237254	0.000357737	0.000131989	0.00111374	4.78e-05	0	0	0	0	0	0	0.000684501	0	0	0	0	0	0	0	0	0	0	0	0	0	0	0	0	0	0	0	0	0	Eukaryota	Eukaryota_unclassified	Eukaryota_unclassified	Eukaryota_unclassified	Eukaryota_unclassified	Eukaryota_unclassified	Eukaryota_unclassified	Eukaryota_unclassified
OTU_486	0	0	0	0	0	0	0.000450335	1.14e-05	0	0	0	0	0	0	0	0	0	1.78e-05	0	0	0	0	0	0	0	0	0	0	0	0	0	0	0	0	Eukaryota	Eukaryota_unclassified	Eukaryota_unclassified	Eukaryota_unclassified	Eukaryota_unclassified	Eukaryota_unclassified	Eukaryota_unclassified	Eukaryota_unclassified
OTU_1076	0	0	0	0	0	1.59e-05	0	4.55e-05	0	0	0	0	0	0.000259474	0	0	0	0	0	0	0	0	1.36e-05	0	0	1.46e-05	4.07e-05	0	0	0	0	0.0034111	8.91e-05	0.00401062	Eukaryota	Eukaryota_unclassified	Eukaryota_unclassified	Eukaryota_unclassified	Eukaryota_unclassified	Eukaryota_unclassified	Eukaryota_unclassified	Eukaryota_unclassified
OTU_2672	4.2e-05	0.000316339	0.000483997	0.00012319	0.00146687	4.78e-05	0	0	0	0	0	0	1.4e-05	0	0	0	0	0	0	0	0	0	0	0	0	0	0	0	0	0	0	0	0	0	Eukaryota	Eukaryota_unclassified	Eukaryota_unclassified	Eukaryota_unclassified	Eukaryota_unclassified	Eukaryota_unclassified	Eukaryota_unclassified	Eukaryota_unclassified
OTU_832	0	0.00150261	0.00050504	0.000263978	0.000271643	0.000175134	0	0	0	0	0	0	0	0	1.74e-05	0	0	0	0	0	0	3.07e-05	0	0	0	0	0	0	0	0	0	0	4.45e-05	0	Eukaryota	Eukaryota_unclassified	Eukaryota_unclassified	Eukaryota_unclassified	Eukaryota_unclassified	Eukaryota_unclassified	Eukaryota_unclassified	Eukaryota_unclassified
OTU_888	0	0	0	0	0	0	0.000511191	0	0	0	0	0	0	0	0	0	0	0	0	0	0	0	0	0	0	0	0	0	0	0	0	0	0	0	Eukaryota	Eukaryota_unclassified	Eukaryota_unclassified	Eukaryota_unclassified	Eukaryota_unclassified	Eukaryota_unclassified	Eukaryota_unclassified	Eukaryota_unclassified
OTU_23075	0	5.27e-05	0.00018939	3.52e-05	8.15e-05	1.59e-05	0	0	0	0	0	0	0	0	0	0	0	0	0	0	0	0	0	0	0	0	0	0	0	0	0	0	0	0	Eukaryota	Eukaryota_unclassified	Eukaryota_unclassified	Eukaryota_unclassified	Eukaryota_unclassified	Eukaryota_unclassified	Eukaryota_unclassified	Eukaryota_unclassified
OTU_612	2.1e-05	0	0	2.64e-05	0	0	0.000158226	2.28e-05	0	0	0	0	0	0	0	0	0.000183573	0	0	0	0	0	0	0	0	0	0	0	0	0	0	0	0	0	Eukaryota	Eukaryota_unclassified	Eukaryota_unclassified	Eukaryota_unclassified	Eukaryota_unclassified	Eukaryota_unclassified	Eukaryota_unclassified	Eukaryota_unclassified
OTU_444	0	0	0	0	0	0	0.000109541	0	0	0	0	0	0	0	0	0.00295304	0.00240175	0.000551611	0.000177641	0	0	0	0	0	0	0	0	0	0	0	0	0	0	0	Eukaryota	Eukaryota_unclassified	Eukaryota_unclassified	Eukaryota_unclassified	Eukaryota_unclassified	Eukaryota_unclassified	Eukaryota_unclassified	Eukaryota_unclassified
OTU_1982	0	0	0	0	0	0	0	2.28e-05	0	0	0	0	0	0	0	0	1.53e-05	7.12e-05	0	1.76e-05	0.000464603	3.07e-05	1.36e-05	0.000258884	0.00010752	0	0	0	0	0	0	0	0	0	Eukaryota	Eukaryota_unclassified	Eukaryota_unclassified	Eukaryota_unclassified	Eukaryota_unclassified	Eukaryota_unclassified	Eukaryota_unclassified	Eukaryota_unclassified
OTU_3484	8.4e-05	0.000105446	0.000105217	0.00011439	0	0	0	0	0	0	0	0	0	0	0	9.02e-05	0.000122382	0	0	0	0	0	0	0	0	0	0	0	0	0	0	0	0	0	Eukaryota	Eukaryota_unclassified	Eukaryota_unclassified	Eukaryota_unclassified	Eukaryota_unclassified	Eukaryota_unclassified	Eukaryota_unclassified	Eukaryota_unclassified
OTU_1814	0	0.000131808	6.31e-05	0.000158387	0.00019015	0	0	0	0	0	0	0	0	0	0	0	0	0	0	0	0	0	0	0	0	0	0	0	0	0	0	0	0	0.000501327	Eukaryota	Eukaryota_unclassified	Eukaryota_unclassified	Eukaryota_unclassified	Eukaryota_unclassified	Eukaryota_unclassified	Eukaryota_unclassified	Eukaryota_unclassified
OTU_1516	0	0	0	0	0	0	0.000669417	0.003175	0.00948759	0	0	0	0	1.18e-05	0	0.000743897	0.000749591	0	0	0	0	0	0	0	0	0	0	0	0	0	0	0	0	0	Eukaryota	Eukaryota_unclassified	Eukaryota_unclassified	Eukaryota_unclassified	Eukaryota_unclassified	Eukaryota_unclassified	Eukaryota_unclassified	Eukaryota_unclassified
OTU_2290	0	0	0	0	0	0	0.000243424	0	0	0	0	0	0	0	0	0	0	0	0	0	0	0	0	0	0.00012288	0	0	0	0	0.01884	0	0	0	0	Eukaryota	Eukaryota_unclassified	Eukaryota_unclassified	Eukaryota_unclassified	Eukaryota_unclassified	Eukaryota_unclassified	Eukaryota_unclassified	Eukaryota_unclassified
OTU_1140	0	0	0	0	0	0	0	0	0	0	0	0	0	0	0	0.000360677	0.000168275	8.9e-05	0	0	0	1.54e-05	0	0	0	0	0	0	0	0	0	0	0	0	Eukaryota	Eukaryota_unclassified	Eukaryota_unclassified	Eukaryota_unclassified	Eukaryota_unclassified	Eukaryota_unclassified	Eukaryota_unclassified	Eukaryota_unclassified
OTU_1312	0	0	0	0	0	0	0.000133883	0	0	0	0	0	0	0	0	0.000541016	6.12e-05	1.78e-05	0	0	0	0	0	0	0	0	0	0	0	0	0	0	0	0	Eukaryota	Eukaryota_unclassified	Eukaryota_unclassified	Eukaryota_unclassified	Eukaryota_unclassified	Eukaryota_unclassified	Eukaryota_unclassified	Eukaryota_unclassified
OTU_1348	0	0	2.1e-05	0.000228781	0	0	0.00335926	0.0027767	0	0	0	0	0	0	0	0	0.00131561	5.34e-05	0	1.76e-05	1.45e-05	0	0	0	4.61e-05	0	0	0	0	0	0	0	0	0	Eukaryota	Eukaryota_unclassified	Eukaryota_unclassified	Eukaryota_unclassified	Eukaryota_unclassified	Eukaryota_unclassified	Eukaryota_unclassified	Eukaryota_unclassified
OTU_1446	0.000798319	0.000158169	0.00037878	0.000545554	0	0	3.65e-05	0.00175251	0	0	0	0	0	0	0	0.00155542	0.00119323	0	1.97e-05	0	0	0	0	0	0	0	0	0	0	0	0	0	0	0	Eukaryota	Eukaryota_unclassified	Eukaryota_unclassified	Eukaryota_unclassified	Eukaryota_unclassified	Eukaryota_unclassified	Eukaryota_unclassified	Eukaryota_unclassified
OTU_224	0	0	0	0	0	0	0	1.14e-05	0	0	0	0	0	0	0	0	0	0.00692183	0.00252645	0.000141153	2.9e-05	7.68e-05	2.73e-05	0	0	0	0	0	0	0	0	0	0	0	Eukaryota	Eukaryota_unclassified	Eukaryota_unclassified	Eukaryota_unclassified	Eukaryota_unclassified	Eukaryota_unclassified	Eukaryota_unclassified	Eukaryota_unclassified
OTU_2755	2.1e-05	0	0	8.8e-06	0	0	8.52e-05	0	0	0	0	0	0	0	0	0.000135254	0.000122382	3.56e-05	0	0	0	0	0	0	0	0	0	0	0	0	0	0	0	0	Eukaryota	Eukaryota_unclassified	Eukaryota_unclassified	Eukaryota_unclassified	Eukaryota_unclassified	Eukaryota_unclassified	Eukaryota_unclassified	Eukaryota_unclassified
OTU_338	0	0	0	0	0	0	0.000705931	0.000261738	0	0	0	0	0	0	0	0	0	0	0	0	0	0	0	0	0	0	0	0	0	0	0	0	0	0	Eukaryota	Eukaryota_unclassified	Eukaryota_unclassified	Eukaryota_unclassified	Eukaryota_unclassified	Eukaryota_unclassified	Eukaryota_unclassified	Eukaryota_unclassified
OTU_691	0	0.0113355	0.0182446	0.0180297	0.00296091	0.000111449	0	7.97e-05	0	0.00162375	0.00124944	0	0	0	0	0	0	0	0	7.06e-05	0	0.00012296	0.000382138	0.0018828	0.00112128	8.75e-05	0.000427368	0	0.00042157	0	0	6.26e-05	0.000415745	0.00286051	Eukaryota	Eukaryota_unclassified	Eukaryota_unclassified	Eukaryota_unclassified	Eukaryota_unclassified	Eukaryota_unclassified	Eukaryota_unclassified	Eukaryota_unclassified
OTU_7	0	0	0	0	0	0	0.000839815	0	0	0	0	0	0	0	0	0	0	0	0	0	0	0	0	0	0	0	0	0	0	0	0	0	0	0	Eukaryota	Eukaryota_unclassified	Eukaryota_unclassified	Eukaryota_unclassified	Eukaryota_unclassified	Eukaryota_unclassified	Eukaryota_unclassified	Eukaryota_unclassified
OTU_11	0	0	0	0	0	0	0.0026655	0.00100143	0	0	0	0	0	0	0	0	0	0	7.9e-05	0	0	0	0	0	0	0	0	0	0	0	0	0	0	1.47e-05	Eukaryota	Eukaryota_unclassified	Eukaryota_unclassified	Eukaryota_unclassified	Eukaryota_unclassified	Eukaryota_unclassified	Eukaryota_unclassified	Eukaryota_unclassified
OTU_1639	0	0	0	0	8.15e-05	0.000159213	0	0	0	0	0	0	0	0	0	0	0	0	0	0	0	0	0	0	0	0	0	0	0	0	0	0	2.97e-05	0	Eukaryota	Eukaryota_unclassified	Eukaryota_unclassified	Eukaryota_unclassified	Eukaryota_unclassified	Eukaryota_unclassified	Eukaryota_unclassified	Eukaryota_unclassified
OTU_1882	0	0.00084357	0.000778603	0.000387167	0.00019015	0	0	0	0	0	0	0	0	0	0	0	0	0	0	0	0	0	0	0	0	0	0	0	0	0	0	0	0	0	Eukaryota	Eukaryota_unclassified	Eukaryota_unclassified	Eukaryota_unclassified	Eukaryota_unclassified	Eukaryota_unclassified	Eukaryota_unclassified	Eukaryota_unclassified
OTU_1877	0	5.27e-05	8.42e-05	0.000131989	0.000842094	0.000143292	0	0	0	0	0	0	0	0	0	0	0	0	0	0	0	0	0	0	0	0	2.04e-05	0	0	0	0	0	0.000178176	4.42e-05	Eukaryota	Eukaryota_unclassified	Eukaryota_unclassified	Eukaryota_unclassified	Eukaryota_unclassified	Eukaryota_unclassified	Eukaryota_unclassified	Eukaryota_unclassified
OTU_3849	0	0	4.21e-05	2.64e-05	0	0	0	0	0	1.76e-05	0	0	0.00804638	0	0	0	0	0	0	0	0	0	0	0	0	0	0	0	0	0	0	0	0	0	Eukaryota	Eukaryota_unclassified	Eukaryota_unclassified	Eukaryota_unclassified	Eukaryota_unclassified	Eukaryota_unclassified	Eukaryota_unclassified	Eukaryota_unclassified
OTU_18638	0	0	0	0	0	0	0	0	0	0	0	0	0	0	0	0	0	0	0	1.76e-05	0	1.54e-05	0.000109182	4.71e-05	0.00012288	7.29e-05	0.000162807	0	0.000210785	0	0	0	2.97e-05	7.37e-05	Eukaryota	Eukaryota_unclassified	Eukaryota_unclassified	Eukaryota_unclassified	Eukaryota_unclassified	Eukaryota_unclassified	Eukaryota_unclassified	Eukaryota_unclassified
OTU_7830	0	0.000527232	8.42e-05	3.52e-05	2.72e-05	0	0	0	4.09e-05	0	0	0	0	0	0	0	0	0	0	0	0	0	0	0	0	0	0	0	0	0	0	0	0	0	Eukaryota	Eukaryota_unclassified	Eukaryota_unclassified	Eukaryota_unclassified	Eukaryota_unclassified	Eukaryota_unclassified	Eukaryota_unclassified	Eukaryota_unclassified
OTU_12606	0	0	0	0	0	0	0	0	0	0	0	0	0	0	6.96e-05	0	0	0	0	0	2.9e-05	0	0.000286603	0	0.000261121	0.000306243	0.000284912	0	0.000316178	0	0	0	4.45e-05	2.95e-05	Eukaryota	Eukaryota_unclassified	Eukaryota_unclassified	Eukaryota_unclassified	Eukaryota_unclassified	Eukaryota_unclassified	Eukaryota_unclassified	Eukaryota_unclassified
OTU_2285	0	0	0	2.64e-05	0	0	0	0	0	0	0	0	0	2.36e-05	0	0	0	0	0	0.000811631	1.45e-05	0.000568688	0.00073698	0.000117675	0.00141312	0.000116664	0.000529122	0	0.00428597	0	0	0	0.000118784	0.000339133	Eukaryota	Eukaryota_unclassified	Eukaryota_unclassified	Eukaryota_unclassified	Eukaryota_unclassified	Eukaryota_unclassified	Eukaryota_unclassified	Eukaryota_unclassified
OTU_20584	0	2.64e-05	6.31e-05	3.52e-05	5.43e-05	0.000143292	0	0	0	0	0	0	0	0	0	0	0	0	0	0	0	0	0	0	0	0	2.04e-05	0	0	0	0	0	7.42e-05	1.47e-05	Eukaryota	Eukaryota_unclassified	Eukaryota_unclassified	Eukaryota_unclassified	Eukaryota_unclassified	Eukaryota_unclassified	Eukaryota_unclassified	Eukaryota_unclassified
OTU_2458	0	0	2.1e-05	0	0	3.18e-05	0	0	0	0	1.44e-05	0	0	4.72e-05	0	0	0	0	0	0.000141153	2.9e-05	0.00012296	0.000409433	0.000211815	0.000844802	0.000102081	0.000508771	0	0.00129984	0	0	0	4.45e-05	0.000280153	Eukaryota	Eukaryota_unclassified	Eukaryota_unclassified	Eukaryota_unclassified	Eukaryota_unclassified	Eukaryota_unclassified	Eukaryota_unclassified	Eukaryota_unclassified
OTU_5151	0	0	0	0	0	0	0.00040165	0.000113799	0	0	0	0	0	0	0	0	0	0	0	0	0	0	0	0	0	0	0	0	0	0	0	0	0	0	Eukaryota	Eukaryota_unclassified	Eukaryota_unclassified	Eukaryota_unclassified	Eukaryota_unclassified	Eukaryota_unclassified	Eukaryota_unclassified	Eukaryota_unclassified
OTU_4022	0.00214286	0	0	8.8e-06	0	0	0	0	0	0	0	3.47e-05	0	2.36e-05	3.48e-05	0	0	0	0	0	0	0	0	0	0	2.92e-05	2.04e-05	0	3.51e-05	0	0	0	0	1.47e-05	Eukaryota	Eukaryota_unclassified	Eukaryota_unclassified	Eukaryota_unclassified	Eukaryota_unclassified	Eukaryota_unclassified	Eukaryota_unclassified	Eukaryota_unclassified
OTU_4927	0	0	0	0	0	0	0	0	0	0	0	1.73e-05	0	1.18e-05	0	0	0	0	0	0	0	0	9.55e-05	0	1.54e-05	8.75e-05	0.000101754	0	0.000105393	0	0	0	1.48e-05	1.47e-05	Eukaryota	Eukaryota_unclassified	Eukaryota_unclassified	Eukaryota_unclassified	Eukaryota_unclassified	Eukaryota_unclassified	Eukaryota_unclassified	Eukaryota_unclassified
OTU_1157	0	0	0	0	0	0	0	0.000648656	0	0	0	0	0	0	6.96e-05	0	0	0	0	0	0.000537197	0.000230549	0	0	0	0	8.14e-05	0	0	0	0	0	0	0	Eukaryota	Eukaryota_unclassified	Eukaryota_unclassified	Eukaryota_unclassified	Eukaryota_unclassified	Eukaryota_unclassified	Eukaryota_unclassified	Eukaryota_unclassified
OTU_17730	0	0	0	0	0	0	0	0	0	0	0	0	0	0	1.74e-05	0	0	0	0	0	0	0	4.09e-05	0	0	2.92e-05	2.04e-05	0	3.51e-05	0	0	0	0.000133632	0.000191684	Eukaryota	Eukaryota_unclassified	Eukaryota_unclassified	Eukaryota_unclassified	Eukaryota_unclassified	Eukaryota_unclassified	Eukaryota_unclassified	Eukaryota_unclassified
OTU_3615	2.1e-05	0	2.1e-05	1.76e-05	0	0.000541324	0	0	0	0	0	0	0	0	0	0	0	0	0	0	0	0	0	0	0	0	2.04e-05	0	0	0	0	3.13e-05	2.97e-05	2.95e-05	Eukaryota	Eukaryota_unclassified	Eukaryota_unclassified	Eukaryota_unclassified	Eukaryota_unclassified	Eukaryota_unclassified	Eukaryota_unclassified	Eukaryota_unclassified
OTU_2063	0	0	0	0	0	0	0	0	0	0	0	0	0	0	0	0	0	0	0	0	0	0	0	0	0	0	0	0	0	0.00113201	0	0	1.48e-05	0	Eukaryota	Eukaryota_unclassified	Eukaryota_unclassified	Eukaryota_unclassified	Eukaryota_unclassified	Eukaryota_unclassified	Eukaryota_unclassified	Eukaryota_unclassified
OTU_65	0	0	0	0	0	0	0.000669417	1.14e-05	0	0	0	0	0	0	0	0	0	0	0	0	0	0	0	0	0	0	0	0	0	0	0	0	0	0	Eukaryota	Eukaryota_unclassified	Eukaryota_unclassified	Eukaryota_unclassified	Eukaryota_unclassified	Eukaryota_unclassified	Eukaryota_unclassified	Eukaryota_unclassified
OTU_557	0	0	4.21e-05	0	0	0	0	4.55e-05	0	0	0	0	0	0.000448182	0	0	0	0	0.00465814	0.00285835	0.000958244	0.00156774	0.000313899	2.35e-05	0.000491521	0.000189579	0.000122105	0	0.00042157	0	0	0	0.000133632	0.000250664	Eukaryota	Eukaryota_unclassified	Eukaryota_unclassified	Eukaryota_unclassified	Eukaryota_unclassified	Eukaryota_unclassified	Eukaryota_unclassified	Eukaryota_unclassified
OTU_5786	0	0	0	0	0	0	0	0	0	0	0	0	0	0	0	0	0	0	0	0	0	0	1.36e-05	0	0	0.000102081	2.04e-05	0	0	0	0	3.13e-05	7.42e-05	0.000132704	Eukaryota	Eukaryota_unclassified	Eukaryota_unclassified	Eukaryota_unclassified	Eukaryota_unclassified	Eukaryota_unclassified	Eukaryota_unclassified	Eukaryota_unclassified
OTU_184	0	0	0	0	0	0	0	0	0	0	0	0	0	0	0	0	0	0	0	0	0	0	0	0	0	0	2.04e-05	0	0	0	0	6.26e-05	0.000668161	7.37e-05	Eukaryota	Eukaryota_unclassified	Eukaryota_unclassified	Eukaryota_unclassified	Eukaryota_unclassified	Eukaryota_unclassified	Eukaryota_unclassified	Eukaryota_unclassified
OTU_5028	0	0	0	0	0	0	0	0	0	0	0	0	0	0	0	0	0	0	1.97e-05	0.000599901	8.71e-05	0.00012296	0.000204717	0	0.00010752	0	4.07e-05	0	0.000140523	0	0	0	0	4.42e-05	Eukaryota	Eukaryota_unclassified	Eukaryota_unclassified	Eukaryota_unclassified	Eukaryota_unclassified	Eukaryota_unclassified	Eukaryota_unclassified	Eukaryota_unclassified
OTU_7697	0	0	0	0	0	0	0	0	0	0	0	0	0	1.18e-05	0	0	0	0	0	0	0	0	1.36e-05	0	1.54e-05	0	0	0	0.000351309	0	0	0	0	5.9e-05	Eukaryota	Eukaryota_unclassified	Eukaryota_unclassified	Eukaryota_unclassified	Eukaryota_unclassified	Eukaryota_unclassified	Eukaryota_unclassified	Eukaryota_unclassified
OTU_3022	0	0	8.42e-05	6.16e-05	2.72e-05	0	0	0	0	0	0	0	0	0	0	0	0	0	0	1.76e-05	0	7.68e-05	8.19e-05	2.35e-05	3.07e-05	5.83e-05	0	0	3.51e-05	0	0	0	0	0	Eukaryota	Eukaryota_unclassified	Eukaryota_unclassified	Eukaryota_unclassified	Eukaryota_unclassified	Eukaryota_unclassified	Eukaryota_unclassified	Eukaryota_unclassified
OTU_6019	0	2.64e-05	0	0	0	0	0	0	0	0	0	0	0	0	3.48e-05	0	0	0	0	1.76e-05	0	4.61e-05	2.73e-05	2.35e-05	3.07e-05	0.000408324	0	0	0	0	0	1.56e-05	1.48e-05	1.47e-05	Eukaryota	Eukaryota_unclassified	Eukaryota_unclassified	Eukaryota_unclassified	Eukaryota_unclassified	Eukaryota_unclassified	Eukaryota_unclassified	Eukaryota_unclassified
OTU_1970	0	0	0	0	0	0	2.43e-05	3.41e-05	0	0	0	0	0	0	0	0	0	0	7.9e-05	0	0	0	0	0	1.54e-05	1.46e-05	0	0	0	8.09e-05	0.000528838	0	0	0.000619286	Eukaryota	Eukaryota_unclassified	Eukaryota_unclassified	Eukaryota_unclassified	Eukaryota_unclassified	Eukaryota_unclassified	Eukaryota_unclassified	Eukaryota_unclassified
OTU_2094	0	7.91e-05	4.21e-05	1.76e-05	0	0	0	0	0	0	1.44e-05	0	0	0	0	0	0	0	1.97e-05	7.06e-05	4.36e-05	0.00012296	0.000300251	9.41e-05	0.000537601	4.37e-05	0.000264561	0	0.000772879	0	0	0	7.42e-05	0.000162194	Eukaryota	Eukaryota_unclassified	Eukaryota_unclassified	Eukaryota_unclassified	Eukaryota_unclassified	Eukaryota_unclassified	Eukaryota_unclassified	Eukaryota_unclassified
OTU_2829	0	0	0	0	0	0	0	0	0	1.76e-05	0	0	0	1.18e-05	0	0	0	0	0	1.76e-05	1.45e-05	0	0.000191069	9.41e-05	0.000430081	4.37e-05	0.000284912	0	0.000913402	0	0	0	4.45e-05	0.000221174	Eukaryota	Eukaryota_unclassified	Eukaryota_unclassified	Eukaryota_unclassified	Eukaryota_unclassified	Eukaryota_unclassified	Eukaryota_unclassified	Eukaryota_unclassified
OTU_3217	0	0.00353245	0.000547127	0.000228781	0.000516122	0	0	0	0	0	0	0	0	0	1.74e-05	0	0	0	0	0	0	0.00013833	1.36e-05	2.35e-05	3.07e-05	0	2.04e-05	0	0	0	0	0	0	1.47e-05	Eukaryota	Eukaryota_unclassified	Eukaryota_unclassified	Eukaryota_unclassified	Eukaryota_unclassified	Eukaryota_unclassified	Eukaryota_unclassified	Eukaryota_unclassified
OTU_22593	0	0	0	0	0	0	0	0	0	0	0	0	0	4.72e-05	0.000365376	0	0	0	0	0	0	0	0	0	0	1.46e-05	0	0	0	0	0	0	0	0	Eukaryota	Eukaryota_unclassified	Eukaryota_unclassified	Eukaryota_unclassified	Eukaryota_unclassified	Eukaryota_unclassified	Eukaryota_unclassified	Eukaryota_unclassified
OTU_4997	0	0.000131808	6.31e-05	5.28e-05	8.15e-05	0	0	0	0	0	0	0	0	0	0	0	0	0	0	0	0	0	0	0	0	5.83e-05	0	0	0	0	0	0	0	2.95e-05	Eukaryota	Eukaryota_unclassified	Eukaryota_unclassified	Eukaryota_unclassified	Eukaryota_unclassified	Eukaryota_unclassified	Eukaryota_unclassified	Eukaryota_unclassified
OTU_6179	0	0.000527232	0.000294607	7.92e-05	0.00019015	0	0	0	0	0	1.44e-05	0	0	0	0	0	0	0	0	0	0	0	0	0	0	0	0	0	0	0	0	0	0	0	Eukaryota	Eukaryota_unclassified	Eukaryota_unclassified	Eukaryota_unclassified	Eukaryota_unclassified	Eukaryota_unclassified	Eukaryota_unclassified	Eukaryota_unclassified
OTU_993	0	0.00250435	0.000336693	0.000202383	0.000162986	0	0	0	0	0	0	0	0	0	0	0	0	0	0	0	0	3.07e-05	0	0	0	0	0	0	3.51e-05	0	0	0	0	0	Eukaryota	Eukaryota_unclassified	Eukaryota_unclassified	Eukaryota_unclassified	Eukaryota_unclassified	Eukaryota_unclassified	Eukaryota_unclassified	Eukaryota_unclassified
OTU_1619	0	0	0	0	0	0	0	0	0	0	0	0	0	0	0	0	0	0	0	1.76e-05	0	0.000553318	0.0015149	0.000588374	0.00279553	0.000627069	0.000997192	0	0.0028456	0	0	0	0.000564225	2.95e-05	Eukaryota	Eukaryota_unclassified	Eukaryota_unclassified	Eukaryota_unclassified	Eukaryota_unclassified	Eukaryota_unclassified	Eukaryota_unclassified	Eukaryota_unclassified
OTU_7164	0	0	0	0	0	1.59e-05	0	0	0	0	0	0	0	0	0	0	0	0	0	0	2.9e-05	4.61e-05	4.09e-05	4.71e-05	4.61e-05	0	0	0	0.000245916	0	0	0	0	5.9e-05	Eukaryota	Eukaryota_unclassified	Eukaryota_unclassified	Eukaryota_unclassified	Eukaryota_unclassified	Eukaryota_unclassified	Eukaryota_unclassified	Eukaryota_unclassified
OTU_1543	0	0	0	0	0	0	0	0.000386918	0	1.76e-05	0	0	0	0	0	0	0	0	0	0	0	0	0	0	0	0	0	0	0	0	0	0	0.00170752	0	Eukaryota	Eukaryota_unclassified	Eukaryota_unclassified	Eukaryota_unclassified	Eukaryota_unclassified	Eukaryota_unclassified	Eukaryota_unclassified	Eukaryota_unclassified
OTU_125	0	0	0	0	0	0	3.65e-05	0.000113799	0	0	0	0	0	1.18e-05	0	0	0	0.000142351	0	0	0.000275858	0	1.36e-05	0.000305954	0	0	0.000162807	0.000332474	3.51e-05	2.7e-05	0.0013882	0.00231579	0	0.000353878	Eukaryota	Eukaryota_unclassified	Eukaryota_unclassified	Eukaryota_unclassified	Eukaryota_unclassified	Eukaryota_unclassified	Eukaryota_unclassified	Eukaryota_unclassified
OTU_2841	0	0	2.1e-05	8.8e-06	0.000516122	0	0	0	0	0	0	0	0	0	0	0	0	0	0	0	0	0	0	0	0	0	0	0	0	0	0	0	0	0	Eukaryota	Eukaryota_unclassified	Eukaryota_unclassified	Eukaryota_unclassified	Eukaryota_unclassified	Eukaryota_unclassified	Eukaryota_unclassified	Eukaryota_unclassified
OTU_6685	0	0.000316339	0.000168347	9.68e-05	0.000244479	4.78e-05	0	0	0	0	0	0	0	0	0	0	0	0	0	0	0	0	0	0	0	0	0	0	0	0	0	0	0	0	Eukaryota	Eukaryota_unclassified	Eukaryota_unclassified	Eukaryota_unclassified	Eukaryota_unclassified	Eukaryota_unclassified	Eukaryota_unclassified	Eukaryota_unclassified
OTU_1430	0	0	0	0	0	0	0.00059639	0.000330018	0	0	0	0	0	0	0	0	0	3.56e-05	3.95e-05	0	1.45e-05	4.61e-05	0	0	1.54e-05	0	0	0	0	0	0	0	0	0	Eukaryota	Eukaryota_unclassified	Eukaryota_unclassified	Eukaryota_unclassified	Eukaryota_unclassified	Eukaryota_unclassified	Eukaryota_unclassified	Eukaryota_unclassified
OTU_811	0	0	0	0	0	0	0	0.00104695	1.36e-05	0	2.87e-05	3.47e-05	0	1.18e-05	1.74e-05	0	0	0	0	0	0	0.000215179	1.36e-05	2.35e-05	0	0	2.04e-05	0	0	0	0.00105768	0.00270697	0	0.000383368	Eukaryota	Eukaryota_unclassified	Eukaryota_unclassified	Eukaryota_unclassified	Eukaryota_unclassified	Eukaryota_unclassified	Eukaryota_unclassified	Eukaryota_unclassified
OTU_17282	0	0.000263616	8.42e-05	0.000105591	5.43e-05	0	0	0	0	0	0	0	0	0	0	0	0	0	0	0	0	0	0	0	0	0	0	0	0	0	0	0	0	0	Eukaryota	Eukaryota_unclassified	Eukaryota_unclassified	Eukaryota_unclassified	Eukaryota_unclassified	Eukaryota_unclassified	Eukaryota_unclassified	Eukaryota_unclassified
OTU_17240	0	0.000105446	0.000483997	0.000158387	5.43e-05	0	0	0	0	0	0	0	0	0	0	0	0	0	0	0	0	0	0	0	0	0	0	0	0	0	0	0	0	0	Eukaryota	Eukaryota_unclassified	Eukaryota_unclassified	Eukaryota_unclassified	Eukaryota_unclassified	Eukaryota_unclassified	Eukaryota_unclassified	Eukaryota_unclassified
OTU_10438	0	0.000448147	0.000168347	5.28e-05	5.43e-05	1.59e-05	0	0	0	0	0	0	0	0	0	0	0	0	0	0	0	0	0	0	0	0	0	0	0	0	0	0	0	0	Eukaryota	Eukaryota_unclassified	Eukaryota_unclassified	Eukaryota_unclassified	Eukaryota_unclassified	Eukaryota_unclassified	Eukaryota_unclassified	Eukaryota_unclassified
OTU_3198	0	0.000210893	2.1e-05	3.52e-05	0.000108657	0	0	0	0	0	0	0	0	0	0	0	0	0	0	0	0	0	0	2.35e-05	0	0	0	0	0	0	0	3.13e-05	0	0	Eukaryota	Eukaryota_unclassified	Eukaryota_unclassified	Eukaryota_unclassified	Eukaryota_unclassified	Eukaryota_unclassified	Eukaryota_unclassified	Eukaryota_unclassified
OTU_1932	0	0	0	0	0	0	0.000206911	0	0	0	0	0	0	0	0	0	0	1.78e-05	0	1.76e-05	0	0	0	0	0	0	0	0	0	0	0	0.000359887	0	0	Eukaryota	Eukaryota_unclassified	Eukaryota_unclassified	Eukaryota_unclassified	Eukaryota_unclassified	Eukaryota_unclassified	Eukaryota_unclassified	Eukaryota_unclassified
OTU_2487	0	0	0	0	0	0	0	2.28e-05	0	0	0	0	0	0	0	0	0	0	0	0.00072341	0.000101632	0.0001537	0.000518616	7.06e-05	0.000783362	0.000247911	0.000122105	0	0.00119445	0	0	0	2.97e-05	0.000855205	Eukaryota	Eukaryota_unclassified	Eukaryota_unclassified	Eukaryota_unclassified	Eukaryota_unclassified	Eukaryota_unclassified	Eukaryota_unclassified	Eukaryota_unclassified
OTU_4373	0	2.64e-05	0	1.76e-05	0	1.59e-05	0	0	0	0	0	0	0	0	0	0	0	0	0	0.000194086	7.26e-05	9.22e-05	0.000573207	0	0.000460801	0.000116664	0.000183158	0	0.000526963	0	0	0	4.45e-05	0.000206429	Eukaryota	Eukaryota_unclassified	Eukaryota_unclassified	Eukaryota_unclassified	Eukaryota_unclassified	Eukaryota_unclassified	Eukaryota_unclassified	Eukaryota_unclassified
OTU_8166	0	0.000263616	0.000210433	0.000246379	0.000108657	0	0	0	0	0	0	0	0	0	0	0	0	0	0	0	0	0	0	0	0	0	0	0	0	0	0	0	0	0	Eukaryota	Eukaryota_unclassified	Eukaryota_unclassified	Eukaryota_unclassified	Eukaryota_unclassified	Eukaryota_unclassified	Eukaryota_unclassified	Eukaryota_unclassified
OTU_31	0	0	0	0	0	0	0.00227602	0	0	0	0	0	0	0	0	0	0	0	0	0	0	0	0	0	0	0	0	0	0	0	0	0	0.000267265	0	Eukaryota	Eukaryota_unclassified	Eukaryota_unclassified	Eukaryota_unclassified	Eukaryota_unclassified	Eukaryota_unclassified	Eukaryota_unclassified	Eukaryota_unclassified
OTU_195	0	0	0	0	0	0	0.000961527	0.000762455	0	0	0	0	0	0	0	0	0	0	0	0	0	0	0	0	0	0	0	0	0	0	0	0	0	0	Eukaryota	Eukaryota_unclassified	Eukaryota_unclassified	Eukaryota_unclassified	Eukaryota_unclassified	Eukaryota_unclassified	Eukaryota_unclassified	Eukaryota_unclassified
OTU_54	0	0	0	0	0	0	0.00069376	0	0	0	0	0	0	0	0	0	0	0	0	0	0	0	0	0	0	0	0	0	0	0	0	0	0	0	Eukaryota	Eukaryota_unclassified	Eukaryota_unclassified	Eukaryota_unclassified	Eukaryota_unclassified	Eukaryota_unclassified	Eukaryota_unclassified	Eukaryota_unclassified
OTU_106	0	0	0	0	0	0	0.000705931	0	0	0	0	0	0	0	0	0	0	0	0	0	0	0	0	0	0	0	0	0	0	0	0	0	0	0	Eukaryota	Eukaryota_unclassified	Eukaryota_unclassified	Eukaryota_unclassified	Eukaryota_unclassified	Eukaryota_unclassified	Eukaryota_unclassified	Eukaryota_unclassified
OTU_45	0	0	0	0	0	0	0.000973698	6.83e-05	0	0	0	0	0	0	0	0	0	0	0	0	0	0	0	0	0	0	0	0	0	0	0	0	0	0	Eukaryota	Eukaryota_unclassified	Eukaryota_unclassified	Eukaryota_unclassified	Eukaryota_unclassified	Eukaryota_unclassified	Eukaryota_unclassified	Eukaryota_unclassified
OTU_734	0	0	0	0	0	0	0.000511191	3.41e-05	0	0	0	0	0	0	0	0	0	0	0	0	0	0	0	0	0	0	0	0	0	0	0	0	0	0	Eukaryota	Eukaryota_unclassified	Eukaryota_unclassified	Eukaryota_unclassified	Eukaryota_unclassified	Eukaryota_unclassified	Eukaryota_unclassified	Eukaryota_unclassified
OTU_91	0	0	0	0	0	0	0.000827643	0	0	0	0	0	0	0	0	0	0	0	0	0	0	0	0	0	0	0	0	0	0	0	0	0	0	0	Eukaryota	Eukaryota_unclassified	Eukaryota_unclassified	Eukaryota_unclassified	Eukaryota_unclassified	Eukaryota_unclassified	Eukaryota_unclassified	Eukaryota_unclassified
OTU_2128	0	0	0	0	0	0	0.000292109	0.000853495	0	0	0	0	0	0	0	0	0	0	0	0	0	0	0	0	0	0	4.07e-05	0	0	0	0	0	0	0	Eukaryota	Eukaryota_unclassified	Eukaryota_unclassified	Eukaryota_unclassified	Eukaryota_unclassified	Eukaryota_unclassified	Eukaryota_unclassified	Eukaryota_unclassified
OTU_1333	0	0	0	0	0	0	0.000328623	0.000113799	0	0	0	0	0	0	0	0	0	0	0	0	0	0	0	0	0	0	0	0	0	0	0	0	0	0	Eukaryota	Eukaryota_unclassified	Eukaryota_unclassified	Eukaryota_unclassified	Eukaryota_unclassified	Eukaryota_unclassified	Eukaryota_unclassified	Eukaryota_unclassified
OTU_52	0	0	0	0	0	0	0.00069376	0	0	0	0	0	0	0	0	0	0	0	0	0	0	0	0	0	0	0	0	0	0	0	0	0	0	0	Eukaryota	Eukaryota_unclassified	Eukaryota_unclassified	Eukaryota_unclassified	Eukaryota_unclassified	Eukaryota_unclassified	Eukaryota_unclassified	Eukaryota_unclassified
OTU_490	0	0	0	0	0	0	0.000133883	3.41e-05	0	0	0	0	0	0	0	0	0	0	0	0	0	0	0	0	0	0	0	0	0	0	0	0	0	0	Eukaryota	Eukaryota_unclassified	Eukaryota_unclassified	Eukaryota_unclassified	Eukaryota_unclassified	Eukaryota_unclassified	Eukaryota_unclassified	Eukaryota_unclassified
OTU_9453	0	0	0	0	0	0	0.00059639	0.000113799	0	0	0	0	0	0	0	0	0	0	0	0	0	0	0	0	0	0	0	0	0	0	0	0	0	0	Eukaryota	Eukaryota_unclassified	Eukaryota_unclassified	Eukaryota_unclassified	Eukaryota_unclassified	Eukaryota_unclassified	Eukaryota_unclassified	Eukaryota_unclassified
OTU_471	0	0	0	0	0	0	0.00019474	0.000182079	0	0	0	0	0	0	0	0	0	0	0	0	0	1.54e-05	0	0	0	0	0	0	0	0	0	0	0	0	Eukaryota	Eukaryota_unclassified	Eukaryota_unclassified	Eukaryota_unclassified	Eukaryota_unclassified	Eukaryota_unclassified	Eukaryota_unclassified	Eukaryota_unclassified
OTU_12	0	0	0	0	0	0	0.00103455	0	0	0	0	0	0	0	0	0	0	0	0	0	0	0	0	0	0	0	0	0	0	0	0	0	0	0	Eukaryota	Eukaryota_unclassified	Eukaryota_unclassified	Eukaryota_unclassified	Eukaryota_unclassified	Eukaryota_unclassified	Eukaryota_unclassified	Eukaryota_unclassified
OTU_20	0	0	0	0	0	0	0.00195957	0.000534857	0	0	0	0	0	0	0	0	0	0	0	0	0	0	0	0	0	0	0	0	0	0	0	0	1.48e-05	0	Eukaryota	Eukaryota_unclassified	Eukaryota_unclassified	Eukaryota_unclassified	Eukaryota_unclassified	Eukaryota_unclassified	Eukaryota_unclassified	Eukaryota_unclassified
OTU_2065	0	0	2.1e-05	0	0	0	0	0	0	0	0	0	0	0	0	0.00126237	0.000214169	5.34e-05	0	0	0	0	0	0	0	0	0	0	0	0	0	0	0	0	Eukaryota	Eukaryota_unclassified	Eukaryota_unclassified	Eukaryota_unclassified	Eukaryota_unclassified	Eukaryota_unclassified	Eukaryota_unclassified	Eukaryota_unclassified
OTU_55	0	0	0	0	0	0	0.000925013	1.14e-05	0	0	0	0	0	0	0	0	0	0	0	0	0	0	0	0	0	0	0	0	0	0	0	0	0	0	Eukaryota	Eukaryota_unclassified	Eukaryota_unclassified	Eukaryota_unclassified	Eukaryota_unclassified	Eukaryota_unclassified	Eukaryota_unclassified	Eukaryota_unclassified
OTU_650	0	0	0	0	0	0	0.000328623	4.55e-05	0	0	0	0	0	0	0	0	0	0	0	0	0	0	0	0	0	0	0	0	0	0	0	0	0	0	Eukaryota	Eukaryota_unclassified	Eukaryota_unclassified	Eukaryota_unclassified	Eukaryota_unclassified	Eukaryota_unclassified	Eukaryota_unclassified	Eukaryota_unclassified
OTU_390	0	0	0	0	0	0	0.000413822	0.000819355	0	0	0	0	0	0	0	0	0	0	0	0	0	0	0	0	0	0	0	0	0	0	0	0	0	0	Eukaryota	Eukaryota_unclassified	Eukaryota_unclassified	Eukaryota_unclassified	Eukaryota_unclassified	Eukaryota_unclassified	Eukaryota_unclassified	Eukaryota_unclassified
OTU_23	0	0	0	0	0	0	0.000352966	0.00682796	1.36e-05	0	0	0	0	0	8.7e-05	2.25e-05	0	7.12e-05	3.95e-05	1.76e-05	4.36e-05	7.68e-05	1.36e-05	0.000635444	3.07e-05	0	6.11e-05	0.000374034	3.51e-05	0	0.00158651	0.00109531	0	0	Eukaryota	Eukaryota_unclassified	Eukaryota_unclassified	Eukaryota_unclassified	Eukaryota_unclassified	Eukaryota_unclassified	Eukaryota_unclassified	Eukaryota_unclassified
OTU_85	0	0	0	0	0	0	0.000133883	0	0	0	0	0	0	0	0	0	0	0	0	0	0	0	0	0	0	0	0	0.000249356	0	0	0	0	0	0	Eukaryota	Eukaryota_unclassified	Eukaryota_unclassified	Eukaryota_unclassified	Eukaryota_unclassified	Eukaryota_unclassified	Eukaryota_unclassified	Eukaryota_unclassified
OTU_239	0	0	0	0	0	0	0.000328623	0.000227599	0	0	0	0	0	0	0	0	0	0	0	0	0	0	0	0	0	0	0	0.000166237	0	0	0	0	0	0	Eukaryota	Eukaryota_unclassified	Eukaryota_unclassified	Eukaryota_unclassified	Eukaryota_unclassified	Eukaryota_unclassified	Eukaryota_unclassified	Eukaryota_unclassified
OTU_214	0	0	0	0	0	0	0.00154575	7.97e-05	0	0	0	0	0	0	0	0	0	0	0	0	0	0	0	0	0	0	0	0	0	8.09e-05	0	0.000125178	0	0	Eukaryota	Eukaryota_unclassified	Eukaryota_unclassified	Eukaryota_unclassified	Eukaryota_unclassified	Eukaryota_unclassified	Eukaryota_unclassified	Eukaryota_unclassified
OTU_150	0	0	0	0	0	0	0.00019474	1.14e-05	0	0	0	0	0	0	0	0	0	0	0	0	0	0	0	0	0	0	0	0	0	0	0	0	0	0	Eukaryota	Eukaryota_unclassified	Eukaryota_unclassified	Eukaryota_unclassified	Eukaryota_unclassified	Eukaryota_unclassified	Eukaryota_unclassified	Eukaryota_unclassified
OTU_2254	0	0	0	0	0	0	7.3e-05	2.28e-05	0	0	1.44e-05	0	0	0	0	0	0	0	1.97e-05	0	0	0	0	9.41e-05	0	0	4.07e-05	0.000166237	0	0.000404291	0	0	0	5.9e-05	Eukaryota	Eukaryota_unclassified	Eukaryota_unclassified	Eukaryota_unclassified	Eukaryota_unclassified	Eukaryota_unclassified	Eukaryota_unclassified	Eukaryota_unclassified
OTU_26	0	0	0	0	0	0	0.00726622	0.000853495	0	0	0	1.73e-05	0	0	0	0	0	0	0	0	0	0	0	0	1.54e-05	0	0	0	0	0	0	0	0	0.000294898	Eukaryota	Eukaryota_unclassified	Eukaryota_unclassified	Eukaryota_unclassified	Eukaryota_unclassified	Eukaryota_unclassified	Eukaryota_unclassified	Eukaryota_unclassified
OTU_1567	0	0	0	0	0	0	0.000523363	1.14e-05	0	0	0	0	0	0	0	0	0	0	0	0	0	0	0	0	0	0	0	0	0	0	0	0	0	0	Eukaryota	Eukaryota_unclassified	Eukaryota_unclassified	Eukaryota_unclassified	Eukaryota_unclassified	Eukaryota_unclassified	Eukaryota_unclassified	Eukaryota_unclassified
OTU_437	0	0	0	0	0	0	0.000681589	4.55e-05	0	0	0	0	0	0	0	0	0	0	0	0	0	0	0	0	0	0	0	0	0	0	0	0	0	0	Eukaryota	Eukaryota_unclassified	Eukaryota_unclassified	Eukaryota_unclassified	Eukaryota_unclassified	Eukaryota_unclassified	Eukaryota_unclassified	Eukaryota_unclassified
OTU_1566	0	0	0	0	0	0	0.000839815	5.69e-05	0	0	0	0	0	0	0	0	0	0	0	0	0	0	0	0	0	0	0	0	0	0	0	0	0	0	Eukaryota	Eukaryota_unclassified	Eukaryota_unclassified	Eukaryota_unclassified	Eukaryota_unclassified	Eukaryota_unclassified	Eukaryota_unclassified	Eukaryota_unclassified
OTU_2424	0	0	0	0	0	0	3.65e-05	0.000443817	0	0	0	0	0	0	0	0	0	0	0	0	0	0	0	0	0	0	0	0	0	0	0	0	0	0	Eukaryota	Eukaryota_unclassified	Eukaryota_unclassified	Eukaryota_unclassified	Eukaryota_unclassified	Eukaryota_unclassified	Eukaryota_unclassified	Eukaryota_unclassified
OTU_2701	0	0	0	0	0	0	0.000450335	6.83e-05	0	1.76e-05	0	0	0	0	0	0	0	0	0	0	0	0	0	0	0	0	0	0	0	0	0	0	0	0	Eukaryota	Eukaryota_unclassified	Eukaryota_unclassified	Eukaryota_unclassified	Eukaryota_unclassified	Eukaryota_unclassified	Eukaryota_unclassified	Eukaryota_unclassified
OTU_3043	0	0	0	0	0	0	0	1.14e-05	0	0	0	0	0	0	0	0	0	0	0	0	0	0	0	0	0	1.46e-05	0	0	0	0	0.00760205	0	0	0	Eukaryota	Eukaryota_unclassified	Eukaryota_unclassified	Eukaryota_unclassified	Eukaryota_unclassified	Eukaryota_unclassified	Eukaryota_unclassified	Eukaryota_unclassified
OTU_5174	0	0	0	0	0	0	0.000340794	9.1e-05	0	0	0	0	0	0	0	0	0	0	0	0	0	0	0	0	0	0	0	0	0	0	0	0	0	0	Eukaryota	Eukaryota_unclassified	Eukaryota_unclassified	Eukaryota_unclassified	Eukaryota_unclassified	Eukaryota_unclassified	Eukaryota_unclassified	Eukaryota_unclassified
OTU_8079	0	0	0	0	0	0	0.00049902	1.14e-05	0	0	0	0	0	0	0	0	0	0	0	0	0	0	0	0	0	0	0	0	0	0	0	0	0	0	Eukaryota	Eukaryota_unclassified	Eukaryota_unclassified	Eukaryota_unclassified	Eukaryota_unclassified	Eukaryota_unclassified	Eukaryota_unclassified	Eukaryota_unclassified
OTU_2240	0	0	0	0	0	0	0.000425993	0	0	0	0	0	0	0	0	0	0	0	0	0	0	0	0	0	0	0	0	0	0	0	0	0	0	0	Eukaryota	Eukaryota_unclassified	Eukaryota_unclassified	Eukaryota_unclassified	Eukaryota_unclassified	Eukaryota_unclassified	Eukaryota_unclassified	Eukaryota_unclassified
OTU_2293	0	0	0	0	0	0	0.000316452	0.00212805	0	0	0	0	0	0	0	0	0	0.000177939	1.97e-05	0	0	0	0	0	0	0	0	0	0	0	0	0	0	0	Eukaryota	Eukaryota_unclassified	Eukaryota_unclassified	Eukaryota_unclassified	Eukaryota_unclassified	Eukaryota_unclassified	Eukaryota_unclassified	Eukaryota_unclassified
OTU_1862	0	0	0	0	0	0	0.000511191	6.83e-05	0	0	0	0	0	0	0	0	0	0	0	0	0	0	0	0	0	0	0	0	0	0	0	0	0	0	Eukaryota	Eukaryota_unclassified	Eukaryota_unclassified	Eukaryota_unclassified	Eukaryota_unclassified	Eukaryota_unclassified	Eukaryota_unclassified	Eukaryota_unclassified
OTU_4044	0	0	0	0	0	0	0.000206911	0.000182079	0	0	0	0	0	0	0	0	0	0	0	0	0	0	0	0	0	0	0	0	0	0	0	0	0	0	Eukaryota	Eukaryota_unclassified	Eukaryota_unclassified	Eukaryota_unclassified	Eukaryota_unclassified	Eukaryota_unclassified	Eukaryota_unclassified	Eukaryota_unclassified
OTU_112	0	0	0	0	0	0	0.00648726	0.000625896	0	0	0	0	0	0	0	2.25e-05	0	0	0	0	0	0	0	0	0	0	0	0	0	0	0	0	0	0	Eukaryota	Eukaryota_unclassified	Eukaryota_unclassified	Eukaryota_unclassified	Eukaryota_unclassified	Eukaryota_unclassified	Eukaryota_unclassified	Eukaryota_unclassified
OTU_1832	2.1e-05	7.91e-05	0.000210433	0.000105591	0	0	0	0	0	0	0	0	0	0	0	4.51e-05	9.18e-05	0	0	0	0	0	0	0	0	0	0	0	0	0	0	0	0	0	Eukaryota	Eukaryota_unclassified	Eukaryota_unclassified	Eukaryota_unclassified	Eukaryota_unclassified	Eukaryota_unclassified	Eukaryota_unclassified	Eukaryota_unclassified
OTU_350	0	0	0	0	0	0	0.0028359	0.000204839	0	0	0	0	0	0	0	0	0	0	0.000118427	0	0	1.54e-05	0	0	0	0	0	0	0	0.00824753	0.000429681	1.56e-05	0	0	Eukaryota	Eukaryota_unclassified	Eukaryota_unclassified	Eukaryota_unclassified	Eukaryota_unclassified	Eukaryota_unclassified	Eukaryota_unclassified	Eukaryota_unclassified
OTU_61	0	0	0	0	0	0	0.00415039	0.00146801	0	0	0	0	0	0	0	0	0	0	0	0	0	0	0	0	0	0	0	0	0	0	0	0	0	0	Eukaryota	Eukaryota_unclassified	Eukaryota_unclassified	Eukaryota_unclassified	Eukaryota_unclassified	Eukaryota_unclassified	Eukaryota_unclassified	Eukaryota_unclassified
OTU_1808	0	0	0	0	0	0	0.000645075	4.55e-05	0	0	0	0	0	0	0	0	0	0	0	0	0	0	0	0	0	0	0	0	0	0	0	0	0	0	Eukaryota	Eukaryota_unclassified	Eukaryota_unclassified	Eukaryota_unclassified	Eukaryota_unclassified	Eukaryota_unclassified	Eukaryota_unclassified	Eukaryota_unclassified
OTU_4688	0	0	0	0	0	0	2.43e-05	1.14e-05	0	0	0	0	0	0	0	0	0	0	0	0	0	0	0	0	0	0	0	0	0	0.0133686	0	0	0	0	Eukaryota	Eukaryota_unclassified	Eukaryota_unclassified	Eukaryota_unclassified	Eukaryota_unclassified	Eukaryota_unclassified	Eukaryota_unclassified	Eukaryota_unclassified
OTU_173	0	0	0	0	0	0	0.00250727	0.000295878	0	0	0	0	0	0	0	0	0	0	0	0	0	0	0	0	0	0	0	0	0	0	0	1.56e-05	0	0	Eukaryota	Eukaryota_unclassified	Eukaryota_unclassified	Eukaryota_unclassified	Eukaryota_unclassified	Eukaryota_unclassified	Eukaryota_unclassified	Eukaryota_unclassified
OTU_3941	0	0	0	0	0	0	0.00146055	0.000125179	0	0	0	0	0	0	0	0	0	0	0	0	0	0	0	0	0	0	0	0	0	0	0	0	0	0	Eukaryota	Eukaryota_unclassified	Eukaryota_unclassified	Eukaryota_unclassified	Eukaryota_unclassified	Eukaryota_unclassified	Eukaryota_unclassified	Eukaryota_unclassified
OTU_8009	0	0	0	0	0	0	1.22e-05	0	0	0	0	0	0	0	0	0	0	0	0	0	0	0	0	0	0	0	0	0.000166237	0	2.7e-05	0	0	0	0	Eukaryota	Eukaryota_unclassified	Eukaryota_unclassified	Eukaryota_unclassified	Eukaryota_unclassified	Eukaryota_unclassified	Eukaryota_unclassified	Eukaryota_unclassified
OTU_2137	2.1e-05	5.27e-05	0.000105217	4.4e-05	0	0	0	5.69e-05	0	0	0	0	0	0	0	0	9.18e-05	0	0	0	0	0	0	0	0	0	0	0	0	0	0	0	0	0	Eukaryota	Eukaryota_unclassified	Eukaryota_unclassified	Eukaryota_unclassified	Eukaryota_unclassified	Eukaryota_unclassified	Eukaryota_unclassified	Eukaryota_unclassified
OTU_425	0	0	0	0	0	0	0.00209345	0.000910394	0	0	0	0	0	0	0	0	0	0	0	0	0	0	0	0	0	0	0	0	0	0	0	0	0	0	Eukaryota	Eukaryota_unclassified	Eukaryota_unclassified	Eukaryota_unclassified	Eukaryota_unclassified	Eukaryota_unclassified	Eukaryota_unclassified	Eukaryota_unclassified
OTU_322	0	0	0	0	0	0	0.00234905	0.000125179	0	0	0	0	0	0	0	0	0	0	0	0	0	0	0	0	0	0	0	0	0	0.000673818	0	0	0	0	Eukaryota	Eukaryota_unclassified	Eukaryota_unclassified	Eukaryota_unclassified	Eukaryota_unclassified	Eukaryota_unclassified	Eukaryota_unclassified	Eukaryota_unclassified
OTU_1660	0	0	2.1e-05	0	0	0	0.00529448	0	0	0	0	0	0	0	0	0	0	0	0	0	0	0	0	0	0	0	0	0	0	0	0	0	0	0	Eukaryota	Eukaryota_unclassified	Eukaryota_unclassified	Eukaryota_unclassified	Eukaryota_unclassified	Eukaryota_unclassified	Eukaryota_unclassified	Eukaryota_unclassified
OTU_3415	0	0	0	0	0	0	0.00049902	6.83e-05	0	0	0	0	0	0	0	0	0	0	0	0	0	0	0	0	0	0	0	0	0	0	0	0	0	0	Eukaryota	Eukaryota_unclassified	Eukaryota_unclassified	Eukaryota_unclassified	Eukaryota_unclassified	Eukaryota_unclassified	Eukaryota_unclassified	Eukaryota_unclassified
OTU_3965	0	0	0	0	0	0	2.43e-05	0	0	0	0	0	0	0	0	0	0	0	0	0	0	0	0	0	0	0	0	0	0	0	0.000958519	0	0	0	Eukaryota	Eukaryota_unclassified	Eukaryota_unclassified	Eukaryota_unclassified	Eukaryota_unclassified	Eukaryota_unclassified	Eukaryota_unclassified	Eukaryota_unclassified
OTU_7915	0	0	0	0	0	0	1.22e-05	0	0	0	0	0	0	0	0	0	0	0	0	0	0	1.54e-05	0	0	0	0	0	0	0	0.000134764	0.000760205	0	0	0	Eukaryota	Eukaryota_unclassified	Eukaryota_unclassified	Eukaryota_unclassified	Eukaryota_unclassified	Eukaryota_unclassified	Eukaryota_unclassified	Eukaryota_unclassified
OTU_4669	0	0	0	0	0	0	1.22e-05	0	0	0	0	0	0	0	0	0	0	0	0	0	0	0	0	0	0	0	0	0	0	0.000350385	0	0	0	0	Eukaryota	Eukaryota_unclassified	Eukaryota_unclassified	Eukaryota_unclassified	Eukaryota_unclassified	Eukaryota_unclassified	Eukaryota_unclassified	Eukaryota_unclassified
OTU_5016	0	0	0	0	0	0	7.3e-05	1.14e-05	0	0	0	0	0	0	0	0	0	0	0	0	0	0	0	0	0	0	0	0	0	0.0204571	0	0	0	0	Eukaryota	Eukaryota_unclassified	Eukaryota_unclassified	Eukaryota_unclassified	Eukaryota_unclassified	Eukaryota_unclassified	Eukaryota_unclassified	Eukaryota_unclassified
OTU_2788	0	0	0	0	0	0	0.000352966	0	0	0	0	0	0	0	0	0.000247966	1.53e-05	0.000177939	0	1.76e-05	0	0	0	0	0	0	0	0	0	0	0	0	0	0	Eukaryota	Eukaryota_unclassified	Eukaryota_unclassified	Eukaryota_unclassified	Eukaryota_unclassified	Eukaryota_unclassified	Eukaryota_unclassified	Eukaryota_unclassified
OTU_3681	0	2.64e-05	0	0	0	0	4.87e-05	0	0	0	0	0	0	0	0	0	0.000351849	1.78e-05	0	0	0	0	0	0	0	0	0	0	0	0	0	0	0	0	Eukaryota	Eukaryota_unclassified	Eukaryota_unclassified	Eukaryota_unclassified	Eukaryota_unclassified	Eukaryota_unclassified	Eukaryota_unclassified	Eukaryota_unclassified
OTU_8125	0	0	0	0	0	0	0	0	0	0	0	0	0	0	0	0	0	0	0	0	0	0	0	0	0	0	0	0	0	0	0.011337	0	0	0	Eukaryota	Eukaryota_unclassified	Eukaryota_unclassified	Eukaryota_unclassified	Eukaryota_unclassified	Eukaryota_unclassified	Eukaryota_unclassified	Eukaryota_unclassified
OTU_713	0	0	0	0	0	0	0.000523363	0.000409677	0	0	0	0	0	0	0	0	0	0	0	0	0	0	0	0	0	0	0	0	0	0	0	0	0	0	Eukaryota	Eukaryota_unclassified	Eukaryota_unclassified	Eukaryota_unclassified	Eukaryota_unclassified	Eukaryota_unclassified	Eukaryota_unclassified	Eukaryota_unclassified
OTU_10051	0	0	0	0	0	0	0.000425993	3.41e-05	0	0	0	0	0	0	0	0	0	0	0	0	0	0	0	0	0	0	0	0	0	0	0	0	0	0	Eukaryota	Eukaryota_unclassified	Eukaryota_unclassified	Eukaryota_unclassified	Eukaryota_unclassified	Eukaryota_unclassified	Eukaryota_unclassified	Eukaryota_unclassified
OTU_2091	0	0	0	0	0	0	0.000474678	4.55e-05	0	0	0	0	0	0	0	0	0	0	0	0	0	0	0	0	0	0	0	0	0	0	0	0	0	0	Eukaryota	Eukaryota_unclassified	Eukaryota_unclassified	Eukaryota_unclassified	Eukaryota_unclassified	Eukaryota_unclassified	Eukaryota_unclassified	Eukaryota_unclassified
OTU_5019	0	0	0	0	0	0	0	0	0	0	0	0	0	0	0	0.000360677	0	0	0	0	0	0	0	0	0	0	0	0	0	0	0	0	0	0	Eukaryota	Eukaryota_unclassified	Eukaryota_unclassified	Eukaryota_unclassified	Eukaryota_unclassified	Eukaryota_unclassified	Eukaryota_unclassified	Eukaryota_unclassified
OTU_941	0	0	0	0	0	0	0.00163094	0	0	0	0	0	0	0	0	0	0	0	0	0	0	0	0	0	0	0	0	0	0	0	0	0	0	0	Eukaryota	Eukaryota_unclassified	Eukaryota_unclassified	Eukaryota_unclassified	Eukaryota_unclassified	Eukaryota_unclassified	Eukaryota_unclassified	Eukaryota_unclassified
OTU_1681	0	0	0	0	0	0	3.65e-05	0.00208253	0	0	0	0	0	0	0	0	0	0	0	0	0	0	0	0	0	0	0	0	0	0	0	0	0	0	Eukaryota	Eukaryota_unclassified	Eukaryota_unclassified	Eukaryota_unclassified	Eukaryota_unclassified	Eukaryota_unclassified	Eukaryota_unclassified	Eukaryota_unclassified
OTU_8110	0	0	0	0	0	0	0	0	0	0	0	0	0	0	0	0	0	0	0	0	0	0	0	0	0	0	0	0.00058183	0	0	0	0	0	0	Eukaryota	Eukaryota_unclassified	Eukaryota_unclassified	Eukaryota_unclassified	Eukaryota_unclassified	Eukaryota_unclassified	Eukaryota_unclassified	Eukaryota_unclassified
OTU_3735	0	0	0	0	0	0	0.000170397	0	0	0	0	0	0	0	0	0.00029305	3.06e-05	8.9e-05	0	0	0	0	0	0	0	0	0	0	0	0	0	0	0	0	Eukaryota	Eukaryota_unclassified	Eukaryota_unclassified	Eukaryota_unclassified	Eukaryota_unclassified	Eukaryota_unclassified	Eukaryota_unclassified	Eukaryota_unclassified
OTU_1729	0	0	0	0	0	0	0.00099804	1.14e-05	0	0	0	0	0	0	0	0	0	0	0	0	0	0	0	0	0	0	0	0	0	0	0	0	0	0	Eukaryota	Eukaryota_unclassified	Eukaryota_unclassified	Eukaryota_unclassified	Eukaryota_unclassified	Eukaryota_unclassified	Eukaryota_unclassified	Eukaryota_unclassified
OTU_801	0	0	0	0	0	0	0.00643858	0.000466577	0	0	0	0	0	0	0	0	1.53e-05	0	0	0	0	0	0	0	0	0	0	0	0	0	0	0	0	0	Eukaryota	Eukaryota_unclassified	Eukaryota_unclassified	Eukaryota_unclassified	Eukaryota_unclassified	Eukaryota_unclassified	Eukaryota_unclassified	Eukaryota_unclassified
OTU_1960	0	0	0	0	0	0	0.000839815	0	0	0	0	0	0	0	0	0	0	0	0	0	0	0	0	0	0	0	0	0	0	0	0	0	0	0	Eukaryota	Eukaryota_unclassified	Eukaryota_unclassified	Eukaryota_unclassified	Eukaryota_unclassified	Eukaryota_unclassified	Eukaryota_unclassified	Eukaryota_unclassified
OTU_2227	0	0	0	0	0	0	0.000365137	0	0	0	0	0	0	0	0	0	0	0	1.97e-05	0	0	0	0	0	0	0	0	0	0	0	0	0	0	0	Eukaryota	Eukaryota_unclassified	Eukaryota_unclassified	Eukaryota_unclassified	Eukaryota_unclassified	Eukaryota_unclassified	Eukaryota_unclassified	Eukaryota_unclassified
OTU_1603	0	0	0	0	0	0	0.000584219	0	0	0	0	0	0	0	0	0	0	0	0	0	0	0	0	0	0	0	0	0	0	0	0	0	0	0	Eukaryota	Eukaryota_unclassified	Eukaryota_unclassified	Eukaryota_unclassified	Eukaryota_unclassified	Eukaryota_unclassified	Eukaryota_unclassified	Eukaryota_unclassified
OTU_2366	0	0	0	0	0	0	0	5.69e-05	0	0	0	0	0	0	1.74e-05	0	0	0	0	0	0	0.000430359	0	0.000376559	0	0	0	0	0	0	0	0	0	0	Eukaryota	Eukaryota_unclassified	Eukaryota_unclassified	Eukaryota_unclassified	Eukaryota_unclassified	Eukaryota_unclassified	Eukaryota_unclassified	Eukaryota_unclassified
OTU_541	0	0	0	0	0	0	0.00166746	2.28e-05	0	0	0	0	0	0	0	0	4.59e-05	0	0	0	0	0	0	0	0	0	0	0	0	0	0	0	0	0	Eukaryota	Eukaryota_unclassified	Eukaryota_unclassified	Eukaryota_unclassified	Eukaryota_unclassified	Eukaryota_unclassified	Eukaryota_unclassified	Eukaryota_unclassified
OTU_1256	0	0	4.21e-05	0	0	0	0	0.00118351	0	0	0	0	0	1.18e-05	1.74e-05	0	0	0	0	0	1.45e-05	0	0	0	3.07e-05	0	4.07e-05	0	0	0	0	0	0	0	Eukaryota	Eukaryota_unclassified	Eukaryota_unclassified	Eukaryota_unclassified	Eukaryota_unclassified	Eukaryota_unclassified	Eukaryota_unclassified	Eukaryota_unclassified
OTU_800	0	0	0	0	0	0	0	0	0	0	0	0	0	0	0.0061418	0	0	0	0	0	0	0	0	0	0	0	0	0	0	0	0	0	0	0	Eukaryota	Eukaryota_unclassified	Eukaryota_unclassified	Eukaryota_unclassified	Eukaryota_unclassified	Eukaryota_unclassified	Eukaryota_unclassified	Eukaryota_unclassified
OTU_4653	0	0	0	1.76e-05	5.43e-05	9.55e-05	0	0	0	0	0	0	0	0	0	0	0	0	0	0	0	0	6.82e-05	2.35e-05	3.07e-05	0.000743733	4.07e-05	0	3.51e-05	0	0	0	0	2.95e-05	Eukaryota	Eukaryota_unclassified	Eukaryota_unclassified	Eukaryota_unclassified	Eukaryota_unclassified	Eukaryota_unclassified	Eukaryota_unclassified	Eukaryota_unclassified
OTU_1043	0	0	0	8.8e-06	0	0	0	0	0	0	0	0	0	0	0	0.000405762	0.00013768	0	0	0	0	0	0	0	0	0	0	0	0	0	0	0	0	0	Eukaryota	Eukaryota_unclassified	Eukaryota_unclassified	Eukaryota_unclassified	Eukaryota_unclassified	Eukaryota_unclassified	Eukaryota_unclassified	Eukaryota_unclassified
OTU_1316	0	2.64e-05	0	0	5.43e-05	0	0	0	0	0	0	0	0	0	0	0	0	0	0	0	0	0	0	0	0	0	0	0	0	0	0	0.00300427	0	0	Eukaryota	Eukaryota_unclassified	Eukaryota_unclassified	Eukaryota_unclassified	Eukaryota_unclassified	Eukaryota_unclassified	Eukaryota_unclassified	Eukaryota_unclassified
OTU_470	0	0	0	0	0	0	0	0.00133145	0	0	1.44e-05	0	1.4e-05	0	1.74e-05	0	0	0	0	0	0	0.000261289	0	2.35e-05	0	0	0.000407017	0	0	0	0	0	0	0	Eukaryota	Eukaryota_unclassified	Eukaryota_unclassified	Eukaryota_unclassified	Eukaryota_unclassified	Eukaryota_unclassified	Eukaryota_unclassified	Eukaryota_unclassified
OTU_599	0	0	0	0	0	0	0.000559876	0.00172975	0	0	0	0	0	0	0	0	0	0	0	0	1.45e-05	0	1.36e-05	0	0	1.46e-05	0	0	3.51e-05	2.7e-05	0	0	0	0	Eukaryota	Eukaryota_unclassified	Eukaryota_unclassified	Eukaryota_unclassified	Eukaryota_unclassified	Eukaryota_unclassified	Eukaryota_unclassified	Eukaryota_unclassified
OTU_17798	0	0	0	0	0	0.00036619	0	0	0	0	0	0	0	0	0	0	0	0	0	0	0	0	0	0	0	0	0	0	0	0	0	0	0	0	Eukaryota	Eukaryota_unclassified	Eukaryota_unclassified	Eukaryota_unclassified	Eukaryota_unclassified	Eukaryota_unclassified	Eukaryota_unclassified	Eukaryota_unclassified
OTU_6965	0	0.000316339	2.1e-05	3.52e-05	0.000244479	0	0	0	1.36e-05	0	0	0	0	0	0	0	0	0	0	0	0	1.54e-05	0	0	0	0	0	0	0	0	0	0	0	0	Eukaryota	Eukaryota_unclassified	Eukaryota_unclassified	Eukaryota_unclassified	Eukaryota_unclassified	Eukaryota_unclassified	Eukaryota_unclassified	Eukaryota_unclassified
OTU_4171	0	0	0	8.8e-06	0	1.59e-05	0	0	0.000136316	0.000511834	0	5.2e-05	0	0.000342034	0.000173989	0.000157796	1.53e-05	0	5.92e-05	0.000299951	0.00161159	0.00476469	0.00352113	0.0229466	0.00440833	0.00313534	0.0105417	0.00590142	0.0042157	0	3.31e-05	0.00733856	0.00409806	0.01821	Eukaryota	Eukaryota_unclassified	Eukaryota_unclassified	Eukaryota_unclassified	Eukaryota_unclassified	Eukaryota_unclassified	Eukaryota_unclassified	Eukaryota_unclassified
OTU_1068	0	0	0	0.000202383	0	0	0.00584219	3.41e-05	0	0	0	0	0	0	0	0	0	0	0	0	0	0	0	0	0	0	0	0	0	0	0	0	0	0	Eukaryota	Eukaryota_unclassified	Eukaryota_unclassified	Eukaryota_unclassified	Eukaryota_unclassified	Eukaryota_unclassified	Eukaryota_unclassified	Eukaryota_unclassified
OTU_2057	0	0	0	0	0	0	0	0	0	0	0	0	0	0	0	0.000157796	0.000458933	0	0	0	0	0	0	0	0	0	0	0	0	0	0	0	0	0	Eukaryota	Eukaryota_unclassified	Eukaryota_unclassified	Eukaryota_unclassified	Eukaryota_unclassified	Eukaryota_unclassified	Eukaryota_unclassified	Eukaryota_unclassified
OTU_4686	2.1e-05	5.27e-05	6.31e-05	7.92e-05	0	0	0.000109541	0	0	0	0	0	0	0	0	0	3.06e-05	3.56e-05	1.97e-05	1.76e-05	0	0	0	0	0	0	0	0	0	0	0	0	0	0	Eukaryota	Eukaryota_unclassified	Eukaryota_unclassified	Eukaryota_unclassified	Eukaryota_unclassified	Eukaryota_unclassified	Eukaryota_unclassified	Eukaryota_unclassified
OTU_5569	0	0	0	0	0	0	0	0	0.000109053	0	0	0	0	0	0	0	0.000122382	0	0.000453971	0	0	0	0	0	0	0	0	0	0	0	0	0	0	0	Eukaryota	Eukaryota_unclassified	Eukaryota_unclassified	Eukaryota_unclassified	Eukaryota_unclassified	Eukaryota_unclassified	Eukaryota_unclassified	Eukaryota_unclassified
OTU_3553	0	0	0	0	0	0	0	0	0	0	0	0	0	0	0	0	0	0	0	0.000123509	1.45e-05	0.000338139	0.000423081	0.00018828	0.000921602	4.37e-05	0.000101754	0	0.000702617	0	0	0	2.97e-05	5.9e-05	Eukaryota	Eukaryota_unclassified	Eukaryota_unclassified	Eukaryota_unclassified	Eukaryota_unclassified	Eukaryota_unclassified	Eukaryota_unclassified	Eukaryota_unclassified
OTU_4297	2.1e-05	0.000606316	0.000105217	4.4e-05	0.00116807	0	0	0	0	0	0	0	0	0	0	0	0	0	0	0	0	0	0	0	0	0	0	0	0	0	0	0	0	0	Eukaryota	Eukaryota_unclassified	Eukaryota_unclassified	Eukaryota_unclassified	Eukaryota_unclassified	Eukaryota_unclassified	Eukaryota_unclassified	Eukaryota_unclassified
OTU_2337	0	5.27e-05	0	1.76e-05	0	0	0	0	0	0	0	0	0	0	0	0	0	0	0	0.000405816	4.36e-05	0.000922197	0.00177421	0.000470699	0.00241153	0.000131247	6.11e-05	0	0.00158089	0	0	1.56e-05	5.94e-05	0.000162194	Eukaryota	Eukaryota_unclassified	Eukaryota_unclassified	Eukaryota_unclassified	Eukaryota_unclassified	Eukaryota_unclassified	Eukaryota_unclassified	Eukaryota_unclassified
OTU_3931	0	0	0	0	0	0	0	4.55e-05	0	0	0	0	0	1.18e-05	0	0	0	0.000462642	0	0	0	0	0	4.71e-05	0	0	0	0	0	0	0	0	0	0	Eukaryota	Eukaryota_unclassified	Eukaryota_unclassified	Eukaryota_unclassified	Eukaryota_unclassified	Eukaryota_unclassified	Eukaryota_unclassified	Eukaryota_unclassified
OTU_2646	0	0	0	0	0	0	2.43e-05	7.97e-05	0	0	0	0	0	0	0	0	0	0	0	0	0	0	0	0	0	0	0	0	0	0	0.0020823	0	0	0	Eukaryota	Eukaryota_unclassified	Eukaryota_unclassified	Eukaryota_unclassified	Eukaryota_unclassified	Eukaryota_unclassified	Eukaryota_unclassified	Eukaryota_unclassified
OTU_5478	0	0.000659039	0.00025252	5.28e-05	0	0	0	0	0	0	0	0	0	0	0	0	0	0	0	0	0	0	0	0	0	0	0	0	0	0	0	0	0	0	Eukaryota	Eukaryota_unclassified	Eukaryota_unclassified	Eukaryota_unclassified	Eukaryota_unclassified	Eukaryota_unclassified	Eukaryota_unclassified	Eukaryota_unclassified
OTU_4452	0	0.000263616	6.31e-05	4.4e-05	0	0	0	0	0	0	0	0	0	0	0	0	0	0	0	0	0	1.54e-05	1.36e-05	0	0	0	0	0	0	0	0	0	0	0	Eukaryota	Eukaryota_unclassified	Eukaryota_unclassified	Eukaryota_unclassified	Eukaryota_unclassified	Eukaryota_unclassified	Eukaryota_unclassified	Eukaryota_unclassified
OTU_4084	0	0	0	0	0	0	0	0	0	0	0	0	0	0	0	0	0	0	0	0	0	3.07e-05	0.00024566	4.71e-05	0.000307201	4.37e-05	0.000162807	0	0.000526963	0	0	0	1.48e-05	4.42e-05	Eukaryota	Eukaryota_unclassified	Eukaryota_unclassified	Eukaryota_unclassified	Eukaryota_unclassified	Eukaryota_unclassified	Eukaryota_unclassified	Eukaryota_unclassified
OTU_852	0	0	0	0	0	0	1.22e-05	0.00134283	1.36e-05	1.76e-05	1.44e-05	0	0	0	5.22e-05	0	0	0	0	0	0	0	0	0	0	0	0	0	0	0	0	0	0	0	Eukaryota	Eukaryota_unclassified	Eukaryota_unclassified	Eukaryota_unclassified	Eukaryota_unclassified	Eukaryota_unclassified	Eukaryota_unclassified	Eukaryota_unclassified
OTU_3314	0	0	0	8.8e-06	0	0	0	0	0	0	0	0	0	0	0	0	0	0	0	0.000158797	0	0.00010759	0.000450377	4.71e-05	0.000322561	7.29e-05	4.07e-05	0	0.000526963	0	0	0	0	8.85e-05	Eukaryota	Eukaryota_unclassified	Eukaryota_unclassified	Eukaryota_unclassified	Eukaryota_unclassified	Eukaryota_unclassified	Eukaryota_unclassified	Eukaryota_unclassified
OTU_1683	0	0	0	8.8e-06	0	1.59e-05	0	0	0	0	0	0	0	0	0	0	0	0	0	0.000494036	4.36e-05	0.00012296	0.000518616	2.35e-05	0.000460801	5.83e-05	0.000223859	0	0.00122958	0	0	1.56e-05	5.94e-05	0.000309643	Eukaryota	Eukaryota_unclassified	Eukaryota_unclassified	Eukaryota_unclassified	Eukaryota_unclassified	Eukaryota_unclassified	Eukaryota_unclassified	Eukaryota_unclassified
OTU_2845	0	0	0	0	0	0	0	0	0	0	0	0	0	0	0	0	0	0	0	0	0	0	0	0	1.54e-05	0	0	0	0	0	0	0	0	0.000383368	Eukaryota	Eukaryota_unclassified	Eukaryota_unclassified	Eukaryota_unclassified	Eukaryota_unclassified	Eukaryota_unclassified	Eukaryota_unclassified	Eukaryota_unclassified
OTU_4270	0	0	0	0	0	0	0	0	0	0	0	0	0	0	0	0	0	0	0	0	0	7.68e-05	0.000163773	0.000117675	0.000614402	0	8.14e-05	0	0.00119445	0	0	0	1.48e-05	1.47e-05	Eukaryota	Eukaryota_unclassified	Eukaryota_unclassified	Eukaryota_unclassified	Eukaryota_unclassified	Eukaryota_unclassified	Eukaryota_unclassified	Eukaryota_unclassified
OTU_1482	0.00231092	0	0	0	0	0	0	0	0	0	0	0	0	0	0	0	0	0	0	0	0	0	0	0	0	0	0	0	0	0	0	0	0	0	Eukaryota	Eukaryota_unclassified	Eukaryota_unclassified	Eukaryota_unclassified	Eukaryota_unclassified	Eukaryota_unclassified	Eukaryota_unclassified	Eukaryota_unclassified
OTU_5161	0	0.000579955	0.000357737	0.000175985	0.000597615	3.18e-05	0	0	2.73e-05	0	0	0	0	0	1.74e-05	0	0	0	0	0	0	0	0	0	0	0	4.07e-05	0	0	0	0	1.56e-05	0	0	Eukaryota	Eukaryota_unclassified	Eukaryota_unclassified	Eukaryota_unclassified	Eukaryota_unclassified	Eukaryota_unclassified	Eukaryota_unclassified	Eukaryota_unclassified
OTU_1779	0	0	0	0	0	0	0	0	0	0	0	0	0	0	0	0	0	0	0	0	0	0	0	0	0	0	0	0	0	0	0	0	0	0.00175464	Eukaryota	Eukaryota_unclassified	Eukaryota_unclassified	Eukaryota_unclassified	Eukaryota_unclassified	Eukaryota_unclassified	Eukaryota_unclassified	Eukaryota_unclassified
OTU_6087	0	0.000369062	0.000147303	7.04e-05	0.000244479	0	0	0	0	0	0	0	0	0	0	0	0	0	0	0	0	0	0	0	0	0	0	0	0	0	0	0	0	0	Eukaryota	Eukaryota_unclassified	Eukaryota_unclassified	Eukaryota_unclassified	Eukaryota_unclassified	Eukaryota_unclassified	Eukaryota_unclassified	Eukaryota_unclassified
OTU_1939	0	0	0	0	0	0	0.00019474	0	0	0	0	0	0	0	0	0	0.000183573	0	0	0	0	0	0	0	0	0	0	0	0	0	0	0	0	0	Eukaryota	Eukaryota_unclassified	Eukaryota_unclassified	Eukaryota_unclassified	Eukaryota_unclassified	Eukaryota_unclassified	Eukaryota_unclassified	Eukaryota_unclassified
OTU_138	0.000483193	0.000237254	0.000526083	0.000906323	0	0	0	0	0	0	0	0	0	0	0	0	0	0	0	0	0	0	0	0	0	0	0	0	0	0	0	0	0	0	Eukaryota	Eukaryota_unclassified	Eukaryota_unclassified	Eukaryota_unclassified	Eukaryota_unclassified	Eukaryota_unclassified	Eukaryota_unclassified	Eukaryota_unclassified
OTU_6289	0.000336134	5.27e-05	2.1e-05	2.64e-05	0	0	1.22e-05	0.000136559	0	0	0	0	0	0	0	0.000202881	0.000673102	0	0	0	0	0	0	0	0	0	0	0	0	0	0	0	0	0	Eukaryota	Eukaryota_unclassified	Eukaryota_unclassified	Eukaryota_unclassified	Eukaryota_unclassified	Eukaryota_unclassified	Eukaryota_unclassified	Eukaryota_unclassified
OTU_13169	0	2.64e-05	0	8.8e-06	5.43e-05	3.18e-05	0	0	1.36e-05	0	0	0	0	0	0	0	0	0	0	0	0	0	1.36e-05	0	1.54e-05	7.29e-05	4.07e-05	0	3.51e-05	0	0	0	1.48e-05	0	Eukaryota	Eukaryota_unclassified	Eukaryota_unclassified	Eukaryota_unclassified	Eukaryota_unclassified	Eukaryota_unclassified	Eukaryota_unclassified	Eukaryota_unclassified
OTU_2257	0	0	0	0	0	0	0	0.000216219	1.36e-05	0	0	0	2.79e-05	0	0	0	0	0	0	0	0	0.000599428	0	0	0	0	0.000101754	0	0	0	0	0	0	0	Eukaryota	Eukaryota_unclassified	Eukaryota_unclassified	Eukaryota_unclassified	Eukaryota_unclassified	Eukaryota_unclassified	Eukaryota_unclassified	Eukaryota_unclassified
OTU_362	0	0	0	0	0	0	0.00166746	0.000637276	0	0	0	0	0	0	0	0	0	0	0	0	0	0	0	0	0	0	0	0	0	0.046736	0	0	0	0	Eukaryota	Eukaryota_unclassified	Eukaryota_unclassified	Eukaryota_unclassified	Eukaryota_unclassified	Eukaryota_unclassified	Eukaryota_unclassified	Eukaryota_unclassified
OTU_3929	0	0	0	0	0	0	0.000121712	0.000819355	0	0	0	0	0	0	0	0	0	0	0	0	0	0	0	0	0	0	0	0	0	0	0	0	0	0	Eukaryota	Eukaryota_unclassified	Eukaryota_unclassified	Eukaryota_unclassified	Eukaryota_unclassified	Eukaryota_unclassified	Eukaryota_unclassified	Eukaryota_unclassified
OTU_2869	0	0	0	0	0	0	0	0.000694176	0	1.76e-05	0	0	0	0	0	0	0	0	0	0	0	0	0	0	0	0	0	0	0	0	0	0	0	0	Eukaryota	Eukaryota_unclassified	Eukaryota_unclassified	Eukaryota_unclassified	Eukaryota_unclassified	Eukaryota_unclassified	Eukaryota_unclassified	Eukaryota_unclassified
OTU_7363	0	0	0	0	0	0	0.00019474	0.000182079	0	0	0	0	0	0	0	0	0	0	0	0	0	0	0	0	0	0	0	0	0	0	0	0	0	0	Eukaryota	Eukaryota_unclassified	Eukaryota_unclassified	Eukaryota_unclassified	Eukaryota_unclassified	Eukaryota_unclassified	Eukaryota_unclassified	Eukaryota_unclassified
OTU_2744	0	0	0	0	0	0	6.09e-05	0.000534857	0	0	0	0	0	0	0	0	0	0	0	0	0	0	0	0	0	0	0	0	0	0	0	0	0	0	Eukaryota	Eukaryota_unclassified	Eukaryota_unclassified	Eukaryota_unclassified	Eukaryota_unclassified	Eukaryota_unclassified	Eukaryota_unclassified	Eukaryota_unclassified
OTU_2834	0	0	0	0	0	0	6.09e-05	0.000534857	0	0	0	0	0	0	0	0	0	0	0	0	0	0	0	0	0	0	0	0	0	0	0	0	0	0	Eukaryota	Eukaryota_unclassified	Eukaryota_unclassified	Eukaryota_unclassified	Eukaryota_unclassified	Eukaryota_unclassified	Eukaryota_unclassified	Eukaryota_unclassified
OTU_4015	0	0	0	0	0	0	0	0.000568997	0	0	0	0	0	1.18e-05	0	0	0	0	0	0	0	0	0	0	0	0	0	0	0	0	0	0	0	0	Eukaryota	Eukaryota_unclassified	Eukaryota_unclassified	Eukaryota_unclassified	Eukaryota_unclassified	Eukaryota_unclassified	Eukaryota_unclassified	Eukaryota_unclassified
OTU_2806	0	0	0	0	0	0	0	5.69e-05	0	0	0	1.73e-05	0	0	1.74e-05	0	0	0	0	0	0	6.15e-05	0	0	0	0	0	0.00203641	0	0	0	0	0	0	Eukaryota	Eukaryota_unclassified	Eukaryota_unclassified	Eukaryota_unclassified	Eukaryota_unclassified	Eukaryota_unclassified	Eukaryota_unclassified	Eukaryota_unclassified
OTU_3138	0	0	0	0	0	0	0	0.000102419	0	0	0	0	0	5.9e-05	0	0	0	0	0	0	1.45e-05	1.54e-05	0	0	0	0	0	0	0	0	0.00165262	0	0	0	Eukaryota	Eukaryota_unclassified	Eukaryota_unclassified	Eukaryota_unclassified	Eukaryota_unclassified	Eukaryota_unclassified	Eukaryota_unclassified	Eukaryota_unclassified
OTU_897	0	0	0	0	0	0	0.000109541	0.000955914	0	0	0	0	0	0	0	0	0	0	0	0	0	0	0	0	0	0	0	0	0	0	0	0	0	0	Eukaryota	Eukaryota_unclassified	Eukaryota_unclassified	Eukaryota_unclassified	Eukaryota_unclassified	Eukaryota_unclassified	Eukaryota_unclassified	Eukaryota_unclassified
OTU_1283	0	0	0	0	0	0	0.000170397	0.000614516	0	0	0	0	0	0	0	0	0	0	0	0	0	0	0	0	0	0	0	0	0	0	0	0	0	0	Eukaryota	Eukaryota_unclassified	Eukaryota_unclassified	Eukaryota_unclassified	Eukaryota_unclassified	Eukaryota_unclassified	Eukaryota_unclassified	Eukaryota_unclassified
OTU_5356	0	0	0	0	0	0	0.00040165	9.1e-05	0	0	0	0	0	0	0	0	0	0	0	0	0	0	0	0	0	0	0	0	0	0	0	0	0	0	Eukaryota	Eukaryota_unclassified	Eukaryota_unclassified	Eukaryota_unclassified	Eukaryota_unclassified	Eukaryota_unclassified	Eukaryota_unclassified	Eukaryota_unclassified
OTU_2474	0	0	0	0	0	0	0.000681589	0.000216219	0	0	0	0	0	0	0	0	0	0	0	0	0	0	0	0	0	0	0	0	0	0	0	0	0	0	Eukaryota	Eukaryota_unclassified	Eukaryota_unclassified	Eukaryota_unclassified	Eukaryota_unclassified	Eukaryota_unclassified	Eukaryota_unclassified	Eukaryota_unclassified
OTU_3472	0	0	0	0	0	0	0.000279938	0.000386918	0	0	1.44e-05	0	0	0	0	0	0	0	0	0	0	0	0	0	0	0	0	0	0	0	0	0	0	0	Eukaryota	Eukaryota_unclassified	Eukaryota_unclassified	Eukaryota_unclassified	Eukaryota_unclassified	Eukaryota_unclassified	Eukaryota_unclassified	Eukaryota_unclassified
OTU_539	0	0	0	0	0	0	0.00104673	0.000318638	0	0	0	0	0	0	0	0	0	0	0	0	0	0	0	0	0	0	0	0	0	0.000161716	0	0	0	0	Eukaryota	Eukaryota_unclassified	Eukaryota_unclassified	Eukaryota_unclassified	Eukaryota_unclassified	Eukaryota_unclassified	Eukaryota_unclassified	Eukaryota_unclassified
OTU_3601	0	0	0	0	0	0	0	1.14e-05	0	0	0	0	0	0	0	0.000202881	7.65e-05	1.78e-05	3.95e-05	0	7.26e-05	1.54e-05	2.73e-05	0	0	0	0	0	0	0	0	0	0	0	Eukaryota	Eukaryota_unclassified	Eukaryota_unclassified	Eukaryota_unclassified	Eukaryota_unclassified	Eukaryota_unclassified	Eukaryota_unclassified	Eukaryota_unclassified
OTU_1702	0	0	0	0	0	0	0.000912842	0.000216219	0	0	0	0	0	0	0	0	0	0	0	0	0	0	0	0	0	0	0	0	0	0	0	1.56e-05	0	0	Eukaryota	Eukaryota_unclassified	Eukaryota_unclassified	Eukaryota_unclassified	Eukaryota_unclassified	Eukaryota_unclassified	Eukaryota_unclassified	Eukaryota_unclassified
OTU_2058	0	0	0	0	0	0	9.74e-05	0.000170699	0	0	0	0	0	0	0	0	0.000152978	0.000124557	0	0	0.00013067	0	2.73e-05	0	0	0	0	0	0	0	0	0	0	0	Eukaryota	Eukaryota_unclassified	Eukaryota_unclassified	Eukaryota_unclassified	Eukaryota_unclassified	Eukaryota_unclassified	Eukaryota_unclassified	Eukaryota_unclassified
OTU_7101	0	0	0	0	0	0	0	0.000500717	0	1.76e-05	0	0	0	0	0	0	0	0	0	0	0	0	0	0	0	0	0	0	0	0	0	0	0	0	Eukaryota	Eukaryota_unclassified	Eukaryota_unclassified	Eukaryota_unclassified	Eukaryota_unclassified	Eukaryota_unclassified	Eukaryota_unclassified	Eukaryota_unclassified
OTU_3485	0	0	0	0	0	0	0.00185003	0.000864875	0	0	0	0	0	0	0	0	0	0	0	0	0	0	0	0	0	0	0	0	0	0.000161716	0	0	0	0	Eukaryota	Eukaryota_unclassified	Eukaryota_unclassified	Eukaryota_unclassified	Eukaryota_unclassified	Eukaryota_unclassified	Eukaryota_unclassified	Eukaryota_unclassified
OTU_2369	0	0	0	0	0	0	0.000608561	0.000273118	0	0	1.44e-05	0	0	0	0	0	0	0	0	0	0	0	0	0	0	0	0	0	0	0	0	0	1.48e-05	0	Eukaryota	Eukaryota_unclassified	Eukaryota_unclassified	Eukaryota_unclassified	Eukaryota_unclassified	Eukaryota_unclassified	Eukaryota_unclassified	Eukaryota_unclassified
OTU_4078	0	0	2.1e-05	0	0	0	9.74e-05	0.000352778	0	0	0	0	0	0	0	2.25e-05	0	0	0	0	0	0	0	0	0	0	0	0	0	0	0	1.56e-05	0	0	Eukaryota	Eukaryota_unclassified	Eukaryota_unclassified	Eukaryota_unclassified	Eukaryota_unclassified	Eukaryota_unclassified	Eukaryota_unclassified	Eukaryota_unclassified
OTU_3162	0	0	0	0	0	0	7.3e-05	1.14e-05	0	0	0	0	0	0	0	0	0	0	0	0	0	0	0	0	0	0	0	0	0	0	0.000991572	0	0	0	Eukaryota	Eukaryota_unclassified	Eukaryota_unclassified	Eukaryota_unclassified	Eukaryota_unclassified	Eukaryota_unclassified	Eukaryota_unclassified	Eukaryota_unclassified
OTU_4118	0	0	0	0	0	0	0.000304281	6.83e-05	0	0	0	0	0	0	0	0	0	0	0	0	0	0	0	0	0	0	0	0	0	0	0	0	0	0	Eukaryota	Eukaryota_unclassified	Eukaryota_unclassified	Eukaryota_unclassified	Eukaryota_unclassified	Eukaryota_unclassified	Eukaryota_unclassified	Eukaryota_unclassified
OTU_4303	0	0	0	0	0	0	0.000121712	0.000398298	0	0	0	0	0	0	0	0	0	0	0	0	0	0	0	0	0	0	0	0	0	0	0	0	0	0	Eukaryota	Eukaryota_unclassified	Eukaryota_unclassified	Eukaryota_unclassified	Eukaryota_unclassified	Eukaryota_unclassified	Eukaryota_unclassified	Eukaryota_unclassified
OTU_2538	0	0	0	0	0	0	0.000474678	0.000125179	0	0	0	0	0	0	0	0	0	0	0	0	0	0	0	0	0	0	0	0	0	0	0	0	0	0	Eukaryota	Eukaryota_unclassified	Eukaryota_unclassified	Eukaryota_unclassified	Eukaryota_unclassified	Eukaryota_unclassified	Eukaryota_unclassified	Eukaryota_unclassified
OTU_7448	0	0	0	0	0	0	0.000438164	4.55e-05	0	0	0	0	0	0	0	0	0	0	0	0	0	0	0	0	0	0	0	0	0	0	0	0	0	0	Eukaryota	Eukaryota_unclassified	Eukaryota_unclassified	Eukaryota_unclassified	Eukaryota_unclassified	Eukaryota_unclassified	Eukaryota_unclassified	Eukaryota_unclassified
OTU_9551	0	0	0	0	0	0	0.000413822	6.83e-05	0	0	0	0	0	0	0	0	0	0	0	0	0	0	0	0	0	0	0	0	0	0	0	0	0	0	Eukaryota	Eukaryota_unclassified	Eukaryota_unclassified	Eukaryota_unclassified	Eukaryota_unclassified	Eukaryota_unclassified	Eukaryota_unclassified	Eukaryota_unclassified
OTU_2023	0	0	0	0	0	0	2.43e-05	3.41e-05	0	0	0	0	0	0	0	0	0	0	0	0	0	0	0	0	0	0	0	0	0	0	0.00198314	0	0	0.000265408	Eukaryota	Eukaryota_unclassified	Eukaryota_unclassified	Eukaryota_unclassified	Eukaryota_unclassified	Eukaryota_unclassified	Eukaryota_unclassified	Eukaryota_unclassified
OTU_1436	0	0	0	8.8e-06	0	0	0.00449118	3.41e-05	0	0	0	0	0	0	0.000347977	0	0	7.12e-05	0.000473709	0.000105865	0.000232302	0.000537948	0.000163773	0.00317722	7.68e-05	4.37e-05	0.000284912	0.00058183	0.000105393	0	0.00704016	0.00591466	8.91e-05	0	Eukaryota	Eukaryota_unclassified	Eukaryota_unclassified	Eukaryota_unclassified	Eukaryota_unclassified	Eukaryota_unclassified	Eukaryota_unclassified	Eukaryota_unclassified
OTU_710	0	0	0	0	0	0	0.000304281	9.1e-05	0	0	0	0	0	0	0	0	0	0	0	0	0	0	0	0	0	0	0	0	0	0	0	0	0	0	Eukaryota	Eukaryota_unclassified	Eukaryota_unclassified	Eukaryota_unclassified	Eukaryota_unclassified	Eukaryota_unclassified	Eukaryota_unclassified	Eukaryota_unclassified
OTU_3401	0	0	0	0	0	0	0.000182568	4.55e-05	0	0	0	0	0	0	0	0	0	0	0	0	0	0	0	0	0	0	0	0	0	0	0	0	0	0.000294898	Eukaryota	Eukaryota_unclassified	Eukaryota_unclassified	Eukaryota_unclassified	Eukaryota_unclassified	Eukaryota_unclassified	Eukaryota_unclassified	Eukaryota_unclassified
OTU_3439	0	0	0	0	0	0	0	3.41e-05	0	0	0	0	0	0	0	0	0	1.78e-05	3.95e-05	8.82e-05	0.000188745	0	1.36e-05	0	0	0	0	0	0.000105393	0	0	0	0	0	Eukaryota	Eukaryota_unclassified	Eukaryota_unclassified	Eukaryota_unclassified	Eukaryota_unclassified	Eukaryota_unclassified	Eukaryota_unclassified	Eukaryota_unclassified
OTU_4149	0	0	0	0	0	0	0	2.28e-05	0	0	0	0	0	0	0	0	0	0	0	0	0	0	0	0	0	0	0	0	0	0	0	0	0	0.000339133	Eukaryota	Eukaryota_unclassified	Eukaryota_unclassified	Eukaryota_unclassified	Eukaryota_unclassified	Eukaryota_unclassified	Eukaryota_unclassified	Eukaryota_unclassified
OTU_2388	0	0	0	0	0	0	0.000608561	9.1e-05	0	0	0	0	0	0	0	0	0	3.56e-05	0	0	1.45e-05	0	0	0	0	0	0	0	0	0	0	0	0	0	Eukaryota	Eukaryota_unclassified	Eukaryota_unclassified	Eukaryota_unclassified	Eukaryota_unclassified	Eukaryota_unclassified	Eukaryota_unclassified	Eukaryota_unclassified
OTU_10603	0	0	0	0	0	0	0.000340794	2.28e-05	0	0	0	0	0	0	0	0	0	0	0	0	0	0	0	0	0	0	0	0	0	2.7e-05	0	0	0	0	Eukaryota	Eukaryota_unclassified	Eukaryota_unclassified	Eukaryota_unclassified	Eukaryota_unclassified	Eukaryota_unclassified	Eukaryota_unclassified	Eukaryota_unclassified
OTU_2067	0	0	0	0	0	0	0	3.41e-05	0	0	0	0	0	0	0	0	0	0	0	0	0	0.000445729	2.73e-05	0	0	0	0	0	0	0	0.0123946	0.00686914	0	0.000619286	Eukaryota	Eukaryota_unclassified	Eukaryota_unclassified	Eukaryota_unclassified	Eukaryota_unclassified	Eukaryota_unclassified	Eukaryota_unclassified	Eukaryota_unclassified
OTU_3988	0	0	0	0	0	0	0	1.14e-05	0	0	0	0	0	0	0	0	0	0	0	0	0	0	0	0	0	0	8.14e-05	0	0	0	0	0	0	0	Eukaryota	Eukaryota_unclassified	Eukaryota_unclassified	Eukaryota_unclassified	Eukaryota_unclassified	Eukaryota_unclassified	Eukaryota_unclassified	Eukaryota_unclassified
OTU_4057	0	0	0	0	0	0	0.000121712	2.28e-05	0	0	0	0	0	0	0	0	0	1.78e-05	0	0	0	0	0	0	0	0	2.04e-05	0	0	0	0	0	0	0	Eukaryota	Eukaryota_unclassified	Eukaryota_unclassified	Eukaryota_unclassified	Eukaryota_unclassified	Eukaryota_unclassified	Eukaryota_unclassified	Eukaryota_unclassified
OTU_4860	0	0	0	0	0	0	2.43e-05	3.41e-05	0	0	0	0	0	0	0	0	0	0	0	0	0	0	0	0	0	0	0	0.000457152	0	8.09e-05	0	0	0	0	Eukaryota	Eukaryota_unclassified	Eukaryota_unclassified	Eukaryota_unclassified	Eukaryota_unclassified	Eukaryota_unclassified	Eukaryota_unclassified	Eukaryota_unclassified
OTU_3120	0	0	0	0.00012319	0	0	0	4.55e-05	0	0	0	0	0	0	0	0	4.59e-05	0	3.95e-05	1.76e-05	0.000145188	0	1.36e-05	0	0	1.46e-05	0	0	0	0	0	0	0	0	Eukaryota	Eukaryota_unclassified	Eukaryota_unclassified	Eukaryota_unclassified	Eukaryota_unclassified	Eukaryota_unclassified	Eukaryota_unclassified	Eukaryota_unclassified
OTU_5195	0	0	0	0	0	0	0	1.14e-05	0	0	0	0	0	0	0	0	0	0	0.000157903	0.000441104	5.81e-05	4.61e-05	9.55e-05	0	3.07e-05	0	2.04e-05	0	0.000175654	0	0	0	0	5.9e-05	Eukaryota	Eukaryota_unclassified	Eukaryota_unclassified	Eukaryota_unclassified	Eukaryota_unclassified	Eukaryota_unclassified	Eukaryota_unclassified	Eukaryota_unclassified
OTU_4167	0	0	0	0	0	0	0	1.14e-05	0	0	0	0	0	0	0	0	0	5.34e-05	0	0	0	3.07e-05	0	0	0	0	0	8.31e-05	0	0	0.00013221	0	0	0	Eukaryota	Eukaryota_unclassified	Eukaryota_unclassified	Eukaryota_unclassified	Eukaryota_unclassified	Eukaryota_unclassified	Eukaryota_unclassified	Eukaryota_unclassified
OTU_5033	0	0	0	0	0	0	0.000425993	2.28e-05	0	0	0	0	0	0	0	0	0	0	0	0	0	0	0	0	0	0	0	0	0	0	0	0	0	0	Eukaryota	Eukaryota_unclassified	Eukaryota_unclassified	Eukaryota_unclassified	Eukaryota_unclassified	Eukaryota_unclassified	Eukaryota_unclassified	Eukaryota_unclassified
OTU_8173	0	0	0	0	0	0	3.65e-05	3.41e-05	0	0	0	0	0	0	0	0	0	0	0	0	0	0	0	0	0	0	0	0	0	0.0140154	0	0	0	0	Eukaryota	Eukaryota_unclassified	Eukaryota_unclassified	Eukaryota_unclassified	Eukaryota_unclassified	Eukaryota_unclassified	Eukaryota_unclassified	Eukaryota_unclassified
OTU_7769	0	0	0	0	0	1.59e-05	0	1.14e-05	0	0	1.44e-05	0	0	0	0	0	0	0	0	3.53e-05	1.45e-05	0	0.00012283	2.35e-05	0.00018432	2.92e-05	2.04e-05	0	0.000351309	0	0	0	0	0.000265408	Eukaryota	Eukaryota_unclassified	Eukaryota_unclassified	Eukaryota_unclassified	Eukaryota_unclassified	Eukaryota_unclassified	Eukaryota_unclassified	Eukaryota_unclassified
OTU_2478	0	0	0	0	0	0	0	1.14e-05	0	0	0	0	0	0.000330239	0	0	0	0	0	1.76e-05	1.45e-05	3.07e-05	0.000163773	0	1.54e-05	1.46e-05	0	0	0	0	0	0	0	0	Eukaryota	Eukaryota_unclassified	Eukaryota_unclassified	Eukaryota_unclassified	Eukaryota_unclassified	Eukaryota_unclassified	Eukaryota_unclassified	Eukaryota_unclassified
OTU_1585	0	0	0	0	0	0	0	0	0	0	0	0	0.00271007	0	0	0	0	0	0	0	0	0	0	0	0	0	0	0	0	0	0	0	0	0	Eukaryota	Eukaryota_unclassified	Eukaryota_unclassified	Eukaryota_unclassified	Eukaryota_unclassified	Eukaryota_unclassified	Eukaryota_unclassified	Eukaryota_unclassified
OTU_1307	0	0	0	0	2.72e-05	0	0	0	0	0	0	0	0.00286373	0	0	0	0	0	0	0	0	0	0	0	0	0	0	0	0	0	0	0	0	0	Eukaryota	Eukaryota_unclassified	Eukaryota_unclassified	Eukaryota_unclassified	Eukaryota_unclassified	Eukaryota_unclassified	Eukaryota_unclassified	Eukaryota_unclassified
OTU_4256	0	0	0	0	0	0	0	0	0	0	0	0	0.00248655	0	0	0	0	0	0	0	0	0	0	0	0	0	0	0	0	0	0	0	0	0	Eukaryota	Eukaryota_unclassified	Eukaryota_unclassified	Eukaryota_unclassified	Eukaryota_unclassified	Eukaryota_unclassified	Eukaryota_unclassified	Eukaryota_unclassified
OTU_1938	0	0	0	0	0	0	0	0	0	0	0	0	0.00125725	0	0	0	0	0	0	0	0	0	0	0	0	0	0	0	0	0	0	0	0	0	Eukaryota	Eukaryota_unclassified	Eukaryota_unclassified	Eukaryota_unclassified	Eukaryota_unclassified	Eukaryota_unclassified	Eukaryota_unclassified	Eukaryota_unclassified
OTU_1509	0	0	2.1e-05	0	0	0	0	0	0	0	0	0.00362319	0	0	0	0	0	0	0	0	0	0	0	0	0	0	0	0	0	0	0	0	0	0	Eukaryota	Eukaryota_unclassified	Eukaryota_unclassified	Eukaryota_unclassified	Eukaryota_unclassified	Eukaryota_unclassified	Eukaryota_unclassified	Eukaryota_unclassified
OTU_1561	0	0	0	0	0	0	0	0	0	0	0	0	0	0	0.0060722	0	0	0	0	0	0	0	0	0	0	0	0	0	0	0	0	0	0	0	Eukaryota	Eukaryota_unclassified	Eukaryota_unclassified	Eukaryota_unclassified	Eukaryota_unclassified	Eukaryota_unclassified	Eukaryota_unclassified	Eukaryota_unclassified
OTU_608	0	0	0	0	0	0	0	0	0	0	0	0	0	0.00198144	0	0	0	0	0	0	0	0	0	0	0	0	0	0	0	0	0	0	0	0	Eukaryota	Eukaryota_unclassified	Eukaryota_unclassified	Eukaryota_unclassified	Eukaryota_unclassified	Eukaryota_unclassified	Eukaryota_unclassified	Eukaryota_unclassified
OTU_2799	0	0	0	0	0	0	0	0	0	0	0	0	0	0.000401005	0	0	0	0	0	0	0	0	0	0	0	0	0	0	0	0	0	0	0	0	Eukaryota	Eukaryota_unclassified	Eukaryota_unclassified	Eukaryota_unclassified	Eukaryota_unclassified	Eukaryota_unclassified	Eukaryota_unclassified	Eukaryota_unclassified
OTU_729	0	0	0	0	0	0	0	0	0	0	0	0	0	0.000908158	0	0	0	0	0	0	0	0	4.09e-05	0	3.07e-05	0.000102081	0.000325614	0	0	0	0	0	4.45e-05	0.000324388	Eukaryota	Eukaryota_unclassified	Eukaryota_unclassified	Eukaryota_unclassified	Eukaryota_unclassified	Eukaryota_unclassified	Eukaryota_unclassified	Eukaryota_unclassified
OTU_1324	0	0	0	0	0	0	0	0	0	0	0	0	0	0.00115584	0	0	0	0	0	0	0	0	0	0	0	0	0	0	0	0	0	0	0	0.000309643	Eukaryota	Eukaryota_unclassified	Eukaryota_unclassified	Eukaryota_unclassified	Eukaryota_unclassified	Eukaryota_unclassified	Eukaryota_unclassified	Eukaryota_unclassified
OTU_2697	0	0	0	0	0	0	0	0	0	0	0	0	0	0.000483565	0	0	0	0	0	0	0	0	0	0	0	0	0	0	0	0	0	0	0	0	Eukaryota	Eukaryota_unclassified	Eukaryota_unclassified	Eukaryota_unclassified	Eukaryota_unclassified	Eukaryota_unclassified	Eukaryota_unclassified	Eukaryota_unclassified
OTU_2265	0	0	0	0	0	0	0	0	0	0	0	0	0	0.000695861	0	0	0	0	0	0	0	0	0	0	0	0	0	0	0	0	0	0	0	0	Eukaryota	Eukaryota_unclassified	Eukaryota_unclassified	Eukaryota_unclassified	Eukaryota_unclassified	Eukaryota_unclassified	Eukaryota_unclassified	Eukaryota_unclassified
OTU_2769	0	0	0	0	0	0	0	0	0	0	0	0	0	0.000412799	0	0	0	0	0	0	0	0	0	0	4.61e-05	0	0	0	0	0	0	0	1.48e-05	0	Eukaryota	Eukaryota_unclassified	Eukaryota_unclassified	Eukaryota_unclassified	Eukaryota_unclassified	Eukaryota_unclassified	Eukaryota_unclassified	Eukaryota_unclassified
OTU_2252	0	0	0	0	0	0	0	0	0	0	0	0	0	0.000684067	0	0	0	0	0	0	0	0	0	0	0	0	0	0	0	0	0	0	0	0	Eukaryota	Eukaryota_unclassified	Eukaryota_unclassified	Eukaryota_unclassified	Eukaryota_unclassified	Eukaryota_unclassified	Eukaryota_unclassified	Eukaryota_unclassified
OTU_3520	0	0	0	0	0	0	0	0	0	0	0	0	0	0.00016512	0	0	0	0	0	0	0	0	0	0	0	0	0	0	0	0	0	0	0	0.000280153	Eukaryota	Eukaryota_unclassified	Eukaryota_unclassified	Eukaryota_unclassified	Eukaryota_unclassified	Eukaryota_unclassified	Eukaryota_unclassified	Eukaryota_unclassified
OTU_1249	0	0	0	0	0	0	0	0	0	0	0	0	0	1.18e-05	0	0	0	0	0	1.76e-05	0	0.00010759	2.73e-05	0.000117675	6.14e-05	7.29e-05	0.000142456	0	0.000210785	0	0	0	0.000133632	0.000516072	Eukaryota	Eukaryota_unclassified	Eukaryota_unclassified	Eukaryota_unclassified	Eukaryota_unclassified	Eukaryota_unclassified	Eukaryota_unclassified	Eukaryota_unclassified
OTU_1369	0	0	0	0	0	0	0	0	0	0	0.0030159	0	0	0	0	0	0	0	0	0	0	0	0	0	0	0	0	0	0	0	0	0	0	0	Eukaryota	Eukaryota_unclassified	Eukaryota_unclassified	Eukaryota_unclassified	Eukaryota_unclassified	Eukaryota_unclassified	Eukaryota_unclassified	Eukaryota_unclassified
OTU_1842	0	0	0	0	0	0	0	0	0	0	0.00129253	0	0	0	0	0	0	0	0	0	0	0	4.09e-05	0	0.00010752	0	0	0	0	0	0	0	2.97e-05	0	Eukaryota	Eukaryota_unclassified	Eukaryota_unclassified	Eukaryota_unclassified	Eukaryota_unclassified	Eukaryota_unclassified	Eukaryota_unclassified	Eukaryota_unclassified
OTU_3569	0	0	0	0	0	0	0	0	0	0.000476535	0	0	0	0	0	0	0	0	0	0	0	0	0	0	0	0	0	0	0	0	0	0	0	0	Eukaryota	Eukaryota_unclassified	Eukaryota_unclassified	Eukaryota_unclassified	Eukaryota_unclassified	Eukaryota_unclassified	Eukaryota_unclassified	Eukaryota_unclassified
OTU_5045	0	0	0	0	0	0	0	0	0	1.76e-05	0	0	0	0	0	0	0	0	0	3.53e-05	0	9.22e-05	0.000109182	0	0.000291841	1.46e-05	4.07e-05	0	0.000983664	0	0	0	0	0	Eukaryota	Eukaryota_unclassified	Eukaryota_unclassified	Eukaryota_unclassified	Eukaryota_unclassified	Eukaryota_unclassified	Eukaryota_unclassified	Eukaryota_unclassified
OTU_1626	0	0	0	0	0	0	0.0145081	0.0314655	0	0	0	1.73e-05	0	0	0	0	1.53e-05	0	0	0	0	0	0	0	0	0	0	0	0	0	0	0	0	0	Eukaryota	Eukaryota_unclassified	Eukaryota_unclassified	Eukaryota_unclassified	Eukaryota_unclassified	Eukaryota_unclassified	Eukaryota_unclassified	Eukaryota_unclassified
OTU_1810	0	0	0	0	0	0	0.00135101	0	0	0	0	0	0	0	0	0	0	0	0	0	0	0	0	0	0	0	0	0	0	0	0	0	0	0	Eukaryota	Eukaryota_unclassified	Eukaryota_unclassified	Eukaryota_unclassified	Eukaryota_unclassified	Eukaryota_unclassified	Eukaryota_unclassified	Eukaryota_unclassified
OTU_1631	0	0	0	0	0	0	0.00171614	0	0	0	0	0	0	0	0	0	0	0	0	0	0	0	0	0	0	0	0	0	0	0	0	0	0	0	Eukaryota	Eukaryota_unclassified	Eukaryota_unclassified	Eukaryota_unclassified	Eukaryota_unclassified	Eukaryota_unclassified	Eukaryota_unclassified	Eukaryota_unclassified
OTU_3192	0	0	0	0	0	0	0.000450335	0	0	0	0	0	0	0	0	0	0	0	0	0	0	0	0	0	0	0	0	0	0	0	0	0	0	0	Eukaryota	Eukaryota_unclassified	Eukaryota_unclassified	Eukaryota_unclassified	Eukaryota_unclassified	Eukaryota_unclassified	Eukaryota_unclassified	Eukaryota_unclassified
OTU_1871	0	0	0	0	0	0	0.000827643	0	0	0	0	0	0	0	0	0	0	0	0	0	0	0	0	0	0	0	0	0	0	0	0	0	0	0	Eukaryota	Eukaryota_unclassified	Eukaryota_unclassified	Eukaryota_unclassified	Eukaryota_unclassified	Eukaryota_unclassified	Eukaryota_unclassified	Eukaryota_unclassified
OTU_949	0	0	0	0	0	0	0.00107107	0	0	0	0	0	0	0	0	0	1.53e-05	1.78e-05	0	0	0.000116151	0	0	0	0	0	0	0	0	0	0	0	0	0	Eukaryota	Eukaryota_unclassified	Eukaryota_unclassified	Eukaryota_unclassified	Eukaryota_unclassified	Eukaryota_unclassified	Eukaryota_unclassified	Eukaryota_unclassified
OTU_4538	0	0	0	1.76e-05	0	0	0.00049902	0	0	0	0	0	0	0	0	0	0	5.34e-05	0	0	0	0	0	0	0	0	0	0	0	0	0	0	0	0	Eukaryota	Eukaryota_unclassified	Eukaryota_unclassified	Eukaryota_unclassified	Eukaryota_unclassified	Eukaryota_unclassified	Eukaryota_unclassified	Eukaryota_unclassified
OTU_1582	0	0	0	0	0	0	0.0016918	0	0	0	0	0	0	0	0	0	0.000122382	8.9e-05	0	0	0	0	0	0	0	0	0	0	0	0	0	0	0	0	Eukaryota	Eukaryota_unclassified	Eukaryota_unclassified	Eukaryota_unclassified	Eukaryota_unclassified	Eukaryota_unclassified	Eukaryota_unclassified	Eukaryota_unclassified
OTU_2880	0	0	0	0	0	0	0.000547705	0	0	0	0	0	0	0	0	0	0	1.78e-05	0	0	0	0	0	0	0	0	0	0	0	0	0	0	0	0	Eukaryota	Eukaryota_unclassified	Eukaryota_unclassified	Eukaryota_unclassified	Eukaryota_unclassified	Eukaryota_unclassified	Eukaryota_unclassified	Eukaryota_unclassified
OTU_4600	0	0	0	0	0	0	0.000243424	0	0	0	0	0	0	0	0	0	0.000244764	0	0	0	4.36e-05	0	0	0	0	0	0	0	0	0	0	0	0	0	Eukaryota	Eukaryota_unclassified	Eukaryota_unclassified	Eukaryota_unclassified	Eukaryota_unclassified	Eukaryota_unclassified	Eukaryota_unclassified	Eukaryota_unclassified
OTU_2148	0	0	0	0	0	0	0.000803301	0	0	0	0	0	0	0	0	0	3.06e-05	0	0	0	0	0	0	0	0	0	0	0	0	0	0	0	0	0	Eukaryota	Eukaryota_unclassified	Eukaryota_unclassified	Eukaryota_unclassified	Eukaryota_unclassified	Eukaryota_unclassified	Eukaryota_unclassified	Eukaryota_unclassified
OTU_4561	4.2e-05	0	0	8.8e-06	0	0	7.3e-05	0	0	0	0	0	0	0	0	0	4.59e-05	0.000266909	0	0	0	0	0	0	0	0	0	0	0	0	0	0	0	0	Eukaryota	Eukaryota_unclassified	Eukaryota_unclassified	Eukaryota_unclassified	Eukaryota_unclassified	Eukaryota_unclassified	Eukaryota_unclassified	Eukaryota_unclassified
OTU_4519	0	0	0	0	0	0	0.000267767	0	0	0	0	0	0	0	0	0.000135254	0	1.78e-05	0	0	0	0	0	0	0	0	0	0	0	0	0	0	0	0	Eukaryota	Eukaryota_unclassified	Eukaryota_unclassified	Eukaryota_unclassified	Eukaryota_unclassified	Eukaryota_unclassified	Eukaryota_unclassified	Eukaryota_unclassified
OTU_7832	0	0	0	0	0	0	0.000438164	0.000819355	0	0	0	0	0	0	0	0	0	0	0	0	0	0	0	0	0	0	0	0	0	0	0	0	0	0	Eukaryota	Eukaryota_unclassified	Eukaryota_unclassified	Eukaryota_unclassified	Eukaryota_unclassified	Eukaryota_unclassified	Eukaryota_unclassified	Eukaryota_unclassified
OTU_2847	0	0	0	0	0	0	0.000365137	0	0	0	0	0	0	0	0	0.000202881	7.65e-05	0	0	0	0	0	0	0	0	0	0	0	0	0	0	0	0	0	Eukaryota	Eukaryota_unclassified	Eukaryota_unclassified	Eukaryota_unclassified	Eukaryota_unclassified	Eukaryota_unclassified	Eukaryota_unclassified	Eukaryota_unclassified
OTU_2970	0	0	0	0	0	0	6.09e-05	0	0	0	0	0	0	0	0	0	0	0	0	0	0	0	0	0	0	0	0	0	0	0.0190017	3.31e-05	0	0	0	Eukaryota	Eukaryota_unclassified	Eukaryota_unclassified	Eukaryota_unclassified	Eukaryota_unclassified	Eukaryota_unclassified	Eukaryota_unclassified	Eukaryota_unclassified
OTU_2972	0	0	0	0	0	0	1.22e-05	0	0	0	0	0	0	0	0	0	0	0	0	0	0	0	0	0	0	0	0	0	0	0	0.00981656	0	0	0	Eukaryota	Eukaryota_unclassified	Eukaryota_unclassified	Eukaryota_unclassified	Eukaryota_unclassified	Eukaryota_unclassified	Eukaryota_unclassified	Eukaryota_unclassified
OTU_4753	0	0	0	0	0	0	0.000255596	0	0	0	0	0	0	0	0	0	6.12e-05	5.34e-05	1.97e-05	3.53e-05	7.26e-05	3.07e-05	0	0	0	0	0	0	0	0	0	0	0	0	Eukaryota	Eukaryota_unclassified	Eukaryota_unclassified	Eukaryota_unclassified	Eukaryota_unclassified	Eukaryota_unclassified	Eukaryota_unclassified	Eukaryota_unclassified
OTU_3014	0	0	0	0	0	0	1.22e-05	0	0	0	1.44e-05	0	0	0	0	0	0	0	7.9e-05	0	0	0	0	9.41e-05	1.54e-05	0	2.04e-05	0.000207797	0	0.000539054	3.31e-05	0	1.48e-05	0.000206429	Eukaryota	Eukaryota_unclassified	Eukaryota_unclassified	Eukaryota_unclassified	Eukaryota_unclassified	Eukaryota_unclassified	Eukaryota_unclassified	Eukaryota_unclassified
OTU_16261	0	0	0	0	0	0	3.65e-05	0	0	0	0	0	0	0	0	2.25e-05	0.000122382	5.34e-05	0	1.76e-05	0.000116151	0	0	0	0	0	0	0	0	0	0	0	0	0	Eukaryota	Eukaryota_unclassified	Eukaryota_unclassified	Eukaryota_unclassified	Eukaryota_unclassified	Eukaryota_unclassified	Eukaryota_unclassified	Eukaryota_unclassified
OTU_1288	0	0	0	0	0	0	0.000182568	0	0	0	0	0	0	0	0	0	0.000260062	0.000284703	7.9e-05	1.76e-05	0.000813055	0	9.55e-05	0	0	0	0	0	0	0	0	0	0	0	Eukaryota	Eukaryota_unclassified	Eukaryota_unclassified	Eukaryota_unclassified	Eukaryota_unclassified	Eukaryota_unclassified	Eukaryota_unclassified	Eukaryota_unclassified
OTU_5167	0	0	0	0	0	0	6.09e-05	0	0	0	0	0	0	0	0	9.02e-05	0.000183573	8.9e-05	0.000157903	0	0.000145188	0	0	0	0	0	0	0	0	0	0	0	0	0	Eukaryota	Eukaryota_unclassified	Eukaryota_unclassified	Eukaryota_unclassified	Eukaryota_unclassified	Eukaryota_unclassified	Eukaryota_unclassified	Eukaryota_unclassified
OTU_3030	0	0	0	0	0	0	1.22e-05	0	0	0	0	0	0.0022351	0	0	0	0	0	0	0	0	0	0	0	0	0	0	0	0	0	0	0	0	0	Eukaryota	Eukaryota_unclassified	Eukaryota_unclassified	Eukaryota_unclassified	Eukaryota_unclassified	Eukaryota_unclassified	Eukaryota_unclassified	Eukaryota_unclassified
OTU_4630	0	0	0	0	0	0	2.43e-05	0	0	0	0	0	0	0	0	0	0	0	1.97e-05	0	0	0	0	0	0	0	0	0	0	0.00442025	0.000198314	0	0	0	Eukaryota	Eukaryota_unclassified	Eukaryota_unclassified	Eukaryota_unclassified	Eukaryota_unclassified	Eukaryota_unclassified	Eukaryota_unclassified	Eukaryota_unclassified
OTU_4114	0	0	0	0	0	0	1.22e-05	0	0	0	0	0	0	0	0	0	0	0	0	0	0	0	0	0	0	0	0	0	0	0	0.000958519	0	0	0	Eukaryota	Eukaryota_unclassified	Eukaryota_unclassified	Eukaryota_unclassified	Eukaryota_unclassified	Eukaryota_unclassified	Eukaryota_unclassified	Eukaryota_unclassified
OTU_2383	0	0	0	0	0	0	4.87e-05	0	0	1.76e-05	2.87e-05	0	0	0	0	0	0	0	7.9e-05	1.76e-05	0	0	0	2.35e-05	0	0	0	0	0	0.000646865	0	6.26e-05	0	0	Eukaryota	Eukaryota_unclassified	Eukaryota_unclassified	Eukaryota_unclassified	Eukaryota_unclassified	Eukaryota_unclassified	Eukaryota_unclassified	Eukaryota_unclassified
OTU_5277	0	0	0	0	0	0	1.22e-05	0	0	0	0	0	0	0	0	0	0	0	0	0	0	0	0	0	0	0	0	0	0	0	0.000429681	0	0	0	Eukaryota	Eukaryota_unclassified	Eukaryota_unclassified	Eukaryota_unclassified	Eukaryota_unclassified	Eukaryota_unclassified	Eukaryota_unclassified	Eukaryota_unclassified
OTU_4001	0	0	0	0	0	0	1.22e-05	0	0	0	0	0	0	0	0	0	0	0	0	0	0	0	0	0	0	0	0	0	0	0.00059296	0	0	0	0	Eukaryota	Eukaryota_unclassified	Eukaryota_unclassified	Eukaryota_unclassified	Eukaryota_unclassified	Eukaryota_unclassified	Eukaryota_unclassified	Eukaryota_unclassified
OTU_1488	0	0	0	0	0	0	0	0.00227599	0	0	0	0	0	0	0	0	0	0	0	0	0	0	0	0	0	0	0	0	0	0	0	0	0	0	Eukaryota	Eukaryota_unclassified	Eukaryota_unclassified	Eukaryota_unclassified	Eukaryota_unclassified	Eukaryota_unclassified	Eukaryota_unclassified	Eukaryota_unclassified
OTU_1025	0	0	0	0	0	0	0	0.00256048	0	0	0	0	0	0	0	0	0	0	0	0	0	0	0	0	0	0	0	0	0	0	0	0	0	0	Eukaryota	Eukaryota_unclassified	Eukaryota_unclassified	Eukaryota_unclassified	Eukaryota_unclassified	Eukaryota_unclassified	Eukaryota_unclassified	Eukaryota_unclassified
OTU_1460	0	0	0	0	0	0	0	0.00165009	0	0	0	0	0	0	0	0	0	0	0	0	0	0	0	0	0	0	0	0	0	0	0	0	0	0	Eukaryota	Eukaryota_unclassified	Eukaryota_unclassified	Eukaryota_unclassified	Eukaryota_unclassified	Eukaryota_unclassified	Eukaryota_unclassified	Eukaryota_unclassified
OTU_835	0	0	0	0	0	0	0	0	0	0	0	0	0.00248655	0	0	0	0	0	0	0	0	0	0	0	0	0	0	0	0	0	0	0	0	0	Eukaryota	Eukaryota_unclassified	Eukaryota_unclassified	Eukaryota_unclassified	Eukaryota_unclassified	Eukaryota_unclassified	Eukaryota_unclassified	Eukaryota_unclassified
OTU_1113	0	0	0	0	0	0	0	0	0	0	0	0	0.00304533	0	0	0	0	0	0	0	0	0	0	0	0	0	0	0	0	0	0	0	0	0	Eukaryota	Eukaryota_unclassified	Eukaryota_unclassified	Eukaryota_unclassified	Eukaryota_unclassified	Eukaryota_unclassified	Eukaryota_unclassified	Eukaryota_unclassified
OTU_2651	0	0	0	0	0	0	0	0	0	0	0	0	0.00261228	0	0	0	0	0	0	0	0	0	0	0	0	0	0	0	0	0	0	0	0	0	Eukaryota	Eukaryota_unclassified	Eukaryota_unclassified	Eukaryota_unclassified	Eukaryota_unclassified	Eukaryota_unclassified	Eukaryota_unclassified	Eukaryota_unclassified
OTU_1180	0	0	0	0	0	0	0	0	0	0	0	0	0.00466578	0	0	0	0	0	0	0	0	0	0	0	0	0	0	0	0	0	0	0	0	0	Eukaryota	Eukaryota_unclassified	Eukaryota_unclassified	Eukaryota_unclassified	Eukaryota_unclassified	Eukaryota_unclassified	Eukaryota_unclassified	Eukaryota_unclassified
OTU_1395	0	0	0	0	0	0	1.22e-05	0	0	0	0	0	0.00363205	0	0	0	0	0	0	0	0	0	0	0	0	0	0	0	0	0	0	0	0	0	Eukaryota	Eukaryota_unclassified	Eukaryota_unclassified	Eukaryota_unclassified	Eukaryota_unclassified	Eukaryota_unclassified	Eukaryota_unclassified	Eukaryota_unclassified
OTU_443	0	0	0	0	0	0	0	0	0	0	0	0	0.00166236	0	0	0	0	0	0	5.29e-05	0	4.61e-05	0.000150126	2.35e-05	3.07e-05	7.29e-05	2.04e-05	0.000207797	7.03e-05	0	0	9.39e-05	0.00022272	7.37e-05	Eukaryota	Eukaryota_unclassified	Eukaryota_unclassified	Eukaryota_unclassified	Eukaryota_unclassified	Eukaryota_unclassified	Eukaryota_unclassified	Eukaryota_unclassified
OTU_2421	0	0	0	0	0	0	0	0	0	0	0	0	0.00209541	0	0	0	0	0	0	0	0	0	0	0	0	0	0	0	0	0	0	0	0	0	Eukaryota	Eukaryota_unclassified	Eukaryota_unclassified	Eukaryota_unclassified	Eukaryota_unclassified	Eukaryota_unclassified	Eukaryota_unclassified	Eukaryota_unclassified
OTU_2544	0	0	0	0	0	0	0	0	0	0	0	0	0.00159251	0	0	0	0	0	0	0	0	0	0	0	0	0	0	0	0	0	0	0	0	0	Eukaryota	Eukaryota_unclassified	Eukaryota_unclassified	Eukaryota_unclassified	Eukaryota_unclassified	Eukaryota_unclassified	Eukaryota_unclassified	Eukaryota_unclassified
OTU_2020	0	0	0	0	0	0	0	0	0	0	0	0	0.00141091	0	0	0	0	0	0	0	0	0	0	0	0	0	0	0	0	0	0	0	0	0	Eukaryota	Eukaryota_unclassified	Eukaryota_unclassified	Eukaryota_unclassified	Eukaryota_unclassified	Eukaryota_unclassified	Eukaryota_unclassified	Eukaryota_unclassified
OTU_2824	0	0	0	0	0	0	0	0	0	0	0	0	0.000852134	0	0	0	0	0	0	0	0	0	0	0	0	0	0	0	0	0	0	0	0	0	Eukaryota	Eukaryota_unclassified	Eukaryota_unclassified	Eukaryota_unclassified	Eukaryota_unclassified	Eukaryota_unclassified	Eukaryota_unclassified	Eukaryota_unclassified
OTU_5273	0	0	0	0	0	0	0	0	0	0	0	0	5.59e-05	0	0	0	0	5.34e-05	0	0	0.000217783	0	2.73e-05	0.000117675	0	0	0	0.000207797	3.51e-05	0	0.00158651	0.00167426	0	2.95e-05	Eukaryota	Eukaryota_unclassified	Eukaryota_unclassified	Eukaryota_unclassified	Eukaryota_unclassified	Eukaryota_unclassified	Eukaryota_unclassified	Eukaryota_unclassified
OTU_221	0	0	0	0	0	0.000143292	0	0	0	0	0	0	0	0.00406902	0	0	0	0	0	0	0	0	0	0	0	2.92e-05	0	0	0	0	0	0	0	0.00255087	Eukaryota	Eukaryota_unclassified	Eukaryota_unclassified	Eukaryota_unclassified	Eukaryota_unclassified	Eukaryota_unclassified	Eukaryota_unclassified	Eukaryota_unclassified
OTU_2639	0	0	0	0	0	0	0	0	0	0	0	0	0	0.00176914	0	0	0	0	0	0	0	0	0	0	0	0	0	0	0	0	0	0	0	0	Eukaryota	Eukaryota_unclassified	Eukaryota_unclassified	Eukaryota_unclassified	Eukaryota_unclassified	Eukaryota_unclassified	Eukaryota_unclassified	Eukaryota_unclassified
OTU_1474	0	0	0	0	0	0	0	0	0	0	0.0165874	0	0	0	0	0	0	0	0	0	0	0	0	0	0	0	0	0	0	0	0	0	0	0	Eukaryota	Eukaryota_unclassified	Eukaryota_unclassified	Eukaryota_unclassified	Eukaryota_unclassified	Eukaryota_unclassified	Eukaryota_unclassified	Eukaryota_unclassified
OTU_1727	0	0	0	0	0	0	0	0	0	0.0318396	0	0	0	0	0	0	0	0	0	0	0	0	0	0	0	0	0	0	0	0	0	0	0	0	Eukaryota	Eukaryota_unclassified	Eukaryota_unclassified	Eukaryota_unclassified	Eukaryota_unclassified	Eukaryota_unclassified	Eukaryota_unclassified	Eukaryota_unclassified
OTU_9280	0	0	0	0	0	0	0	0	0	0	0	0	0	0	0	0	0	0.000266909	0	0	0.000493641	0.0001537	2.73e-05	0.000541304	0	0	4.07e-05	0.000374034	3.51e-05	0	0.0020162	0.00392746	0	0	Eukaryota	Eukaryota_unclassified	Eukaryota_unclassified	Eukaryota_unclassified	Eukaryota_unclassified	Eukaryota_unclassified	Eukaryota_unclassified	Eukaryota_unclassified
OTU_6211	0	5.27e-05	2.1e-05	1.76e-05	0	0	0	0	0	0	0	0	0	0	0	0	0	0	0	1.76e-05	0	0.00012296	0.000109182	0	3.07e-05	1.46e-05	0	0	7.03e-05	0	0	0	0	0	Eukaryota	Eukaryota_unclassified	Eukaryota_unclassified	Eukaryota_unclassified	Eukaryota_unclassified	Eukaryota_unclassified	Eukaryota_unclassified	Eukaryota_unclassified
OTU_4996	0	0	0	0	0	0	0	0	0	0	0	0	0	0	0	0	0	0	1.97e-05	0.000317595	0	0.00016907	0.000163773	0	6.14e-05	2.92e-05	0	0	0	0	0	0	0	0	Eukaryota	Eukaryota_unclassified	Eukaryota_unclassified	Eukaryota_unclassified	Eukaryota_unclassified	Eukaryota_unclassified	Eukaryota_unclassified	Eukaryota_unclassified
OTU_9443	0	2.64e-05	0	0	0	0	0	0	0	0	0	0	0	0	0	0	0	0	0	0.000299951	0	0.000292029	0.000259308	0	3.07e-05	7.29e-05	0	0	0.000105393	0	0	0	0	0	Eukaryota	Eukaryota_unclassified	Eukaryota_unclassified	Eukaryota_unclassified	Eukaryota_unclassified	Eukaryota_unclassified	Eukaryota_unclassified	Eukaryota_unclassified
OTU_4868	0	2.64e-05	2.1e-05	0	0	0	0	0	0	0	0	0	0	0	0	0	0	0	0	0.000141153	0	0.000261289	0.000313899	0	0.00012288	4.37e-05	0	0	3.51e-05	0	0	0	0	0	Eukaryota	Eukaryota_unclassified	Eukaryota_unclassified	Eukaryota_unclassified	Eukaryota_unclassified	Eukaryota_unclassified	Eukaryota_unclassified	Eukaryota_unclassified
OTU_18101	0	0.000395424	0	0	0	0	0	0	0	0	0	0	0	0	0	0	0	0	0	0	0	0	0	0	0	0	0	0	0	0	0	0	0	0	Eukaryota	Eukaryota_unclassified	Eukaryota_unclassified	Eukaryota_unclassified	Eukaryota_unclassified	Eukaryota_unclassified	Eukaryota_unclassified	Eukaryota_unclassified
OTU_3121	0	0	0	0	0	0	0	0	0	0	0	0	0	0	0	0	0	0	1.97e-05	3.53e-05	5.81e-05	0.000384249	1.36e-05	0	0	0	0	0	0	0	0	0	0	0	Eukaryota	Eukaryota_unclassified	Eukaryota_unclassified	Eukaryota_unclassified	Eukaryota_unclassified	Eukaryota_unclassified	Eukaryota_unclassified	Eukaryota_unclassified
OTU_18172	0	0	0	0	0	0	0	0	0	0	0	0	0	0	0	0	0	0	0	0	0	9.22e-05	5.46e-05	0	1.54e-05	4.37e-05	2.04e-05	0	0.000175654	0	0	0	0	0	Eukaryota	Eukaryota_unclassified	Eukaryota_unclassified	Eukaryota_unclassified	Eukaryota_unclassified	Eukaryota_unclassified	Eukaryota_unclassified	Eukaryota_unclassified
OTU_6672	0	2.64e-05	4.21e-05	8.8e-06	0	0	0	0	0	0	0	0	0	0	0	0	0	0	0	0	0	9.22e-05	5.46e-05	0	4.61e-05	4.37e-05	0	0	7.03e-05	0	0	0	1.48e-05	5.9e-05	Eukaryota	Eukaryota_unclassified	Eukaryota_unclassified	Eukaryota_unclassified	Eukaryota_unclassified	Eukaryota_unclassified	Eukaryota_unclassified	Eukaryota_unclassified
OTU_11925	0	0	0	0	0	0	0	0	0	0	0	0	0	0	0	0	0	0	9.87e-05	0.000335239	0.000101632	6.15e-05	2.73e-05	0	0	0	0	0	0	0	0	0	0	0	Eukaryota	Eukaryota_unclassified	Eukaryota_unclassified	Eukaryota_unclassified	Eukaryota_unclassified	Eukaryota_unclassified	Eukaryota_unclassified	Eukaryota_unclassified
OTU_1189	0	0	0	0	0	0	0	0	0	0	0	0	0	0	0	0	0	0.00804285	0.0232512	0.000917496	0.000450084	0.000322769	4.09e-05	0	0.000215041	0	0	0	7.03e-05	0	0	0	0	0	Eukaryota	Eukaryota_unclassified	Eukaryota_unclassified	Eukaryota_unclassified	Eukaryota_unclassified	Eukaryota_unclassified	Eukaryota_unclassified	Eukaryota_unclassified
OTU_10439	0	2.64e-05	0	0	0	0	0	0	0	0	0	0	0	0	0	0	0	0	0	0	0	6.15e-05	0.000191069	0	3.07e-05	4.37e-05	0	0	3.51e-05	0	0	0	0	1.47e-05	Eukaryota	Eukaryota_unclassified	Eukaryota_unclassified	Eukaryota_unclassified	Eukaryota_unclassified	Eukaryota_unclassified	Eukaryota_unclassified	Eukaryota_unclassified
OTU_6318	0	0	0	0	0	0	0	0	0	0	0	0	0	0	0	0	0	0	0	0.000158797	5.81e-05	0.0001537	2.73e-05	0	0	0	0	0	0	0	0	0	0	0	Eukaryota	Eukaryota_unclassified	Eukaryota_unclassified	Eukaryota_unclassified	Eukaryota_unclassified	Eukaryota_unclassified	Eukaryota_unclassified	Eukaryota_unclassified
OTU_1401	0	0	0	0	0	0	0	0	0	0	0	0	0	0	0	0	0	0.000338084	0.000315806	0.000229374	0.00142285	1.54e-05	0.000150126	0.00014121	6.14e-05	0	0	0	0	0	0	0	0	0	Eukaryota	Eukaryota_unclassified	Eukaryota_unclassified	Eukaryota_unclassified	Eukaryota_unclassified	Eukaryota_unclassified	Eukaryota_unclassified	Eukaryota_unclassified
OTU_20040	0	0	0	0	0	0	0	0	0	0	0	0	0	0	0	0	0	0	0	0.000617545	0	6.15e-05	4.09e-05	0	0	0	0	0	0	0	0	0	0	0	Eukaryota	Eukaryota_unclassified	Eukaryota_unclassified	Eukaryota_unclassified	Eukaryota_unclassified	Eukaryota_unclassified	Eukaryota_unclassified	Eukaryota_unclassified
OTU_8111	2.1e-05	0	0	0	0	0	0	0	0	0	0	0	0	0	0	4.51e-05	0.000351849	0	0	0	0	0	0	0	0	0	0	0	0	0	0	0	0	0	Eukaryota	Eukaryota_unclassified	Eukaryota_unclassified	Eukaryota_unclassified	Eukaryota_unclassified	Eukaryota_unclassified	Eukaryota_unclassified	Eukaryota_unclassified
OTU_3041	0	0	0	8.8e-06	0	0	0	0	0	0	0	0	0	0	0	0.000338135	0.00171335	0	0	0	0	0	0	0	0	0	0	0	0	0	0	0	0	0	Eukaryota	Eukaryota_unclassified	Eukaryota_unclassified	Eukaryota_unclassified	Eukaryota_unclassified	Eukaryota_unclassified	Eukaryota_unclassified	Eukaryota_unclassified
OTU_4378	0	0	0	0	0	0	0	0	0	0	0	0	0	0	0	0.000405762	3.06e-05	0	0	0	0	0	0	0	0	0	0	0	0	0	0	0	0	0	Eukaryota	Eukaryota_unclassified	Eukaryota_unclassified	Eukaryota_unclassified	Eukaryota_unclassified	Eukaryota_unclassified	Eukaryota_unclassified	Eukaryota_unclassified
OTU_11850	0	0	0	8.8e-06	0	0	0	0	0	0	0	0	0	0	0	0.000112712	0.00113203	0	0	0	0	0	0	0	0	0	0	0	0	0	0	0	0	0	Eukaryota	Eukaryota_unclassified	Eukaryota_unclassified	Eukaryota_unclassified	Eukaryota_unclassified	Eukaryota_unclassified	Eukaryota_unclassified	Eukaryota_unclassified
OTU_3511	4.2e-05	0	0	0	0	0	0	0	0	0	0	0	0	0	0	0	0.00104025	0	0	0	0	0	0	0	0	0	0	0	0	0	0	0	0	0	Eukaryota	Eukaryota_unclassified	Eukaryota_unclassified	Eukaryota_unclassified	Eukaryota_unclassified	Eukaryota_unclassified	Eukaryota_unclassified	Eukaryota_unclassified
OTU_5049	0	0	0	0	0	0	0	0	0	0	0	0	0	0	0	0	7.65e-05	0.000284703	0.000157903	1.76e-05	0.000362971	4.61e-05	0.00012283	0	0	0	0	0	0	0	0	0	0	0	Eukaryota	Eukaryota_unclassified	Eukaryota_unclassified	Eukaryota_unclassified	Eukaryota_unclassified	Eukaryota_unclassified	Eukaryota_unclassified	Eukaryota_unclassified
OTU_5527	0	0	0	0	0	0	0	0	0	0	0	0	0	0	0	0	0	0.000658375	0.000157903	3.53e-05	1.45e-05	0	0	0	0	0	0	0	0	0	0	0	0	0	Eukaryota	Eukaryota_unclassified	Eukaryota_unclassified	Eukaryota_unclassified	Eukaryota_unclassified	Eukaryota_unclassified	Eukaryota_unclassified	Eukaryota_unclassified
OTU_1451	0	0	0	0	0	0	0	0	0	0	0	0	0	0	0	0	0.000397742	0.00072955	0.000631612	1.76e-05	0.00152448	0.00010759	0.00012283	0	0	1.46e-05	0	0	3.51e-05	0	0	0	0	0	Eukaryota	Eukaryota_unclassified	Eukaryota_unclassified	Eukaryota_unclassified	Eukaryota_unclassified	Eukaryota_unclassified	Eukaryota_unclassified	Eukaryota_unclassified
OTU_12107	0	0	0	0	0	0	0	0	0	0	0	0	0	0	0	0	6.12e-05	0.00530259	0.000888205	0.000617545	0.00792729	0.000307399	0.00197893	0	6.14e-05	0	6.11e-05	0	0	0	0	0	0	0	Eukaryota	Eukaryota_unclassified	Eukaryota_unclassified	Eukaryota_unclassified	Eukaryota_unclassified	Eukaryota_unclassified	Eukaryota_unclassified	Eukaryota_unclassified
OTU_19342	0	0	0	0	0	0	0	0	0	0	0	0	0	0	0	0	0	0.000284703	3.95e-05	1.76e-05	0	1.54e-05	2.73e-05	0	0	0	0	0	0	0	0	0	0	0	Eukaryota	Eukaryota_unclassified	Eukaryota_unclassified	Eukaryota_unclassified	Eukaryota_unclassified	Eukaryota_unclassified	Eukaryota_unclassified	Eukaryota_unclassified
OTU_5955	0	0	0	0	0	0	0	0	0	0	0	0	0	0	0	0	4.59e-05	0.000106763	1.97e-05	5.29e-05	0.00037749	0	0.000177421	0	3.07e-05	0	0	0	0	0	0	0	0	0	Eukaryota	Eukaryota_unclassified	Eukaryota_unclassified	Eukaryota_unclassified	Eukaryota_unclassified	Eukaryota_unclassified	Eukaryota_unclassified	Eukaryota_unclassified
OTU_705	0	0	0	0	0	0	0	0	0	0	0	0	0	0	0	9.02e-05	0.00111674	0.000658375	0.000828991	0.000141153	0.00262791	0.00012296	0.000163773	0	1.54e-05	0	0	0	0	0	0	0	0	0	Eukaryota	Eukaryota_unclassified	Eukaryota_unclassified	Eukaryota_unclassified	Eukaryota_unclassified	Eukaryota_unclassified	Eukaryota_unclassified	Eukaryota_unclassified
OTU_1429	0	0	0	0	0	0	0	0	0	0	0	0	0	0	0	0	6.12e-05	0.00124557	0.000256592	0.000141153	0.00174226	9.22e-05	0.00114641	0	0	0	0	0	0	0	0	0	0	0	Eukaryota	Eukaryota_unclassified	Eukaryota_unclassified	Eukaryota_unclassified	Eukaryota_unclassified	Eukaryota_unclassified	Eukaryota_unclassified	Eukaryota_unclassified
OTU_4563	0	0	0	0	0	0	0	0	0	0	0	0	0	0	0	0	0	0	0.000434233	0	0	0	0	0	0	0	0	0	0	0	0	0	0	0	Eukaryota	Eukaryota_unclassified	Eukaryota_unclassified	Eukaryota_unclassified	Eukaryota_unclassified	Eukaryota_unclassified	Eukaryota_unclassified	Eukaryota_unclassified
OTU_3658	0	0	0	0	0	0	0	0	0	0	0	0	0	0	0	0.000270508	0	0	0.000138165	0.00146447	4.36e-05	0.0001537	2.73e-05	0	0	0	0	0	0	0	0	0	0	0	Eukaryota	Eukaryota_unclassified	Eukaryota_unclassified	Eukaryota_unclassified	Eukaryota_unclassified	Eukaryota_unclassified	Eukaryota_unclassified	Eukaryota_unclassified
OTU_5280	0	0	0	0	0	0	0	0	0	0	0	0	0	0	0	0	0	0	0.00092768	0.000247018	1.45e-05	6.15e-05	0	0	0	0	0	0	0	0	0	0	0	0	Eukaryota	Eukaryota_unclassified	Eukaryota_unclassified	Eukaryota_unclassified	Eukaryota_unclassified	Eukaryota_unclassified	Eukaryota_unclassified	Eukaryota_unclassified
OTU_10768	0	0	0	0	0	0	0	0	0	0	0	0	0	0	0	0	0	0	0.000434233	8.82e-05	0.000232302	0	0	0	0	4.37e-05	0	0	0	0	0	0	0	1.47e-05	Eukaryota	Eukaryota_unclassified	Eukaryota_unclassified	Eukaryota_unclassified	Eukaryota_unclassified	Eukaryota_unclassified	Eukaryota_unclassified	Eukaryota_unclassified
OTU_3206	0	0	0	0	0	0	0	0	0	0	0	0	0	0	0	0	0	0	0.000907943	0.000123509	4.36e-05	1.54e-05	0	0	0	0	0	0	0	0	0	0	0	0	Eukaryota	Eukaryota_unclassified	Eukaryota_unclassified	Eukaryota_unclassified	Eukaryota_unclassified	Eukaryota_unclassified	Eukaryota_unclassified	Eukaryota_unclassified
OTU_4375	0	0	0	0	0	0	0	0	0	0	0	0	0	0	0	0	0	0	0.000611874	3.53e-05	0	0	0	0	0	0	0	0	0	0	0	0	0	0	Eukaryota	Eukaryota_unclassified	Eukaryota_unclassified	Eukaryota_unclassified	Eukaryota_unclassified	Eukaryota_unclassified	Eukaryota_unclassified	Eukaryota_unclassified
OTU_9325	0	0	0	0	0	0	0	0	0	0	0	0	0	0	0	0	0	0.000231321	0.000453971	1.76e-05	0	0	0	0	0	0	0	0	0	0	0	0	0	0	Eukaryota	Eukaryota_unclassified	Eukaryota_unclassified	Eukaryota_unclassified	Eukaryota_unclassified	Eukaryota_unclassified	Eukaryota_unclassified	Eukaryota_unclassified
OTU_12191	0	0	0	0	0	0	0	0	0	0	0	0	0	0	0	0	0	0.000160145	0.000888205	0.000388171	0	0	0	0	0	0	0	0	0	0	0	0	0	0	Eukaryota	Eukaryota_unclassified	Eukaryota_unclassified	Eukaryota_unclassified	Eukaryota_unclassified	Eukaryota_unclassified	Eukaryota_unclassified	Eukaryota_unclassified
OTU_2269	0	0	0	0	0	0	0	0	0	0	0	0	0	0	0	9.02e-05	4.59e-05	0.000142351	0.000157903	0	0.000493641	0	4.09e-05	0	0	0	0	0	0	0	0	0	0	0	Eukaryota	Eukaryota_unclassified	Eukaryota_unclassified	Eukaryota_unclassified	Eukaryota_unclassified	Eukaryota_unclassified	Eukaryota_unclassified	Eukaryota_unclassified
OTU_5932	0	0	0	0	0	0	0	0	0	0	0	0	0	0	0	0	0	0	0	0.00109394	5.81e-05	3.07e-05	0.000204717	0	1.54e-05	2.92e-05	0	0	0	0	0	0	0	0	Eukaryota	Eukaryota_unclassified	Eukaryota_unclassified	Eukaryota_unclassified	Eukaryota_unclassified	Eukaryota_unclassified	Eukaryota_unclassified	Eukaryota_unclassified
OTU_11156	0	0	0	0	0	0	0	0	0	0	0	0	0	0	0	0	0	0	0.000177641	5.29e-05	0.000101632	0.00010759	8.19e-05	0	0.000261121	2.92e-05	4.07e-05	0	3.51e-05	0	0	0	0	0	Eukaryota	Eukaryota_unclassified	Eukaryota_unclassified	Eukaryota_unclassified	Eukaryota_unclassified	Eukaryota_unclassified	Eukaryota_unclassified	Eukaryota_unclassified
OTU_298	0	0	0	0	0	0	0	0	0	0	0	0	0	0	0	0	0.000382444	0.000693963	0.000868467	3.53e-05	0.0114989	0.0001537	0.000709684	0	7.68e-05	1.46e-05	2.04e-05	0	3.51e-05	0	0	0	0	0	Eukaryota	Eukaryota_unclassified	Eukaryota_unclassified	Eukaryota_unclassified	Eukaryota_unclassified	Eukaryota_unclassified	Eukaryota_unclassified	Eukaryota_unclassified
OTU_8163	0	0	0	0	0	0	0	0	0	0	0	0	0	0	0	0	0	0	9.87e-05	0.000229374	2.9e-05	0.00010759	2.73e-05	0	4.61e-05	0	0	0	7.03e-05	0	0	0	0	0	Eukaryota	Eukaryota_unclassified	Eukaryota_unclassified	Eukaryota_unclassified	Eukaryota_unclassified	Eukaryota_unclassified	Eukaryota_unclassified	Eukaryota_unclassified
OTU_15899	0	0	0	0	0	0	0	0	0	0	0	0	0	0	0	0	0	0	0.000434233	0.00021173	1.45e-05	0.000276659	2.73e-05	0	0	0	0	0	0	0	0	0	0	0	Eukaryota	Eukaryota_unclassified	Eukaryota_unclassified	Eukaryota_unclassified	Eukaryota_unclassified	Eukaryota_unclassified	Eukaryota_unclassified	Eukaryota_unclassified
OTU_8261	0	0	0	0	0	0	0	0	0	0	0	0	0	0	0	2.25e-05	0	0	0.000236855	0.000105865	0	1.54e-05	1.36e-05	0	0	0	0	0	0	0	0	0	0	0	Eukaryota	Eukaryota_unclassified	Eukaryota_unclassified	Eukaryota_unclassified	Eukaryota_unclassified	Eukaryota_unclassified	Eukaryota_unclassified	Eukaryota_unclassified
OTU_16236	0	0	0	0	0	0	0	0	0	0	0	0	0	0	0	0	0	0	0.000177641	0.00194086	1.45e-05	9.22e-05	2.73e-05	0	0	0	0	0	0	0	0	0	0	0	Eukaryota	Eukaryota_unclassified	Eukaryota_unclassified	Eukaryota_unclassified	Eukaryota_unclassified	Eukaryota_unclassified	Eukaryota_unclassified	Eukaryota_unclassified
OTU_7228	0	0	0	0	0	0	0	0	0	0	0	0	0	0	0	0	0	0	9.87e-05	0.00158797	2.9e-05	0.00012296	2.73e-05	0	0	1.46e-05	0	0	0	0	0	0	0	0	Eukaryota	Eukaryota_unclassified	Eukaryota_unclassified	Eukaryota_unclassified	Eukaryota_unclassified	Eukaryota_unclassified	Eukaryota_unclassified	Eukaryota_unclassified
OTU_3171	0	0	0	0	0	0	0	0	0	0	0	0	0	0	0	0	0	3.56e-05	0	0	0.000392009	0	0	0	0	0	0	0	0	0	0	0	0	0	Eukaryota	Eukaryota_unclassified	Eukaryota_unclassified	Eukaryota_unclassified	Eukaryota_unclassified	Eukaryota_unclassified	Eukaryota_unclassified	Eukaryota_unclassified
OTU_2277	0	0	0	0	0	0	0	0	0	0	0	0	0	0	0	0	1.53e-05	5.34e-05	7.9e-05	8.82e-05	0.000609792	6.15e-05	0.000109182	0	0	0	0	0	0	0	0	0	0	0	Eukaryota	Eukaryota_unclassified	Eukaryota_unclassified	Eukaryota_unclassified	Eukaryota_unclassified	Eukaryota_unclassified	Eukaryota_unclassified	Eukaryota_unclassified
OTU_18797	0	0	0	0	0	0	0	0	0	0	0	0	0	0	0	0	1.53e-05	0.000124557	0.000315806	0	0.000290377	0	5.46e-05	0	0	0	0	0	0	0	0	0	0	0	Eukaryota	Eukaryota_unclassified	Eukaryota_unclassified	Eukaryota_unclassified	Eukaryota_unclassified	Eukaryota_unclassified	Eukaryota_unclassified	Eukaryota_unclassified
OTU_9755	0	0	0	0	0	0	0	0	0	0	0	0	0	0	0	0	0	0	0	0.00051168	0	3.07e-05	6.82e-05	0	0	0	0	0	3.51e-05	0	0	0	0	0	Eukaryota	Eukaryota_unclassified	Eukaryota_unclassified	Eukaryota_unclassified	Eukaryota_unclassified	Eukaryota_unclassified	Eukaryota_unclassified	Eukaryota_unclassified
OTU_5551	0	0	0	0	0	0	0	0	0	0	0	0	0	0	0	0	0	0	0	0.000388171	4.36e-05	0.000199809	0.000163773	0	0.00010752	0	0	0	0.000175654	0	0	0	0	0	Eukaryota	Eukaryota_unclassified	Eukaryota_unclassified	Eukaryota_unclassified	Eukaryota_unclassified	Eukaryota_unclassified	Eukaryota_unclassified	Eukaryota_unclassified
OTU_11149	0	0	0	0	0	0	0	0	0	0	0	0	0	0	0	0	0	0	0	0	0	0.00012296	4.09e-05	4.71e-05	6.14e-05	0	2.04e-05	0	7.03e-05	0	0	0	0	0	Eukaryota	Eukaryota_unclassified	Eukaryota_unclassified	Eukaryota_unclassified	Eukaryota_unclassified	Eukaryota_unclassified	Eukaryota_unclassified	Eukaryota_unclassified
OTU_8007	0	0	0	0	0	0	0	0	0	0	0	0	0	0	0	0	1.53e-05	0.000266909	7.9e-05	1.76e-05	0.000145188	3.07e-05	0.000259308	0	0	0	0	0	0	0	0	0	0	0	Eukaryota	Eukaryota_unclassified	Eukaryota_unclassified	Eukaryota_unclassified	Eukaryota_unclassified	Eukaryota_unclassified	Eukaryota_unclassified	Eukaryota_unclassified
OTU_4837	0	0	0	0	0	0	0	0	0	0	0	0	0	0	0	0	0	0	0	7.06e-05	0	0	0.000177421	0	3.07e-05	2.92e-05	0	0	0.000281047	0	0	0	0	2.95e-05	Eukaryota	Eukaryota_unclassified	Eukaryota_unclassified	Eukaryota_unclassified	Eukaryota_unclassified	Eukaryota_unclassified	Eukaryota_unclassified	Eukaryota_unclassified
OTU_11819	0	7.91e-05	0.000231477	4.4e-05	2.72e-05	0	0	0	0	0	0	0	0	0	0	0	0	0	0	0	0	0	0	0	0	0	2.04e-05	0	0	0	0	0	0	0	Eukaryota	Eukaryota_unclassified	Eukaryota_unclassified	Eukaryota_unclassified	Eukaryota_unclassified	Eukaryota_unclassified	Eukaryota_unclassified	Eukaryota_unclassified
OTU_5376	0	0	0	0	0	0	0	0	0	0	0	0	0	0	0	0	0	0	0	5.29e-05	0	0.000215179	0.000218364	4.71e-05	0.000414721	1.46e-05	4.07e-05	0	0.00105393	0	0	0	0	0	Eukaryota	Eukaryota_unclassified	Eukaryota_unclassified	Eukaryota_unclassified	Eukaryota_unclassified	Eukaryota_unclassified	Eukaryota_unclassified	Eukaryota_unclassified
OTU_7877	0	0	0	0	0	0	0	0	0	0	0	0	0	0	0	0	0	0	0	0	0	0.00016907	2.73e-05	0	0.000261121	0	0	0	0.000562094	0	0	0	0	0	Eukaryota	Eukaryota_unclassified	Eukaryota_unclassified	Eukaryota_unclassified	Eukaryota_unclassified	Eukaryota_unclassified	Eukaryota_unclassified	Eukaryota_unclassified
OTU_4979	0	0.000448147	0.000231477	0.000175985	0	1.59e-05	0	0	0	0	0	0	0	0	0	0	0	0	0	0	0	0	1.36e-05	0	0	0	0	0	3.51e-05	0	0	0	0	0	Eukaryota	Eukaryota_unclassified	Eukaryota_unclassified	Eukaryota_unclassified	Eukaryota_unclassified	Eukaryota_unclassified	Eukaryota_unclassified	Eukaryota_unclassified
OTU_18208	0	0	0	0	0	0	0	0	0	0	0	0	0	0	0	0	0	0	0	7.06e-05	0	6.15e-05	2.73e-05	0	4.61e-05	1.46e-05	0	0	0.000245916	0	0	0	0	2.95e-05	Eukaryota	Eukaryota_unclassified	Eukaryota_unclassified	Eukaryota_unclassified	Eukaryota_unclassified	Eukaryota_unclassified	Eukaryota_unclassified	Eukaryota_unclassified
OTU_1568	0	0	0	0	0	0	0	0	0	0	0	0	0	0	0	0	0	0	0	0	0	0	0	0	0	0	0	0.00660793	0	0	0	0	0	0	Eukaryota	Eukaryota_unclassified	Eukaryota_unclassified	Eukaryota_unclassified	Eukaryota_unclassified	Eukaryota_unclassified	Eukaryota_unclassified	Eukaryota_unclassified
OTU_7167	0	0	0	0	0	0	0	0	0	0	0	0	0	0	0	0	0	0	0	1.76e-05	0	0	8.19e-05	0	7.68e-05	0	2.04e-05	0	0.000245916	0	0	0	0	4.42e-05	Eukaryota	Eukaryota_unclassified	Eukaryota_unclassified	Eukaryota_unclassified	Eukaryota_unclassified	Eukaryota_unclassified	Eukaryota_unclassified	Eukaryota_unclassified
OTU_3044	0	0	0	0	0	0	0	0	0	0	0	0	0	0	0	0	0	0	0	0	0	0	0	0	0	0.000481239	0	0	0	0	0	0	0	1.47e-05	Eukaryota	Eukaryota_unclassified	Eukaryota_unclassified	Eukaryota_unclassified	Eukaryota_unclassified	Eukaryota_unclassified	Eukaryota_unclassified	Eukaryota_unclassified
OTU_14681	0	0	0	0	0	0	0	0	0	0	0	0	0	0	0	0	0	0	0	3.53e-05	0	1.54e-05	4.09e-05	0	4.61e-05	0	0	0	0.00042157	0	0	0	2.97e-05	0	Eukaryota	Eukaryota_unclassified	Eukaryota_unclassified	Eukaryota_unclassified	Eukaryota_unclassified	Eukaryota_unclassified	Eukaryota_unclassified	Eukaryota_unclassified
OTU_5517	0	0	0	0	0	0	0	0	0	0	0	0	0	0	0	2.25e-05	0.00027536	0.000124557	0.000197379	5.29e-05	0	0	0	0	0	0	0	0	0	0	0	0	0	0	Eukaryota	Eukaryota_unclassified	Eukaryota_unclassified	Eukaryota_unclassified	Eukaryota_unclassified	Eukaryota_unclassified	Eukaryota_unclassified	Eukaryota_unclassified
OTU_6893	0	0	0	0	0	0	0	0	0	0	0	0	0	0	0	2.25e-05	0.000810782	0	0	0	0	0	0	0	0	0	0	0	0	0	0	0	0	0	Eukaryota	Eukaryota_unclassified	Eukaryota_unclassified	Eukaryota_unclassified	Eukaryota_unclassified	Eukaryota_unclassified	Eukaryota_unclassified	Eukaryota_unclassified
OTU_12815	0	0	0	0	0	0	0	0	0	0	0	0	0	0	0	0.000225423	0.000107084	3.56e-05	5.92e-05	0	0	0	0	0	0	0	0	0	0	0	0	0	0	0	Eukaryota	Eukaryota_unclassified	Eukaryota_unclassified	Eukaryota_unclassified	Eukaryota_unclassified	Eukaryota_unclassified	Eukaryota_unclassified	Eukaryota_unclassified
OTU_2477	0	0	0	0	0	0	0	0	0	0	0	0	0	0	0	0	3.06e-05	1.78e-05	5.92e-05	0	0.000435565	0	0	0	0	0	0	0	0	0	0	0	0	0	Eukaryota	Eukaryota_unclassified	Eukaryota_unclassified	Eukaryota_unclassified	Eukaryota_unclassified	Eukaryota_unclassified	Eukaryota_unclassified	Eukaryota_unclassified
OTU_8310	0	0	0	0	0	0	0	0	0	0	0	0	0	0	0	0	0	0	0.000256592	0.000494036	8.71e-05	0	2.73e-05	0	0	0	0	0	0	0	0	0	0	0	Eukaryota	Eukaryota_unclassified	Eukaryota_unclassified	Eukaryota_unclassified	Eukaryota_unclassified	Eukaryota_unclassified	Eukaryota_unclassified	Eukaryota_unclassified
OTU_3172	0	0	0	0	0	0	0	0	0	0	0	0	0	0	0	0	0	0	0	0	0	0	0	0	0	0	0	0	0	0	0	0	0.000326657	0	Eukaryota	Eukaryota_unclassified	Eukaryota_unclassified	Eukaryota_unclassified	Eukaryota_unclassified	Eukaryota_unclassified	Eukaryota_unclassified	Eukaryota_unclassified
OTU_5864	0	0	0	0	0	0	0	0	0	0	0	0	0	0	0	0	0	0	0	0	0	0	2.73e-05	2.35e-05	4.61e-05	2.92e-05	0.000101754	0	0.000210785	0	0	0	1.48e-05	0	Eukaryota	Eukaryota_unclassified	Eukaryota_unclassified	Eukaryota_unclassified	Eukaryota_unclassified	Eukaryota_unclassified	Eukaryota_unclassified	Eukaryota_unclassified
OTU_15185	0	0	0	0	0	0	0	0	0	0	0	0	0	0	0	0	0	0	0	0	0	3.07e-05	0.00012283	0	0.00012288	0	0.000183158	0	0.000526963	0	0	0	0	0	Eukaryota	Eukaryota_unclassified	Eukaryota_unclassified	Eukaryota_unclassified	Eukaryota_unclassified	Eukaryota_unclassified	Eukaryota_unclassified	Eukaryota_unclassified
OTU_4511	0	0	0	0	0	0	0	0	0	0	0	0	0	0	0	0	0	0	0	0	0	1.54e-05	0.00012283	4.71e-05	7.68e-05	5.83e-05	0.000101754	0	0.00105393	0	0	0	1.48e-05	0	Eukaryota	Eukaryota_unclassified	Eukaryota_unclassified	Eukaryota_unclassified	Eukaryota_unclassified	Eukaryota_unclassified	Eukaryota_unclassified	Eukaryota_unclassified
OTU_2238	0	0	0	0	0	0	0	0	0	0	0	0	0	0	0	0	0	0	0	0	0	0	0	0	0	0	6.11e-05	0	0	0	0.000892414	0.000125178	0	5.9e-05	Eukaryota	Eukaryota_unclassified	Eukaryota_unclassified	Eukaryota_unclassified	Eukaryota_unclassified	Eukaryota_unclassified	Eukaryota_unclassified	Eukaryota_unclassified
OTU_3463	0	0	0	0	0	0	0	0	0	0	0	0	0	0	0	0	0	0	0	0	0	0	0	0	0	0	0	0	0	0.0121557	0	0	0	0	Eukaryota	Eukaryota_unclassified	Eukaryota_unclassified	Eukaryota_unclassified	Eukaryota_unclassified	Eukaryota_unclassified	Eukaryota_unclassified	Eukaryota_unclassified
OTU_3678	0	0	0	0	0	0	0	0	0	0	0	0	0	0	0	0.000180339	3.06e-05	1.78e-05	0	0	0.00013067	9.22e-05	0	0	4.61e-05	0	0	0	0	0	0	0	0	0	Eukaryota	Eukaryota_unclassified	Eukaryota_unclassified	Eukaryota_unclassified	Eukaryota_unclassified	Eukaryota_unclassified	Eukaryota_unclassified	Eukaryota_unclassified
OTU_4031	0	0	0	0	0	0	0	0	0	0	0	0	0	0	0	0	4.59e-05	0	5.92e-05	1.76e-05	0.000232302	0	0	0	1.54e-05	0	0	0	0	0	0	0	0	0	Eukaryota	Eukaryota_unclassified	Eukaryota_unclassified	Eukaryota_unclassified	Eukaryota_unclassified	Eukaryota_unclassified	Eukaryota_unclassified	Eukaryota_unclassified
OTU_1947	0	0	0	0	0	0	0	0	0	0	0	0	0	0	0	0	0	0	0	0	0	0	0	0.0019534	0.0001536	2.92e-05	0	0	0	0	0	0	0	4.42e-05	Eukaryota	Eukaryota_unclassified	Eukaryota_unclassified	Eukaryota_unclassified	Eukaryota_unclassified	Eukaryota_unclassified	Eukaryota_unclassified	Eukaryota_unclassified
OTU_7320	0	0	0	0	0	0	0	0	0	0	0	0	0	0	0	0	0	0	0	0	0	0	8.19e-05	0	4.61e-05	1.46e-05	8.14e-05	0	0.000175654	0	0	0	2.97e-05	0	Eukaryota	Eukaryota_unclassified	Eukaryota_unclassified	Eukaryota_unclassified	Eukaryota_unclassified	Eukaryota_unclassified	Eukaryota_unclassified	Eukaryota_unclassified
OTU_8211	0	0	0	0	0	0	0	0	0	0	0	0	0	0	0	0	0	0	0	0	0	0	0	0	0.0001536	0	0	0.000374034	0	0	0	0	0	0	Eukaryota	Eukaryota_unclassified	Eukaryota_unclassified	Eukaryota_unclassified	Eukaryota_unclassified	Eukaryota_unclassified	Eukaryota_unclassified	Eukaryota_unclassified
OTU_2899	0	0	0	0	0	0	0	0	0	0	0	0	0	0	0	0	0	0	0	0	5.81e-05	0.00016907	0	0	0.000276481	0	0	0	0	0	0	0	0	0	Eukaryota	Eukaryota_unclassified	Eukaryota_unclassified	Eukaryota_unclassified	Eukaryota_unclassified	Eukaryota_unclassified	Eukaryota_unclassified	Eukaryota_unclassified
OTU_3656	0	0	0	0	0	0	0	0	0	0	0	0	0	0	0	0	0	0	0	0	1.45e-05	0.000184439	0.00012283	0.000494234	3.07e-05	8.75e-05	0.000162807	4.16e-05	0	0	0	0.000109531	0.00014848	0.000162194	Eukaryota	Eukaryota_unclassified	Eukaryota_unclassified	Eukaryota_unclassified	Eukaryota_unclassified	Eukaryota_unclassified	Eukaryota_unclassified	Eukaryota_unclassified
OTU_7929	0	0	0	0	0	0	0	0	0	0	0	0	0	0	0	0	0	0	0	0	1.45e-05	0	0	0.001012	6.14e-05	0	0	4.16e-05	0	0.00180583	0.0006941	0	0	0	Eukaryota	Eukaryota_unclassified	Eukaryota_unclassified	Eukaryota_unclassified	Eukaryota_unclassified	Eukaryota_unclassified	Eukaryota_unclassified	Eukaryota_unclassified
OTU_7206	0	0	0	0	0	0	0	0	0	0	0	0	0	0	0	0	0	0	0	0	0	1.54e-05	2.73e-05	0	7.68e-05	0	2.04e-05	0	0.000281047	0	0	0	0	0	Eukaryota	Eukaryota_unclassified	Eukaryota_unclassified	Eukaryota_unclassified	Eukaryota_unclassified	Eukaryota_unclassified	Eukaryota_unclassified	Eukaryota_unclassified
OTU_4527	0	0	0	0	0	0	0	0	0	0	0	0	0	0	0	2.25e-05	4.59e-05	5.34e-05	0	1.76e-05	0.00013067	9.22e-05	4.09e-05	0	4.61e-05	0	0	0	0	0	0	0	0	0	Eukaryota	Eukaryota_unclassified	Eukaryota_unclassified	Eukaryota_unclassified	Eukaryota_unclassified	Eukaryota_unclassified	Eukaryota_unclassified	Eukaryota_unclassified
OTU_1690	0	0	0	0	0	0	0	0	0	0	0	0	0	0	0	0	0	0	5.92e-05	0	0	0	0	0	4.61e-05	0	0	0	0	5.39e-05	0.000462733	0	0	0.000176939	Eukaryota	Eukaryota_unclassified	Eukaryota_unclassified	Eukaryota_unclassified	Eukaryota_unclassified	Eukaryota_unclassified	Eukaryota_unclassified	Eukaryota_unclassified
OTU_3177	0	0	0	0	0	0	0	0	0	0	0	0	0	0	0	0	0	0	0	0	0	0	0	0	1.54e-05	0	0	0	0	0	0.0013882	0	0	0	Eukaryota	Eukaryota_unclassified	Eukaryota_unclassified	Eukaryota_unclassified	Eukaryota_unclassified	Eukaryota_unclassified	Eukaryota_unclassified	Eukaryota_unclassified
OTU_3572	0	0	0	0	0	0	0	0	0	0	0	0	0	0	0	0	0.000214169	0.000444848	0.000611874	3.53e-05	0.00728846	9.22e-05	0.000191069	0	7.68e-05	1.46e-05	0	0	0	0	0	0	0	0	Eukaryota	Eukaryota_unclassified	Eukaryota_unclassified	Eukaryota_unclassified	Eukaryota_unclassified	Eukaryota_unclassified	Eukaryota_unclassified	Eukaryota_unclassified
OTU_13279	0	0	0	8.8e-06	2.72e-05	0	0	0	0	0	0	0	0	0	0	0	0	0	0	3.53e-05	0	0	4.09e-05	0	9.22e-05	1.46e-05	0	0	0.000351309	0	0	0	0	0	Eukaryota	Eukaryota_unclassified	Eukaryota_unclassified	Eukaryota_unclassified	Eukaryota_unclassified	Eukaryota_unclassified	Eukaryota_unclassified	Eukaryota_unclassified
OTU_2889	0	0	0	0	0	0	0	0	0	0	0	0	0	0	0	0	0	1.78e-05	0	0	0.000580754	0	0	0	1.54e-05	1.46e-05	2.04e-05	0	0	0	0	0	0	0	Eukaryota	Eukaryota_unclassified	Eukaryota_unclassified	Eukaryota_unclassified	Eukaryota_unclassified	Eukaryota_unclassified	Eukaryota_unclassified	Eukaryota_unclassified
OTU_6732	0	0	0	0	0	0	0	0	0	0	0	0	0	0	0	0	0	0	0	0	0	0	2.73e-05	0	1.54e-05	1.46e-05	0	0	0.000386439	0	0	0	4.45e-05	0	Eukaryota	Eukaryota_unclassified	Eukaryota_unclassified	Eukaryota_unclassified	Eukaryota_unclassified	Eukaryota_unclassified	Eukaryota_unclassified	Eukaryota_unclassified
OTU_8133	0	0	0	0	0	0	0	0	0	0	0	0	0	0	0	0	0	0	0	0	0	0	0	0.000376559	0	0	0	0	0	0	0	0	0	0	Eukaryota	Eukaryota_unclassified	Eukaryota_unclassified	Eukaryota_unclassified	Eukaryota_unclassified	Eukaryota_unclassified	Eukaryota_unclassified	Eukaryota_unclassified
OTU_3476	0	0	0	0	0	0	0	0	0	0	0	0	0	0	0	0	1.53e-05	3.56e-05	9.87e-05	0	0.000159707	0	1.36e-05	7.06e-05	0	0	0	0	0	0	0	0	0	0	Eukaryota	Eukaryota_unclassified	Eukaryota_unclassified	Eukaryota_unclassified	Eukaryota_unclassified	Eukaryota_unclassified	Eukaryota_unclassified	Eukaryota_unclassified
OTU_3521	0	0	0	0	0	0	0	0	0	0	0	0	0	0	0	0	0	0	0	0	0	0	0	0	0	0	0	0	0	0	0	0	0	0.000383368	Eukaryota	Eukaryota_unclassified	Eukaryota_unclassified	Eukaryota_unclassified	Eukaryota_unclassified	Eukaryota_unclassified	Eukaryota_unclassified	Eukaryota_unclassified
OTU_2479	0	0	0	0	0	0	0	0	0	0	0	0	0	0	0	0	0	0	0	0	0	0	0	0	0	0	0	0	0	0	0	0	0	0.000604541	Eukaryota	Eukaryota_unclassified	Eukaryota_unclassified	Eukaryota_unclassified	Eukaryota_unclassified	Eukaryota_unclassified	Eukaryota_unclassified	Eukaryota_unclassified
OTU_1697	0	0	0	0	0	0	0	0	0	0	0	0	0	0	0	0	0	0	0	0	0	0	1.36e-05	2.35e-05	1.54e-05	2.92e-05	2.04e-05	0.0120106	0	0	0	0.00305121	0	0.00176939	Eukaryota	Eukaryota_unclassified	Eukaryota_unclassified	Eukaryota_unclassified	Eukaryota_unclassified	Eukaryota_unclassified	Eukaryota_unclassified	Eukaryota_unclassified
OTU_2643	0	0	0	0	0	0	0	0	0	0	0	0	0	0	0	0	0	0	0	0	0	0	0	0	0	0	0	0.00162081	0	0	0	0.000578948	1.48e-05	0.000265408	Eukaryota	Eukaryota_unclassified	Eukaryota_unclassified	Eukaryota_unclassified	Eukaryota_unclassified	Eukaryota_unclassified	Eukaryota_unclassified	Eukaryota_unclassified
OTU_2778	0	0	0	0	0	0	0	0	0	0	0	0	0	0	0	0	0	0	0	0	0	0	0	0	0	0	0	0	0	0	0	0	0	0.000457092	Eukaryota	Eukaryota_unclassified	Eukaryota_unclassified	Eukaryota_unclassified	Eukaryota_unclassified	Eukaryota_unclassified	Eukaryota_unclassified	Eukaryota_unclassified
OTU_1941	0	0	0	0	0	0	0	0	0	0	0	0	0	0	0	0	0	0	0	0	0	0	0	0	0	0	0	0	0	0	0	0	0	0.00100265	Eukaryota	Eukaryota_unclassified	Eukaryota_unclassified	Eukaryota_unclassified	Eukaryota_unclassified	Eukaryota_unclassified	Eukaryota_unclassified	Eukaryota_unclassified
OTU_2924	0	0	0	0	0	0	0	0	0	0	0	0	0	0	0	0	0	3.56e-05	0	0	0	1.54e-05	0	0	0	0	0	0	0	0	0	0	0	0.000206429	Eukaryota	Eukaryota_unclassified	Eukaryota_unclassified	Eukaryota_unclassified	Eukaryota_unclassified	Eukaryota_unclassified	Eukaryota_unclassified	Eukaryota_unclassified
OTU_2987	0	0	0	0	0	0	0	0	0	0	0	0	0	0	0	0	0	0	7.9e-05	0	0	0	0	0	0	0	0	0	0	0	0	0	0	0.000442347	Eukaryota	Eukaryota_unclassified	Eukaryota_unclassified	Eukaryota_unclassified	Eukaryota_unclassified	Eukaryota_unclassified	Eukaryota_unclassified	Eukaryota_unclassified
OTU_1638	0	0	0	0	0	0	0	0	0	0	0	0	0	0	0	0	0	0	0	0	0	0	0	0	0	0	0	0	0	0	0	0	0.00197479	0	Eukaryota	Eukaryota_unclassified	Eukaryota_unclassified	Eukaryota_unclassified	Eukaryota_unclassified	Eukaryota_unclassified	Eukaryota_unclassified	Eukaryota_unclassified
OTU_3087	0	0	0	0	0	0	0	0	0	0	0	0	0	0	0	0	0	0	0	0	0	0	0	0	0	0	0	0	0	0	0	0	0.000861186	0	Eukaryota	Eukaryota_unclassified	Eukaryota_unclassified	Eukaryota_unclassified	Eukaryota_unclassified	Eukaryota_unclassified	Eukaryota_unclassified	Eukaryota_unclassified
OTU_2454	0	0	0	0	0	0	0	0	0	0	0	0	0	0	0	0	0	0	0	0	0	0	0	0	0	0	0	0	0	0	0	0	0.000772098	0	Eukaryota	Eukaryota_unclassified	Eukaryota_unclassified	Eukaryota_unclassified	Eukaryota_unclassified	Eukaryota_unclassified	Eukaryota_unclassified	Eukaryota_unclassified
OTU_4990	0	0	0	0	0	0	0	0	0	0	0	0	0	0	0	0	0	0	0	0	0	0	0	0	0	0	0	0	0	0	0	0	0.00083149	0	Eukaryota	Eukaryota_unclassified	Eukaryota_unclassified	Eukaryota_unclassified	Eukaryota_unclassified	Eukaryota_unclassified	Eukaryota_unclassified	Eukaryota_unclassified
OTU_2809	0	0	0	0	0	0	0	0	0	0	0	0	0	0	0	0	0	0	0	0	1.45e-05	0	0	0	0	0	0	0	0	0.00142849	0	0	0.000504833	0	Eukaryota	Eukaryota_unclassified	Eukaryota_unclassified	Eukaryota_unclassified	Eukaryota_unclassified	Eukaryota_unclassified	Eukaryota_unclassified	Eukaryota_unclassified
OTU_2922	0	0	0	0	0	0	0	0	0	0	0	0	0	0	0	0	0	0	0	0	0	0	0	0	0	0	0	0	0	0	0	0	0.000489985	0	Eukaryota	Eukaryota_unclassified	Eukaryota_unclassified	Eukaryota_unclassified	Eukaryota_unclassified	Eukaryota_unclassified	Eukaryota_unclassified	Eukaryota_unclassified
OTU_3141	0	0	0	1.76e-05	0	0	0	0	0	0	0	0	0	0	0	0	0	0	0	0	0	0	0	0	0	0	0	0	0	0	0	0	0.000519681	0	Eukaryota	Eukaryota_unclassified	Eukaryota_unclassified	Eukaryota_unclassified	Eukaryota_unclassified	Eukaryota_unclassified	Eukaryota_unclassified	Eukaryota_unclassified
OTU_11673	0	0	0	0	0	0	0	0	0	0	0	0	0	0	0	0.000135254	0.00174395	0	0	0	0	0	0	0	0	0	0	0	0	0	0	0	0	0	Eukaryota	Eukaryota_unclassified	Eukaryota_unclassified	Eukaryota_unclassified	Eukaryota_unclassified	Eukaryota_unclassified	Eukaryota_unclassified	Eukaryota_unclassified
OTU_3660	0	0	0	0	0	0	0	0	0	0	0	0	0	0	0	0	9.18e-05	8.9e-05	7.9e-05	1.76e-05	0.000421047	1.54e-05	8.19e-05	0	0	0	0	0	0	0	0	0	0	0	Eukaryota	Eukaryota_unclassified	Eukaryota_unclassified	Eukaryota_unclassified	Eukaryota_unclassified	Eukaryota_unclassified	Eukaryota_unclassified	Eukaryota_unclassified
OTU_3635	0	0	0	0	0	0	0	0	0	0	0	0	0	0	0	0	0.00041304	1.78e-05	0	1.76e-05	4.36e-05	1.54e-05	0	0	0	0	0	0	0	0	0	0	0	0	Eukaryota	Eukaryota_unclassified	Eukaryota_unclassified	Eukaryota_unclassified	Eukaryota_unclassified	Eukaryota_unclassified	Eukaryota_unclassified	Eukaryota_unclassified
OTU_4112	0	0	0	0	0	0	0	0	0	0	0	0	0	0	0	0.000428304	0.00013768	0	0	0	0	0	0	0	0	0	0	0	0	0	0	0	0	0	Eukaryota	Eukaryota_unclassified	Eukaryota_unclassified	Eukaryota_unclassified	Eukaryota_unclassified	Eukaryota_unclassified	Eukaryota_unclassified	Eukaryota_unclassified
OTU_4049	0	0	0	0	0	0	0	0	0	0	0	0	0	0	0	0	4.59e-05	7.12e-05	9.87e-05	0	0.000159707	1.54e-05	2.73e-05	0	0	0	0	0	0	0	0	0	0	0	Eukaryota	Eukaryota_unclassified	Eukaryota_unclassified	Eukaryota_unclassified	Eukaryota_unclassified	Eukaryota_unclassified	Eukaryota_unclassified	Eukaryota_unclassified
OTU_13348	0	0	0	0	0	0	0	0	0	0	0	0	0	0	0	0	0.000198871	0.000480436	0.000532923	0	0	0	0	0	0	0	0	0	0	0	0	0	0	0	Eukaryota	Eukaryota_unclassified	Eukaryota_unclassified	Eukaryota_unclassified	Eukaryota_unclassified	Eukaryota_unclassified	Eukaryota_unclassified	Eukaryota_unclassified
OTU_7189	0	0	0	0	0	0	0	0	0	0	0	0	0	0	0	0.000360677	1.53e-05	0	0	0	0	0	0	0	0	0	0	0	0	0	0	0	0	0	Eukaryota	Eukaryota_unclassified	Eukaryota_unclassified	Eukaryota_unclassified	Eukaryota_unclassified	Eukaryota_unclassified	Eukaryota_unclassified	Eukaryota_unclassified
OTU_3552	0	0	0	0	0	0	0	0	0	0	0	0	0	0	0	0	1.53e-05	0	0	0	0.000595273	0	0	0	0	0	0	0	0	0	0	0	0	0	Eukaryota	Eukaryota_unclassified	Eukaryota_unclassified	Eukaryota_unclassified	Eukaryota_unclassified	Eukaryota_unclassified	Eukaryota_unclassified	Eukaryota_unclassified
OTU_12941	0	0	0	0	0	0	0	0	0	0	0	0	0	0	0	0	0	0.00032029	0.000296068	0	0	0	0	0	0	0	0	0	0	0	0	0	0	0	Eukaryota	Eukaryota_unclassified	Eukaryota_unclassified	Eukaryota_unclassified	Eukaryota_unclassified	Eukaryota_unclassified	Eukaryota_unclassified	Eukaryota_unclassified
OTU_4690	0	0	0	0	0	0	0	0	0	0	0	0	0	0	0	0	0	1.78e-05	3.95e-05	0	0	0	0	0	0	0	0	0.000124678	0	0	0	0	0	0	Eukaryota	Eukaryota_unclassified	Eukaryota_unclassified	Eukaryota_unclassified	Eukaryota_unclassified	Eukaryota_unclassified	Eukaryota_unclassified	Eukaryota_unclassified
OTU_7526	0	0	2.1e-05	8.8e-06	0	0	0	0	0	0	0	0	0	0	0	0	0	0	5.92e-05	8.82e-05	0	1.54e-05	0.000150126	0	4.61e-05	0	2.04e-05	0	0.000245916	0	0	0	0	2.95e-05	Eukaryota	Eukaryota_unclassified	Eukaryota_unclassified	Eukaryota_unclassified	Eukaryota_unclassified	Eukaryota_unclassified	Eukaryota_unclassified	Eukaryota_unclassified
OTU_1935	0	0	0	0	0	0	0	0	0	0	0	0	0	0	0	0	0	0	0	0	0	0.00109127	0	0	0	0	0	0	0	0	0	0	0	0	Eukaryota	Eukaryota_unclassified	Eukaryota_unclassified	Eukaryota_unclassified	Eukaryota_unclassified	Eukaryota_unclassified	Eukaryota_unclassified	Eukaryota_unclassified
OTU_7457	0	0	0	0	0	0	0	0	0	0	0	0	0	0	0	0	0	0	0	8.82e-05	2.9e-05	4.61e-05	2.73e-05	0	3.07e-05	0	0	0	0.000140523	0	0	0	0	4.42e-05	Eukaryota	Eukaryota_unclassified	Eukaryota_unclassified	Eukaryota_unclassified	Eukaryota_unclassified	Eukaryota_unclassified	Eukaryota_unclassified	Eukaryota_unclassified
OTU_1737	0	0	0	0	0	0	0	0	0	0	0	0	0	0	0	0	0	0	0	0	0	0	0	0	0	0	0	0	0	0	0	0	0	0	Eukaryota	Eukaryota_unclassified	Eukaryota_unclassified	Eukaryota_unclassified	Eukaryota_unclassified	Eukaryota_unclassified	Eukaryota_unclassified	Eukaryota_unclassified
OTU_3736	0	0	0	0	0	0	0	0	0	0	0	0	0	0	0	0	0	0	0	0	0	0	0	0	0	0	0	0	0	0	0	0	0	0	Eukaryota	Eukaryota_unclassified	Eukaryota_unclassified	Eukaryota_unclassified	Eukaryota_unclassified	Eukaryota_unclassified	Eukaryota_unclassified	Eukaryota_unclassified
OTU_9259	0	0	0	0	0	0	0	0	0	0	0	0	0	0	0	0	0	0	0	0	0	0	0	0	0	0	0	0	0	0	0	0	0	0	Eukaryota	Eukaryota_unclassified	Eukaryota_unclassified	Eukaryota_unclassified	Eukaryota_unclassified	Eukaryota_unclassified	Eukaryota_unclassified	Eukaryota_unclassified
OTU_1824	0	0	0	0	0	0	0	0	0	0	0	0	0	0	0	0	0	0	0	0	0	0	0	0	0	0	0	0	0	0	0	0	0	0	Eukaryota	Eukaryota_unclassified	Eukaryota_unclassified	Eukaryota_unclassified	Eukaryota_unclassified	Eukaryota_unclassified	Eukaryota_unclassified	Eukaryota_unclassified
OTU_2979	0	0	0	0	0	0	0	0	0	0	0	0	0	0	0	0	0	0	0	0	0	0	0	0	0	0	0	0	0	0	0	0	0	0	Eukaryota	Eukaryota_unclassified	Eukaryota_unclassified	Eukaryota_unclassified	Eukaryota_unclassified	Eukaryota_unclassified	Eukaryota_unclassified	Eukaryota_unclassified
OTU_4542	0	0	0	0	0	0	0	0	0	0	0	0	0	0	0	0	0	0	0	0	0	0	0	0	0	0	0	0	0	0	0	0	0	0	Eukaryota	Eukaryota_unclassified	Eukaryota_unclassified	Eukaryota_unclassified	Eukaryota_unclassified	Eukaryota_unclassified	Eukaryota_unclassified	Eukaryota_unclassified
OTU_2592	0	0	0	0	0	0	0	0	0	0	0	0	0	0	0	0	0	0	0	0	0	0	0	0	0	0	0	0	0	0	0	0	0	0	Eukaryota	Eukaryota_unclassified	Eukaryota_unclassified	Eukaryota_unclassified	Eukaryota_unclassified	Eukaryota_unclassified	Eukaryota_unclassified	Eukaryota_unclassified
OTU_2823	0	0	0	0	0	0	0	0	0	0	0	0	0	0	0	0	0	0	0	0	0	0	0	0	0	0	0	0	0	0	0	0	0	0	Eukaryota	Eukaryota_unclassified	Eukaryota_unclassified	Eukaryota_unclassified	Eukaryota_unclassified	Eukaryota_unclassified	Eukaryota_unclassified	Eukaryota_unclassified
OTU_3590	0	0	0	0	0	0	0	0	0	0	0	0	0	0	0	0	0	0	0	0	0	0	0	0	0	0	0	0	0	0	0	0	0	0	Eukaryota	Eukaryota_unclassified	Eukaryota_unclassified	Eukaryota_unclassified	Eukaryota_unclassified	Eukaryota_unclassified	Eukaryota_unclassified	Eukaryota_unclassified
OTU_2874	0	0	0	0	0	0	0	0	0	0	0	0	0	0	0	0	0	0	0	0	0	0	0	0	0	0	0	0	0	0	0	0	0	0	Eukaryota	Eukaryota_unclassified	Eukaryota_unclassified	Eukaryota_unclassified	Eukaryota_unclassified	Eukaryota_unclassified	Eukaryota_unclassified	Eukaryota_unclassified
OTU_2883	0	0	0	0	0	0	0	0	0	0	0	0	0	0	0	0	0	0	0	0	0	0	0	9.41e-05	0	0	0	0	0	0.000188669	0.00013221	0	0	0	Eukaryota	Eukaryota_unclassified	Eukaryota_unclassified	Eukaryota_unclassified	Eukaryota_unclassified	Eukaryota_unclassified	Eukaryota_unclassified	Eukaryota_unclassified
OTU_2167	0	0	0	0	0	0	0	0	0	0	0	0	0	0	0	0	0	0	0	0	0	0	0	0	0	0	0	0	0	0.00304566	0	0	0	0	Eukaryota	Eukaryota_unclassified	Eukaryota_unclassified	Eukaryota_unclassified	Eukaryota_unclassified	Eukaryota_unclassified	Eukaryota_unclassified	Eukaryota_unclassified
OTU_3449	0	0	0	0	0	0	0	0	0	0	0	0	0	0	0	0	0	0	0	0	0	0	0	0	0	0	0	0.00116366	0	0	0	0	0	0	Eukaryota	Eukaryota_unclassified	Eukaryota_unclassified	Eukaryota_unclassified	Eukaryota_unclassified	Eukaryota_unclassified	Eukaryota_unclassified	Eukaryota_unclassified
OTU_3609	0	0	0	0	0	0	0	0	0	0	0	0	0	0	0	0	0	0	0	0	0	0	0	0	0	0	0	0.000997423	0	0	0	0	0	0	Eukaryota	Eukaryota_unclassified	Eukaryota_unclassified	Eukaryota_unclassified	Eukaryota_unclassified	Eukaryota_unclassified	Eukaryota_unclassified	Eukaryota_unclassified
OTU_1388	0	0	0	0	0	0	0	0	0	0	0	0	0	0	0	0	0	0	0	0	0	0	0	0	0	0	0	0.00893525	0	0	0	0	0	0	Eukaryota	Eukaryota_unclassified	Eukaryota_unclassified	Eukaryota_unclassified	Eukaryota_unclassified	Eukaryota_unclassified	Eukaryota_unclassified	Eukaryota_unclassified
OTU_3654	0	0	0	0	0	0	0	0	0	0	0	0	0	0	0	0	0	0	0	0	0	0	0	0	0	0	0	0.00203641	0	0	0	0	0	0	Eukaryota	Eukaryota_unclassified	Eukaryota_unclassified	Eukaryota_unclassified	Eukaryota_unclassified	Eukaryota_unclassified	Eukaryota_unclassified	Eukaryota_unclassified
OTU_2797	0	0	0	0	0	0	0	0	0	0	0	0	0	0	0	0	0	0	0	0	0	0	0	0	0	0	0	0.00166237	0	0	0	0	0	0	Eukaryota	Eukaryota_unclassified	Eukaryota_unclassified	Eukaryota_unclassified	Eukaryota_unclassified	Eukaryota_unclassified	Eukaryota_unclassified	Eukaryota_unclassified
OTU_2211	0	0	0	0	0	0	0	0	0	0	0	0	0	0	0	0	0	0	0	0	0	0	0	0	0	0	0	0.00191173	0	0	0	0	0	0	Eukaryota	Eukaryota_unclassified	Eukaryota_unclassified	Eukaryota_unclassified	Eukaryota_unclassified	Eukaryota_unclassified	Eukaryota_unclassified	Eukaryota_unclassified
OTU_3178	0	0	0	0	0	0	0	0	0	0	0	0	0	0	0	0	0	0	0	0	0	0	0	0	0	0	0	0.000748067	0	0	0	0	0	0	Eukaryota	Eukaryota_unclassified	Eukaryota_unclassified	Eukaryota_unclassified	Eukaryota_unclassified	Eukaryota_unclassified	Eukaryota_unclassified	Eukaryota_unclassified
OTU_7881	0	0	0	0	0	0	0	0	0	0	0	0	0	0	0	0	0	0	0	0	0	0	0	0	0	0	0	0	0	0	0	0.00245662	0	0	Eukaryota	Eukaryota_unclassified	Eukaryota_unclassified	Eukaryota_unclassified	Eukaryota_unclassified	Eukaryota_unclassified	Eukaryota_unclassified	Eukaryota_unclassified
OTU_2349	0	0	0	0	0	0	0	0	0	0	0	0	0	0	0	0	0	0	0	0	0	0	0	0	0	0	0	0	0	0	0	0.00389617	0	0	Eukaryota	Eukaryota_unclassified	Eukaryota_unclassified	Eukaryota_unclassified	Eukaryota_unclassified	Eukaryota_unclassified	Eukaryota_unclassified	Eukaryota_unclassified
OTU_1608	0	0	0	0	0	0	0	0	0	0	0	0	0	0	0	0	0	0	0	0	0	0	0	0	0	0	0	0	0	0	0	0.00237838	0	0	Eukaryota	Eukaryota_unclassified	Eukaryota_unclassified	Eukaryota_unclassified	Eukaryota_unclassified	Eukaryota_unclassified	Eukaryota_unclassified	Eukaryota_unclassified
OTU_3139	0	0	0	0	0	0	0	0	0	0	0	0	0	0	0	0	0	0	0	0	0	0	0	0	0	0	0	0	0	0	0	0.00045377	0	0	Eukaryota	Eukaryota_unclassified	Eukaryota_unclassified	Eukaryota_unclassified	Eukaryota_unclassified	Eukaryota_unclassified	Eukaryota_unclassified	Eukaryota_unclassified
OTU_2742	0	0	0	0	0	0	0	0	0	0	0	0	0	0	0	0	0	0	0	0	0	0	0	0	0	0	0	0	0	0	0	0.00147084	0	0	Eukaryota	Eukaryota_unclassified	Eukaryota_unclassified	Eukaryota_unclassified	Eukaryota_unclassified	Eukaryota_unclassified	Eukaryota_unclassified	Eukaryota_unclassified
OTU_2897	0	0	0	0	0	0	0	0	0	0	0	0	0	0	0	0	0	0	0	0	0	0	0	0	0	0	0	0	0	0	0	0.00103272	0	0	Eukaryota	Eukaryota_unclassified	Eukaryota_unclassified	Eukaryota_unclassified	Eukaryota_unclassified	Eukaryota_unclassified	Eukaryota_unclassified	Eukaryota_unclassified
OTU_3599	0	0	0	0	0	0	0	0	0	0	0	0	0	0	0	0	0	0	0	0	0	0	0	0	0	0	0	0	0	0	0	0.000516359	0	0	Eukaryota	Eukaryota_unclassified	Eukaryota_unclassified	Eukaryota_unclassified	Eukaryota_unclassified	Eukaryota_unclassified	Eukaryota_unclassified	Eukaryota_unclassified
OTU_4767	0	0	0	0	0	0	0	0	0	0	0	0	0	0	0	0	0	0	0	0	0	0	0	0	0	0	0	0	0	0	0.000495786	0	0	0	Eukaryota	Eukaryota_unclassified	Eukaryota_unclassified	Eukaryota_unclassified	Eukaryota_unclassified	Eukaryota_unclassified	Eukaryota_unclassified	Eukaryota_unclassified
OTU_3143	0	0	0	0	0	0	0	0	0	0	0	0	0	0	0	0	0	0	0	0	0	0	0	0	0	0	0	0	0	0	0.00168567	0	0	0	Eukaryota	Eukaryota_unclassified	Eukaryota_unclassified	Eukaryota_unclassified	Eukaryota_unclassified	Eukaryota_unclassified	Eukaryota_unclassified	Eukaryota_unclassified
OTU_4699	0	0	0	0	0	0	0	0	0	0	0	0	0	0	0	0	0	0	0	0	0	0	0	0	0	0	0	0	0	0	0.000561891	0	0	0	Eukaryota	Eukaryota_unclassified	Eukaryota_unclassified	Eukaryota_unclassified	Eukaryota_unclassified	Eukaryota_unclassified	Eukaryota_unclassified	Eukaryota_unclassified
OTU_2668	0	0	0	0	0	0	0	0	0	0	0	0	0	0	0	0	0	0	0	0	0	0	0	0	0	0	0	0	0	0	0.00115683	0	0	0	Eukaryota	Eukaryota_unclassified	Eukaryota_unclassified	Eukaryota_unclassified	Eukaryota_unclassified	Eukaryota_unclassified	Eukaryota_unclassified	Eukaryota_unclassified
OTU_8153	0	0	0	0	0	0	0	0	0	0	0	0	0	0	0	0	0	0	0	0	0	0	0	0	0	0	0	0	0	0	0.000363576	0	0	0	Eukaryota	Eukaryota_unclassified	Eukaryota_unclassified	Eukaryota_unclassified	Eukaryota_unclassified	Eukaryota_unclassified	Eukaryota_unclassified	Eukaryota_unclassified
OTU_3402	0	0	0	0	0	0	0	0	0	0	0	0	0	0	0	0	0	0	0	0	0	0	0	0.00230642	0	0	0	0	0	0	0	0	0	0	Eukaryota	Eukaryota_unclassified	Eukaryota_unclassified	Eukaryota_unclassified	Eukaryota_unclassified	Eukaryota_unclassified	Eukaryota_unclassified	Eukaryota_unclassified
OTU_1341	0	0	0	0	0	0	0	0	0	0	0	0	0	0	0	0	0	0	0	0	0	0	0	0.00320075	0	0	0	0	0	0	0	0	0	0	Eukaryota	Eukaryota_unclassified	Eukaryota_unclassified	Eukaryota_unclassified	Eukaryota_unclassified	Eukaryota_unclassified	Eukaryota_unclassified	Eukaryota_unclassified
OTU_2910	0	0	0	0	0	0	0	0	0	0	0	0	0	0	0	0	0	0	0	0	0	0	0	0.00482466	0	0	0	0	0	0	0	0	0	0	Eukaryota	Eukaryota_unclassified	Eukaryota_unclassified	Eukaryota_unclassified	Eukaryota_unclassified	Eukaryota_unclassified	Eukaryota_unclassified	Eukaryota_unclassified
OTU_969	0	0	0	0	0	0	0	0	0	0	0	0	0	0	0	0	0	0	0	0	0	0	0	0.00216521	0	0	0	0	0	0	0	0	0	0	Eukaryota	Eukaryota_unclassified	Eukaryota_unclassified	Eukaryota_unclassified	Eukaryota_unclassified	Eukaryota_unclassified	Eukaryota_unclassified	Eukaryota_unclassified
OTU_4920	0	0	0	0	0	0	0	0	0	0	0	0	0	0	0	0.000338135	6.12e-05	0	0	0	0	0	0	0	0	0	0	0	0	0	0	0	0	0	Eukaryota	Eukaryota_unclassified	Eukaryota_unclassified	Eukaryota_unclassified	Eukaryota_unclassified	Eukaryota_unclassified	Eukaryota_unclassified	Eukaryota_unclassified
OTU_3784	0	0	0	0	0	0	0	0	0	0	0	0	0	0	0	0.000383219	0	1.78e-05	0	0	0	0	0	0	0	0	0	0	0	0	0	0	0	0	Eukaryota	Eukaryota_unclassified	Eukaryota_unclassified	Eukaryota_unclassified	Eukaryota_unclassified	Eukaryota_unclassified	Eukaryota_unclassified	Eukaryota_unclassified
OTU_4181	0	0	0	0	0	0	0	0	0	0	0	0	0	0	0	0.000518473	0	0	0	0	0	0	0	0	0	0	0	0	0	0	0	0	0	0	Eukaryota	Eukaryota_unclassified	Eukaryota_unclassified	Eukaryota_unclassified	Eukaryota_unclassified	Eukaryota_unclassified	Eukaryota_unclassified	Eukaryota_unclassified
OTU_3752	0	0	0	0	0	0	0	0	0	0	0	0	0	0	0	0.00067627	0	0	0	0	0	0	0	0	0	0	0	0	0	0	0	0	0	0	Eukaryota	Eukaryota_unclassified	Eukaryota_unclassified	Eukaryota_unclassified	Eukaryota_unclassified	Eukaryota_unclassified	Eukaryota_unclassified	Eukaryota_unclassified
OTU_5176	0	0	0	0	0	0	0	0	0	0	0	0	0	0	0	0.000450846	0	0	0	0	0	0	0	0	0	0	0	0	0	0	0	0	0	0	Eukaryota	Eukaryota_unclassified	Eukaryota_unclassified	Eukaryota_unclassified	Eukaryota_unclassified	Eukaryota_unclassified	Eukaryota_unclassified	Eukaryota_unclassified
OTU_5410	0	0	0	0	0	0	0	0	0	0	0	0	0	0	0	0.000405762	0	0	0	0	0	0	0	0	0	0	0	0	0	0	0	0	0	0	Eukaryota	Eukaryota_unclassified	Eukaryota_unclassified	Eukaryota_unclassified	Eukaryota_unclassified	Eukaryota_unclassified	Eukaryota_unclassified	Eukaryota_unclassified
OTU_3758	0	0	0	0	0	0	0	0	0	0	0	0	0	0	0	0.000541016	0	0	0	0	0	0	0	0	0	0	0	0	0	0	0	0	0	0	Eukaryota	Eukaryota_unclassified	Eukaryota_unclassified	Eukaryota_unclassified	Eukaryota_unclassified	Eukaryota_unclassified	Eukaryota_unclassified	Eukaryota_unclassified
OTU_15420	0	0	0	0	0	0	0	0	0	0	0	0	0	0	0	0.000428304	0	0	0	0	0	0	0	0	0	0	0	0	0	0	0	0	0	0	Eukaryota	Eukaryota_unclassified	Eukaryota_unclassified	Eukaryota_unclassified	Eukaryota_unclassified	Eukaryota_unclassified	Eukaryota_unclassified	Eukaryota_unclassified
OTU_4680	0	0	0	0	0	0	0	0	0	0	0	0	0	0	0	0.000405762	0	0	0	0	0	0	0	0	0	0	0	0	0	0	0	0	0	0	Eukaryota	Eukaryota_unclassified	Eukaryota_unclassified	Eukaryota_unclassified	Eukaryota_unclassified	Eukaryota_unclassified	Eukaryota_unclassified	Eukaryota_unclassified
OTU_3874	0	0	0	0	0	0	0	0	0	0	0	0	0	0	0	0.000428304	0	0	0	0	0	0	0	0	0	0	0	0	0	0	0	0	0	0	Eukaryota	Eukaryota_unclassified	Eukaryota_unclassified	Eukaryota_unclassified	Eukaryota_unclassified	Eukaryota_unclassified	Eukaryota_unclassified	Eukaryota_unclassified
OTU_4388	0	0	0	0	0	0	0	0	0	0	0	0	0	0	0	0.000383219	0	0	0	0	0	0	0	0	0	0	0	0	0	0	0	0	0	0	Eukaryota	Eukaryota_unclassified	Eukaryota_unclassified	Eukaryota_unclassified	Eukaryota_unclassified	Eukaryota_unclassified	Eukaryota_unclassified	Eukaryota_unclassified
OTU_7588	0	0	0	0	0	0	0	0	0	0	0	0	0	0	0	0.000360677	0	0	0	0	0	0	0	0	0	0	0	0	0	0	0	0	0	0	Eukaryota	Eukaryota_unclassified	Eukaryota_unclassified	Eukaryota_unclassified	Eukaryota_unclassified	Eukaryota_unclassified	Eukaryota_unclassified	Eukaryota_unclassified
OTU_2818	0	0	0	0	0	0	0	0	0	0	0	0	0	0	0	2.25e-05	0	0	0	0	0	0	0	0	0	0	0	0	0	0.00169802	0	0	0	0	Eukaryota	Eukaryota_unclassified	Eukaryota_unclassified	Eukaryota_unclassified	Eukaryota_unclassified	Eukaryota_unclassified	Eukaryota_unclassified	Eukaryota_unclassified
OTU_9518	0	0.000289977	2.1e-05	5.28e-05	0	0	0	0	0	0	0	0	0	0	0	2.25e-05	0	0	0	0	0	0	0	0	0	0	0	0	0	0	0	0	0	0	Eukaryota	Eukaryota_unclassified	Eukaryota_unclassified	Eukaryota_unclassified	Eukaryota_unclassified	Eukaryota_unclassified	Eukaryota_unclassified	Eukaryota_unclassified
OTU_3094	0	0	0	0	0	0	0	0	0	0	0	0	0	0	0	0	0	0	0	0	0	0	0	0	0	0	0	0	0	0	0	0	0	0	Eukaryota	Eukaryota_unclassified	Eukaryota_unclassified	Eukaryota_unclassified	Eukaryota_unclassified	Eukaryota_unclassified	Eukaryota_unclassified	Eukaryota_unclassified
OTU_3145	0	0	0	0	0	0	0	0	0	0	0	0	0	0	0	0	0	0	0	0	0	0	0	0	0	0	0	0.00423905	0	0	0	0	0	0	Eukaryota	Eukaryota_unclassified	Eukaryota_unclassified	Eukaryota_unclassified	Eukaryota_unclassified	Eukaryota_unclassified	Eukaryota_unclassified	Eukaryota_unclassified
OTU_4549	0	0	0	0	0	0	0	0	0	0	0	0	0	0	0	0	0	0	0	0	0	0	0	0	0	0	0	0	0	0.000539054	0	0	0	0	Eukaryota	Eukaryota_unclassified	Eukaryota_unclassified	Eukaryota_unclassified	Eukaryota_unclassified	Eukaryota_unclassified	Eukaryota_unclassified	Eukaryota_unclassified
OTU_2010	0	0	0	0	0	0	0	0	0	0	0	0	0	0	0	0	0	0	0	0	0	0	0	0	0	0	0	0	0	0.0128834	0	0	0	0	Eukaryota	Eukaryota_unclassified	Eukaryota_unclassified	Eukaryota_unclassified	Eukaryota_unclassified	Eukaryota_unclassified	Eukaryota_unclassified	Eukaryota_unclassified
OTU_1735	0	0	0	0	0	0	0	0	0	0	0	0	0	0	0	0	0	0	0	0	0	0	0	0	0	0	0	0	0	0.0231254	0	0	0	0	Eukaryota	Eukaryota_unclassified	Eukaryota_unclassified	Eukaryota_unclassified	Eukaryota_unclassified	Eukaryota_unclassified	Eukaryota_unclassified	Eukaryota_unclassified
OTU_3075	0	0	0	0	0	0	0	0	0	0	0	0	0	0	0	0	0	0	0	0	0	0	0	0	0	0	0	0	0	0.0170341	0	0	0	0	Eukaryota	Eukaryota_unclassified	Eukaryota_unclassified	Eukaryota_unclassified	Eukaryota_unclassified	Eukaryota_unclassified	Eukaryota_unclassified	Eukaryota_unclassified
OTU_7941	0	0	0	0	0	0	0	0	0	0	0	0	0	0	0	0	0	0	0	0	0	0	0	0	0	0	0	0	0	0.000404291	0	0	0	0	Eukaryota	Eukaryota_unclassified	Eukaryota_unclassified	Eukaryota_unclassified	Eukaryota_unclassified	Eukaryota_unclassified	Eukaryota_unclassified	Eukaryota_unclassified
OTU_2350	0	0	0	0	0	0	0	0	0	0	0	0	0	0	0	0	0	0	0	0	0	0	0	0	0	0	0	0	0	0.00242574	0	0	0	0	Eukaryota	Eukaryota_unclassified	Eukaryota_unclassified	Eukaryota_unclassified	Eukaryota_unclassified	Eukaryota_unclassified	Eukaryota_unclassified	Eukaryota_unclassified
OTU_4005	0	0	0	0	0	0	0	0	0	0	0	0	0	0	0	0	0	0	0	0	0	0	0	0	0	0	0	0	0	0.000539054	0	0	0	0	Eukaryota	Eukaryota_unclassified	Eukaryota_unclassified	Eukaryota_unclassified	Eukaryota_unclassified	Eukaryota_unclassified	Eukaryota_unclassified	Eukaryota_unclassified
OTU_5250	0	0	0	0	0	0	0	0	0	0	0	0	0	0	0	0	0	0	0	0	0	0	0	0	0	0	0	0	0	0.000404291	0	0	0	0	Eukaryota	Eukaryota_unclassified	Eukaryota_unclassified	Eukaryota_unclassified	Eukaryota_unclassified	Eukaryota_unclassified	Eukaryota_unclassified	Eukaryota_unclassified
OTU_3064	0	0	0	0	0	0	0	0	0	0	0	0	0	0	0	0	0	0	0	0	0	0	0	0	0	0	0	0	0	0	0	0.00333286	0	0	Eukaryota	Eukaryota_unclassified	Eukaryota_unclassified	Eukaryota_unclassified	Eukaryota_unclassified	Eukaryota_unclassified	Eukaryota_unclassified	Eukaryota_unclassified
OTU_1448	0	0	0	0	0	0	0	0	0	0	0	0	0	0	0	0	0	0	0	0	0	0	0	0	0	0	0	0	0	0	0.00413155	0	0	0	Eukaryota	Eukaryota_unclassified	Eukaryota_unclassified	Eukaryota_unclassified	Eukaryota_unclassified	Eukaryota_unclassified	Eukaryota_unclassified	Eukaryota_unclassified
OTU_2966	0	0	0	0	0	0	0	0	0	0	0	0	0	0	0	0	0	0	0	0	0	0	0	0	0	0	0	0	0	0	0.00998182	0	0	0	Eukaryota	Eukaryota_unclassified	Eukaryota_unclassified	Eukaryota_unclassified	Eukaryota_unclassified	Eukaryota_unclassified	Eukaryota_unclassified	Eukaryota_unclassified
OTU_2960	0	0	0	0	0	0	0	0	0	0	0	0	0	0	0	0	0	0	0	0	0	0	0	0	0	0	0	0	0	0	0.00152041	0	0	0	Eukaryota	Eukaryota_unclassified	Eukaryota_unclassified	Eukaryota_unclassified	Eukaryota_unclassified	Eukaryota_unclassified	Eukaryota_unclassified	Eukaryota_unclassified
OTU_1674	0	0	0	0	0	0	0	0	0	0	0	0	0	0	0	0	0	0	0	0	0	0	0	0	0	0	0	0	0	0	0.00267724	0	0	0	Eukaryota	Eukaryota_unclassified	Eukaryota_unclassified	Eukaryota_unclassified	Eukaryota_unclassified	Eukaryota_unclassified	Eukaryota_unclassified	Eukaryota_unclassified
OTU_3048	0	0	0	0	0	0	0	0	0	0	0	0	0	0	0	0	0	0	0	0	0	0	0	0	0	0	0	0	0	0	0.00152041	0	0	0	Eukaryota	Eukaryota_unclassified	Eukaryota_unclassified	Eukaryota_unclassified	Eukaryota_unclassified	Eukaryota_unclassified	Eukaryota_unclassified	Eukaryota_unclassified
OTU_4914	2.1e-05	0.000263616	8.42e-05	3.52e-05	0.000108657	0	0	0	0	0	0	0	0	0	0	0	0	0	0	0	0	0	0	0	0	0	0	0	0	0	0	0	0	0	Eukaryota	Eukaryota_unclassified	Eukaryota_unclassified	Eukaryota_unclassified	Eukaryota_unclassified	Eukaryota_unclassified	Eukaryota_unclassified	Eukaryota_unclassified
OTU_11789	0	0.000105446	0.00031565	5.28e-05	0.0003803	0	0	0	0	0	0	0	0	0	0	0	0	0	0	0	0	0	0	0	0	0	0	0	0	0	0	0	0	0	Eukaryota	Eukaryota_unclassified	Eukaryota_unclassified	Eukaryota_unclassified	Eukaryota_unclassified	Eukaryota_unclassified	Eukaryota_unclassified	Eukaryota_unclassified
OTU_6707	0	0.000210893	4.21e-05	0.000131989	2.72e-05	0	0	0	0	0	0	0	0	0	0	0	0	0	0	0	0	0	0	0	0	0	0	0	0	0	0	0	0	0	Eukaryota	Eukaryota_unclassified	Eukaryota_unclassified	Eukaryota_unclassified	Eukaryota_unclassified	Eukaryota_unclassified	Eukaryota_unclassified	Eukaryota_unclassified
OTU_8932	0	2.64e-05	0	3.52e-05	0.000353136	0	0	0	0	0	0	0	0	0	0	0	0	0	0	0	0	0	0	0	0	0	0	0	0	0	0	0	0	0	Eukaryota	Eukaryota_unclassified	Eukaryota_unclassified	Eukaryota_unclassified	Eukaryota_unclassified	Eukaryota_unclassified	Eukaryota_unclassified	Eukaryota_unclassified
OTU_4884	0	0.00113355	0.000336693	0.00011439	5.43e-05	0	0	0	0	0	0	0	0	0	0	0	0	0	0	0	0	0	0	0	0	0	0	0	0	0	0	0	0	0	Eukaryota	Eukaryota_unclassified	Eukaryota_unclassified	Eukaryota_unclassified	Eukaryota_unclassified	Eukaryota_unclassified	Eukaryota_unclassified	Eukaryota_unclassified
OTU_11823	0	5.27e-05	0	4.4e-05	0.000624779	0	0	0	0	0	0	0	0	0	0	0	0	0	0	0	0	0	0	0	0	0	0	0	0	0	0	0	0	0	Eukaryota	Eukaryota_unclassified	Eukaryota_unclassified	Eukaryota_unclassified	Eukaryota_unclassified	Eukaryota_unclassified	Eukaryota_unclassified	Eukaryota_unclassified
OTU_10691	0	0	0	0	0.0003803	0	0	0	0	0	0	0	0	0	0	0	0	0	0	0	0	0	0	0	0	0	0	0	0	0	0	0	0	0	Eukaryota	Eukaryota_unclassified	Eukaryota_unclassified	Eukaryota_unclassified	Eukaryota_unclassified	Eukaryota_unclassified	Eukaryota_unclassified	Eukaryota_unclassified
OTU_1804	0	0	2.1e-05	0.000431163	0	0	0	0	0	0	0	0	0	0	0	0	0	0	0	0	0	0	0	0	0	0	0	0	0	0	0	0	0	0	Eukaryota	Eukaryota_unclassified	Eukaryota_unclassified	Eukaryota_unclassified	Eukaryota_unclassified	Eukaryota_unclassified	Eukaryota_unclassified	Eukaryota_unclassified
OTU_1647	0.000168067	5.27e-05	0.000210433	0.000316773	0	0	0	0	0	0	0	0	0	0	0	0	0	0	0	0	0	0	0	0	0	0	0	0	0	0	0	0	0	0	Eukaryota	Eukaryota_unclassified	Eukaryota_unclassified	Eukaryota_unclassified	Eukaryota_unclassified	Eukaryota_unclassified	Eukaryota_unclassified	Eukaryota_unclassified
OTU_18616	0.000567227	0	0	0	0	0	0	0	0	0	0	0	0	0	0	0	0	0	0	0	0	0	0	0	0	0	0	0	0	0	0	0	0	0	Eukaryota	Eukaryota_unclassified	Eukaryota_unclassified	Eukaryota_unclassified	Eukaryota_unclassified	Eukaryota_unclassified	Eukaryota_unclassified	Eukaryota_unclassified
OTU_1546	0.00012605	0.000474508	0.000168347	0.000369569	0	0	0	0	0	0	0	0	0	0	0	0	0	0	0	0	0	0	0	0	0	0	0	0	0	0	0	0	0	0	Eukaryota	Eukaryota_unclassified	Eukaryota_unclassified	Eukaryota_unclassified	Eukaryota_unclassified	Eukaryota_unclassified	Eukaryota_unclassified	Eukaryota_unclassified
OTU_1693	0.00222689	0	0	0	0	0	0	0	0	0	0	0	0	0	0	0	0	0	0	0	0	0	0	0	0	0	0	0	0	0	0	0	0	0	Eukaryota	Eukaryota_unclassified	Eukaryota_unclassified	Eukaryota_unclassified	Eukaryota_unclassified	Eukaryota_unclassified	Eukaryota_unclassified	Eukaryota_unclassified
OTU_1874	0.00153361	0	0	0	0	0	0	0	0	0	0	0	0	0	0	0	0	0	0	0	0	0	0	0	0	0	0	0	0	0	0	0	0	0	Eukaryota	Eukaryota_unclassified	Eukaryota_unclassified	Eukaryota_unclassified	Eukaryota_unclassified	Eukaryota_unclassified	Eukaryota_unclassified	Eukaryota_unclassified
OTU_1207	6.3e-05	0	2.1e-05	8.8e-06	0.00019015	0.000143292	0	0	0	0	0	0	0	0	0	0	0	0	0	0	0	0	0	4.71e-05	0	0	6.11e-05	0	0	0	0	0	0.000861186	0	Eukaryota	Alveolata	Dinoflagellata	Dinophyceae	Dinophyceae_unclassified	Dinophyceae_unclassified	Dinophyceae_unclassified	Dinophyceae_unclassified
OTU_552	0.00273109	0.00519323	0.00864881	0.00654665	0.0294461	0.00866118	0	1.14e-05	0	0.00356519	0.00248453	0.00204563	0.00674722	0	0	0	0	0	1.97e-05	0	0	7.68e-05	0	0.00301247	6.14e-05	5.83e-05	0.00122105	0.0140886	0	0	0	0.00402134	0.0376843	0.00175464	Eukaryota	Alveolata	Dinoflagellata	Dinophyceae	Gymnodiniales	Gymnodiniaceae	Gyrodinium	Gyrodinium_fusiforme
OTU_5431	0	2.64e-05	0.000105217	8.8e-06	0.000217315	0.000891592	0	0	0.000272632	0.00623025	0.026942	0.00455932	0.00159251	0.00727706	0	0	1.53e-05	0	0	0	0	7.68e-05	5.46e-05	0	1.54e-05	2.92e-05	4.07e-05	0.00561051	3.51e-05	0	0	0.000422476	8.91e-05	1.47e-05	Eukaryota	Stramenopiles	Stramenopiles_X	MAST	MAST-7	MAST-7A	MAST-7A_X	MAST-7A_X_sp.
OTU_2568	0	0	0	0	0	0	0	0.000250358	0.0269224	0	0	0.0200922	0	0	0	0	0	0	0.000118427	0	4.36e-05	0	0	0	4.61e-05	0	0	0	0	0	0	0	0	0	Eukaryota	Alveolata	Ciliophora	Spirotrichea	Choreotrichida	Strobilidiidae_G	Strobilidiidae_G_X	Strobilidiidae_G_X_sp.
OTU_3008	2.1e-05	0.000975378	0.00044191	0.000747937	0.00279793	0.000907513	0	0	0	1.76e-05	1.44e-05	8.67e-05	9.78e-05	0	0	0	0	0	0	0	0	1.54e-05	0	2.35e-05	0	0.000102081	0	0.000374034	0	0	0	0.000109531	0.000697857	7.37e-05	Eukaryota	Alveolata	Dinoflagellata	Dinophyceae	Gymnodiniales	Gymnodiniaceae	Gymnodiniaceae_unclassified	Gymnodiniaceae_unclassified
OTU_1937	6.3e-05	0.00050087	0.000483997	0.000633546	0.00141254	0.000907513	0	0	0	0	0	0	0.00701264	0	0	0	0	0	0	0	0	1.54e-05	0	0.0018828	0	0	6.11e-05	0	0	0	0	0	0.000519681	0	Eukaryota	Alveolata	Dinoflagellata	Dinophyceae	Gymnodiniales	Gymnodiniaceae	Gyrodinium	Gyrodinium_dominans
OTU_2733	0.000441176	0.000448147	0.00145199	0.00220861	0.0042648	0.00154437	0	0	0	0	2.87e-05	0	0.00113152	0	0	0	0	0	1.97e-05	0	0	3.07e-05	1.36e-05	0	1.54e-05	5.83e-05	0.000162807	0.00353254	0	0	0	0.0014239	0.00360807	0.000324388	Eukaryota	Alveolata	Dinoflagellata	Dinophyceae	Gymnodiniales	Gymnodiniales_unclassified	Gymnodiniales_unclassified	Gymnodiniales_unclassified
OTU_652	0	0.000105446	0	3.52e-05	2.72e-05	6.37e-05	0	0	0	0	0	0	2.79e-05	9.44e-05	1.74e-05	0	0	0	0	1.76e-05	0	0.00010759	2.73e-05	0	0	0	4.07e-05	0	0.000175654	0	0	1.56e-05	2.97e-05	0	Eukaryota	Archaeplastida	Chlorophyta	Mamiellophyceae	Mamiellales	Mamiellaceae	Micromonas	Micromonas_unclassified
OTU_13712	0	5.27e-05	4.21e-05	4.4e-05	5.43e-05	1.59e-05	0	0	0	0.00144725	0.000531373	5.2e-05	0.00319899	0.000967129	0.00031318	0	0	1.78e-05	0	1.76e-05	2.9e-05	0.000184439	1.36e-05	0.00129442	1.54e-05	1.46e-05	0.000101754	0.00124678	7.03e-05	0.000539054	0.000892414	0.00148649	0.000237568	4.42e-05	Eukaryota	Archaeplastida	Chlorophyta	Mamiellophyceae	Mamiellales	Mamiellaceae	Micromonas	Micromonas_unclassified
OTU_4347	0	0.012469	0.00563961	0.00315893	0.00081493	0	0	0	0.00154037	0.000282391	0.00314515	0.00631024	0.000796256	0.00104969	0.0046629	0.000743897	0	1.78e-05	3.95e-05	0.00261133	0.000203264	0.0194276	0.0153537	0.0259355	0.0236084	0.00619777	0.00142456	0.00585986	0.00583172	5.39e-05	0.00115683	0.0068535	0.00460289	0.000914185	Eukaryota	Alveolata	Ciliophora	Spirotrichea	Strombidiida	Strombidiidae_R	Strombidium_R	Strombidium_R_unclassified
OTU_4269	0	0.000448147	0.000294607	0.000193584	8.15e-05	0	0	0	0	0	0	0	0	0	0	0	0	0	0	0	0	0	2.73e-05	9.41e-05	3.07e-05	1.46e-05	0	0	0	0	0	1.56e-05	0	0.000191684	Eukaryota	Alveolata	Dinoflagellata	Dinophyceae	Dinophyceae_unclassified	Dinophyceae_unclassified	Dinophyceae_unclassified	Dinophyceae_unclassified
OTU_873	0	0	0	0	0	0	0	0	0	0	0	0	0.0172522	0	0	0	0	0	0	0	0	0	0	0	0	0	2.04e-05	0	0	0	0	0	0.000489985	4.42e-05	Eukaryota	Stramenopiles	Stramenopiles_X	MAST	MAST-1	MAST-1A	MAST-1A_X	MAST-1A_X_sp.
OTU_1158	0	0	6.31e-05	0.000149587	0.000353136	0.00179911	0	0	0.00169032	0.00603611	0.00453821	0.00469801	0.00298945	0.0198969	0.00361897	0	0	0	0	0	0	0.000184439	9.55e-05	0.001012	0.000414721	0.00160413	0.0109691	0.0398969	3.51e-05	0	0.0205255	0.03167	0.00856731	0.0308316	Eukaryota	Opisthokonta	Choanoflagellida	Choanoflagellatea	Acanthoecida	Stephanoecidae_Group_D	Stephanoecidae_Group_D_X	Stephanoecidae_Group_D_X_sp.
OTU_745	0	0	0	0	0	1.59e-05	0	2.28e-05	0.0128546	0.0145078	0.013313	0.0243222	0.0694838	0.114334	0.0102305	0	0	0	0	0	0.000159707	0	1.36e-05	0	0	2.92e-05	0	0	0	0	0	0	0	0	Eukaryota	Stramenopiles	Stramenopiles_X	MOCH	MOCH-2	MOCH-2_X	MOCH-2_XX	MOCH-2_XX_sp.
OTU_464	0	0	0	0	0	1.59e-05	0	0.000489337	0.00357148	0.00194144	0	0	0	0	0	0	0	0	0	0	0	0	1.36e-05	0	1.54e-05	0.000131247	0.0024828	0	0	0	0	0	0.000118784	0.000442347	Eukaryota	Alveolata	Ciliophora	Ciliophora_unclassified	Ciliophora_unclassified	Ciliophora_unclassified	Ciliophora_unclassified	Ciliophora_unclassified
OTU_70	2.1e-05	0.000659039	0.00164138	0.00162786	0.0023633	0.00238819	0	0	0	0.00178259	0.00522756	0	0.000991828	0.000577919	0.00777729	0	0	1.78e-05	1.97e-05	0.000176442	0	0.000553318	0.00906213	0.00014121	0.000384001	0.0104852	0.00122105	0	0.000140523	0	0.00294166	0.0104211	0.000103936	0.00165143	Eukaryota	Alveolata	Ciliophora	CONTH_7	CONTH_7_X	CONTH_7_XX	CONTH_7_XXX	CONTH_7_XXX_sp.
OTU_6774	0	0.000711763	0.000273563	0.00011439	0.000162986	0.000191055	0	0	0.00175848	0.000935421	0.000172337	0.000381388	0	0	0.00132231	0	0	0	3.95e-05	0	0.000203264	0.000568688	4.09e-05	0.000823723	0.00010752	1.46e-05	0.00046807	0.00444685	0.000105393	0.00156326	0	0.00230015	0.000430593	0.000398113	Eukaryota	Hacrobia	Cryptophyta	Cryptophyceae	Cryptophyceae_X	Cryptomonadales	Teleaulax	Teleaulax_gracilis
OTU_5861	0	0	0	2.64e-05	0	0.000557245	0	0	0	0.0080658	0.000689348	0.00209764	0.000852134	0.00522486	0	0	0	0	0	0	0	3.07e-05	1.36e-05	0.00014121	1.54e-05	5.83e-05	0.000101754	0	3.51e-05	0	0	0.00125178	0	0	Eukaryota	Alveolata	Dinoflagellata	Syndiniales	Dino-Group-I	Dino-Group-I-Clade-1	Dino-Group-I-Clade-1_X	Dino-Group-I-Clade-1_X_sp.
OTU_86	0	7.91e-05	0.000168347	0.000140788	5.43e-05	0.00151252	0	0	0	0.00172965	0	0	0	0	0	0	0	0	0	0	0	0	0	0	0	0	0	0	0	0	0	0	0	0	Eukaryota	Alveolata	Dinoflagellata	Dinophyceae	Dinophyceae_unclassified	Dinophyceae_unclassified	Dinophyceae_unclassified	Dinophyceae_unclassified
OTU_761	0	0	0.00012626	0.000281576	5.43e-05	0	0.000243424	0.0549082	0.161671	0	0	0.0142847	0	0	0	0.00556795	0.00512475	1.78e-05	0.015889	0.00127038	0.0248708	3.07e-05	4.09e-05	0	0.000199681	0	2.04e-05	0	0	0	0	0	0	1.47e-05	Eukaryota	Alveolata	Ciliophora	CONThreeP	CONThreeP_X	Urotrichidae	Urotricha	Urotricha_sp.
OTU_779	0	0.0142616	0.0380463	0.102529	0.0524271	0.0306166	0.000279938	0.50544	0.402909	0.147373	0.0676997	0.0304244	0.0216805	0.00299574	0.122819	0.00608643	0	0.00533817	0.0600032	0.102283	0.134807	0.00797701	0.0653865	0.0233231	0.0875983	0.211074	0.114819	0.00752223	0.0510451	0.003423	0.0610808	0.0333286	0.0438759	0.0183427	Eukaryota	Alveolata	Ciliophora	Litostomatea	Haptoria_4	Didiniidae	Didiniidae_X	Didiniidae_X_sp.
OTU_699	0.000420168	0.000105446	0.000147303	7.92e-05	0.000217315	0.00378927	0	0	0	0	1.44e-05	0	0.00775302	0	0.00179208	0	0	0	0	0	0	0.000368879	0	9.41e-05	0	2.92e-05	4.07e-05	0.0101405	0	0	0	0.00905976	0.00170752	0.00258036	Eukaryota	Alveolata	Dinoflagellata	Dinophyceae	Peridiniales	Thoracosphaeraceae	Thoracosphaeraceae_unclassified	Thoracosphaeraceae_unclassified
OTU_2391	0	0	0	0	0	0	0	0.000284498	0.0251503	0	0	0.0176132	0	0	0	0	0	0	9.87e-05	1.76e-05	8.71e-05	0	0	0	0	0	0	0	0	0	0	0	0	0	Eukaryota	Alveolata	Ciliophora	Spirotrichea	Choreotrichida	Strobilidiidae_G	Strobilidiidae_G_X	Strobilidiidae_G_X_sp.
OTU_4448	0	0.000289977	0.000147303	7.92e-05	0	0.000143292	0	0	0.000899685	0.000441236	0.000143614	0.000156022	0	0	0.00123532	0	0	0	0	1.76e-05	5.81e-05	0.000230549	1.36e-05	0.000470699	3.07e-05	0	0.000264561	0.00128834	3.51e-05	0.000808582	0	0.00090754	0.000296961	0.000221174	Eukaryota	Hacrobia	Cryptophyta	Cryptophyceae	Cryptophyceae_X	Cryptomonadales	Teleaulax	Teleaulax_gracilis
OTU_2481	0	0	2.1e-05	0	0	0.000175134	0	3.41e-05	0.00433485	0	0	0.0097254	0.00113152	0	0.00060896	0	0	0	0	3.53e-05	0	1.54e-05	0.000627798	0	1.54e-05	0.000699984	6.11e-05	0	0	0	0	0	0.000163328	0.00153347	Eukaryota	Alveolata	Ciliophora	CONThreeP	CONThreeP_X	Urotrichidae	Urotricha	Urotricha_sp.
OTU_3065	0.000441176	0.00200348	0.00397719	0.00374848	0.00290658	0.00804025	0	0	0	0.000864823	0.000818601	0	0.00283579	9.44e-05	0	2.25e-05	0	0.000106763	0	0	0.000101632	0	0	0.00136503	1.54e-05	4.37e-05	2.04e-05	0.00103898	0	0	0	0.00147084	0.000920578	0.00145975	Eukaryota	Alveolata	Dinoflagellata	Dinophyceae	Dinophyceae_unclassified	Dinophyceae_unclassified	Dinophyceae_unclassified	Dinophyceae_unclassified
OTU_22848	0	5.27e-05	2.1e-05	0.000219981	8.15e-05	0.00103488	0	5.69e-05	0.00219469	0.00412997	0.00416481	0.0119617	0.010044	0.0284124	0.0154676	0	0	0	0	0	0.000174226	6.15e-05	0.000232012	0.000329489	0.0001536	0.00271244	0.00126175	0.00403125	3.51e-05	0	0.000462733	0.00408393	0.000712705	0.00224123	Eukaryota	Opisthokonta	Choanoflagellida	Choanoflagellatea	Acanthoecida	Stephanoecidae_Group_H	Stephanoecidae_Group_H_X	Stephanoecidae_Group_H_X_sp.
OTU_5439	0.000315126	0.000289977	0.00143095	0.00143428	0.00309673	0.00108265	0	0	0	0	0	0	0.00108961	0	0	2.25e-05	0	0	5.92e-05	0	0	1.54e-05	0	0	0	2.92e-05	0.000101754	0.00278447	0	0	0	0.000938835	0.00308839	0.000176939	Eukaryota	Alveolata	Dinoflagellata	Dinophyceae	Dinophyceae_unclassified	Dinophyceae_unclassified	Dinophyceae_unclassified	Dinophyceae_unclassified
OTU_684	0.000777311	0.000949017	0.00145199	0.00139028	0.00448211	0.0017195	0	1.14e-05	0	0.00063538	0.000560095	0.000190694	0.00142488	0	0	0	0	0	0	0	0	1.54e-05	0	0.00014121	0	0	0.000122105	0.00274291	0	0	3.31e-05	0.000641537	0.00626587	0.000398113	Eukaryota	Alveolata	Dinoflagellata	Dinophyceae	Gymnodiniales	Gymnodiniaceae	Gymnodiniaceae_unclassified	Gymnodiniaceae_unclassified
OTU_11356	0	0	0	0	0	0	0	6.83e-05	0.00618874	0	0	0.00433396	0	0	0	0	0	0	3.95e-05	3.53e-05	0	0	0	0	0	0	0	0	0	0	0	0	0	0	Eukaryota	Alveolata	Ciliophora	Spirotrichea	Choreotrichida	Strobilidiidae_G	Strobilidiidae_G_X	Strobilidiidae_G_X_sp.
OTU_22517	0	2.64e-05	8.42e-05	6.16e-05	0.000271643	9.55e-05	0	0	0	0	0	0	0	0	0	0	0	0	0	0	0	0	0	0	0	0	2.04e-05	4.16e-05	0	0	0	1.56e-05	5.94e-05	0	Eukaryota	Alveolata	Dinoflagellata	Dinophyceae	Dinophyceae_unclassified	Dinophyceae_unclassified	Dinophyceae_unclassified	Dinophyceae_unclassified
OTU_4633	0.000378151	2.64e-05	2.1e-05	2.64e-05	2.72e-05	3.18e-05	0	0	0	0	0	0	0	0	0	0	0	0	0	0	0	0	0	0.00014121	0	0	0.000407017	0.000124678	0	0	0	0	0.00139572	0	Eukaryota	Alveolata	Dinoflagellata	Dinophyceae	Dinophyceae_unclassified	Dinophyceae_unclassified	Dinophyceae_unclassified	Dinophyceae_unclassified
OTU_250	0.000819328	0.000210893	0.000526083	0.000404766	0	0	0.000121712	0.0064638	0	0	0	0	0	0	0	0.00200627	0.00165216	0.000160145	0.000118427	1.76e-05	0	1.54e-05	0	0	0	0	0	0	0	0	0	0	0	0	Eukaryota	Stramenopiles	Ochrophyta	Chrysophyceae	Chrysophyceae_X	Chrysophyceae_Clade-E	Chrysophyceae_Clade-E_X	Chrysophyceae_Clade-E_X_sp.
OTU_256	0	0	0	8.8e-06	0	0	0	0	0	0	0	0	0	0	0	0.000428304	0	0	0	0	0	0	0	0	0	0	0	0	0	0	0	0	2.97e-05	0	Eukaryota	Hacrobia	Telonemia	Telonemia_X	Telonemia_XX	Telonemia-Group-1	Telonemia-Group-1_unclassified	Telonemia-Group-1_unclassified
OTU_215	0	0	2.1e-05	8.8e-06	0.000162986	0.00132147	0	0	0.00193569	0.00391818	0.0060318	0	0.000642593	0	0.012214	0.000879151	0	0	0.000355282	0.0151563	0.00367327	0.00707018	0.019994	0.00564839	0.00534529	0.0114185	0.0145509	0.00943396	0.0167926	0	0	0.00544524	0.0120121	0.00890593	Eukaryota	Alveolata	Ciliophora	Spirotrichea	Strombidiida_B	Strombidiida_B_X	Strombidiida_B_XX	Strombidiida_B_XX_sp.
OTU_6369	0.000546218	0	0	3.52e-05	0	0.000557245	0	0.00135421	0	0	0	0	0	0	0	0	0	0	0	0	0.00013067	0	0	0	0	0	0.000508771	0	0	0	0.000594943	9.39e-05	0.00463258	0	Eukaryota	Alveolata	Dinoflagellata	Dinophyceae	Gymnodiniales	Gymnodiniaceae	Gyrodinium	Gyrodinium_unclassified
OTU_325	0	0.000237254	0.000462953	0.000211182	0.000733437	0.00533363	0	1.14e-05	0	0	5.74e-05	0	0.0169449	0	0.00375816	0	0	0	0	0	0	0.000768498	0	0	1.54e-05	4.37e-05	8.14e-05	0.0260577	0	0	0	0.0204666	0.00334081	0.00611914	Eukaryota	Alveolata	Dinoflagellata	Dinophyceae	Dinophyceae_unclassified	Dinophyceae_unclassified	Dinophyceae_unclassified	Dinophyceae_unclassified
OTU_12966	0	0.000237254	0.000147303	6.16e-05	0	4.78e-05	0	0	0.000736106	0.000352989	8.62e-05	5.2e-05	0	0	0.000643758	0	0	0	0	1.76e-05	0.000159707	0.000292029	2.73e-05	0.000517769	0.00013824	0	0.000223859	0.00141302	0	0.000619913	0	0.000860599	0.00014848	0.000206429	Eukaryota	Hacrobia	Cryptophyta	Cryptophyceae	Cryptophyceae_X	Cryptomonadales	Teleaulax	Teleaulax_gracilis
OTU_4609	0	0	0	0	0.000271643	0	0	0	0	0	1.44e-05	1.73e-05	0	3.54e-05	3.48e-05	0	0	0	0	0	0	0	0	0	4.61e-05	0	0	0	0	0	0	0	0	0	Eukaryota	Stramenopiles	Ochrophyta	Bacillariophyta	Bacillariophyta_X	Polar-centric-Mediophyceae	Chaetoceros	Chaetoceros_peruvianus
OTU_6524	0	0	0	0	0	0	0	0.000125179	0.0205292	0	0	0.0145101	0	0	0	0	0	0	0.000138165	1.76e-05	2.9e-05	1.54e-05	0	0	4.61e-05	0	0	0	0	0	0	0	0	0	Eukaryota	Alveolata	Ciliophora	Spirotrichea	Choreotrichida	Strobilidiidae_G	Strobilidiidae_G_X	Strobilidiidae_G_X_sp.
OTU_1890	0	0.000606316	0.000904863	0.000994316	0.00255345	0.00584311	0	3.41e-05	0.0059979	0.00637145	0.0222028	0.0201616	0.011888	0.0358781	0.00285342	0.000743897	0	0	0	0	0	4.61e-05	2.73e-05	0.00018828	0	0.000160413	0.00101754	0.0035741	3.51e-05	0	0	0.00433429	0.000267265	0.00486582	Eukaryota	Opisthokonta	Choanoflagellida	Choanoflagellatea	Acanthoecida	Stephanoecidae_Group_D	Stephanoecidae_Group_D_X	Stephanoecidae_Group_D_X_sp.
OTU_407	4.2e-05	0	4.21e-05	8.8e-06	0	0	0	2.28e-05	0	0	0	0	0	0	0	0	0	0.000533817	0.000355282	0	0	0	0	0	0	0	0	0	0	0	0	0	0	0	Eukaryota	Rhizaria	Cercozoa	Filosa-Imbricatea	Filosa-Imbricatea_X	Novel-clade-2	Novel-clade-2_X	Novel-clade-2_X_sp.
OTU_22266	0	7.91e-05	4.21e-05	5.28e-05	0.000244479	0.000573166	0	0	0	1.76e-05	2.87e-05	0	0.000223511	0	0	0	0	0	0	0	0	0	0	4.71e-05	0	0	0	4.16e-05	0	0	0	1.56e-05	5.94e-05	8.85e-05	Eukaryota	Alveolata	Dinoflagellata	Dinophyceae	Dinophyceae_unclassified	Dinophyceae_unclassified	Dinophyceae_unclassified	Dinophyceae_unclassified
OTU_1421	0.000252101	0	2.1e-05	3.52e-05	0	0	0	0.000534857	0.000640685	0	0	0	0	0	0	0.00238949	0.00189692	0.00316732	0.000138165	5.29e-05	0.000101632	0	0	0	0	0	0	0	0	0	0	0	0	0	Eukaryota	Rhizaria	Cercozoa	Novel-clade-10-12	Novel-clade-10	Novel-clade-10_X	Novel-clade-10_XX	Novel-clade-10_XX_sp.
OTU_30	0	0.000131808	0.00018939	0.00011439	0.000217315	0.000811986	0	0	0	0.00100602	7.18e-05	0	0	0.00107328	0	0	0	0	0	0	0	0	0	4.71e-05	0	0	0	0	0	0	0	0.00328592	0.00132147	0	Eukaryota	Hacrobia	Haptophyta	Prymnesiophyceae	Prymnesiales	Chrysochromulinaceae	Chrysochromulina	Chrysochromulina_sp.
OTU_165	0	7.91e-05	0.000147303	7.92e-05	0.000325972	0.000923435	0.00583002	0	0	0.00497714	0.00202496	0	0.000894042	7.08e-05	0	0	0	0	0	0	0	0	0	0	0	0	0	8.31e-05	0	0	3.31e-05	0	0.000178176	0	Eukaryota	Alveolata	Dinoflagellata	Dinophyceae	Dinophyceae_unclassified	Dinophyceae_unclassified	Dinophyceae_unclassified	Dinophyceae_unclassified
OTU_5354	0	0	0	0	0	1.59e-05	0	0	0.000136316	0	0	0	0	0.00080201	0.00111353	6.76e-05	0	0	7.9e-05	0	0	1.54e-05	0	0	0	8.75e-05	0	0	0	0	0	0	7.42e-05	0.000221174	Eukaryota	Rhizaria	Cercozoa	Filosa-Thecofilosea	Ventricleftida	CCW10-lineage	CCW10-lineage_X	CCW10-lineage_X_sp.
OTU_5409	0	0.000949017	0.000231477	0.000219981	0.000108657	0.000206977	1.22e-05	0	0.00209926	0.000917771	0.000157976	0.000329381	0	0	0.00214006	0	0	0	0	8.82e-05	0.000145188	0.000829978	5.46e-05	0.00120028	0.000276481	0	0.000386666	0.00353254	7.03e-05	0.00164412	0	0.00192461	0.000549377	0.000663521	Eukaryota	Hacrobia	Cryptophyta	Cryptophyceae	Cryptophyceae_X	Cryptomonadales	Teleaulax	Teleaulax_gracilis
OTU_2808	0.000168067	2.64e-05	6.31e-05	0.000219981	0	0	0.000133883	1.14e-05	0.000368053	0	0	0	0	0	0	0.000112712	0.000596613	7.12e-05	1.97e-05	1.76e-05	0	6.15e-05	2.73e-05	0	0	0	0	0	0	0	0	0	0	0	Eukaryota	Stramenopiles	Ochrophyta	Chrysophyceae	Chrysophyceae_X	Chrysophyceae_Clade-E	Chrysosaccus	Chrysosaccus_sp.
OTU_4583	0.000210084	0	0	8.8e-06	0	0	1.22e-05	0.000853495	0.00145858	0	0	0	0	0	0	0.0222493	0.0158944	0.0181142	0.00988868	0.000264662	8.71e-05	0.00010759	4.09e-05	0	1.54e-05	0	0	0	0	0	0	0	0	0	Eukaryota	Hacrobia	Cryptophyta	Cryptophyceae	Cryptophyceae_X	Basal_Cryptophyceae-1	Basal_Cryptophyceae-1_X	Basal_Cryptophyceae-1_X_sp.
OTU_1377	8.4e-05	0	0	8.8e-06	2.72e-05	0.000334347	0	0.00143387	0	0	0	0	1.4e-05	0	0	0	0	0	0	0	0	0	0	0	0	0	0.000407017	0	0	0	3.31e-05	0	0.00372686	0	Eukaryota	Alveolata	Dinoflagellata	Dinophyceae	Dinophyceae_unclassified	Dinophyceae_unclassified	Dinophyceae_unclassified	Dinophyceae_unclassified
OTU_22762	0.000168067	0	0.000105217	0.000105591	0.000244479	0.000636851	0	0	0	0	0	0	0	0	0	0	0	0	0	0	0	3.07e-05	0	0.000164745	0	0	0.00172982	0.0011221	0	0	0.000495786	0	0.00850792	0	Eukaryota	Alveolata	Dinoflagellata	Dinophyceae	Dinophyceae_unclassified	Dinophyceae_unclassified	Dinophyceae_unclassified	Dinophyceae_unclassified
OTU_6596	0	0.0305794	0.0174449	0.0106911	0.00282509	0	0	0	0.0055208	0.00142961	0.00894716	0.0156196	0.0015087	0.00235885	0.0124054	0.00198372	0	0	9.87e-05	0.0121568	0.00062431	0.058621	0.0582351	0.0784185	0.0714703	0.0244849	0.00327649	0.0202394	0.0227648	8.09e-05	0.00304082	0.0185107	0.0142096	0.00381893	Eukaryota	Alveolata	Ciliophora	Spirotrichea	Strombidiida	Strombidiidae_R	Strombidium_R	Strombidium_R_unclassified
OTU_1894	0	0	0	0	0	0.000175134	0	0	0	0	0	0.00156022	0	0	0	0	0	0	0	0	0	7.68e-05	5.46e-05	0	0	2.92e-05	0	0	7.03e-05	0	0	0	0	0	Eukaryota	Hacrobia	Haptophyta	Prymnesiophyceae	Prymnesiophyceae_unclassified	Prymnesiophyceae_unclassified	Prymnesiophyceae_unclassified	Prymnesiophyceae_unclassified
OTU_815	0.0257773	0.000527232	0.00075756	0.00100311	0.00171135	0.0036619	0	0	0	0	0	0	0.00069847	0	0	0	0	0	0	0	0.000203264	7.68e-05	0	0.000470699	0	0	0.00250315	0.000540271	0	0	0.00363576	0.000187767	0.0199854	4.42e-05	Eukaryota	Alveolata	Dinoflagellata	Dinophyceae	Gymnodiniales	Gymnodiniaceae	Gyrodinium	Gyrodinium_unclassified
OTU_3830	0	0.00213529	0.00412449	0.00440843	0.00268927	1.59e-05	0	0	0.000395316	0.00278861	0.012437	0	0.00353426	0	0.00135711	0	0	0	0	3.53e-05	0	4.61e-05	0.000764276	0	0.000322561	0.000247911	0.00170947	0	0.00175654	0	0	0	0.00157389	4.42e-05	Eukaryota	Alveolata	Ciliophora	Spirotrichea	Strombidiida_G	Strombidiida_G_X	Strombidiida_G_XX	Strombidiida_G_XX_sp.
OTU_11005	0	0.000184531	8.42e-05	1.76e-05	0	0	0	0	0.000218105	0.000388288	8.62e-05	0	0	0	0	0.000112712	0	0	0	0.000317595	4.36e-05	0.00207494	0.0015149	0.000447164	0.0001536	0.00230411	4.07e-05	0.00340786	0.000245916	0	0	0.00090754	0.000193024	0.000324388	Eukaryota	Alveolata	Ciliophora	Spirotrichea	Strombidiida	Strombidiidae_R	Strombidiidae_R_X	Strombidiidae_R_X_sp.
OTU_392	0	0.00311067	0.00216746	0.00219101	0	9.55e-05	0	0	0	0.0318043	0.0158837	0.0538451	0	0.00891646	0	0	0	0	0	5.29e-05	0	0.000245919	0.000641446	0.00270652	0.000522241	0.000116664	0.000630876	0	0.00105393	0	0	0.000485065	2.97e-05	1.47e-05	Eukaryota	Rhizaria	Cercozoa	Filosa-Thecofilosea	Cryomonadida	Cryothecomonas-lineage	Cryothecomonas	Cryothecomonas_aestivalis
OTU_1205	0	5.27e-05	4.21e-05	0	2.72e-05	0.00012737	0	0	0	0.00227678	0.000718071	0.00083212	0.00121534	0.00154505	0	0	0	0	0	0	0	0	0	0	0	0	0	0	0	0	0	0	0	0	Eukaryota	Stramenopiles	Ochrophyta	Bolidophyceae	Parmales	Triparmaceae	Triparma	Triparma_laevis_clade
OTU_2135	0	0	0	1.76e-05	0	0	0	0	0	0	0	0	0	0	0.00107873	0	0	0	0	0	0	0	0	0	0	0	0	0	0	0	0	0	0	0	Eukaryota	Stramenopiles	Stramenopiles_X	MAST	MAST-12	MAST-12A	MAST-12A_X	MAST-12A_X_sp.
OTU_126	0	0	0	0	0	0	0	0.000102419	0	0	0	0	0	0	0	0	0	1.78e-05	0.00027633	3.53e-05	0	3.07e-05	0	0	0	0	0	0	0	0	0	0	0	0	Eukaryota	Archaeplastida	Chlorophyta	Chlorophyceae	Chlorophyceae_unclassified	Chlorophyceae_unclassified	Chlorophyceae_unclassified	Chlorophyceae_unclassified
OTU_593	0.00140756	0	0	8.8e-06	2.72e-05	0.00186279	0	0	0	0	0	0.000450732	0.0115946	0.000141531	0.00760331	0	0	0	0	0	0	0.000199809	9.55e-05	0	6.14e-05	0.000364575	0	0	0.000105393	0	0	0.00117354	4.45e-05	0.0016072	Eukaryota	Stramenopiles	Ochrophyta	Bacillariophyta	Bacillariophyta_X	Polar-centric-Mediophyceae	Chaetoceros	Chaetoceros_socialis
OTU_453	0	0.0579164	0.0244103	0.0148091	0.00320539	0	2.43e-05	1.14e-05	0.00682943	0.00144725	0.0113024	0.0218258	0.00303136	0.00347931	0.0170335	0.00247966	0	1.78e-05	5.92e-05	0.00924554	0.00101632	0.0728382	0.0600502	0.101365	0.0955702	0.0265119	0.00451789	0.0212784	0.0270508	0.00029648	0.00545364	0.025771	0.0187531	0.00303745	Eukaryota	Alveolata	Ciliophora	Spirotrichea	Strombidiida	Strombidiidae_R	Strombidiidae_R_unclassified	Strombidiidae_R_unclassified
OTU_455	0	0.0110719	0.00361945	0.002411	0.000651944	0	0	0	0.000954211	0.000105897	0.00140742	0.00254837	0.000419082	0.000566125	0.00259243	0.000383219	3.06e-05	0	0	0.00245254	8.71e-05	0.0130184	0.00970357	0.0136738	0.013778	0.0044624	0.000590175	0.00253512	0.00516424	2.7e-05	0.000429681	0.00402134	0.00274689	0.000560307	Eukaryota	Alveolata	Ciliophora	Spirotrichea	Strombidiida	Strombidiidae_R	Strombidium_R	Strombidium_R_unclassified
OTU_225	0.000336134	0.00144989	0.00231477	0.00247259	0.00657376	0.00237227	0	0	0	1.76e-05	0	0	0.0010058	0	0	0.000270508	0	0	5.92e-05	0	0	4.61e-05	1.36e-05	0	0	5.83e-05	0.00024421	0.00187017	0	0	0.000528838	0.00079801	0.0041723	0.000250664	Eukaryota	Alveolata	Dinoflagellata	Dinophyceae	Gymnodiniales	Gymnodiniales_unclassified	Gymnodiniales_unclassified	Gymnodiniales_unclassified
OTU_912	2.1e-05	5.27e-05	6.31e-05	2.64e-05	0.000298807	6.37e-05	0	0	0	0	0	3.47e-05	0	0.000247679	0	0	0	0.00081852	0	0	0	0	0	0	0	0	0	0	0	0	6.61e-05	0	2.97e-05	0	Eukaryota	Hacrobia	Haptophyta	Prymnesiophyceae	Prymnesiales	Chrysochromulinaceae	Chrysochromulina	Chrysochromulina_sp.
OTU_222	0	0.00313703	0.00284085	0.00381888	0.000271643	0	1.22e-05	0.000113799	0.00654316	0.040982	0.0253479	0.157045	0	0.0503733	0.0472901	0	0	0	1.97e-05	3.53e-05	0	0.000230549	0.00238836	0.0043069	0.000936962	0.00402491	0.00575929	0.0411437	0.00080801	0.000215622	0	0.0356601	0.00424654	0.0141994	Eukaryota	Hacrobia	Telonemia	Telonemia_X	Telonemia_XX	Telonemia-Group-2	Telonemia-Group-2_X	Telonemia-Group-2_X_sp.
OTU_22457	0.0069958	2.64e-05	0.000147303	0.000211182	0.000353136	0.000668694	0	0	0	0	0	0	0.00046099	0	0	9.02e-05	0	0.000124557	0	0	0.000145188	3.07e-05	0	7.06e-05	0	0	0.000183158	0	0	0	0.00082631	7.82e-05	0.00100967	0	Eukaryota	Alveolata	Dinoflagellata	Dinophyceae	Gymnodiniales	Gymnodiniaceae	Gyrodinium	Gyrodinium_helveticum
OTU_193	0	0	0	0	0	0	0	0.000147939	0	0	0	0	0	0	0	0	0.000107084	0.0038079	0.000493447	0.000229374	0	3.07e-05	0	0	0	0	0	0	0	0	0	0	0	0	Eukaryota	Stramenopiles	Ochrophyta	Synurophyceae	Synurales	Synurales_X	Synurales_XX	Synurales_XX_sp.
OTU_22281	0.000231092	0.00158169	0.00180973	0.000818331	0.00361285	0.000780143	0	0	0	0.000441236	0.000804239	3.47e-05	0.000111755	0	0	0	0	0	0	0	0	0	0	0	0	0	4.07e-05	4.16e-05	0	0	0.00161957	9.39e-05	0.00170752	8.85e-05	Eukaryota	Alveolata	Dinoflagellata	Dinophyceae	Gymnodiniales	Gymnodiniaceae	Gymnodiniaceae_unclassified	Gymnodiniaceae_unclassified
OTU_23134	0.000483193	0.000975378	0.000778603	0.000492758	0.00138538	0.000238819	0	0	0	0.000758926	0.00117764	1.73e-05	0.000195572	0	6.96e-05	0	0	0	1.97e-05	0	0	0	0	0	0	0	0	0.000457152	0	0	0	0.000125178	0.00118784	0.000176939	Eukaryota	Alveolata	Dinoflagellata	Dinophyceae	Dinophyceae_unclassified	Dinophyceae_unclassified	Dinophyceae_unclassified	Dinophyceae_unclassified
OTU_5179	0	0	0	0	0	0	0	3.41e-05	0.000545264	0	0	0	0	0	0	0	1.53e-05	0	0.000118427	0	0	1.54e-05	0	0	0	0	0	0	0	0	0	0	0	0	Eukaryota	Alveolata	Ciliophora	CONThreeP	CONThreeP_X	Urotrichidae	Urotricha	Urotricha_sp.
OTU_202	0.00428571	0.00110719	0.000862776	0.00138148	0	0	0.00542837	0.00125179	0	0	0	0	0	0	0	0.00067627	0.00113203	0	0.000118427	0	0	0	0	0	0	0	0	0	0	0	0	0	0	0	Eukaryota	Stramenopiles	Ochrophyta	Chrysophyceae	Chrysophyceae_X	Chrysophyceae_Clade-C	Chrysophyceae_Clade-C_unclassified	Chrysophyceae_Clade-C_unclassified
OTU_2099	0.0230042	0.000105446	0.000231477	0.00035197	0.000570451	0.00144884	0	0	0	0	0	0	0.000684501	0	0	0	0	0	0	0	0.000188745	4.61e-05	0	2.35e-05	0	0	0.000162807	0	0	0	0.00115683	4.69e-05	0.00160359	0	Eukaryota	Alveolata	Dinoflagellata	Dinophyceae	Dinophyceae_unclassified	Dinophyceae_unclassified	Dinophyceae_unclassified	Dinophyceae_unclassified
OTU_13419	0	0.00113355	0.000673387	0.000378368	0.000325972	0.000573166	0	0	0.00254911	0.00102367	0.000157976	0.000554747	0.00646783	0	0.00274902	0.000135254	0	0	3.95e-05	0.000229374	0.000203264	0.00124497	0.000136478	0.00131796	0.000276481	0	0.000569824	0.00411437	3.51e-05	0.00161716	0	0.00239403	0.000534529	0.00078148	Eukaryota	Hacrobia	Cryptophyta	Cryptophyceae	Cryptophyceae_X	Cryptomonadales	Teleaulax	Teleaulax_gracilis
OTU_1505	0	0.000131808	0.00018939	6.16e-05	5.43e-05	9.55e-05	0	0	0.000872422	0.000741277	0.000143614	0.000294709	0	0	0.000852545	0	0	0	0	3.53e-05	0.00013067	0.000199809	2.73e-05	0.000541304	7.68e-05	1.46e-05	0.000366315	0.00207797	0	0.0010242	0	0.00145519	0.000386049	0.000398113	Eukaryota	Hacrobia	Cryptophyta	Cryptophyceae	Cryptophyceae_X	Cryptomonadales	Teleaulax	Teleaulax_gracilis
OTU_22152	0.00039916	0.000896294	0.000862776	0.000554353	0.00244479	0.00116225	0	0	0	0.000194144	5.74e-05	0.00020803	0.000628623	0	0	0	0	0	0	0	0	0	0	0	0	0	0.000122105	0.00058183	0	0	0	0.000344239	0.00334081	0.000206429	Eukaryota	Alveolata	Dinoflagellata	Dinophyceae	Dinophyceae_unclassified	Dinophyceae_unclassified	Dinophyceae_unclassified	Dinophyceae_unclassified
OTU_11513	0	0.000105446	0.000105217	8.8e-06	0	0	0	0	0	0	0	0	0	0	3.48e-05	0	0	0	0	0	0	0	0	2.35e-05	1.54e-05	0.000116664	0	0	0	0	0	0	0	0	Eukaryota	Alveolata	Ciliophora	Spirotrichea	Strombidiida	Strombidiidae_R	Strombidium_R	Strombidium_R_unclassified
OTU_1545	0	2.64e-05	0	0.000272777	0.000325972	0.000175134	0	0	6.82e-05	0.00291216	0	0.00105749	0.00170427	0.000955335	0	0	0	0	0	0	0	0	6.82e-05	0	4.61e-05	0.000408324	0.000101754	0	0.000140523	0	0.00082631	0.0028165	0.000386049	7.37e-05	Eukaryota	Stramenopiles	Stramenopiles_X	Stramenopiles_X-Group-7	Stramenopiles_X-Group-7_X	Stramenopiles_X-Group-7_XX	Stramenopiles_X-Group-7_XXX	Stramenopiles_X-Group-7_XXX_sp.
OTU_11158	0	0.00276796	0.00538709	0.00462841	0.00157553	0	0	0	0.00152674	0.00986604	0.0219012	0.00130019	0.00131312	0.000106148	0.000347977	0	0	0	0	5.29e-05	0	0	0.000545911	2.35e-05	3.07e-05	0.000116664	0.00207579	0	0.000351309	0	0	0	0.000623617	0	Eukaryota	Alveolata	Ciliophora	Spirotrichea	Strombidiida	Tontoniidae_A	Laboea	Laboea_strobila
OTU_2819	0	0.0010281	0.000589213	0.000395966	0.000271643	0.000382111	6.09e-05	0	0.00391227	0.00247092	0.000330313	0.000814784	0	0	0.00424532	0	0	0	5.92e-05	0.000105865	0.000406528	0.00112201	4.09e-05	0.00200047	0.000368641	1.46e-05	0.0012007	0.00785471	0.000140523	0.00336909	0	0.00433429	0.00112845	0.00117959	Eukaryota	Hacrobia	Cryptophyta	Cryptophyceae	Cryptophyceae_X	Cryptomonadales	Cryptomonadales_unclassified	Cryptomonadales_unclassified
OTU_69	0	0.0264934	0.0147093	0.00850888	0.00209165	1.59e-05	0	0	0.00430758	0.000794225	0.00630466	0.0127765	0.00173221	0.0018399	0.0116398	0.00184847	0	0	3.95e-05	0.00793987	0.000435565	0.0480004	0.0452833	0.0702048	0.0639899	0.0190016	0.00337824	0.0145042	0.0191463	0.000134764	0.00280945	0.0170868	0.0127248	0.00235919	Eukaryota	Alveolata	Ciliophora	Spirotrichea	Strombidiida	Strombidiidae_R	Strombidium_R	Strombidium_R_unclassified
OTU_23283	0.0153151	0.000237254	0.000420867	0.000307974	0.000570451	0.00140107	0	0	0	0	0	1.73e-05	0.00181602	3.54e-05	1.74e-05	0	0	1.78e-05	0	0	7.26e-05	4.61e-05	0	9.41e-05	0	0	0.000325614	0.000124678	0	0	0.0013882	7.82e-05	0.00261325	1.47e-05	Eukaryota	Alveolata	Dinoflagellata	Dinophyceae	Dinophyceae_unclassified	Dinophyceae_unclassified	Dinophyceae_unclassified	Dinophyceae_unclassified
OTU_1242	0.000567227	0.00216165	0.00246207	0.00242859	0.00119523	0.00437835	0	1.14e-05	0	1.76e-05	0.000129253	0	8.38e-05	0.000141531	1.74e-05	0	0	0.000266909	0	0	1.45e-05	6.15e-05	0	0.00014121	0	0	0	4.16e-05	0	0	0	0.000344239	0.000207872	0.000501327	Eukaryota	Alveolata	Dinoflagellata	Dinophyceae	Dinophyceae_unclassified	Dinophyceae_unclassified	Dinophyceae_unclassified	Dinophyceae_unclassified
OTU_9184	0	0.000474508	0.000147303	4.4e-05	8.15e-05	9.55e-05	0	0	0.000736106	0.000388288	4.31e-05	0.000121351	0	0	0.00060896	0	0	0	0	0	0.000101632	0.00013833	0	0.000470699	9.22e-05	0	0.000142456	0.00162081	0	0.000700771	0	0.000719773	0.000296961	0.000206429	Eukaryota	Hacrobia	Cryptophyta	Cryptophyceae	Cryptophyceae_X	Cryptomonadales	Teleaulax	Teleaulax_gracilis
OTU_568	0	0.012179	0.00357737	0.00183904	0.000869258	0	0	0	0.000136316	3.53e-05	0.000244144	0.000312045	1.4e-05	0.000153325	0.000365376	0.000157796	0	0	0	0.000546969	1.45e-05	0.00370416	0.00227918	0.00284773	0.00523777	0.00123956	0.000183158	0.000540271	0.00242403	0	0	0.000688479	0.000742402	0.000280153	Eukaryota	Alveolata	Ciliophora	Spirotrichea	Strombidiida	Strombidiidae_R	Strombidium_R	Strombidium_R_unclassified
OTU_3847	2.1e-05	0.000790847	0.000420867	0.00035197	0.00241762	0.000206977	0	0	0	0	0	0	1.4e-05	0	0	0	0	0	0	0	0	0	0	0	0	0	0	0	0	0	0	1.56e-05	0.000296961	0	Eukaryota	Alveolata	Dinoflagellata	Dinophyceae	Dinophyceae_unclassified	Dinophyceae_unclassified	Dinophyceae_unclassified	Dinophyceae_unclassified
OTU_5513	0.000168067	0.000289977	0.00157825	0.0011263	0.00187434	0.000525402	0	0	0	0.000141196	0	0	0.000726409	0	0	0	0	0	1.97e-05	0	0	4.61e-05	0	0	0	1.46e-05	0.000101754	0.00166237	0	0	0.000330524	0.000594595	0.00144026	4.42e-05	Eukaryota	Alveolata	Dinoflagellata	Dinophyceae	Gymnodiniales	Gymnodiniales_unclassified	Gymnodiniales_unclassified	Gymnodiniales_unclassified
OTU_15788	0.0142647	7.91e-05	0.000231477	0.000316773	0.000488958	0.000891592	0	0	0	0	0	0	0.000516868	0	0	0	0	0	0	0	0.000145188	1.54e-05	0	4.71e-05	0	0	0.000183158	0	0	0	0.00102462	4.69e-05	0.001856	0	Eukaryota	Alveolata	Dinoflagellata	Dinophyceae	Dinophyceae_unclassified	Dinophyceae_unclassified	Dinophyceae_unclassified	Dinophyceae_unclassified
OTU_649	0	0.000289977	0.000231477	4.4e-05	0.000434629	0.00159213	0	2.28e-05	0.000177211	0.00871883	0.00525628	0.00228833	0.00704058	0.027174	0	0	0	0	0	0	0	6.15e-05	0	0.000211815	1.54e-05	5.83e-05	0.000549473	0.00486244	7.03e-05	0	0	0.00134566	0.000371201	0.000884695	Eukaryota	Hacrobia	Haptophyta	Prymnesiophyceae	Prymnesiophyceae_unclassified	Prymnesiophyceae_unclassified	Prymnesiophyceae_unclassified	Prymnesiophyceae_unclassified
OTU_2224	0.0139916	7.91e-05	0.000294607	0.000334372	0.000325972	0.00191055	0	0.000216219	0	0	0	0	0.00106167	0	0	0	0	0	0	0	8.71e-05	0.00010759	0	7.06e-05	0	0	0.00209614	0.0013299	0	0	0.00366882	4.69e-05	0.0138681	0.000280153	Eukaryota	Alveolata	Dinoflagellata	Dinophyceae	Gymnodiniales	Gymnodiniaceae	Gyrodinium	Gyrodinium_helveticum
OTU_97	4.2e-05	0.000975378	0.00332485	0.00176865	0.00176568	0.00405993	3.65e-05	0	0	0.000582432	1.44e-05	0	0.00171824	0	0	0	0	1.78e-05	0	0	0	9.22e-05	0	9.41e-05	1.54e-05	1.46e-05	4.07e-05	8.31e-05	3.51e-05	0	0.000594943	0.00079801	0.000816642	0.000117959	Eukaryota	Alveolata	Dinoflagellata	Dinophyceae	Gymnodiniales	Gymnodiniaceae	Gymnodiniaceae_unclassified	Gymnodiniaceae_unclassified
OTU_2436	0	0.000448147	0.000715473	0.000985516	0.000787765	0.00479231	0	0	0	0	0	0.00858124	0.000628623	5.9e-05	0	0	0	0	3.95e-05	0	0	1.54e-05	1.36e-05	0	0	0	0	0.00340786	0	0	0	0.00278521	0.000118784	0.000250664	Eukaryota	Alveolata	Dinoflagellata	Dinophyceae	Dinophyceae_unclassified	Dinophyceae_unclassified	Dinophyceae_unclassified	Dinophyceae_unclassified
OTU_421	0.00052521	0.000790847	0.00178868	0.0011703	0.00271643	0.00117818	0	0	0	0.000547133	0.00040212	0.000173358	0.0130055	0	0	0	0	0	3.95e-05	0	0	0	0	0	0	1.46e-05	8.14e-05	0.00166237	0	0	0	0.000344239	0.00360807	0.000206429	Eukaryota	Alveolata	Dinoflagellata	Dinophyceae	Dinophyceae_unclassified	Dinophyceae_unclassified	Dinophyceae_unclassified	Dinophyceae_unclassified
OTU_307	0	0.0301313	0.00587109	0.012099	0.0263766	0	0	1.14e-05	0.00879238	0.0220618	0.0172624	0.0279107	0.00528044	0.0474011	0.006194	0	0	0	0	3.53e-05	2.9e-05	0.00118349	0.00061415	0	0.000245761	0.000320826	0.000427368	0.00149613	0.00080801	0	0	0	0.000460289	0.000132704	Eukaryota	Stramenopiles	Ochrophyta	Bacillariophyta	Bacillariophyta_X	Polar-centric-Mediophyceae	Chaetoceros	Chaetoceros_decipiens
OTU_178	0	0.0003427	0.000357737	0.000387167	0.000135822	0	0	4.55e-05	0	0	0.000876047	0	0.000405113	0.000212297	0	0	0	0	0	0	0	0	1.36e-05	0	0	0	6.11e-05	0.000207797	3.51e-05	0	0	0	0	0	Eukaryota	Rhizaria	Cercozoa	Filosa-Thecofilosea	Cryomonadida	Protaspa-lineage	Protaspa-lineage_X	Protaspa-lineage_X_sp.
OTU_1323	0	0	0	0	0	0	0	1.14e-05	0	0.00162375	0.00393503	0	0.0011874	0.0117353	0.00816007	0	0	0	0	0	0	0	1.36e-05	0	1.54e-05	4.37e-05	0	0	0	0	0	0	1.48e-05	0	Eukaryota	Opisthokonta	Choanoflagellida	Choanoflagellatea	Craspedida	Monosigidae_Group_B	Lagenoeca	Lagenoeca_antarctica
OTU_34	0.00176471	0.000237254	0.00107321	0.00214702	0	0	0	0.00442679	0	0.00199439	0.0148784	0	1.4e-05	0	0	0.000946778	0.000504826	0.000516023	0.000394758	3.53e-05	0	0	0	0	0	0	0	0	0	0	0	0	0	0	Eukaryota	Hacrobia	Katablepharidophyta	Katablepharidaceae	Katablepharidales	Katablepharidales_X	Katablepharidales_XX	Katablepharidales_XX_sp.
OTU_4371	0	0.000105446	4.21e-05	8.8e-05	8.15e-05	4.78e-05	0	0	0	0	0	0	0	2.36e-05	0	0	0	0	0	0	0	0	1.36e-05	2.35e-05	0	0	0	0	0	0	0	0	0	0	Eukaryota	Opisthokonta	Choanoflagellida	Choanoflagellida_unclassified	Choanoflagellida_unclassified	Choanoflagellida_unclassified	Choanoflagellida_unclassified	Choanoflagellida_unclassified
OTU_3767	0.000315126	0.000579955	0.000799646	0.000439963	0.000977915	0.000111449	0	0	0	0.000511834	0.000904769	0	0	0	0	0	0	0	0	0	0	0	0	0	0	0	6.11e-05	4.16e-05	0	0	0	0	0.000712705	1.47e-05	Eukaryota	Alveolata	Dinoflagellata	Dinophyceae	Dinophyceae_unclassified	Dinophyceae_unclassified	Dinophyceae_unclassified	Dinophyceae_unclassified
OTU_332	0	0.00192439	0.0133415	0.0227813	0.0137451	0.000461717	0	0	0	0.00443001	0.00116328	0	0.00363205	0.00181632	0	0.000315593	0	0	0	0.000158797	0.00013067	0.000215179	0.00189704	0.000847258	0.0014592	0.00335409	0.0036021	0	0.000316178	0	0.00257809	0	0.0126357	0	Eukaryota	Alveolata	Ciliophora	CONThreeP	CONThreeP_X	CONThreeP_XX	Askenasia	Askenasia_sp.
OTU_94	4.2e-05	0.000237254	0.000336693	0.00012319	0.000434629	0.00200608	0	0	0	0	1.44e-05	0	0	0	0	2.25e-05	0	0	0	0	0	0	0	0	0	0	4.07e-05	0	0	0	0	1.56e-05	0.000163328	2.95e-05	Eukaryota	Alveolata	Dinoflagellata	Dinophyceae	Gymnodiniales	Gymnodiniaceae	Gymnodiniaceae_unclassified	Gymnodiniaceae_unclassified
OTU_1179	0	2.64e-05	0	8.8e-05	5.43e-05	0.000589088	0	4.55e-05	0	0.00513599	0.00371961	0.00331114	0.00567158	0.00139172	0	0	0	0	0	0	0	9.22e-05	0.000150126	9.41e-05	7.68e-05	0.00043749	0.000305263	0.00261824	0	0	0	0	0.000400897	0.000501327	Eukaryota	Stramenopiles	Ochrophyta	Bacillariophyta	Bacillariophyta_X	Polar-centric-Mediophyceae	Attheya	Attheya_septentrionalis
OTU_174	0.000252101	0.000184531	2.1e-05	7.04e-05	0	0	0.000961527	7.97e-05	0	0	0	0	0	0	0	0	0.000397742	0.000124557	9.87e-05	0	0	0	0	0	0	0	0	0	0	0	0	0	0	0	Eukaryota	Archaeplastida	Chlorophyta	Chlorophyceae	Chlamydomonadales	Chlamydomonadales_X	Chlamydomonadales_X_unclassified	Chlamydomonadales_X_unclassified
OTU_511	0.000462185	0	2.1e-05	2.64e-05	0.000162986	0.00144884	1.22e-05	0	1.36e-05	0	0.000129253	0	0.00163442	0	0.000139191	0	0	0	0	0	0	0	5.46e-05	4.71e-05	6.14e-05	0.000335409	0.000183158	0	0	0	0	0.00017212	0.000861186	0.000132704	Eukaryota	Alveolata	Ciliophora	Spirotrichea	Strombidiida	Strombidiidae_M	Strombidiidae_M_X	Strombidiidae_M_X_sp.
OTU_1243	0.00115546	7.91e-05	0.000526083	0.00144308	0	0	0.000559876	0.00160457	0	0	0	0	0	0	0	0.0023444	0.00230996	0.000284703	3.95e-05	3.53e-05	0	0	0	0	0	0	0	0	0	0	0	0	0	0	Eukaryota	Stramenopiles	Ochrophyta	Chrysophyceae	Chrysophyceae_X	Chrysophyceae_Clade-B1	Chrysophyceae_Clade-B1_X	Chrysophyceae_Clade-B1_X_sp.
OTU_23127	0	5.27e-05	2.1e-05	5.28e-05	0.000407465	4.78e-05	0	0	0	7.06e-05	0.00010053	1.73e-05	5.59e-05	0	0	0	0	0	0	0	0	0	0	0	0	1.46e-05	0	0.000249356	0	0	0.00013221	3.13e-05	0.000282113	2.95e-05	Eukaryota	Alveolata	Dinoflagellata	Dinophyceae	Dinophyceae_unclassified	Dinophyceae_unclassified	Dinophyceae_unclassified	Dinophyceae_unclassified
OTU_3754	0.00107143	0.00197712	0.00271459	0.00197983	0.0102138	0.00235635	0	0	0	0.00100602	0.000631902	0.000450732	0.00177411	0	0	0	0	0	0	0	0	4.61e-05	1.36e-05	0.000564839	0	0	0.000386666	0.00374034	0	0	0	0.000923188	0.0105124	0.000486582	Eukaryota	Alveolata	Dinoflagellata	Dinophyceae	Gymnodiniales	Gymnodiniaceae	Gyrodinium	Gyrodinium_unclassified
OTU_1602	0	0.109111	0.0589213	0.0227461	0.0258876	0.00117818	0	0	0	0.00817169	0.0103115	0	0	0	0	0	0	0	0	0	0	0	0	0	0	0	2.04e-05	0	0	0	0	0	0	0.000457092	Eukaryota	Hacrobia	Cryptophyta	Cryptophyceae	Cryptophyceae_X	Cryptomonadales	Plagioselmis	Plagioselmis_prolonga
OTU_893	0	0	0	0	0	0	0	0	0.00963754	0.00121781	0	0	0	0	0	0	0	0	0	0	0	0.00172143	0.00883011	0.000423629	0.00016896	0.000787482	6.11e-05	0.00606766	7.03e-05	0	0	0	4.45e-05	0	Eukaryota	Alveolata	Ciliophora	CONTH_8	CONTH_8_X	CONTH_8_XX	CONTH_8_XXX	CONTH_8_XXX_sp.
OTU_4376	0.000252101	0.000369062	0.0017466	0.00146068	0.003803	0.00133739	0	0	1.36e-05	0	1.44e-05	0	0.00875882	0	0	0	0	0	0.000138165	0	1.45e-05	0	0	4.71e-05	0	0	0.000183158	0.00149613	0	0	0	0.000641537	0.00283597	0.000147449	Eukaryota	Alveolata	Dinoflagellata	Dinophyceae	Dinophyceae_unclassified	Dinophyceae_unclassified	Dinophyceae_unclassified	Dinophyceae_unclassified
OTU_22088	4.2e-05	0.000105446	0.00037878	0.000483959	0.000923587	0.000429875	0	0	0	0	0	0	0.000433052	0	0	0	0	0	1.97e-05	0	0	0	0	4.71e-05	0	0	8.14e-05	0.000997423	0	0	0	0.000234709	0.000786946	0.000103214	Eukaryota	Alveolata	Dinoflagellata	Dinophyceae	Dinophyceae_unclassified	Dinophyceae_unclassified	Dinophyceae_unclassified	Dinophyceae_unclassified
OTU_383	0	0	0	0	0	0	0	0	0	0	0	0	0	0.000648684	0.0139539	0	0	0	0	0	0	0	2.73e-05	0	0	1.46e-05	0	0	0	0	0	0	2.97e-05	0	Eukaryota	Rhizaria	Cercozoa	Filosa-Thecofilosea	Ebriida	TAGIRI1-lineage	TAGIRI1-lineage_X	TAGIRI1-lineage_X_sp.
OTU_4948	0	0.000632678	0.00115738	0.000695141	0.000651944	3.18e-05	0	0	0	0	0	0	0	0	0	0	0	0	0	1.76e-05	0	4.61e-05	0.000354842	0	0.00010752	0.000364575	0.000122105	0	0.000105393	0	0	0	0.000534529	0	Eukaryota	Alveolata	Ciliophora	CONThreeP	CONThreeP_X	CONThreeP_XX	Askenasia	Askenasia_sp.
OTU_2158	0	0	2.1e-05	3.52e-05	0.000135822	6.37e-05	0	0	0	0	0	0	0	0	0	0	0	0	0	0	1.45e-05	0	0	0	0	0	0	0	0	0	0	0	0.000133632	0	Eukaryota	Alveolata	Dinoflagellata	Dinophyceae	Gymnodiniales	Gymnodiniaceae	Gyrodinium	Gyrodinium_helveticum
OTU_986	0	2.64e-05	0	2.64e-05	0	0	0	3.41e-05	0	0	0	0	0	0	0	0.000518473	0.000703697	0.00126337	0.000473709	0	0	0	0	0	0	0	0	0	0	0	0	0	0	0	Eukaryota	Rhizaria	Cercozoa	Cercozoa_unclassified	Cercozoa_unclassified	Cercozoa_unclassified	Cercozoa_unclassified	Cercozoa_unclassified
OTU_41	0	0	4.21e-05	3.52e-05	5.43e-05	0.000111449	0	0	0	0	0.00106274	0	1.4e-05	0.000872775	0	0	0	0	1.97e-05	3.53e-05	0.000319415	0.00106053	0.000382138	0.000353024	0.00012288	0.0023187	0.00246245	0	0.000913402	0	0	0.00267568	0.003029	0.000324388	Eukaryota	Alveolata	Ciliophora	Spirotrichea	Strombidiida	Strombidiida_unclassified	Strombidiida_unclassified	Strombidiida_unclassified
OTU_1393	0	0	0	0	0	0	0	0	0	0.0209499	0.0230932	0	0.00194175	0.0010379	0	0	0	0	0	0	0	0	0	0	0	0	4.07e-05	0	0	0	0	0	0	2.95e-05	Eukaryota	Rhizaria	Cercozoa	Filosa-Imbricatea	Filosa-Imbricatea_X	Novel-clade-2	Novel-clade-2_X	Novel-clade-2_X_sp.
OTU_22889	0.0145798	0.000158169	0.00025252	0.000211182	0.000488958	0.0007483	0	0	0	0	0	0	0.000488929	0	0	0	0	0	0	0	0.000174226	4.61e-05	0	7.06e-05	0	0	0.000345964	0	0	0	0.000727153	1.56e-05	0.00240538	0	Eukaryota	Alveolata	Dinoflagellata	Dinophyceae	Gymnodiniales	Gymnodiniaceae	Gyrodinium	Gyrodinium_helveticum
OTU_2	0.000252101	0.000896294	0.00103112	0.000897524	0.00171135	0.00386887	0	1.14e-05	0	0	0.0010053	0	0.00600685	0	0.0014963	2.25e-05	0	8.9e-05	0	0	1.45e-05	4.61e-05	1.36e-05	0.000282419	0	7.29e-05	4.07e-05	0.004904	0	0	0	0.00378663	0.00132147	0.00265408	Eukaryota	Alveolata	Dinoflagellata	Dinophyceae	Peridiniales	Peridiniales_unclassified	Peridiniales_unclassified	Peridiniales_unclassified
OTU_2653	0	5.27e-05	0.00012626	4.4e-05	8.15e-05	0.000111449	0	0	0	0.00123546	0	0	0	0	0	0.000135254	0	0	0	0	0	0	0	0	0	0	0	0	0	0	0	0	0.00075725	0	Eukaryota	Alveolata	Dinoflagellata	Dinophyceae	Gymnodiniales	Gymnodiniaceae	Gymnodinium	Gymnodinium_sp.
OTU_5795	0	0.000395424	0.00178868	0.0011175	0.000325972	0.000334347	0	0	0	0.000123546	0	0	0.000349235	0	0	0	0	0	0	0	0	0	1.36e-05	0	0	0	0	0	0	0	0	0.000156472	0.000207872	0	Eukaryota	Alveolata	Dinoflagellata	Dinophyceae	Gymnodiniales	Gymnodiniales_unclassified	Gymnodiniales_unclassified	Gymnodiniales_unclassified
OTU_3278	0	0.000158169	4.21e-05	7.04e-05	0.000271643	0.00100304	0	1.14e-05	0	0.00395348	0.0024558	0.00150822	0.00463784	0.0107092	0	0	0	0	0	0	0	1.54e-05	2.73e-05	9.41e-05	0	5.83e-05	0.000223859	0.00328319	0	0	0	0.000610243	0.000178176	0.000235919	Eukaryota	Hacrobia	Haptophyta	Prymnesiophyceae	Prymnesiophyceae_Clade_F	Prymnesiophyceae_Clade_F_X	Prymnesiophyceae_Clade_F_XX	Prymnesiophyceae_Clade_F_XX_sp.
OTU_21561	0	0	0	0	8.15e-05	0	0	0	0	0.00155315	0.000933492	0.000225366	0.000279388	0.00271268	0	0	0	0	0	0	0	1.54e-05	1.36e-05	4.71e-05	0	0	4.07e-05	0	3.51e-05	0	0	0.000344239	8.91e-05	0.000162194	Eukaryota	Hacrobia	Haptophyta	Prymnesiophyceae	Prymnesiophyceae_Clade_F	Prymnesiophyceae_Clade_F_X	Prymnesiophyceae_Clade_F_XX	Prymnesiophyceae_Clade_F_XX_sp.
OTU_5440	0	2.64e-05	4.21e-05	0.000167186	8.15e-05	0	0	0	0	0.000600081	0	0	0	0	0	0	0	0	0	0	0	0.000322769	1.36e-05	0.000423629	4.61e-05	0	2.04e-05	0	0	0	0	0	0.000504833	0	Eukaryota	Alveolata	Dinoflagellata	Dinophyceae	Gymnodiniales	Gymnodiniales_unclassified	Gymnodiniales_unclassified	Gymnodiniales_unclassified
OTU_944	0	0.000210893	0.000799646	0.000519156	0.0019015	0.0026907	0	0	0	0	0	0	0	0	0	0	0	0	0	0	7.26e-05	0	0	4.71e-05	0	0	0	0	0	0	0.015766	0	0.000876034	0	Eukaryota	Alveolata	Dinoflagellata	Dinophyceae	Gymnodiniales	Gymnodiniaceae	Gymnodinium	Gymnodinium_sp.
OTU_23125	0.000840336	0.000105446	4.21e-05	0.00012319	0.000162986	0.000589088	0	0	0	0	0	0	0	0	0	0	0	0	0	0	2.9e-05	3.07e-05	0	2.35e-05	0	0	0.000671578	0.000166237	0	0	0.00135515	4.69e-05	0.00620648	0	Eukaryota	Alveolata	Dinoflagellata	Dinophyceae	Gymnodiniales	Gymnodiniaceae	Gyrodinium	Gyrodinium_unclassified
OTU_22470	0	0.000790847	0.00105217	0.000879925	0.000516122	0.000159213	0	0	0	0.000194144	0	0	0.000488929	0	0	0	0	0	0	0	0	3.07e-05	0	0	0	0	0	0	0	0	0.000264419	1.56e-05	0.000118784	0	Eukaryota	Alveolata	Dinoflagellata	Dinophyceae	Gymnodiniales	Gymnodiniaceae	Gymnodiniaceae_unclassified	Gymnodiniaceae_unclassified
OTU_1149	0	0.00224073	0.00168347	0.000695141	0.000733437	0	0	0	0	0	0	0	0	2.36e-05	1.74e-05	0	0	0	0	0	0	9.22e-05	4.09e-05	2.35e-05	4.61e-05	2.92e-05	0	4.16e-05	0	0	0	3.13e-05	2.97e-05	2.95e-05	Eukaryota	Alveolata	Ciliophora	Spirotrichea	Strombidiida	Strombidiidae_R	Strombidiidae_R_unclassified	Strombidiidae_R_unclassified
OTU_117	2.1e-05	0	8.42e-05	0.000809531	2.72e-05	0	0	0.00355054	0	0	0	0	0	0	0	0	0	0.000249115	0	0	5.81e-05	0	0	0	0	0	0	0	0	0	0	0	0	0	Eukaryota	Alveolata	Ciliophora	Oligohymenophorea	Peritrichia_2	Sessilida	Vorticella	Vorticella_convallaria
OTU_1379	0	0	0	1.76e-05	0	0	0	0	0	0.00554193	0.00525628	0.00852923	1.4e-05	0.000377416	0	0	0	0	3.95e-05	0.000141153	0	0.000430359	0.000464024	0.000564839	0.0001536	0.000204162	4.07e-05	0	0.000210785	0	0	0	0	0	Eukaryota	Stramenopiles	Ochrophyta	Bacillariophyta	Bacillariophyta_X	Polar-centric-Mediophyceae	Skeletonema	Skeletonema_marinoi
OTU_543	0	0	0	8.8e-06	0	0	0	0	0.00167669	0	0	0	0.00368792	0.00305471	0	0	0	0	0	0	0	0	0.000191069	0	0	0.00125414	0.000183158	0.0101405	3.51e-05	0	0	0.00104837	0.000608769	0.00212327	Eukaryota	Rhizaria	Cercozoa	Filosa-Thecofilosea	Cryomonadida	Cryothecomonas-lineage	Cryothecomonas-lineage_X	Cryothecomonas-lineage_X_sp.
OTU_57	4.2e-05	0.00108083	0.00408241	0.00256058	0.00195583	0.00304097	1.22e-05	0	0	0.000600081	0	0	0.00360411	0	0	0.00112712	0	0	3.95e-05	0	0	4.61e-05	2.73e-05	0	3.07e-05	1.46e-05	0.000122105	0	0	0	6.61e-05	0.000751068	0.0011136	0	Eukaryota	Alveolata	Dinoflagellata	Dinophyceae	Gymnodiniales	Gymnodiniaceae	Gymnodinium	Gymnodinium_dorsalisulcum
OTU_6767	0.00012605	5.27e-05	0.000105217	3.52e-05	0.000217315	0.000525402	0	0.000705556	0	0	0	0	0	0	0	0	0	0	0	0	0	1.54e-05	0	0.000258884	0	0	0.00238105	0.000498712	0	0	0	0	0.00859701	0	Eukaryota	Alveolata	Dinoflagellata	Dinophyceae	Dinophyceae_unclassified	Dinophyceae_unclassified	Dinophyceae_unclassified	Dinophyceae_unclassified
OTU_4362	0	0.000131808	6.31e-05	2.64e-05	0	0	0	0	0	0	0	0	0	0	0	0	0	0	0	0	0	0.00010759	0.000204717	2.35e-05	0.000215041	0.000262494	0	0	0.000526963	0	0	0	0.000103936	1.47e-05	Eukaryota	Alveolata	Ciliophora	Spirotrichea	Strombidiida	Strombidiidae_R	Strombidium_R	Strombidium_R_unclassified
OTU_23405	0	0	2.1e-05	8.8e-05	8.15e-05	0.000429875	0	0	0.00117232	0.00192379	0.00248453	0.0076451	0.00498708	0.0177268	0.00979556	0	0	0	0	0	0.000145188	1.54e-05	5.46e-05	0.000282419	7.68e-05	0.00123956	0.000997192	0.00253512	0.000105393	0	0.000429681	0.00222191	0.000475137	0.00134179	Eukaryota	Opisthokonta	Choanoflagellida	Choanoflagellatea	Acanthoecida	Stephanoecidae_Group_H	Stephanoecidae_Group_H_unclassified	Stephanoecidae_Group_H_unclassified
OTU_1058	0.000147059	7.91e-05	8.42e-05	7.04e-05	0	0	0	0	0	0	0	0	0	0	0	4.51e-05	0.000107084	1.78e-05	1.97e-05	0	0	0	0	0	0	0	0	0	0	0	0	0	0	0	Eukaryota	Stramenopiles	Ochrophyta	Synurophyceae	Synurales	Synurales_X	Synurales_XX	Synurales_XX_sp.
OTU_229	0.000336134	0.000184531	0.00012626	0.000219981	0	0	0.00163094	0.000682796	0	0	0	0	0	0	0	0.00110457	0.00116263	0	1.97e-05	0	0	0	0	0	0	0	0	0	0	0	0	0	0	0	Eukaryota	Stramenopiles	Ochrophyta	Chrysophyceae	Chrysophyceae_X	Chrysophyceae_Clade-B2	Chrysophyceae_Clade-B2_unclassified	Chrysophyceae_Clade-B2_unclassified
OTU_3567	0	0.0003427	0.000105217	4.4e-05	0.000298807	0.000111449	0	1.14e-05	0	0.000988369	0.000646264	8.67e-05	0.00792065	0.00107328	0.000400174	0	0	5.34e-05	1.97e-05	7.06e-05	2.9e-05	0.000215179	5.46e-05	0.00129442	1.54e-05	4.37e-05	4.07e-05	0.002452	0.000140523	0.000404291	0.000594943	0.00170555	0.000371201	7.37e-05	Eukaryota	Archaeplastida	Chlorophyta	Mamiellophyceae	Mamiellales	Mamiellaceae	Micromonas	Micromonas_unclassified
OTU_670	6.3e-05	0.000369062	0.000736516	0.000651145	0.00162986	0.000684615	0	0	0	0	0	0	0.010505	0	0	0	0	0	0	0	0	0	0	0.00221229	0	0	4.07e-05	0	0	0	0	0	0.000489985	0	Eukaryota	Alveolata	Dinoflagellata	Dinophyceae	Gymnodiniales	Gymnodiniaceae	Gyrodinium	Gyrodinium_unclassified
OTU_272	0	7.91e-05	6.31e-05	1.76e-05	0.000461793	0.00143292	0	0	0	0	0	0	0	0	0	0	0	0	0	0	0	0	0	0	0	0	0	0	0	0	0	0.00211238	0.000579073	0	Eukaryota	Stramenopiles	Stramenopiles_X	MAST	MAST-1	MAST-1C	MAST-1C_X	MAST-1C_X_sp.
OTU_21431	2.1e-05	0	6.31e-05	3.52e-05	0.000108657	0.000334347	0	0	0	0	0	0	0	0	0	0	0	0	0	0	0.000101632	1.54e-05	0	0.00014121	0	0	0.00122105	0.000415593	0	0	3.31e-05	0	0.00449895	0	Eukaryota	Alveolata	Dinoflagellata	Dinophyceae	Dinophyceae_unclassified	Dinophyceae_unclassified	Dinophyceae_unclassified	Dinophyceae_unclassified
OTU_122	0	0.000131808	0.00037878	0.000316773	0.000488958	0.00186279	0	0	0	0	0	0.00270439	0.000111755	2.36e-05	0	0	0	0.000551611	3.95e-05	0	0	0	2.73e-05	7.06e-05	0	0	0	0.00182861	0	0	0	0.00117354	0.000237568	0.000457092	Eukaryota	Alveolata	Dinoflagellata	Dinophyceae	Dinophyceae_unclassified	Dinophyceae_unclassified	Dinophyceae_unclassified	Dinophyceae_unclassified
OTU_725	0.00340336	0.00050087	0.00147303	0.0024022	0	0	0.00119278	0.000204839	0	0	0	0	0	0	0	0.000811524	0.00120852	1.78e-05	0	0	0	0	0	0	0	0	0	0	0	0	0	0	0	0	Eukaryota	Stramenopiles	Ochrophyta	Chrysophyceae	Chrysophyceae_X	Chrysophyceae_Clade-E	Chrysophyceae_Clade-E_unclassified	Chrysophyceae_Clade-E_unclassified
OTU_907	0	0.00253071	0.00349319	0.00219101	0.00103224	0	0	0	0.000354421	0.00285921	0.00679295	0.000485403	0.000405113	1.18e-05	0.00015659	0	0	0	0	1.76e-05	0	0	0.00036849	0	0	4.37e-05	0.00113965	0	0.000175654	0	0	0	0.000207872	0	Eukaryota	Alveolata	Ciliophora	Spirotrichea	Strombidiida	Tontoniidae_A	Laboea	Laboea_strobila
OTU_881	0	0.000527232	0.000610257	0.000888725	0.000787765	0.00302504	0	0	0	0	0	0	0.00188587	0.00417517	0	0	0	0	0	0	0	1.54e-05	4.09e-05	0.000400094	3.07e-05	4.37e-05	0.000590175	0	0	0	0	0	0.00133632	0.00126806	Eukaryota	Opisthokonta	Choanoflagellida	Choanoflagellatea	Acanthoecida	Stephanoecidae_Group_D	Stephanoecidae_Group_D_X	Stephanoecidae_Group_D_X_sp.
OTU_44	0	0.000210893	0.000336693	0.000563152	0.0003803	0	0	0	0	0.00533013	0.00274303	0.0109389	0	0.00372699	0	0	0	0	1.97e-05	7.06e-05	4.36e-05	0.000322769	0.000955344	0.00447164	0.000967682	0.00102081	0.00144491	0.00423905	3.51e-05	0	0	0	0.00155904	0	Eukaryota	Rhizaria	Cercozoa	Filosa-Thecofilosea	Cryomonadida	Protaspa-lineage	Protaspa-lineage_X	Protaspa-lineage_X_sp.
OTU_2006	0.00189076	7.91e-05	0.000147303	0.000211182	0.000896422	0.00853381	3.65e-05	0	0.00169032	0	0.00363344	0	2.79e-05	0.000401005	0.000365376	0	0	0.000124557	0	0.000141153	4.36e-05	6.15e-05	0.000709684	7.06e-05	0.000215041	0.00191037	0.00311368	0	0.000386439	0	0.000231367	0.00062589	0.0041723	0.000353878	Eukaryota	Alveolata	Ciliophora	Spirotrichea	Strombidiida	Strombidiidae_M	Strombidiidae_M_unclassified	Strombidiidae_M_unclassified
OTU_2991	0	0.00084357	0.000210433	0.00012319	0.000516122	3.18e-05	0	0	0	0	0	0	1.4e-05	0	0	0	0	0	0	0	0	1.54e-05	0	0.00018828	4.61e-05	1.46e-05	0	0	0	0	0	1.56e-05	0	0	Eukaryota	Alveolata	Dinoflagellata	Dinophyceae	Dinophyceae_unclassified	Dinophyceae_unclassified	Dinophyceae_unclassified	Dinophyceae_unclassified
OTU_578	0	7.91e-05	0	2.64e-05	0.000108657	0.00156029	0	0	0	0	0	0	0	0	0	0	0	0	0	0	0	0	0	0	0	0	0	0	0	0	0	0	0	0	Eukaryota	Hacrobia	Picozoa	Picozoa_X	Picozoa_XX	Picozoa_XXX	Picozoa_XXXX	Picozoa_XXXX_sp.
OTU_1050	0	0	0	8.8e-06	0	0	0	0.000944534	0.00672037	0	0	0	0	0	0	0	0	0	0	0	0	0	0	0	0	0	0	0	0	0	0	0	0	0	Eukaryota	Alveolata	Ciliophora	Phyllopharyngea	Suctoria	Evaginogenida	Evaginogenida_X	Evaginogenida_X_sp.
OTU_1116	0	0	0	0	0	0	0	2.28e-05	0	0	0	0	0	0	0	0	0	0.000231321	0.000177641	0	0	1.54e-05	0	0	0	0	0	0	0	0	0	0	0	0	Eukaryota	Archaeplastida	Chlorophyta	Chlorophyceae	Chlamydomonadales	Chlamydomonadales_X	Neochlorosarcina	Neochlorosarcina_negevensis
OTU_751	2.1e-05	7.91e-05	0.000336693	0.000615948	0	0	0.000267767	1.14e-05	0	0	0	0	0	0	0	0	0	3.56e-05	3.95e-05	0	0	0	0	0	0	0	0	0	0	0	0	0	0	0	Eukaryota	Stramenopiles	Stramenopiles_X	Oomycota	Oomycota_X	Saprolegniales	Saprolegnia	Saprolegnia_parasitica
OTU_3010	0	5.27e-05	0.00031565	0.000193584	0.00124956	0.000254741	0	0	0	0	0	0	1.4e-05	0	0	2.25e-05	0	0	0	0	0	1.54e-05	0	4.71e-05	0	1.46e-05	0	0	0	0	0	6.26e-05	5.94e-05	1.47e-05	Eukaryota	Alveolata	Dinoflagellata	Dinophyceae	Gymnodiniales	Gymnodiniales_unclassified	Gymnodiniales_unclassified	Gymnodiniales_unclassified
OTU_843	0	0.000105446	0.000168347	0.000202383	0.000325972	0.000191055	0	0	0.000231737	7.06e-05	0.00147923	0	0	0.000377416	0.000243584	0	0	0	0	0	0	3.07e-05	4.09e-05	2.35e-05	0	1.46e-05	6.11e-05	0	0	0.00140154	0.000165262	0.000297298	7.42e-05	0	Eukaryota	Stramenopiles	Stramenopiles_X	MAST	MAST-8	MAST-8A	MAST-8A_X	MAST-8A_X_sp.
OTU_5750	0.000231092	0.000606316	0.000357737	0.000272777	0.000298807	0.000238819	0	0	0	0.000176494	0.000287228	0	0	0	0	0	0	0	1.97e-05	0	0	0	0	0	0	0	2.04e-05	0	0	0	0	1.56e-05	0.000207872	0	Eukaryota	Alveolata	Dinoflagellata	Dinophyceae	Gymnodiniales	Gymnodiniaceae	Gyrodinium	Gyrodinium_unclassified
OTU_3318	0	0.000316339	0.000231477	0.000105591	0.000162986	1.59e-05	0	0	0	0	0	0	0	0	0	0	0	0	0	0	0	1.54e-05	0	4.71e-05	0	1.46e-05	0	0	0	0	0	0	0	0	Eukaryota	Alveolata	Dinoflagellata	Dinophyceae	Gymnodiniales	Gymnodiniales_unclassified	Gymnodiniales_unclassified	Gymnodiniales_unclassified
OTU_177	0	0.00155533	0.0030092	0.002367	0.00130389	0	0	0	2.73e-05	1.76e-05	0.000315951	0	0	0	0.000104393	0	0	0	0	1.76e-05	0	0	0.000518616	0	0	0.000116664	0.000569824	0	0.00042157	0	0	0	0.000133632	0	Eukaryota	Alveolata	Ciliophora	Spirotrichea	Strombidiida	Tontoniidae_A	Tontoniidae_A_X	Tontoniidae_A_X_sp.
OTU_1253	0	0	0	0	8.15e-05	0	0	0	0.00128137	0.00112956	0	0	0	0.000330239	0	0	0	0	0	0	0	0	0	0	0	0	0	0	0	0	0	0	0	0	Eukaryota	Stramenopiles	Stramenopiles_X	Oomycota	Oomycota_X	Oomycota_X_unclassified	Oomycota_X_unclassified	Oomycota_X_unclassified
OTU_1500	0	0.000131808	2.1e-05	7.92e-05	2.72e-05	0	0	0	0	0	0	0	0	0	0	0	0	0	0	0.000670478	1.45e-05	0.000230549	0.00121465	2.35e-05	1.54e-05	0.00139997	4.07e-05	4.16e-05	0.000175654	0	0	0	8.91e-05	8.85e-05	Eukaryota	Alveolata	Ciliophora	Spirotrichea	Strombidiida	Strombidiida_unclassified	Strombidiida_unclassified	Strombidiida_unclassified
OTU_3074	0	2.64e-05	2.1e-05	1.76e-05	2.72e-05	0.000111449	0	1.14e-05	0	0.00338869	0.00198188	0.000398724	0.000726409	0.00580278	0	0	0	0	0	0	0	3.07e-05	1.36e-05	4.71e-05	0	1.46e-05	8.14e-05	0	3.51e-05	0	0	0.000594595	5.94e-05	0.000176939	Eukaryota	Hacrobia	Haptophyta	Prymnesiophyceae	Prymnesiophyceae_Clade_F	Prymnesiophyceae_Clade_F_X	Prymnesiophyceae_Clade_F_XX	Prymnesiophyceae_Clade_F_XX_sp.
OTU_5663	0	0.000711763	0.000336693	0.000316773	8.15e-05	0	0	0	0.00136316	0.00195909	0.000732432	0	0	0	0	0.000315593	0	0	0	0.00238196	0.000522678	0.00954474	0.00917131	0.00263591	0.000568321	0.0119581	0.000549473	0.0155847	0.0014755	0	0	0.00159602	0.000965122	0.00116485	Eukaryota	Alveolata	Ciliophora	Spirotrichea	Strombidiida	Strombidiidae_R	Strombidiidae_R_X	Strombidiidae_R_X_sp.
OTU_319	0	2.64e-05	0	8.8e-06	0	0.00103488	0	0	0	0	0	0	0	0.0037034	0.00344498	0	0	0	0	0	0	0.000614798	0	7.06e-05	0	1.46e-05	0	0.00207797	0	0	0.00241282	0.0011266	1.48e-05	0.000176939	Eukaryota	Opisthokonta	Choanoflagellida	Choanoflagellatea	Acanthoecida	Stephanoecidae_Group_D	Stephanoecidae_Group_D_X	Stephanoecidae_Group_D_X_sp.
OTU_21966	0	0.000105446	0.00044191	0.000228781	8.15e-05	4.78e-05	0	0	0	0	0	0	0	0	0	0	0	0	0	1.76e-05	0	0	0	0	0	0	0	0	0	0	0	0	0	0	Eukaryota	Alveolata	Dinoflagellata	Dinophyceae	Peridiniales	Peridiniales_unclassified	Peridiniales_unclassified	Peridiniales_unclassified
OTU_21515	0.0438655	0.000237254	0.000462953	0.000747937	0.000977915	0.00259517	0	0	0	0	0	0	0.00127122	0	0	0	0	0	0	0	0.000319415	9.22e-05	0	9.41e-05	0	0	0.000305263	0	0	0	0.00244588	0	0.00366746	0	Eukaryota	Alveolata	Dinoflagellata	Dinophyceae	Gymnodiniales	Gymnodiniaceae	Gyrodinium	Gyrodinium_unclassified
OTU_778	0	0	0	8.8e-06	0	0	3.65e-05	0.000273118	0	0	0	0	0	0	0	0.00985099	0.00871973	3.56e-05	1.97e-05	0	0	0	0	0	0	0	0	0	0	0	0	0	0	0	Eukaryota	Stramenopiles	Ochrophyta	Chrysophyceae	Chrysophyceae_X	Chrysophyceae_Clade-F	Chrysophyceae_Clade-F_unclassified	Chrysophyceae_Clade-F_unclassified
OTU_22255	4.2e-05	0.000316339	0.000294607	0.000307974	0.000325972	0.00191055	0	0	0	0.000105897	7.18e-05	0	0.0094992	0	0	0	0	0	0	0	0	1.54e-05	0	0.000447164	0	0	2.04e-05	0.00203641	0	0	0	0.00123613	0.000193024	0.000958419	Eukaryota	Alveolata	Dinoflagellata	Dinophyceae	Dinophyceae_unclassified	Dinophyceae_unclassified	Dinophyceae_unclassified	Dinophyceae_unclassified
OTU_22372	0.000105042	7.91e-05	0.000105217	0.00011439	0.000217315	0.000175134	0	0	0	0	0	0	0	0	0	0	0	0	0	0	0	0	0	0.000117675	0	0	0.000223859	0.000166237	0	0	0	0	0.00250932	0	Eukaryota	Alveolata	Dinoflagellata	Dinophyceae	Gymnodiniales	Gymnodiniaceae	Gyrodinium	Gyrodinium_helveticum
OTU_980	0	0.013998	0.0507565	0.0294247	0.0195855	0.00221306	0	0	0.000177211	0	0.000876047	0.00173358	4.19e-05	0	0	0.000653727	0	0	0.000256592	0.00691651	0.000116151	0.00230549	0.00315264	0	0.000552961	0.000306243	0.00024421	0	7.03e-05	0	0	0.00139261	0.000400897	0.000339133	Eukaryota	Alveolata	Ciliophora	Ciliophora_X	Ciliophora_XX	Ciliophora_XXX	Mesodinium	Mesodinium_unclassified
OTU_21492	0.000147059	0	2.1e-05	6.16e-05	0	0	0	2.28e-05	0	0	0	5.2e-05	0	0	0	2.25e-05	6.12e-05	1.78e-05	0	0	0	0	0	0	0	0	0	0	0	0	0	0	0	0	Eukaryota	Alveolata	Dinoflagellata	Dinophyceae	Suessiales	Suessiaceae	Asulcocephalium	Asulcocephalium_miricentonis
OTU_571	0	2.64e-05	0	0	0	0.000382111	0	0	0	0	0	0	0	0	0	0	0	0	0	0	0	0	0	0	0	0	0	0	0	0	0	0	0	0	Eukaryota	Rhizaria	Cercozoa	Filosa-Thecofilosea	Ventricleftida	CCW10-lineage	CCW10-lineage_X	CCW10-lineage_X_sp.
OTU_8114	0.00012605	0	0	0	0	7.96e-05	0	0	0	0	0	0	0	0	0	0	0	0	0	0	2.9e-05	0	0	0	0	0	0.000203508	0	0	0	0	1.56e-05	0.00224205	0	Eukaryota	Alveolata	Dinoflagellata	Dinophyceae	Gymnodiniales	Gymnodiniaceae	Gyrodinium	Gyrodinium_unclassified
OTU_168	0	0	0	0	0	0	0	0	0	0	0	0	0	0.00741859	0	0	0	0	0	0	0	0	0	0	0	0	0	0	0	0	0	0	0	0	Eukaryota	Rhizaria	Cercozoa	Filosa-Imbricatea	Filosa-Imbricatea_X	Novel-clade-2	Novel-clade-2_X	Novel-clade-2_X_sp.
OTU_2145	0	0	0	0	5.43e-05	0.00261109	0	0	0.000518001	0	0	0	0	0	0.00107873	0	0	0	0	0	0	0.000261289	0.000409433	0	3.07e-05	2.92e-05	0.000203508	0	0.000245916	0	0	0.000375534	0.00105421	0.000825715	Eukaryota	Alveolata	Ciliophora	Spirotrichea	Choreotrichida	Leegaardiellidae_B	Leegaardiella	Leegaardiella_sp.
OTU_23048	0	0	4.21e-05	0	0.000108657	0.000191055	0	0	0	0	0	1.73e-05	0	0	0	0	0	0	0	0	0	0	0	0	0	0	0	0	0	0	0	0.000406828	0.000178176	0	Eukaryota	Alveolata	Dinoflagellata	Dinophyceae	Dinophyceae_unclassified	Dinophyceae_unclassified	Dinophyceae_unclassified	Dinophyceae_unclassified
OTU_1650	0.0583193	5.27e-05	0.000147303	0.000281576	0.000325972	0.00108265	0	0	0	0	0	0	0.000447021	0	0	0	0	0	0	0	7.26e-05	4.61e-05	0	7.06e-05	0	0	8.14e-05	0	0	0	0.000561891	1.56e-05	0.000801794	0	Eukaryota	Alveolata	Dinoflagellata	Dinophyceae	Gymnodiniales	Gymnodiniaceae	Gyrodinium	Gyrodinium_helveticum
OTU_1554	0	0	6.31e-05	0	5.43e-05	0.000429875	0	0	0	0	0	0.00136953	0	0.00147428	0	0	0	0	0	0	0	0	0	0	0	0	0	0	0	0	0	0	0	2.95e-05	Eukaryota	Hacrobia	Centroheliozoa	Centroheliozoa_X	Pterocystida	Pterocystida_X	Pterocystida_XX	Pterocystida_XX_sp.
OTU_23007	0	2.64e-05	2.1e-05	0.00023758	5.43e-05	0.000668694	0	1.14e-05	0.00148584	0.00300041	0.0034611	0.0106442	0.00741775	0.0271504	0.012475	0	0	0	0	0	7.26e-05	0	0.000136478	0.000517769	0.00012288	0.00207079	0.00126175	0.00315851	0.000105393	0	0.000561891	0.00372405	0.000683009	0.00193158	Eukaryota	Opisthokonta	Choanoflagellida	Choanoflagellatea	Acanthoecida	Stephanoecidae_Group_H	Stephanoecidae_Group_H_unclassified	Stephanoecidae_Group_H_unclassified
OTU_5761	0	2.64e-05	0	8.8e-06	5.43e-05	0.000206977	0	0	0	0.0031416	0.000359035	0.000710769	0.000321296	0.00186349	0	0	0	0	0	0	0	0	0	4.71e-05	0	0	0	0	0	0	0	0.00222191	0	0	Eukaryota	Alveolata	Dinoflagellata	Syndiniales	Dino-Group-I	Dino-Group-I-Clade-1	Dino-Group-I-Clade-1_X	Dino-Group-I-Clade-1_X_sp.
OTU_4478	0	0	2.1e-05	8.8e-06	8.15e-05	0.000429875	0	0	0	0.00351224	0.00030159	0.000884127	0.000502899	0.00248859	0	0	0	0	0	0	0	1.54e-05	0	0	1.54e-05	0	4.07e-05	0	0.000105393	0	0	0.000485065	0	0	Eukaryota	Alveolata	Dinoflagellata	Syndiniales	Dino-Group-I	Dino-Group-I-Clade-1	Dino-Group-I-Clade-1_X	Dino-Group-I-Clade-1_X_sp.
OTU_3915	0.000630252	0.00231982	0.00246207	0.00172465	0.00679108	0.00364597	0	0	0	0.000423587	0.000129253	0.000156022	0.00141091	0	0	0	0	0	5.92e-05	0	0	6.15e-05	1.36e-05	0	1.54e-05	0	0.000122105	0.0022442	0	0	0	0.000641537	0.00745371	0.000280153	Eukaryota	Alveolata	Dinoflagellata	Dinophyceae	Gymnodiniales	Gymnodiniaceae	Gymnodiniaceae_unclassified	Gymnodiniaceae_unclassified
OTU_19712	0.0113866	0.000105446	0.00044191	0.000290375	0.000407465	0.00140107	0	0.000557617	0	0	0	0	0.000614654	0	0	0	0	0	0	0	0.000145188	7.68e-05	0	0.000164745	0	0	0.00160772	0.000872745	0	0	0.0020823	3.13e-05	0.01075	0.000132704	Eukaryota	Alveolata	Dinoflagellata	Dinophyceae	Gymnodiniales	Gymnodiniaceae	Gyrodinium	Gyrodinium_unclassified
OTU_7402	2.1e-05	2.64e-05	0	2.64e-05	0	0	0.0554399	0.00490475	1.36e-05	1.76e-05	0	0	0	0	1.74e-05	0.000518473	0.00182044	0.000124557	7.9e-05	1.76e-05	0	0	0	0	0	0	0	0	0	0	0	0	0	0	Eukaryota	Stramenopiles	Ochrophyta	Chrysophyceae	Chrysophyceae_X	Chrysophyceae_Clade-C	Chrysophyceae_Clade-C_unclassified	Chrysophyceae_Clade-C_unclassified
OTU_7456	0.000168067	5.27e-05	0	8.8e-06	0	0	0	0	0	0	0	0	0	0	0	0.000225423	0	0	0	0	0	0	0	0	0	0	0	0	0	0	0	0	0	0	Eukaryota	Stramenopiles	Ochrophyta	Chrysophyceae	Chrysophyceae_X	Chrysophyceae_Clade-F	Chrysophyceae_Clade-F_unclassified	Chrysophyceae_Clade-F_unclassified
OTU_460	0	0	0	0	0	0	0	0	0	0	0	0	0	0	0	0	0	0	0	0	0	3.07e-05	6.82e-05	0	0	0.000320826	0.00113965	0	0.000316178	0	0	0	0.00126208	0	Eukaryota	Alveolata	Dinoflagellata	Dinophyceae	Peridiniales	Amphidiniopsidaceae	Islandinium	Islandinium_tricingulatum
OTU_2027	0	0	0	0	0	0.000238819	0	0	0	0	0	0	0	0	0	0	0	0	0	0	0	0	0	0	0	0	0.000936139	0	0	0	0	0	0.00540468	0	Eukaryota	Alveolata	Dinoflagellata	Dinophyceae	Dinophyceae_unclassified	Dinophyceae_unclassified	Dinophyceae_unclassified	Dinophyceae_unclassified
OTU_5126	0	5.27e-05	8.42e-05	8.8e-05	0.000244479	0.000413953	0	0	1.36e-05	0	4.31e-05	0	1.4e-05	1.18e-05	0	0	0	0	0	0	0	0	0	0	0	1.46e-05	0	0	0	0	0	0	0	1.47e-05	Eukaryota	Opisthokonta	Choanoflagellida	Choanoflagellida_unclassified	Choanoflagellida_unclassified	Choanoflagellida_unclassified	Choanoflagellida_unclassified	Choanoflagellida_unclassified
OTU_2611	0.000105042	0.00189803	0.00155721	0.000483959	0.000488958	0.000111449	0	0	0	0	0	0	0	0	0	0	0	0	0	0	0	0	0	0	0	0	0	0	0	0	0	0	7.42e-05	0	Eukaryota	Alveolata	Dinoflagellata	Dinophyceae	Dinophyceae_unclassified	Dinophyceae_unclassified	Dinophyceae_unclassified	Dinophyceae_unclassified
OTU_706	0.000273109	5.27e-05	0.000147303	4.4e-05	0	7.96e-05	0	0.00108109	0.000313527	0.00112956	0.000689348	0.000121351	0	4.72e-05	0.00187908	0.00241203	0.00234056	0.000124557	7.9e-05	7.06e-05	0	4.61e-05	6.82e-05	2.35e-05	9.22e-05	1.46e-05	6.11e-05	0	0.000351309	0	0	0	1.48e-05	0	Eukaryota	Stramenopiles	Ochrophyta	Chrysophyceae	Chrysophyceae_X	Chrysophyceae_Clade-F	Chrysophyceae_Clade-F_unclassified	Chrysophyceae_Clade-F_unclassified
OTU_4612	0	0.000105446	8.42e-05	6.16e-05	0.000271643	9.55e-05	0	0	0	0	0	0	0	0	0	0	0	0	0	0	0	3.07e-05	0	0	0	0	0	0	0	0	0	0	0	0	Eukaryota	Alveolata	Dinoflagellata	Dinophyceae	Gymnodiniales	Gymnodiniaceae	Gyrodinium	Gyrodinium_unclassified
OTU_2495	0	0.0190067	0.033038	0.0133221	0.00182001	3.18e-05	0	0	0	0.000247092	0	0	0	0	0	2.25e-05	0	1.78e-05	1.97e-05	0.000582257	0.000392009	0.00147552	0.00024566	0	0.000353281	1.46e-05	0.000630876	0.00290915	0.000316178	0	0	3.13e-05	0.000341505	0	Eukaryota	Alveolata	Dinoflagellata	Dinophyceae	Peridiniales	Heterocapsaceae	Heterocapsa	Heterocapsa_rotundata
OTU_6397	0	0.000579955	0.00018939	0.000105591	2.72e-05	0.000159213	0	0	0.0013359	0.000352989	4.31e-05	0.000190694	0	0	0.00118312	2.25e-05	0	0	3.95e-05	0	0.000101632	0.000276659	2.73e-05	0.000800188	0.00013824	0	0.000407017	0.00274291	7.03e-05	0.000781629	0	0.00133002	0.000356353	0.000427602	Eukaryota	Hacrobia	Cryptophyta	Cryptophyceae	Cryptophyceae_X	Cryptomonadales	Teleaulax	Teleaulax_gracilis
OTU_440	0	0.000527232	0.00122051	0.00219101	0.00214598	0	0	0	0	0.00271801	0.00353291	0	0	0	0	0	0	0	0	0	0	0	0	0	0	1.46e-05	0	0	0	0	0	0	0	0	Eukaryota	Rhizaria	Cercozoa	Filosa-Thecofilosea	Cryomonadida	Protaspa-lineage	Protaspa-lineage_X	Protaspa-lineage_X_sp.
OTU_5	0.000168067	0.000316339	0.0006313	0.000686342	0.00220031	0.000652773	0	0	0	0.000282391	1.44e-05	0	5.59e-05	0	0	0	0	0	0	0	0	0.00012296	0	0.000211815	0	0	4.07e-05	4.16e-05	0	0	0	6.26e-05	0.000668161	2.95e-05	Eukaryota	Alveolata	Dinoflagellata	Dinophyceae	Dinophyceae_unclassified	Dinophyceae_unclassified	Dinophyceae_unclassified	Dinophyceae_unclassified
OTU_2812	0	0.000131808	0.00069443	0.000413565	0.0003803	7.96e-05	0	0	0	0	0	8.67e-05	1.4e-05	0	0	0	0	0	1.97e-05	0.000441104	2.9e-05	0.000184439	0.000191069	0	3.07e-05	1.46e-05	2.04e-05	0	0	0	0	7.82e-05	0	4.42e-05	Eukaryota	Alveolata	Ciliophora	Ciliophora_X	Ciliophora_XX	Ciliophora_XXX	Mesodinium	Mesodinium_rubrum
OTU_8095	0.000105042	2.64e-05	0	0	0	0	0	0.000819355	0.000708843	0	0	0	0	0	0	0.00227677	0.00189692	0.00346981	0.000236855	5.29e-05	0.000333933	0	0	0	0	0	0	0	0	0	0	0	0	0	Eukaryota	Rhizaria	Cercozoa	Novel-clade-10-12	Novel-clade-10	Novel-clade-10_X	Novel-clade-10_XX	Novel-clade-10_XX_sp.
OTU_23105	0	2.64e-05	0.000105217	5.28e-05	0.000135822	0.000111449	0	0	0	0.000405937	0	0	0	0	0	0	0	0	0	0	0	0.00010759	1.36e-05	0.000164745	7.68e-05	0	0	0	0	0	0	0.00017212	0.00022272	0	Eukaryota	Alveolata	Dinoflagellata	Dinophyceae	Dinophyceae_unclassified	Dinophyceae_unclassified	Dinophyceae_unclassified	Dinophyceae_unclassified
OTU_5265	0	2.64e-05	0	0	0	0	7.3e-05	0	0	0	0	0	0	0	0	0	0	0.000213527	0.000315806	0	0	1.54e-05	0	0	0	0	0	0	0	0	0	0	0	0	Eukaryota	Rhizaria	Cercozoa	Novel-clade-10-12	Novel-clade-10	Novel-clade-10_X	Novel-clade-10_XX	Novel-clade-10_XX_sp.
OTU_23112	0.00012605	5.27e-05	0.00025252	0.000272777	0.00119523	0.000222898	0	0	0	0	0	0	0.000111755	0	0	0	0	0	0	0	0	1.54e-05	0	0	0	0	8.14e-05	0.000457152	0	0	0	0.000250356	0.00102451	2.95e-05	Eukaryota	Alveolata	Dinoflagellata	Dinophyceae	Gymnodiniales	Gymnodiniaceae	Gyrodinium	Gyrodinium_fusiforme
OTU_3364	0	0	0	0	0	3.18e-05	0	0	0	0	0	0	0	0	0	0	0	0	0	0	0	1.54e-05	5.46e-05	0	0	2.92e-05	0	0	3.51e-05	0	0	0.000297298	0	0	Eukaryota	Alveolata	Ciliophora	Spirotrichea	Tintinnida	Dictyocystidae	Dictyocystidae_unclassified	Dictyocystidae_unclassified
OTU_68	0	0	2.1e-05	0.00023758	0.000298807	0.000382111	0	0	9.54e-05	0.00257682	0	0.00105749	0.00156457	0.000943541	0	2.25e-05	0	0	0	0	0	1.54e-05	0.000163773	0	3.07e-05	0.000568737	0.000101754	0	0.000175654	0	0.0723847	0.00607113	0.000504833	0.000103214	Eukaryota	Stramenopiles	Stramenopiles_X	Stramenopiles_X-Group-7	Stramenopiles_X-Group-7_X	Stramenopiles_X-Group-7_XX	Stramenopiles_X-Group-7_XXX	Stramenopiles_X-Group-7_XXX_sp.
OTU_5875	0.0138655	2.64e-05	0.000462953	0.000316773	0.000488958	0.00117818	0	0	0	0	0	0	0.000586715	0	0	0	0	1.78e-05	0	0	0.000203264	4.61e-05	0	9.41e-05	0	0	0.000122105	0	0	0	0.000859362	1.56e-05	0.00135117	0	Eukaryota	Alveolata	Dinoflagellata	Dinophyceae	Gymnodiniales	Gymnodiniaceae	Gyrodinium	Gyrodinium_helveticum
OTU_181	0.000609244	0.000237254	0.00018939	0.000448762	0	0	0	0.000216219	0	0	0	0	0	0	0	0	0	0.000177939	5.92e-05	0	0	0	0	0	0	0	0	0	0	0	0	0	0	0	Eukaryota	Rhizaria	Cercozoa	Filosa-Imbricatea	Filosa-Imbricatea_X	Novel-clade-2	Novel-clade-2_X	Novel-clade-2_X_sp.
OTU_11351	0	0.000474508	0.000168347	7.92e-05	2.72e-05	0	0	0	0.00115869	0.00134136	0.000344674	0	0	0	0	0.000180339	0	0	0	0.000988073	0.000232302	0.00571762	0.00586855	0.0019534	0.000276481	0.00708734	0.000162807	0.0104729	0.000632356	0	0	0.000954482	0.000608769	0.00081097	Eukaryota	Alveolata	Ciliophora	Spirotrichea	Strombidiida	Strombidiidae_R	Strombidiidae_R_X	Strombidiidae_R_X_sp.
OTU_22879	0	0.000395424	0.000168347	0.000105591	0.000353136	6.37e-05	0	0	0	3.53e-05	7.18e-05	1.73e-05	0	0	0	0	0	0	0	0	0	0	0	0	0	0	2.04e-05	0	0	0	0	0	0.000103936	1.47e-05	Eukaryota	Alveolata	Dinoflagellata	Dinophyceae	Gymnodiniales	Gymnodiniaceae	Gyrodinium	Gyrodinium_unclassified
OTU_22855	0.000336134	0	0	2.64e-05	2.72e-05	3.18e-05	0	0	0	0	0	0	6.98e-05	0	0	0	0	0	0	0	0.00024682	0	0	0.000658979	0	0	0.000345964	4.16e-05	0	0	0	4.69e-05	0.00203418	0	Eukaryota	Alveolata	Dinoflagellata	Dinophyceae	Gymnodiniales	Gymnodiniaceae	Gymnodiniaceae_unclassified	Gymnodiniaceae_unclassified
OTU_8093	0	5.27e-05	0	8.8e-06	8.15e-05	0.00788104	0	0	0	0.000529483	0	0	0	0.00115584	0	0	0	0	0	1.76e-05	0	0.00013833	6.82e-05	0.000258884	4.61e-05	0.000102081	0.000345964	0.00191173	0.000210785	0	0	0.00388052	0.00494439	0.000471837	Eukaryota	Hacrobia	Haptophyta	Prymnesiophyceae	Phaeocystales	Phaeocystaceae	Phaeocystis	Phaeocystis_pouchetii
OTU_2301	0.0498109	0	0.000231477	0.000281576	0.000950751	0.00121002	0	0	0	0	0	0	0.00701264	0	0	0	0	0	0	0	8.71e-05	6.15e-05	0	2.35e-05	0	0	0.000142456	0	0	0	0.000429681	6.26e-05	0.00157389	0	Eukaryota	Alveolata	Dinoflagellata	Dinophyceae	Dinophyceae_unclassified	Dinophyceae_unclassified	Dinophyceae_unclassified	Dinophyceae_unclassified
OTU_1222	0	0	8.42e-05	0.00012319	0	0	0	0.000216219	0.00106326	0	0	0	0	0	0	0	0	1.78e-05	0	0.000123509	1.45e-05	6.15e-05	0.000136478	0	0	0	0	0	3.51e-05	0	0	0	0	0	Eukaryota	Stramenopiles	Ochrophyta	Bacillariophyta	Bacillariophyta_X	Araphid-pennate	Tabularia	Tabularia_tabulata
OTU_376	0	0	0	0	0	0	4.87e-05	0	0	0	0	0	0	0	0	0	0	0.00188616	0.00183562	0.000811631	0.000188745	0.000292029	1.36e-05	0	0	0	0	0	0	0	0	0	0	0	Eukaryota	Archaeplastida	Chlorophyta	Chlorophyta_unclassified	Chlorophyta_unclassified	Chlorophyta_unclassified	Chlorophyta_unclassified	Chlorophyta_unclassified
OTU_22215	0.000105042	7.91e-05	6.31e-05	8.8e-06	0	1.59e-05	0	0	0	0	0	0	2.79e-05	0	0	0	0	0	0	0	0	1.54e-05	0	2.35e-05	0	0	8.14e-05	4.16e-05	0	0	6.61e-05	0	0.000371201	0	Eukaryota	Alveolata	Dinoflagellata	Dinophyceae	Dinophyceae_unclassified	Dinophyceae_unclassified	Dinophyceae_unclassified	Dinophyceae_unclassified
OTU_721	0	2.64e-05	0.000105217	3.52e-05	0.000162986	0.000222898	0	3.41e-05	0	0.004783	0.00251325	0.000502739	0.000880073	0.0084329	0	0	0	0	0	0	0	7.68e-05	5.46e-05	0.00014121	0	4.37e-05	0.000162807	0	3.51e-05	0	0	0.0011266	0.000252417	0.000457092	Eukaryota	Hacrobia	Haptophyta	Prymnesiophyceae	Prymnesiophyceae_Clade_F	Prymnesiophyceae_Clade_F_X	Prymnesiophyceae_Clade_F_XX	Prymnesiophyceae_Clade_F_XX_sp.
OTU_158	0	0	0	8.8e-06	0	0.000143292	0	0	0	0	0	0	0	0	0	0	0	0	0	0	0	3.07e-05	1.36e-05	0	3.07e-05	0.000102081	0.000101754	0.00515335	0	0	0	0.00679091	0.00121754	0.00821292	Eukaryota	Rhizaria	Cercozoa	Filosa-Thecofilosea	Cryomonadida	Protaspa-lineage	Protaspa-lineage_X	Protaspa-lineage_X_sp.
OTU_22249	0	2.64e-05	0	1.76e-05	2.72e-05	6.37e-05	0	0	0	0	0	0	0	0	0	0	0	0	0	0	0	0	0	0	0	0	8.14e-05	4.16e-05	0	0	0	0	0.000816642	0	Eukaryota	Alveolata	Dinoflagellata	Dinophyceae	Gymnodiniales	Gymnodiniaceae	Gymnodiniaceae_unclassified	Gymnodiniaceae_unclassified
OTU_1524	0.000441176	0	0	8.8e-06	0	0	0	0	0.00163579	0.00199439	0	0	0.00141091	0.00288959	0	0	0	0	0	0	0	0	2.73e-05	0	0	0.000218745	0	0	0	0	0	0.00134566	0.000237568	0	Eukaryota	Rhizaria	Cercozoa	Filosa-Thecofilosea	Cryomonadida	Cryothecomonas-lineage	Cryothecomonas-lineage_X	Cryothecomonas-lineage_X_sp.
OTU_1161	0.0012395	0.000263616	0.0006313	0.000527955	0	0	0.000182568	0.00696452	0.00601153	0	0	0	0	0	0	0.00232186	0.00237115	0.000142351	0	0	0	0	0	0	0	0	0	0	0	0	0	0	0	0	Eukaryota	Rhizaria	Cercozoa	Novel-clade-10-12	Novel-clade-10	Novel-clade-10_X	Novel-clade-10_XX	Novel-clade-10_XX_sp.
OTU_128	0.000294118	0.000395424	0.000526083	0.000272777	0.000597615	0.000398032	0	0	0	0.000282391	0.000359035	0	4.19e-05	0	0	0	0	0	0	0	0	0	0	0	0	0	0.000122105	0.000124678	0	0	0	0	0.00215296	0	Eukaryota	Alveolata	Dinoflagellata	Dinophyceae	Dinophyceae_unclassified	Dinophyceae_unclassified	Dinophyceae_unclassified	Dinophyceae_unclassified
OTU_2542	0	0.000210893	0.000420867	0.000527955	0.00369435	0.00170358	0	0	0	0	0	1.73e-05	0.00156457	0	0	0	0	0	0	0	0	0	0	0	0	0	0	0	0	0	0	0	0	0	Eukaryota	Alveolata	Dinoflagellata	Dinophyceae	Gymnodiniales	Gymnodiniaceae	Gyrodinium	Gyrodinium_heterogrammum
OTU_1154	0	0	2.1e-05	5.28e-05	2.72e-05	0	0	0	0	0.00416527	0.0122934	0.0152555	0.000419082	0.00948259	0.0046455	0	0	0	0	0	0	0	0.000136478	0	4.61e-05	0.000320826	0.000142456	0	3.51e-05	0	0	0	4.45e-05	2.95e-05	Eukaryota	Stramenopiles	Ochrophyta	Bacillariophyta	Bacillariophyta_X	Polar-centric-Mediophyceae	Chaetoceros	Chaetoceros_peruvianus
OTU_4450	0	0.00253071	0.00202016	0.000765535	0.000461793	0	0	0	0	0	0	0	0	0	1.74e-05	0	0	0	0	0	0	0	0.000341194	0	3.07e-05	2.92e-05	2.04e-05	0	0.000210785	0	0	0	1.48e-05	0	Eukaryota	Alveolata	Ciliophora	Spirotrichea	Strombidiida	Tontoniidae_A	Tontoniidae_A_X	Tontoniidae_A_X_sp.
OTU_3818	0.0030042	0.000764486	0.000610257	0.000668743	0	0	0.00749747	0.000899014	0	0	0	0	0	0	0	0.000247966	0.000504826	0.000177939	0	0	0	0	0	0	0	0	0	0	0	0	0	0	0	0	Eukaryota	Stramenopiles	Ochrophyta	Ochrophyta_unclassified	Ochrophyta_unclassified	Ochrophyta_unclassified	Ochrophyta_unclassified	Ochrophyta_unclassified
OTU_428	0	0	0	0	0	0	0	2.28e-05	0.000163579	0	0	0	0	0	0	0.00879151	0.0095917	0.00211748	0.000217117	5.29e-05	0.000203264	6.15e-05	1.36e-05	0	0	0	0	0	0	0	0	0	0	0	Eukaryota	Stramenopiles	Ochrophyta	Bacillariophyta	Bacillariophyta_X	Raphid-pennate	Surirella	Surirella_unclassified
OTU_4241	8.4e-05	7.91e-05	2.1e-05	4.4e-05	0.00019015	9.55e-05	0	0	0	0	0	0	0	0	0	0	0	0	0	0	1.45e-05	0	0	2.35e-05	0	0	0	0	0	0	0	0	5.94e-05	0	Eukaryota	Alveolata	Dinoflagellata	Dinophyceae	Gymnodiniales	Gymnodiniaceae	Gyrodinium	Gyrodinium_helveticum
OTU_23365	0.00012605	0	0	8.8e-06	0	3.18e-05	0	0	0	0	0	0	1.4e-05	0	0	0	0	0	0	0	0	0	0	2.35e-05	0	0	0.000223859	0	0	0	0	0	0.00117299	0	Eukaryota	Alveolata	Dinoflagellata	Dinophyceae	Dinophyceae_unclassified	Dinophyceae_unclassified	Dinophyceae_unclassified	Dinophyceae_unclassified
OTU_147	0.0022479	0.00242526	0.00094695	0.000563152	0	0	0	1.14e-05	0	0	0	0	0	0	0	0.000788981	0.000734293	8.9e-05	5.92e-05	0	0	0	0	0	0	0	0	0	0	0	0	0	0	0	Eukaryota	Archaeplastida	Chlorophyta	Chlorophyceae	Chlamydomonadales	Chlamydomonadales_X	Chlamydomonadales_X_unclassified	Chlamydomonadales_X_unclassified
OTU_566	0	0	0	0	0	0.000111449	0.000377308	0	0	0	0	0	0	0.000507153	0	0	1.53e-05	0	0	0.000141153	0	0.000568688	0.00111912	4.71e-05	0.000245761	0.00804982	0.000773332	0	0.00122958	0	0	0.000985777	0.00135117	0.00555883	Eukaryota	Stramenopiles	Ochrophyta	Bacillariophyta	Bacillariophyta_X	Raphid-pennate	Pleurosigma	Pleurosigma_intermedium
OTU_2232	0	0.000448147	0.00031565	0.000193584	0.00138538	9.55e-05	0	1.14e-05	0.000381685	0	0	0	0	2.36e-05	0.000330579	0	0	0	9.87e-05	3.53e-05	1.45e-05	0	1.36e-05	2.35e-05	4.61e-05	0.000131247	4.07e-05	0	7.03e-05	0	0	0	0	4.42e-05	Eukaryota	Alveolata	Ciliophora	Litostomatea	Haptoria_4	Didiniidae	Didiniidae_X	Didiniidae_X_sp.
OTU_484	0.00804622	0.000131808	6.31e-05	7.92e-05	8.15e-05	0.00862934	0	0	0.00230374	8.82e-05	0.00353291	0.00343249	0.0133967	0.012384	0.00247064	0.00029305	0	0	0	0	0	0	1.36e-05	0	1.54e-05	0	0.00024421	0.00199485	0	0	0	0.00148649	0.000445441	0.00188735	Eukaryota	Stramenopiles	Stramenopiles_X	MAST	MAST-7	MAST-7A	MAST-7A_X	MAST-7A_X_sp.
OTU_555	0	2.64e-05	0	0	0	0.000286583	0	0	0.002072	0	0	0.00199362	0.0011874	0.00196964	0	0	0	0	0	0	0	1.54e-05	2.73e-05	0.00225935	0.00012288	0.000277077	0.000590175	0.002452	0	0	0	0.00485065	0.00182631	0.00106163	Eukaryota	Hacrobia	Telonemia	Telonemia_X	Telonemia_XX	Telonemia-Group-1	Telonemia-Group-1_X	Telonemia-Group-1_X_sp.
OTU_1422	0	0	0	0	0	0	0	0	0	0	0.00110583	0	0	0	0	0	0	0	0.00118427	0.000652834	0.00238109	0.0037349	0.00012283	0.00496587	4.61e-05	0	0	0	0	0	0	0	0	0	Eukaryota	Rhizaria	Cercozoa	Filosa-Imbricatea	Thaumatomonadida	Thaumatomonadidae	Thaumatomastix	Thaumatomastix_salina
OTU_4190	0	0	6.31e-05	0	2.72e-05	0.00163989	0	0	0.00166305	0.00330045	0.00407864	0	0.000279388	0	0.00960418	0.00178084	1.53e-05	0	0.00161851	0.0610311	0.0167838	0.0114199	0.0330003	0.00658979	0.00476161	0.0229391	0.0116	0.007356	0.00973125	0	0	0.0076828	0.0126505	0.0136096	Eukaryota	Alveolata	Ciliophora	Spirotrichea	Strombidiida_B	Strombidiida_B_X	Strombidiida_B_XX	Strombidiida_B_XX_sp.
OTU_9409	0	0.0003427	0.00018939	7.92e-05	2.72e-05	0.000175134	0	0	0.000613422	0.000529483	1.44e-05	5.2e-05	1.4e-05	0	0.000748151	2.25e-05	0	0	0	1.76e-05	7.26e-05	0.000353509	2.73e-05	0.000611909	6.14e-05	0	0.000162807	0.00153769	0	0.000619913	0	0.000719773	0.000267265	0.000294898	Eukaryota	Hacrobia	Cryptophyta	Cryptophyceae	Cryptophyceae_X	Cryptomonadales	Teleaulax	Teleaulax_gracilis
OTU_6584	4.2e-05	0.000369062	0.000294607	0.000175985	0.000651944	0.000111449	0	0	0	7.06e-05	0.000244144	0	0	0	0	0	0	0	0	0	0	1.54e-05	0	0	0	0	2.04e-05	0	0	0	0	0	0.000267265	2.95e-05	Eukaryota	Alveolata	Dinoflagellata	Dinophyceae	Dinophyceae_unclassified	Dinophyceae_unclassified	Dinophyceae_unclassified	Dinophyceae_unclassified
OTU_1914	0	0.00208256	0.00292502	0.00267497	0.00220031	1.59e-05	0	0	9.54e-05	0.00142961	0.00736741	0	0.00209541	0	0.000835146	0	0	0	0	5.29e-05	0	0	0.000341194	0	7.68e-05	8.75e-05	0.00134316	0	0.000597225	0	0	0	0.000668161	0	Eukaryota	Alveolata	Ciliophora	Spirotrichea	Strombidiida_G	Strombidiida_G_X	Strombidiida_G_XX	Strombidiida_G_XX_sp.
OTU_8017	0	0	0	0	0	0.000191055	1.22e-05	0	0.00190842	0	0	0.00431662	0.000377174	0	0.00031318	0	0	0	0	0	0	0	0.000300251	0	0	0.000335409	0	0	0	0	0	0	2.97e-05	0.000486582	Eukaryota	Alveolata	Ciliophora	CONThreeP	CONThreeP_X	Urotrichidae	Urotricha	Urotricha_sp.
OTU_3858	0	2.64e-05	2.1e-05	8.8e-06	0.000624779	3.18e-05	0	0	0	0	0	0	0	0	0	0	0	0	0	0	0	0	0	0	0	0	0	0	0	0	0	0	2.97e-05	0	Eukaryota	Alveolata	Dinoflagellata	Dinophyceae	Dinophyceae_unclassified	Dinophyceae_unclassified	Dinophyceae_unclassified	Dinophyceae_unclassified
OTU_6997	0	0.000764486	0.000462953	0.000255178	0.000679108	0.000159213	0	0	0	0.00409467	0.00218294	0.000329381	0.0214849	0.00319624	0.00107873	0	0	5.34e-05	0	0.000123509	0.000174226	0.000645538	5.46e-05	0.0048482	0.00012288	0.000131247	0.000183158	0.00324163	0.000140523	0.00126678	0.00330524	0.00790186	0.00127693	0.000309643	Eukaryota	Archaeplastida	Chlorophyta	Mamiellophyceae	Mamiellales	Mamiellaceae	Micromonas	Micromonas_unclassified
OTU_14595	0.000147059	0	6.31e-05	2.64e-05	0	1.59e-05	0	0.000762455	0.000886054	0	0	0	0	0	0.00130492	0.00229932	0.00168275	7.12e-05	0	0	0	0	0	0	0	0	0	0	0	0	0	0	0	0	Eukaryota	Stramenopiles	Ochrophyta	Chrysophyceae	Chrysophyceae_X	Chrysophyceae_Clade-F	Chrysophyceae_Clade-F_unclassified	Chrysophyceae_Clade-F_unclassified
OTU_918	0	0	0	1.76e-05	2.72e-05	0.000191055	0	0	0	0	0	0	0	0	0	0	0	0	0	0	0	0	0	0	0	0	0.000305263	0	0	0	6.61e-05	0	0.000460289	0	Eukaryota	Alveolata	Dinoflagellata	Dinophyceae	Gymnodiniales	Gymnodiniaceae	Gyrodinium	Gyrodinium_helveticum
OTU_965	0	2.64e-05	2.1e-05	0.000140788	0	1.59e-05	0	0	0	1.76e-05	0	0	0	0	0	0.000450846	0	0	0	0	0	1.54e-05	1.36e-05	0	0	0	0	0	7.03e-05	0	0	1.56e-05	0	0	Eukaryota	Alveolata	Dinoflagellata	Dinophyceae	Peridiniales	Thoracosphaeraceae	Thoracosphaeraceae_unclassified	Thoracosphaeraceae_unclassified
OTU_1533	0.00147059	0.000606316	0.000357737	0.000334372	0	0	0	0	0	0	0	0	0	0	0	0.00137508	0.00186633	0.000302496	9.87e-05	0	0	0	0	0	0	0	0	0	0	0	0	0	0	0	Eukaryota	Rhizaria	Cercozoa	Novel-clade-10-12	Novel-clade-10	Novel-clade-10_X	Novel-clade-10_XX	Novel-clade-10_XX_sp.
OTU_1855	0	0	0	0	0	3.18e-05	0	0	0	0	0	0	0	0	0	0	0	0	0	0	0	4.61e-05	6.82e-05	0	0	1.46e-05	0	0	3.51e-05	0	0	0.000187767	0	0	Eukaryota	Alveolata	Ciliophora	Spirotrichea	Tintinnida	Tintinnida_unclassified	Tintinnida_unclassified	Tintinnida_unclassified
OTU_858	4.2e-05	0	4.21e-05	1.76e-05	0	0	7.3e-05	0.00139973	0.00190842	0	0	0	0	0	0	0.0140439	0.0111215	0.018648	0.0092768	0.000564613	5.81e-05	0.00010759	1.36e-05	0	0	0	0	0	0	0	0	0	0	0	Eukaryota	Hacrobia	Cryptophyta	Cryptophyceae	Cryptophyceae_X	Basal_Cryptophyceae-1	Basal_Cryptophyceae-1_X	Basal_Cryptophyceae-1_X_sp.
OTU_118	0	0	0	1.76e-05	0	0	0	0	0	0.0101837	0.00574457	0.00110949	0	0.000259474	0	0.000247966	1.53e-05	0	3.95e-05	0.000194086	0	0.000445729	0.000504968	0.000211815	0.000737282	0.00014583	0.000793683	0	0.00217811	0	0	0	4.45e-05	0	Eukaryota	Stramenopiles	Ochrophyta	Chrysophyceae	Chrysophyceae_X	Chrysophyceae_Clade-F	Chrysophyceae_Clade-F_unclassified	Chrysophyceae_Clade-F_unclassified
OTU_365	0.000231092	0.000289977	0.00056817	0.000615948	0.00364002	0.0044102	0.00555008	0	0	0.00462415	0.00218294	0	0	0.000141531	0.00508047	0	0	0	0	0	0	0	1.36e-05	0	0	7.29e-05	0	0.00527803	0	0	0.0236325	0.00619631	0.000296961	8.85e-05	Eukaryota	Alveolata	Dinoflagellata	Dinophyceae	Prorocentrales	Prorocentraceae	Prorocentrum	Prorocentrum_sp.
OTU_4619	0	0.000421785	0.000610257	0.000158387	0.000271643	0	0	0	0.00100874	0.00144725	0.000459565	0	0	0	1.74e-05	0.000135254	0	0	0	0.00105865	0.000421047	0.00628631	0.00586855	0.00167098	0.000307201	0.00653318	0.000183158	0.0109717	0.00080801	0	0	0.000844951	0.000608769	0.000958419	Eukaryota	Alveolata	Ciliophora	Spirotrichea	Strombidiida	Strombidiidae_R	Strombidiidae_R_unclassified	Strombidiidae_R_unclassified
OTU_942	0	2.64e-05	0.000147303	0.000615948	0.000244479	0.00780143	0	2.28e-05	0	0.00102367	0.000818601	0.00341516	0.00921981	0.00110866	0	0	0	0	0.000197379	0.000105865	0.000217783	0.000307399	5.46e-05	2.35e-05	6.14e-05	0.000160413	0	0.000789627	7.03e-05	0	0	0	0	5.9e-05	Eukaryota	Stramenopiles	Ochrophyta	Bacillariophyta	Bacillariophyta_X	Polar-centric-Mediophyceae	Polar-centric-Mediophyceae_unclassified	Polar-centric-Mediophyceae_unclassified
OTU_114	6.3e-05	2.64e-05	2.1e-05	8.8e-06	8.15e-05	0.000843828	0	0	1.36e-05	0	0	0	0.00277991	0	0	0	0	0.000124557	0	0	0	0	4.09e-05	0	3.07e-05	5.83e-05	2.04e-05	0	0	0	0	4.69e-05	7.42e-05	4.42e-05	Eukaryota	Alveolata	Ciliophora	Spirotrichea	Strombidiida	Strombidiida_unclassified	Strombidiida_unclassified	Strombidiida_unclassified
OTU_776	0	0.000421785	0.000357737	9.68e-05	2.72e-05	0	0	0	0	0	0	0	0	0	0	0	0	0	0	0	0	3.07e-05	0	2.35e-05	0	1.46e-05	0	0	0	0	0	0	0	2.95e-05	Eukaryota	Alveolata	Ciliophora	Spirotrichea	Spirotrichea_unclassified	Spirotrichea_unclassified	Spirotrichea_unclassified	Spirotrichea_unclassified
OTU_5597	0	0.0013708	0.00183077	0.00137268	0.000651944	1.59e-05	0	0	0.000381685	0.00247092	0.00522756	0.000312045	0.00046099	0	0.000191388	0	0	0	0	0	0	0	0.000136478	0	0	0	0.000569824	0	0.000140523	0	0	0	0.000207872	0	Eukaryota	Alveolata	Ciliophora	Spirotrichea	Strombidiida	Tontoniidae_A	Laboea	Laboea_strobila
OTU_2209	0	0.000105446	0.000231477	4.4e-05	0.000135822	0	0	0	0	0	0	0	0	0	0	0	0	0	0	5.29e-05	0	4.61e-05	0.000163773	0	0.000276481	7.29e-05	0	0	7.03e-05	0	0	0	0	0	Eukaryota	Alveolata	Ciliophora	Spirotrichea	Strombidiida	Strombidiidae_R	Strombidium_R	Strombidium_R_unclassified
OTU_572	0	0	0	0	0	0.000557245	0	3.41e-05	0	0	0	0	0	0	0	0	0	0	0	0	0	0	0.000341194	9.41e-05	6.14e-05	0.00519155	0.00256421	0	0	0	0	0	0.0228808	0.0011501	Eukaryota	Rhizaria	Radiolaria	Acantharea	Acantharea_X	Acantharea_XX	Acantharea_XXX	Acantharea_XXX_sp.
OTU_23046	0	0	4.21e-05	3.52e-05	8.15e-05	0.000557245	0	0	0	0	0	0	0	0	0	0	0	0	1.97e-05	0	0	0	0	0	0	0	0	0	0	0	0	0.00117354	0.000549377	0.000206429	Eukaryota	Alveolata	Dinoflagellata	Dinophyceae	Dinophyceae_unclassified	Dinophyceae_unclassified	Dinophyceae_unclassified	Dinophyceae_unclassified
OTU_955	0	0.00714399	0.0123735	0.00870246	0.0027436	0	0	0	0.00188116	0.0111544	0.0261809	0.00162957	0.0016903	7.08e-05	0.000574163	0	0	0	0	0	0	0	0.00103723	2.35e-05	4.61e-05	0.000364575	0.00325614	0	0.000737748	0	0	0	0.000876034	0	Eukaryota	Alveolata	Ciliophora	Spirotrichea	Strombidiida	Tontoniidae_A	Laboea	Laboea_unclassified
OTU_15665	0.00579832	5.27e-05	0.000168347	0.000175985	0.000162986	0.000509481	0	0	0	0	0	0	9.78e-05	0	0	0	0	0	0	0	2.9e-05	1.54e-05	0	0.000235349	0	0	0.000386666	0.000249356	0	0	9.92e-05	0	0.00250932	0	Eukaryota	Alveolata	Dinoflagellata	Dinophyceae	Gymnodiniales	Gymnodiniaceae	Gyrodinium	Gyrodinium_unclassified
OTU_12721	8.4e-05	0	0	0	0	0	8.52e-05	0.00163871	0.000613422	0	0	0	0	0	0	0.00491423	0.00469642	0.0049645	0.00256593	8.82e-05	7.26e-05	4.61e-05	0	0	0	0	0	0	0	0	0	0	0	0	Eukaryota	Hacrobia	Cryptophyta	Cryptophyceae	Cryptophyceae_X	Basal_Cryptophyceae-1	Basal_Cryptophyceae-1_X	Basal_Cryptophyceae-1_X_sp.
OTU_6464	0	0.000738124	0.00193599	0.00140788	0.000706272	0.000175134	0	0	0	0.000229443	0	0	0.000754348	0	0	2.25e-05	0	0	0	0	0	0	0	0	0	0	2.04e-05	0	0	0	0.0034044	9.39e-05	0.000237568	0	Eukaryota	Alveolata	Dinoflagellata	Dinophyceae	Gymnodiniales	Gymnodiniaceae	Gymnodiniaceae_unclassified	Gymnodiniaceae_unclassified
OTU_19822	0.000147059	2.64e-05	2.1e-05	6.16e-05	5.43e-05	0	3.65e-05	0	0	0	0	0	0	0	0	0.000135254	3.06e-05	1.78e-05	0	0	0	0	0	0	0	0	0	0	0	0	0	0	0	0	Eukaryota	Alveolata	Dinoflagellata	Dinophyceae	Peridiniales	Thoracosphaeraceae	Thoracosphaeraceae_unclassified	Thoracosphaeraceae_unclassified
OTU_3277	0.000168067	2.64e-05	8.42e-05	6.16e-05	0.000162986	0.000461717	0	0	0	0	0	0	2.79e-05	0	0	0	0	0	0	0	4.36e-05	1.54e-05	0	0.000211815	0	0	0.000427368	0.000249356	0	0	0	0	0.00258356	0	Eukaryota	Alveolata	Dinoflagellata	Dinophyceae	Dinophyceae_unclassified	Dinophyceae_unclassified	Dinophyceae_unclassified	Dinophyceae_unclassified
OTU_934	0	0.00155533	0.000841733	0.00183904	0.000570451	0	0	0	0.000518001	0.00384758	0.00248453	0.00083212	0.00107564	0.000672273	0.00193127	0	0	0	1.97e-05	0.000158797	0.000421047	0.0105745	0.00421716	0.00120028	0.00270337	0.00278535	0.00164842	0.0035741	0.00590199	0.0111315	0	0.00117354	0.00705281	0.00600118	Eukaryota	Stramenopiles	Ochrophyta	Bacillariophyta	Bacillariophyta_X	Polar-centric-Mediophyceae	Chaetoceros	Chaetoceros_unclassified
OTU_162	0.000105042	5.27e-05	0	3.52e-05	0	6.37e-05	0	5.69e-05	0	7.06e-05	4.31e-05	0	0	1.18e-05	0	0.000473389	0	0.000266909	0.000177641	0	0	0	0	0	0	2.92e-05	0	0	0	0	0	0	1.48e-05	0	Eukaryota	Rhizaria	Cercozoa	Filosa-Thecofilosea	Cryomonadida	Protaspa-lineage	Protaspa-lineage_X	Protaspa-lineage_X_sp.
OTU_21806	0.000168067	0.000369062	0.000589213	0.000607149	0.0011409	0.000334347	0	0	0	0	0	0	0	0	0	0	0	0	0	0	0	0	0	0	0	0	0	0	0	0	0.00158651	0	2.97e-05	0	Eukaryota	Alveolata	Dinoflagellata	Dinophyceae	Dinophyceae_unclassified	Dinophyceae_unclassified	Dinophyceae_unclassified	Dinophyceae_unclassified
OTU_3592	0.00107143	0.000131808	8.42e-05	5.28e-05	0.000434629	0.00472862	0	0	0.000654316	0	0.00147923	0	0.00233289	0.000247679	0.000226185	0	0	0	0	3.53e-05	0	0.00010759	0.000764276	0	0.000245761	0.00134164	0.00205544	0	0.00042157	0	0.000297471	0.000610243	0.00252417	0.000162194	Eukaryota	Alveolata	Ciliophora	Spirotrichea	Strombidiida	Strombidiidae_M	Strombidiidae_M_unclassified	Strombidiidae_M_unclassified
OTU_766	4.2e-05	0.000237254	0.00037878	0.000378368	0.000543286	0.00353453	0	0	0	0.000123546	0.000574457	0	0.00808829	0	0	2.25e-05	0	0	0	0	1.45e-05	0	0	0.000635444	0	2.92e-05	8.14e-05	0.0033663	0	0	0	0.00212803	0.000415745	0.00120908	Eukaryota	Alveolata	Dinoflagellata	Dinophyceae	Dinophyceae_unclassified	Dinophyceae_unclassified	Dinophyceae_unclassified	Dinophyceae_unclassified
OTU_648	2.1e-05	0.000105446	0.000147303	3.52e-05	5.43e-05	6.37e-05	0	0	0	0	0	0	0	0	0	0	0	0	0	0	0	0	0	0	6.14e-05	1.46e-05	2.04e-05	0	0	0	0	0	0	0	Eukaryota	Alveolata	Dinoflagellata	Dinophyceae	Peridiniales	Protoperidiniaceae	Protoperidinium	Protoperidinium_bipes
OTU_3123	0	0.000685401	0.00191494	0.00195343	0.00225464	0	0	0	0	0.000141196	0.00160848	0	0	2.36e-05	0.000243584	0	0	1.78e-05	0	3.53e-05	2.9e-05	6.15e-05	0.00133748	0.000305954	0.000215041	0.000320826	0.00669543	0.000166237	0.00235377	0	0.000165262	0	0.00129178	5.9e-05	Eukaryota	Alveolata	Ciliophora	Spirotrichea	Spirotrichea_unclassified	Spirotrichea_unclassified	Spirotrichea_unclassified	Spirotrichea_unclassified
OTU_4052	0	0	0	0	0	0.00098712	0	0	0	0	0	0	0	1.18e-05	0	0	0	0	0	0	0	0	0	0	0	0	0	0	0	0	0	0	1.48e-05	0	Eukaryota	Stramenopiles	Ochrophyta	Chrysophyceae	Chrysophyceae_X	Chrysophyceae_X_unclassified	Chrysophyceae_X_unclassified	Chrysophyceae_X_unclassified
OTU_938	0	0.000263616	0.00025252	0.000307974	0.000651944	0.000636851	0	0	0	0	4.31e-05	0	0	0	3.48e-05	0	0	0	0	0	0	0	0	0	0	0	0	0	0	0	0	6.26e-05	1.48e-05	0.000147449	Eukaryota	Alveolata	Dinoflagellata	Dinophyceae	Dinophyceae_unclassified	Dinophyceae_unclassified	Dinophyceae_unclassified	Dinophyceae_unclassified
OTU_110	0	0	0	0	0	0	0	0.000125179	0	0	0	0	0	0	0	0	0	0.0020463	0.000789515	7.06e-05	0	7.68e-05	1.36e-05	0	0	0	0	0	0	0	0	0	0	0	Eukaryota	Rhizaria	Cercozoa	Filosa-Imbricatea	Filosa-Imbricatea_X	Novel-clade-2	Novel-clade-2_X	Novel-clade-2_X_sp.
OTU_10995	0	0.000474508	2.1e-05	1.76e-05	8.15e-05	6.37e-05	0	1.14e-05	0	0.000758926	0.000689348	8.67e-05	0.00317105	0.000860981	0.000330579	0	0	0	0	0	5.81e-05	0.000660908	6.82e-05	0.00155331	6.14e-05	1.46e-05	8.14e-05	0.000249356	0.000140523	0.000161716	0.00082631	0.00211238	0.000371201	7.37e-05	Eukaryota	Archaeplastida	Chlorophyta	Mamiellophyceae	Mamiellales	Mamiellaceae	Micromonas	Micromonas_unclassified
OTU_450	0	0	0	0	2.72e-05	0.000111449	0	0	0	0	0	0	0	0	0	0	0	0	0	0	0	0	0	0	0	7.29e-05	0	0	0	0	0	0	0.000341505	0	Eukaryota	Alveolata	Dinoflagellata	Dinophyceae	Dinophyceae_unclassified	Dinophyceae_unclassified	Dinophyceae_unclassified	Dinophyceae_unclassified
OTU_245	0.00537815	0.00147625	0.00143095	0.00168066	0	0	0.00440598	0.00990054	0.00173121	0	0	0	0	0	0	0.00180339	0.00183573	0.000142351	0.000118427	1.76e-05	0.00013067	0	0	0	0	0	0	0	0	0	0	0	0	0	Eukaryota	Stramenopiles	Ochrophyta	Chrysophyceae	Chrysophyceae_X	Chrysophyceae_Clade-C	Chrysophyceae_Clade-C_unclassified	Chrysophyceae_Clade-C_unclassified
OTU_844	0	7.91e-05	4.21e-05	4.4e-05	0	0	0	0	0	0	0	0	0	0	0	0	0	0	0	0	0	3.07e-05	0	0.000353024	0.0001536	0	2.04e-05	0	0	0	0	4.69e-05	1.48e-05	0	Eukaryota	Alveolata	Dinoflagellata	Dinophyceae	Gymnodiniales	Gymnodiniaceae	Gyrodinium	Gyrodinium_unclassified
OTU_2042	0.0119748	2.64e-05	4.21e-05	0	5.43e-05	0.000111449	0	0	0	0	0	0	0.00141091	0	0	0	0	0	0	0	0	0	0	0	0	0	0.000366315	0	0	0	0	0	0.00252417	0	Eukaryota	Alveolata	Dinoflagellata	Dinophyceae	Dinophyceae_unclassified	Dinophyceae_unclassified	Dinophyceae_unclassified	Dinophyceae_unclassified
OTU_735	0	0	2.1e-05	1.76e-05	0	0	0.000961527	0	0	0	0	0	0	0	0	0	0	0.00108543	1.97e-05	1.76e-05	0	0	0	0	0	0	0	0	0	0	0	0.00125178	0	0	Eukaryota	Alveolata	Ciliophora	Heterotrichea	Heterotrichea_X	Stentoridae	Stentor	Stentor_muelleri
OTU_6988	0	0.000184531	8.42e-05	7.04e-05	2.72e-05	0.000111449	0	0	0.000136316	0	0	0	0.00216526	0	1.74e-05	0	0	0	1.97e-05	1.76e-05	1.45e-05	0.000215179	1.36e-05	7.06e-05	9.22e-05	0	4.07e-05	0	3.51e-05	2.7e-05	0	0.000109531	8.91e-05	0.000176939	Eukaryota	Hacrobia	Cryptophyta	Cryptophyceae	Cryptophyceae_X	Cryptomonadales	Teleaulax	Teleaulax_gracilis
OTU_3756	0	5.27e-05	0.000399823	0.000413565	5.43e-05	0.00012737	0	0	0	0	0	0	0	0	0	0	0	0	0	0	0	6.15e-05	2.73e-05	0	0.00016896	4.37e-05	0.000183158	0	7.03e-05	0	0	0	0.000118784	0	Eukaryota	Alveolata	Dinoflagellata	Dinophyceae	Peridiniales	Protoperidiniaceae	Protoperidinium	Protoperidinium_bipes
OTU_1928	0	0.000184531	0.000105217	0.00012319	8.15e-05	0.000700537	0	0	0.00188116	0	0	0	0	0.00154505	0.0030448	0	0	0	3.95e-05	7.06e-05	0.000232302	0.000245919	2.73e-05	0	3.07e-05	4.37e-05	0	0.00585986	0	0	0	0	1.48e-05	0	Eukaryota	Stramenopiles	Ochrophyta	Bacillariophyta	Bacillariophyta_X	Polar-centric-Mediophyceae	Chaetoceros	Chaetoceros_neogracile
OTU_463	0	0	0	8.8e-06	0	0	0	7.97e-05	0	0.00621261	0.000976577	0.00384855	0	0.00915235	0.000939539	0.00128491	0	0	0	0.000458748	0.000101632	0.00604039	0.0143302	0.0411391	0.0348212	0.00812273	0.102121	0.00170393	0.0341472	0	0.00654437	0.00178379	0.0291912	0.00134179	Eukaryota	Opisthokonta	Choanoflagellida	Choanoflagellatea	Acanthoecida	Stephanoecidae_Group_H	Stephanoecidae_Group_H_X	Stephanoecidae_Group_H_X_sp.
OTU_804	0	2.64e-05	2.1e-05	0	5.43e-05	0	0	0	0	0	0	0	0	0	0.00144411	0	0	0	0	0	0	3.07e-05	0	0	0	0	0	0	0	0	0	0	0	0	Eukaryota	Alveolata	Ciliophora	Spirotrichea	Tintinnida	TIN_11	TIN_11_unclassified	TIN_11_unclassified
OTU_2375	0	0	0	0	0	0.00012737	0	0	0.00085879	0	0	0	0	0.00406902	0.0557982	0	0	1.78e-05	0	0	0	1.54e-05	1.36e-05	0	0	0.000481239	0.000101754	0	0	0	0	0	0.000519681	0.000486582	Eukaryota	Rhizaria	Cercozoa	Filosa-Thecofilosea	Ebriida	TAGIRI1-lineage	TAGIRI1-lineage_X	TAGIRI1-lineage_X_sp.
OTU_53	0	0	0	0	0	0	0	5.69e-05	0	0	0	0	0	0	0	0.00200627	0.00211109	0.0011744	0.000434233	1.76e-05	0.000304896	0	0	0	0	0	0	0	0	0	0	0	0	0	Eukaryota	Stramenopiles	Ochrophyta	Chrysophyceae	Chrysophyceae_X	Chrysophyceae_X_unclassified	Chrysophyceae_X_unclassified	Chrysophyceae_X_unclassified
OTU_659	0.000147059	0	0	2.64e-05	0	0	0.000279938	9.1e-05	0	0	0	0	0	0	0	0	0.000122382	7.12e-05	5.92e-05	0	0	0	0	0	0	0	0	0	0	0	0	0	0	0	Eukaryota	Archaeplastida	Chlorophyta	Chlorophyceae	Chlamydomonadales	Chlamydomonadales_X	Chlamydomonadales_X_unclassified	Chlamydomonadales_X_unclassified
OTU_994	0.00189076	0.000131808	0.00018939	0.000246379	0	0	0.000255596	0	0	0	0	0	0	0	0	0.00108203	0.000948462	0.000106763	0	0	0	0	0	0	0	1.46e-05	0	0	0	0	0	0	0	0	Eukaryota	Stramenopiles	Ochrophyta	Chrysophyceae	Chrysophyceae_X	Chrysophyceae_Clade-H	Chrysophyceae_Clade-H_X	Chrysophyceae_Clade-H_X_sp.
OTU_583	0	0.000237254	0.00050504	0.000272777	0.00182001	0.000684615	0	0	0	0	0	0	0	0	0	0	0	0	0	0	0	0	1.36e-05	4.71e-05	0	0	0	0	0	0	0	0	7.42e-05	5.9e-05	Eukaryota	Alveolata	Dinoflagellata	Dinophyceae	Dinophyceae_unclassified	Dinophyceae_unclassified	Dinophyceae_unclassified	Dinophyceae_unclassified
OTU_2304	0.000147059	5.27e-05	2.1e-05	8.8e-05	0	0	1.22e-05	0.000614516	0	0	0	0	0	0	0	0.000157796	0	7.12e-05	1.97e-05	0	0	0	0	0	0	0	0	0	0	0	0	0	0	0	Eukaryota	Stramenopiles	Ochrophyta	Bolidophyceae	Parmales	Parmales_X	Parmales_XX	Parmales_XX_sp.
OTU_9331	0	0.0003427	2.1e-05	6.16e-05	2.72e-05	9.55e-05	0	0	0.00034079	0.000176494	2.87e-05	6.93e-05	2.79e-05	0	0.00031318	0	0	0	1.97e-05	0	7.26e-05	0.000292029	4.09e-05	0.000258884	0.00013824	1.46e-05	0.000122105	0.000374034	0	0.000134764	0	0.000375534	7.42e-05	0.000132704	Eukaryota	Hacrobia	Cryptophyta	Cryptophyceae	Cryptophyceae_X	Cryptomonadales	Teleaulax	Teleaulax_gracilis
OTU_1526	0	0.000817209	0.000273563	0.00058955	0.000461793	0	0	0	0.00508458	0	0.00060318	0	0.000977858	0.012325	0.00798608	0	0	0	0	0	0	0	0.000150126	0	9.22e-05	1.46e-05	4.07e-05	0	0.000175654	0	0	0	5.94e-05	4.42e-05	Eukaryota	Stramenopiles	Ochrophyta	Bacillariophyta	Bacillariophyta_X	Polar-centric-Mediophyceae	Chaetoceros	Chaetoceros_sp.
OTU_280	0.000147059	7.91e-05	6.31e-05	8.8e-05	0	0.000159213	7.3e-05	0.000193459	0.00192205	0.00282391	0.00466746	0	0.000153663	0.000424593	0	0.00153288	0.000107084	0.00188616	0.00157903	0.000194086	0	3.07e-05	0	0	0	0	0	0	0	0	0	0	0	0	Eukaryota	Rhizaria	Cercozoa	Filosa-Thecofilosea	Cryomonadida	Protaspa-lineage	Protaspa-lineage_X	Protaspa-lineage_X_sp.
OTU_21258	2.1e-05	0	2.1e-05	1.76e-05	2.72e-05	0.000398032	0	0	0	0	0	0	1.4e-05	0	0	0	0	0	0	0	0	0	0	0	0	0	2.04e-05	0	0	0	0	0	0.000103936	0	Eukaryota	Alveolata	Dinoflagellata	Dinophyceae	Gymnodiniales	Gymnodiniaceae	Gymnodiniaceae_unclassified	Gymnodiniaceae_unclassified
OTU_8264	0	0	0	0	2.72e-05	0.000636851	0	0	0	0	0	0	0	0	0	0.000473389	0	0	0	0	0	0	0	0	0	0	0	0	0	0	0	0.000328592	0	0.000427602	Eukaryota	Hacrobia	Cryptophyta	Cryptophyceae	Cryptophyceae_X	Cryptomonadales	Falcomonas	Falcomonas_daucoides
OTU_742	0.00130252	0.000289977	0.00018939	0.000299175	0	0	0	0	0	0	0	0	0	0	0	0	7.65e-05	0	0	0	0	0	0	0	0	0	0	0	0	0	0	0	0	0	Eukaryota	Rhizaria	Cercozoa	Filosa-Imbricatea	Filosa-Imbricatea_X	Novel-clade-2	Novel-clade-2_X	Novel-clade-2_X_sp.
OTU_4981	0	0	0	8.8e-06	2.72e-05	7.96e-05	0	0	0	0	0	0	0	0	0	0	0	0	0	0	0	0	0	4.71e-05	0	0	0.000366315	4.16e-05	0	0	0	0	0.00135117	0	Eukaryota	Alveolata	Dinoflagellata	Dinophyceae	Gymnodiniales	Gymnodiniaceae	Gyrodinium	Gyrodinium_unclassified
OTU_1478	0	0.00118627	0.000483997	0.000791933	0.0019015	0	0	0	0.000613422	0.00614201	2.87e-05	0	0.000810226	0.0154505	0.00247064	0	0	0	0	0	0	1.54e-05	0.000272956	0	0	5.83e-05	0	0	0.000140523	0	0	0	0.000608769	0	Eukaryota	Stramenopiles	Ochrophyta	Bacillariophyta	Bacillariophyta_X	Polar-centric-Mediophyceae	Chaetoceros	Chaetoceros_decipiens
OTU_3286	0	0.000289977	0.000357737	0.000307974	0.000706272	0.00121002	0	0	0	0.000105897	0	3.47e-05	0.000977858	1.18e-05	0	0	0	3.56e-05	0	0	0	0	0	7.06e-05	0	0	0	0	0	0	0	0	0.000267265	0.000250664	Eukaryota	Alveolata	Dinoflagellata	Dinophyceae	Dinophyceae_unclassified	Dinophyceae_unclassified	Dinophyceae_unclassified	Dinophyceae_unclassified
OTU_512	0	0	0	0	0	6.37e-05	0	0	0	0.00315925	0	0.00336315	0	0.00088457	0	0	0	0	0	1.76e-05	0	0.00016907	0.000109182	0.000235349	0.0001536	0.000131247	0.00095649	0	0.00133497	0	0	0	1.48e-05	2.95e-05	Eukaryota	Opisthokonta	Choanoflagellida	Choanoflagellatea	Choanoflagellatea_X	Choanoflagellatea_X_Group_L	Choanoflagellatea_X_Group_L_X	Choanoflagellatea_X_Group_L_X_sp.
OTU_576	0	0	0	0	0	0	0	0	0	0	0.00155103	0	0	0.00339675	0	0	0	0	0	0	0	3.07e-05	0	0	0	1.46e-05	0	0	0	0	0	0	0	0.000516072	Eukaryota	Rhizaria	Cercozoa	Cercozoa_X	Cercozoa_XX	Cercozoa_XXX	Cercozoa_XXXX	Cercozoa_XXXX_sp.
OTU_6097	0.000294118	0	0	8.8e-06	0	0.000191055	0	0	0	0	0	0	0	0	0	0	0	0	0	0	0	0	0	0	0	0	0.000264561	0	0	0	0	1.56e-05	0.00348929	0	Eukaryota	Alveolata	Dinoflagellata	Dinophyceae	Dinophyceae_unclassified	Dinophyceae_unclassified	Dinophyceae_unclassified	Dinophyceae_unclassified
OTU_21731	0	0	2.1e-05	5.28e-05	0	0.000318426	0	0	0.00145858	0.00255917	0.00255633	0.00792247	0.00576937	0.0188354	0.0107003	0	0	0	0	0	0.000101632	3.07e-05	8.19e-05	0.000117675	0.00013824	0.00186662	0.000854736	0.00303383	7.03e-05	0	0.000429681	0.00223756	0.000371201	0.00110587	Eukaryota	Opisthokonta	Choanoflagellida	Choanoflagellatea	Acanthoecida	Stephanoecidae_Group_H	Stephanoecidae_Group_H_unclassified	Stephanoecidae_Group_H_unclassified
OTU_604	0.00340336	0	0	0	0	0	0	0	0	0	0	0	0	0	0	0	0	0	0	0	0	0	0	0	0	0	0	0	0	0	0	0	0	0	Eukaryota	Rhizaria	Cercozoa	Filosa-Thecofilosea	Cryomonadida	Cryothecomonas-lineage	Cryothecomonas-lineage_X	Cryothecomonas-lineage_X_sp.
OTU_39	0.0534034	0.000131808	0.00037878	0.00012319	0.000760601	0.000939356	0	0	0	0	0	0	0.00801844	0	0	0	0	0	0	0	5.81e-05	1.54e-05	0	0	0	0	0.000610525	8.31e-05	0	0	0.00204925	0	0.00601345	4.42e-05	Eukaryota	Alveolata	Dinoflagellata	Dinophyceae	Dinophyceae_unclassified	Dinophyceae_unclassified	Dinophyceae_unclassified	Dinophyceae_unclassified
OTU_1187	0	2.64e-05	0	0	0	0.000318426	0	0	0	0	0	0	0	0	0	0	0	0	0	0	0	0	0	0	0	0	0	0.00652481	0	0	0	0	0	8.85e-05	Eukaryota	Hacrobia	Picozoa	Picozoa_X	Picozoa_XX	Picozoa_XXX	Picozoa_XXX_unclassified	Picozoa_XXX_unclassified
OTU_5841	0.000147059	0.000949017	0.00193599	0.00161906	0.000733437	0.000206977	0	0	0	0	0	0	0	0	0	0	0	0	0	0	0	0	0	0	0	0	0	0	0	0	0	1.56e-05	1.48e-05	0	Eukaryota	Alveolata	Dinoflagellata	Dinophyceae	Dinophyceae_unclassified	Dinophyceae_unclassified	Dinophyceae_unclassified	Dinophyceae_unclassified
OTU_38	0.00039916	0.000131808	8.42e-05	0.00011439	0	0	6.09e-05	0.000739695	0	0	0	0	0	0	0	0.00577084	0.000168275	1.78e-05	0	0	0	0	0	0	0	0	0	0	0	0	0	0	0	0.00241817	Eukaryota	Stramenopiles	Ochrophyta	Chrysophyceae	Chrysophyceae_X	Chrysophyceae_Clade-F	Chrysophyceae_Clade-F_X	Chrysophyceae_Clade-F_X_sp.
OTU_536	6.3e-05	0.000210893	0.000273563	0.000131989	0.000733437	0	0	0	0	0	0	0	0	0	0	0	0	0	0	0	0	0	0	0	0	0	0	0	0	0	0	0	0	0	Eukaryota	Alveolata	Dinoflagellata	Dinophyceae	Dinophyceae_unclassified	Dinophyceae_unclassified	Dinophyceae_unclassified	Dinophyceae_unclassified
OTU_1063	0	0.000632678	0.00128364	0.000783134	0.000733437	0	0	0	0	1.76e-05	0	0	0	0	0	0	0	0	0	0	0	0	1.36e-05	0	0	1.46e-05	4.07e-05	0	3.51e-05	0	0	0	2.97e-05	0	Eukaryota	Alveolata	Ciliophora	Spirotrichea	Strombidiida	Tontoniidae_A	Tontoniidae_A_unclassified	Tontoniidae_A_unclassified
OTU_274	0	0	0	0	0	0	0	2.28e-05	0.000504369	0.00326515	0.000904769	0	0	0	0	0	0	0	0	0	0	7.68e-05	0.00024566	0	3.07e-05	0	0	0	0.000105393	0	0	0	0	0	Eukaryota	Rhizaria	Cercozoa	Filosa-Imbricatea	Filosa-Imbricatea_X	Novel-clade-2	Novel-clade-2_X	Novel-clade-2_X_sp.
OTU_1	0.00834034	0.00229346	0.00103112	0.00106471	0	0	0.000304281	0	0	0	0	0	0	0	0	0	0.000244764	0	1.97e-05	1.76e-05	0	0	0	0	0	0	0	0	0	0	0	0.00187767	0	0	Eukaryota	Stramenopiles	Ochrophyta	Chrysophyceae	Chrysophyceae_X	Chrysophyceae_Clade-C	Dinobryon	Dinobryon_unclassified
OTU_1311	0	0	4.21e-05	5.28e-05	0.000217315	0.00187871	0	0.000113799	0	0.000564782	0.00153667	0.00355384	0.00209541	0.00310189	0	0	0	0	0	1.76e-05	0	4.61e-05	2.73e-05	0	3.07e-05	7.29e-05	0	0.000166237	0	0	0	0	0	0.000339133	Eukaryota	Stramenopiles	Ochrophyta	Bacillariophyta	Bacillariophyta_X	Polar-centric-Mediophyceae	Minidiscus	Minidiscus_trioculatus
OTU_72	0.000105042	0	2.1e-05	4.4e-05	0	0	7.3e-05	1.14e-05	0	0	0	0	0	0	0	0.000315593	0.000107084	0.00274026	0.00369098	0.000882208	0.000101632	0.000507209	8.19e-05	0	4.61e-05	0	0	0	0	0	0	0	0	0	Eukaryota	Stramenopiles	Ochrophyta	Chrysophyceae	Chrysophyceae_X	Chrysophyceae_Clade-E	Chrysophyceae_Clade-E_X	Chrysophyceae_Clade-E_X_sp.
OTU_340	0	0.000105446	0	0	0.000135822	0.00187871	0	0	0	0	0	0	0.0136202	0	0	0	0	0	0	0	0	0	0	0	0	0	0	0.000789627	0	0	0	0	0.000193024	0	Eukaryota	Stramenopiles	Stramenopiles_X	MAST	MAST-1	MAST-1A	MAST-1A_X	MAST-1A_X_sp.
OTU_237	0	0	0	0	2.72e-05	0	0	0	0	0	0	0	0	0.00182811	0	0	0	0	0	0	0	4.61e-05	9.55e-05	0.000588374	0.0001536	0.000189579	0.000305263	0.00548583	0.000210785	0.00161716	0.000396629	0.000469417	0.00123239	0.000412858	Eukaryota	Stramenopiles	Stramenopiles_X	MAST	MAST-2	MAST-2D	MAST-2D_X	MAST-2D_X_sp.
OTU_157	0	0	0	0	0	1.59e-05	1.22e-05	1.14e-05	0	0.00243562	0.0014505	0.000190694	0	0.00189888	0	0.000247966	0	0	0.000907943	0.00319359	0.000551716	0.00534874	0.00257943	0.000847258	0.00430081	0.00121039	0.00295087	0	0.00597225	0	0	0	0.00201933	2.95e-05	Eukaryota	Stramenopiles	Ochrophyta	Chrysophyceae	Chrysophyceae_X	Chrysophyceae_Clade-C	Chrysophyceae_Clade-C_X	Chrysophyceae_Clade-C_X_sp.
OTU_21533	0	7.91e-05	8.42e-05	2.64e-05	0.000244479	6.37e-05	0	0	0	0	0	0	0	0	0	0	0	0	0	0	0	0	0	0	0	0	0	0	0	0	0	1.56e-05	0	0	Eukaryota	Alveolata	Dinoflagellata	Dinophyceae	Dinophyceae_unclassified	Dinophyceae_unclassified	Dinophyceae_unclassified	Dinophyceae_unclassified
OTU_1223	0	0	0	0	0	4.78e-05	0	0	0.000299895	0	0	0	0	0	0.00224445	0	0	0	1.97e-05	0	0	0	0.000655093	0	0	0	0	0	0	0	0	0	4.45e-05	2.95e-05	Eukaryota	Alveolata	Ciliophora	CONThreeP	CONThreeP_X	Urotrichidae	Urotricha	Urotricha_sp.
OTU_1809	0	0	0	8.8e-06	0	0.00154437	0	1.14e-05	0.000518001	0	0	0	0	0	0.000991736	0	0	0	0	0	0	0.000307399	0.000382138	0	0	1.46e-05	0.00024421	0	0.000175654	0	0	0.000312945	0.000683009	0.000737246	Eukaryota	Alveolata	Ciliophora	Spirotrichea	Choreotrichida	Leegaardiellidae_B	Leegaardiella	Leegaardiella_sp.
OTU_2647	0	7.91e-05	2.1e-05	7.04e-05	0.000434629	1.59e-05	0	0	0	0	1.44e-05	0	0	0	0	0	0	0	0	0	0	0	0	0	0	0	0	0	0	0	0	0	4.45e-05	0	Eukaryota	Alveolata	Dinoflagellata	Dinophyceae	Dinophyceae_unclassified	Dinophyceae_unclassified	Dinophyceae_unclassified	Dinophyceae_unclassified
OTU_93	0.00491597	0.00134444	0.000589213	0.00058955	0	0	0.00967612	0.00215081	0	0	0	0	0	0	0	0.000247966	0.000336551	3.56e-05	0	0	0	0	0	0	0	0	0	0	0	0	0	0	0	0	Eukaryota	Stramenopiles	Ochrophyta	Chrysophyceae	Chrysophyceae_X	Chrysophyceae_X_unclassified	Chrysophyceae_X_unclassified	Chrysophyceae_X_unclassified
OTU_23376	8.4e-05	0	0	8.8e-06	0	9.55e-05	0	0	0	0	0	0	6.98e-05	0	0	0	0	0	0	0	0	0	0	0	0	0	0.000427368	0	0	0	6.61e-05	1.56e-05	0.00197479	0	Eukaryota	Alveolata	Dinoflagellata	Dinophyceae	Dinophyceae_unclassified	Dinophyceae_unclassified	Dinophyceae_unclassified	Dinophyceae_unclassified
OTU_896	0	0	0	2.64e-05	0	0	0	0	0	0.0316631	0.0288808	0.00197628	0.00156457	0.00207579	0	0	0	0	0	0	0	0.000876087	0.000300251	0.0174865	0.0014592	0.000218745	0.00742806	0.0026598	0.000386439	0	0	0	0.000994818	0.000884695	Eukaryota	Opisthokonta	Choanoflagellida	Choanoflagellatea	Acanthoecida	Stephanoecidae_Group_D	Stephanoecidae_Group_D_unclassified	Stephanoecidae_Group_D_unclassified
OTU_561	0	0.0003427	2.1e-05	9.68e-05	8.15e-05	1.59e-05	0	0	0	0	0	0	0	0	0	0	0.000168275	0.000249115	0.000256592	0	8.71e-05	0	0	0	0	0	0	0	0	0	0	0	0	0	Eukaryota	Hacrobia	Cryptophyta	Cryptophyceae	Cryptophyceae_X	Cryptomonadales	Cryptomonadales_unclassified	Cryptomonadales_unclassified
OTU_1126	0	0.000237254	0.000105217	7.04e-05	8.15e-05	0.058049	0	0	0	0	0	0	0	0.000200502	0.00626359	0	0	0	1.97e-05	3.53e-05	5.81e-05	0.000445729	1.36e-05	0.000423629	3.07e-05	0.000102081	0	0.00178705	7.03e-05	0	0	0.00280086	0	0.00639929	Eukaryota	Stramenopiles	Ochrophyta	Bacillariophyta	Bacillariophyta_X	Polar-centric-Mediophyceae	Thalassiosira	Thalassiosira_unclassified
OTU_2935	0.000168067	0.00324247	0.00429284	0.00322053	0.00201016	0.000461717	0	0	0	0	2.87e-05	0	2.79e-05	0	0	0	0	0	0	0	0	1.54e-05	0	0	0	0	0	0	0	0	0.000264419	0	4.45e-05	1.47e-05	Eukaryota	Alveolata	Dinoflagellata	Dinophyceae	Peridiniales	Peridiniales_unclassified	Peridiniales_unclassified	Peridiniales_unclassified
OTU_22256	0	2.64e-05	0.000105217	9.68e-05	0.000108657	0.000509481	0	0	0	0	0	0	0	0	0	0	0	0	0	0	0	0	0	0	0	0	0	0	0	0	0	0	4.45e-05	0	Eukaryota	Alveolata	Dinoflagellata	Dinophyceae	Dinophyceae_unclassified	Dinophyceae_unclassified	Dinophyceae_unclassified	Dinophyceae_unclassified
OTU_12498	0	0.000263616	8.42e-05	7.04e-05	8.15e-05	7.96e-05	0	0	9.54e-05	0	0	0	0	0	6.96e-05	0	0	0	0	0	2.9e-05	7.68e-05	0	2.35e-05	6.14e-05	0	0.000162807	4.16e-05	7.03e-05	0	0	0	1.48e-05	5.9e-05	Eukaryota	Hacrobia	Cryptophyta	Cryptophyceae	Cryptophyceae_X	Cryptomonadales	Teleaulax	Teleaulax_gracilis
OTU_1520	0	0.000184531	0.000105217	4.4e-05	2.72e-05	6.37e-05	0	2.28e-05	0	0.000547133	0.000315951	8.67e-05	0.0032409	0.000518947	0.000139191	0	0	1.78e-05	1.97e-05	1.76e-05	1.45e-05	0.000199809	0	0.000729583	0	2.92e-05	2.04e-05	0.000706508	3.51e-05	5.39e-05	0.000231367	0.00111096	0.000178176	0.000117959	Eukaryota	Archaeplastida	Chlorophyta	Mamiellophyceae	Mamiellales	Mamiellaceae	Micromonas	Micromonas_unclassified
OTU_3034	0.00012605	0	2.1e-05	8.8e-06	0	0	0	5.69e-05	0	0	0	8.67e-05	0	0	0	2.25e-05	7.65e-05	0	0	0	0	0	0	0	0	0	0	0	0	0	0	0	0	0	Eukaryota	Alveolata	Dinoflagellata	Dinophyceae	Suessiales	Suessiaceae	Asulcocephalium	Asulcocephalium_miricentonis
OTU_1338	0	0.000210893	6.31e-05	0.000369569	0.000434629	0.000684615	0	0	0	0	0.000387758	0	0	0.000707656	0	0	0	0	0	0	0	0	1.36e-05	0	0	0	0	0	0	0	0	0	0.00022272	0.000132704	Eukaryota	Stramenopiles	Ochrophyta	Bolidophyceae	Parmales	Parmales_env_3	Parmales_env_3B	Parmales_env_3B_sp.
OTU_4467	0	2.64e-05	6.31e-05	7.04e-05	2.72e-05	0.000238819	0	0	0	0	0	0	0	0	0	0	0	0	0	0	0	0	0	0	0	0	0	0	0	0	0	1.56e-05	0	2.95e-05	Eukaryota	Alveolata	Dinoflagellata	Dinophyceae	Dinophyceae_unclassified	Dinophyceae_unclassified	Dinophyceae_unclassified	Dinophyceae_unclassified
OTU_228	0.0010084	5.27e-05	8.42e-05	9.68e-05	0.0003803	0.000302504	0	1.14e-05	0	0	0	0	0	0	0	2.25e-05	0	0	0	0	2.9e-05	0	0	2.35e-05	0	0	8.14e-05	0	0	0	0	0	0.000163328	0	Eukaryota	Alveolata	Dinoflagellata	Dinophyceae	Gymnodiniales	Gymnodiniaceae	Gyrodinium	Gyrodinium_helveticum
OTU_28	0.000420168	0.000105446	0.000105217	0.000184784	0	0	6.09e-05	2.28e-05	0	0	0	0	0	0	0	0.000225423	0	5.34e-05	0	0	0.000479122	0	0	0	0	0	0	0	0	0	0	0	0	0	Eukaryota	Alveolata	Dinoflagellata	Dinophyceae	Peridiniales	Thoracosphaeraceae	Thoracosphaeraceae_unclassified	Thoracosphaeraceae_unclassified
OTU_4325	0	2.64e-05	2.1e-05	1.76e-05	2.72e-05	0	0	0	0.000368053	0	0.000258506	0	0.000335266	0.00419876	0	0	0	0	0	0	0	0	0	0	0	1.46e-05	0	0	0	0	0	0	1.48e-05	1.47e-05	Eukaryota	Stramenopiles	Ochrophyta	Bolidophyceae	Parmales	Parmales_env_1	Parmales_env_1_X	Parmales_env_1_X_sp.
OTU_11512	0	0.00050087	0.000610257	0.000642346	0.000597615	0	0	0	5.45e-05	0.000335339	0.00244144	0	0.000502899	0	0.000139191	0	1.53e-05	0	0	0	0	0	0.000109182	0	4.61e-05	4.37e-05	0.000162807	0	0.000105393	0	0	0	0.00014848	0	Eukaryota	Alveolata	Ciliophora	Spirotrichea	Strombidiida_G	Strombidiida_G_X	Strombidiida_G_X_unclassified	Strombidiida_G_X_unclassified
OTU_1492	0.00012605	5.27e-05	6.31e-05	9.68e-05	0	0	0.000572048	0.00109247	1.36e-05	0	0	0	0	0	0	0.00114966	0.000673102	0.000106763	0	0	0	0	0	0	0	0	0	0	0	0	0	0	0	0	Eukaryota	Stramenopiles	Ochrophyta	Synurophyceae	Synurales	Synurales_X	Synurales_XX	Synurales_XX_sp.
OTU_4824	4.2e-05	0	0	3.52e-05	2.72e-05	6.37e-05	0	0	0	0	0	0	0	0	0	0	0	0	0	0	0	0	0	0	0	0	0.000122105	0	0	0	0	0	0.000653313	0	Eukaryota	Alveolata	Dinoflagellata	Dinophyceae	Gymnodiniales	Gymnodiniaceae	Gymnodiniaceae_unclassified	Gymnodiniaceae_unclassified
OTU_826	0.0303361	2.64e-05	0.00018939	3.52e-05	0.0003803	0.000652773	0	0	0	0	0	0	0.00421876	0	0	0	0	0	0	0	0	0	0	0	0	0	8.14e-05	4.16e-05	0	0	0	3.13e-05	0.00014848	1.47e-05	Eukaryota	Alveolata	Dinoflagellata	Dinophyceae	Dinophyceae_unclassified	Dinophyceae_unclassified	Dinophyceae_unclassified	Dinophyceae_unclassified
OTU_588	0	0	2.1e-05	0	2.72e-05	6.37e-05	0	0	0	0	0.000143614	0	0.000754348	0.000200502	0	0	0	0	0.000335544	3.53e-05	0.000304896	0.000184439	0.000136478	7.06e-05	0	0.000364575	0.000529122	0	7.03e-05	0	0	0.000563301	0.000579073	5.9e-05	Eukaryota	Alveolata	Ciliophora	Spirotrichea	Strombidiida	Strombidiida_unclassified	Strombidiida_unclassified	Strombidiida_unclassified
OTU_13855	0	2.64e-05	8.42e-05	3.52e-05	2.72e-05	3.18e-05	0	0	0	0.000600081	0.000330313	6.93e-05	0.00215129	0.000448182	0.000139191	0	0	0	0	0	0	9.22e-05	0	0.00117675	1.54e-05	0	2.04e-05	0.000166237	0	0.000107811	0.000297471	0.00104837	0.000103936	4.42e-05	Eukaryota	Archaeplastida	Chlorophyta	Mamiellophyceae	Mamiellales	Mamiellaceae	Micromonas	Micromonas_polaris
OTU_1358	0	0.00139716	0.00069443	0.000536754	0.00184717	0.00288175	0	0	0	0.000988369	0	0	0	0	0	0	0	0	0	0	0	0	0	0	0	0	0.000122105	0	0	0	0	0	0.00135117	0	Eukaryota	Alveolata	Dinoflagellata	Dinophyceae	Torodiniales	Torodiniaceae	Torodinium	Torodinium_robustum
OTU_1216	0	0	0	0	5.43e-05	0.000222898	0	0	0	0	0	0	0	0.00108507	0	0	0	0	0	0	0	1.54e-05	0.000109182	0.00014121	4.61e-05	0.00058332	0.000162807	0.000498712	3.51e-05	0	0	0.00266003	0.000876034	0.0020348	Eukaryota	Stramenopiles	Ochrophyta	Bacillariophyta	Bacillariophyta_X	Raphid-pennate	Fragilariopsis	Fragilariopsis_unclassified
OTU_4495	0	0	0	8.8e-06	0	0.000159213	0	0	1.36e-05	0	0	0	0	3.54e-05	0	0	0	0	0	0	0	1.54e-05	8.19e-05	0	1.54e-05	0.00029166	2.04e-05	0	0	0	0	1.56e-05	1.48e-05	0	Eukaryota	Opisthokonta	Choanoflagellida	Choanoflagellatea	Acanthoecida	Stephanoecidae_Group_H	Stephanoecidae_Group_H_unclassified	Stephanoecidae_Group_H_unclassified
OTU_3107	0	0	0	8.8e-06	0	0	0	0	0	0	0	0	0	0.000129737	0.000121792	0	0	0	0	0	0	0	2.73e-05	2.35e-05	0	8.75e-05	0.000142456	0	0	0	0	3.13e-05	4.45e-05	0.000132704	Eukaryota	Hacrobia	Telonemia	Telonemia_X	Telonemia_XX	Telonemia-Group-2	Telonema-Group-2	Telonema_antarcticum
OTU_1950	0	0	2.1e-05	8.8e-06	0	0.000429875	0	0	0	0	0	0	8.38e-05	0	0	0	0	0	0	0	0	0	0	2.35e-05	0	0	0	0.000415593	0	0	0	0.000250356	7.42e-05	0.000176939	Eukaryota	Alveolata	Dinoflagellata	Dinophyceae	Dinophyceae_unclassified	Dinophyceae_unclassified	Dinophyceae_unclassified	Dinophyceae_unclassified
OTU_7578	0	0.000474508	0.000736516	0.00058955	0.000434629	0.000191055	0	0	0	0	0	0	0	0	0	0	0	0	0	0.000141153	0	7.68e-05	0.000109182	0	1.54e-05	0	0	0	0	0	0	0	0	0	Eukaryota	Alveolata	Ciliophora	Ciliophora_X	Ciliophora_XX	Ciliophora_XXX	Mesodinium	Mesodinium_rubrum
OTU_3887	2.1e-05	0.000263616	0.00088382	0.00071274	0.000950751	0.000827907	3.65e-05	0	0	0.000335339	0	0	0.000251449	0	0	0	0	0	0	0	0	0	0	7.06e-05	1.54e-05	1.46e-05	0	4.16e-05	0	0	0.000330524	9.39e-05	0.000400897	1.47e-05	Eukaryota	Alveolata	Dinoflagellata	Dinophyceae	Gymnodiniales	Gymnodiniales_unclassified	Gymnodiniales_unclassified	Gymnodiniales_unclassified
OTU_1064	0	0.00247799	0.00149408	0.000985516	0.000516122	0	0	0	0.000558895	0.000758926	0.000315951	0	0	0	0	0.000157796	0	0	0	0.000917496	0.000275858	0.00502598	0.0033983	0.000729583	0.000245761	0.00507488	0.000183158	0.00631701	0.000526963	0	3.31e-05	0.00062589	0.000326657	0.000486582	Eukaryota	Alveolata	Ciliophora	Spirotrichea	Strombidiida	Strombidiidae_R	Strombidiidae_R_X	Strombidiidae_R_X_sp.
OTU_712	0	5.27e-05	8.42e-05	0.000149587	2.72e-05	0	0	7.97e-05	0	0.00372403	0.00126381	0.00157756	0	0.000577919	0	0	0	0	1.97e-05	3.53e-05	1.45e-05	0.000384249	0.00061415	0.00353024	0.00105984	0.000918729	0.00132281	0.00419749	0.000281047	0	0	0	0.0018857	0	Eukaryota	Rhizaria	Cercozoa	Filosa-Thecofilosea	Cryomonadida	Protaspa-lineage	Protaspa-lineage_X	Protaspa-lineage_X_sp.
OTU_1996	0	0	4.21e-05	0	0	0	0	0	0	0	0	0	0	0	0	0	0	0	0	0.000546969	2.9e-05	0.000568688	0.000313899	0.000117675	0.000783362	5.83e-05	0.000203508	0	0.00361848	0	0	1.56e-05	1.48e-05	0.000280153	Eukaryota	Stramenopiles	Ochrophyta	Ochrophyta_unclassified	Ochrophyta_unclassified	Ochrophyta_unclassified	Ochrophyta_unclassified	Ochrophyta_unclassified
OTU_13940	0	0	0	0	8.15e-05	0.000143292	0	0	0.000422579	0.000705978	0.000976577	0	9.78e-05	0	0.00194867	9.02e-05	0	0	0	0.000105865	7.26e-05	0.000768498	0.00146031	0.000753118	0.000706562	0.000699984	0.00166877	0.00203641	0.00161602	0	0	0.000704126	0.00149965	0.00138602	Eukaryota	Alveolata	Ciliophora	Spirotrichea	Strombidiida_B	Strombidiida_B_X	Strombidiida_B_XX	Strombidiida_B_XX_sp.
OTU_19327	0	0.000448147	0.000168347	0.000378368	0.00162986	0.000238819	0	0	0	0.000105897	0.000229783	0.00062409	9.78e-05	0.000743038	0	0	0	0	0	0	0	3.07e-05	1.36e-05	7.06e-05	1.54e-05	8.75e-05	0.000223859	0.000748067	0	0	0.00112378	0.000312945	0.000252417	0.00125332	Eukaryota	Opisthokonta	Choanoflagellida	Choanoflagellatea	Acanthoecida	Stephanoecidae_Group_D	Stephanoecidae_Group_D_X	Stephanoecidae_Group_D_X_sp.
OTU_51	0	0.000263616	0.000168347	0.000193584	0.000135822	0	0	0	0	0.00255917	0.00202496	0	0.000754348	0.000483565	0.000539365	0	0	0	0	0	0	4.61e-05	1.36e-05	0.000164745	9.22e-05	4.37e-05	4.07e-05	0	3.51e-05	0	0	0	0.00126208	0	Eukaryota	Stramenopiles	Stramenopiles_X	MAST	MAST-2	MAST-2D	MAST-2D_X	MAST-2D_X_sp.
OTU_211	0	0	0	8.8e-06	0	0.00853381	0	0	0	0	0	0	0	0.000872775	0	0	0	0	0	0	0	0	0	0	1.54e-05	7.29e-05	2.04e-05	0	0.000105393	0	0	0	0.000386049	1.47e-05	Eukaryota	Stramenopiles	Ochrophyta	Chrysophyceae	Chrysophyceae_X	Chrysophyceae_X_unclassified	Chrysophyceae_X_unclassified	Chrysophyceae_X_unclassified
OTU_206	0	5.27e-05	8.42e-05	9.68e-05	0.00019015	0.0141381	0	0	0.000790632	0	7.18e-05	0	0.00275197	5.9e-05	0	0	0	0	1.97e-05	0.000141153	4.36e-05	0.00016907	0.00061415	0.00273005	0.000276481	0.0216995	0.00154666	0.00361566	0.000667486	0.00520188	0.00152041	0.0135818	0.00665192	0.01445	Eukaryota	Alveolata	Ciliophora	Spirotrichea	Strombidiida	Strombidiida_unclassified	Strombidiida_unclassified	Strombidiida_unclassified
OTU_1555	0.000462185	2.64e-05	6.31e-05	1.76e-05	0.000135822	0.00160805	1.22e-05	0	0.000149948	0	0.000215421	0	2.79e-05	0	0.000121792	0	0	0	0	3.53e-05	1.45e-05	1.54e-05	4.09e-05	2.35e-05	6.14e-05	0.000364575	0.000386666	0	3.51e-05	0	6.61e-05	0.000312945	0.0011136	7.37e-05	Eukaryota	Alveolata	Ciliophora	Spirotrichea	Strombidiida	Strombidiidae_M	Strombidiidae_M_unclassified	Strombidiidae_M_unclassified
OTU_882	0	0	0	8.8e-06	0	0	0	0	0.00104963	0.00229443	0.00126381	0	0	0.00273627	0	0	0	0	0	0	0	0.00012296	0.000327547	0	0.000414721	0.000495822	0.00116	0.00436373	0.000140523	0	0	0	0.000193024	0	Eukaryota	Stramenopiles	Ochrophyta	Bacillariophyta	Bacillariophyta_X	Polar-centric-Mediophyceae	Chaetoceros	Chaetoceros_unclassified
OTU_1497	0	0	0	0	0	3.18e-05	0	0	0	0.00127076	0.00127817	0	0	0.00334957	0.00127012	0	0	0	0	0	0	0	1.36e-05	0	0	4.37e-05	4.07e-05	0.0013299	0	0	0	0.00145519	0.000163328	7.37e-05	Eukaryota	Hacrobia	Telonemia	Telonemia_X	Telonemia_XX	Telonemia_XX_unclassified	Telonemia_XX_unclassified	Telonemia_XX_unclassified
OTU_1921	0.000315126	0	0	0	2.72e-05	0.000175134	0	0	0	0	0	0	0	0	0	0	0	0	0	0	0	0	0	0.00964933	0	0	0	0	0	0	0	0	0	0	Eukaryota	Alveolata	Dinoflagellata	Syndiniales	Dino-Group-III	Dino-Group-III_X	Dino-Group-III_XX	Dino-Group-III_XX_sp.
OTU_957	0	0	0	1.76e-05	0	1.59e-05	0	0	0	0	0	0	0	0	0	0	0	0	0	0	0	0	4.09e-05	0	1.54e-05	2.92e-05	0.000142456	0	0	0	0	0	1.48e-05	0.00188735	Eukaryota	Hacrobia	Telonemia	Telonemia_X	Telonemia_XX	Telonemia-Group-2	Telonemia-Group-2_X	Telonemia-Group-2_X_sp.
OTU_2072	0.00052521	0.00115991	0.0036405	0.00274537	0.00749735	0.00167173	7.3e-05	0	0	0	0	0	1.4e-05	0	0	0	0	0	0	0	0	1.54e-05	0	0	0	1.46e-05	0.000101754	0	0	0	0.00750289	0.000250356	0.000608769	2.95e-05	Eukaryota	Alveolata	Dinoflagellata	Dinophyceae	Dinophyceae_unclassified	Dinophyceae_unclassified	Dinophyceae_unclassified	Dinophyceae_unclassified
OTU_2676	0	0	0	0	0	0	1.22e-05	7.97e-05	5.45e-05	0	0	0	0	0	0	0	0.000122382	0	0.000434233	0.000105865	0.000116151	0	0	0	1.54e-05	0	0	0	0	0	0	0	0	0	Eukaryota	Alveolata	Ciliophora	CONThreeP	CONThreeP_X	Urotrichidae	Urotricha	Urotricha_sp.
OTU_2334	0	0	0	0	0	3.18e-05	0	0	0	0	0	0	0	0	0	0	0	0	0	0	0	0	0	0	0	0	0.000814034	0	0	0	0	0	0.00325172	0	Eukaryota	Alveolata	Dinoflagellata	Dinophyceae	Gymnodiniales	Gymnodiniaceae	Gyrodinium	Gyrodinium_helveticum
OTU_2149	0	0.00050087	0.000210433	0.000228781	0.000135822	1.59e-05	0	1.14e-05	0	0	0.00159412	0	0.000656562	0.000601507	0	0	0	0	0	0	0	0	0	0	0	1.46e-05	8.14e-05	4.16e-05	3.51e-05	0	0	0	0	1.47e-05	Eukaryota	Rhizaria	Cercozoa	Filosa-Thecofilosea	Cryomonadida	Protaspa-lineage	Protaspa-lineage_X	Protaspa-lineage_X_sp.
OTU_1362	0	0.000131808	2.1e-05	7.04e-05	0	0	0	0	0	1.76e-05	1.44e-05	5.2e-05	0	0.000389211	0.000400174	0	0	0	0	0	0	0	0.000136478	4.71e-05	4.61e-05	0.000277077	0.000122105	4.16e-05	7.03e-05	0	0	0.00028165	7.42e-05	0.000324388	Eukaryota	Hacrobia	Telonemia	Telonemia_X	Telonemia_XX	Telonemia-Group-2	Telonema-Group-2	Telonema_antarcticum
OTU_1145	0	0	0	0	0	0.00647996	0	0	0.0031489	0	0	0	0	0	0.00212266	0	0	0	1.97e-05	0	0	0	0	0	0	1.46e-05	2.04e-05	0	0	0	0	0	0.000133632	1.47e-05	Eukaryota	Alveolata	Ciliophora	CONThreeP	CONThreeP_X	Urotrichidae	Urotricha	Urotricha_sp.
OTU_3871	0	0.000237254	4.21e-05	5.28e-05	0.000162986	4.78e-05	0	1.14e-05	0	0.000123546	0.00010053	0	0.000251449	0.000153325	3.48e-05	0	0	0	0	1.76e-05	0	0.000261289	1.36e-05	0.00014121	0	4.37e-05	4.07e-05	0.000124678	3.51e-05	5.39e-05	3.31e-05	0.000344239	4.45e-05	7.37e-05	Eukaryota	Archaeplastida	Chlorophyta	Mamiellophyceae	Mamiellales	Mamiellaceae	Micromonas	Micromonas_polaris
OTU_3728	0.000756303	0.000263616	0.000336693	7.04e-05	0.000570451	3.18e-05	0	0	0	0.00063538	0.000258506	0.000329381	0.000488929	0.00232347	0	0	0	0	0	0	0	4.61e-05	8.19e-05	0	7.68e-05	0.000131247	0.000284912	0	0.000105393	0	0.00195009	0	0.000460289	1.47e-05	Eukaryota	Hacrobia	Haptophyta	Prymnesiophyceae	Prymnesiales	Chrysochromulinaceae	Chrysochromulina	Chrysochromulina_unclassified
OTU_627	0.00388655	2.64e-05	4.21e-05	4.4e-05	2.72e-05	0.00286583	0	0	0	0	0	0.00124818	0.00797653	0.000259474	0.0171205	0	0	0	1.97e-05	1.76e-05	0	0.000199809	0.000272956	0	0.00010752	0.000714567	4.07e-05	0	0	0	0	0.00272262	0.000237568	0.00368623	Eukaryota	Stramenopiles	Ochrophyta	Bacillariophyta	Bacillariophyta_X	Polar-centric-Mediophyceae	Chaetoceros	Chaetoceros_socialis
OTU_247	0	0.000369062	0.000210433	0.000131989	8.15e-05	0	0	0	0	0	0	0	0	1.18e-05	0	0	0	0	0	3.53e-05	0	0.000722388	0.000600502	0.00018828	0.000230401	0.0019687	8.14e-05	0	0.000456701	0	0	0.000140825	0.000386049	0.000235919	Eukaryota	Alveolata	Ciliophora	Spirotrichea	Strombidiida	Strombidiida_unclassified	Strombidiida_unclassified	Strombidiida_unclassified
OTU_3716	0	2.64e-05	0.000105217	8.8e-05	0.00019015	6.37e-05	0	0	0	0	0	0	0	0	0	0	1.53e-05	0	0	0	0	0	0	0	0	1.46e-05	2.04e-05	0	0	0	0	1.56e-05	1.48e-05	1.47e-05	Eukaryota	Alveolata	Dinoflagellata	Dinophyceae	Gymnodiniales	Gymnodiniales_unclassified	Gymnodiniales_unclassified	Gymnodiniales_unclassified
OTU_819	0.000819328	0.000131808	0.00088382	0.00126709	0	0	0.000109541	2.28e-05	0	0	0	0	0	0	0	4.51e-05	0.000152978	5.34e-05	1.97e-05	0	0	1.54e-05	0	0	0	0	0	0	0	0	0	0	0	0	Eukaryota	Hacrobia	Katablepharidophyta	Katablepharidaceae	Katablepharidales	Katablepharidales_X	Katablepharidales_XX	Katablepharidales_XX_sp.
OTU_23301	0	0	0	1.76e-05	0	4.78e-05	0	0	0	0	0	0	0	0	0	0	0	0	0	0	0	0	0	0	0	0	0.000183158	0	0	0	0	0	0.00109875	0	Eukaryota	Alveolata	Dinoflagellata	Dinophyceae	Gymnodiniales	Gymnodiniaceae	Gyrodinium	Gyrodinium_helveticum
OTU_632	0	0.00155533	0.00178868	0.00243739	0.00336837	0.00230859	0	0.000876255	0.00126774	0.000105897	8.62e-05	1.73e-05	1.4e-05	3.54e-05	0.00173989	4.51e-05	0	0.000195733	0.00116453	0.00319359	0.00124862	0.0001537	0.00323452	0.000164745	0.00473089	0.00907063	0.00348	0	0.00467241	0	0.000198314	0.000203414	0.00120269	0.000412858	Eukaryota	Alveolata	Ciliophora	Litostomatea	Haptoria_4	Didiniidae	Didiniidae_X	Didiniidae_X_sp.
OTU_22504	0	0	2.1e-05	0	2.72e-05	0.00103488	0	0	0	0	0	0	0	3.54e-05	0	0	0	0	0	0	0	0	1.36e-05	0	3.07e-05	0	4.07e-05	0.000124678	0	0	0	0.000109531	0.000400897	4.42e-05	Eukaryota	Hacrobia	Haptophyta	Prymnesiophyceae	Phaeocystales	Phaeocystaceae	Phaeocystis	Phaeocystis_pouchetii
OTU_1432	0.000714286	7.91e-05	0.000231477	0.000158387	0	0	0.0112949	7.97e-05	0	0	1.44e-05	0	0	2.36e-05	0	0.00302067	0.000107084	0	0	0	0	0	0	0	0	0	0	0	0	0	0	0	0	0	Eukaryota	Hacrobia	Cryptophyta	Cryptophyceae	Cryptophyceae_X	Cryptomonadales	Plagioselmis	Plagioselmis_nannoplanctica
OTU_7975	0	0.00416513	0.00069443	0.00132869	0.00353136	0	0	0	0.00115869	0.00291216	0.0030159	0.00395257	0.000726409	0.00647505	0.000748151	0	0	0	0	0	0	0.0001537	1.36e-05	0	1.54e-05	5.83e-05	2.04e-05	0.000166237	3.51e-05	0	0	0	4.45e-05	0	Eukaryota	Stramenopiles	Ochrophyta	Bacillariophyta	Bacillariophyta_X	Polar-centric-Mediophyceae	Chaetoceros	Chaetoceros_decipiens
OTU_21574	0	0.000395424	0.00025252	0.000175985	0.00127672	0.000206977	0	0	0	7.06e-05	7.18e-05	0	0	0	0	0	0	0	0	0	0	0	0	0	0	0	0	8.31e-05	0	0	0	0	0.000103936	1.47e-05	Eukaryota	Alveolata	Dinoflagellata	Dinophyceae	Gymnodiniales	Gymnodiniaceae	Gyrodinium	Gyrodinium_unclassified
OTU_415	0	0	0	0	5.43e-05	0	0	0	0.00231737	0	0	0.00272172	0	0	0	0	0	0	0	0	0	0	0	0	0	1.46e-05	0	0	0	0	0	0	0	1.47e-05	Eukaryota	Stramenopiles	Ochrophyta	Bacillariophyta	Bacillariophyta_X	Polar-centric-Mediophyceae	Chaetoceros	Chaetoceros_peruvianus
OTU_6508	0.000189076	0	8.42e-05	8.8e-05	0.0003803	0.000143292	0	0	0	0	0	0	0	0	0	0	0	0	0	0	0	0	0	0	0	0	0	0	0	0	0	0	0.000163328	0	Eukaryota	Alveolata	Dinoflagellata	Dinophyceae	Dinophyceae_unclassified	Dinophyceae_unclassified	Dinophyceae_unclassified	Dinophyceae_unclassified
OTU_12122	0	0	0	0	0	0	0	0	0	0	0	0	0	0	5.22e-05	0	0	0	0	0	0	6.15e-05	0.000464024	0	0	0.000320826	6.11e-05	0	0.000281047	0	0	0	0	0	Eukaryota	Alveolata	Ciliophora	Spirotrichea	Strombidiida	Strombidiidae_K	Strombidium_K	Strombidium_capitatum
OTU_1009	0	0.000105446	0.000168347	0.000149587	0.000407465	0.00036619	0.00483198	0	0	0.00423587	0.00143614	0	0	7.08e-05	1.74e-05	0	0	1.78e-05	0	0	0	0	0	0	0	0	2.04e-05	0	0	0	0	6.26e-05	0.000133632	1.47e-05	Eukaryota	Alveolata	Dinoflagellata	Dinophyceae	Dinophyceae_unclassified	Dinophyceae_unclassified	Dinophyceae_unclassified	Dinophyceae_unclassified
OTU_1967	0	0.000184531	8.42e-05	3.52e-05	0.00019015	0.00972791	0	0	0	0.00095307	0	0	0	0.00132096	0	0	0	0	0	0	0	0.000215179	0.000109182	0.000117675	0.0001536	0.000102081	0.000630876	0.00278447	0.000351309	0	0	0.00420911	0.00628072	0.00078148	Eukaryota	Hacrobia	Haptophyta	Prymnesiophyceae	Phaeocystales	Phaeocystaceae	Phaeocystis	Phaeocystis_pouchetii
OTU_879	0	0	4.21e-05	2.64e-05	8.15e-05	0.00167173	0	0	0	0	0	0	0	0	0	0	0	0	0	0	0	0	0	0	0	0	0	0	0	0	0	0	0	1.47e-05	Eukaryota	Stramenopiles	Stramenopiles_X	MAST	MAST-1	MAST-1B	MAST-1B_X	MAST-1B_X_sp.
OTU_22530	0	5.27e-05	2.1e-05	0	0	6.37e-05	0	3.41e-05	0	0.000300041	0.000143614	0	1.4e-05	0.000507153	0	0	0	0	0	0	0	1.54e-05	1.36e-05	0	4.61e-05	1.46e-05	2.04e-05	0	0	0	0	1.56e-05	2.97e-05	1.47e-05	Eukaryota	Hacrobia	Haptophyta	Prymnesiophyceae	Prymnesiophyceae_unclassified	Prymnesiophyceae_unclassified	Prymnesiophyceae_unclassified	Prymnesiophyceae_unclassified
OTU_1510	0.00241597	0.0003427	0.000589213	0.000545554	0	0	0	0	0	0	0	0	0	0	0	0.00130745	0.000979057	0	0	0	0	0	0	0	0	0	0	0	0	0	0	0	0	0	Eukaryota	Rhizaria	Cercozoa	Novel-clade-10-12	Novel-clade-10	Novel-clade-10_X	Novel-clade-10_XX	Novel-clade-10_XX_sp.
OTU_3724	0	0	0	0	0	0	0	0	0	0	0	0	0	0	0	0	0	0	0	0	0	1.54e-05	1.36e-05	0	0	0.00029166	0.00024421	0	0.000245916	0	0	0	0.000460289	0	Eukaryota	Alveolata	Dinoflagellata	Dinophyceae	Peridiniales	Amphidiniopsidaceae	Islandinium	Islandinium_tricingulatum
OTU_148	0.000294118	5.27e-05	0	5.28e-05	0	0	0	3.41e-05	0	0	0	0	0	0	0	0	1.53e-05	1.78e-05	0	0	0	0	0	0	0	0	0	0	0	0	0	0	0	0	Eukaryota	Alveolata	Dinoflagellata	Dinophyceae	Suessiales	Suessiaceae	Suessiaceae_unclassified	Suessiaceae_unclassified
OTU_11553	0.000105042	0	0	8.8e-06	0	0	7.3e-05	0.00238979	0.00094058	0	0	0	0	0	0	0.00633439	0.00532362	0.00590758	0.00313832	0.000194086	0.000101632	4.61e-05	0	0	1.54e-05	0	0	0	0	0	0	0	0	0	Eukaryota	Hacrobia	Cryptophyta	Cryptophyceae	Cryptophyceae_X	Basal_Cryptophyceae-1	Basal_Cryptophyceae-1_X	Basal_Cryptophyceae-1_X_sp.
OTU_16321	2.1e-05	5.27e-05	2.1e-05	1.76e-05	0.000135822	4.78e-05	0	0	0	0	0	0	2.79e-05	0	0	0	0	0	0	0	0	0	0	2.35e-05	0	0	0	4.16e-05	0	0	0	1.56e-05	2.97e-05	1.47e-05	Eukaryota	Alveolata	Dinoflagellata	Dinophyceae	Gymnodiniales	Gymnodiniaceae	Gyrodinium	Gyrodinium_unclassified
OTU_773	0	0.00113355	0.000336693	0.000272777	0.000597615	0	0	0	0	0	0	0	0	0	0	0	0	0	0	0	0	4.61e-05	4.09e-05	0	0	2.92e-05	0	0	3.51e-05	0	0	1.56e-05	0	0	Eukaryota	Stramenopiles	Ochrophyta	Bacillariophyta	Bacillariophyta_X	Polar-centric-Mediophyceae	Chaetoceros	Chaetoceros_decipiens
OTU_1241	2.1e-05	0	0	8.8e-06	0	0	0	6.83e-05	0.00160853	0	0	0	0	0	0	4.51e-05	0.000107084	0.000231321	0.000157903	3.53e-05	0	3.07e-05	8.19e-05	0	3.07e-05	0.000160413	2.04e-05	0	0	0	0	0	1.48e-05	2.95e-05	Eukaryota	Stramenopiles	Ochrophyta	Bacillariophyta	Bacillariophyta_X	Raphid-pennate	Navicula	Navicula_unclassified
OTU_1642	0	0.0003427	0.000526083	0.000316773	0.00111374	0.00049356	0	0	0.000149948	0	0.000789878	0.000676097	2.79e-05	0.00268909	0	0	0	0	0	0	0	0	0	0	0	0	0	0	0	0	0	0	0	0	Eukaryota	Opisthokonta	Opisthokonta_X	Opisthokonta_XX	Opisthokonta_XXX	Opisthokonta_XXXX	Opisthokonta_XXXXX	Opisthokonta_XXXXX_sp.
OTU_12386	0	0	0	0	0	0	0	0	0.000449843	0.000829524	0.000531373	0	0	0.000117943	0.0092388	0	0	0	0	1.76e-05	0.000159707	0.00104516	0.0024839	2.35e-05	0.000522241	0.00256661	0.00816069	0.000374034	0.000772879	0	0	0.000672832	0.000653313	4.42e-05	Eukaryota	Alveolata	Ciliophora	Spirotrichea	Strombidiida	Strombidiidae_K	Strombidium_K	Strombidium_capitatum
OTU_597	0.000231092	0.000131808	0.000105217	7.92e-05	0.00019015	0.000652773	0	0	0	0	0	0	0	0	0	0	0	0	0	0	0	0	0	0	0	0	0.000183158	0	0	0	0	0	1.48e-05	0	Eukaryota	Alveolata	Dinoflagellata	Dinophyceae	Dinophyceae_unclassified	Dinophyceae_unclassified	Dinophyceae_unclassified	Dinophyceae_unclassified
OTU_2175	0	0	2.1e-05	0	0	4.78e-05	0	0	0	0	0	0	0	0	0	0	0	0	5.92e-05	3.53e-05	0.000479122	0.000199809	1.36e-05	0	0	0	0.000142456	0	0	0	0	0.000297298	5.94e-05	0	Eukaryota	Hacrobia	Cryptophyta	Cryptophyceae	Cryptophyceae_X	Cryptomonadales	Rhodomonas	Rhodomonas_sp.
OTU_575	0	0	0	0	0	0	0	2.28e-05	0	0	0	0	0	0	0	0	0	0.000231321	0.000177641	5.29e-05	0	1.54e-05	0	0	0	0	0	0	0	0	0	0	0	0	Eukaryota	Archaeplastida	Chlorophyta	Chlorophyceae	Chlamydomonadales	Chlamydomonadales_X	Neochlorosarcina	Neochlorosarcina_negevensis
OTU_592	0	5.27e-05	0	5.28e-05	2.72e-05	0.000541324	0	0	0.00104963	0	0	0	0.00206747	0.000483565	0	0	0	0	0	1.76e-05	0	0	2.73e-05	0	1.54e-05	4.37e-05	0.000183158	0	0	0	0	0	4.45e-05	0	Eukaryota	Hacrobia	Haptophyta	Prymnesiophyceae	Prymnesiophyceae_unclassified	Prymnesiophyceae_unclassified	Prymnesiophyceae_unclassified	Prymnesiophyceae_unclassified
OTU_8126	8.4e-05	0	2.1e-05	4.4e-05	0	0	0	0	0	0	0	0	0	0	0	0.00498185	0.0075418	0	0	0	0	0	0	0	0	0	0	0	0	0	0	0	0	0	Eukaryota	Alveolata	Ciliophora	Ciliophora_unclassified	Ciliophora_unclassified	Ciliophora_unclassified	Ciliophora_unclassified	Ciliophora_unclassified
OTU_374	0.00355042	0	2.1e-05	0	0	0.000175134	0	1.14e-05	0.00147221	0	0	0	0	0.00214656	0	0	0	0	1.97e-05	1.76e-05	0	0.00010759	1.36e-05	0.00174159	7.68e-05	1.46e-05	0	0	0	0	0	0	0	0.00286051	Eukaryota	Stramenopiles	Ochrophyta	Bacillariophyta	Bacillariophyta_X	Polar-centric-Mediophyceae	Thalassiosira	Thalassiosira_hispida
OTU_3156	0.00039916	5.27e-05	0.000105217	5.28e-05	0.000108657	0.000175134	0	0	0	0	0	0	5.59e-05	0	0	0	0	0	0	0	1.45e-05	0	0	0	0	0	0	0	0	0	3.31e-05	0	0.000118784	0	Eukaryota	Alveolata	Dinoflagellata	Dinophyceae	Gymnodiniales	Gymnodiniaceae	Gyrodinium	Gyrodinium_helveticum
OTU_3035	0	0	0	0	0	0	0	0	0.000354421	0.000864823	0.00040212	0	0	0.000188708	0.0077077	0	0	0	0	0	5.81e-05	0.0013833	0.0024839	9.41e-05	0.000460801	0.00249369	0.00879157	0.000540271	0.000983664	0	0	0.00062589	0.000608769	4.42e-05	Eukaryota	Alveolata	Ciliophora	Spirotrichea	Strombidiida	Strombidiidae_K	Strombidium_K	Strombidium_capitatum
OTU_105	4.2e-05	5.27e-05	0	8.8e-06	0	0	0.000243424	0.00253772	0.00203111	0	0	0	0	0	0	0.0109105	0.0100659	0.00487553	0.00341465	0.000352883	0.000290377	0	0	0	0	0	2.04e-05	0	0	0	0	0	0	0	Eukaryota	Hacrobia	Cryptophyta	Cryptophyceae	Cryptophyceae_X	Basal_Cryptophyceae-1	Basal_Cryptophyceae-1_X	Basal_Cryptophyceae-1_X_sp.
OTU_1334	0	0.000131808	4.21e-05	2.64e-05	5.43e-05	7.96e-05	0	0	9.54e-05	0	0	0	1.4e-05	0	0.000208786	0	0	0	0	5.29e-05	0	7.68e-05	2.73e-05	2.35e-05	3.07e-05	1.46e-05	0.000101754	0	7.03e-05	0	0	9.39e-05	4.45e-05	0.000132704	Eukaryota	Hacrobia	Cryptophyta	Cryptophyceae	Cryptophyceae_X	Cryptomonadales	Teleaulax	Teleaulax_gracilis
OTU_22426	2.1e-05	5.27e-05	8.42e-05	0.00012319	0.000353136	0.000238819	0	0	0	0	0	0	0.000600685	0	0	0	0	0	0	0	0	0	0	0.000376559	0	0	0	0	0	0	0	0	5.94e-05	0	Eukaryota	Alveolata	Dinoflagellata	Dinophyceae	Gymnodiniales	Gymnodiniaceae	Gyrodinium	Gyrodinium_unclassified
OTU_15679	0.000231092	0.000289977	0.00056817	0.000809531	0.00138538	0.000270662	0	0	0	0	0	0	0	0	0	0	0	0	0	0	0	0	0	0	0	0	0	0	0	0	0.00112378	0	4.45e-05	0	Eukaryota	Alveolata	Dinoflagellata	Dinophyceae	Dinophyceae_unclassified	Dinophyceae_unclassified	Dinophyceae_unclassified	Dinophyceae_unclassified
OTU_21785	0	5.27e-05	0.000147303	0.00012319	0.000271643	4.78e-05	0	0	0	0	0	0	0	0	0	0	0	0	0	0	0	0	0	0	0	0	2.04e-05	0	0	0	0	1.56e-05	2.97e-05	0	Eukaryota	Alveolata	Dinoflagellata	Dinophyceae	Dinophyceae_unclassified	Dinophyceae_unclassified	Dinophyceae_unclassified	Dinophyceae_unclassified
OTU_3893	0	0.000263616	8.42e-05	2.64e-05	0.000244479	1.59e-05	1.22e-05	0	0	0	0	0	0.00318503	0	0	0	0	0	0	0	0	0	0	0	0	0	0	0	0	0	0	0	2.97e-05	2.95e-05	Eukaryota	Alveolata	Dinoflagellata	Dinophyceae	Dinophyceae_unclassified	Dinophyceae_unclassified	Dinophyceae_unclassified	Dinophyceae_unclassified
OTU_825	0.000420168	0.000553593	0.000589213	0.00109111	0.000516122	0.00296136	0	0	0	1.76e-05	0.00229783	0	0.00134106	0	0	0	1.53e-05	8.9e-05	0	0	2.9e-05	0	0	0	0	0	0	0.000789627	0	0	0	0.000860599	0.000697857	0.000250664	Eukaryota	Alveolata	Dinoflagellata	Dinophyceae	Dinophyceae_unclassified	Dinophyceae_unclassified	Dinophyceae_unclassified	Dinophyceae_unclassified
OTU_1281	0	0	0	0	5.43e-05	0.00453757	0	0	0.000231737	0	0	0	0.00121534	0	0	0	0	1.78e-05	0	1.76e-05	0	9.22e-05	0.000327547	0.00155331	0.00013824	0.0118122	0.000427368	0.00145458	0.000316178	0.0024527	0.000528838	0.00611807	0.00288052	0.00567679	Eukaryota	Alveolata	Ciliophora	Spirotrichea	Strombidiida	Strombidiida_unclassified	Strombidiida_unclassified	Strombidiida_unclassified
OTU_3481	0.000651261	0.000869932	0.00176764	0.0011879	0.000869258	0.00280215	0	0	0	0.000158845	8.62e-05	0	8.38e-05	5.9e-05	0.000295781	2.25e-05	0	0.000213527	0	0	2.9e-05	0	0	0.00018828	0	0	0	0	0	0	0	0.000578948	0.000193024	0.000176939	Eukaryota	Alveolata	Dinoflagellata	Dinophyceae	Dinophyceae_unclassified	Dinophyceae_unclassified	Dinophyceae_unclassified	Dinophyceae_unclassified
OTU_1821	0.000105042	0.000184531	0.00012626	0.000105591	0	0	0	7.97e-05	0	0	0	0	0	0	0	0	0	8.9e-05	3.95e-05	1.76e-05	0	0	0	0	0	0	0	0	0	0	0	0	0	0	Eukaryota	Rhizaria	Cercozoa	Filosa-Thecofilosea	Filosa-Thecofilosea_X	Mataza-lineage	Mataza-lineage_X	Mataza-lineage_X_sp.
OTU_3029	0	0	0	0	0	0	0	0	0.00212653	0.00585962	0.00799931	0.00608488	0.0116086	0.0123486	0	0	0	0	0	0	0	0	0	0	0	0	0	0	0	0	0	0	0	0	Eukaryota	Rhizaria	Cercozoa	Filosa-Imbricatea	Filosa-Imbricatea_X	Novel-clade-2	Novel-clade-2_X	Novel-clade-2_X_sp.
OTU_790	0	0	0	0	0	0	0.000182568	5.69e-05	0	0	0	0	0	0	0	0.000338135	0	0	3.95e-05	0	0	0	0	0	0	0	0	0	0	0	0	0	0	0	Eukaryota	Archaeplastida	Chlorophyta	Chlorophyceae	Chlamydomonadales	Chlamydomonadales_X	Chlamydomonas	Chlamydomonas_unclassified
OTU_6513	0	7.91e-05	0	3.52e-05	2.72e-05	7.96e-05	0	0	0	0	1.44e-05	0	0	0	0	0	0	5.34e-05	0	0	0	0	0	0	0	0	0	0	0	0	6.61e-05	1.56e-05	0	0	Eukaryota	Alveolata	Dinoflagellata	Dinophyceae	Dinophyceae_unclassified	Dinophyceae_unclassified	Dinophyceae_unclassified	Dinophyceae_unclassified
OTU_13507	0.000294118	7.91e-05	6.31e-05	7.04e-05	0	0	0	0	0	0	0	0	0	0	0	0	0	0	1.97e-05	1.76e-05	0	0	0	0	0	0	0	0	0	0	0	0	0	0	Eukaryota	Rhizaria	Cercozoa	Filosa-Imbricatea	Filosa-Imbricatea_X	Novel-clade-2	Novel-clade-2_X	Novel-clade-2_X_sp.
OTU_23180	0	0	4.21e-05	2.64e-05	0.000135822	0.000191055	0	0	0	0	0	0	0	0	0	0	0	0	0	0	0	0	0	0	0	0	0	0	0	0	0	0.000328592	0.000237568	4.42e-05	Eukaryota	Alveolata	Dinoflagellata	Dinophyceae	Dinophyceae_unclassified	Dinophyceae_unclassified	Dinophyceae_unclassified	Dinophyceae_unclassified
OTU_6952	0	2.64e-05	0.000105217	7.04e-05	0.000244479	0.000111449	0	0	0	0	1.44e-05	0	1.4e-05	0	0	2.25e-05	0	0	0	0	0	0	0	0	0	0	0	8.31e-05	0	0	0	0	4.45e-05	0	Eukaryota	Alveolata	Dinoflagellata	Dinophyceae	Gymnodiniales	Gymnodiniales_unclassified	Gymnodiniales_unclassified	Gymnodiniales_unclassified
OTU_1034	0	0	0	0	0	1.59e-05	0	3.41e-05	0	0	0	0	0	0	0	0	0	0	1.97e-05	1.76e-05	0	0.000199809	2.73e-05	0	3.07e-05	0.000116664	0	0	7.03e-05	0	0	0	0	0.000560307	Eukaryota	Stramenopiles	Ochrophyta	Bacillariophyta	Bacillariophyta_X	Raphid-pennate	Raphid-pennate_unclassified	Raphid-pennate_unclassified
OTU_1801	0	2.64e-05	0	0	0	0	0	0	0	0	0	0	0	0	0	4.51e-05	1.53e-05	0.000160145	0.000177641	0	0	0	0	0	0	0	0	0	0	0	0	0	0	0	Eukaryota	Archaeplastida	Chlorophyta	Mamiellophyceae	Monomastigales	Monomastigaceae	Monomastigaceae_X	Monomastigaceae_X_sp.
OTU_23284	2.1e-05	0.000105446	0.000336693	0.000307974	0.00081493	0.000318426	0	0	0	0	0	0	0.00138297	0	0	0	0	0	0	0	0	1.54e-05	0	0.00103554	0	0	2.04e-05	0	0	0	0	0	0.000163328	0	Eukaryota	Alveolata	Dinoflagellata	Dinophyceae	Gymnodiniales	Gymnodiniaceae	Gyrodinium	Gyrodinium_dominans
OTU_2208	0	0	0	0	8.15e-05	3.18e-05	0	0	0	0	0	0	0	0	0	0	0	0	0	0	0	0	0	0	0	0	0.000223859	0	0	0	0	0	0.000400897	0	Eukaryota	Alveolata	Dinoflagellata	Dinophyceae	Gymnodiniales	Gymnodiniaceae	Gymnodiniaceae_unclassified	Gymnodiniaceae_unclassified
OTU_1457	0.00107143	0.000263616	0.0006313	0.00101191	0	0	0	0	0	0	0	0	0	0	0	0.000518473	0.000902568	0	0	0	0	0	0	0	0	0	0	0	0	0	0	0	0	0	Eukaryota	Rhizaria	Cercozoa	Novel-clade-10-12	Novel-clade-10	Novel-clade-10_X	Novel-clade-10_XX	Novel-clade-10_XX_sp.
OTU_334	0	0.00474508	0.00296711	0.00170706	0.00154837	0	0	0	0	1.76e-05	5.74e-05	0	1.4e-05	0	0.000121792	0	0	0	0	1.76e-05	0	1.54e-05	0.000709684	0	0.000307201	0.000247911	0.000101754	0	0.00168628	0	0	0	0.000207872	1.47e-05	Eukaryota	Alveolata	Ciliophora	Spirotrichea	Spirotrichea_unclassified	Spirotrichea_unclassified	Spirotrichea_unclassified	Spirotrichea_unclassified
OTU_6838	0	0.00888385	0.0187496	0.0213118	0.0165431	0	0	0	1.36e-05	0.00123546	0.0227916	0	0	0.000495359	0.00245324	0.000225423	0	0.000444848	0	0.000299951	4.36e-05	0.000568688	0.0112731	0.00447164	0.00430081	0.00316451	0.0817494	0.00627546	0.0142983	0	0.00181788	0	0.0115072	0.000648776	Eukaryota	Alveolata	Ciliophora	Spirotrichea	Strombidiida_F	Strombidiida_F_X	Strombidiida_F_XX	Strombidiida_F_XX_sp.
OTU_5309	0.000483193	2.64e-05	4.21e-05	8.8e-05	0.000217315	0.000159213	0	0	0	0	0	0	0	0	0	0	0	0	0	0	0	0	0	0	0	0	0.000142456	0.000457152	0	0	0	0	0.00161844	0	Eukaryota	Alveolata	Dinoflagellata	Dinophyceae	Gymnodiniales	Gymnodiniaceae	Gyrodinium	Gyrodinium_helveticum
OTU_2554	0.00237395	0.000184531	0.000147303	0.000131989	0	0	0	0	0	0	0	3.47e-05	0	1.18e-05	1.74e-05	0	0	0	0	0	0	0	0	0	0	0	2.04e-05	0	0	0	0	6.26e-05	0.00022272	5.9e-05	Eukaryota	Hacrobia	Telonemia	Telonemia_X	Telonemia_XX	Telonemia-Group-2	Telonema-Group-2	Telonema_antarcticum
OTU_2237	2.1e-05	0.0208256	0.032049	0.0151083	0.00277076	0.00036619	0	0	0	0.000423587	1.44e-05	0	0	0	0	2.25e-05	0	0	5.92e-05	0.000317595	0.000232302	0.00119886	0.000286603	0	0.000353281	5.83e-05	0.000732631	0.00195329	0	0	0	6.26e-05	0.000489985	0	Eukaryota	Alveolata	Dinoflagellata	Dinophyceae	Peridiniales	Peridiniales_unclassified	Peridiniales_unclassified	Peridiniales_unclassified
OTU_507	0	0	0	0	0	0.00165581	0	0	0	0	0	0.000225366	0.000181602	0	0	0	0	0	0	1.76e-05	0	3.07e-05	0.00024566	0.000117675	0.00010752	0.00418532	0.000223859	0.00236888	0.000351309	0	0	0.00871552	0.00124723	0.00135653	Eukaryota	Alveolata	Ciliophora	Spirotrichea	Strombidiida	Strombidiidae_H	Strombidiidae_H_X	Strombidiidae_H_X_sp.
OTU_3422	0	7.91e-05	0.000168347	0.000105591	2.72e-05	4.78e-05	0	0	0	0.000176494	0	0	0	0	0	0	0	0	0	0	0	4.61e-05	0	4.71e-05	1.54e-05	0	2.04e-05	0	0	0	0	0	0.000207872	0	Eukaryota	Alveolata	Dinoflagellata	Dinophyceae	Dinophyceae_unclassified	Dinophyceae_unclassified	Dinophyceae_unclassified	Dinophyceae_unclassified
OTU_82	0.0010084	0.000105446	8.42e-05	5.28e-05	0	0	0.0234783	0	0	0	0	0	0	0	0	0.00421541	0.00380914	5.34e-05	0	0	0	0	0	0	0	0	0	0	0	0	0	0	0	0	Eukaryota	Stramenopiles	Ochrophyta	Chrysophyceae	Chrysophyceae_X	Chrysophyceae_XX	Chrysophyceae_XXX	Chrysophyceae_XXX_sp.
OTU_3491	0.000189076	2.64e-05	0	5.28e-05	0	0	0	7.97e-05	0	0	1.44e-05	0	0	0	0	2.25e-05	0	1.78e-05	1.97e-05	0	0	0	0	0	0	0	0	0	0	0	0	0	0	0	Eukaryota	Hacrobia	Katablepharidophyta	Katablepharidaceae	Katablepharidales	Katablepharidales_X	Katablepharidales_XX	Katablepharidales_XX_sp.
OTU_3203	0	2.64e-05	0	0	0.000108657	0.000684615	0	0	0	0	0	0	0	0	0	0	0	0	0	0	0	0	0	0	0	0	0	4.16e-05	0	0	0	1.56e-05	0.000103936	0	Eukaryota	Hacrobia	Haptophyta	Prymnesiophyceae	Phaeocystales	Phaeocystaceae	Phaeocystis	Phaeocystis_pouchetii
OTU_1519	0.00153361	0.000158169	0.000399823	0.000360769	0	0	0	2.28e-05	0	0	0	0	0	1.18e-05	0	0.000473389	0	1.78e-05	3.95e-05	1.76e-05	8.71e-05	0	0	0	0	0	0	0	0	0	0	0	0	0	Eukaryota	Alveolata	Dinoflagellata	Dinophyceae	Peridiniales	Thoracosphaeraceae	Thoracosphaeraceae_unclassified	Thoracosphaeraceae_unclassified
OTU_21465	0	2.64e-05	4.21e-05	7.04e-05	5.43e-05	0.000796064	0	0	0	0	1.44e-05	0	0.00023748	0	0	2.25e-05	0	0	0	0	0	0	0	0.000117675	0	0	4.07e-05	0.000914305	0	0	0	0.000813657	8.91e-05	0.000383368	Eukaryota	Alveolata	Dinoflagellata	Dinophyceae	Dinophyceae_X	Dinophyceae_XX	Dinophyceae_XXX	Dinophyceae_XXX_sp.
OTU_36	0	2.64e-05	0.000105217	3.52e-05	2.72e-05	0.0362846	1.22e-05	0	0	0	0	0	0.00131312	4.72e-05	0.00384515	0	1.53e-05	0	0.00142113	0.000670478	0.00294733	0.00287418	0.000286603	0.00014121	0	2.92e-05	4.07e-05	8.31e-05	0	0	0	0.000375534	0	0.000796225	Eukaryota	Stramenopiles	Ochrophyta	Bacillariophyta	Bacillariophyta_X	Polar-centric-Mediophyceae	Thalassiosira	Thalassiosira_unclassified
OTU_22983	0.00039916	0.000474508	0.00134677	0.0011527	0.00154837	0.00146476	0	1.14e-05	0	0	0	0	0	3.54e-05	0	2.25e-05	0	5.34e-05	0	0	0	0	0	2.35e-05	0	0	0	0	0	0	0.00125599	6.26e-05	8.91e-05	0.000103214	Eukaryota	Alveolata	Dinoflagellata	Dinophyceae	Dinophyceae_unclassified	Dinophyceae_unclassified	Dinophyceae_unclassified	Dinophyceae_unclassified
OTU_103	0.000987395	0.000210893	0.000210433	7.92e-05	0	0	1.22e-05	0.00701004	2.73e-05	0	0	1.73e-05	0	0	0	0.0133451	0.0175771	0.00638801	0.00365151	0.00042346	0	1.54e-05	0	0	3.07e-05	1.46e-05	0	0	0	0	0	0	0	0	Eukaryota	Hacrobia	Cryptophyta	Cryptophyceae	Cryptophyceae_X	Basal_Cryptophyceae-1	Basal_Cryptophyceae-1_X	Basal_Cryptophyceae-1_X_sp.
OTU_188	0.000105042	0.000237254	0.00018939	0.000105591	0.000244479	9.55e-05	0	0	0	0	0	0	0	0	0	0	0	0	0	0	0	0	0	0	0	0	4.07e-05	0	0	0	0	0	2.97e-05	0	Eukaryota	Alveolata	Dinoflagellata	Dinophyceae	Gymnodiniales	Gymnodiniaceae	Gyrodinium	Gyrodinium_helveticum
OTU_1884	0	0	0	0	0	0	0	0	0.00121321	0	0	0	0	0	0	0	0	0	0	0	0	0	0	0	0	0	0	0	0	0	0	0	0	0	Eukaryota	Alveolata	Ciliophora	Phyllopharyngea	Cyrtophoria_7	Hartmannulidae	Hartmannulidae_X	Hartmannulidae_X_sp.
OTU_2143	0	0	0	0	0	0	0	3.41e-05	0	0	0	0	0	0.000648684	0	0	0	0	0	0	0	0	0	0	0	1.46e-05	0	0	0	0	0	0	0	0	Eukaryota	Rhizaria	Cercozoa	Filosa-Thecofilosea	Ebriida	TAGIRI1-lineage	TAGIRI1-lineage_X	TAGIRI1-lineage_X_sp.
OTU_23060	0	2.64e-05	0.00012626	2.64e-05	0.000162986	0.000175134	0.00634121	0	0	0.00462415	0.0024558	0	0	4.72e-05	0	0	0	0	0	0	0	0	0	0	0	0	0	0	0	0	0	0	0.000103936	0	Eukaryota	Alveolata	Dinoflagellata	Dinophyceae	Dinophyceae_unclassified	Dinophyceae_unclassified	Dinophyceae_unclassified	Dinophyceae_unclassified
OTU_1239	0	0	4.21e-05	3.52e-05	0	1.59e-05	0	0	0.0013359	0	0	0	0	0.00679349	0.00723793	0.000180339	0	0	1.97e-05	0	0	0	0	0	0	7.29e-05	2.04e-05	0	0	0	0	0	0.000252417	0.00119434	Eukaryota	Rhizaria	Cercozoa	Filosa-Thecofilosea	Ventricleftida	CCW10-lineage	CCW10-lineage_X	CCW10-lineage_X_sp.
OTU_3743	0	0.000158169	0.00012626	0.00011439	0	0	0	0	0	0	1.44e-05	0	0	0	0	0	0	0	0	7.06e-05	0	9.22e-05	0.000218364	2.35e-05	7.68e-05	0.000102081	0	0	0.000281047	0	0	0	0	1.47e-05	Eukaryota	Alveolata	Ciliophora	Spirotrichea	Strombidiida	Strombidiidae_R	Strombidium_R	Strombidium_biarmatum
OTU_21652	2.1e-05	2.64e-05	2.1e-05	7.04e-05	0.000135822	0.000238819	0	0	0	0	0	0	0	0	0	0	0	0	0	1.76e-05	0	0	0	9.41e-05	0	0	0.000345964	0.000207797	0	0	0	0	0.00155904	0	Eukaryota	Alveolata	Dinoflagellata	Dinophyceae	Dinophyceae_unclassified	Dinophyceae_unclassified	Dinophyceae_unclassified	Dinophyceae_unclassified
OTU_231	0.000861345	0.000289977	0.000105217	0.000184784	0	0	0	4.55e-05	0	0	0	0	0	0	0	0.00317847	0.00304426	1.78e-05	1.97e-05	0	0.000522678	0	0	0	0	0	0	4.16e-05	0	0	0.000297471	0	0	0	Eukaryota	Stramenopiles	Ochrophyta	Chrysophyceae	Chrysophyceae_X	Chrysophyceae_X_unclassified	Chrysophyceae_X_unclassified	Chrysophyceae_X_unclassified
OTU_6442	0	0	0	8.8e-06	5.43e-05	3.18e-05	0	0	0	0	0	0	0	0	0	0	0	0	0	0	0	0	0	0	0	0	0	0	0	0	0	0	0.000267265	0	Eukaryota	Alveolata	Dinoflagellata	Dinophyceae	Dinophyceae_unclassified	Dinophyceae_unclassified	Dinophyceae_unclassified	Dinophyceae_unclassified
OTU_1081	0	0	0	1.76e-05	0	0	0	2.28e-05	0	0	0	0	0	0.002465	0	0	0	0	0.0140928	0.000458748	0.0154626	0.000368879	0.000232012	7.06e-05	1.54e-05	0.000335409	0	0.00270135	0	0	0	0.00416217	0.000103936	0.00380419	Eukaryota	Rhizaria	Cercozoa	Filosa-Thecofilosea	Ventricleftida	CCW10-lineage	CCW10-lineage_X	CCW10-lineage_X_sp.
OTU_2471	0	0.000184531	0.000231477	0.000422364	0.00206449	0.000477639	0	0	0	0.000176494	0.000287228	0.000554747	0.000167633	0.000695861	0	0	0	0	0	0	0	0	2.73e-05	0.00014121	1.54e-05	0.00014583	0.000325614	0.000207797	0	0	0.000760205	0.00017212	0.000356353	0.000766735	Eukaryota	Opisthokonta	Choanoflagellida	Choanoflagellatea	Acanthoecida	Stephanoecidae_Group_D	Stephanoecidae_Group_D_X	Stephanoecidae_Group_D_X_sp.
OTU_403	0	0	0	0	0	0	0	0	0	0	0	0	0	0	0	0	0	0	0	0	0	6.15e-05	0	0	0	0	0	0	0	0	0	9.39e-05	0.00120269	0.000221174	Eukaryota	Stramenopiles	Ochrophyta	Bacillariophyta	Bacillariophyta_X	Bacillariophyta_X_unclassified	Bacillariophyta_X_unclassified	Bacillariophyta_X_unclassified
OTU_2977	0	5.27e-05	2.1e-05	3.52e-05	2.72e-05	0	0	0	0	0	0	0	0	0	1.74e-05	0	0	0	0	0.000105865	0	9.22e-05	0.00024566	2.35e-05	4.61e-05	0.000889563	2.04e-05	4.16e-05	0.000210785	0	0	0	0	2.95e-05	Eukaryota	Alveolata	Ciliophora	Spirotrichea	Strombidiida	Strombidiidae_R	Strombidiidae_R_X	Strombidiidae_R_X_sp.
OTU_59	0	0.00463964	0.00284085	0.00175985	0.00119523	0	0	0	0	0	1.44e-05	1.73e-05	0	0	0.00015659	0	0	0	0	0.00132331	0	0.000799238	0.00384867	0.000305954	0.00139776	0.00679568	0.000223859	0	0.00382926	0	0	0.000547654	0.00097997	0.00110587	Eukaryota	Alveolata	Ciliophora	Spirotrichea	Strombidiida	Strombidiida_unclassified	Strombidiida_unclassified	Strombidiida_unclassified
OTU_1700	0	0	0	0	0	0.00173542	0	0	0	0	0	0.00194161	0.00131312	0	0	0	0	0	0	5.29e-05	0	0.00012296	0.000354842	0.000329489	3.07e-05	0.00224578	0.000264561	0.00918461	3.51e-05	0	0	0.00331722	0.00484046	0.000176939	Eukaryota	Alveolata	Ciliophora	Spirotrichea	Strombidiida	Strombidiidae_H	Strombidiidae_H_X	Strombidiidae_H_X_sp.
OTU_21685	0	0.000105446	8.42e-05	7.92e-05	0.000217315	9.55e-05	0	0	0	0	0	0	5.59e-05	0	0	0	0	0	0	0	0	0	0	2.35e-05	0	0	0	0	0	0	0	0	0	0	Eukaryota	Alveolata	Dinoflagellata	Dinophyceae	Gymnodiniales	Gymnodiniaceae	Gyrodinium	Gyrodinium_unclassified
OTU_271	0.00109244	0	4.21e-05	8.8e-06	0.000271643	0.00275438	0	0	0.000163579	0	0.000229783	0	0.00141091	0	0.000104393	0	0	5.34e-05	0	0	0	4.61e-05	8.19e-05	4.71e-05	4.61e-05	0.000670818	0.000386666	0	7.03e-05	0	0.00013221	0.00045377	0.000994818	5.9e-05	Eukaryota	Alveolata	Ciliophora	Spirotrichea	Strombidiida	Strombidiidae_M	Strombidiidae_M_unclassified	Strombidiidae_M_unclassified
OTU_15734	0	0	0	0	0	0	0	0	0	0	0	0	0.000279388	0	0	0	0	0	1.97e-05	0	0	0	0	0	0	0	0	0	0	0	0	0	0	0	Eukaryota	Alveolata	Dinoflagellata	Dinophyceae	Dinophyceae_unclassified	Dinophyceae_unclassified	Dinophyceae_unclassified	Dinophyceae_unclassified
OTU_5843	0	0.000289977	0.000147303	2.64e-05	0.000298807	4.78e-05	0	0	0	0	0	0	0	0	0	0	0	0	0	0	0	0	0	0	0	0	0	0	0	0	0	0	0	0	Eukaryota	Hacrobia	Cryptophyta	Cryptophyceae	Cryptophyceae_X	Cryptomonadales	Teleaulax	Teleaulax_amphioxeia
OTU_808	0	5.27e-05	0.00012626	0.000158387	2.72e-05	0.00124186	0	0	0	0.00031769	0.00222602	0	0	0	0	0.000157796	0	0	0	1.76e-05	0	0.000922197	0.0024566	0	0	0.000860397	0.000854736	0.00162081	0.00179167	0	0	3.13e-05	0.00494439	0.000294898	Eukaryota	Alveolata	Ciliophora	Spirotrichea	Choreotrichida	Strobilidiidae_A	Strobilidiidae_A_X	Strobilidiidae_A_X_sp.
OTU_302	2.1e-05	0	2.1e-05	8.8e-06	0	0.000143292	2.43e-05	0.000409677	0.000163579	0	0	0	0	0	0	0.00232186	0.000367147	0.000622787	0.000907943	0.000317595	0.000435565	0.000568688	4.09e-05	2.35e-05	3.07e-05	1.46e-05	2.04e-05	0	3.51e-05	0	0	0	0	0	Eukaryota	Stramenopiles	Ochrophyta	Bacillariophyta	Bacillariophyta_X	Polar-centric-Mediophyceae	Stephanodiscus	Stephanodiscus_sp.
OTU_15576	2.1e-05	0.000263616	0.000462953	0.000193584	0.000624779	0.000222898	0	1.14e-05	0	0	0	0	0.0042467	0	0	0	0	0	0	0	0	1.54e-05	0	0.00143563	0	0	6.11e-05	0	0	0	0	0	0.000311809	0	Eukaryota	Alveolata	Dinoflagellata	Dinophyceae	Gymnodiniales	Gymnodiniaceae	Gyrodinium	Gyrodinium_unclassified
OTU_6994	0.000231092	0	2.1e-05	8.8e-06	0	0	0.00019474	0	0	0	0	0	0	0	0	0	6.12e-05	0	1.97e-05	0	0	0	0	0	0	0	0	0	0	0	0	0	0	0	Eukaryota	Alveolata	Dinoflagellata	Dinophyceae	Dinophyceae_unclassified	Dinophyceae_unclassified	Dinophyceae_unclassified	Dinophyceae_unclassified
OTU_5488	0	0	0	0	0	0.000413953	0	1.14e-05	0	0	0	0	0	0.0112635	0.0768334	0	0	0	0	0	0	4.61e-05	1.36e-05	0	0	0.000277077	2.04e-05	0	0	0	0	0	0.000282113	5.9e-05	Eukaryota	Opisthokonta	Choanoflagellida	Choanoflagellatea	Acanthoecida	Stephanoecidae_Group_H	Stephanoecidae_Group_H_unclassified	Stephanoecidae_Group_H_unclassified
OTU_1124	0	0	0	0	5.43e-05	0.000206977	0	0	0	0	0	0	0	0	0	0	0	0	0	0	0	0	0	0	0	0	0	0	0	0.000727724	0	0	0.000786946	0	Eukaryota	Stramenopiles	Stramenopiles_X	MAST	MAST-1	MAST-1C	MAST-1C_X	MAST-1C_X_sp.
OTU_5580	0.0010084	7.91e-05	2.1e-05	3.52e-05	0.000135822	0.00186279	2.43e-05	0	0.000381685	0	0.00070371	0	0	0	0.000591562	0	0	1.78e-05	0	0.000105865	0	1.54e-05	0.000286603	4.71e-05	0.00010752	0.00126872	0.000793683	0	0.000140523	0	0.000429681	0.000891893	0.00298445	0.000206429	Eukaryota	Alveolata	Ciliophora	Spirotrichea	Strombidiida	Strombidiidae_M	Strombidiidae_M_unclassified	Strombidiidae_M_unclassified
OTU_5570	0	5.27e-05	0	8.8e-06	0.000325972	0	0	0	0	0	0	0	0	0	0	0	0	0	0	0	0	0	0	0	0	1.46e-05	0	0	0	0	0	0	1.48e-05	0	Eukaryota	Alveolata	Dinoflagellata	Dinophyceae	Dinophyceae_unclassified	Dinophyceae_unclassified	Dinophyceae_unclassified	Dinophyceae_unclassified
OTU_3621	0.000210084	5.27e-05	4.21e-05	8.8e-06	0.000407465	0	0	0	0	0	0	0	0	0	0	0	0	0	0	0	0	0	0	0	0	0	2.04e-05	0	0	0	0	0	0	0	Eukaryota	Alveolata	Ciliophora	Spirotrichea	Strombidiida	Tontoniidae_B	Tontoniidae_B_X	Tontoniidae_B_X_sp.
OTU_3688	0.000840336	0.000131808	4.21e-05	3.52e-05	0	0	0	0	0	0	0	0	0	0	0	0	1.53e-05	0	0	0	0	0	0	0	0	0	0	0	0	0	0	0	0	0	Eukaryota	Archaeplastida	Chlorophyta	Chlorophyceae	Chlamydomonadales	Chlamydomonadales_X	Chlamydomonadales_X_unclassified	Chlamydomonadales_X_unclassified
OTU_477	0	2.64e-05	0	3.52e-05	0	4.78e-05	0	0	0.000204474	0	0	0	0	0	8.7e-05	0	0	0	0	0	0	4.61e-05	4.09e-05	7.06e-05	7.68e-05	0	0.000264561	0	0	0	0	0.000125178	0.000118784	0.000117959	Eukaryota	Hacrobia	Cryptophyta	Cryptophyceae	Cryptophyceae_X	Cryptomonadales	Teleaulax	Teleaulax_unclassified
OTU_3759	0	7.91e-05	0.000105217	0.000140788	0.000787765	6.37e-05	0	0	0	0	0	0	0	0	0	0	0	0	0	0	0	0	0	0	0	0	4.07e-05	0	0	0	0	0	5.94e-05	0	Eukaryota	Alveolata	Dinoflagellata	Dinophyceae	Dinophyceae_unclassified	Dinophyceae_unclassified	Dinophyceae_unclassified	Dinophyceae_unclassified
OTU_42	0.0101681	0.00271524	0.00269355	0.00289495	2.72e-05	0	0.030781	0.00926326	0.000777001	0	0	0	0	0	0.0108917	0.00311084	0.00523184	0.000338084	0.000157903	5.29e-05	2.9e-05	1.54e-05	0	0	0	0	0	0	0	0	0	0	0	0	Eukaryota	Stramenopiles	Ochrophyta	Chrysophyceae	Chrysophyceae_X	Chrysophyceae_Clade-C	Chrysophyceae_Clade-C_X	Chrysophyceae_Clade-C_X_sp.
OTU_21311	0	0.000131808	6.31e-05	7.92e-05	0.000624779	0.000222898	0	0	0	0	1.44e-05	0	0	0	0	0	0	0	0	0	0	0	0	0	0	0	4.07e-05	4.16e-05	0	0	0	1.56e-05	0.000400897	5.9e-05	Eukaryota	Alveolata	Dinoflagellata	Dinophyceae	Dinophyceae_unclassified	Dinophyceae_unclassified	Dinophyceae_unclassified	Dinophyceae_unclassified
OTU_7379	2.1e-05	2.64e-05	0.000168347	9.68e-05	0.000651944	1.59e-05	0	0	0	0	0	0	0	0	0	0	0	0	0	0	0	0	0	0	0	0	0	0	0	0	0	0	0	0	Eukaryota	Alveolata	Dinoflagellata	Dinophyceae	Dinophyceae_unclassified	Dinophyceae_unclassified	Dinophyceae_unclassified	Dinophyceae_unclassified
OTU_2090	0	0	0	8.8e-06	0	0.000143292	0	0	0	0.00360049	0.000330313	0.00062409	0.000307327	0.00221732	0	0	0	0	0	0	0	0	1.36e-05	4.71e-05	0	0	4.07e-05	0	3.51e-05	0.000107811	0	0.000234709	0	0	Eukaryota	Alveolata	Dinoflagellata	Syndiniales	Dino-Group-I	Dino-Group-I-Clade-1	Dino-Group-I-Clade-1_X	Dino-Group-I-Clade-1_X_sp.
OTU_5836	0	0	0	6.16e-05	0.000271643	0.000270662	0	0	0	0	0.000157976	1.73e-05	0	0	0	0	0	0	0	0	0	0	0	0	0	0	0	0	0	0	0	1.56e-05	4.45e-05	0	Eukaryota	Alveolata	Dinoflagellata	Dinophyceae	Dinophyceae_unclassified	Dinophyceae_unclassified	Dinophyceae_unclassified	Dinophyceae_unclassified
OTU_1771	0	5.27e-05	0	0	5.43e-05	0	0	0	0	0	0.00664934	0	0.00400922	0	0	0	0	0	0	0	0	0	0	0	0	1.46e-05	6.11e-05	0	0	0	0	0	4.45e-05	0	Eukaryota	Rhizaria	Cercozoa	Filosa-Thecofilosea	Cryomonadida	Protaspa-lineage	Protaspa-lineage_X	Protaspa-lineage_X_sp.
OTU_21695	0	5.27e-05	0.00025252	0.000422364	0.0003803	0.00203792	0	0	0	0	0	0.00419527	0.000265419	3.54e-05	0	0	0	0	0	0	0	1.54e-05	0	0	0	0	0	0.00170393	0	0	0	0.00131437	1.48e-05	0.000162194	Eukaryota	Alveolata	Dinoflagellata	Dinophyceae	Dinophyceae_unclassified	Dinophyceae_unclassified	Dinophyceae_unclassified	Dinophyceae_unclassified
OTU_2376	0	7.91e-05	0.00044191	0.000413565	0.000353136	0.000270662	0	0	0	0	0	0	0	0	8.7e-05	0	0	0	5.92e-05	0.00100572	0.000116151	4.61e-05	0.00165138	7.06e-05	0.000552961	0.00161871	0.000590175	0	0.000632356	0	3.31e-05	0	0.000118784	8.85e-05	Eukaryota	Alveolata	Ciliophora	Litostomatea	Haptoria_4	Didiniidae	Didiniidae_unclassified	Didiniidae_unclassified
OTU_15568	0	0.000158169	0.000105217	0.000175985	0.000679108	0.00335939	0	0	0	0	0	0	0	0	0	0	0	0	0	0	0	0	0	0	0	0	0	0.000664949	0	0	0	0	0	0	Eukaryota	Alveolata	Dinoflagellata	Dinophyceae	Dinophyceae_unclassified	Dinophyceae_unclassified	Dinophyceae_unclassified	Dinophyceae_unclassified
OTU_2124	0	0	0	0	0	0	0	0.000455197	0	0	0	0	0	0	0	0	0	0	1.97e-05	1.76e-05	0	1.54e-05	1.36e-05	0	0	0	0	0	0	0	0	0	0	0	Eukaryota	Stramenopiles	Ochrophyta	Bacillariophyta	Bacillariophyta_X	Raphid-pennate	Raphid-pennate_unclassified	Raphid-pennate_unclassified
OTU_863	0	0	0.00012626	2.64e-05	0.000162986	0.00113041	0	0	0	0.000282391	5.74e-05	0	1.4e-05	0.000235885	0	0	0	0	0	0	0	0	0	2.35e-05	0	0	0	0	0	0	0	0	1.48e-05	0	Eukaryota	Hacrobia	Haptophyta	Prymnesiophyceae	Prymnesiales	Chrysochromulinaceae	Chrysochromulina	Chrysochromulina_unclassified
OTU_13708	6.3e-05	0	2.1e-05	8.8e-06	0	0	2.43e-05	0.000637276	0.0015949	0	0	0	0	0	0	0.0076193	0.00748061	0.0185057	0.00957287	0.000741054	0.000203264	0.00012296	2.73e-05	0	6.14e-05	0	2.04e-05	0	0	0	0	0	0	0	Eukaryota	Hacrobia	Cryptophyta	Cryptophyceae	Cryptophyceae_X	Cryptophyceae_X_unclassified	Cryptophyceae_X_unclassified	Cryptophyceae_X_unclassified
OTU_5445	0	5.27e-05	0.000147303	3.52e-05	0.000135822	7.96e-05	0	0	0	0	0	0	0	0	0	0	0	0	0	0	0	0	0	0	0	0	0	0	0	0	0	0.000359887	5.94e-05	0	Eukaryota	Alveolata	Dinoflagellata	Dinophyceae	Dinophyceae_unclassified	Dinophyceae_unclassified	Dinophyceae_unclassified	Dinophyceae_unclassified
OTU_281	0	0	0	0	0	0	0	1.14e-05	0.00162216	0.00797755	0.00564404	0.00485403	0	0.00182811	0	0.000698812	0	0	7.9e-05	0.000811631	0.000116151	0.00290492	0.00412163	0.000964933	0.00351745	0.0012833	0.0072449	0.000124678	0.0102231	0	0	0.00126743	0.000564225	0.000176939	Eukaryota	Stramenopiles	Ochrophyta	Chrysophyceae	Chrysophyceae_X	Chrysophyceae_Clade-C	Chrysophyceae_Clade-C_unclassified	Chrysophyceae_Clade-C_unclassified
OTU_1054	0	7.91e-05	2.1e-05	3.52e-05	0.000353136	0.000222898	0	0	0	0.00543603	0.000588818	0.00239234	0	0.00485923	0.0015659	0	0	0	0	1.76e-05	0	0.00013833	0.000286603	0.000164745	0.000230401	0.000612486	0.00126175	0	0.000702617	0	0	0.00250356	0.000326657	0.000206429	Eukaryota	Stramenopiles	Ochrophyta	Pelagophyceae	Pelagomonadales	Pelagomonadaceae	Aureococcus	Aureococcus_anophagefferens
OTU_1491	0	2.64e-05	0	0	0	0.000238819	0	0	0	0	4.31e-05	0	0	9.44e-05	0	0	0	0	1.97e-05	0.000123509	0	9.22e-05	9.55e-05	9.41e-05	4.61e-05	0.000422907	0.000162807	0	7.03e-05	0	0.000495786	0.00136131	0.000356353	2.95e-05	Eukaryota	Alveolata	Ciliophora	Spirotrichea	Strombidiida	Strombidiida_unclassified	Strombidiida_unclassified	Strombidiida_unclassified
OTU_905	0	0.000237254	0.000547127	0.000967918	0.000325972	0	0	0	0	0.00483595	0.0102253	0	0.00244465	0.00119122	0	0	0	0	0	0	1.45e-05	0.000261289	8.19e-05	0.00103554	6.14e-05	2.92e-05	0.000407017	0	0	0	0	0	0	0	Eukaryota	Rhizaria	Cercozoa	Filosa-Imbricatea	Filosa-Imbricatea_X	Novel-clade-2	Novel-clade-2_X	Novel-clade-2_X_sp.
OTU_13029	0	0.00134444	0.000462953	0.000167186	0.000325972	0.000238819	2.43e-05	0	0.000272632	0	0	1.73e-05	0	0	0.00015659	9.02e-05	0	0	0	7.06e-05	0	0.000476469	5.46e-05	0.000117675	0.00018432	1.46e-05	0.000203508	0	7.03e-05	0	0	0.000140825	0.000133632	0.000235919	Eukaryota	Hacrobia	Cryptophyta	Cryptophyceae	Cryptophyceae_X	Cryptomonadales	Teleaulax	Teleaulax_gracilis
OTU_6326	0	0	0	0	0	0	0	0	0	0	0	0	0	0.00047177	0.000260983	0	0	0	0	0	0	0	1.36e-05	0	0	1.46e-05	0	0	0	0	0	0	0	0	Eukaryota	Opisthokonta	Choanoflagellida	Choanoflagellatea	Craspedida	Monosigidae_Group_B	Lagenoeca	Lagenoeca_antarctica
OTU_7581	0	0	0	6.16e-05	0.000461793	0	0	0	0	0	0	0	0	0	0	0	0	0	0	0	0	0	0	0	0	0	0	0	0	0	0	0	0	0	Eukaryota	Alveolata	Ciliophora	Litostomatea	Litostomatea_unclassified	Litostomatea_unclassified	Litostomatea_unclassified	Litostomatea_unclassified
OTU_1635	0	0	0	0	0	0	0	0	0	0	0	0	0	0	0	0	0	0	0	7.06e-05	0	0.000245919	4.09e-05	0	0	4.37e-05	0	0	0	0	0	0	0	0	Eukaryota	Rhizaria	Cercozoa	Cercozoa_X	Cercozoa_XX	Cercozoa_XXX	Cercozoa_XXXX	Cercozoa_XXXX_sp.
OTU_1670	0	0	0	0	0	0	0	0	0	1.76e-05	4.31e-05	0	0	0	0	0	0	0	0	0	0	0	0	2.35e-05	0	0	0.000142456	0	0	0	0	0	0.00014848	2.95e-05	Eukaryota	Opisthokonta	Choanoflagellida	Choanoflagellatea	Acanthoecida	Stephanoecidae_Group_D	Acanthocorbis	Acanthocorbis_unguiculata
OTU_2034	0.00548319	0	2.1e-05	9.68e-05	0	0	0	3.41e-05	0.00219469	0.00178259	0.00196751	0.00322446	0.00317105	0.007395	0.00236625	0	0	0	1.97e-05	3.53e-05	2.9e-05	0.000353509	0.00148761	0.000564839	0.00148992	0.00532279	0.00374456	0	0.00080801	0	9.92e-05	0	0.000415745	4.42e-05	Eukaryota	Stramenopiles	Ochrophyta	Chrysophyceae	Chrysophyceae_X	Chrysophyceae_Clade-C	Dinobryon	Dinobryon_faculiferum
OTU_2586	0.00012605	0	0	0.000105591	5.43e-05	0.0010508	0	0	0	0	0	0	2.79e-05	0	3.48e-05	0	0	0	0	0	0	0	0	0	0	1.46e-05	0	0	0	0	0	4.69e-05	0.000118784	0.000147449	Eukaryota	Alveolata	Dinoflagellata	Dinophyceae	Peridiniales	Thoracosphaeraceae	Thoracosphaeraceae_unclassified	Thoracosphaeraceae_unclassified
OTU_3773	0	0.000158169	0.000778603	0.000721539	0.0003803	0.000382111	0	0	0	0.000105897	0	0	0.000405113	0	0	0	0	0	0	0	0	0	0	0	0	0	0	0	3.51e-05	0	0	7.82e-05	8.91e-05	0	Eukaryota	Alveolata	Dinoflagellata	Dinophyceae	Dinophyceae_unclassified	Dinophyceae_unclassified	Dinophyceae_unclassified	Dinophyceae_unclassified
OTU_3088	0.000672269	2.64e-05	0	0	0	0.000302504	0	0	0	0	0	0	0	0	0	0	0	0	0	0	0	0	0	0	0	0	0	0	0	8.09e-05	0	0	0	0	Eukaryota	Alveolata	Dinoflagellata	Syndiniales	Dino-Group-III	Dino-Group-III_X	Dino-Group-III_XX	Dino-Group-III_XX_sp.
OTU_3696	2.1e-05	0.000131808	4.21e-05	8.8e-06	0.000543286	0	0	0	0	0	0	0	0	0	0	0	0	0	0	0	0	0	0	0	0	0	0	0	0	0	0	0	0	1.47e-05	Eukaryota	Alveolata	Dinoflagellata	Dinophyceae	Peridiniales	Thoracosphaeraceae	Pentapharsodinium	Pentapharsodinium_sp.
OTU_1784	0	0	2.1e-05	0.00011439	0	3.18e-05	0	0	0.000272632	0	0	0	0	0	0	0	0	0	0	5.29e-05	1.45e-05	0	9.55e-05	0	0.00010752	0	0	0	0	0	0	0	0	0	Eukaryota	Stramenopiles	Ochrophyta	Bacillariophyta	Bacillariophyta_X	Araphid-pennate	Araphid-pennate_unclassified	Araphid-pennate_unclassified
OTU_1450	0	0.000316339	0.000399823	0.000140788	0.000162986	0	0	0	1.36e-05	0	0	0	0	0	0	2.25e-05	0	0	1.97e-05	0.000617545	0	0.000568688	0.00162409	0.000117675	0.000537601	0.00166246	6.11e-05	8.31e-05	0.000702617	0	0	3.13e-05	0.000103936	4.42e-05	Eukaryota	Alveolata	Ciliophora	Spirotrichea	Strombidiida	Strombidiida_unclassified	Strombidiida_unclassified	Strombidiida_unclassified
OTU_869	0.000105042	0.000237254	0.000210433	0.000105591	0	0	0	3.41e-05	0	0	0	0	0	0	0	0	0	0	3.95e-05	3.53e-05	0	0	0	0	0	0	0	0	0	0	0	0	0	0	Eukaryota	Rhizaria	Cercozoa	Filosa-Thecofilosea	Filosa-Thecofilosea_X	Mataza-lineage	Mataza-lineage_X	Mataza-lineage_X_sp.
OTU_5945	0	5.27e-05	4.21e-05	7.04e-05	5.43e-05	0.000445796	0	0	0	0	0	0	0	0	0	0	0	0	0	0	0	1.54e-05	0	0	0	0	0	0	0	0	0	0	0	0	Eukaryota	Alveolata	Dinoflagellata	Dinophyceae	Dinophyceae_unclassified	Dinophyceae_unclassified	Dinophyceae_unclassified	Dinophyceae_unclassified
OTU_589	8.4e-05	2.64e-05	8.42e-05	6.16e-05	0	0	0.000413822	1.14e-05	0	0	0	0	0	0	0	0.000879151	0.00111674	3.56e-05	0	1.76e-05	0	0	0	0	0	0	0	0	0	0	0	0	0	0	Eukaryota	Stramenopiles	Ochrophyta	Chrysophyceae	Chrysophyceae_X	Chrysophyceae_Clade-C	Chrysophyceae_Clade-C_unclassified	Chrysophyceae_Clade-C_unclassified
OTU_3738	2.1e-05	0.000289977	0.000273563	0.000325572	0.000135822	0.000238819	0	0	0	0	0	0	0	0	0	0	0	0	0	0	0	0	0	0	0	0	0	0	0	0	0	0	2.97e-05	1.47e-05	Eukaryota	Alveolata	Dinoflagellata	Dinophyceae	Dinophyceae_unclassified	Dinophyceae_unclassified	Dinophyceae_unclassified	Dinophyceae_unclassified
OTU_3524	0	2.64e-05	0	0.000167186	5.43e-05	0.000477639	0	1.14e-05	0.00132226	0.00266507	0.00288665	0.0101935	0.00659356	0.021784	0.0121618	0	0	0	0	0	0.000188745	4.61e-05	0.000163773	0.000282419	3.07e-05	0.00147288	0.00107859	0.00311695	0.000105393	0	0.000396629	0.00259744	0.000564225	0.00165143	Eukaryota	Opisthokonta	Choanoflagellida	Choanoflagellatea	Acanthoecida	Stephanoecidae_Group_H	Stephanoecidae_Group_H_unclassified	Stephanoecidae_Group_H_unclassified
OTU_1099	0	0.00891021	0.00490309	0.00303574	0.00105941	0	0	0	0.000777001	8.82e-05	0.00126381	0.00228833	0.000153663	0.000271268	0.00203567	0.000338135	0	0	1.97e-05	0.000864563	8.71e-05	0.00894531	0.00913036	0.0116969	0.010752	0.00277077	0.000834385	0.00274291	0.00621816	0	0.000561891	0.00303557	0.00256871	0.000560307	Eukaryota	Alveolata	Ciliophora	Spirotrichea	Strombidiida	Strombidiidae_R	Strombidium_R	Strombidium_R_unclassified
OTU_731	0.000189076	0.0103337	0.0175501	0.00954719	0.00225464	0.00141699	0	0	0	0.000105897	4.31e-05	0	0	2.36e-05	0	6.76e-05	0	7.12e-05	5.92e-05	3.53e-05	0.000217783	0.000414989	4.09e-05	2.35e-05	0.00016896	0	0.000366315	0.000789627	3.51e-05	0	0	0	0.000193024	2.95e-05	Eukaryota	Alveolata	Dinoflagellata	Dinophyceae	Peridiniales	Peridiniales_unclassified	Peridiniales_unclassified	Peridiniales_unclassified
OTU_1880	0	0	4.21e-05	3.52e-05	5.43e-05	0.000461717	0	0	0	0	0	0	0	0	0	0	0	0	0	0	0	0	0	0	0	0	0	0	0	0	0	1.56e-05	1.48e-05	5.9e-05	Eukaryota	Opisthokonta	Choanoflagellida	Choanoflagellatea	Acanthoecida	Stephanoecidae_Group_D	Stephanoecidae_Group_D_X	Stephanoecidae_Group_D_X_sp.
OTU_23006	0.0259664	0.000105446	6.31e-05	0.000211182	0.000298807	0.00062093	0	0	0	0	0	0	0.000251449	0	0	0	0	0	0	0	0	4.61e-05	0	4.71e-05	0	0	0.000101754	0	0	0	0.000396629	1.56e-05	0.000727553	0	Eukaryota	Alveolata	Dinoflagellata	Dinophyceae	Gymnodiniales	Gymnodiniaceae	Gyrodinium	Gyrodinium_helveticum
OTU_3737	0	2.64e-05	0	0	0	0.000413953	0	0	0	0	0	0	0	0	0	0	0	0	0	0	0	0	0	0	0	0	0	0	0	0	0	0	5.94e-05	0	Eukaryota	Alveolata	Dinoflagellata	Dinophyceae	Dinophyceae_unclassified	Dinophyceae_unclassified	Dinophyceae_unclassified	Dinophyceae_unclassified
OTU_6583	0	2.64e-05	6.31e-05	0.00012319	0.000516122	0.000143292	0	0	0	0	0	0	0	0	0	0	0	0	0	0	0	0	0	0	0	0	2.04e-05	4.16e-05	0	0	0	0	0.000311809	0	Eukaryota	Alveolata	Dinoflagellata	Dinophyceae	Dinophyceae_unclassified	Dinophyceae_unclassified	Dinophyceae_unclassified	Dinophyceae_unclassified
OTU_22858	0	0.000237254	2.1e-05	0.000131989	0.00138538	0.000652773	0	0	0	0	0	1.73e-05	0.000754348	0	0	0	0	0	0	0	0	0	0	0	0	0	0	0	0	0	0	0	0	0	Eukaryota	Alveolata	Dinoflagellata	Dinophyceae	Gymnodiniales	Gymnodiniaceae	Gyrodinium	Gyrodinium_heterogrammum
OTU_641	0.000504202	0.000131808	0.00018939	7.92e-05	0	0	0	0	0	0	0	0	0	0	0	4.51e-05	1.53e-05	0	0	0	0	0	0	0	0	0	0	0	0	0	0	0	0	0	Eukaryota	Stramenopiles	Ochrophyta	Ochrophyta_unclassified	Ochrophyta_unclassified	Ochrophyta_unclassified	Ochrophyta_unclassified	Ochrophyta_unclassified
OTU_8909	0	0.00113355	0.00069443	0.000404766	0.00556869	0	0	0	0	0	0	0	0	0	0	0	0	0	0	0	0	0	0	0	0	0	0	0	0	0	0	0.000359887	0.000103936	7.37e-05	Eukaryota	Archaeplastida	Chlorophyta	Mamiellophyceae	Mamiellales	Mamiellaceae	Micromonas	Micromonas_commoda_C
OTU_545	0	0.00108083	0.000841733	0.000615948	8.15e-05	0	0	0	0	0	0	0	0	0	0	0	0	0	0	0	0	0	0.000177421	0	0	4.37e-05	0	0	3.51e-05	0	0	0	1.48e-05	0	Eukaryota	Alveolata	Ciliophora	Spirotrichea	Strombidiida	Tontoniidae_A	Tontoniidae_A_X	Tontoniidae_A_X_sp.
OTU_2720	0	0	0	0	0	0	0	0.000990054	0.00147221	0	0	0	0	0	0	0.000135254	0.000336551	0	0	0	0	0	0	0	0	0	0	0	0	0	0	0	0	0	Eukaryota	Rhizaria	Cercozoa	Novel-clade-10-12	Novel-clade-10	Novel-clade-10_X	Novel-clade-10_XX	Novel-clade-10_XX_sp.
OTU_988	0	0	2.1e-05	0	0	4.78e-05	0	0	0	0	0.000459565	0	0	0	0	0	0	0	0	0	0	1.54e-05	2.73e-05	0	0	2.92e-05	2.04e-05	0	3.51e-05	0	0	0.000391181	0	4.42e-05	Eukaryota	Rhizaria	Cercozoa	Filosa-Thecofilosea	Cryomonadida	Cryothecomonas-lineage	Cryothecomonas	Cryothecomonas_aestivalis
OTU_183	4.2e-05	5.27e-05	8.42e-05	3.52e-05	0	0	0.000231253	7.97e-05	9.54e-05	0	0	0	0	0	0	0	4.59e-05	0	0	0	0	0	0	0	0	0	0	0	0	0	0	0	0	0	Eukaryota	Rhizaria	Cercozoa	Filosa-Thecofilosea	Cryomonadida	Protaspa-lineage	Protaspa-lineage_X	Protaspa-lineage_X_sp.
OTU_820	0	0	0	0	0	0	0	0	0	0	0	0	0	0.000518947	0	0	0	0	0	5.29e-05	0.000188745	7.68e-05	6.82e-05	0	1.54e-05	0.000218745	0	0.00286759	3.51e-05	0	0.0020823	0	0.000386049	0.000722501	Eukaryota	Rhizaria	Cercozoa	Filosa-Thecofilosea	Filosa-Thecofilosea_X	Mataza-lineage	Mataza-lineage_X	Mataza-lineage_X_sp.
OTU_2101	0	2.64e-05	0	1.76e-05	2.72e-05	0.000238819	0	2.28e-05	0.00448479	0.0155668	0.0113886	0.0111123	0	0.0179862	0.00262723	0	0	0	0	0	0	0.00010759	6.82e-05	0	7.68e-05	0.000160413	0.000101754	0	0.000105393	0	0.0013882	0	4.45e-05	0.000103214	Eukaryota	Opisthokonta	Choanoflagellida	Choanoflagellatea	Acanthoecida	Acanthoecida_unclassified	Acanthoecida_unclassified	Acanthoecida_unclassified
OTU_727	0	0.000790847	0.00159929	0.00153987	0.00171135	0.00157621	1.22e-05	0.00994606	0.0118186	0.00398877	0.00010053	0.000572082	0	0.000837393	0.00695955	0.000360677	0	0.000996459	0.00611874	0.0110982	0.00688193	0.000384249	0.00424446	0.000706048	0.00207361	0.00263952	0.000895437	0.000124678	0.00189707	0	6.61e-05	3.13e-05	0.000371201	0.000412858	Eukaryota	Alveolata	Ciliophora	Litostomatea	Haptoria_4	Didiniidae	Didiniidae_X	Didiniidae_X_sp.
OTU_1839	2.1e-05	0	2.1e-05	0	0	0	0	0	0	0	0	0	0	0	0	0.00105949	0.00279949	3.56e-05	0	0	0	0	0	0	0	0	0	0	0	0	0	0	0	0	Eukaryota	Stramenopiles	Ochrophyta	Bacillariophyta	Bacillariophyta_X	Raphid-pennate	Navicula	Navicula_gregaria
OTU_4433	0	0	0	0	0	0	0	0	0	0	0	0.000329381	0	0	0	0	0	0	0	0	0	4.61e-05	0	0	0	1.46e-05	0	0	7.03e-05	0	0	0	0	0	Eukaryota	Hacrobia	Haptophyta	Prymnesiophyceae	Prymnesiales	Prymnesiales_unclassified	Prymnesiales_unclassified	Prymnesiales_unclassified
OTU_441	0	0	2.1e-05	0	0	1.59e-05	0	0	0	0	0	0	0	0	0	0	0	0	3.95e-05	0	0.000145188	0	0	0	0	0	4.07e-05	0	0	0	0	9.39e-05	4.45e-05	0	Eukaryota	Hacrobia	Cryptophyta	Cryptophyceae	Cryptophyceae_X	Cryptomonadales	Rhodomonas	Rhodomonas_sp.
OTU_3697	0	0.000184531	0	4.4e-05	0.000298807	4.78e-05	0	0	0	0	0	0	0	0	0	0	0	0	0	0	0	0	0	0	0	0	0	0	0	0	0	0	4.45e-05	0	Eukaryota	Alveolata	Dinoflagellata	Dinophyceae	Dinophyceae_unclassified	Dinophyceae_unclassified	Dinophyceae_unclassified	Dinophyceae_unclassified
OTU_1469	0	0	4.21e-05	0	0	3.18e-05	0	0	0	0	0	0	0	0	0	0	0	0	0	0	0	0	0	0	0	0	0.000101754	4.16e-05	0	0	3.31e-05	0.000109531	0.000489985	0.000176939	Eukaryota	Opisthokonta	Choanoflagellida	Choanoflagellatea	Acanthoecida	Stephanoecidae_Group_D	Stephanoecidae_Group_D_X	Stephanoecidae_Group_D_X_sp.
OTU_3210	0	0.000184531	0.000210433	0.000149587	0.000135822	0	0	0	0	0	0	0	0	0	0	0	0	0	0	0	0	1.54e-05	0	0	1.54e-05	0	0	0	0	0	0	0	1.48e-05	0	Eukaryota	Alveolata	Ciliophora	Spirotrichea	Strombidiida	Strombidiidae_R	Strombidium_R	Strombidium_R_unclassified
OTU_989	0	0.000131808	0.000294607	0.000219981	0.000407465	0.000191055	0	0	0	0.00437706	0.00768336	0	0	0.000860981	0	0	0	0	0	0	0	3.07e-05	5.46e-05	0	3.07e-05	0.00014583	0.000569824	0.0104729	3.51e-05	0	0.00102462	0	0.000430593	0.000191684	Eukaryota	Opisthokonta	Choanoflagellida	Choanoflagellatea	Acanthoecida	Stephanoecidae_Group_D	Stephanoecidae_Group_D_X	Stephanoecidae_Group_D_X_sp.
OTU_1155	0	2.64e-05	6.31e-05	0.000105591	0	0.00143292	0	5.69e-05	0	0.00187084	0.000933492	0.00410859	0	0.00888108	0.00414093	0	0	0	0	0.000123509	0.000188745	0.000553318	0.000109182	0	0.000245761	0	4.07e-05	0	0.000737748	0	0	0	0.00166298	4.42e-05	Eukaryota	Stramenopiles	Ochrophyta	Chrysophyceae	Chrysophyceae_X	Chrysophyceae_Clade-H	Chrysophyceae_Clade-H_X	Chrysophyceae_Clade-H_X_sp.
OTU_22322	0	0	0	8.8e-06	0	0	0	0	0	0	0	0	0	1.18e-05	0	0	0	0	0	0	0	0	8.19e-05	0	0	0.000320826	0	0	0	0	0	0	0	5.9e-05	Eukaryota	Opisthokonta	Choanoflagellida	Choanoflagellatea	Acanthoecida	Stephanoecidae_Group_H	Stephanoeca_Group_H	Stephanoeca_cauliculata
OTU_22547	0.00117647	2.64e-05	0	8.8e-06	0	6.37e-05	0	0	0	0	0	0	0.000153663	0	0	0	0	0	0	0	0	0	0	0	0	0	0	0	0	0	0	0	0.000118784	0	Eukaryota	Alveolata	Dinoflagellata	Dinophyceae	Gymnodiniales	Gymnodiniaceae	Gyrodinium	Gyrodinium_helveticum
OTU_23041	0	0.000131808	0.000294607	0.000211182	0.000353136	0.000843828	0	0	0	0	0.00070371	0	0.000614654	0	0	0	0	1.78e-05	0	0	0	0	0	0	0	0	0	0.000249356	0	0	0	0.000563301	0.00014848	0.000103214	Eukaryota	Alveolata	Dinoflagellata	Dinophyceae	Peridiniales	Thoracosphaeraceae	Thoracosphaeraceae_unclassified	Thoracosphaeraceae_unclassified
OTU_1036	0	0.000659039	0.00031565	0.000272777	0.00111374	0.00109857	0	0	0	0.000335339	0	0	0	0	0	0	0	0	0	0	0	0	0	0	0	0	0.000142456	0	0	0	0	0	0.000504833	0	Eukaryota	Alveolata	Dinoflagellata	Dinophyceae	Torodiniales	Torodiniaceae	Torodinium	Torodinium_robustum
OTU_2039	0	0	0	5.28e-05	8.15e-05	0	0	0	0	0	0	0	0.00210938	0	0	0	0	0	5.92e-05	0	0	0	0	0	0	0	4.07e-05	0	0	0	0	0	0.00132147	0	Eukaryota	Alveolata	Dinoflagellata	Dinophyceae	Dinophyceae_unclassified	Dinophyceae_unclassified	Dinophyceae_unclassified	Dinophyceae_unclassified
OTU_21601	0	7.91e-05	0.000105217	7.04e-05	0.000162986	7.96e-05	0	0	0	0	0	0	0	0	0	0	0	0	0	0	0	0	0	0	0	0	0	0	0	0	0	0	0.00014848	0	Eukaryota	Alveolata	Dinoflagellata	Dinophyceae	Dinophyceae_unclassified	Dinophyceae_unclassified	Dinophyceae_unclassified	Dinophyceae_unclassified
OTU_22247	0.000546218	0.00126536	0.00216746	0.00190944	0.000842094	0.0032161	0	0	0	0	2.87e-05	0	5.59e-05	0.000153325	5.22e-05	0.000157796	0	5.34e-05	0	0	0	0	0	0.000305954	0	0	4.07e-05	0	0	0	0	0.000500712	0.000326657	0.000398113	Eukaryota	Alveolata	Dinoflagellata	Dinophyceae	Dinophyceae_unclassified	Dinophyceae_unclassified	Dinophyceae_unclassified	Dinophyceae_unclassified
OTU_21671	0	0.000184531	0.00037878	0.000431163	0.000706272	0.00237227	0	0	0	0	0	0.00547812	0.000419082	2.36e-05	0	0	0	0	5.92e-05	0	0	0	0	0	0	0	0	0.00220264	0	0	0	0.00187767	7.42e-05	0.000280153	Eukaryota	Alveolata	Dinoflagellata	Dinophyceae	Dinophyceae_unclassified	Dinophyceae_unclassified	Dinophyceae_unclassified	Dinophyceae_unclassified
OTU_3111	0	0	0	0	0	0	0	0.000113799	0	0	0	0	0	0	0	0	1.53e-05	8.9e-05	0.000296068	0.000123509	0.000101632	3.07e-05	0	0	1.54e-05	0	0	0	0	0	0	0	0	0	Eukaryota	Stramenopiles	Ochrophyta	Bacillariophyta	Bacillariophyta_X	Raphid-pennate	Nitzschia	Nitzschia_unclassified
OTU_3154	0	0	0	1.76e-05	0	0.000111449	0	1.14e-05	4.09e-05	0.000158845	0.000143614	0.000398724	0.000307327	0.00139172	0.000556764	0	0	0	0	0	2.9e-05	1.54e-05	2.73e-05	0	1.54e-05	0.00029166	6.11e-05	0.000332474	0	0	0	0.000125178	7.42e-05	0.000117959	Eukaryota	Opisthokonta	Choanoflagellida	Choanoflagellatea	Acanthoecida	Stephanoecidae_Group_H	Stephanoecidae_Group_H_unclassified	Stephanoecidae_Group_H_unclassified
OTU_285	0	0	0	0	2.72e-05	0.00143292	0	1.14e-05	0	0	0	0	0	0	0	9.02e-05	0	0	0	0	0	0	9.55e-05	0.000211815	0.00010752	0.0100331	0.000895437	0	3.51e-05	0	0	0.000297298	0.00334081	0.01821	Eukaryota	Rhizaria	Radiolaria	Acantharea	Acantharea_X	Acantharea_XX	Acantharea_XXX	Acantharea_XXX_sp.
OTU_798	4.2e-05	0	0	8.8e-06	0	0	4.87e-05	0.00190045	0.000368053	0	0	0	0	0	0	0.00430558	0.00461993	0.00606772	0.0027633	0.00042346	0.000159707	4.61e-05	0	0	0	0	0	0	3.51e-05	0	0	0	0	0	Eukaryota	Hacrobia	Cryptophyta	Cryptophyceae	Cryptophyceae_X	Cryptophyceae_X_unclassified	Cryptophyceae_X_unclassified	Cryptophyceae_X_unclassified
OTU_4231	0	0	0	1.76e-05	0	0	0	0	0	3.53e-05	0	3.47e-05	0	0.000507153	1.74e-05	0	0	0	0	0	0	0	0	0	0	0.000131247	0	0	0	0	0	6.26e-05	1.48e-05	5.9e-05	Eukaryota	Opisthokonta	Choanoflagellida	Choanoflagellatea	Acanthoecida	Stephanoecidae_Group_H	Stephanoecidae_Group_H_unclassified	Stephanoecidae_Group_H_unclassified
OTU_679	0	0	0	0	0	0.00133739	0	0	0	0	0	0	0	0	0	0	0	0	0	0	0	0	0	0	0	0	0	0	0	0	0	0	0	0.000117959	Eukaryota	Hacrobia	Picozoa	Picozoa_X	Picozoa_XX	Picozoa_XXX	Picozoa_XXXX	Picozoa_XXXX_sp.
OTU_1075	0	0	4.21e-05	0.000765535	0.00255345	0	0	0	0.00227648	0	0.00215421	0.00329381	0.00279388	0	0	0	0	0	0	0	0	0	0	0	3.07e-05	0	0	0	0	0	0	0	0	0	Eukaryota	Alveolata	Ciliophora	Litostomatea	Haptoria_6	Lacrymariidae	Lacrymariidae_unclassified	Lacrymariidae_unclassified
OTU_500	0	0	6.31e-05	6.16e-05	8.15e-05	0.000429875	0	1.14e-05	0.000531632	0	0	0	0	0.000306651	0.000661157	0	0	0	1.97e-05	1.76e-05	2.9e-05	7.68e-05	1.36e-05	0	1.54e-05	0	0	0.00851966	0	0	0	0	0	0	Eukaryota	Stramenopiles	Ochrophyta	Bacillariophyta	Bacillariophyta_X	Polar-centric-Mediophyceae	Chaetoceros	Chaetoceros_neogracile
OTU_2556	4.2e-05	0	0.000168347	7.92e-05	0.00019015	9.55e-05	0	0	0	0	0	0	0.000600685	0	0	0	0	0	0	0	0	0	0	0	0	0	0	0	0	0	0	0	0	0	Eukaryota	Alveolata	Dinoflagellata	Dinophyceae	Dinophyceae_unclassified	Dinophyceae_unclassified	Dinophyceae_unclassified	Dinophyceae_unclassified
OTU_2953	6.3e-05	0	2.1e-05	3.52e-05	0.00019015	0.000111449	0	0	0	0	0	0	1.4e-05	0	0	0	0	0	0	0	0	0	0	0	0	0	0	0	0	0	0	0	0.000326657	0	Eukaryota	Alveolata	Dinoflagellata	Dinophyceae	Dinophyceae_unclassified	Dinophyceae_unclassified	Dinophyceae_unclassified	Dinophyceae_unclassified
OTU_4456	4.2e-05	0.000184531	0.000210433	8.8e-05	0.00105941	0.000413953	0	0	0	0	0	0	0	0	0	0	0	0	0	0	0	0	0	0	0	0	0	0	0	0	0	0	0.000801794	0	Eukaryota	Alveolata	Dinoflagellata	Dinophyceae	Dinophyceae_unclassified	Dinophyceae_unclassified	Dinophyceae_unclassified	Dinophyceae_unclassified
OTU_14713	0	0	0	2.64e-05	0	4.78e-05	0	0	9.54e-05	0.000776576	0.00070371	0	4.19e-05	0.00192246	0.00294041	0.000202881	0	0	0	3.53e-05	0	0.000307399	0.00107817	0.000823723	0.000691202	0.00332492	0.00299157	0.00220264	0.00112419	0	0.000793257	0.000156472	0.00195994	0.00168092	Eukaryota	Opisthokonta	Choanoflagellida	Choanoflagellatea	Acanthoecida	Stephanoecidae_Group_H	Diaphanoeca	Diaphanoeca_grandis
OTU_2927	0	0.000105446	4.21e-05	2.64e-05	2.72e-05	0.000350268	0	0	0	1.76e-05	0	0	0	2.36e-05	0.000434972	0.000135254	0	0	0	0	0	0	0.000300251	4.71e-05	0	0.00103539	2.04e-05	0	0	0	0	3.13e-05	2.97e-05	2.95e-05	Eukaryota	Alveolata	Ciliophora	Ciliophora_unclassified	Ciliophora_unclassified	Ciliophora_unclassified	Ciliophora_unclassified	Ciliophora_unclassified
OTU_1150	0.000693277	7.91e-05	0.00037878	0.000211182	0	0	0.000535534	0.00251497	0	0	0	0	0	0	0	0.000315593	0.000428338	0	0	0	0	0	0	0	0	0	0	0	0	0	0	0	0	0	Eukaryota	Stramenopiles	Ochrophyta	Ochrophyta_unclassified	Ochrophyta_unclassified	Ochrophyta_unclassified	Ochrophyta_unclassified	Ochrophyta_unclassified
OTU_3344	0	0	0	0	0	1.59e-05	0	0	0	0	0	0	0	0	1.74e-05	0	0	0	0	0	0	1.54e-05	0.000109182	0	0	2.92e-05	0	0	0	0	0	0	0	7.37e-05	Eukaryota	Alveolata	Ciliophora	CONThreeP	CONThreeP_X	Urotrichidae	Urotricha	Urotricha_sp.
OTU_6903	0	0.000237254	0.00044191	0.00012319	0.0003803	9.55e-05	0	0	0	0	0	0	0	0	0	0	0	0	0	0	0	0	0	0	0	0	0	0	0	0	0	0	0	0	Eukaryota	Alveolata	Dinoflagellata	Dinophyceae	Dinophyceae_unclassified	Dinophyceae_unclassified	Dinophyceae_unclassified	Dinophyceae_unclassified
OTU_5114	0	0	2.1e-05	0	0	0	0	0	0	0	0	0	0	0	0	0.000450846	0	0	0	0	0	0	0	0	0	0	0	0	0	0	0	0	2.97e-05	0	Eukaryota	Hacrobia	Telonemia	Telonemia_X	Telonemia_XX	Telonemia-Group-1	Telonemia-Group-1_X	Telonemia-Group-1_X_sp.
OTU_3018	0	0.000289977	0.000105217	7.04e-05	5.43e-05	0.0600392	0	0	1.36e-05	0	0.000416481	0	0	5.9e-05	0	0	0	1.78e-05	0.000197379	0.000141153	0.00075498	0.000691648	8.19e-05	2.35e-05	0	1.46e-05	4.07e-05	0	0	0	0	0.000672832	0	0.000604541	Eukaryota	Stramenopiles	Ochrophyta	Bacillariophyta	Bacillariophyta_X	Polar-centric-Mediophyceae	Thalassiosira	Thalassiosira_unclassified
OTU_3323	0	5.27e-05	0.000399823	0.000167186	0.00103224	0.00012737	0	0	0	0	0	0	0	0	0	0	0	0	0	0	0	0	0	0	0	0	0	4.16e-05	0	0	0	0	4.45e-05	0	Eukaryota	Alveolata	Dinoflagellata	Dinophyceae	Dinophyceae_unclassified	Dinophyceae_unclassified	Dinophyceae_unclassified	Dinophyceae_unclassified
OTU_294	0	0.000316339	0.000210433	9.68e-05	0.000353136	0.000191055	0	0	0	0.00218853	0.000904769	0.000294709	0.00934553	0.0022645	0.000469769	0	0	0	0	0	4.36e-05	0.000630168	8.19e-05	0.00280066	1.54e-05	5.83e-05	0.000264561	0.000789627	0.000140523	0.000323433	0.00198314	0.00380228	0.000712705	0.000147449	Eukaryota	Archaeplastida	Chlorophyta	Mamiellophyceae	Mamiellales	Mamiellaceae	Micromonas	Micromonas_polaris
OTU_393	0	0	8.42e-05	0	8.15e-05	0.002022	0	0	0	0	0	0	0	0	0	0	0	0	0	0	0	0	0	0	0	0	0.000142456	0	0	0	0	0	0	2.95e-05	Eukaryota	Hacrobia	Picozoa	Picozoa_X	Picozoa_XX	Picozoa_XXX	Picozoa_XXXX	Picozoa_XXXX_sp.
OTU_1137	0	0.000606316	0.000336693	0.000439963	0.0003803	0.000445796	0	0	0	0	0	0	0	0	0	0	0	0	0	0	0	0	0	2.35e-05	0	0	2.04e-05	0	0	0	0	3.13e-05	1.48e-05	4.42e-05	Eukaryota	Alveolata	Dinoflagellata	Dinophyceae	Dinophyceae_unclassified	Dinophyceae_unclassified	Dinophyceae_unclassified	Dinophyceae_unclassified
OTU_9206	0	2.64e-05	4.21e-05	1.76e-05	0	0	0	0	0	0	0	0	0	0	1.74e-05	0	0	0	0	1.76e-05	0	3.07e-05	0.000286603	0	4.61e-05	0	0	0	0	0	0	0	0	0	Eukaryota	Alveolata	Ciliophora	Spirotrichea	Strombidiida	Strombidiidae_R	Strombidium_R	Strombidium_biarmatum
OTU_15745	0.000168067	0.000158169	8.42e-05	7.92e-05	0.000325972	0.00049356	0	0	0	0	0.000186698	0	1.4e-05	0	0	0	0	0	0	0	0	0	0	0	0	0	0	0	0	0	0	0	0.000341505	0.000265408	Eukaryota	Alveolata	Dinoflagellata	Dinophyceae	Dinophyceae_unclassified	Dinophyceae_unclassified	Dinophyceae_unclassified	Dinophyceae_unclassified
OTU_709	0.000189076	0	6.31e-05	4.4e-05	0	0	0	0	0	0	0	0	0	0	0	0.0011722	0.00368676	0	1.97e-05	0	0	0	0	0	0	0	0	0	0	0	0	0	0	0	Eukaryota	Rhizaria	Cercozoa	Cercozoa_unclassified	Cercozoa_unclassified	Cercozoa_unclassified	Cercozoa_unclassified	Cercozoa_unclassified
OTU_933	2.1e-05	0.00100174	0.000399823	0.000158387	2.72e-05	0	0	0	0	0	0	0	0	2.36e-05	6.96e-05	0	0	0	0	0.000458748	0	0.00127571	0.00100994	0.000117675	0.00175104	0.000349992	0	0	0.00281047	0	0	3.13e-05	4.45e-05	1.47e-05	Eukaryota	Alveolata	Ciliophora	Spirotrichea	Strombidiida	Strombidiidae_R	Strombidium_R	Strombidium_R_unclassified
OTU_13076	0	0.000738124	0.00075756	0.000774334	0.000760601	0.000350268	0	0	0	0	0	0	0	0	0	4.51e-05	0	0	1.97e-05	0.000441104	0	6.15e-05	0.000232012	0	6.14e-05	0	0	0	3.51e-05	0	0	0	0	0	Eukaryota	Alveolata	Ciliophora	Ciliophora_X	Ciliophora_XX	Ciliophora_XXX	Mesodinium	Mesodinium_rubrum
OTU_23042	0	0.000316339	0.000336693	0.000527955	0.000760601	0.00300912	0	0	0	0	0	0.00816518	0.00071244	7.08e-05	0	0	0	0	0.000118427	0	0	0	2.73e-05	0	0	1.46e-05	0	0.00270135	0	0	0	0.00223756	5.94e-05	0.000176939	Eukaryota	Alveolata	Dinoflagellata	Dinophyceae	Dinophyceae_unclassified	Dinophyceae_unclassified	Dinophyceae_unclassified	Dinophyceae_unclassified
OTU_2080	0.000294118	0	2.1e-05	8.8e-06	0.000135822	0.000143292	0	0	0	0	0	0	1.4e-05	0	0	0	0	0	0	0	0	0	0	0	0	0	0	0	0	0	0	0	0.000193024	0	Eukaryota	Alveolata	Dinoflagellata	Dinophyceae	Dinophyceae_unclassified	Dinophyceae_unclassified	Dinophyceae_unclassified	Dinophyceae_unclassified
OTU_58	6.3e-05	0	0.00018939	0.000765535	0	0.000111449	0.00102238	0	0.00117232	0	0	0.00261771	0.000349235	0	0.00031318	0.00412524	0.00596613	0.00154807	0.00205274	0.000105865	0	3.07e-05	0.000136478	0	3.07e-05	0.000204162	2.04e-05	0	0	0	0	0	4.45e-05	0.000235919	Eukaryota	Alveolata	Ciliophora	CONThreeP	CONThreeP_X	Urotrichidae	Urotricha	Urotricha_sp.
OTU_3378	0	0	0	0	0	0	0	0	0	0	0	0	0	0	0	0	0	0	0	0	0	0	0	0	0	0	0	0	0	0	0	0	0	0.000398113	Eukaryota	Alveolata	Dinoflagellata	Syndiniales	Dino-Group-I	Dino-Group-I-Clade-5	Dino-Group-I-Clade-5_X	Dino-Group-I-Clade-5_X_sp.
OTU_2693	0	0	0	0	0	0	0	0	0	0	0	0	0	0	0	0	0	0.000533817	0.00037502	0	0	0	0	0	0	0	0	0	0	0	0	0	0	0	Eukaryota	Rhizaria	Cercozoa	Filosa-Imbricatea	Filosa-Imbricatea_X	Novel-clade-2	Novel-clade-2_X	Novel-clade-2_X_sp.
OTU_1384	0	0	0	0	0	0.000111449	0	0	0	0	0	0	0	0	5.22e-05	4.51e-05	0	0	0	3.53e-05	0	1.54e-05	2.73e-05	0	1.54e-05	0	0	0	7.03e-05	0	0	1.56e-05	0	7.37e-05	Eukaryota	Alveolata	Ciliophora	Spirotrichea	Strombidiida_B	Strombidiida_B_X	Strombidiida_B_XX	Strombidiida_B_XX_sp.
OTU_861	0	0	0	0	0	0	0.000146055	0.000728316	0	0	0	0	0	0	0	2.25e-05	4.59e-05	3.56e-05	0	0	0	0	0	0	0	0	0	0	0	0	0	0	0	0	Eukaryota	Stramenopiles	Ochrophyta	Chrysophyceae	Chrysophyceae_X	Chrysophyceae_Clade-F	Chrysophyceae_Clade-F_X	Chrysophyceae_Clade-F_X_sp.
OTU_1070	0	5.27e-05	0	4.4e-05	0.000108657	0.000238819	0	0	0	0	0	0	0	1.18e-05	0	0	0	0	0	0	0	0	0	0	0	0	0	0	0	0	0	1.56e-05	0	0	Eukaryota	Opisthokonta	Choanoflagellida	Choanoflagellida_unclassified	Choanoflagellida_unclassified	Choanoflagellida_unclassified	Choanoflagellida_unclassified	Choanoflagellida_unclassified
OTU_4746	0	0	0	1.76e-05	0	0.000238819	0	0	0	0	1.44e-05	0.00041606	2.79e-05	0.000224091	0	0	0	0	0	0	0	0	1.36e-05	0	1.54e-05	2.92e-05	6.11e-05	0	0	0	0	0.000109531	7.42e-05	5.9e-05	Eukaryota	Opisthokonta	Choanoflagellida	Choanoflagellatea	Acanthoecida	Stephanoecidae_Group_H	Stephanoecidae_Group_H_unclassified	Stephanoecidae_Group_H_unclassified
OTU_476	0	0	0	0	0	0	0	1.14e-05	0	0	0	0	0	0	0	0.000428304	0	0.000373672	7.9e-05	0	4.36e-05	3.07e-05	0	0	0	0	0	0	0	0	0	0	0	0	Eukaryota	Archaeplastida	Chlorophyta	Chlorophyceae	Chlamydomonadales	Chlamydomonadales_X	Wislouchiella	Wislouchiella_planctonica
OTU_15640	0	0	0.000168347	0.000105591	0.000407465	0.000175134	0	0	0	0	0	0	0	0	1.74e-05	0	0	0	0	0	0	0	0	0	0	0	0	0	0	0	0	0	0	0	Eukaryota	Alveolata	Dinoflagellata	Dinophyceae	Torodiniales	Torodiniaceae	Kapelodinium	Kapelodinium_vestifici
OTU_1979	0	0	4.21e-05	9.68e-05	0	7.96e-05	0	0.000807975	0.001813	0	0	0	0	0	0.00015659	4.51e-05	0	0.000693963	0.00400679	0.00672242	0.00267147	0.00013833	0.0024839	4.71e-05	0.000445441	0.00129789	0.000325614	0	0.000772879	0	0	0	5.94e-05	8.85e-05	Eukaryota	Alveolata	Ciliophora	Litostomatea	Haptoria_4	Didiniidae	Didiniidae_X	Didiniidae_X_sp.
OTU_1658	0	0.000237254	0.000273563	0.00023758	0.000461793	0.000302504	0	0	0	0	0	0	2.79e-05	0	0	0	0	0	0	0	0	0	0	0.00018828	0	0	4.07e-05	0	0	0	0	0	4.45e-05	2.95e-05	Eukaryota	Alveolata	Dinoflagellata	Dinophyceae	Dinophyceae_unclassified	Dinophyceae_unclassified	Dinophyceae_unclassified	Dinophyceae_unclassified
OTU_1383	0.00134454	0.0003427	0.000105217	4.4e-05	0.000244479	0.00208569	3.65e-05	0	0.000272632	0	0.000258506	0	0.0116225	0	0.000504567	0	0	3.56e-05	0	5.29e-05	1.45e-05	0.000184439	0.00116006	7.06e-05	0.000645122	0.00226036	0.000895437	0	0.000456701	0	0.000198314	0.000672832	0.00224205	0.000280153	Eukaryota	Alveolata	Ciliophora	Spirotrichea	Strombidiida	Strombidiida_unclassified	Strombidiida_unclassified	Strombidiida_unclassified
OTU_1100	0.00132353	0.000210893	6.31e-05	0.00023758	0	0	0	0	0	0	0	0	0	0	0	0	9.18e-05	0	0	0	0	0	0	0	0	0	0	0	0	0	0	0	0	0	Eukaryota	Stramenopiles	Ochrophyta	Chrysophyceae	Chrysophyceae_X	Chrysophyceae_Clade-C	Dinobryon	Dinobryon_unclassified
OTU_23132	0	2.64e-05	4.21e-05	8.8e-06	0.000108657	0.00012737	0	0	0	0	1.44e-05	0	0.00312915	0	0	0	0	0	0	0	0	0	0	0	0	0	0	0	0	0	0	0	0	4.42e-05	Eukaryota	Alveolata	Dinoflagellata	Dinophyceae	Dinophyceae_unclassified	Dinophyceae_unclassified	Dinophyceae_unclassified	Dinophyceae_unclassified
OTU_21558	0	0	0	0	0.000217315	0.000159213	0.00153357	0	0	0.00105897	0.00040212	0	0	3.54e-05	0	0	0	0	0	0	0	0	0	0	0	0	0	0	0	0	0	0	1.48e-05	0	Eukaryota	Alveolata	Dinoflagellata	Dinophyceae	Dinophyceae_unclassified	Dinophyceae_unclassified	Dinophyceae_unclassified	Dinophyceae_unclassified
OTU_2546	0	2.64e-05	4.21e-05	1.76e-05	0.000162986	3.18e-05	0	0	0	0	0	0	0.000600685	0	0	0	0	0	0	0	0	0	0	0	0	0	0	0	0	0	0	0	0.000118784	0	Eukaryota	Archaeplastida	Chlorophyta	Mamiellophyceae	Mamiellales	Mamiellaceae	Micromonas	Micromonas_unclassified
OTU_400	6.3e-05	5.27e-05	2.1e-05	8.8e-06	0	0	0	0	0	0	0	0	0	0	0	9.02e-05	4.59e-05	0.000142351	0	0	0	0	0	0	0	0	0	0	0	0	0	0	0	0	Eukaryota	Stramenopiles	Ochrophyta	Ochrophyta_unclassified	Ochrophyta_unclassified	Ochrophyta_unclassified	Ochrophyta_unclassified	Ochrophyta_unclassified
OTU_1170	2.1e-05	5.27e-05	2.1e-05	0.000299175	0.000162986	0.000302504	0	0	0	0	0	0	0	1.18e-05	0	0.000202881	0	0	0	0	0	0	0	0	0	0	0	0	0	0	0	0	1.48e-05	0	Eukaryota	Alveolata	Dinoflagellata	Dinophyceae	Dinophyceae_unclassified	Dinophyceae_unclassified	Dinophyceae_unclassified	Dinophyceae_unclassified
OTU_23328	0.00012605	2.64e-05	2.1e-05	8.8e-06	5.43e-05	0.000859749	0	0	0	0	2.87e-05	0	0.00528044	1.18e-05	0.000574163	0	0	0	0	0	1.45e-05	0.00016907	0	0	0	0	0	0.00311695	0	0	0	0.00286345	0.000861186	0.000884695	Eukaryota	Alveolata	Dinoflagellata	Dinophyceae	Dinophyceae_unclassified	Dinophyceae_unclassified	Dinophyceae_unclassified	Dinophyceae_unclassified
OTU_1354	0	2.64e-05	4.21e-05	1.76e-05	0	6.37e-05	0	0	0	0	0.00271431	0.00913598	0.00213732	0.00312548	0	0	0	0	0	0	0	4.61e-05	0.000354842	0	0.00010752	0.000685401	0.000345964	0	0.000456701	0	0	0	7.42e-05	0.00109112	Eukaryota	Stramenopiles	Ochrophyta	Bacillariophyta	Bacillariophyta_X	Bacillariophyta_X_unclassified	Bacillariophyta_X_unclassified	Bacillariophyta_X_unclassified
OTU_182	0.000252101	0.00129172	0.00241998	0.00216462	0.00184717	0.00257925	0	0	0	5.29e-05	0.00060318	0	0.000656562	5.9e-05	0	4.51e-05	0	7.12e-05	0	0	0	0	0	0.000400094	0	1.46e-05	2.04e-05	0.000124678	0	0	0	0.000187767	0.000326657	0.000398113	Eukaryota	Alveolata	Dinoflagellata	Dinophyceae	Dinophyceae_unclassified	Dinophyceae_unclassified	Dinophyceae_unclassified	Dinophyceae_unclassified
OTU_343	0	0.000316339	0.000210433	0.000175985	0.000108657	0	0	0	0	0	1.44e-05	3.47e-05	0	5.9e-05	0.00015659	0	0	0	0	0.000247018	0	0.000276659	0.00113277	0.000517769	0.00139776	0.00180829	0.000203508	4.16e-05	0.00186194	0	0	4.69e-05	0.000133632	0.000147449	Eukaryota	Alveolata	Ciliophora	Spirotrichea	Strombidiida	Strombidiidae_R	Strombidium_R	Strombidium_R_unclassified
OTU_2272	0	0	4.21e-05	0	0.000108657	0.000477639	0	0	0.0015949	0.000405937	0.00280048	0	0	0.00202861	0.00111353	0	0	0	0	0	0	0.00010759	8.19e-05	0.000329489	1.54e-05	0.000116664	0.000223859	0	0.000105393	0.00757372	0.000627995	0.00129872	0.000460289	1.47e-05	Eukaryota	Stramenopiles	Stramenopiles_X	MAST	MAST-8	MAST-8A	MAST-8A_X	MAST-8A_X_sp.
OTU_2402	0	0	0	0	0	0.00165581	0	0	0	0	0	0	0	0	0	0	0	0	0	0	0	0	0	0	0	0	0	0	3.51e-05	0	0	1.56e-05	5.94e-05	1.47e-05	Eukaryota	Stramenopiles	Ochrophyta	Bacillariophyta	Bacillariophyta_X	Raphid-pennate	Fragilariopsis	Fragilariopsis_cylindrus
OTU_4738	0	0.000105446	2.1e-05	0.000228781	0	0	0	0	0	0	1.44e-05	6.93e-05	0	0.000306651	0.000139191	0	0	0	0	0	0	6.15e-05	6.82e-05	7.06e-05	3.07e-05	0.000160413	6.11e-05	8.31e-05	0	0	0	0.000125178	7.42e-05	0.000516072	Eukaryota	Hacrobia	Telonemia	Telonemia_X	Telonemia_XX	Telonemia-Group-2	Telonema-Group-2	Telonema_antarcticum
OTU_1229	0	0	0	0	0	9.55e-05	0	0	0	0	0	0	0.0102256	0	0	0	0	0	0	0	0	0	0	0	0	0	0	0	0	0.000539054	0	0	0.000593921	0	Eukaryota	Stramenopiles	Stramenopiles_X	MAST	MAST-1	MAST-1C	MAST-1C_X	MAST-1C_X_sp.
OTU_5082	0	0.000105446	4.21e-05	0.000105591	5.43e-05	0.00012737	7.3e-05	0	0	0	0	0	0	0	0	0	0	0	0	0	0	0	0	0	0	0	0	0	0	0	0	0	1.48e-05	0	Eukaryota	Alveolata	Dinoflagellata	Dinophyceae	Dinophyceae_unclassified	Dinophyceae_unclassified	Dinophyceae_unclassified	Dinophyceae_unclassified
OTU_7421	0	0	0	0	0	0	0	0	0	0	0	0	0	0	0	0	0	0	0	0	0	0.0001537	0.00036849	0	0	8.75e-05	0	4.16e-05	7.03e-05	0	0	0	0	0	Eukaryota	Alveolata	Ciliophora	CONTH_8	CONTH_8_X	CONTH_8_XX	CONTH_8_XXX	CONTH_8_XXX_sp.
OTU_1570	0	5.27e-05	6.31e-05	2.64e-05	5.43e-05	0.000143292	0	0	0	0	0	0	1.4e-05	0	0	0	0	0	0	0	0	3.07e-05	0	0	0	0	0	0	0	0	0	6.26e-05	4.45e-05	1.47e-05	Eukaryota	Hacrobia	Cryptophyta	Cryptophyceae	Cryptophyceae_X	Cryptomonadales	Teleaulax	Teleaulax_gracilis
OTU_2679	0	0	2.1e-05	1.76e-05	0	0.000541324	0	0	0.000122684	3.53e-05	0.00020106	0	0.000209541	0.00332598	0.000956938	0	0	0	0	0	0	0	0	0	0	0	6.11e-05	0.000748067	3.51e-05	0	0	0.000704126	0.000118784	0.000663521	Eukaryota	Stramenopiles	Stramenopiles_X	MAST	MAST-7	MAST-7A	MAST-7A_X	MAST-7A_X_sp.
OTU_21809	0	0.00134444	0.00183077	0.00443482	0.00605764	0	0	0	0	0.000511834	0	0	0.000447021	0	0	0	0	0	0	0	0	0	0.000150126	0	0	0	0	0	0	0	0	0	0	0	Eukaryota	Alveolata	Dinoflagellata	Dinophyceae	Gonyaulacales	Goniodomataceae	Alexandrium	Alexandrium_unclassified
OTU_839	0	0	0	0	0	0	0	0	0	0.000423587	0	0	0	0	0	0	0	0	0	3.53e-05	0	0	0	0	0	2.92e-05	0.000101754	0	0	0	0	0	0.000252417	0	Eukaryota	Alveolata	Dinoflagellata	Dinophyceae	Dinophyceae_unclassified	Dinophyceae_unclassified	Dinophyceae_unclassified	Dinophyceae_unclassified
OTU_4019	0	0.000210893	0.00050504	0.000272777	0.000298807	0	0	0	0	0	5.74e-05	0	0	0	8.7e-05	0	0	0	0	0	0	0	4.09e-05	0	0	8.75e-05	0.000305263	0	0.000245916	0	0	0	4.45e-05	0	Eukaryota	Alveolata	Ciliophora	Spirotrichea	Strombidiida	Tontoniidae_A	Laboea	Laboea_strobila
OTU_20528	0.00117647	0.000237254	0.000610257	0.000202383	0.000760601	0.00012737	0	0	0	0.00155315	0.00070371	0.000780112	0.00127122	0.00483565	0	0	0	0	0	0	0	4.61e-05	0.000204717	0.00014121	9.22e-05	0.00029166	0.00024421	0	0.000245916	0	0.00432986	0	0.000683009	1.47e-05	Eukaryota	Hacrobia	Haptophyta	Prymnesiophyceae	Prymnesiales	Chrysochromulinaceae	Chrysochromulina	Chrysochromulina_sp.
OTU_631	0	0.00084357	0.00220955	0.00269257	0.00241762	6.37e-05	0	0	1.36e-05	0.000176494	0.00324568	0	4.19e-05	3.54e-05	0.000347977	0	0	8.9e-05	1.97e-05	1.76e-05	1.45e-05	7.68e-05	0.00166503	0.000635444	0.000768002	0.000918729	0.0102568	0.000831186	0.00221324	0	0.00013221	0.000203414	0.00144026	0.000206429	Eukaryota	Alveolata	Ciliophora	Spirotrichea	Strombidiida_F	Strombidiida_F_X	Strombidiida_F_XX	Strombidiida_F_XX_sp.
OTU_9472	0	0	0	0	0	0	0	2.28e-05	0.000327158	0.00158845	0.00070371	0	0	0	0	0	0	0	0	0	0	0	5.46e-05	0	0	0	4.07e-05	0	3.51e-05	0	0	0	0	0	Eukaryota	Rhizaria	Cercozoa	Filosa-Imbricatea	Filosa-Imbricatea_X	Novel-clade-2	Novel-clade-2_X	Novel-clade-2_X_sp.
OTU_1083	0	0	0	0	2.72e-05	0	0	0	0	0	0	0	0	0.000459976	0	0	0	0	0	0	0	0	0	0	0	0	0	0	0	0	0	0	0	0	Eukaryota	Stramenopiles	Ochrophyta	Pelagophyceae	Sarcinochrysidales	Sarcinochrysidaceae	Ankylochrysis	Ankylochrysis_sp.
OTU_1372	0	0	0	0	0	0	0	0	0	0.00296511	0.00216857	0	0	0.00481206	0.00434972	0.000495931	0	0	0	0	0	6.15e-05	0.000423081	0	0.0001536	0.00107914	0.00109895	0.00411437	0.000597225	0	0.000925467	0	0.000801794	0.000339133	Eukaryota	Opisthokonta	Choanoflagellida	Choanoflagellatea	Acanthoecida	Stephanoecidae_Group_I	Stephanoecidae_Group_I_X	Stephanoecidae_Group_I_X_sp.
OTU_2374	0	7.91e-05	0.000105217	8.8e-05	0.000162986	0.00062093	0	0	0	0	0	1.73e-05	0	0	0	0	0	0	0	0	0	0	0	0	0	0	0	0	0	0	0	9.39e-05	0	0	Eukaryota	Alveolata	Dinoflagellata	Dinophyceae	Dinophyceae_unclassified	Dinophyceae_unclassified	Dinophyceae_unclassified	Dinophyceae_unclassified
OTU_2152	0.000588235	0.00123899	0.00210433	0.00184784	0.00268927	0.00401216	0	1.14e-05	0	0	1.44e-05	0	0.00071244	7.08e-05	0	9.02e-05	0	5.34e-05	0	0	1.45e-05	0	0	0.000282419	0	1.46e-05	0	0.000374034	0	0	0.000958519	0.000375534	0.000400897	0.000501327	Eukaryota	Alveolata	Dinoflagellata	Dinophyceae	Dinophyceae_unclassified	Dinophyceae_unclassified	Dinophyceae_unclassified	Dinophyceae_unclassified
OTU_2139	0	0	0	0	0	0	0	0	0	0	0	0	0	0	0	0	0	0	0	1.76e-05	0	9.22e-05	6.82e-05	0	6.14e-05	1.46e-05	0	0	0.000175654	0	0	0	2.97e-05	0.000368623	Eukaryota	Rhizaria	Cercozoa	Filosa-Thecofilosea	Ebriida	TAGIRI1-lineage	TAGIRI1-lineage_X	TAGIRI1-lineage_X_sp.
OTU_13062	0	0.0003427	0.000168347	0.000149587	0.000217315	3.18e-05	0	0	0	0	0	0	0	0	0	0	0	0	0	1.76e-05	0	0	0	0	0	0	0	0	0	0	0	0	0	0	Eukaryota	Alveolata	Ciliophora	Ciliophora_X	Ciliophora_XX	Ciliophora_XXX	Mesodinium	Mesodinium_rubrum
OTU_3546	0.000357143	0.000131808	2.1e-05	3.52e-05	0	0	0	0	0	0	0	0	0	0	0	0	0	0	0	0	0	0	0	0	0	0	0	0	0	0	0	0	0	0	Eukaryota	Rhizaria	Cercozoa	Cercozoa_X	Cercozoa_XX	Cercozoa_XXX	Cercozoa_XXXX	Cercozoa_XXXX_sp.
OTU_300	0.000315126	0.000105446	2.1e-05	2.64e-05	0	0	0	0	0	0	0	0	0	0	0	0	0	0	0	0	0	0	0	0	0	0	0	0	0	0	0	0	0	0	Eukaryota	Rhizaria	Cercozoa	Cercozoa_unclassified	Cercozoa_unclassified	Cercozoa_unclassified	Cercozoa_unclassified	Cercozoa_unclassified
OTU_75	0.000609244	7.91e-05	0.000168347	0.000140788	0	0	0	1.14e-05	0	0	0	0	0	0	0	0.000766439	0.000305955	0.000266909	0.000118427	0	0	0	0	0	0	0	0	0	0	0	0	0	0	0	Eukaryota	Stramenopiles	Ochrophyta	Chrysophyceae	Chrysophyceae_X	Chrysophyceae_Clade-F	Chrysophyceae_Clade-F_X	Chrysophyceae_Clade-F_X_sp.
OTU_226	4.2e-05	7.91e-05	4.21e-05	2.64e-05	0.000217315	0.000254741	6.09e-05	0	0	7.06e-05	2.87e-05	0	2.79e-05	0	0	0	0	0	0	0	0	0	0	0	0	0	0	0	0	0	0.000165262	0.00369275	0	0	Eukaryota	Alveolata	Dinoflagellata	Dinophyceae	Dinophyceae_unclassified	Dinophyceae_unclassified	Dinophyceae_unclassified	Dinophyceae_unclassified
OTU_22583	0	0.000184531	0.000168347	8.8e-05	5.43e-05	0	0	0	0	0	1.44e-05	0	0	0	0	0	0	0	0	0	0	0	0	0	0	0	0	0	0	0	0	0	0	0	Eukaryota	Alveolata	Dinoflagellata	Dinophyceae	Dinophyceae_unclassified	Dinophyceae_unclassified	Dinophyceae_unclassified	Dinophyceae_unclassified
OTU_2675	0.000105042	0.000131808	0.000105217	0.000140788	0	0	0	0	0	0	0	0	0	0	0	0.000225423	0.000336551	0.000231321	0.000157903	3.53e-05	0	7.68e-05	0	0	0	0	0	0	0	0	0	0	0	0	Eukaryota	Stramenopiles	Ochrophyta	Chrysophyceae	Chrysophyceae_X	Chrysophyceae_XX	Chrysophyceae_XXX	Chrysophyceae_XXX_sp.
OTU_2462	0.00655462	0	0	2.64e-05	5.43e-05	0	0	3.41e-05	0.00216742	0.00151785	0.00175209	0.00331114	0.00307327	0.00641608	0.00214006	0	0	0	0	1.76e-05	0	0.000276659	0.00111912	0.000353024	0.00121344	0.003777	0.00402947	0	0.000702617	0	6.61e-05	0	0.000460289	0	Eukaryota	Stramenopiles	Ochrophyta	Chrysophyceae	Chrysophyceae_X	Chrysophyceae_Clade-C	Dinobryon	Dinobryon_faculiferum
OTU_1127	0	0	0	0	0	0	0	0	0	0	0	0	0	0	0	0	0	0	1.97e-05	0	0	0	0	0	0	0	2.04e-05	0	3.51e-05	0	0	0	0.000341505	0	Eukaryota	Alveolata	Dinoflagellata	Dinophyceae	Peridiniales	Amphidiniopsidaceae	Islandinium	Islandinium_tricingulatum
OTU_21876	0	0	0	0	0	0	0	0	0	0.000476535	0	0	0	0	0	0	0	0	0	5.29e-05	0	1.54e-05	0	0	0	0	0.000122105	0	3.51e-05	0	0	0	0.000400897	0	Eukaryota	Alveolata	Dinoflagellata	Dinophyceae	Dinophyceae_unclassified	Dinophyceae_unclassified	Dinophyceae_unclassified	Dinophyceae_unclassified
OTU_22840	0	0.000131808	0	5.28e-05	5.43e-05	0.000238819	0	0	0	0	0	0	0	0	0	0	0	0	0	0	0	0	0	0	0	0	0	0	0	0	0	0	0.000118784	1.47e-05	Eukaryota	Alveolata	Dinoflagellata	Dinophyceae	Dinophyceae_unclassified	Dinophyceae_unclassified	Dinophyceae_unclassified	Dinophyceae_unclassified
OTU_21988	0	5.27e-05	0.000210433	7.04e-05	0.00019015	9.55e-05	0	0	0	0	0	0	0	0	0	0	0	0	0	0	0	0	0	0	0	0	0	0	0	0	0	0	0	0	Eukaryota	Alveolata	Dinoflagellata	Dinophyceae	Dinophyceae_unclassified	Dinophyceae_unclassified	Dinophyceae_unclassified	Dinophyceae_unclassified
OTU_1931	0	0.000421785	8.42e-05	8.8e-05	0	0	0	0	0	0	0	0	0	0	3.48e-05	0	0	0	0	0	0	0	0	0	0	0	0	0	0	0	0	0	0	0	Eukaryota	Hacrobia	Hacrobia_unclassified	Hacrobia_unclassified	Hacrobia_unclassified	Hacrobia_unclassified	Hacrobia_unclassified	Hacrobia_unclassified
OTU_351	0	0.00263616	0.00168347	0.00107351	0.000271643	0	0	0	0	0	2.87e-05	0	0	0	5.22e-05	0	0	0	0	0	0	1.54e-05	0.000450377	4.71e-05	4.61e-05	7.29e-05	4.07e-05	0	0.000140523	0	0	0	8.91e-05	0	Eukaryota	Alveolata	Ciliophora	Spirotrichea	Strombidiida	Tontoniidae_A	Tontoniidae_A_X	Tontoniidae_A_X_sp.
OTU_169	0.000189076	0.000131808	2.1e-05	6.16e-05	0	0	0.00136318	3.41e-05	0	0.000864823	0.000588818	0	0	0.000648684	0	0.00572575	0.000611911	3.56e-05	1.97e-05	5.29e-05	0	0	0	0	0	1.46e-05	0	0	0	0	0	0	0	0	Eukaryota	Stramenopiles	Ochrophyta	Chrysophyceae	Chrysophyceae_X	Chrysophyceae_Clade-C	Chrysophyceae_Clade-C_X	Chrysophyceae_Clade-C_X_sp.
OTU_359	8.4e-05	0	0	0	0	0.000382111	0	0	0	0	0	0.000502739	0.00023748	0	0	0	0	0	0	3.53e-05	2.9e-05	7.68e-05	0.000327547	4.71e-05	4.61e-05	0.00156038	0.000101754	0.000249356	7.03e-05	0	0	0.000688479	0.00149965	0.000132704	Eukaryota	Alveolata	Ciliophora	Spirotrichea	Strombidiida	Strombidiida_unclassified	Strombidiida_unclassified	Strombidiida_unclassified
OTU_2700	0	7.91e-05	4.21e-05	3.52e-05	0.000135822	0	0	0	0	0	0	0	0	0.000141531	5.22e-05	0	0	0	0	0	0	0	1.36e-05	0	0	1.46e-05	0	0	0	0	0	0	2.97e-05	0	Eukaryota	Stramenopiles	Ochrophyta	Bacillariophyta	Bacillariophyta_X	Polar-centric-Mediophyceae	Chaetoceros	Chaetoceros_decipiens
OTU_3312	2.1e-05	0.000606316	0.00128364	0.0012055	0.000651944	0.00226082	0	0	0	0	0.00127817	0	0.000768317	0	0	0	0	0.000142351	0	0	0	0	1.36e-05	2.35e-05	1.54e-05	5.83e-05	2.04e-05	0.000415593	0	0	0	0.000516359	0.000415745	0.000176939	Eukaryota	Alveolata	Dinoflagellata	Dinophyceae	Dinophyceae_unclassified	Dinophyceae_unclassified	Dinophyceae_unclassified	Dinophyceae_unclassified
OTU_15759	0	7.91e-05	0.00012626	0.000193584	0.000298807	0.00130554	0	0	0	7.06e-05	0	0	0.000335266	0	0.0030622	0	0	0	0	0	0	0	0	9.41e-05	0	1.46e-05	0	0.00145458	0	0	0	0.000829304	0.000920578	0.0011501	Eukaryota	Alveolata	Dinoflagellata	Dinophyceae	Dinophyceae_unclassified	Dinophyceae_unclassified	Dinophyceae_unclassified	Dinophyceae_unclassified
OTU_23347	2.1e-05	0	4.21e-05	0	0	7.96e-05	0	0	0	0	1.44e-05	0	0	0	0	0	0	0	0	0	0	0	0	0	0	0	0	0	0	0	0	0.000187767	7.42e-05	2.95e-05	Eukaryota	Alveolata	Dinoflagellata	Dinophyceae	Dinophyceae_unclassified	Dinophyceae_unclassified	Dinophyceae_unclassified	Dinophyceae_unclassified
OTU_15713	0.00911765	0.000105446	0.000294607	0.000140788	0.000434629	0.000764222	0	0	0	0	0	0	0.000544807	0	0	0.000225423	0	7.12e-05	0	0	2.9e-05	4.61e-05	0	0.000235349	0	0	8.14e-05	0	0	0	0.0006941	1.56e-05	0.00115815	0	Eukaryota	Alveolata	Dinoflagellata	Dinophyceae	Gymnodiniales	Gymnodiniaceae	Gyrodinium	Gyrodinium_helveticum
OTU_12116	0	0	0	0	0	0	0	0	0	0	0	0	0	0	3.48e-05	0	0	0	0	0	1.45e-05	4.61e-05	0.000150126	2.35e-05	1.54e-05	0.000102081	2.04e-05	0	0	0	0	0	0	0	Eukaryota	Alveolata	Ciliophora	Spirotrichea	Strombidiida	Strombidiidae_K	Strombidium_K	Strombidium_capitatum
OTU_6576	0.000273109	0	8.42e-05	0.000175985	0	0	0	0.000204839	0	0	0	0	0	0	0	2.25e-05	4.59e-05	1.78e-05	0	0	0	0	0	0	0	0	0	0	0	0	0	0	0	0	Eukaryota	Hacrobia	Katablepharidophyta	Katablepharidaceae	Katablepharidales	Katablepharidales_X	Katablepharidales_XX	Katablepharidales_XX_sp.
OTU_1691	0	0	0	0	0	0	0	0	0	0	0	0	0	0	0	0.00105949	0.000214169	1.78e-05	0	0	0	0	0	0	0	0	0	0	0	0	0	0	0	0	Eukaryota	Stramenopiles	Ochrophyta	Chrysophyceae	Chrysophyceae_X	Chrysophyceae_Clade-B2	Chrysosphaerella	Chrysosphaerella_unclassified
OTU_19284	0	0	0	0	0	0.000143292	0	0	4.09e-05	0	0	0	4.19e-05	0.000389211	0.000104393	0.000112712	0	0	0	0	0	0	0	0	0	0	0	0.000124678	0	0	0	0.000125178	7.42e-05	0.000412858	Eukaryota	Stramenopiles	Stramenopiles_X	MAST	MAST-7	MAST-7A	MAST-7A_X	MAST-7A_X_sp.
OTU_788	0.00130252	5.27e-05	0.00037878	0.000545554	0.000977915	0.0121639	0	0	0	0	0.000933492	0	0.00156457	0.00587354	0.0163549	0	0	0	0	0	0.000261339	0.0001537	8.19e-05	0.00367145	4.61e-05	0.000510405	0.00179087	0	3.51e-05	0.020511	0.0117005	0.00974824	0.000861186	0.00281628	Eukaryota	Opisthokonta	Choanoflagellida	Choanoflagellatea	Acanthoecida	Stephanoecidae_Group_D	Stephanoecidae_Group_D_X	Stephanoecidae_Group_D_X_sp.
OTU_856	0	0	0	0	0	0	1.22e-05	0	0	0	0	0	0	0	0	0.000766439	0.000443635	7.12e-05	0	0	0	0	0	0	0	0	0	0	0	0	0	0	0	0	Eukaryota	Stramenopiles	Ochrophyta	Chrysophyceae	Chrysophyceae_X	Chrysophyceae_Clade-G	Chrysophyceae_Clade-G_X	Chrysophyceae_Clade-G_X_sp.
OTU_6497	0	0	0	8.8e-05	5.43e-05	0.000525402	0	1.14e-05	0.000845159	0.000988369	0.00130689	0.00442064	0.00353426	0.0101667	0.00530666	0	0	0	0	0	2.9e-05	1.54e-05	0.000163773	0.000164745	1.54e-05	0.000831231	0.000447719	0.00166237	3.51e-05	0	0.00013221	0.00183073	0.000237568	0.000914185	Eukaryota	Opisthokonta	Choanoflagellida	Choanoflagellatea	Acanthoecida	Stephanoecidae_Group_H	Stephanoecidae_Group_H_unclassified	Stephanoecidae_Group_H_unclassified
OTU_1006	0	0	0	0	0	0	0	0	0	0	0	0	0	0	0	0	0	0	0	0	0	0	1.36e-05	0	0.00013824	0.00014583	0	0	0.000105393	0	0	0.00079801	1.48e-05	0.000235919	Eukaryota	Alveolata	Ciliophora	CONThreeP	CONThreeP_X	Urotrichidae	Urotricha	Urotricha_sp.
OTU_1607	0	0	0	0	0	0	0	0	0	0	0	0	0.000824195	0	0	0	0	0	0	1.76e-05	0	0	0	0	0	0	0	0	3.51e-05	0	0	0	0	0	Eukaryota	Alveolata	Ciliophora	Spirotrichea	Spirotrichea_unclassified	Spirotrichea_unclassified	Spirotrichea_unclassified	Spirotrichea_unclassified
OTU_2550	0	0	0	0	0	0	0	0	0.000313527	0.000776576	0.00020106	0	0	0.000129737	0.00532405	0	0	0	0	3.53e-05	7.26e-05	0.000537948	0.00199258	0	0.000384001	0.00166246	0.00549473	0.000374034	0.000702617	0	0	0.00045377	0.000237568	2.95e-05	Eukaryota	Alveolata	Ciliophora	Spirotrichea	Strombidiida	Strombidiidae_K	Strombidium_K	Strombidium_capitatum
OTU_4315	0	5.27e-05	0.00018939	0.000193584	5.43e-05	0.000382111	0	0	0	0	0.000545734	0	0.000433052	0	0	0	0	0	0	0	0	0	0	0	0	0	0	0.000166237	0	0	0	0.000344239	0.000207872	5.9e-05	Eukaryota	Alveolata	Dinoflagellata	Dinophyceae	Dinophyceae_unclassified	Dinophyceae_unclassified	Dinophyceae_unclassified	Dinophyceae_unclassified
OTU_1775	0	5.27e-05	0	0	0	0	0	0	0	0	0	0	0	0	0	0	0	0	0	0	0	0	0	0	0	0	0	0	0	0	0	0	0	0.00157771	Eukaryota	Hacrobia	Haptophyta	Prymnesiophyceae	Phaeocystales	Phaeocystaceae	Phaeocystis	Phaeocystis_sp.
OTU_6882	0	0.000289977	0.00119947	0.000888725	0.000407465	0.00012737	0	0	0	0.000158845	0	0	0.000726409	0	0	0	0	0	0	0	0	1.54e-05	2.73e-05	0	0	0	2.04e-05	0	0	0	0.000330524	7.82e-05	0.000207872	0	Eukaryota	Alveolata	Dinoflagellata	Dinophyceae	Gymnodiniales	Gymnodiniaceae	Gymnodiniaceae_unclassified	Gymnodiniaceae_unclassified
OTU_3892	0	0.000184531	2.1e-05	1.76e-05	0.00019015	7.96e-05	0	0	0	0	0	0	0.010058	1.18e-05	0	0	0	0	0	0	0	0	0	0	0	0	2.04e-05	0	0	0	0	1.56e-05	0.000178176	0	Eukaryota	Archaeplastida	Chlorophyta	Mamiellophyceae	Mamiellales	Mamiellaceae	Micromonas	Micromonas_unclassified
OTU_720	0	0	0	0	0	0	0	0	0.00220832	0	0	0	0	0.00106148	0	0	0	0	0	0	0	0	1.36e-05	0	0	4.37e-05	0.000203508	0	0	0	0	0	0	0.000353878	Eukaryota	Opisthokonta	Choanoflagellida	Choanoflagellatea	Acanthoecida	Acanthoecida_unclassified	Acanthoecida_unclassified	Acanthoecida_unclassified
OTU_2046	0	0	0	0	0	0.00359821	0	0	0.000381685	0	0	0	0.000866103	0	0	0	0	0	0	1.76e-05	0	1.54e-05	8.19e-05	0.00105907	4.61e-05	0.00485614	0.000427368	0.00058183	7.03e-05	0.00212926	0.000661048	0.00414652	0.00207872	0.00392215	Eukaryota	Alveolata	Ciliophora	Spirotrichea	Strombidiida	Strombidiida_unclassified	Strombidiida_unclassified	Strombidiida_unclassified
OTU_8906	0.000420168	2.64e-05	2.1e-05	1.76e-05	2.72e-05	0.000764222	1.22e-05	0	0.000149948	0	0.000244144	0	0	0	0.000173989	0	0	0	0	1.76e-05	0	1.54e-05	0.000109182	0	9.22e-05	0.00029166	0.000142456	0	0	0	0.000165262	0.000250356	0.000727553	8.85e-05	Eukaryota	Alveolata	Ciliophora	Spirotrichea	Strombidiida	Strombidiidae_M	Strombidiidae_M_unclassified	Strombidiidae_M_unclassified
OTU_2060	0	5.27e-05	2.1e-05	0	0	3.18e-05	0	0	4.09e-05	0	0	0	0	0	1.74e-05	0	0	0	0	0	1.45e-05	6.15e-05	2.73e-05	0	1.54e-05	0	4.07e-05	0	0	0	0	0	1.48e-05	2.95e-05	Eukaryota	Hacrobia	Cryptophyta	Cryptophyceae	Cryptophyceae_X	Cryptomonadales	Teleaulax	Teleaulax_gracilis
OTU_7039	6.3e-05	5.27e-05	8.42e-05	0.000140788	0	0	0	1.14e-05	0	0	1.44e-05	0	0	0	0	0	0	0	0	0	0	0	0	0	0	0	0	0	0	0	0	0	0	0	Eukaryota	Hacrobia	Katablepharidophyta	Katablepharidaceae	Katablepharidales	Katablepharidales_X	Katablepharidales_XX	Katablepharidales_XX_sp.
OTU_1029	0.010063	0.000869932	0.00454536	0.0070746	5.43e-05	0	0	5.69e-05	0	0	0	0	0	0	0	0.000225423	0.000443635	0.0029182	0.000710564	0.000105865	0	0	0	0	0	0	0	0	0	0	0	0	0	0	Eukaryota	Hacrobia	Centroheliozoa	Centroheliozoa_X	Pterocystida	Pterocystida_unclassified	Pterocystida_unclassified	Pterocystida_unclassified
OTU_12261	0	0	0	0	0	0	0	0	0.000490737	0.00121781	0.000574457	0	0	0.000235885	0.0102479	0	0	0	0	0	8.71e-05	0.00118349	0.00328912	4.71e-05	0.000721922	0.00307701	0.0111116	0.000374034	0.00119445	0	0	0.000970129	0.000683009	7.37e-05	Eukaryota	Alveolata	Ciliophora	Spirotrichea	Strombidiida	Strombidiidae_K	Strombidium_K	Strombidium_capitatum
OTU_1345	0	0	0	0	0	0.00206977	0	0	0	0	0	0	0	0	0	0	0	0	0	0	0	0	0	0	0	0	0	0	0	0	0	0	0	0	Eukaryota	Hacrobia	Picozoa	Picozoa_X	Picozoa_XX	Picozoa_XXX	Picozoa_XXXX	Picozoa_XXXX_sp.
OTU_1671	0	0	0	0	0	0	0	0	0	0	0	0	0	0	0	4.51e-05	0.00041304	0	0	0	0	0	0	0	0	0	0	0	0	0	0	0	0	0	Eukaryota	Alveolata	Ciliophora	Colpodea	Colpodea_X	Platyophryida	Platyophryida_unclassified	Platyophryida_unclassified
OTU_2182	0	2.64e-05	2.1e-05	8.8e-06	2.72e-05	3.18e-05	0	0	1.36e-05	0	0	0	1.4e-05	0	0.000365376	0	0	0	0	1.76e-05	0	3.07e-05	0	0	0	0	2.04e-05	0	0	0	0	3.13e-05	2.97e-05	5.9e-05	Eukaryota	Hacrobia	Cryptophyta	Cryptophyceae	Cryptophyceae_X	Cryptomonadales	Teleaulax	Teleaulax_gracilis
OTU_4772	0	0	0	0	0	0	0	0	0	0	0	0	0	3.54e-05	0	0	0	0	0.000572399	1.76e-05	2.9e-05	0	0	0	0	2.92e-05	0	0	0	0	0	6.26e-05	0	8.85e-05	Eukaryota	Rhizaria	Cercozoa	Filosa-Thecofilosea	Ventricleftida	CCW10-lineage	CCW10-lineage_X	CCW10-lineage_X_sp.
OTU_14532	0	0	0	0	0	0	0	2.28e-05	0.00348969	0.0048536	0.00326004	0.00273906	0	0.000766627	0	0.000428304	0	1.78e-05	1.97e-05	0.000264662	0.000101632	0.00146015	0.00166503	0.000588374	0.0013824	0.000379158	0.00341894	4.16e-05	0.00326717	0	0	0.000594595	0.000475137	0.000117959	Eukaryota	Stramenopiles	Ochrophyta	Chrysophyceae	Chrysophyceae_X	Chrysophyceae_Clade-C	Chrysophyceae_Clade-C_X	Chrysophyceae_Clade-C_X_sp.
OTU_3899	2.1e-05	0	2.1e-05	0	5.43e-05	3.18e-05	0	0	0	0	0	0	1.4e-05	0	0	0	0	0	0	0	0	0	0	0	0	0	0.000203508	0	0	0	0	0	0.000801794	0	Eukaryota	Alveolata	Dinoflagellata	Dinophyceae	Dinophyceae_unclassified	Dinophyceae_unclassified	Dinophyceae_unclassified	Dinophyceae_unclassified
OTU_5068	0	7.91e-05	0.000231477	0.000184784	0.000271643	7.96e-05	0	0	0	0	0	0	0	0	0	0	0	0	0	0	0	0	0	0	0	0	0	0	0	0	0	1.56e-05	0	1.47e-05	Eukaryota	Alveolata	Dinoflagellata	Dinophyceae	Gymnodiniales	Gymnodiniales_unclassified	Gymnodiniales_unclassified	Gymnodiniales_unclassified
OTU_716	0	0.000711763	0.000273563	0.00023758	0.000325972	6.37e-05	0	0	0	0	0.00113455	0	0.000530837	0.000224091	0	0	0	0	0	0	0	4.61e-05	1.36e-05	0	4.61e-05	1.46e-05	0.000345964	0.00307539	0.000386439	0	0	0	4.45e-05	0.000132704	Eukaryota	Rhizaria	Cercozoa	Filosa-Thecofilosea	Cryomonadida	Protaspa-lineage	Protaspa-lineage_X	Protaspa-lineage_X_sp.
OTU_818	2.1e-05	0.000158169	0.000105217	6.16e-05	2.72e-05	0	0	0	0	0	0	0	0	4.72e-05	8.7e-05	0	0	0	0	0	0	0	0	0	0	0	2.04e-05	0	0	0	0	9.39e-05	0.00014848	7.37e-05	Eukaryota	Hacrobia	Telonemia	Telonemia_X	Telonemia_XX	Telonemia-Group-2	Telonema-Group-2	Telonema_antarcticum
OTU_13385	0	0	0	0	0	0.00012737	0	0	1.36e-05	0	0	0	0	0	0.000104393	2.25e-05	0	0	0	0.000441104	0.000116151	0.000230549	0.000764276	4.71e-05	0.000337921	0.000218745	2.04e-05	8.31e-05	0.000913402	0	0	3.13e-05	0.000133632	0.000103214	Eukaryota	Alveolata	Ciliophora	Spirotrichea	Strombidiida_B	Strombidiida_B_X	Strombidiida_B_XX	Strombidiida_B_XX_sp.
OTU_4530	0	2.64e-05	4.21e-05	0.000131989	8.15e-05	0.00012737	0	0	0	0	0	0	0	0	0	0	0	0	0	1.76e-05	0	0	0	0	0	0	0	0	0	0	0	0	0	0	Eukaryota	Alveolata	Alveolata_unclassified	Alveolata_unclassified	Alveolata_unclassified	Alveolata_unclassified	Alveolata_unclassified	Alveolata_unclassified
OTU_624	0	0	0	0	0	0	0	5.69e-05	0	0	0	0	0	0	0	0.000608643	0.000764889	0.000106763	3.95e-05	0	0	0	0	0	0	0	0	0	0	0	0	0	0	0	Eukaryota	Stramenopiles	Ochrophyta	Chrysophyceae	Chrysophyceae_X	Chrysophyceae_X_unclassified	Chrysophyceae_X_unclassified	Chrysophyceae_X_unclassified
OTU_3891	4.2e-05	0.000105446	0	6.16e-05	5.43e-05	6.37e-05	0	0	0	0	1.44e-05	0	1.4e-05	0	1.74e-05	0	0	0	0	0	0	0	0	0	0	0	0	0	0	0	0	0	1.48e-05	0	Eukaryota	Alveolata	Dinoflagellata	Dinophyceae	Dinophyceae_unclassified	Dinophyceae_unclassified	Dinophyceae_unclassified	Dinophyceae_unclassified
OTU_1807	0	2.64e-05	0.00012626	3.52e-05	2.72e-05	4.78e-05	0	2.28e-05	9.54e-05	0	0	0	0	0	8.7e-05	0	0	0	0.000197379	0.000988073	0.00110343	0	0.000655093	0	7.68e-05	0.000189579	0	0	7.03e-05	0	0	0	0	2.95e-05	Eukaryota	Alveolata	Ciliophora	Litostomatea	Haptoria_4	Didiniidae	Didiniidae_X	Didiniidae_X_sp.
OTU_3426	0	0.000316339	0.000273563	0.000105591	0.000298807	4.78e-05	0	0	0	0	0	0	0	0	1.74e-05	0	0	0	0	0	0	0	0	0	0	0	0	0	0	0	0	1.56e-05	0	0	Eukaryota	Alveolata	Dinoflagellata	Dinophyceae	Dinophyceae_unclassified	Dinophyceae_unclassified	Dinophyceae_unclassified	Dinophyceae_unclassified
OTU_6447	0	0.000184531	0.000168347	7.04e-05	0.000651944	4.78e-05	0	0	0	0	0	0	1.4e-05	0	0	0	0	0	0	0	0	0	0	0	0	0	0	0	0	0	0	0	0.000267265	1.47e-05	Eukaryota	Alveolata	Dinoflagellata	Dinophyceae	Dinophyceae_unclassified	Dinophyceae_unclassified	Dinophyceae_unclassified	Dinophyceae_unclassified
OTU_664	0	5.27e-05	0.000420867	0.000448762	0.000760601	0.000143292	0	0	0	0	0	0.00121351	0	0	0	0	0	0	0	0	0	0	0	0	0	1.46e-05	2.04e-05	0	0	0	0	0.00114225	0	0	Eukaryota	Hacrobia	Centroheliozoa	Centroheliozoa_X	Pterocystida	Pterocystida_X	Pterocystida_XX	Pterocystida_XX_sp.
OTU_175	6.3e-05	0	0.000105217	0.000272777	0	0	0.00238556	0.00118351	0	0	0	0	0	0	0	0.00405762	0.00160627	3.56e-05	5.92e-05	0.000811631	0.00062431	0.000215179	0.000136478	0	0.000245761	0	6.11e-05	0	0.000351309	0	0	0	0	0	Eukaryota	Alveolata	Ciliophora	CONThreeP	CONThreeP_X	CONThreeP_XX	Askenasia	Askenasia_sp.
OTU_884	0	0	0	1.76e-05	0	1.59e-05	0	3.41e-05	0	0.00614201	0.00199624	0	0.0018719	0.0022527	0	0	0	0	3.95e-05	0.00134096	0.000493641	0.00650149	0.00226553	0.00522476	0.000860162	0.00014583	0.000305263	0.00349098	0.000491832	0	0	0	1.48e-05	0.000457092	Eukaryota	Rhizaria	Cercozoa	Cercozoa_X	Cercozoa_XX	Cercozoa_XXX	Cercozoa_XXXX	Cercozoa_XXXX_sp.
OTU_6237	0	0.000448147	0.00119947	0.00205023	0.00673675	0.00192648	0	0	0	0.00135901	0.00205368	0.00443797	0.00106167	0.00549613	0	0	0	0	0	0	0	6.15e-05	4.09e-05	0.000588374	6.14e-05	0.000524988	0.00126175	0.00419749	0	0	0.00842836	0.00151778	0.00206388	0.00685639	Eukaryota	Opisthokonta	Choanoflagellida	Choanoflagellatea	Acanthoecida	Stephanoecidae_Group_D	Stephanoecidae_Group_D_X	Stephanoecidae_Group_D_X_sp.
OTU_1653	0	0	0	0	0	0.000143292	0	0	0	0.00363579	0.00103402	0	0.00220717	0.00125019	0	0	0	0	0	0	0	0	4.09e-05	0	0	4.37e-05	0.000183158	0	0	0	0	0	0.000267265	0	Eukaryota	Hacrobia	Telonemia	Telonemia_X	Telonemia_XX	Telonemia-Group-2	Telonemia-Group-2_X	Telonemia-Group-2_X_sp.
OTU_5647	0	0	0	0	0	0	0	0	0	0	0	0	0	0	0	0	0	0	0	0	0	0	0.000109182	0	0	0	0.000264561	0	0.000210785	0	0	0	0	0	Eukaryota	Stramenopiles	Ochrophyta	Pelagophyceae	Pelagophyceae_unclassified	Pelagophyceae_unclassified	Pelagophyceae_unclassified	Pelagophyceae_unclassified
OTU_12753	0	2.64e-05	0	3.52e-05	0.000135822	3.18e-05	0	0	0	0.000864823	0.000574457	3.47e-05	0.00290564	0.000648684	0.000243584	0	0	0	0	0	0	7.68e-05	0	0.00115321	3.07e-05	1.46e-05	6.11e-05	0.000166237	3.51e-05	0.000431244	0.00360271	0.00153343	0.000267265	2.95e-05	Eukaryota	Archaeplastida	Chlorophyta	Mamiellophyceae	Mamiellales	Mamiellaceae	Micromonas	Micromonas_unclassified
OTU_21527	0	0	0	0	5.43e-05	0.00170358	0	0	0	0.000158845	0	0	0	0.000271268	0	0	0	0	0	0	0	0	2.73e-05	0	1.54e-05	4.37e-05	4.07e-05	0.000498712	0	0	0	0.000641537	0.00117299	5.9e-05	Eukaryota	Hacrobia	Haptophyta	Prymnesiophyceae	Phaeocystales	Phaeocystaceae	Phaeocystis	Phaeocystis_pouchetii
OTU_308	0.00184874	0.0003427	0.00044191	0.000545554	0	0	0	0	0	0	0	0	0	0	0	0	7.65e-05	0	0	0	0	0	0	0	0	0	0	0	0	0	0	0	0	0	Eukaryota	Rhizaria	Cercozoa	Novel-clade-10-12	Novel-clade-10	Novel-clade-10_X	Novel-clade-10_XX	Novel-clade-10_XX_sp.
OTU_2260	0	0	0	0	0	0	0	0	0	0	0	0	0	0	0	6.76e-05	0	0	0.00116453	0.000458748	0.000116151	0.000522578	6.82e-05	0	1.54e-05	4.37e-05	0	0	0	0	0	0	0	0	Eukaryota	Stramenopiles	Ochrophyta	Bacillariophyta	Bacillariophyta_X	Raphid-pennate	Raphid-pennate_unclassified	Raphid-pennate_unclassified
OTU_22924	8.4e-05	0	0	8.8e-06	0	0.000111449	0	0	0	0	0	0	0	0	0	0	0	0	0	0	0	0	0	2.35e-05	0	0	0.000142456	0	0	0	0	3.13e-05	0.00124723	0	Eukaryota	Alveolata	Dinoflagellata	Dinophyceae	Gymnodiniales	Gymnodiniaceae	Gyrodinium	Gyrodinium_helveticum
OTU_1380	0	0.000210893	0.000210433	0.000879925	0.000679108	0.000143292	0	0	0	0.0118604	0.00561532	0.0102455	0.00421876	0.00654581	0.00875163	0	0	0	0	1.76e-05	0	6.15e-05	0.000382138	0.000211815	0.000276481	0.000379158	8.14e-05	0	0.000491832	0	0	0	0.000697857	0.000707756	Eukaryota	Stramenopiles	Ochrophyta	Bacillariophyta	Bacillariophyta_X	Polar-centric-Mediophyceae	Chaetoceros	Chaetoceros_unclassified
OTU_17891	0	0	0	0	0	1.59e-05	0	0	0	0	0	0	0	0	0	0	0	0	0	0	1.45e-05	6.15e-05	2.73e-05	0	9.22e-05	0	6.11e-05	0	0.000140523	0	0	0	0.000133632	0	Eukaryota	Stramenopiles	Ochrophyta	Chrysophyceae	Chrysophyceae_X	Chrysophyceae_Clade-H	Chrysophyceae_Clade-H_X	Chrysophyceae_Clade-H_X_sp.
OTU_5346	0	0.000527232	0.00050504	0.000959119	0.000950751	0.00477639	0	0	0	0	0	0.00703835	0.00069847	9.44e-05	0	0	0	0	7.9e-05	0	0	0	0	0	0	1.46e-05	0	0.00253512	0	0	0	0.00231579	8.91e-05	0.000294898	Eukaryota	Alveolata	Dinoflagellata	Dinophyceae	Dinophyceae_unclassified	Dinophyceae_unclassified	Dinophyceae_unclassified	Dinophyceae_unclassified
OTU_520	0	0.000158169	4.21e-05	8.8e-06	2.72e-05	0.00485599	0	0	0	0	0	0	0	0	0	0	0	1.78e-05	0	0	0	0	1.36e-05	0	0	0	0	0	0	0	0	0	0	4.42e-05	Eukaryota	Stramenopiles	Ochrophyta	Bacillariophyta	Bacillariophyta_X	Polar-centric-Mediophyceae	Thalassiosira	Thalassiosira_unclassified
OTU_3335	0	0.000105446	0.000105217	2.64e-05	0.000108657	0.00036619	0	0	0	0.000458886	1.44e-05	0	0	0.000106148	0	0	0	0	3.95e-05	0	0	0	0	7.06e-05	0	0	2.04e-05	0	0	0.0269527	0	0.000203414	0.000118784	0	Eukaryota	Hacrobia	Haptophyta	Prymnesiophyceae	Prymnesiales	Chrysochromulinaceae	Chrysochromulina	Chrysochromulina_unclassified
OTU_611	0.000336134	0.000105446	6.31e-05	7.92e-05	0	0	0.000109541	0	0	0	0	0	0	0	0	0.000405762	4.59e-05	1.78e-05	3.95e-05	0	0	0	0	0	0	0	0	0	0	0	0	0	0	0	Eukaryota	Stramenopiles	Ochrophyta	Chrysophyceae	Chrysophyceae_X	Chrysophyceae_Clade-F	Chrysophyceae_Clade-F_X	Chrysophyceae_Clade-F_X_sp.
OTU_1716	2.1e-05	0	4.21e-05	6.16e-05	0	0	0.000231253	0	0	0	0	0	0	0	0	0	1.53e-05	0	1.97e-05	0	0	0	0	0	0	0	0	0	0	0	0	0	0	0	Eukaryota	Stramenopiles	Ochrophyta	Bacillariophyta	Bacillariophyta_X	Araphid-pennate	Fragilaria	Fragilaria_unclassified
OTU_666	0.00119748	0.000369062	0.000420867	0.000281576	0	0	0	0	0	0	0	0	0	0	0	0.000135254	0.000397742	0	0	0	0	0	0	0	0	0	0	0	0	0	0	0	0	0	Eukaryota	Rhizaria	Cercozoa	Filosa	Filosa_X	Filosa_XX	Filosa_XXX	Filosa_XXX_sp.
OTU_4033	0	0.000316339	0.000210433	0.000184784	0.00019015	0	0	0	0	0	5.74e-05	0	0	0	0	0	0	0	0	1.76e-05	0	0	0.000177421	0	0	2.92e-05	0	0	0.000140523	0	0	0	2.97e-05	0	Eukaryota	Alveolata	Ciliophora	Spirotrichea	Strombidiida	Tontoniidae_A	Tontoniidae_A_X	Tontoniidae_A_X_sp.
OTU_1392	0.000315126	0	2.1e-05	3.52e-05	5.43e-05	0.000525402	0	0	0	0	0	0	1.4e-05	0	0	0	0	0	0	0	0	0	0	0	0	0	0.000183158	0	0	0	3.31e-05	0	0.000252417	1.47e-05	Eukaryota	Alveolata	Dinoflagellata	Dinophyceae	Gymnodiniales	Gymnodiniaceae	Gyrodinium	Gyrodinium_helveticum
OTU_1258	0	7.91e-05	4.21e-05	2.64e-05	0	0	0	0	0	0	0	0	0	0	0.000104393	0	0	0	0	0.00181735	1.45e-05	0.000707018	0.00268861	0.00018828	0.000783362	0.000816648	2.04e-05	0	0.00129984	0	0	3.13e-05	0.00014848	0.000147449	Eukaryota	Alveolata	Ciliophora	Spirotrichea	Strombidiida	Strombidiida_unclassified	Strombidiida_unclassified	Strombidiida_unclassified
OTU_4719	0	7.91e-05	0.000168347	8.8e-05	2.72e-05	6.37e-05	0	0	0	0	0	0	0	0	0	0	0	0	0	0	0	0	0	0	0	0	0	0	0	0	0	0	0	0	Eukaryota	Alveolata	Dinoflagellata	Dinophyceae	Gymnodiniales	Gymnodiniaceae	Gymnodiniaceae_unclassified	Gymnodiniaceae_unclassified
OTU_935	0	0.000289977	0.000610257	0.00100311	0.00220031	0	0	0	0	0	0.00203932	0	0	0.000766627	0	0	0	0	0	0	0	0	0	0	0	1.46e-05	0	0	3.51e-05	0	0	0	0	1.47e-05	Eukaryota	Stramenopiles	Ochrophyta	Bacillariophyta	Bacillariophyta_X	Polar-centric-Mediophyceae	Polar-centric-Mediophyceae_X	Polar-centric-Mediophyceae_X_sp.
OTU_13448	0.00012605	0	0	0	0	0	3.65e-05	6.83e-05	1.36e-05	0	0	0	0	0	0	0.000405762	0.00110144	0.00072955	0.000631612	1.76e-05	0	0	0	0	0	0	0	0	0	0	0	0	0	0	Eukaryota	Hacrobia	Cryptophyta	Cryptophyceae	Cryptophyceae_X	Cryptophyceae_X_unclassified	Cryptophyceae_X_unclassified	Cryptophyceae_X_unclassified
OTU_1233	0.00012605	2.64e-05	2.1e-05	0.00174225	0	0	0	9.1e-05	0	0	0	0	0	0	0	0	0	0	0	0	0	0	0	0	0	0	0	0	0	0	0	0	0	0	Eukaryota	Alveolata	Ciliophora	Oligohymenophorea	Peritrichia_2	Sessilida	Sessilida_unclassified	Sessilida_unclassified
OTU_4645	0.000672269	0.00358517	0.00528188	0.0047692	0.00336837	0.000764222	0	0	0	1.76e-05	1.44e-05	3.47e-05	6.98e-05	1.18e-05	1.74e-05	2.25e-05	0	1.78e-05	0	0	0	1.54e-05	0	4.71e-05	0	0	4.07e-05	4.16e-05	0	0	3.31e-05	9.39e-05	0.000252417	5.9e-05	Eukaryota	Alveolata	Dinoflagellata	Dinophyceae	Dinophyceae_unclassified	Dinophyceae_unclassified	Dinophyceae_unclassified	Dinophyceae_unclassified
OTU_2877	0.000630252	0.000237254	0.000336693	0.00047516	0	0	0	2.28e-05	0	0	0	0	0	0	0	0	0	0.000124557	5.92e-05	0	0	0	0	0	0	0	0	0	0	0	0	0	0	0	Eukaryota	Rhizaria	Cercozoa	Filosa-Imbricatea	Filosa-Imbricatea_X	Novel-clade-2	Novel-clade-2_X	Novel-clade-2_X_sp.
OTU_2432	0	0.000764486	0.00031565	0.000175985	0.000298807	1.59e-05	0	0	0	0	1.44e-05	0	0	0	0	0	0	0	0	0	0	0	0	0	0	0	0	0	0	0	0	1.56e-05	0	0	Eukaryota	Alveolata	Dinoflagellata	Dinophyceae	Dinophyceae_unclassified	Dinophyceae_unclassified	Dinophyceae_unclassified	Dinophyceae_unclassified
OTU_2226	0	0	0	0	0	0	0	0	0	0	0	0	0	0	0	0	3.06e-05	8.9e-05	0.00027633	0.000335239	0.000929206	0.000245919	4.09e-05	0	0	0	0	0	0	0	0	0	0	0	Eukaryota	Stramenopiles	Ochrophyta	Bacillariophyta	Bacillariophyta_X	Polar-centric-Mediophyceae	Thalassiosira	Thalassiosira_guillardii
OTU_4782	0.00128151	0	0.00128364	0.00250779	0	0	0.000206911	6.83e-05	0	0	0	0	0	0	0	0.000225423	0.00013768	8.9e-05	0	0	0	3.07e-05	0	0	0	0	0	0	0	0	0	0	0	0	Eukaryota	Hacrobia	Katablepharidophyta	Katablepharidaceae	Katablepharidales	Katablepharidales_X	Katablepharidales_XX	Katablepharidales_XX_sp.
OTU_3925	0.000168067	2.64e-05	4.21e-05	1.76e-05	0.000162986	0.0012737	0	0	0	0	1.44e-05	0	0	0	0	0	0	0	0	0	0	0	0	0	0	0	2.04e-05	0	0	0	0	0	8.91e-05	0	Eukaryota	Alveolata	Ciliophora	Spirotrichea	Strombidiida	Strombidiidae_M	Strombidiidae_M_unclassified	Strombidiidae_M_unclassified
OTU_19303	0	0.000289977	6.31e-05	0.000105591	2.72e-05	3.18e-05	0	0	0	0	0	0	0	0	0	0	0	0	0	0	0	0	0	0	0	0	0	0	0	0	0	0	0	0	Eukaryota	Alveolata	Dinoflagellata	Dinophyceae	Dinophyceae_unclassified	Dinophyceae_unclassified	Dinophyceae_unclassified	Dinophyceae_unclassified
OTU_4177	0	0.000131808	2.1e-05	7.04e-05	0.00019015	0	0	0	0	0	0	0	0	0.000235885	1.74e-05	0	0	0	0	0	0	3.07e-05	1.36e-05	0	0	0	0	0	0	0	0	0	0	0	Eukaryota	Stramenopiles	Ochrophyta	Bacillariophyta	Bacillariophyta_X	Polar-centric-Mediophyceae	Chaetoceros	Chaetoceros_unclassified
OTU_23281	0	5.27e-05	8.42e-05	0.000184784	0.0011409	0.000589088	0	0	0	0	0	0	0.000810226	0	0	0	0	0	0	0	0	0	0	0	0	0	0	0	0	0	0	0	0	0	Eukaryota	Alveolata	Dinoflagellata	Dinophyceae	Gymnodiniales	Gymnodiniaceae	Gyrodinium	Gyrodinium_heterogrammum
OTU_11264	0	0	0	0	0	0	0	0	0	0	0	0	0	0	0	0	0	0	0	0	0	3.07e-05	0.000750628	0	0	4.37e-05	0	0	0	0	0	0	0	0	Eukaryota	Alveolata	Ciliophora	CONTH_8	CONTH_8_X	CONTH_8_XX	CONTH_8_XXX	CONTH_8_XXX_sp.
OTU_23171	0	0	2.1e-05	0	0	7.96e-05	0	0	0	0	1.44e-05	0	0.000209541	0	0	0	0	0	0	0	0	0	0	0	0	0	0	0	0	0	0	0	0	4.42e-05	Eukaryota	Alveolata	Dinoflagellata	Dinophyceae	Dinophyceae_unclassified	Dinophyceae_unclassified	Dinophyceae_unclassified	Dinophyceae_unclassified
OTU_1766	0	0	0	8.8e-06	0	0.000222898	0	0	0	0	0	0	0	0	0	0	0	0	0	0	0	0	0	0	0	0	0	0	0	0	0	3.13e-05	2.97e-05	0.000103214	Eukaryota	Alveolata	Dinoflagellata	Dinophyceae	Dinophyceae_unclassified	Dinophyceae_unclassified	Dinophyceae_unclassified	Dinophyceae_unclassified
OTU_479	0	0	0	0	0	0.000907513	0	0	0	0	0	0	0	0	0	0	0	0	0	0	0	0	0	0	0	0	0	0	0	0	0	0	0	0	Eukaryota	Hacrobia	Haptophyta	Prymnesiophyceae	Prymnesiales	Chrysochromulinaceae	Chrysochromulina	Chrysochromulina_sp.
OTU_465	0	0	2.1e-05	2.64e-05	0.000108657	0	0	0	0	0	0	0	0	0	0	0	0	0	0	0	0	1.54e-05	0	0	0	0.000102081	6.11e-05	0	0	0	0	0	0.000341505	0.000545562	Eukaryota	Rhizaria	Cercozoa	Filosa-Thecofilosea	Cryomonadida	Cryothecomonas-lineage	Cryothecomonas-lineage_unclassified	Cryothecomonas-lineage_unclassified
OTU_920	0	0.000263616	0.000273563	9.68e-05	0.00165702	1.59e-05	0	0	0	0	0	0	0	0.000235885	0	0	0	0	0	3.53e-05	8.71e-05	7.68e-05	0	0	0	2.92e-05	0	0	0	0	0	0	0.000638465	0	Eukaryota	Archaeplastida	Chlorophyta	Mamiellophyceae	Mamiellales	Bathycoccaceae	Bathycoccus	Bathycoccus_prasinos
OTU_22514	0.000483193	0	0	0	2.72e-05	3.18e-05	0	0	0	0	0	0	0.000181602	0	0	0	0	0	0	0	0	0	0	0	0	0	0	0	0	0	0	0	1.48e-05	0	Eukaryota	Alveolata	Dinoflagellata	Dinophyceae	Dinophyceae_unclassified	Dinophyceae_unclassified	Dinophyceae_unclassified	Dinophyceae_unclassified
OTU_3155	0	5.27e-05	0.000210433	2.64e-05	0.000217315	0.000175134	0	0	0	0	0	0	0	0	0	0	0	0	0	0	0	0	0	0	0	0	0	0	0	0	0	0.000250356	0.000386049	0	Eukaryota	Alveolata	Dinoflagellata	Dinophyceae	Dinophyceae_unclassified	Dinophyceae_unclassified	Dinophyceae_unclassified	Dinophyceae_unclassified
OTU_8161	0	0.000158169	0.000168347	7.92e-05	8.15e-05	0.000175134	0	0	0	0	0	0	0	0	0	0	0	0	0	0	4.36e-05	0	0	0	0	0	0	0	0	0	0	0	5.94e-05	0	Eukaryota	Alveolata	Dinoflagellata	Dinophyceae	Dinophyceae_unclassified	Dinophyceae_unclassified	Dinophyceae_unclassified	Dinophyceae_unclassified
OTU_258	0	0.000184531	0.000294607	0.000272777	0.00211882	0.000254741	0	0	0	0	0	0	0	0.000141531	0	0	0	0	0	1.76e-05	8.71e-05	7.68e-05	1.36e-05	0	0	1.46e-05	0	0	0	0	0	0	0.000653313	0	Eukaryota	Archaeplastida	Chlorophyta	Mamiellophyceae	Mamiellales	Bathycoccaceae	Bathycoccus	Bathycoccus_prasinos
OTU_4713	0	0	0	0	0	0	0	4.55e-05	0	0	0	0	0	0	0	0	0	0.000302496	0.000177641	0	0	0	1.36e-05	0	0	0	0	0	0	0	0	0	0	0	Eukaryota	Rhizaria	Cercozoa	Filosa-Imbricatea	Filosa-Imbricatea_X	Novel-clade-2	Novel-clade-2_X	Novel-clade-2_X_sp.
OTU_259	0.00222689	0.000263616	0.000483997	0.000835929	0	0	4.87e-05	0	0	0	0	0	0	0	0	0	0.000168275	0	0	0	0	0	0	0	0	0	0	0	0	0	0	0	0	0	Eukaryota	Rhizaria	Cercozoa	Novel-clade-10-12	Novel-clade-10	Novel-clade-10_X	Novel-clade-10_XX	Novel-clade-10_XX_sp.
OTU_14423	0	7.91e-05	2.1e-05	2.64e-05	0	1.59e-05	0	0	0	0	1.44e-05	3.47e-05	0	4.72e-05	0	0	0	0	0	0	0	0	2.73e-05	4.71e-05	0	2.92e-05	0	0	3.51e-05	0	0	0	0	0	Eukaryota	Rhizaria	Cercozoa	Filosa-Thecofilosea	Cryomonadida	Cryothecomonas-lineage	Cryothecomonas	Cryothecomonas_aestivalis
OTU_793	0	0	0	8.8e-06	0	0.0670605	0	0	0	0	0	0	0	0	0.00123532	0	0	0	0	0	0	1.54e-05	0	0	1.54e-05	0	0	0	0	0	0	0	1.48e-05	0.00150398	Eukaryota	Stramenopiles	Ochrophyta	Bacillariophyta	Bacillariophyta_X	Raphid-pennate	Pseudo-nitzschia	Pseudo-nitzschia_delicatissima
OTU_385	0.00102941	0.000421785	0.000147303	0.000756736	0.00315106	0.00390071	0.0445589	3.41e-05	0	0	0	0	0.00783684	0	0.000991736	6.76e-05	0	0	0.00140139	1.76e-05	1.45e-05	0.00179828	0.000873458	0.000235349	3.07e-05	0.0133726	0.00264561	0	0.0023889	0.0147162	0.0143778	0.040057	0.0106163	0.067458	Eukaryota	Alveolata	Ciliophora	Litostomatea	Haptoria_5	Pleurostomatida	Pleurostomatida_unclassified	Pleurostomatida_unclassified
OTU_3336	0.00228992	0.000474508	0.00206225	0.00256938	2.72e-05	0	0.000438164	5.69e-05	0	0	0	0	0	0	0	0.104348	0.114856	1.78e-05	0	0	0	1.54e-05	0	0	0	0	0	4.16e-05	0	0	0	0	0	0	Eukaryota	Alveolata	Ciliophora	Spirotrichea	Choreotrichida	Strobilidiidae_C	Strobilidiidae_C_X	Strobilidiidae_C_X_sp.
OTU_6663	0	0.000131808	6.31e-05	6.16e-05	0.0003803	9.55e-05	2.43e-05	0	0	0	0	0	0	0	0	0	0	0	0	0	0	0	0	0	0	0	2.04e-05	0	0	0	0	0.000266003	8.91e-05	0	Eukaryota	Alveolata	Dinoflagellata	Dinophyceae	Dinophyceae_unclassified	Dinophyceae_unclassified	Dinophyceae_unclassified	Dinophyceae_unclassified
OTU_299	0.000483193	2.64e-05	4.21e-05	6.16e-05	0	0	0.000316452	0	0	0	0	0	0	0	0	0	0.000152978	0	0	0	0	0	0	0	0	0	0	0	0	0	0	0	0	0	Eukaryota	Alveolata	Dinoflagellata	Dinophyceae	Dinophyceae_unclassified	Dinophyceae_unclassified	Dinophyceae_unclassified	Dinophyceae_unclassified
OTU_6649	0	0	0	2.64e-05	0	1.59e-05	0	0	0	0	0	3.47e-05	0	0.000141531	1.74e-05	0	0	0	0	0	0	0	5.46e-05	0	1.54e-05	0.000102081	4.07e-05	0	0	0	0	0	0	4.42e-05	Eukaryota	Opisthokonta	Choanoflagellida	Choanoflagellatea	Acanthoecida	Stephanoecidae_Group_H	Stephanoecidae_Group_H_unclassified	Stephanoecidae_Group_H_unclassified
OTU_5790	0	0.000184531	4.21e-05	7.04e-05	5.43e-05	0	0	0	0.000327158	0.000511834	0.00010053	0	0	0	0	0.000135254	0	0	0	0.000546969	0.000261339	0.00295103	0.00296157	0.000706048	0.00016896	0.00717484	0.000203508	0.00477932	0.000316178	0	0	0.000485065	0.000460289	0.000575052	Eukaryota	Alveolata	Ciliophora	Spirotrichea	Strombidiida	Strombidiida_unclassified	Strombidiida_unclassified	Strombidiida_unclassified
OTU_21890	0.000336134	0.000158169	6.31e-05	0.000140788	0.000135822	0.000636851	0	0	0	0	1.44e-05	0	1.4e-05	0	0	0	0	0	0	0	0	0	0	0	0	0	0	0	0	0	0	0	0.000608769	0.000398113	Eukaryota	Alveolata	Dinoflagellata	Dinophyceae	Dinophyceae_unclassified	Dinophyceae_unclassified	Dinophyceae_unclassified	Dinophyceae_unclassified
OTU_2551	0	0	0	0	2.72e-05	9.55e-05	0	0	0	0	0	0	0	0	0	0	0	0	0	0	0	0	0	0	0	0	2.04e-05	0	0	0	0	4.69e-05	0.000267265	0.000176939	Eukaryota	Opisthokonta	Choanoflagellida	Choanoflagellatea	Acanthoecida	Stephanoecidae_Group_D	Stephanoecidae_Group_D_unclassified	Stephanoecidae_Group_D_unclassified
OTU_7281	8.4e-05	0.000131808	0.00025252	0.000149587	0	0	0	0	0	0	0	0	0	0	0	0	0	0	0	0	0	0	0	0	0	0	0	0	0	0	0	0	0	0	Eukaryota	Stramenopiles	Ochrophyta	Chrysophyceae	Chrysophyceae_X	Chrysophyceae_Clade-D	Chrysophyceae_Clade-D_X	Chrysophyceae_Clade-D_X_sp.
OTU_2295	0	0	0	0	0	0	0.000182568	0	0	0	0	0	0	0	0	0.000631185	0.000260062	0.000142351	0	0	1.45e-05	7.68e-05	0	0	0	0	0	0	0	0	0	0	0	0	Eukaryota	Stramenopiles	Ochrophyta	Chrysophyceae	Chrysophyceae_X	Chrysophyceae_Clade-C	Chrysophyceae_Clade-C_X	Chrysophyceae_Clade-C_X_sp.
OTU_1337	0	0	0	0	0	0	0	0.000113799	0	0	0	0	0	0	0	0.000608643	0	0	0	0	0	0	0	0	0	0	0	0	0	0	0	0	0	0	Eukaryota	Hacrobia	Haptophyta	Prymnesiophyceae	Isochrysidales	Isochrysidales_unclassified	Isochrysidales_unclassified	Isochrysidales_unclassified
OTU_1210	0	0	0	0	0	6.37e-05	0	0	0	0.00118251	0	0	0	0.00240603	0	0	0	0	0	0	0	0	0	0	0	0	0	0	0	0	0	0	0	0	Eukaryota	Opisthokonta	Choanoflagellida	Choanoflagellatea	Craspedida	Monosigidae_Group_M	Monosigidae_Group_M_X	Monosigidae_Group_M_X_sp.
OTU_5491	0	0	0	8.8e-06	2.72e-05	0	0	0	0	0	0	0	0	0	0	0	0	0	0	1.76e-05	0	0.000691648	0.000150126	2.35e-05	0.00010752	4.37e-05	2.04e-05	0	0.000526963	0	0	0	5.94e-05	0.000103214	Eukaryota	Stramenopiles	Ochrophyta	Bacillariophyta	Bacillariophyta_X	Polar-centric-Mediophyceae	Chaetoceros	Chaetoceros_brevis
OTU_276	2.1e-05	0.0154742	0.005345	0.00615948	0.0124956	0	0	0	0	0.00148255	0	0	0.000824195	0.00155684	0.00107873	0	0	0	0	0	0	0.000307399	0.000573207	0.000258884	0.000291841	0.000554154	0.000101754	0.000664949	0.000316178	0	0.000892414	0.00278521	0.000118784	8.85e-05	Eukaryota	Stramenopiles	Ochrophyta	Bacillariophyta	Bacillariophyta_X	Polar-centric-Mediophyceae	Chaetoceros	Chaetoceros_decipiens
OTU_186	0	0	0	0	0	0.000605009	0	0	0	0	0	0	0	0	0	0	0	0	0	1.76e-05	0	0.000906827	2.73e-05	0	0	0.000131247	0	0	0	0	0	0	0.00014848	4.42e-05	Eukaryota	Alveolata	Ciliophora	Spirotrichea	Strombidiida	Strombidiidae_B	Strombidiidae_B_X	Strombidiidae_B_X_sp.
OTU_3176	0.000231092	0	8.42e-05	8.8e-06	2.72e-05	0.000429875	0	0	0	0	0.000315951	0	0	0	0	0	0	0	0	0	0	0	0	0	0	0	0	0	0	0	0	0	0.00172237	0	Eukaryota	Alveolata	Dinoflagellata	Syndiniales	Dino-Group-III	Dino-Group-III_X	Dino-Group-III_XX	Dino-Group-III_XX_sp.
OTU_2631	0.00210084	0.000316339	0.000778603	0.00035197	0.00141254	0.00012737	0	0	0	0.00180024	0.000631902	0.00145621	0.00134106	0.00682888	0	0	0	0	0	0	0	7.68e-05	0.000204717	0.000164745	4.61e-05	0.000408324	0.000203508	0	0.000386439	0	0.00740373	0	0.000994818	4.42e-05	Eukaryota	Hacrobia	Haptophyta	Prymnesiophyceae	Prymnesiales	Chrysochromulinaceae	Chrysochromulina	Chrysochromulina_unclassified
OTU_1586	0	0.000210893	0.00012626	5.28e-05	5.43e-05	0	0	0	0.000763369	0.000582432	0.000344674	8.67e-05	1.4e-05	1.18e-05	8.7e-05	0.000202881	0	0	0	0.000846919	0.000188745	0.00442655	0.00360301	0.00169452	0.000414721	0.00424365	0.000101754	0.00652481	0.000386439	0	0	0.000610243	0.000489985	0.000427602	Eukaryota	Alveolata	Ciliophora	Spirotrichea	Strombidiida	Strombidiidae_R	Strombidiidae_R_X	Strombidiidae_R_X_sp.
OTU_5018	2.1e-05	0.000105446	6.31e-05	4.4e-05	0.000135822	7.96e-05	0	0	0	0	0	0	0	0	0	0	0	0	0	0	0	0	0	0	0	0	0	0	0	0	0	0	1.48e-05	1.47e-05	Eukaryota	Alveolata	Dinoflagellata	Dinophyceae	Dinophyceae_unclassified	Dinophyceae_unclassified	Dinophyceae_unclassified	Dinophyceae_unclassified
OTU_295	0.00243698	0.000527232	0.000652343	0.00146948	0	0	0	4.55e-05	0	0	0	0	0	0	0	0	0	0	0	0	0	0	0	0	0	0	0	0	0	0	0	0	0	0	Eukaryota	Rhizaria	Cercozoa	Filosa-Imbricatea	Thaumatomonadida	Peregriniidae	Peregrinia	Peregrinia_sp.
OTU_1898	0	0	0	0	0	0	0	0	0	0	0	0	0	0	0	0.000541016	0.000152978	0.000124557	3.95e-05	0	0	0	0	0	0	0	0	0	3.51e-05	0	0	0	0	0	Eukaryota	Stramenopiles	Ochrophyta	Synurophyceae	Synurales	Synurales_X	Synurales_XX	Synurales_XX_sp.
OTU_1014	0	0	0	0	0	0.00238819	0	0	0	0	0	0	0	0	0	0	0	0	0	0	0	0	0	0	0	5.83e-05	0	0	0	0	3.31e-05	0.00017212	5.94e-05	7.37e-05	Eukaryota	Alveolata	Ciliophora	Spirotrichea	Spirotrichea_unclassified	Spirotrichea_unclassified	Spirotrichea_unclassified	Spirotrichea_unclassified
OTU_14170	0	2.64e-05	0	0	0	0	0	2.28e-05	0	0.00199439	0.000962215	0.000121351	0	0.0012384	0	2.25e-05	0	0	0.000513185	0.00224081	0.000493641	0.00422674	0.00221094	0.000917863	0.00333313	0.000787482	0.00234035	0	0.00302125	0	0	0	0.00136602	4.42e-05	Eukaryota	Stramenopiles	Ochrophyta	Chrysophyceae	Chrysophyceae_X	Chrysophyceae_Clade-C	Chrysophyceae_Clade-C_X	Chrysophyceae_Clade-C_X_sp.
OTU_2185	0	0.00255707	0.0012626	0.000580751	0.000353136	0	0	0	0	0	0	0	0	0	0	0	0	0	0	0	0	0	0.000259308	0	3.07e-05	1.46e-05	2.04e-05	0	0.000175654	0	0	0	1.48e-05	0	Eukaryota	Alveolata	Ciliophora	Spirotrichea	Strombidiida	Strombidiida_unclassified	Strombidiida_unclassified	Strombidiida_unclassified
OTU_4576	0	0	0	0	0	0	0	0	0	0	0	0	0	0.000141531	0	0	0	0	7.9e-05	0	4.36e-05	0	0	0	0	0	0	0	0	0	0	1.56e-05	1.48e-05	0.000176939	Eukaryota	Rhizaria	Cercozoa	Filosa-Thecofilosea	Ventricleftida	CCW10-lineage	CCW10-lineage_X	CCW10-lineage_X_sp.
OTU_695	0.000378151	0.000184531	8.42e-05	0.000219981	0	0	0.000304281	7.97e-05	0	0	0	0	0	0	0	0.000315593	0.00082608	3.56e-05	0.00037502	1.76e-05	0	0	0	0	0	0	0	0	0	0	0	0	0	0	Eukaryota	Stramenopiles	Ochrophyta	Chrysophyceae	Chrysophyceae_X	Chrysophyceae_Clade-B2	Chrysosphaerella	Chrysosphaerella_unclassified
OTU_763	0	0	0	4.4e-05	8.15e-05	0.028308	0	0	0	0	0	0	0	0.000200502	0.00280122	0	1.53e-05	0	0	3.53e-05	0	1.54e-05	0.000136478	0	0.00012288	7.29e-05	0	0	7.03e-05	0	0	6.26e-05	8.91e-05	0.00154822	Eukaryota	Stramenopiles	Ochrophyta	Bacillariophyta	Bacillariophyta_X	Raphid-pennate	Fragilariopsis	Fragilariopsis_cylindrus
OTU_22	0	0	2.1e-05	8.8e-06	0	6.37e-05	0	1.14e-05	0.000967843	0.000476535	0.00169465	0	5.59e-05	0.00409261	0.00189648	0.000653727	0	0	3.95e-05	8.82e-05	0.000261339	0.000614798	0.0024566	0.00192987	0.00119808	0.0064311	0.00693964	0.00128834	0.00235377	0	0.00198314	0.00164296	0.00354868	0.00212327	Eukaryota	Opisthokonta	Choanoflagellida	Choanoflagellatea	Acanthoecida	Stephanoecidae_Group_H	Diaphanoeca	Diaphanoeca_grandis
OTU_5207	0	0	0	0	0	0	0	3.41e-05	0	0	0	0	0	0	0	0.000112712	0	0.000124557	5.92e-05	5.29e-05	1.45e-05	3.07e-05	0	0	0	0	0	0	0	0	0	0	0	0	Eukaryota	Archaeplastida	Chlorophyta	Chlorophyceae	Chlamydomonadales	Chlamydomonadales_X	Wislouchiella	Wislouchiella_planctonica
OTU_768	0	0.00548321	0.00214642	0.0011527	0.00641078	3.18e-05	0	0	0.00302621	0	0	0	0	0	0	0	0	0	0	3.53e-05	2.9e-05	0.000276659	2.73e-05	0.000282419	3.07e-05	0	2.04e-05	0	0.000105393	0	0	0	0.000207872	0.000103214	Eukaryota	Archaeplastida	Chlorophyta	Mamiellophyceae	Mamiellales	Mamiellaceae	Micromonas	Micromonas_clade_B_subarctic
OTU_494	0	0	0	0	0	0	0.0228576	0	0	0.0264389	0	0	0	0	0	0	1.53e-05	0	0	0	0	0	0	0	0	0	0	0	0	0	0	0	0	0	Eukaryota	Archaeplastida	Chlorophyta	Ulvophyceae	Cladophorales	Cladophorales_X	Cladophora	Cladophora_unclassified
OTU_799	0	0	0	0	0	0	0	2.28e-05	0	0	0	0	0	0.000200502	0	0	0	5.34e-05	0.00161851	0.000158797	0.00062431	0.0001537	0.000136478	0	0	0.000160413	0	0.00058183	0	0	0	0	2.97e-05	0	Eukaryota	Rhizaria	Cercozoa	Filosa-Thecofilosea	Ventricleftida	Ventricleftida_X	Ventricleftida_XX	Ventricleftida_XX_sp.
OTU_21444	0.000420168	0.000553593	0.00149408	0.00129349	0.00339554	0.000652773	0	0	0	0	0	0	0	0	0	0	0	0	0	0	0	0	1.36e-05	0	1.54e-05	1.46e-05	2.04e-05	0	0	0	0.00264419	0	7.42e-05	0	Eukaryota	Alveolata	Dinoflagellata	Dinophyceae	Dinophyceae_unclassified	Dinophyceae_unclassified	Dinophyceae_unclassified	Dinophyceae_unclassified
OTU_217	0	0.00282069	0.00178868	0.000906323	0.000570451	0	0	0	0	0	1.44e-05	0	0	0	0	0	0	0	0	5.29e-05	0	4.61e-05	0.000436729	0	4.61e-05	0.000116664	2.04e-05	0	0.000351309	0	0	0	4.45e-05	1.47e-05	Eukaryota	Alveolata	Ciliophora	Spirotrichea	Strombidiida	Strombidiidae_R	Strombidium_R	Strombidium_R_unclassified
OTU_13735	0	0	0	0	0	0	0	0.000330018	1.36e-05	0	0	0	0	0	0	0.000721354	0.00162156	0.00032029	0.000197379	0	0	0	0	0	0	0	0	0	0	0	0	0	0	0	Eukaryota	Hacrobia	Cryptophyta	Cryptophyceae	Cryptophyceae_X	Basal_Cryptophyceae-1	Basal_Cryptophyceae-1_X	Basal_Cryptophyceae-1_X_sp.
OTU_1601	0	0	0	0	2.72e-05	0	0	0	0	0	0	0	0	0	0.000365376	0	0	0	0	0.00134096	0	0.00133719	0.00556829	0.000541304	0.00241153	0.00186662	0.000142456	4.16e-05	0.00474267	0	0	0.000234709	0.000668161	0.000412858	Eukaryota	Alveolata	Ciliophora	Spirotrichea	Strombidiida_B	Strombidiida_B_X	Strombidiida_B_XX	Strombidiida_B_XX_sp.
OTU_12992	0	0.000105446	8.42e-05	0	2.72e-05	0	0	0	0	0	1.44e-05	0	0	0	0	0	0	0	0.00027633	0	0	0	0	0	0	0	0	0	0	0	0	0	0	0	Eukaryota	Alveolata	Ciliophora	Spirotrichea	Strombidiida	Tontoniidae_A	Laboea	Laboea_strobila
OTU_3539	0	0.000579955	0.000547127	0.000193584	0.000407465	6.37e-05	0	0	0	0	0	0	0	0	0	0	0	0	0	0	0	0	0	0	0	0	0	0	0	0	0	0	0	0	Eukaryota	Hacrobia	Cryptophyta	Cryptophyceae	Cryptophyceae_X	Cryptomonadales	Teleaulax	Teleaulax_amphioxeia
OTU_60	0.00092437	0.000316339	0.000231477	0.000175985	0	0	0.000206911	0	0	0	0	0	0	0	0	2.25e-05	0.000183573	1.78e-05	0	0	0	0	0	0	0	0	0	0	0	0	0	0	0	0	Eukaryota	Stramenopiles	Ochrophyta	Chrysophyceae	Chrysophyceae_X	Chrysophyceae_Clade-D	Chrysophyceae_Clade-D_X	Chrysophyceae_Clade-D_X_sp.
OTU_3215	0	7.91e-05	2.1e-05	0	0.00019015	4.78e-05	0	0	0	0	0	1.73e-05	0.00131312	0	0	0	0	0	0	0	0	0	0	0	0	0	0	0	0	0	0	3.13e-05	1.48e-05	1.47e-05	Eukaryota	Alveolata	Dinoflagellata	Dinophyceae	Peridiniales	Peridiniales_unclassified	Peridiniales_unclassified	Peridiniales_unclassified
OTU_21455	0	0	2.1e-05	2.64e-05	0	3.18e-05	0.00205694	0	0	0.00172965	0.000761155	0	0	1.18e-05	0	0	0	0	0	0	0	0	0	0	0	0	0	0	0	0	0	0	2.97e-05	0	Eukaryota	Alveolata	Dinoflagellata	Dinophyceae	Dinophyceae_unclassified	Dinophyceae_unclassified	Dinophyceae_unclassified	Dinophyceae_unclassified
OTU_1588	0	0	0	0	0	0.0007483	0	0	0	0	0	0	0.000433052	0	0	0	0	0	3.95e-05	0	0	3.07e-05	0	0	0	0	0	0	0	0	0	0	0	5.9e-05	Eukaryota	Stramenopiles	Ochrophyta	Bacillariophyta	Bacillariophyta_X	Polar-centric-Mediophyceae	Detonula	Detonula_confervacea
OTU_13565	0	0.000105446	2.1e-05	1.76e-05	0	0	0	0	0	0	0	0	0	0	0	0	0	0	0	3.53e-05	0	0.00010759	8.19e-05	2.35e-05	7.68e-05	4.37e-05	0	0	0.000105393	0	0	0	0	1.47e-05	Eukaryota	Alveolata	Ciliophora	Spirotrichea	Strombidiida	Strombidiidae_R	Strombidium_R	Strombidium_R_unclassified
OTU_3934	0	0.00181895	0.00229372	0.00180385	0.00279793	0.000191055	0	0	0	0	0	0	0	0	0	0	0	0	0	0.000282306	0	0.000199809	0.000204717	0	4.61e-05	4.37e-05	2.04e-05	0	0	0	0	0	0	0.000103214	Eukaryota	Alveolata	Ciliophora	Ciliophora_X	Ciliophora_XX	Ciliophora_XXX	Mesodinium	Mesodinium_rubrum
OTU_1082	0	0	4.21e-05	1.76e-05	0.000217315	0.005461	0	0	0	0	0	0	0	0	0	0	0	0	0	0	0	0	0	0.0014827	0	0	0	0	0	0	0	0	0	0	Eukaryota	Hacrobia	Picozoa	Picozoa_X	Picozoa_XX	Picozoa_XXX	Picozoa_XXXX	Picozoa_XXXX_sp.
OTU_1501	0	0	0	0	2.72e-05	0	0	0	0	0	0	0	0	0	6.96e-05	0	0	0	0	0	0	0.000245919	0.000696037	0	9.22e-05	0.000408324	4.07e-05	0	0.000175654	0	0	0	1.48e-05	0	Eukaryota	Alveolata	Ciliophora	Spirotrichea	Strombidiida	Strombidiidae_R	Strombidiidae_R_unclassified	Strombidiidae_R_unclassified
OTU_3424	0.0154202	0.00266252	0.00119947	0.000607149	0	0	0.0224681	0.0319093	0	0	1.44e-05	1.73e-05	0	0	0	0.014923	0.0163686	0.00800726	0.00380941	0.000282306	1.45e-05	7.68e-05	0	0	0	0	0	0	0	0	0	0	0	0	Eukaryota	Hacrobia	Cryptophyta	Cryptophyceae	Cryptophyceae_X	Basal_Cryptophyceae-1	Basal_Cryptophyceae-1_X	Basal_Cryptophyceae-1_X_sp.
OTU_3274	4.2e-05	0.000184531	0.00018939	0.000105591	0.000407465	0.000191055	0	0	0	0	0	0	0	0	0	0	0	0	0	0	0	0	0	0	0	0	0	0	0	0	0	0.000359887	0.000460289	0	Eukaryota	Alveolata	Dinoflagellata	Dinophyceae	Dinophyceae_unclassified	Dinophyceae_unclassified	Dinophyceae_unclassified	Dinophyceae_unclassified
OTU_613	0.000210084	7.91e-05	4.21e-05	4.4e-05	0	0	0	0.00168423	0	0	0	0	0	0	0	0.000180339	0.000107084	0	0	0	0	0	0	0	0	0	0	0	0	0	0	0	0	0	Eukaryota	Stramenopiles	Ochrophyta	Chrysophyceae	Chrysophyceae_X	Chrysophyceae_Clade-G	Chrysophyceae_Clade-G_X	Chrysophyceae_Clade-G_X_sp.
OTU_1184	0	0	0	0	0	0	0	0	0	0	0.00101966	0	0	0.000200502	0	0	0	0	0	0	0	0	0	0	0	0	0	0	0	0	0	0	0	0	Eukaryota	Stramenopiles	Stramenopiles_X	MAST	MAST-8	MAST-8D	MAST-8D_X	MAST-8D_X_sp.
OTU_6817	0	7.91e-05	2.1e-05	6.16e-05	0.000434629	9.55e-05	0	0	0	0	0	0	0	0	0	0	0	0	0	0	0	0	0	0	0	0	2.04e-05	0	0	0	0	0	0.000178176	2.95e-05	Eukaryota	Alveolata	Dinoflagellata	Dinophyceae	Dinophyceae_unclassified	Dinophyceae_unclassified	Dinophyceae_unclassified	Dinophyceae_unclassified
OTU_483	0	0	0	0	0	7.96e-05	0	0	0	0	0	0	0	0	0	0	0	0	0	0	0	0	0	0	0	0	0	0	0	0.000404291	0	0	0.000534529	0	Eukaryota	Stramenopiles	Stramenopiles_X	MAST	MAST-1	MAST-1C	MAST-1C_X	MAST-1C_X_sp.
OTU_9115	0	5.27e-05	6.31e-05	6.16e-05	0.000135822	1.59e-05	0	1.14e-05	5.45e-05	0	0	0	0	0	3.48e-05	0	0	0	0	7.06e-05	1.45e-05	0	4.09e-05	0	1.54e-05	2.92e-05	0	0	7.03e-05	0	0	0	0	0	Eukaryota	Alveolata	Ciliophora	Litostomatea	Haptoria_4	Didiniidae	Didiniidae_X	Didiniidae_X_sp.
OTU_391	0.000651261	0.000184531	6.31e-05	7.04e-05	0	0	0	1.14e-05	0	0	0	0	0	0	0	0.000112712	0.000122382	7.12e-05	3.95e-05	1.76e-05	0	0	0	0	0	0	0	0	0	0	0	0	0	0	Eukaryota	Stramenopiles	Ochrophyta	Chrysophyceae	Chrysophyceae_X	Chrysophyceae_Clade-C	Dinobryon	Dinobryon_divergens
OTU_7711	0	0	0	0	0	0	0	0	0	0	0	0	0	0	0	0.000157796	0	0.000907489	0.00126322	0.000141153	7.26e-05	1.54e-05	0	0	1.54e-05	0	0	0	0	0	0	0	0	0	Eukaryota	Stramenopiles	Ochrophyta	Chrysophyceae	Chrysophyceae_X	Chrysophyceae_X_unclassified	Chrysophyceae_X_unclassified	Chrysophyceae_X_unclassified
OTU_5383	0	0	0	0	0	0	0	0	0	0	0	0	0	0.000200502	0.00125272	0	0	0	0	0	0	0	0	0	0	0	0	0	0	0	0	0	0	0	Eukaryota	Opisthokonta	Choanoflagellida	Choanoflagellatea	Acanthoecida	Stephanoecidae_Group_H	Stephanoecidae_Group_H_unclassified	Stephanoecidae_Group_H_unclassified
OTU_3839	0	7.91e-05	0.00025252	0.000140788	0.000434629	7.96e-05	0	0	0	0	1.44e-05	0	0	0	0	0	0	0	0	0	4.36e-05	1.54e-05	1.36e-05	0	0	0	0	0	0	0	0	0	0	0	Eukaryota	Alveolata	Dinoflagellata	Dinophyceae	Dinophyceae_unclassified	Dinophyceae_unclassified	Dinophyceae_unclassified	Dinophyceae_unclassified
OTU_4598	0	0	2.1e-05	3.52e-05	5.43e-05	0.000111449	0	0	0	0	0	0	0.00230495	0	0	0	0	0	7.9e-05	0	0	0	0	0	0	0	0	0	0	0	0	0	7.42e-05	0	Eukaryota	Alveolata	Dinoflagellata	Dinophyceae	Dinophyceae_unclassified	Dinophyceae_unclassified	Dinophyceae_unclassified	Dinophyceae_unclassified
OTU_2007	0	0.00105446	0.00012626	0.000334372	0.000869258	0	0	0	5.45e-05	0	1.44e-05	3.47e-05	0	0.000306651	6.96e-05	0	0	0	0	0	0	1.54e-05	4.09e-05	0	1.54e-05	2.92e-05	0	0	3.51e-05	0	0	0	0	0	Eukaryota	Stramenopiles	Ochrophyta	Bacillariophyta	Bacillariophyta_X	Polar-centric-Mediophyceae	Chaetoceros	Chaetoceros_decipiens
OTU_15839	0	0.00118627	0.00012626	0.000175985	0.000896422	0	0	0	0	1.76e-05	0	1.73e-05	0	0.000153325	0	0	0	0	0	0	0	1.54e-05	0	0	0	0	0	0	0	0	0	0	0	0	Eukaryota	Stramenopiles	Ochrophyta	Bacillariophyta	Bacillariophyta_X	Polar-centric-Mediophyceae	Chaetoceros	Chaetoceros_decipiens
OTU_62	0	0	0	0	0	4.78e-05	0	0	0	0.00107662	0.00970832	0	0.000433052	0.00055433	0	0	0	0	0.000315806	0.00164091	0.000813055	0.00607113	0.00131019	0.00178866	0.00311809	0.000116664	0.00187228	0	0.0115581	0	0	0	0.013779	0.000353878	Eukaryota	Stramenopiles	Ochrophyta	Chrysophyceae	Chrysophyceae_X	Chrysophyceae_Clade-H	Chrysophyceae_Clade-H_X	Chrysophyceae_Clade-H_X_sp.
OTU_1802	0.000756303	0.000184531	0.000294607	0.000492758	0	0	0	0.000113799	0	0	0	0	0	0	0	0	0.000152978	0.000231321	0.000157903	0	0	0	0	0	1.54e-05	0	0	0	0	0	0	0	0	0	Eukaryota	Rhizaria	Cercozoa	Filosa-Imbricatea	Spongomonadida	Spongomonadidae	Spongomonas	Spongomonas_unclassified
OTU_21228	0	2.64e-05	4.21e-05	2.64e-05	8.15e-05	3.18e-05	0.00270201	0	0	0.00210028	0.000933492	0	0	4.72e-05	0	0	0	0	0	0	0	0	0	0	0	0	0	0	0	0	0	0	2.97e-05	0	Eukaryota	Alveolata	Dinoflagellata	Dinophyceae	Dinophyceae_unclassified	Dinophyceae_unclassified	Dinophyceae_unclassified	Dinophyceae_unclassified
OTU_341	0	0.00115991	0.00336693	0.00223501	0.00431913	0.00254741	0	1.14e-05	0	0	0	1.73e-05	0	0	0.000173989	0	0	0	7.9e-05	0.000158797	2.9e-05	0	0.000191069	0	0.00018432	0.000452073	0.000162807	0	0.000210785	0	0	1.56e-05	0	1.47e-05	Eukaryota	Alveolata	Ciliophora	Litostomatea	Haptoria_4	Didiniidae	Didiniidae_X	Didiniidae_X_sp.
OTU_429	0	0	0	1.76e-05	0	0.000143292	0	0	0	0	0.00113455	0	0	0.00063689	0	0	0	0	0	0	1.45e-05	0.00013833	5.46e-05	0	6.14e-05	0.000189579	0.000101754	0	0	0	0	0.00128307	0	0.000309643	Eukaryota	Stramenopiles	Ochrophyta	Bacillariophyta	Bacillariophyta_X	Raphid-pennate	Cylindrotheca	Cylindrotheca_closterium
OTU_3690	0	0.000659039	0.000231477	0.000167186	8.15e-05	0	0	0	0	0	0	0	0	0	0	0	0	0	0	0.000282306	0	0.000322769	0.000109182	9.41e-05	3.07e-05	4.37e-05	2.04e-05	0	0.000105393	0	0	0	0	0	Eukaryota	Alveolata	Ciliophora	Spirotrichea	Strombidiida	Strombidiidae_R	Strombidium_R	Strombidium_R_unclassified
OTU_348	0	0	0	0	0	0	0	1.14e-05	0.000272632	0	0	0	0	0	0	0.0269606	0.0279643	0.00656595	0.000552661	0.000317595	0.000842093	0.000199809	0.00036849	0	0	1.46e-05	0	0	0	0	0	0	0	0	Eukaryota	Stramenopiles	Ochrophyta	Bacillariophyta	Bacillariophyta_X	Raphid-pennate	Surirella	Surirella_unclassified
OTU_630	0.000105042	7.91e-05	2.1e-05	8.8e-06	0	0	0.00550139	0	0	0	0	0	0	0	0	2.25e-05	0.000198871	5.34e-05	0	0	0	0	0	0	0	0	0	0	0	0	0	0	0	0	Eukaryota	Stramenopiles	Ochrophyta	Chrysophyceae	Chrysophyceae_X	Chrysophyceae_X_unclassified	Chrysophyceae_X_unclassified	Chrysophyceae_X_unclassified
OTU_1357	0	0	0	0	0	1.59e-05	0	0	0.00124047	0.00095307	0.00109147	0	0.000866103	0.000625096	0.00250544	0	0	0	0	0	0	0	5.46e-05	0	0	5.83e-05	0	0.00498712	0	0	0	0	0	0.000987909	Eukaryota	Stramenopiles	Ochrophyta	Bolidophyceae	Parmales	Triparmaceae	Triparma	Triparma_pacifica
OTU_715	0	0	0	0	0	0	0	0	0	0	0	0	0	0	0	0.00200627	0.00143799	0.000142351	0	0	0	0	0	0	0	0	0	0	0	0	0	0	0	0	Eukaryota	Stramenopiles	Ochrophyta	Chrysophyceae	Chrysophyceae_X	Chrysophyceae_Clade-G	Chrysophyceae_Clade-G_X	Chrysophyceae_Clade-G_X_sp.
OTU_23251	0.000210084	0	2.1e-05	0	5.43e-05	7.96e-05	0	0	0	0	0	0	0	0	0	0	0	0	0	0	0	0	0	0	0	0	0	0	0	0	0	0	0.000133632	0	Eukaryota	Alveolata	Dinoflagellata	Dinophyceae	Dinophyceae_unclassified	Dinophyceae_unclassified	Dinophyceae_unclassified	Dinophyceae_unclassified
OTU_1793	0	0.00224073	0.00119947	0.000422364	0.00143971	0.000509481	0	0	0	0	0.00132125	0	0	0	0	0	0	0	0	0	0	0	0	0	1.54e-05	0	4.07e-05	0	0	0	0	0	0.000386049	0	Eukaryota	Hacrobia	Haptophyta	Prymnesiophyceae	Prymnesiales	Prymnesiaceae	Haptolina	Haptolina_sp.
OTU_1925	0.00159664	0.000421785	0.00031565	0.000483959	0	0	0	0	0	0	0	0	0	0	0	0	1.53e-05	0	0	0	0	0	0	0	0	0	0	0	0	0	0	0	0	0	Eukaryota	Rhizaria	Cercozoa	Cercozoa_unclassified	Cercozoa_unclassified	Cercozoa_unclassified	Cercozoa_unclassified	Cercozoa_unclassified
OTU_1176	0	0	0	0	0	0	0	4.55e-05	0.000109053	0	0	0	0	0	0	0.000135254	0.000214169	0.000676169	0.000473709	0.000194086	7.26e-05	0.000430359	4.09e-05	0	9.22e-05	0	0	0	0	0	0	0	0	0	Eukaryota	Stramenopiles	Ochrophyta	Bacillariophyta	Bacillariophyta_X	Polar-centric-Mediophyceae	Stephanodiscus	Stephanodiscus_unclassified
OTU_4509	0	0.000210893	2.1e-05	8.8e-06	0	0	0	0	0	0	0	0	0	0	1.74e-05	0	0	0	0	0	0	0.00012296	1.36e-05	0	4.61e-05	0	0	0	3.51e-05	0	0	0	0	1.47e-05	Eukaryota	Hacrobia	Cryptophyta	Cryptophyceae	Cryptophyceae_X	Cryptomonadales	Cryptomonadales_unclassified	Cryptomonadales_unclassified
OTU_11341	0	2.64e-05	2.1e-05	0	0	0	0	0	0	0	0	0	0	0	0	0	0	0	0	0	0	9.22e-05	9.55e-05	2.35e-05	1.54e-05	1.46e-05	0	0	0.000105393	0	0	0	0	0	Eukaryota	Alveolata	Ciliophora	Spirotrichea	Strombidiida	Strombidiidae_R	Strombidium_R	Strombidium_R_unclassified
OTU_11002	0	0.000790847	0.000273563	0.000149587	0.00019015	0	0	0	0	0	0	0	0	0	0	0	0	0	0	0	0	1.54e-05	2.73e-05	0	3.07e-05	0	0	0	0	0	0	0	0	1.47e-05	Eukaryota	Alveolata	Ciliophora	Spirotrichea	Strombidiida	Strombidiidae_R	Strombidium_R	Strombidium_R_unclassified
OTU_253	0	0	2.1e-05	0	0	3.18e-05	0	0	0	0	0	0	0	0	0	0	0	0	0	0	0	0	0	0	0	0	0	0	0	0	0	0.000359887	0	1.47e-05	Eukaryota	Rhizaria	Cercozoa	Filosa-Thecofilosea	Cryomonadida	Protaspa-lineage	Protaspa-lineage_X	Protaspa-lineage_X_sp.
OTU_770	6.3e-05	0	0	3.52e-05	0	0	0.00203259	0	0	0	0	0	0	0	0	0.000157796	0.000443635	0	0	0	0	0	0	0	0	0	0	0	0	0	0	0	0	0	Eukaryota	Stramenopiles	Ochrophyta	Chrysophyceae	Chrysophyceae_X	Chrysophyceae_XX	Chrysophyceae_XXX	Chrysophyceae_XXX_sp.
OTU_2173	0	0	0	0	0	0	0	0	0	0.00102367	0.000488288	0	0	0	0	0	1.53e-05	0	0.000236855	0.000670478	0.000203264	0.000537948	4.09e-05	0	0	8.75e-05	0	0	0	0	0	0	4.45e-05	0	Eukaryota	Rhizaria	Cercozoa	Filosa-Thecofilosea	Ebriida	Ebriida_unclassified	Ebriida_unclassified	Ebriida_unclassified
OTU_74	0.00327731	0.00105446	0.00113634	0.00222621	0	0	0.0105038	0.00199149	0	0	0	0	0	0	0	0.00130745	0.0027689	5.34e-05	5.92e-05	0	0	0	0	0	0	0	0	0	0	0	0	0	0	0	Eukaryota	Stramenopiles	Ochrophyta	Chrysophyceae	Chrysophyceae_X	Chrysophyceae_Clade-C	Chrysophyceae_Clade-C_unclassified	Chrysophyceae_Clade-C_unclassified
OTU_3763	0	0	0	0	0	0	0	0	0	0.00107662	0.000861685	0.000242702	0	2.36e-05	0	2.25e-05	3.06e-05	0	0	3.53e-05	0	9.22e-05	0.000204717	2.35e-05	9.22e-05	4.37e-05	0.000203508	0	0.000175654	0	0	0	0	0	Eukaryota	Stramenopiles	Ochrophyta	Chrysophyceae	Chrysophyceae_X	Chrysophyceae_Clade-F	Chrysophyceae_Clade-F_X	Chrysophyceae_Clade-F_X_sp.
OTU_1098	0	0	0	0	5.43e-05	0	0	0	0.00204474	0.0048889	0.00323132	0.00249636	0.0032409	0.00597969	0	0	0	0	0	0	0	0.00012296	0.000109182	0.000894328	0.00010752	0	0.000284912	0	3.51e-05	0	0	0	0.000178176	0	Eukaryota	Hacrobia	Telonemia	Telonemia_X	Telonemia_XX	Telonemia-Group-2	Telonemia-Group-2_X	Telonemia-Group-2_X_sp.
OTU_1039	0.000882353	0.000606316	8.42e-05	0.00012319	0	0	0	0	0	0	0	0	0	0	0	0	4.59e-05	0	0	0	0	0	0	0	0	0	0	0	0	0	0	0	0	0	Eukaryota	Archaeplastida	Chlorophyta	Chlorophyceae	Chlamydomonadales	Chlamydomonadales_X	Chlamydomonadales_X_unclassified	Chlamydomonadales_X_unclassified
OTU_3913	0	2.64e-05	0	8.8e-06	2.72e-05	0	0	0	0	0	1.44e-05	0	0	0.000117943	6.96e-05	0	0	0	0	0	0	3.07e-05	1.36e-05	0	1.54e-05	4.37e-05	4.07e-05	0	0.000105393	0	0	6.26e-05	4.45e-05	1.47e-05	Eukaryota	Archaeplastida	Chlorophyta	Mamiellophyceae	Mamiellales	Mamiellaceae	Micromonas	Micromonas_unclassified
OTU_1576	0	0.000579955	0.0011153	0.00109991	0.00372151	0.00036619	0	0.000284498	0.000477106	0	2.87e-05	0	0	0	0.000295781	0	0	7.12e-05	0.000118427	0.000564613	0.000348452	4.61e-05	0.00207446	7.06e-05	0.00239617	0.00412699	0.000549473	0	0.00168628	0	0	0	0.000296961	8.85e-05	Eukaryota	Alveolata	Ciliophora	Litostomatea	Haptoria_4	Didiniidae	Didiniidae_X	Didiniidae_X_sp.
OTU_544	0	0	0	0	0	1.59e-05	0	0	0	0	0	0	0	0.000117943	0.000974337	0	0	0	0	0	0	3.07e-05	1.36e-05	0	0	4.37e-05	0	0	0	0	0	0.000422476	0.000534529	0.000398113	Eukaryota	Stramenopiles	Ochrophyta	Bacillariophyta	Bacillariophyta_X	Radial-centric-basal-Coscinodiscophyceae	Radial-centric-basal-Coscinodiscophyceae_unclassified	Radial-centric-basal-Coscinodiscophyceae_unclassified
OTU_1037	0	0.000105446	0	0	0	0	0	0	0	0	0	0	0	0	0	0	0	0	0	0	0	0.00016907	0	2.35e-05	0	0	0	0	0	0	0	1.56e-05	2.97e-05	4.42e-05	Eukaryota	Hacrobia	Cryptophyta	Cryptophyceae	Cryptophyceae_X	Cryptomonadales	Teleaulax	Teleaulax_unclassified
OTU_1407	0.00136555	0	0	8.8e-06	0	0	0	1.14e-05	0	0	0	0	0	0	0	0	0	0	0	0	0	0	0	0	0	0	0	0	0	0	0	0	1.48e-05	0	Eukaryota	Alveolata	Dinoflagellata	Dinophyceae	Gymnodiniales	Gymnodiniaceae	Gyrodinium	Gyrodinium_helveticum
OTU_615	0.000819328	5.27e-05	0.000105217	0.000281576	0	0	0	0	0	0	0	0	0	0	0	0	0.000122382	3.56e-05	3.95e-05	0	0	0	0	0	0	0	0	0	0	0	0	0	0	0	Eukaryota	Rhizaria	Cercozoa	Filosa-Imbricatea	Spongomonadida	Spongomonadidae	Spongomonas	Spongomonas_unclassified
OTU_3924	0	0.000184531	0.00012626	7.04e-05	5.43e-05	0.000143292	0	1.14e-05	0	0	0	0	0	0	0	0	0	0	0	3.53e-05	1.45e-05	0	0	0	0	0	2.04e-05	0	0	0	0	0	0	0	Eukaryota	Alveolata	Ciliophora	Litostomatea	Haptoria_4	Didiniidae	Didiniidae_unclassified	Didiniidae_unclassified
OTU_559	0	0	0	0	0	0	0	0	0	0	0	0	0	0.000188708	0	0	0	0	0	0	0	0	5.46e-05	0	1.54e-05	2.92e-05	4.07e-05	0	0	0	0	0	0.000163328	0.000132704	Eukaryota	Stramenopiles	Ochrophyta	Pelagophyceae	Pelagophyceae_X	Pelagophyceae_XX	Pelagophyceae_XXX	Pelagophyceae_XXX_sp.
OTU_683	0.00121849	0.000237254	0.000420867	0.000272777	0	0	0	0	0	0	0	0	0	0	0	0.000495931	0.000351849	0	0	0	4.36e-05	0	0	0	0	0	0	0	0	0	0.00307387	0	0	0	Eukaryota	Stramenopiles	Ochrophyta	Chrysophyceae	Chrysophyceae_X	Chrysophyceae_XX	Chrysophyceae_XXX	Chrysophyceae_XXX_sp.
OTU_3338	0	0	0	2.64e-05	0	1.59e-05	0	0	0	0	0	0	0.00174618	0	0	0	0	0	1.97e-05	0	0	0	0	0	0	0	0	0	0	0	0	0	0	0	Eukaryota	Alveolata	Dinoflagellata	Dinophyceae	Gymnodiniales	Gymnodiniaceae	Gymnodiniaceae_unclassified	Gymnodiniaceae_unclassified
OTU_4930	0	0	0	8.8e-06	0	4.78e-05	0	0	0.000190842	0	0	0	0	0.00112046	0.0120922	0.000112712	0	0	1.97e-05	1.76e-05	0	7.68e-05	0.000327547	0.000494234	0.000307201	0.00538113	0.000671578	0.00307539	0.000105393	0	0.000661048	0.00278521	0.0018857	0.00423179	Eukaryota	Opisthokonta	Choanoflagellida	Choanoflagellatea	Acanthoecida	Stephanoecidae_Group_H	Stephanoecidae_Group_H_unclassified	Stephanoecidae_Group_H_unclassified
OTU_6844	0	0	0	0	0	0	0	0	0.000299895	0	0	0	0	0	0.00092214	0	0	0	0	0.000123509	0	0.000599428	0.00135113	0.00014121	0.000230401	0.000364575	0	0	0.000140523	0	0	0.000156472	5.94e-05	0.000368623	Eukaryota	Alveolata	Ciliophora	Spirotrichea	Choreotrichida	Strobilidiidae_A	Rimostrombidium_A	Rimostrombidium_A_sp.
OTU_2967	0	0	0	3.52e-05	0	0	0	0	0	0	0	0	0	0	0	6.76e-05	0	1.78e-05	0.000453971	0	0.000725942	1.54e-05	1.36e-05	0	0	0	0	0	0	0	0	0	0	0	Eukaryota	Rhizaria	Cercozoa	Cercozoa_unclassified	Cercozoa_unclassified	Cercozoa_unclassified	Cercozoa_unclassified	Cercozoa_unclassified
OTU_438	0.000231092	7.91e-05	0.000231477	0.000554353	0	0	0.000718102	4.55e-05	0	0	0	0	0	0	0	0	0.00013768	0	0	0	0	0	0	0	0	0	0	0	0	0	0	0	0	0	Eukaryota	Rhizaria	Cercozoa	Filosa-Thecofilosea	Cryomonadida	Rhogostoma-lineage	Rhogostoma-lineage_X	Rhogostoma-lineage_X_sp.
OTU_19663	0	0.000289977	0.000399823	0.000448762	0.0003803	0.000159213	0	0	0	0	0	0	0	1.18e-05	0	0	0	0	0	0	0	1.54e-05	0	0	0	0	0	0	0	0	0	1.56e-05	0	0	Eukaryota	Alveolata	Dinoflagellata	Dinophyceae	Dinophyceae_unclassified	Dinophyceae_unclassified	Dinophyceae_unclassified	Dinophyceae_unclassified
OTU_3785	0	0.000289977	2.1e-05	6.16e-05	0.000135822	0	0	0	0	0	0	0	0	0.000141531	1.74e-05	0	0	0	0	0	0	0	2.73e-05	0	0	0	0	0	3.51e-05	0	0	0	0	0	Eukaryota	Stramenopiles	Ochrophyta	Bacillariophyta	Bacillariophyta_X	Polar-centric-Mediophyceae	Chaetoceros	Chaetoceros_decipiens
OTU_3127	2.1e-05	0	2.1e-05	1.76e-05	0	0	0	0	0	0	0	0	0	0	0	2.25e-05	0.000703697	0	0	0	0	0	0	0	0	0	0	0	0	0	0	0	0	0	Eukaryota	Alveolata	Ciliophora	Spirotrichea	Choreotrichida	Strobilidiidae_C	Strobilidiidae_C_X	Strobilidiidae_C_X_sp.
OTU_146	0	0	2.1e-05	1.76e-05	8.15e-05	0.000206977	0	0	0	0	4.31e-05	0	0	0	0	0	0	0	0	0	0	0	0	4.71e-05	0	0	0	4.16e-05	0	0	0	0.00133002	0	0	Eukaryota	Hacrobia	Haptophyta	Prymnesiophyceae	Prymnesiales	Chrysochromulinaceae	Chrysochromulina	Chrysochromulina_sp.
OTU_722	0	0.000448147	0.000483997	0.000747937	0.00130389	0.000859749	0	0	0.000231737	1.76e-05	0	0	2.79e-05	2.36e-05	0.0015659	0	0	1.78e-05	0.000197379	0.000141153	7.26e-05	1.54e-05	0.00110547	2.35e-05	0.00132096	0.00427282	0.0012007	0	0.00168628	0	6.61e-05	3.13e-05	0.000193024	0.000117959	Eukaryota	Alveolata	Ciliophora	Litostomatea	Haptoria_4	Didiniidae	Didiniidae_X	Didiniidae_X_sp.
OTU_970	0	0	0	0	0	0	0	0	0	0	0	0	0	0	0	0	1.53e-05	1.78e-05	0.000414495	0.000194086	0.000725942	0.000276659	4.09e-05	0	0	0	0	0	0	0	0	0	0	0	Eukaryota	Stramenopiles	Ochrophyta	Bacillariophyta	Bacillariophyta_X	Polar-centric-Mediophyceae	Thalassiosira	Thalassiosira_guillardii
OTU_266	0	0	0	0	0	0	0.00238556	0	0	0	0	0	0	0	0	0.00180339	0.00151448	0.000106763	0	0	0	0	0	0	0	0	0	0	0	0	0	0	0	0	Eukaryota	Stramenopiles	Ochrophyta	Chrysophyceae	Chrysophyceae_X	Chrysophyceae_XX	Chrysophyceae_XXX	Chrysophyceae_XXX_sp.
OTU_4513	0	5.27e-05	2.1e-05	2.64e-05	0.000108657	0.000143292	0	0	0	0	0	0	0	0	0	0	0	0	0	0	0	0	0	0	0	0	0	0	0	0	0	4.69e-05	0	0	Eukaryota	Alveolata	Dinoflagellata	Dinophyceae	Dinophyceae_unclassified	Dinophyceae_unclassified	Dinophyceae_unclassified	Dinophyceae_unclassified
OTU_3372	0	0	0	0	0	3.18e-05	0	0	5.45e-05	0.000264742	0.000272867	0	0	0.000860981	0.000887342	0.000180339	0	0	0	3.53e-05	2.9e-05	0.000199809	0.000504968	0.000235349	0.0001536	0.0014583	0.00103789	0.00103898	0.000667486	0	0.000264419	3.13e-05	0.000727553	0.000575052	Eukaryota	Opisthokonta	Choanoflagellida	Choanoflagellatea	Acanthoecida	Stephanoecidae_Group_H	Diaphanoeca	Diaphanoeca_grandis
OTU_270	0	0	0	0	0	0	0	3.41e-05	0	0	0	0	0	0	0	0.00568066	0.0061497	0.000106763	0	1.76e-05	0	0	0	0	0	0	0	0	0	0	0	0	0	0	Eukaryota	Alveolata	Ciliophora	Spirotrichea	Choreotrichida	Strobilidiidae	Strobilidiidae_X	Strobilidiidae_X_sp.
OTU_1472	0	0	0	0	0	0	0	0	0	0	0	0	0	0	0	0	0	0.000871902	0.000315806	7.06e-05	0	1.54e-05	0	0	0	0	0	0	0	0	0	0	0	0	Eukaryota	Stramenopiles	Ochrophyta	Synurophyceae	Synurales	Synurales_X	Synurales_XX	Synurales_XX_sp.
OTU_680	0	0	8.42e-05	5.28e-05	8.15e-05	4.78e-05	0	0	0	0	0	0	0.00023748	0	3.48e-05	0	0	0	0	0	0	3.07e-05	0	0	0	0	0	0.00768847	0	0	0	0.000485065	0.00014848	0.000132704	Eukaryota	Alveolata	Dinoflagellata	Dinophyceae	Dinophyceae_unclassified	Dinophyceae_unclassified	Dinophyceae_unclassified	Dinophyceae_unclassified
OTU_874	8.4e-05	0	0	8.8e-06	0	0	0	0	0.0013359	0	0	0	0	0	0	0	0	0.00072955	0.000177641	0.000105865	0	6.15e-05	2.73e-05	0	0	0	0	0	0	0	0	0	0	0	Eukaryota	Stramenopiles	Ochrophyta	Bacillariophyta	Bacillariophyta_X	Radial-centric-basal-Coscinodiscophyceae	Aulacoseira	Aulacoseira_subarctica
[truncated: 2,896 more rows]
